# Supplementary material for: RNA-Seq Implies Divergent Regulation Patterns of LincRNA on Spermatogenesis and Testis Growth in Goats
Source: Animals (Basel). 2021 Feb 26;11(3):625. doi: 10.3390/ani11030625 (PMC7996862; doi:10.3390/ani11030625)
Supplement: Supplementary file 1 [file animals-11-00625-s001.zip]

Archive with 14 entries (14 files):
- Table S1.xlsx
- Table S2.xlsx
- Table S3.xlsx
- Table S4.xlsx
- Table S5.xlsx
- Table S6.xlsx
- Table S7.xlsx
- Table S8.xlsx
- Table S9.xlsx
- Table S10.xlsx
- Figure S1.pdf
- Figure S2.pdf
- Figure S3.pdf
- Figure S4.pdf
