# Supplementary material for: RNA-Seq Implies Divergent Regulation Patterns of LincRNA on Spermatogenesis and Testis Growth in Goats
Source: Animals (Basel). 2021 Feb 26;11(3):625. doi: 10.3390/ani11030625 (PMC7996862; doi:10.3390/ani11030625)
Supplement: Supplementary file 1 [file animals-11-00625-s001.zip › Table S1.xlsx]

## Sheet: Table S1
LincRNA transcript	LincRNA gene	Chromosome	Exon number	Transcript length (nt)
TCONS_00000046	XLOC_000027	1	2	952
TCONS_00000058	XLOC_000035	1	5	1700
TCONS_00000188	XLOC_000077	1	3	15785
TCONS_00000189	XLOC_000077	1	3	17734
TCONS_00000190	XLOC_000077	1	2	18269
TCONS_00000222	XLOC_000120	1	2	3713
TCONS_00000224	XLOC_000120	1	2	3106
TCONS_00000225	XLOC_000120	1	2	3836
TCONS_00000226	XLOC_000120	1	2	3728
TCONS_00000227	XLOC_000120	1	3	1299
TCONS_00000230	XLOC_000123	1	3	17231
TCONS_00000231	XLOC_000123	1	4	16316
TCONS_00000232	XLOC_000123	1	4	2677
TCONS_00000241	XLOC_000129	1	4	7110
TCONS_00000242	XLOC_000130	1	2	398
TCONS_00000248	XLOC_000135	1	2	7047
TCONS_00000273	XLOC_000154	1	2	2151
TCONS_00000278	XLOC_000158	1	2	1010
TCONS_00000280	XLOC_000159	1	2	460
TCONS_00000282	XLOC_000161	1	2	493
TCONS_00000296	XLOC_000172	1	2	1725
TCONS_00000339	XLOC_000213	1	2	3221
TCONS_00000348	XLOC_000222	1	2	533
TCONS_00000429	XLOC_000292	1	2	1135
TCONS_00000528	XLOC_000355	1	2	1137
TCONS_00000529	XLOC_000355	1	2	821
TCONS_00000533	XLOC_000359	1	3	2239
TCONS_00000575	XLOC_000397	1	2	806
TCONS_00000629	XLOC_000430	1	3	1382
TCONS_00000631	XLOC_000430	1	2	963
TCONS_00000642	XLOC_000430	1	2	2622
TCONS_00000668	XLOC_000449	1	2	970
TCONS_00000738	XLOC_000508	1	3	1020
TCONS_00000739	XLOC_000508	1	2	874
TCONS_00000740	XLOC_000508	1	2	922
TCONS_00000741	XLOC_000508	1	3	993
TCONS_00000742	XLOC_000508	1	2	1295
TCONS_00000770	XLOC_000534	1	3	1475
TCONS_00000771	XLOC_000534	1	4	1528
TCONS_00000772	XLOC_000534	1	3	1462
TCONS_00000787	XLOC_000534	1	4	1004
TCONS_00000788	XLOC_000534	1	5	830
TCONS_00000789	XLOC_000534	1	2	935
TCONS_00000790	XLOC_000534	1	3	981
TCONS_00000791	XLOC_000534	1	4	356
TCONS_00000801	XLOC_000534	1	3	1198
TCONS_00000802	XLOC_000534	1	4	1071
TCONS_00000807	XLOC_000534	1	3	2227
TCONS_00000840	XLOC_000594	1	2	322
TCONS_00000872	XLOC_000615	1	2	1366
TCONS_00000917	XLOC_000652	1	3	979
TCONS_00000952	XLOC_000680	1	3	9377
TCONS_00000954	XLOC_000680	1	7	1098
TCONS_00000955	XLOC_000680	1	5	877
TCONS_00000957	XLOC_000680	1	3	887
TCONS_00000958	XLOC_000680	1	2	1127
TCONS_00000959	XLOC_000680	1	3	1280
TCONS_00000968	XLOC_000680	1	2	815
TCONS_00001073	XLOC_000769	1	2	3186
TCONS_00001083	XLOC_000774	1	8	969
TCONS_00001117	XLOC_000797	1	2	6648
TCONS_00001119	XLOC_000797	1	2	4683
TCONS_00001155	XLOC_000831	1	2	1049
TCONS_00001281	XLOC_000942	1	2	667
TCONS_00001335	XLOC_000992	1	3	2510
TCONS_00001336	XLOC_000992	1	3	3055
TCONS_00001345	XLOC_001000	1	3	5200
TCONS_00001360	XLOC_001013	1	2	433
TCONS_00001404	XLOC_001046	1	2	713
TCONS_00001425	XLOC_001056	1	2	2264
TCONS_00001426	XLOC_001056	1	3	956
TCONS_00001441	XLOC_001069	1	2	3200
TCONS_00001495	XLOC_001121	1	2	3108
TCONS_00001523	XLOC_001147	1	2	364
TCONS_00001802	XLOC_001417	1	2	2902
TCONS_00001804	XLOC_001419	1	2	760
TCONS_00001819	XLOC_001429	1	2	976
TCONS_00001820	XLOC_001429	1	2	810
TCONS_00001821	XLOC_001429	1	3	962
TCONS_00001823	XLOC_001429	1	4	1758
TCONS_00001824	XLOC_001429	1	3	1231
TCONS_00001861	XLOC_001463	1	4	3633
TCONS_00001862	XLOC_001463	1	4	2341
TCONS_00001864	XLOC_001463	1	3	3516
TCONS_00001937	XLOC_001516	1	4	6268
TCONS_00001939	XLOC_001518	1	3	779
TCONS_00001940	XLOC_001518	1	4	1139
TCONS_00001941	XLOC_001518	1	4	1048
TCONS_00001942	XLOC_001518	1	4	1197
TCONS_00001943	XLOC_001518	1	4	972
TCONS_00001944	XLOC_001518	1	3	841
TCONS_00001945	XLOC_001518	1	3	424
TCONS_00001957	XLOC_001524	1	2	3257
TCONS_00001996	XLOC_001552	1	5	595
TCONS_00002127	XLOC_001640	1	2	3592
TCONS_00002128	XLOC_001640	1	2	4072
TCONS_00002129	XLOC_001640	1	2	1356
TCONS_00002132	XLOC_001642	1	2	2038
TCONS_00002139	XLOC_001648	1	2	3090
TCONS_00002141	XLOC_001648	1	2	2624
TCONS_00002142	XLOC_001648	1	2	3005
TCONS_00002143	XLOC_001648	1	2	2314
TCONS_00002208	XLOC_001692	1	2	375
TCONS_00002209	XLOC_001692	1	2	279
TCONS_00002427	XLOC_001811	1	5	1029
TCONS_00002489	XLOC_001871	1	4	1491
TCONS_00002507	XLOC_001888	1	4	3051
TCONS_00002508	XLOC_001888	1	5	2663
TCONS_00002509	XLOC_001888	1	3	783
TCONS_00002640	XLOC_001995	1	3	715
TCONS_00002641	XLOC_001995	1	3	699
TCONS_00002643	XLOC_001997	1	2	478
TCONS_00002645	XLOC_001999	1	2	624
TCONS_00002646	XLOC_001999	1	5	1129
TCONS_00002647	XLOC_001999	1	6	1194
TCONS_00002648	XLOC_001999	1	6	1291
TCONS_00002722	XLOC_002030	1	2	1921
TCONS_00002781	XLOC_002078	1	2	465
TCONS_00002878	XLOC_002161	1	2	2884
TCONS_00002892	XLOC_002171	1	3	1084
TCONS_00002893	XLOC_002171	1	3	854
TCONS_00002943	XLOC_002200	1	2	421
TCONS_00002950	XLOC_002207	1	2	1240
TCONS_00002961	XLOC_002218	1	2	3050
TCONS_00002972	XLOC_002228	1	2	1820
TCONS_00002973	XLOC_002228	1	2	362
TCONS_00002992	XLOC_002247	1	4	648
TCONS_00003098	XLOC_002287	1	2	4240
TCONS_00003132	XLOC_002298	1	2	1790
TCONS_00003133	XLOC_002298	1	5	737
TCONS_00003134	XLOC_002298	1	3	6051
TCONS_00003135	XLOC_002298	1	2	6346
TCONS_00003136	XLOC_002298	1	2	6859
TCONS_00003137	XLOC_002298	1	3	3481
TCONS_00003138	XLOC_002298	1	4	3472
TCONS_00003177	XLOC_002325	1	2	1208
TCONS_00003178	XLOC_002325	1	2	1300
TCONS_00003184	XLOC_002331	1	2	560
TCONS_00003187	XLOC_002333	1	3	845
TCONS_00003276	XLOC_002352	1	2	3220
TCONS_00003278	XLOC_002352	1	2	3099
TCONS_00003279	XLOC_002352	1	2	3157
TCONS_00003280	XLOC_002352	1	2	3131
TCONS_00003289	XLOC_002360	1	2	2112
TCONS_00003303	XLOC_002374	1	3	1343
TCONS_00003321	XLOC_002384	1	2	2199
TCONS_00003323	XLOC_002386	1	2	500
TCONS_00003326	XLOC_002389	1	3	710
TCONS_00003327	XLOC_002389	1	4	849
TCONS_00003328	XLOC_002389	1	3	773
TCONS_00003331	XLOC_002391	1	3	578
TCONS_00003332	XLOC_002391	1	2	374
TCONS_00003342	XLOC_002400	1	3	466
TCONS_00003343	XLOC_002400	1	3	1088
TCONS_00003455	XLOC_002447	1	2	1552
TCONS_00003459	XLOC_002451	1	3	1192
TCONS_00003460	XLOC_002451	1	3	1005
TCONS_00003461	XLOC_002451	1	3	1025
TCONS_00003479	XLOC_002462	1	4	666
TCONS_00003665	XLOC_002542	1	2	673
TCONS_00003674	XLOC_002549	1	2	16183
TCONS_00003747	XLOC_002575	1	2	560
TCONS_00003750	XLOC_002578	1	2	359
TCONS_00003755	XLOC_002578	1	2	731
TCONS_00003756	XLOC_002582	1	2	351
TCONS_00003765	XLOC_002587	1	5	3954
TCONS_00003766	XLOC_002587	1	3	4258
TCONS_00003773	XLOC_002587	1	3	6307
TCONS_00003774	XLOC_002587	1	5	5939
TCONS_00003907	XLOC_002658	1	2	1408
TCONS_00003909	XLOC_002658	1	3	1500
TCONS_00003910	XLOC_002658	1	3	1620
TCONS_00003912	XLOC_002658	1	2	1490
TCONS_00003914	XLOC_002658	1	2	2965
TCONS_00003948	XLOC_002681	1	2	2509
TCONS_00003955	XLOC_002687	1	3	1524
TCONS_00003956	XLOC_002687	1	3	1938
TCONS_00003957	XLOC_002687	1	2	1979
TCONS_00003959	XLOC_002689	1	2	1108
TCONS_00003967	XLOC_002694	1	3	1170
TCONS_00003969	XLOC_002694	1	2	1077
TCONS_00003970	XLOC_002694	1	2	1047
TCONS_00004068	XLOC_002760	1	3	1147
TCONS_00004087	XLOC_002771	1	5	6162
TCONS_00004088	XLOC_002771	1	3	15945
TCONS_00004089	XLOC_002771	1	6	20905
TCONS_00004090	XLOC_002771	1	2	11907
TCONS_00004091	XLOC_002771	1	4	5340
TCONS_00004092	XLOC_002771	1	6	2683
TCONS_00004100	XLOC_002771	1	3	2222
TCONS_00004194	XLOC_002854	1	2	372
TCONS_00004208	XLOC_002867	1	2	322
TCONS_00004210	XLOC_002867	1	3	485
TCONS_00004211	XLOC_002867	1	3	431
TCONS_00004212	XLOC_002868	1	2	33966
TCONS_00004213	XLOC_002868	1	3	28415
TCONS_00004214	XLOC_002868	1	2	33552
TCONS_00004215	XLOC_002868	1	3	28099
TCONS_00004216	XLOC_002868	1	3	28556
TCONS_00004217	XLOC_002868	1	3	28238
TCONS_00004280	XLOC_002905	1	2	8709
TCONS_00004281	XLOC_002905	1	3	6762
TCONS_00004330	XLOC_002936	1	2	691
TCONS_00004463	XLOC_002982	1	3	1074
TCONS_00004464	XLOC_002982	1	5	1419
TCONS_00004465	XLOC_002982	1	3	1615
TCONS_00004466	XLOC_002982	1	5	1319
TCONS_00004469	XLOC_002982	1	3	1440
TCONS_00004482	XLOC_002995	1	2	1343
TCONS_00004483	XLOC_002995	1	2	482
TCONS_00004486	XLOC_002998	1	3	2479
TCONS_00004487	XLOC_002998	1	3	2486
TCONS_00004488	XLOC_002998	1	3	2340
TCONS_00004489	XLOC_002998	1	4	1411
TCONS_00004505	XLOC_003004	1	2	2376
TCONS_00004523	XLOC_003008	1	3	1300
TCONS_00004524	XLOC_003008	1	2	1552
TCONS_00004588	XLOC_003042	1	2	708
TCONS_00004589	XLOC_003042	1	2	3734
TCONS_00004650	XLOC_003060	1	4	511
TCONS_00004651	XLOC_003060	1	3	753
TCONS_00004664	XLOC_003072	1	3	592
TCONS_00004725	XLOC_003082	1	3	2370
TCONS_00004726	XLOC_003082	1	3	3142
TCONS_00004729	XLOC_003082	1	4	1044
TCONS_00004738	XLOC_003082	1	3	1343
TCONS_00004739	XLOC_003142	1	4	866
TCONS_00004740	XLOC_003142	1	5	966
TCONS_00004772	XLOC_003163	1	2	3304
TCONS_00004888	XLOC_003265	1	4	10251
TCONS_00004889	XLOC_003265	1	4	6779
TCONS_00004910	XLOC_003265	1	2	3960
TCONS_00004953	XLOC_003323	1	2	688
TCONS_00005026	XLOC_003365	1	3	741
TCONS_00005033	XLOC_003372	1	2	1628
TCONS_00005035	XLOC_003373	1	2	311
TCONS_00005036	XLOC_003374	1	3	292
TCONS_00005118	XLOC_003449	1	2	510
TCONS_00005299	XLOC_003612	1	3	323
TCONS_00005354	XLOC_003646	1	3	943
TCONS_00005511	XLOC_003731	1	3	1648
TCONS_00005535	XLOC_003755	1	3	875
TCONS_00005597	XLOC_003800	1	5	676
TCONS_00005598	XLOC_003800	1	4	646
TCONS_00005599	XLOC_003800	1	5	680
TCONS_00005600	XLOC_003800	1	3	537
TCONS_00005601	XLOC_003800	1	4	471
TCONS_00005603	XLOC_003800	1	3	510
TCONS_00005604	XLOC_003800	1	4	648
TCONS_00005605	XLOC_003802	1	3	1568
TCONS_00005606	XLOC_003802	1	4	1907
TCONS_00005616	XLOC_003812	1	4	733
TCONS_00005619	XLOC_003815	1	3	727
TCONS_00005620	XLOC_003816	1	3	540
TCONS_00005625	XLOC_003819	1	2	930
TCONS_00005747	XLOC_003860	1	2	606
TCONS_00005748	XLOC_003860	1	3	640
TCONS_00005751	XLOC_003863	1	3	704
TCONS_00005762	XLOC_003871	1	2	1205
TCONS_00005797	XLOC_003905	1	2	1047
TCONS_00005798	XLOC_003905	1	2	992
TCONS_00005799	XLOC_003905	1	3	1069
TCONS_00005800	XLOC_003905	1	4	465
TCONS_00005801	XLOC_003905	1	3	1104
TCONS_00005802	XLOC_003905	1	3	327
TCONS_00005915	XLOC_003980	1	2	1287
TCONS_00005937	XLOC_003991	1	2	2484
TCONS_00005938	XLOC_003991	1	2	2945
TCONS_00005939	XLOC_003991	1	2	2915
TCONS_00005950	XLOC_003995	1	2	2463
TCONS_00005955	XLOC_004000	1	2	1131
TCONS_00005981	XLOC_004009	1	2	444
TCONS_00006009	XLOC_004042	1	2	1360
TCONS_00006106	XLOC_004094	1	2	2262
TCONS_00006161	XLOC_004123	1	4	357
TCONS_00006183	XLOC_004145	1	3	1552
TCONS_00006184	XLOC_004145	1	3	1549
TCONS_00006204	XLOC_004156	1	2	320
TCONS_00006206	XLOC_004158	1	2	470
TCONS_00006208	XLOC_004160	1	2	298
TCONS_00006467	XLOC_004313	1	3	1711
TCONS_00006468	XLOC_004313	1	2	1576
TCONS_00006492	XLOC_004329	1	2	548
TCONS_00006493	XLOC_004329	1	2	1011
TCONS_00006503	XLOC_004339	1	2	981
TCONS_00006613	XLOC_004445	1	3	353
TCONS_00006615	XLOC_004447	1	3	402
TCONS_00006625	XLOC_004455	1	2	375
TCONS_00006754	XLOC_004549	1	3	1940
TCONS_00006806	XLOC_004580	1	2	8215
TCONS_00006913	XLOC_004627	1	2	1313
TCONS_00006927	XLOC_004645	1	2	2748
TCONS_00006929	XLOC_004645	1	2	2285
TCONS_00006930	XLOC_004645	1	2	2188
TCONS_00006932	XLOC_004645	1	2	2218
TCONS_00006938	XLOC_004645	1	3	3259
TCONS_00006959	XLOC_004669	1	3	523
TCONS_00006979	XLOC_004680	1	2	3831
TCONS_00006992	XLOC_004693	1	2	3582
TCONS_00007034	XLOC_004719	1	3	1190
TCONS_00007035	XLOC_004719	1	3	851
TCONS_00007037	XLOC_004719	1	2	2031
TCONS_00007123	XLOC_004774	1	2	2576
TCONS_00007207	XLOC_004827	1	3	1170
TCONS_00007208	XLOC_004827	1	3	1103
TCONS_00007215	XLOC_004833	1	3	646
TCONS_00007321	XLOC_004878	1	4	5249
TCONS_00007322	XLOC_004878	1	2	5554
TCONS_00007325	XLOC_004878	1	2	3835
TCONS_00007334	XLOC_004878	1	2	1832
TCONS_00007346	XLOC_004895	1	3	1250
TCONS_00007347	XLOC_004895	1	3	1834
TCONS_00007348	XLOC_004895	1	2	932
TCONS_00007350	XLOC_004895	1	2	2613
TCONS_00007405	XLOC_004934	1	2	895
TCONS_00007437	XLOC_004952	1	2	2909
TCONS_00007454	XLOC_004963	1	2	5527
TCONS_00007487	XLOC_004977	1	4	5956
TCONS_00007510	XLOC_004994	1	3	599
TCONS_00007519	XLOC_005001	1	2	301
TCONS_00007527	XLOC_005009	1	2	572
TCONS_00007587	XLOC_005050	1	2	433
TCONS_00007595	XLOC_005053	1	2	1068
TCONS_00007600	XLOC_005057	1	2	5340
TCONS_00007602	XLOC_005057	1	3	4130
TCONS_00007603	XLOC_005057	1	6	5771
TCONS_00007606	XLOC_005057	1	3	3390
TCONS_00007607	XLOC_005057	1	2	2828
TCONS_00007612	XLOC_005061	1	2	3398
TCONS_00007655	XLOC_005069	1	2	1978
TCONS_00007656	XLOC_005069	1	2	1466
TCONS_00007657	XLOC_005069	1	3	3217
TCONS_00007658	XLOC_005069	1	5	2700
TCONS_00007659	XLOC_005069	1	2	1290
TCONS_00007660	XLOC_005069	1	5	2390
TCONS_00007663	XLOC_005071	1	2	818
TCONS_00007700	XLOC_005091	1	2	2327
TCONS_00007702	XLOC_005091	1	2	2325
TCONS_00007704	XLOC_005091	1	2	1913
TCONS_00007709	XLOC_005095	1	2	3805
TCONS_00007725	XLOC_005109	1	2	1478
TCONS_00007726	XLOC_005109	1	2	2883
TCONS_00007766	XLOC_005122	1	2	606
TCONS_00007791	XLOC_005124	1	3	1350
TCONS_00007821	XLOC_005149	1	2	499
TCONS_00007824	XLOC_005152	1	2	5616
TCONS_00007825	XLOC_005152	1	3	2454
TCONS_00007826	XLOC_005152	1	2	1691
TCONS_00007827	XLOC_005152	1	3	2114
TCONS_00007830	XLOC_005153	1	2	251
TCONS_00007839	XLOC_005162	1	2	610
TCONS_00007848	XLOC_005170	1	2	12889
TCONS_00007850	XLOC_005170	1	2	15333
TCONS_00007851	XLOC_005170	1	2	4089
TCONS_00007919	XLOC_005194	1	2	508
TCONS_00007920	XLOC_005194	1	2	440
TCONS_00007925	XLOC_005198	1	3	1556
TCONS_00007926	XLOC_005198	1	2	2466
TCONS_00008054	XLOC_005270	1	3	392
TCONS_00008065	XLOC_005274	1	2	1154
TCONS_00008067	XLOC_005274	1	3	863
TCONS_00008068	XLOC_005274	1	2	1256
TCONS_00008069	XLOC_005274	1	2	1262
TCONS_00008070	XLOC_005274	1	2	585
TCONS_00008204	XLOC_005323	1	2	2160
TCONS_00008205	XLOC_005323	1	2	2096
TCONS_00008214	XLOC_005332	1	2	1462
TCONS_00008215	XLOC_005333	1	2	1197
TCONS_00008230	XLOC_005345	1	2	742
TCONS_00008242	XLOC_005355	1	2	493
TCONS_00008243	XLOC_005356	1	2	3141
TCONS_00008317	XLOC_005378	1	3	2538
TCONS_00008320	XLOC_005380	1	2	1614
TCONS_00008323	XLOC_005382	1	2	1738
TCONS_00008332	XLOC_005384	1	2	6173
TCONS_00008379	XLOC_005402	1	2	5680
TCONS_00008406	XLOC_005406	1	3	3299
TCONS_00008407	XLOC_005406	1	5	2861
TCONS_00008408	XLOC_005406	1	4	1636
TCONS_00008409	XLOC_005406	1	4	2297
TCONS_00008411	XLOC_005406	1	3	2708
TCONS_00008413	XLOC_005406	1	4	3156
TCONS_00008414	XLOC_005406	1	4	2931
TCONS_00008431	XLOC_005417	1	2	3081
TCONS_00008450	XLOC_005428	1	2	5248
TCONS_00008460	XLOC_005433	1	2	3828
TCONS_00008461	XLOC_005433	1	3	2977
TCONS_00008462	XLOC_005433	1	3	3215
TCONS_00008464	XLOC_005436	1	3	630
TCONS_00008465	XLOC_005437	1	3	4738
TCONS_00008466	XLOC_005438	1	2	931
TCONS_00008468	XLOC_005437	1	5	5180
TCONS_00008470	XLOC_005437	1	4	5054
TCONS_00008471	XLOC_005437	1	2	894
TCONS_00008472	XLOC_005437	1	2	310
TCONS_00008473	XLOC_005441	1	2	374
TCONS_00008474	XLOC_005437	1	2	5357
TCONS_00008485	XLOC_005448	1	2	718
TCONS_00008527	XLOC_005466	1	2	602
TCONS_00008569	XLOC_005484	1	2	5062
TCONS_00008570	XLOC_005485	1	3	645
TCONS_00008571	XLOC_005485	1	3	932
TCONS_00008572	XLOC_005485	1	3	918
TCONS_00008573	XLOC_005485	1	4	2068
TCONS_00008574	XLOC_005485	1	4	761
TCONS_00008575	XLOC_005485	1	3	581
TCONS_00008583	XLOC_005485	1	3	3121
TCONS_00008595	XLOC_005500	1	2	610
TCONS_00008668	XLOC_005540	1	4	723
TCONS_00008692	XLOC_005562	1	3	367
TCONS_00008696	XLOC_005564	1	2	810
TCONS_00008697	XLOC_005564	1	2	451
TCONS_00008698	XLOC_005564	1	3	582
TCONS_00008699	XLOC_005564	1	2	860
TCONS_00008700	XLOC_005564	1	3	1059
TCONS_00008701	XLOC_005564	1	2	343
TCONS_00008749	XLOC_005591	1	3	3567
TCONS_00008760	XLOC_005609	1	2	2575
TCONS_00008767	XLOC_005611	1	2	1816
TCONS_00008787	XLOC_005618	1	2	1155
TCONS_00008788	XLOC_005618	1	2	1494
TCONS_00008794	XLOC_005618	1	3	1429
TCONS_00008853	XLOC_005663	1	3	518
TCONS_00008908	XLOC_005687	1	4	3073
TCONS_00008910	XLOC_005687	1	3	2580
TCONS_00008953	XLOC_005714	1	2	5091
TCONS_00008988	XLOC_005731	1	5	1805
TCONS_00008992	XLOC_005731	1	4	1844
TCONS_00008997	XLOC_005736	1	2	818
TCONS_00008998	XLOC_005736	1	2	931
TCONS_00009001	XLOC_005736	1	2	6818
TCONS_00009004	XLOC_005741	1	4	2687
TCONS_00009021	XLOC_005758	1	2	1158
TCONS_00009048	XLOC_005780	1	2	1639
TCONS_00009052	XLOC_005780	1	3	459
TCONS_00009078	XLOC_005801	1	3	2283
TCONS_00009094	XLOC_005815	1	2	1872
TCONS_00009135	XLOC_005826	1	4	1748
TCONS_00009164	XLOC_005854	1	2	1325
TCONS_00009167	XLOC_005854	1	2	3301
TCONS_00009168	XLOC_005856	1	2	542
TCONS_00009219	XLOC_005902	1	2	2925
TCONS_00009227	XLOC_005909	1	3	18748
TCONS_00009228	XLOC_005909	1	2	15722
TCONS_00009229	XLOC_005909	1	2	18636
TCONS_00009230	XLOC_005909	1	2	19142
TCONS_00009267	XLOC_005925	1	3	656
TCONS_00009282	XLOC_005936	1	4	900
TCONS_00009301	XLOC_005955	1	2	427
TCONS_00009305	XLOC_005959	1	2	6425
TCONS_00009306	XLOC_005959	1	2	6630
TCONS_00009337	XLOC_005983	1	2	829
TCONS_00009350	XLOC_005992	1	2	500
TCONS_00009353	XLOC_005995	1	2	1614
TCONS_00009377	XLOC_006019	1	3	1455
TCONS_00009408	XLOC_006046	1	3	4354
TCONS_00009559	XLOC_006176	1	2	4408
TCONS_00009611	XLOC_006221	1	2	5655
TCONS_00009647	XLOC_006254	1	2	19284
TCONS_00009648	XLOC_006254	1	2	17994
TCONS_00009651	XLOC_006254	1	2	15472
TCONS_00009697	XLOC_006296	1	2	608
TCONS_00009718	XLOC_006317	1	3	885
TCONS_00009892	XLOC_006477	1	2	1286
TCONS_00010017	XLOC_006557	1	2	692
TCONS_00010018	XLOC_006557	1	3	1100
TCONS_00010021	XLOC_006557	1	2	805
TCONS_00010022	XLOC_006557	1	3	2870
TCONS_00010054	XLOC_006585	1	4	433
TCONS_00010055	XLOC_006585	1	3	640
TCONS_00010150	XLOC_006665	1	2	346
TCONS_00010311	XLOC_006771	1	3	2336
TCONS_00010348	XLOC_006855	1	3	1811
TCONS_00010349	XLOC_006855	1	5	995
TCONS_00010350	XLOC_006855	1	5	866
TCONS_00010354	XLOC_006855	1	3	1004
TCONS_00010355	XLOC_006855	1	3	1516
TCONS_00010390	XLOC_006890	1	3	515
TCONS_00010391	XLOC_006890	1	3	529
TCONS_00010392	XLOC_006890	1	3	533
TCONS_00010393	XLOC_006890	1	3	525
TCONS_00010394	XLOC_006890	1	3	382
TCONS_00010408	XLOC_006893	1	3	331
TCONS_00010526	XLOC_006984	1	2	2473
TCONS_00010527	XLOC_006984	1	2	2510
TCONS_00010532	XLOC_006987	1	4	499
TCONS_00010543	XLOC_006997	1	7	874
TCONS_00010552	XLOC_007006	1	3	319
TCONS_00010554	XLOC_007006	1	3	872
TCONS_00010558	XLOC_007010	1	4	864
TCONS_00010559	XLOC_007010	1	4	747
TCONS_00010560	XLOC_007010	1	6	982
TCONS_00010591	XLOC_007040	1	2	2728
TCONS_00010592	XLOC_007040	1	3	2819
TCONS_00010677	XLOC_007105	1	2	3061
TCONS_00010720	XLOC_007141	1	2	319
TCONS_00010729	XLOC_007142	1	2	1914
TCONS_00010756	XLOC_007169	1	3	886
TCONS_00010853	XLOC_007244	1	2	2764
TCONS_00010871	XLOC_007261	1	3	18617
TCONS_00010872	XLOC_007261	1	2	9940
TCONS_00010873	XLOC_007261	1	3	21708
TCONS_00010874	XLOC_007261	1	4	18372
TCONS_00010875	XLOC_007261	1	3	21935
TCONS_00010895	XLOC_007272	1	2	5472
TCONS_00011073	XLOC_007376	1	4	462
TCONS_00011074	XLOC_007376	1	4	512
TCONS_00011276	XLOC_007522	1	2	565
TCONS_00011320	XLOC_007596	1	2	716
TCONS_00011404	XLOC_007627	1	2	4110
TCONS_00011427	XLOC_007652	1	2	3005
TCONS_00011438	XLOC_007627	1	2	1257
TCONS_00011482	XLOC_007699	1	2	1441
TCONS_00011531	XLOC_007746	1	2	3051
TCONS_00011556	XLOC_007754	1	2	1113
TCONS_00011565	XLOC_007762	1	2	4594
TCONS_00011567	XLOC_007763	1	2	682
TCONS_00011576	XLOC_007771	1	4	521
TCONS_00011577	XLOC_007771	1	4	368
TCONS_00011578	XLOC_007771	1	4	434
TCONS_00011582	XLOC_007771	1	3	358
TCONS_00011586	XLOC_007771	1	3	673
TCONS_00011587	XLOC_007771	1	3	525
TCONS_00011642	XLOC_007796	1	2	1131
TCONS_00011644	XLOC_007796	1	2	482
TCONS_00011786	XLOC_007847	1	2	319
TCONS_00011875	XLOC_007840	1	3	1136
TCONS_00011929	XLOC_007988	1	3	682
TCONS_00011930	XLOC_007988	1	2	560
TCONS_00011931	XLOC_007988	1	13	5591
TCONS_00011932	XLOC_007988	1	12	2055
TCONS_00011933	XLOC_007988	1	12	6037
TCONS_00011936	XLOC_007988	1	2	620
TCONS_00011941	XLOC_007988	1	11	1794
TCONS_00011942	XLOC_007988	1	3	4160
TCONS_00011943	XLOC_007988	1	11	2268
TCONS_00011944	XLOC_007988	1	9	1939
TCONS_00011945	XLOC_007988	1	11	2737
TCONS_00011947	XLOC_007988	1	9	5248
TCONS_00011948	XLOC_007988	1	7	1143
TCONS_00011949	XLOC_007988	1	7	1178
TCONS_00012021	XLOC_008056	1	2	3470
TCONS_00012031	XLOC_008064	1	3	6959
TCONS_00012120	XLOC_008145	1	2	2598
TCONS_00012317	XLOC_008339	1	2	10615
TCONS_00012385	XLOC_008406	1	5	481
TCONS_00012408	XLOC_008428	1	3	1290
TCONS_00012411	XLOC_008428	1	2	2425
TCONS_00012415	XLOC_008434	1	2	1120
TCONS_00012489	XLOC_008498	1	2	1062
TCONS_00012576	XLOC_008525	1	2	754
TCONS_00012836	XLOC_008620	1	5	1650
TCONS_00012837	XLOC_008620	1	5	858
TCONS_00012838	XLOC_008620	1	4	1953
TCONS_00012839	XLOC_008620	1	4	1707
TCONS_00012917	XLOC_008645	1	2	2254
TCONS_00012944	XLOC_008652	1	2	605
TCONS_00012946	XLOC_008652	1	2	7579
TCONS_00012990	XLOC_008670	1	2	1371
TCONS_00012998	XLOC_008674	1	2	1071
TCONS_00013054	XLOC_008684	1	2	494
TCONS_00013066	XLOC_008691	1	2	5777
TCONS_00013207	XLOC_008730	1	3	917
TCONS_00013210	XLOC_008732	1	2	4837
TCONS_00013212	XLOC_008734	1	3	3955
TCONS_00013213	XLOC_008734	1	3	3973
TCONS_00013214	XLOC_008734	1	2	4674
TCONS_00013215	XLOC_008734	1	3	4027
TCONS_00013216	XLOC_008735	1	2	2430
TCONS_00013217	XLOC_008735	1	2	629
TCONS_00013237	XLOC_008754	1	2	3890
TCONS_00013238	XLOC_008754	1	4	4141
TCONS_00013364	XLOC_008814	1	4	1374
TCONS_00013367	XLOC_008814	1	3	2208
TCONS_00013452	XLOC_008888	1	2	6516
TCONS_00013453	XLOC_008888	1	2	6909
TCONS_00013455	XLOC_008889	1	3	1531
TCONS_00013456	XLOC_008889	1	4	1447
TCONS_00013460	XLOC_008892	1	3	882
TCONS_00013461	XLOC_008892	1	3	4088
TCONS_00013462	XLOC_008892	1	2	5088
TCONS_00013463	XLOC_008892	1	2	347
TCONS_00013464	XLOC_008892	1	3	775
TCONS_00013465	XLOC_008892	1	2	5284
TCONS_00013466	XLOC_008892	1	2	6691
TCONS_00013467	XLOC_008892	1	2	6964
TCONS_00013578	XLOC_008953	1	3	420
TCONS_00013644	XLOC_008984	1	5	2783
TCONS_00013647	XLOC_008984	1	2	1215
TCONS_00013852	XLOC_009060	1	9	2194
TCONS_00013853	XLOC_009060	1	9	1631
TCONS_00013858	XLOC_009060	1	6	508
TCONS_00013859	XLOC_009060	1	5	2261
TCONS_00013860	XLOC_009060	1	5	2063
TCONS_00014015	XLOC_009077	1	3	3415
TCONS_00014016	XLOC_009077	1	3	4971
TCONS_00014022	XLOC_009077	1	4	3561
TCONS_00014062	XLOC_009219	1	2	1470
TCONS_00014063	XLOC_009219	1	3	1468
TCONS_00014064	XLOC_009219	1	2	1310
TCONS_00014065	XLOC_009219	1	2	1341
TCONS_00014071	XLOC_009223	1	2	1377
TCONS_00014072	XLOC_009223	1	2	1691
TCONS_00014073	XLOC_009223	1	4	1586
TCONS_00014215	XLOC_009312	1	2	741
TCONS_00014224	XLOC_009320	1	2	765
TCONS_00014293	XLOC_009376	1	2	825
TCONS_00014338	XLOC_009414	1	2	301
TCONS_00014417	XLOC_009476	1	2	8696
TCONS_00014559	XLOC_009433	1	4	9828
TCONS_00014560	XLOC_009433	1	3	1607
TCONS_00014713	XLOC_009758	1	2	4305
TCONS_00014714	XLOC_009758	1	2	4541
TCONS_00014715	XLOC_009758	1	3	2995
TCONS_00014842	XLOC_009871	1	2	783
TCONS_00014921	XLOC_009925	1	2	1227
TCONS_00014930	XLOC_009934	1	2	485
TCONS_00014957	XLOC_009957	1	3	6060
TCONS_00014958	XLOC_009957	1	4	6203
TCONS_00014968	XLOC_009966	1	2	1321
TCONS_00015019	XLOC_010015	1	3	1483
TCONS_00015020	XLOC_010015	1	3	1196
TCONS_00015021	XLOC_010015	1	3	1480
TCONS_00015030	XLOC_010024	1	2	1636
TCONS_00015084	XLOC_010047	1	3	1350
TCONS_00015100	XLOC_010055	1	2	407
TCONS_00015104	XLOC_010058	1	4	631
TCONS_00015105	XLOC_010058	1	3	663
TCONS_00015106	XLOC_010058	1	3	656
TCONS_00015107	XLOC_010058	1	4	750
TCONS_00015109	XLOC_010059	1	3	1411
TCONS_00015131	XLOC_010081	1	3	248
TCONS_00015230	XLOC_010156	1	2	7994
TCONS_00015231	XLOC_010156	1	3	7314
TCONS_00015257	XLOC_010186	1	3	1331
TCONS_00015266	XLOC_010193	1	2	11210
TCONS_00015267	XLOC_010193	1	2	2864
TCONS_00015272	XLOC_010197	1	2	605
TCONS_00015288	XLOC_010213	1	3	396
TCONS_00015292	XLOC_010213	1	4	902
TCONS_00015294	XLOC_010213	1	4	455
TCONS_00015295	XLOC_010213	1	5	10547
TCONS_00015306	XLOC_010213	1	2	1009
TCONS_00015325	XLOC_010245	1	4	1315
TCONS_00015437	XLOC_010356	1	8	706
TCONS_00015445	XLOC_010356	1	3	2977
TCONS_00015446	XLOC_010356	1	5	1124
TCONS_00015490	XLOC_010400	1	4	614
TCONS_00015593	XLOC_010463	1	2	1375
TCONS_00015594	XLOC_010463	1	4	1188
TCONS_00015595	XLOC_010463	1	3	926
TCONS_00015600	XLOC_010463	1	2	4217
TCONS_00015601	XLOC_010463	1	4	4359
TCONS_00015602	XLOC_010463	1	3	3214
TCONS_00015603	XLOC_010463	1	3	3217
TCONS_00015604	XLOC_010463	1	4	3286
TCONS_00015605	XLOC_010463	1	4	5016
TCONS_00015606	XLOC_010463	1	6	4180
TCONS_00015884	XLOC_010681	1	3	724
TCONS_00015890	XLOC_010687	1	3	1681
TCONS_00015965	XLOC_010705	1	2	421
TCONS_00015997	XLOC_010752	1	6	572
TCONS_00016019	XLOC_010759	1	2	497
TCONS_00016020	XLOC_010759	1	2	707
TCONS_00016021	XLOC_010759	1	3	690
TCONS_00016022	XLOC_010759	1	4	1612
TCONS_00016023	XLOC_010759	1	3	962
TCONS_00016024	XLOC_010759	1	3	1181
TCONS_00016030	XLOC_010759	1	2	1188
TCONS_00016033	XLOC_010759	1	3	2236
TCONS_00016034	XLOC_010759	1	2	1327
TCONS_00016126	XLOC_010858	1	2	3623
TCONS_00016220	XLOC_010932	1	3	2910
TCONS_00016221	XLOC_010932	1	2	6445
TCONS_00016254	XLOC_010962	1	2	769
TCONS_00016272	XLOC_010962	1	2	638
TCONS_00016273	XLOC_010962	1	2	783
TCONS_00016279	XLOC_010984	1	2	543
TCONS_00016280	XLOC_010985	1	3	826
TCONS_00016432	XLOC_011065	1	2	382
TCONS_00016569	XLOC_011161	1	2	2390
TCONS_00016604	XLOC_011185	1	3	819
TCONS_00016695	XLOC_011267	1	2	1929
TCONS_00016752	XLOC_011323	1	2	1748
TCONS_00016753	XLOC_011323	1	2	1662
TCONS_00016758	XLOC_011323	1	3	1310
TCONS_00016760	XLOC_011323	1	2	1616
TCONS_00016766	XLOC_011334	1	3	3195
TCONS_00016767	XLOC_011334	1	3	2356
TCONS_00016787	XLOC_011352	1	2	362
TCONS_00016802	XLOC_011365	1	2	4457
TCONS_00016822	XLOC_011382	1	2	720
TCONS_00016870	XLOC_011418	1	3	4492
TCONS_00016871	XLOC_011418	1	3	4832
TCONS_00016872	XLOC_011418	1	3	12064
TCONS_00016873	XLOC_011418	1	3	12698
TCONS_00016877	XLOC_011421	1	3	605
TCONS_00016891	XLOC_011434	1	2	1276
TCONS_00016915	XLOC_011446	1	2	2297
TCONS_00016986	XLOC_011480	1	2	519
TCONS_00017035	XLOC_011521	1	2	3876
TCONS_00017036	XLOC_011521	1	2	1967
TCONS_00017055	XLOC_011529	1	4	1286
TCONS_00017056	XLOC_011529	1	4	258
TCONS_00017104	XLOC_011549	1	2	487
TCONS_00017128	XLOC_011573	1	2	775
TCONS_00017142	XLOC_011585	1	3	257
TCONS_00017143	XLOC_011585	1	3	288
TCONS_00017147	XLOC_011588	1	3	1945
TCONS_00017194	XLOC_011629	1	2	754
TCONS_00017367	XLOC_011731	1	2	2529
TCONS_00017381	XLOC_011742	1	3	841
TCONS_00017506	XLOC_011814	1	2	1842
TCONS_00017534	XLOC_011835	1	2	1863
TCONS_00017584	XLOC_011863	1	2	1905
TCONS_00017585	XLOC_011863	1	2	1896
TCONS_00017600	XLOC_011865	1	2	6103
TCONS_00017655	XLOC_011897	1	2	2729
TCONS_00017656	XLOC_011897	1	2	2253
TCONS_00017657	XLOC_011897	1	2	2464
TCONS_00017661	XLOC_011899	1	2	3583
TCONS_00017699	XLOC_011928	1	3	1195
TCONS_00017703	XLOC_011932	1	2	1177
TCONS_00017704	XLOC_011933	1	2	284
TCONS_00017718	XLOC_011941	1	2	1921
TCONS_00017733	XLOC_011950	1	2	2679
TCONS_00017740	XLOC_011953	1	4	655
TCONS_00017741	XLOC_011953	1	4	696
TCONS_00017742	XLOC_011953	1	4	654
TCONS_00017772	XLOC_011966	1	2	1646
TCONS_00017790	XLOC_011979	1	5	3147
TCONS_00017791	XLOC_011979	1	5	3079
TCONS_00017800	XLOC_011986	1	2	2563
TCONS_00017801	XLOC_011986	1	2	1826
TCONS_00017895	XLOC_012036	1	3	1222
TCONS_00017896	XLOC_012036	1	2	1117
TCONS_00017924	XLOC_012054	1	3	737
TCONS_00017931	XLOC_012061	1	2	721
TCONS_00018025	XLOC_012113	1	2	1229
TCONS_00018027	XLOC_012115	1	2	1618
TCONS_00018039	XLOC_012127	1	2	8172
TCONS_00018040	XLOC_012127	1	2	8071
TCONS_00018072	XLOC_012141	1	4	550
TCONS_00018073	XLOC_012141	1	4	553
TCONS_00018074	XLOC_012141	1	5	857
TCONS_00018075	XLOC_012141	1	5	723
TCONS_00018076	XLOC_012141	1	5	633
TCONS_00018083	XLOC_012148	1	4	4412
TCONS_00018084	XLOC_012148	1	4	2592
TCONS_00018085	XLOC_012148	1	4	2212
TCONS_00018087	XLOC_012148	1	3	1484
TCONS_00018150	XLOC_012183	1	3	4931
TCONS_00018151	XLOC_012183	1	3	503
TCONS_00018182	XLOC_012198	1	2	5731
TCONS_00018205	XLOC_012218	1	2	1981
TCONS_00018206	XLOC_012218	1	3	2392
TCONS_00018207	XLOC_012218	1	2	2078
TCONS_00018208	XLOC_012218	1	2	952
TCONS_00018259	XLOC_012263	1	2	319
TCONS_00018260	XLOC_012263	1	2	615
TCONS_00018263	XLOC_012266	1	2	660
TCONS_00018264	XLOC_012266	1	2	1033
TCONS_00018335	XLOC_012321	1	2	3276
TCONS_00018353	XLOC_012338	1	2	577
TCONS_00018357	XLOC_012342	1	6	1692
TCONS_00018358	XLOC_012342	1	6	1699
TCONS_00018359	XLOC_012342	1	6	746
TCONS_00018360	XLOC_012342	1	6	650
TCONS_00018361	XLOC_012342	1	5	629
TCONS_00018399	XLOC_012363	1	2	4539
TCONS_00018400	XLOC_012363	1	2	4542
TCONS_00018408	XLOC_012366	1	2	2770
TCONS_00018416	XLOC_012373	1	2	5489
TCONS_00018458	XLOC_012397	1	2	756
TCONS_00018513	XLOC_012422	1	2	797
TCONS_00018595	XLOC_012470	1	2	1436
TCONS_00018596	XLOC_012470	1	2	1541
TCONS_00018601	XLOC_012473	1	2	797
TCONS_00018686	XLOC_012517	1	4	901
TCONS_00018687	XLOC_012517	1	4	947
TCONS_00018688	XLOC_012517	1	4	924
TCONS_00018689	XLOC_012517	1	3	821
TCONS_00018690	XLOC_012517	1	4	343
TCONS_00018691	XLOC_012518	1	3	588
TCONS_00018692	XLOC_012518	1	2	401
TCONS_00018710	XLOC_012522	1	2	991
TCONS_00018775	XLOC_012572	1	2	3322
TCONS_00018812	XLOC_012586	1	2	2086
TCONS_00018813	XLOC_012586	1	3	1665
TCONS_00018939	XLOC_012702	10	2	1468
TCONS_00018948	XLOC_012710	10	2	6182
TCONS_00018950	XLOC_012710	10	2	5482
TCONS_00018952	XLOC_012711	10	2	7712
TCONS_00018953	XLOC_012712	10	3	8013
TCONS_00018954	XLOC_012712	10	2	8887
TCONS_00018965	XLOC_012716	10	2	6889
TCONS_00018999	XLOC_012730	10	2	1394
TCONS_00019001	XLOC_012731	10	3	583
TCONS_00019002	XLOC_012731	10	7	2347
TCONS_00019020	XLOC_012741	10	2	4150
TCONS_00019022	XLOC_012743	10	3	896
TCONS_00019024	XLOC_012743	10	3	895
TCONS_00019066	XLOC_012765	10	2	639
TCONS_00019073	XLOC_012770	10	3	2216
TCONS_00019076	XLOC_012770	10	4	1843
TCONS_00019082	XLOC_012776	10	2	1425
TCONS_00019093	XLOC_012786	10	4	422
TCONS_00019137	XLOC_012800	10	2	5166
TCONS_00019138	XLOC_012800	10	2	5129
TCONS_00019139	XLOC_012800	10	4	3411
TCONS_00019140	XLOC_012800	10	4	3322
TCONS_00019186	XLOC_012823	10	3	6431
TCONS_00019187	XLOC_012823	10	3	3779
TCONS_00019188	XLOC_012823	10	3	2351
TCONS_00019242	XLOC_012864	10	2	2342
TCONS_00019243	XLOC_012864	10	2	1758
TCONS_00019244	XLOC_012864	10	3	1017
TCONS_00019255	XLOC_012875	10	3	448
TCONS_00019256	XLOC_012876	10	3	216
TCONS_00019269	XLOC_012886	10	2	4301
TCONS_00019270	XLOC_012886	10	2	4502
TCONS_00019271	XLOC_012886	10	2	4272
TCONS_00019279	XLOC_012894	10	4	346
TCONS_00019323	XLOC_012931	10	2	1199
TCONS_00019326	XLOC_012933	10	2	2095
TCONS_00019327	XLOC_012933	10	3	521
TCONS_00019358	XLOC_012963	10	2	475
TCONS_00019359	XLOC_012963	10	2	459
TCONS_00019366	XLOC_012970	10	5	1161
TCONS_00019392	XLOC_012982	10	3	1420
TCONS_00019393	XLOC_012982	10	2	1329
TCONS_00019462	XLOC_013028	10	2	5154
TCONS_00019478	XLOC_013032	10	2	1951
TCONS_00019481	XLOC_013035	10	2	3691
TCONS_00019483	XLOC_013035	10	2	369
TCONS_00019515	XLOC_013050	10	2	1984
TCONS_00019579	XLOC_013080	10	4	3584
TCONS_00019580	XLOC_013080	10	4	3276
TCONS_00019582	XLOC_013080	10	3	3229
TCONS_00019584	XLOC_013080	10	2	3418
TCONS_00019608	XLOC_013096	10	3	10856
TCONS_00019624	XLOC_013100	10	2	513
TCONS_00019641	XLOC_013111	10	3	624
TCONS_00019741	XLOC_013144	10	2	322
TCONS_00019766	XLOC_013148	10	2	983
TCONS_00019841	XLOC_013172	10	2	810
TCONS_00019890	XLOC_013189	10	2	2202
TCONS_00019894	XLOC_013191	10	2	1119
TCONS_00019904	XLOC_013199	10	2	7033
TCONS_00019905	XLOC_013199	10	2	6943
TCONS_00019907	XLOC_013199	10	2	3549
TCONS_00019914	XLOC_013206	10	2	695
TCONS_00019915	XLOC_013206	10	3	955
TCONS_00019916	XLOC_013206	10	2	655
TCONS_00019927	XLOC_013215	10	3	9298
TCONS_00019928	XLOC_013215	10	3	10347
TCONS_00019929	XLOC_013215	10	3	10241
TCONS_00019930	XLOC_013215	10	3	1657
TCONS_00019931	XLOC_013215	10	4	854
TCONS_00019935	XLOC_013215	10	2	1218
TCONS_00019936	XLOC_013215	10	2	1943
TCONS_00019937	XLOC_013215	10	3	1293
TCONS_00019938	XLOC_013215	10	3	986
TCONS_00019976	XLOC_013239	10	2	5581
TCONS_00020048	XLOC_013278	10	3	1144
TCONS_00020049	XLOC_013278	10	3	1300
TCONS_00020050	XLOC_013278	10	3	981
TCONS_00020085	XLOC_013299	10	2	1204
TCONS_00020099	XLOC_013304	10	2	2331
TCONS_00020100	XLOC_013304	10	3	2341
TCONS_00020101	XLOC_013304	10	3	394
TCONS_00020107	XLOC_013309	10	2	865
TCONS_00020124	XLOC_013326	10	2	1976
TCONS_00020125	XLOC_013326	10	3	553
TCONS_00020133	XLOC_013334	10	2	4611
TCONS_00020134	XLOC_013334	10	3	3385
TCONS_00020136	XLOC_013336	10	2	7869
TCONS_00020138	XLOC_013336	10	2	1122
TCONS_00020143	XLOC_013341	10	2	1054
TCONS_00020144	XLOC_013341	10	2	1235
TCONS_00020152	XLOC_013341	10	2	666
TCONS_00020246	XLOC_013395	10	2	811
TCONS_00020264	XLOC_013411	10	5	479
TCONS_00020265	XLOC_013411	10	4	1190
TCONS_00020266	XLOC_013411	10	4	1175
TCONS_00020269	XLOC_013411	10	3	1694
TCONS_00020270	XLOC_013411	10	4	1304
TCONS_00020294	XLOC_013437	10	2	720
TCONS_00020297	XLOC_013439	10	3	791
TCONS_00020299	XLOC_013439	10	3	1339
TCONS_00020301	XLOC_013442	10	5	1841
TCONS_00020302	XLOC_013442	10	6	1574
TCONS_00020303	XLOC_013443	10	4	1242
TCONS_00020304	XLOC_013443	10	4	1236
TCONS_00020305	XLOC_013443	10	4	1388
TCONS_00020306	XLOC_013443	10	2	1064
TCONS_00020310	XLOC_013446	10	2	1054
TCONS_00020312	XLOC_013447	10	2	2699
TCONS_00020313	XLOC_013448	10	3	2826
TCONS_00020364	XLOC_013474	10	2	10159
TCONS_00020369	XLOC_013474	10	2	10038
TCONS_00020380	XLOC_013477	10	2	2051
TCONS_00020441	XLOC_013509	10	2	827
TCONS_00020450	XLOC_013509	10	2	845
TCONS_00020523	XLOC_013557	10	2	3054
TCONS_00020544	XLOC_013580	10	3	1168
TCONS_00020613	XLOC_013622	10	2	1602
TCONS_00020615	XLOC_013622	10	3	2870
TCONS_00020616	XLOC_013622	10	3	2962
TCONS_00020617	XLOC_013622	10	4	1622
TCONS_00020618	XLOC_013622	10	4	1514
TCONS_00020621	XLOC_013622	10	3	1081
TCONS_00020707	XLOC_013689	10	3	1874
TCONS_00020708	XLOC_013689	10	4	1951
TCONS_00020709	XLOC_013689	10	3	3567
TCONS_00020710	XLOC_013689	10	5	1071
TCONS_00020743	XLOC_013719	10	4	3697
TCONS_00020758	XLOC_013729	10	4	5000
TCONS_00020759	XLOC_013729	10	3	3386
TCONS_00020760	XLOC_013729	10	4	3501
TCONS_00020918	XLOC_013862	10	5	790
TCONS_00020919	XLOC_013862	10	4	702
TCONS_00020920	XLOC_013862	10	4	690
TCONS_00020937	XLOC_013864	10	3	486
TCONS_00020942	XLOC_013864	10	2	687
TCONS_00020959	XLOC_013879	10	2	2527
TCONS_00020969	XLOC_013888	10	3	1108
TCONS_00020970	XLOC_013888	10	3	1926
TCONS_00020971	XLOC_013888	10	3	1066
TCONS_00020973	XLOC_013888	10	3	4321
TCONS_00020975	XLOC_013888	10	2	10992
TCONS_00020980	XLOC_013891	10	2	1389
TCONS_00021049	XLOC_013954	10	3	3012
TCONS_00021134	XLOC_014011	10	2	1749
TCONS_00021145	XLOC_014021	10	3	291
TCONS_00021152	XLOC_014023	10	3	2020
TCONS_00021186	XLOC_014056	10	2	627
TCONS_00021187	XLOC_014056	10	2	696
TCONS_00021398	XLOC_014201	10	3	276
TCONS_00021439	XLOC_014225	10	2	5297
TCONS_00021513	XLOC_014268	10	2	556
TCONS_00021563	XLOC_014283	10	4	872
TCONS_00021593	XLOC_014319	10	2	1272
TCONS_00021643	XLOC_014349	10	2	698
TCONS_00021656	XLOC_014362	10	2	669
TCONS_00021670	XLOC_014376	10	3	1457
TCONS_00021673	XLOC_014378	10	2	3642
TCONS_00021675	XLOC_014379	10	2	1723
TCONS_00021681	XLOC_014379	10	2	942
TCONS_00021690	XLOC_014379	10	2	967
TCONS_00021767	XLOC_014463	10	2	558
TCONS_00021781	XLOC_014477	10	2	5047
TCONS_00021782	XLOC_014477	10	3	2601
TCONS_00021783	XLOC_014477	10	2	4959
TCONS_00021784	XLOC_014477	10	3	1552
TCONS_00021896	XLOC_014551	10	2	5416
TCONS_00021904	XLOC_014554	10	2	1335
TCONS_00021905	XLOC_014554	10	2	1548
TCONS_00022010	XLOC_014641	10	2	481
TCONS_00022011	XLOC_014641	10	2	675
TCONS_00022012	XLOC_014641	10	2	920
TCONS_00022014	XLOC_014643	10	4	995
TCONS_00022015	XLOC_014643	10	4	992
TCONS_00022018	XLOC_014643	10	3	5657
TCONS_00022036	XLOC_014661	10	4	787
TCONS_00022037	XLOC_014661	10	3	1745
TCONS_00022038	XLOC_014661	10	3	323
TCONS_00022042	XLOC_014661	10	2	1544
TCONS_00022043	XLOC_014661	10	2	1473
TCONS_00022165	XLOC_014722	10	2	574
TCONS_00022173	XLOC_014730	10	3	400
TCONS_00022174	XLOC_014730	10	4	461
TCONS_00022186	XLOC_014741	10	2	949
TCONS_00022187	XLOC_014742	10	2	440
TCONS_00022188	XLOC_014742	10	2	426
TCONS_00022189	XLOC_014742	10	2	428
TCONS_00022301	XLOC_014818	10	3	3080
TCONS_00022302	XLOC_014818	10	5	4623
TCONS_00022303	XLOC_014818	10	2	3328
TCONS_00022304	XLOC_014818	10	4	4869
TCONS_00022305	XLOC_014818	10	3	5267
TCONS_00022306	XLOC_014818	10	3	4693
TCONS_00022309	XLOC_014818	10	2	4545
TCONS_00022310	XLOC_014818	10	2	4554
TCONS_00022346	XLOC_014836	10	2	484
TCONS_00022347	XLOC_014836	10	2	489
TCONS_00022350	XLOC_014839	10	2	654
TCONS_00022380	XLOC_014853	10	2	467
TCONS_00022424	XLOC_014867	10	2	1905
TCONS_00022431	XLOC_014873	10	2	860
TCONS_00022432	XLOC_014873	10	2	2455
TCONS_00022469	XLOC_014900	10	2	908
TCONS_00022470	XLOC_014900	10	2	419
TCONS_00022484	XLOC_014913	10	2	3193
TCONS_00022485	XLOC_014913	10	2	2907
TCONS_00022556	XLOC_014978	10	3	2350
TCONS_00022557	XLOC_014978	10	2	2257
TCONS_00022568	XLOC_014978	10	2	2453
TCONS_00022623	XLOC_015013	10	3	1107
TCONS_00022624	XLOC_015013	10	3	1013
TCONS_00022625	XLOC_015013	10	2	1271
TCONS_00022737	XLOC_015054	10	5	1954
TCONS_00022842	XLOC_015169	10	3	3148
TCONS_00022843	XLOC_015169	10	3	1674
TCONS_00022844	XLOC_015169	10	3	2310
TCONS_00022876	XLOC_015196	10	2	280
TCONS_00022877	XLOC_015196	10	2	532
TCONS_00023167	XLOC_015374	10	5	747
TCONS_00023234	XLOC_015416	10	2	866
TCONS_00023280	XLOC_015441	10	2	3161
TCONS_00023364	XLOC_015466	10	2	3197
TCONS_00023451	XLOC_015549	10	2	627
TCONS_00023467	XLOC_015555	10	2	5838
TCONS_00023487	XLOC_015575	10	2	773
TCONS_00023501	XLOC_015587	10	2	842
TCONS_00023506	XLOC_015582	10	4	803
TCONS_00023509	XLOC_015582	10	4	500
TCONS_00023549	XLOC_015611	10	3	1166
TCONS_00023551	XLOC_015611	10	2	993
TCONS_00023558	XLOC_015617	10	2	475
TCONS_00023559	XLOC_015617	10	5	655
TCONS_00023562	XLOC_015617	10	3	583
TCONS_00023563	XLOC_015617	10	5	727
TCONS_00023564	XLOC_015617	10	4	1880
TCONS_00023565	XLOC_015617	10	5	803
TCONS_00023598	XLOC_015617	10	3	3403
TCONS_00023625	XLOC_015617	10	7	2877
TCONS_00023644	XLOC_015695	10	2	661
TCONS_00023652	XLOC_015617	10	7	1862
TCONS_00023654	XLOC_015617	10	4	1554
TCONS_00023655	XLOC_015617	10	3	585
TCONS_00023656	XLOC_015617	10	4	1577
TCONS_00023670	XLOC_015717	10	3	785
TCONS_00023671	XLOC_015717	10	2	1101
TCONS_00023672	XLOC_015717	10	3	671
TCONS_00023673	XLOC_015717	10	2	852
TCONS_00023682	XLOC_015617	10	2	2162
TCONS_00023802	XLOC_015819	10	2	335
TCONS_00023826	XLOC_015824	10	3	533
TCONS_00023828	XLOC_015824	10	3	504
TCONS_00023931	XLOC_015899	10	2	1258
TCONS_00024110	XLOC_015990	10	3	854
TCONS_00024142	XLOC_016002	10	2	309
TCONS_00024160	XLOC_016017	10	2	292
TCONS_00024167	XLOC_016011	10	3	2065
TCONS_00024190	XLOC_016042	10	4	534
TCONS_00024191	XLOC_016042	10	4	411
TCONS_00024203	XLOC_016051	10	2	1172
TCONS_00024209	XLOC_016057	10	2	318
TCONS_00024215	XLOC_016062	10	3	713
TCONS_00024231	XLOC_016070	10	2	341
TCONS_00024309	XLOC_016098	10	2	279
TCONS_00024311	XLOC_016099	10	2	3236
TCONS_00024318	XLOC_016102	10	2	5535
TCONS_00024319	XLOC_016102	10	2	5544
TCONS_00024320	XLOC_016102	10	2	2254
TCONS_00024385	XLOC_016135	10	3	1081
TCONS_00024386	XLOC_016135	10	2	4336
TCONS_00024387	XLOC_016135	10	2	4605
TCONS_00024388	XLOC_016135	10	3	1347
TCONS_00024401	XLOC_016145	10	2	1007
TCONS_00024404	XLOC_016147	10	3	5392
TCONS_00024405	XLOC_016147	10	2	5231
TCONS_00024455	XLOC_016161	10	2	507
TCONS_00024691	XLOC_016275	10	2	374
TCONS_00024694	XLOC_016277	10	2	1014
TCONS_00024716	XLOC_016294	10	2	2888
TCONS_00024733	XLOC_016301	10	4	639
TCONS_00024734	XLOC_016301	10	3	1561
TCONS_00024735	XLOC_016301	10	5	845
TCONS_00024736	XLOC_016301	10	6	981
TCONS_00024737	XLOC_016301	10	2	1689
TCONS_00024751	XLOC_016301	10	3	1056
TCONS_00024755	XLOC_016301	10	2	1227
TCONS_00024759	XLOC_016319	10	3	740
TCONS_00024774	XLOC_016329	10	2	2349
TCONS_00024779	XLOC_016333	10	2	515
TCONS_00024788	XLOC_016342	10	3	559
TCONS_00024789	XLOC_016342	10	5	959
TCONS_00024790	XLOC_016342	10	3	681
TCONS_00024791	XLOC_016342	10	4	752
TCONS_00024793	XLOC_016344	10	2	1477
TCONS_00024879	XLOC_016391	10	2	674
TCONS_00024885	XLOC_016397	10	2	479
TCONS_00024916	XLOC_016405	10	2	8722
TCONS_00025097	XLOC_016476	10	2	1870
TCONS_00025177	XLOC_016515	10	2	654
TCONS_00025178	XLOC_016515	10	2	524
TCONS_00025179	XLOC_016515	10	2	432
TCONS_00025208	XLOC_016528	10	2	3887
TCONS_00025209	XLOC_016528	10	3	3245
TCONS_00025309	XLOC_016588	10	2	2688
TCONS_00025391	XLOC_016662	10	2	13326
TCONS_00025392	XLOC_016662	10	2	12088
TCONS_00025398	XLOC_016664	10	3	947
TCONS_00025401	XLOC_016664	10	2	1336
TCONS_00025486	XLOC_016692	10	2	427
TCONS_00025488	XLOC_016692	10	2	2197
TCONS_00025521	XLOC_016724	10	2	847
TCONS_00025525	XLOC_016728	10	2	1187
TCONS_00025534	XLOC_016732	10	2	480
TCONS_00025535	XLOC_016733	10	3	421
TCONS_00025536	XLOC_016733	10	2	2358
TCONS_00025537	XLOC_016733	10	3	541
TCONS_00025538	XLOC_016733	10	3	2470
TCONS_00025560	XLOC_016739	10	2	686
TCONS_00025610	XLOC_016782	10	3	760
TCONS_00025613	XLOC_016782	10	2	2008
TCONS_00025654	XLOC_016799	10	3	1471
TCONS_00025655	XLOC_016799	10	6	628
TCONS_00025662	XLOC_016799	10	4	1104
TCONS_00025725	XLOC_016847	10	2	2383
TCONS_00025812	XLOC_016899	10	3	1049
TCONS_00025840	XLOC_016923	10	5	1436
TCONS_00025841	XLOC_016923	10	6	1412
TCONS_00025842	XLOC_016923	10	7	1563
TCONS_00025851	XLOC_016923	10	2	1295
TCONS_00025977	XLOC_017003	10	2	4240
TCONS_00025999	XLOC_017015	10	2	3740
TCONS_00026038	XLOC_017045	10	3	553
TCONS_00026052	XLOC_017054	10	4	5063
TCONS_00026053	XLOC_017054	10	5	2747
TCONS_00026056	XLOC_017054	10	3	6564
TCONS_00026061	XLOC_017057	10	2	542
TCONS_00026099	XLOC_017093	10	2	4220
TCONS_00026124	XLOC_017106	10	2	2454
TCONS_00026128	XLOC_017109	10	2	3443
TCONS_00026129	XLOC_017109	10	2	3616
TCONS_00026136	XLOC_017109	10	2	857
TCONS_00026137	XLOC_017109	10	2	819
TCONS_00026138	XLOC_017109	10	3	1799
TCONS_00026139	XLOC_017109	10	3	1402
TCONS_00026140	XLOC_017109	10	4	1656
TCONS_00026141	XLOC_017109	10	3	1891
TCONS_00026142	XLOC_017109	10	4	1530
TCONS_00026143	XLOC_017109	10	3	1276
TCONS_00026144	XLOC_017109	10	2	1637
TCONS_00026145	XLOC_017116	10	3	7110
TCONS_00026155	XLOC_017124	10	2	907
TCONS_00026157	XLOC_017126	10	2	2324
TCONS_00026161	XLOC_017130	10	4	648
TCONS_00026163	XLOC_017130	10	4	509
TCONS_00026164	XLOC_017130	10	5	644
TCONS_00026168	XLOC_017130	10	2	339
TCONS_00026199	XLOC_017145	10	2	1407
TCONS_00026221	XLOC_017150	10	4	2676
TCONS_00026224	XLOC_017150	10	2	1133
TCONS_00026247	XLOC_017169	10	2	1591
TCONS_00026266	XLOC_017180	10	2	4102
TCONS_00026335	XLOC_017239	10	2	289
TCONS_00026365	XLOC_017266	10	2	1156
TCONS_00026396	XLOC_017296	10	3	3739
TCONS_00026465	XLOC_017357	10	3	3166
TCONS_00026466	XLOC_017357	10	3	5399
TCONS_00026467	XLOC_017357	10	4	5245
TCONS_00026472	XLOC_017357	10	2	3960
TCONS_00026473	XLOC_017357	10	3	3147
TCONS_00026476	XLOC_017357	10	2	2435
TCONS_00026495	XLOC_017357	10	3	4599
TCONS_00026539	XLOC_017415	10	5	4544
TCONS_00026540	XLOC_017415	10	6	4852
TCONS_00026541	XLOC_017415	10	4	1231
TCONS_00026542	XLOC_017415	10	2	877
TCONS_00026543	XLOC_017415	10	3	788
TCONS_00026544	XLOC_017415	10	4	930
TCONS_00026545	XLOC_017416	10	2	4081
TCONS_00026607	XLOC_017476	10	4	553
TCONS_00026608	XLOC_017476	10	4	782
TCONS_00026609	XLOC_017476	10	2	868
TCONS_00026619	XLOC_017485	10	2	419
TCONS_00026623	XLOC_017485	10	2	1256
TCONS_00026723	XLOC_017557	10	2	7807
TCONS_00026724	XLOC_017557	10	2	6629
TCONS_00026759	XLOC_017586	10	2	755
TCONS_00026807	XLOC_017631	10	2	2193
TCONS_00026811	XLOC_017634	10	3	400
TCONS_00026817	XLOC_017634	10	2	844
TCONS_00026818	XLOC_017634	10	2	911
TCONS_00026837	XLOC_017650	10	2	1466
TCONS_00026889	XLOC_017666	10	2	643
TCONS_00026893	XLOC_017670	10	2	630
TCONS_00026894	XLOC_017670	10	2	858
TCONS_00026895	XLOC_017670	10	2	1042
TCONS_00026896	XLOC_017670	10	2	768
TCONS_00026900	XLOC_017672	10	2	882
TCONS_00026908	XLOC_017677	10	2	708
TCONS_00027010	XLOC_017715	10	3	1907
TCONS_00027011	XLOC_017715	10	4	2016
TCONS_00027012	XLOC_017715	10	5	2206
TCONS_00027013	XLOC_017715	10	4	2129
TCONS_00027018	XLOC_017719	10	2	5652
TCONS_00027063	XLOC_017734	10	2	255
TCONS_00027280	XLOC_017802	10	2	9713
TCONS_00027281	XLOC_017802	10	3	7754
TCONS_00027282	XLOC_017802	10	2	9359
TCONS_00027383	XLOC_017859	10	3	911
TCONS_00027384	XLOC_017859	10	2	812
TCONS_00027413	XLOC_017876	10	2	12000
TCONS_00027416	XLOC_017877	10	2	8260
TCONS_00027418	XLOC_017878	10	3	1822
TCONS_00027511	XLOC_017925	10	2	2095
TCONS_00027595	XLOC_017986	10	2	7082
TCONS_00027602	XLOC_017989	10	3	452
TCONS_00027620	XLOC_018007	10	4	16656
TCONS_00027621	XLOC_018007	10	3	16625
TCONS_00027622	XLOC_018007	10	4	17015
TCONS_00027635	XLOC_018007	10	3	443
TCONS_00027636	XLOC_018007	10	3	379
TCONS_00027637	XLOC_018007	10	3	449
TCONS_00027753	XLOC_018071	10	3	1091
TCONS_00027796	XLOC_018077	10	2	1741
TCONS_00027799	XLOC_018080	10	3	1824
TCONS_00027801	XLOC_018080	10	3	859
TCONS_00027802	XLOC_018080	10	3	1348
TCONS_00027803	XLOC_018080	10	4	697
TCONS_00027807	XLOC_018085	10	3	564
TCONS_00027809	XLOC_018085	10	3	2237
TCONS_00027888	XLOC_018134	10	2	8706
TCONS_00027891	XLOC_018134	10	2	6456
TCONS_00027945	XLOC_018166	10	2	973
TCONS_00027946	XLOC_018166	10	3	1085
TCONS_00027947	XLOC_018166	10	2	907
TCONS_00028125	XLOC_018256	10	2	1488
TCONS_00028126	XLOC_018256	10	2	1898
TCONS_00028214	XLOC_018316	10	3	688
TCONS_00028217	XLOC_018316	10	2	4485
TCONS_00028242	XLOC_018335	10	2	583
TCONS_00028268	XLOC_018350	10	2	1375
TCONS_00028276	XLOC_018355	10	2	2526
TCONS_00028383	XLOC_018413	10	2	414
TCONS_00028427	XLOC_018456	10	3	418
TCONS_00028452	XLOC_018481	10	4	1380
TCONS_00028459	XLOC_018481	10	2	1047
TCONS_00028523	XLOC_018512	10	2	1506
TCONS_00028553	XLOC_018538	10	5	602
TCONS_00028554	XLOC_018538	10	4	513
TCONS_00028568	XLOC_018552	10	2	2721
TCONS_00028572	XLOC_018556	10	5	406
TCONS_00028577	XLOC_018561	10	2	357
TCONS_00028607	XLOC_018590	10	3	1229
TCONS_00028608	XLOC_018590	10	3	1149
TCONS_00028609	XLOC_018590	10	3	471
TCONS_00028610	XLOC_018590	10	2	1037
TCONS_00028652	XLOC_018612	10	2	378
TCONS_00028668	XLOC_018628	10	2	573
TCONS_00028703	XLOC_018663	10	3	686
TCONS_00028708	XLOC_018668	10	3	2520
TCONS_00028799	XLOC_018726	10	2	299
TCONS_00028861	XLOC_018771	10	2	718
TCONS_00028910	XLOC_018811	10	2	748
TCONS_00028922	XLOC_018816	10	3	848
TCONS_00028927	XLOC_018821	10	2	876
TCONS_00028933	XLOC_018826	10	4	1210
TCONS_00028934	XLOC_018826	10	5	1256
TCONS_00028935	XLOC_018826	10	4	959
TCONS_00028943	XLOC_018826	10	2	1630
TCONS_00028998	XLOC_018854	10	2	337
TCONS_00028999	XLOC_018854	10	2	298
TCONS_00029098	XLOC_018932	10	4	984
TCONS_00029099	XLOC_018932	10	3	6312
TCONS_00029100	XLOC_018932	10	2	7915
TCONS_00029101	XLOC_018932	10	4	872
TCONS_00029102	XLOC_018932	10	4	4230
TCONS_00029115	XLOC_018945	10	2	6101
TCONS_00029116	XLOC_018945	10	4	2700
TCONS_00029160	XLOC_018967	10	3	2213
TCONS_00029163	XLOC_018967	10	2	2859
TCONS_00029164	XLOC_018967	10	3	1350
TCONS_00029165	XLOC_018967	10	2	3141
TCONS_00029287	XLOC_019026	10	2	247
TCONS_00029472	XLOC_019118	10	3	915
TCONS_00029473	XLOC_019118	10	2	1133
TCONS_00029535	XLOC_019137	10	4	1722
TCONS_00029536	XLOC_019137	10	4	1931
TCONS_00029537	XLOC_019137	10	4	1503
TCONS_00029539	XLOC_019139	10	4	8201
TCONS_00029540	XLOC_019139	10	5	5647
TCONS_00029541	XLOC_019139	10	5	6483
TCONS_00029542	XLOC_019139	10	5	5388
TCONS_00029543	XLOC_019139	10	5	5424
TCONS_00029549	XLOC_019142	10	2	2257
TCONS_00029553	XLOC_019145	10	3	1768
TCONS_00029554	XLOC_019145	10	6	1008
TCONS_00029555	XLOC_019145	10	3	581
TCONS_00029573	XLOC_019145	10	3	1648
TCONS_00029574	XLOC_019145	10	4	1510
TCONS_00029584	XLOC_019145	10	3	1164
TCONS_00029636	XLOC_019193	10	2	944
TCONS_00029642	XLOC_019193	10	3	1206
TCONS_00029644	XLOC_019193	10	2	795
TCONS_00029801	XLOC_019312	10	2	2859
TCONS_00029849	XLOC_019329	10	2	7190
TCONS_00029880	XLOC_019343	10	2	507
TCONS_00029881	XLOC_019344	10	3	733
TCONS_00029928	XLOC_019366	10	3	1609
TCONS_00029952	XLOC_019387	10	2	1920
TCONS_00029977	XLOC_019412	10	2	5906
TCONS_00029981	XLOC_019416	10	2	4088
TCONS_00029982	XLOC_019416	10	3	4949
TCONS_00029984	XLOC_019417	10	2	5311
TCONS_00029988	XLOC_019419	10	4	551
TCONS_00029990	XLOC_019421	10	2	1954
TCONS_00030105	XLOC_019487	10	3	1100
TCONS_00030106	XLOC_019487	10	3	423
TCONS_00030245	XLOC_019585	10	2	682
TCONS_00030305	XLOC_019642	10	2	219
TCONS_00030344	XLOC_019659	10	3	11212
TCONS_00030346	XLOC_019659	10	2	10301
TCONS_00030348	XLOC_019659	10	2	4044
TCONS_00030349	XLOC_019659	10	2	6670
TCONS_00030350	XLOC_019659	10	2	6639
TCONS_00030351	XLOC_019661	10	2	592
TCONS_00030356	XLOC_019666	10	2	290
TCONS_00030357	XLOC_019666	10	5	810
TCONS_00030359	XLOC_019668	10	2	1811
TCONS_00030361	XLOC_019668	10	2	1953
TCONS_00030363	XLOC_019670	10	2	560
TCONS_00030364	XLOC_019670	10	2	565
TCONS_00030371	XLOC_019676	10	2	3216
TCONS_00030374	XLOC_019677	10	2	2023
TCONS_00030375	XLOC_019677	10	3	2517
TCONS_00030377	XLOC_019678	10	2	4909
TCONS_00030388	XLOC_019684	10	2	1120
TCONS_00030645	XLOC_019838	10	2	5232
TCONS_00030646	XLOC_019838	10	5	736
TCONS_00030647	XLOC_019838	10	4	694
TCONS_00030648	XLOC_019838	10	3	591
TCONS_00030665	XLOC_019838	10	3	2734
TCONS_00030683	XLOC_019865	10	3	525
TCONS_00030684	XLOC_019865	10	3	467
TCONS_00030685	XLOC_019865	10	2	320
TCONS_00030686	XLOC_019865	10	3	386
TCONS_00030692	XLOC_019870	10	3	7798
TCONS_00030693	XLOC_019870	10	3	11786
TCONS_00030694	XLOC_019870	10	3	7776
TCONS_00030702	XLOC_019876	10	3	1026
TCONS_00030728	XLOC_019893	10	5	1202
TCONS_00030730	XLOC_019893	10	3	1291
TCONS_00030772	XLOC_019911	10	2	1119
TCONS_00030773	XLOC_019911	10	3	1308
TCONS_00030774	XLOC_019911	10	3	1509
TCONS_00030775	XLOC_019911	10	2	1433
TCONS_00030776	XLOC_019911	10	3	1296
TCONS_00030777	XLOC_019911	10	4	1443
TCONS_00030788	XLOC_019920	10	3	602
TCONS_00030806	XLOC_019936	10	2	213
TCONS_00030807	XLOC_019937	10	2	330
TCONS_00030808	XLOC_019937	10	2	501
TCONS_00030858	XLOC_019986	10	2	411
TCONS_00031004	XLOC_020036	10	2	885
TCONS_00031145	XLOC_020078	10	2	9412
TCONS_00031155	XLOC_020080	10	3	2399
TCONS_00031184	XLOC_020088	10	2	3870
TCONS_00031222	XLOC_020101	10	2	670
TCONS_00031329	XLOC_020167	10	3	1308
TCONS_00031330	XLOC_020167	10	3	826
TCONS_00031331	XLOC_020167	10	3	1384
TCONS_00031333	XLOC_020169	10	5	808
TCONS_00031455	XLOC_020286	10	3	2588
TCONS_00031485	XLOC_020307	10	4	5263
TCONS_00031486	XLOC_020307	10	6	5263
TCONS_00031487	XLOC_020307	10	7	4592
TCONS_00031488	XLOC_020307	10	8	1466
TCONS_00031489	XLOC_020307	10	7	1325
TCONS_00031490	XLOC_020307	10	7	1375
TCONS_00031491	XLOC_020307	10	5	5151
TCONS_00031526	XLOC_020333	10	2	920
TCONS_00031542	XLOC_020307	10	2	1133
TCONS_00031553	XLOC_020356	10	2	6019
TCONS_00031649	XLOC_020403	10	3	4223
TCONS_00031654	XLOC_020403	10	3	2500
TCONS_00031765	XLOC_020486	10	3	1040
TCONS_00031888	XLOC_020546	10	2	2686
TCONS_00031889	XLOC_020547	10	2	922
TCONS_00031947	XLOC_020568	10	2	377
TCONS_00032060	XLOC_020635	10	2	7115
TCONS_00032061	XLOC_020635	10	3	5931
TCONS_00032062	XLOC_020635	10	3	6308
TCONS_00032063	XLOC_020635	10	3	5850
TCONS_00032069	XLOC_020641	10	2	773
TCONS_00032201	XLOC_020683	10	2	1904
TCONS_00032220	XLOC_020685	10	2	1601
TCONS_00032285	XLOC_020697	10	2	1770
TCONS_00032286	XLOC_020697	10	2	1670
TCONS_00032287	XLOC_020697	10	2	1847
TCONS_00032288	XLOC_020697	10	2	1886
TCONS_00032401	XLOC_020741	10	2	2469
TCONS_00032402	XLOC_020741	10	2	3158
TCONS_00032403	XLOC_020741	10	2	2553
TCONS_00032451	XLOC_020758	10	3	1771
TCONS_00032453	XLOC_020758	10	3	1575
TCONS_00032455	XLOC_020758	10	2	1604
TCONS_00032482	XLOC_020771	10	3	894
TCONS_00032483	XLOC_020771	10	3	858
TCONS_00032484	XLOC_020771	10	3	856
TCONS_00032505	XLOC_020780	10	4	947
TCONS_00032506	XLOC_020780	10	2	677
TCONS_00032512	XLOC_020783	10	3	410
TCONS_00032515	XLOC_020783	10	3	704
TCONS_00032527	XLOC_020792	10	2	627
TCONS_00032628	XLOC_020851	10	2	2154
TCONS_00032629	XLOC_020852	10	5	1042
TCONS_00032630	XLOC_020852	10	3	1921
TCONS_00032633	XLOC_020852	10	2	4731
TCONS_00032634	XLOC_020852	10	2	2457
TCONS_00032690	XLOC_020871	10	3	1365
TCONS_00032704	XLOC_020880	10	2	3857
TCONS_00032739	XLOC_020896	10	3	3143
TCONS_00032740	XLOC_020896	10	3	4599
TCONS_00032741	XLOC_020896	10	2	5586
TCONS_00032945	XLOC_020995	10	3	593
TCONS_00032971	XLOC_021008	10	2	397
TCONS_00032999	XLOC_021028	10	3	632
TCONS_00033000	XLOC_021028	10	4	723
TCONS_00033002	XLOC_021028	10	2	899
TCONS_00033028	XLOC_021034	10	2	737
TCONS_00033056	XLOC_021049	10	3	517
TCONS_00033113	XLOC_021079	10	2	2459
TCONS_00033182	XLOC_021115	10	5	702
TCONS_00033270	XLOC_021143	10	2	473
TCONS_00033284	XLOC_021143	10	3	1047
TCONS_00033345	XLOC_021232	10	2	4257
TCONS_00033370	XLOC_021252	10	2	2117
TCONS_00033380	XLOC_021260	10	2	741
TCONS_00033425	XLOC_021278	10	3	2214
TCONS_00033439	XLOC_021301	10	2	412
TCONS_00033469	XLOC_021314	10	2	1090
TCONS_00033491	XLOC_021327	10	2	4149
TCONS_00033492	XLOC_021327	10	2	3626
TCONS_00033494	XLOC_021329	10	3	369
TCONS_00033497	XLOC_021329	10	2	3460
TCONS_00033504	XLOC_021337	10	2	2125
TCONS_00033517	XLOC_021348	10	2	2979
TCONS_00033527	XLOC_021354	10	2	1155
TCONS_00033528	XLOC_021354	10	2	1256
TCONS_00033529	XLOC_021354	10	2	1183
TCONS_00033530	XLOC_021354	10	2	1207
TCONS_00033541	XLOC_021364	10	2	357
TCONS_00033551	XLOC_021372	10	2	623
TCONS_00033574	XLOC_021394	10	2	1604
TCONS_00033588	XLOC_021401	10	2	747
TCONS_00033608	XLOC_021418	10	2	608
TCONS_00033624	XLOC_021433	10	2	10696
TCONS_00033655	XLOC_021434	10	3	4021
TCONS_00033656	XLOC_021434	10	3	4000
TCONS_00033657	XLOC_021434	10	3	4040
TCONS_00033684	XLOC_021461	10	2	737
TCONS_00033698	XLOC_021474	10	2	647
TCONS_00033736	XLOC_021507	10	2	3495
TCONS_00033741	XLOC_021507	10	2	1051
TCONS_00033840	XLOC_021594	10	2	823
TCONS_00033993	XLOC_021738	11	2	896
TCONS_00034033	XLOC_021746	11	2	354
TCONS_00034047	XLOC_021771	11	6	14633
TCONS_00034048	XLOC_021771	11	5	14148
TCONS_00034049	XLOC_021771	11	5	17678
TCONS_00034050	XLOC_021771	11	5	13763
TCONS_00034051	XLOC_021771	11	5	15296
TCONS_00034052	XLOC_021771	11	6	15490
TCONS_00034053	XLOC_021771	11	5	13690
TCONS_00034054	XLOC_021771	11	5	14402
TCONS_00034057	XLOC_021774	11	2	683
TCONS_00034058	XLOC_021774	11	4	1435
TCONS_00034059	XLOC_021774	11	3	1246
TCONS_00034060	XLOC_021774	11	3	362
TCONS_00034061	XLOC_021774	11	3	355
TCONS_00034062	XLOC_021774	11	3	696
TCONS_00034063	XLOC_021774	11	2	933
TCONS_00034065	XLOC_021774	11	3	5131
TCONS_00034084	XLOC_021774	11	3	2003
TCONS_00034085	XLOC_021774	11	2	768
TCONS_00034086	XLOC_021774	11	2	644
TCONS_00034099	XLOC_021774	11	2	726
TCONS_00034105	XLOC_021809	11	2	3823
TCONS_00034107	XLOC_021811	11	2	2585
TCONS_00034146	XLOC_021847	11	2	13114
TCONS_00034147	XLOC_021847	11	2	12616
TCONS_00034148	XLOC_021847	11	2	12847
TCONS_00034163	XLOC_021849	11	2	522
TCONS_00034234	XLOC_021872	11	3	1463
TCONS_00034235	XLOC_021872	11	2	3019
TCONS_00034236	XLOC_021872	11	3	1052
TCONS_00034238	XLOC_021872	11	3	9394
TCONS_00034239	XLOC_021872	11	2	10044
TCONS_00034266	XLOC_021880	11	2	2660
TCONS_00034391	XLOC_021910	11	2	3175
TCONS_00034527	XLOC_021983	11	2	5411
TCONS_00034534	XLOC_021990	11	3	335
TCONS_00034535	XLOC_021990	11	3	853
TCONS_00034537	XLOC_021990	11	3	916
TCONS_00034539	XLOC_021990	11	4	879
TCONS_00034540	XLOC_021990	11	5	1367
TCONS_00034541	XLOC_021990	11	4	1342
TCONS_00034542	XLOC_021990	11	4	1383
TCONS_00034550	XLOC_021997	11	2	16835
TCONS_00034728	XLOC_022068	11	2	2132
TCONS_00034729	XLOC_022068	11	3	2189
TCONS_00034759	XLOC_022086	11	2	1243
TCONS_00034760	XLOC_022086	11	2	1390
TCONS_00034761	XLOC_022086	11	2	832
TCONS_00034769	XLOC_022093	11	2	947
TCONS_00034772	XLOC_022095	11	4	981
TCONS_00034773	XLOC_022095	11	2	1042
TCONS_00034774	XLOC_022095	11	2	807
TCONS_00034806	XLOC_022119	11	2	1652
TCONS_00034837	XLOC_022137	11	2	659
TCONS_00035033	XLOC_022204	11	2	7396
TCONS_00035438	XLOC_022410	11	2	2131
TCONS_00035497	XLOC_022474	11	4	2959
TCONS_00035539	XLOC_022474	11	3	1634
TCONS_00035540	XLOC_022474	11	3	625
TCONS_00035552	XLOC_022474	11	4	3239
TCONS_00035613	XLOC_022474	11	2	2938
TCONS_00035689	XLOC_022658	11	4	630
TCONS_00035696	XLOC_022665	11	2	1360
TCONS_00035738	XLOC_022675	11	2	596
TCONS_00035756	XLOC_022684	11	4	625
TCONS_00035761	XLOC_022684	11	3	933
TCONS_00035762	XLOC_022684	11	4	502
TCONS_00035803	XLOC_022726	11	4	3440
TCONS_00035804	XLOC_022726	11	4	436
TCONS_00035805	XLOC_022726	11	4	3373
TCONS_00035840	XLOC_022748	11	2	1267
TCONS_00035841	XLOC_022748	11	2	1169
TCONS_00035857	XLOC_022761	11	2	1470
TCONS_00035894	XLOC_022767	11	2	4139
TCONS_00035916	XLOC_022795	11	7	1565
TCONS_00035917	XLOC_022795	11	6	1508
TCONS_00035918	XLOC_022795	11	5	1334
TCONS_00035919	XLOC_022795	11	5	1095
TCONS_00035922	XLOC_022795	11	6	1494
TCONS_00035923	XLOC_022795	11	7	1665
TCONS_00035924	XLOC_022795	11	6	1207
TCONS_00035925	XLOC_022795	11	5	12202
TCONS_00035937	XLOC_022795	11	2	448
TCONS_00035963	XLOC_022795	11	3	984
TCONS_00035985	XLOC_022847	11	3	1086
TCONS_00035986	XLOC_022847	11	3	717
TCONS_00036068	XLOC_022921	11	3	3629
TCONS_00036069	XLOC_022921	11	3	2914
TCONS_00036071	XLOC_022921	11	2	3846
TCONS_00036072	XLOC_022921	11	3	3015
TCONS_00036135	XLOC_022945	11	3	1515
TCONS_00036136	XLOC_022945	11	3	1986
TCONS_00036137	XLOC_022945	11	3	1680
TCONS_00036162	XLOC_022963	11	2	954
TCONS_00036163	XLOC_022963	11	4	11701
TCONS_00036164	XLOC_022963	11	3	12733
TCONS_00036165	XLOC_022963	11	4	12154
TCONS_00036166	XLOC_022963	11	3	13473
TCONS_00036167	XLOC_022963	11	4	11612
TCONS_00036170	XLOC_022963	11	3	6048
TCONS_00036230	XLOC_022990	11	2	1198
TCONS_00036271	XLOC_022989	11	2	1892
TCONS_00036383	XLOC_023099	11	4	767
TCONS_00036384	XLOC_023099	11	3	729
TCONS_00036385	XLOC_023099	11	3	438
TCONS_00036415	XLOC_023125	11	2	1242
TCONS_00036444	XLOC_023154	11	2	1313
TCONS_00036537	XLOC_023246	11	2	1251
TCONS_00036637	XLOC_023316	11	2	1295
TCONS_00036652	XLOC_023325	11	3	3471
TCONS_00036657	XLOC_023328	11	2	607
TCONS_00036682	XLOC_023339	11	2	3548
TCONS_00036684	XLOC_023339	11	2	3568
TCONS_00036694	XLOC_023349	11	2	2602
TCONS_00036709	XLOC_023360	11	3	4603
TCONS_00036723	XLOC_023366	11	2	8286
TCONS_00036752	XLOC_023375	11	2	675
TCONS_00036898	XLOC_023520	11	3	668
TCONS_00036899	XLOC_023520	11	3	636
TCONS_00036901	XLOC_023522	11	2	487
TCONS_00036939	XLOC_023545	11	2	300
TCONS_00036996	XLOC_023599	11	2	2020
TCONS_00037058	XLOC_023595	11	2	6536
TCONS_00037073	XLOC_023665	11	2	978
TCONS_00037074	XLOC_023665	11	3	721
TCONS_00037202	XLOC_023764	11	2	1298
TCONS_00037203	XLOC_023764	11	4	1121
TCONS_00037223	XLOC_023776	11	2	1899
TCONS_00037369	XLOC_023897	11	6	5151
TCONS_00037370	XLOC_023897	11	4	3161
TCONS_00037371	XLOC_023897	11	5	3734
TCONS_00037375	XLOC_023897	11	2	3276
TCONS_00037482	XLOC_024008	11	2	984
TCONS_00037525	XLOC_024047	11	4	741
TCONS_00037556	XLOC_024078	11	3	715
TCONS_00037562	XLOC_024084	11	2	1409
TCONS_00037564	XLOC_024086	11	2	1727
TCONS_00037565	XLOC_024086	11	3	2778
TCONS_00037566	XLOC_024086	11	3	1979
TCONS_00037689	XLOC_024135	11	2	343
TCONS_00037696	XLOC_024140	11	5	688
TCONS_00037697	XLOC_024140	11	3	1336
TCONS_00037698	XLOC_024140	11	3	1412
TCONS_00037701	XLOC_024143	11	3	463
TCONS_00037708	XLOC_024148	11	4	3705
TCONS_00037709	XLOC_024148	11	4	3828
TCONS_00037710	XLOC_024148	11	3	794
TCONS_00037711	XLOC_024148	11	3	2474
TCONS_00037731	XLOC_024157	11	2	621
TCONS_00037765	XLOC_024173	11	2	729
TCONS_00037963	XLOC_024287	11	3	472
TCONS_00037964	XLOC_024287	11	2	2885
TCONS_00038091	XLOC_024375	11	2	3239
TCONS_00038093	XLOC_024375	11	3	705
TCONS_00038094	XLOC_024375	11	3	688
TCONS_00038120	XLOC_024390	11	3	723
TCONS_00038121	XLOC_024390	11	4	848
TCONS_00038122	XLOC_024390	11	3	345
TCONS_00038123	XLOC_024390	11	4	574
TCONS_00038124	XLOC_024390	11	5	728
TCONS_00038125	XLOC_024390	11	3	308
TCONS_00038126	XLOC_024390	11	2	1835
TCONS_00038136	XLOC_024390	11	4	528
TCONS_00038187	XLOC_024448	11	2	872
TCONS_00038193	XLOC_024448	11	2	1021
TCONS_00038232	XLOC_024476	11	2	6473
TCONS_00038244	XLOC_024486	11	2	8875
TCONS_00038257	XLOC_024499	11	2	1013
TCONS_00038342	XLOC_024578	11	2	951
TCONS_00038579	XLOC_024811	11	3	893
TCONS_00038580	XLOC_024811	11	2	787
TCONS_00038586	XLOC_024811	11	4	1678
TCONS_00038587	XLOC_024811	11	2	1096
TCONS_00038588	XLOC_024811	11	4	1502
TCONS_00038589	XLOC_024811	11	5	1147
TCONS_00038617	XLOC_024837	11	2	5493
TCONS_00038618	XLOC_024837	11	2	5492
TCONS_00038620	XLOC_024837	11	2	5768
TCONS_00038703	XLOC_024905	11	2	3455
TCONS_00038707	XLOC_024898	11	3	2059
TCONS_00038708	XLOC_024898	11	2	1620
TCONS_00038832	XLOC_024977	11	2	1210
TCONS_00038842	XLOC_024977	11	2	1119
TCONS_00038870	XLOC_025010	11	2	1991
TCONS_00038872	XLOC_025010	11	2	3295
TCONS_00038907	XLOC_025034	11	5	2403
TCONS_00038910	XLOC_025034	11	5	950
TCONS_00038912	XLOC_025038	11	2	3308
TCONS_00038914	XLOC_025038	11	2	3476
TCONS_00038954	XLOC_025063	11	3	1797
TCONS_00038955	XLOC_025063	11	4	1699
TCONS_00038957	XLOC_025063	11	4	866
TCONS_00038974	XLOC_025069	11	3	930
TCONS_00038977	XLOC_025069	11	3	636
TCONS_00038981	XLOC_025075	11	3	955
TCONS_00038986	XLOC_025080	11	5	2188
TCONS_00038990	XLOC_025084	11	3	255
TCONS_00039013	XLOC_025105	11	2	984
TCONS_00039014	XLOC_025105	11	2	1335
TCONS_00039018	XLOC_025108	11	2	852
TCONS_00039019	XLOC_025108	11	3	475
TCONS_00039075	XLOC_025151	11	4	16869
TCONS_00039076	XLOC_025151	11	3	11091
TCONS_00039077	XLOC_025151	11	4	8485
TCONS_00039078	XLOC_025151	11	4	12683
TCONS_00039079	XLOC_025151	11	2	6279
TCONS_00039080	XLOC_025151	11	2	12932
TCONS_00039104	XLOC_025164	11	3	5696
TCONS_00039105	XLOC_025164	11	3	1298
TCONS_00039206	XLOC_025210	11	3	1473
TCONS_00039208	XLOC_025210	11	2	1236
TCONS_00039263	XLOC_025238	11	4	4221
TCONS_00039304	XLOC_025255	11	5	615
TCONS_00039325	XLOC_025255	11	4	10599
TCONS_00039342	XLOC_025255	11	3	4040
TCONS_00039345	XLOC_025290	11	3	568
TCONS_00039445	XLOC_025387	11	2	1075
TCONS_00039502	XLOC_025444	11	2	356
TCONS_00039580	XLOC_025490	11	2	2878
TCONS_00039664	XLOC_025509	11	2	1722
TCONS_00039687	XLOC_025525	11	2	4545
TCONS_00039688	XLOC_025525	11	3	3829
TCONS_00039689	XLOC_025526	11	2	896
TCONS_00039697	XLOC_025532	11	3	4326
TCONS_00039698	XLOC_025532	11	4	3400
TCONS_00039890	XLOC_025620	11	2	535
TCONS_00039961	XLOC_025627	11	3	4010
TCONS_00040028	XLOC_025677	11	2	9456
TCONS_00040029	XLOC_025677	11	4	11396
TCONS_00040030	XLOC_025677	11	4	11541
TCONS_00040042	XLOC_025687	11	2	1337
TCONS_00040049	XLOC_025693	11	4	353
TCONS_00040069	XLOC_025712	11	3	514
TCONS_00040078	XLOC_025712	11	2	332
TCONS_00040089	XLOC_025727	11	3	1826
TCONS_00040145	XLOC_025759	11	2	1434
TCONS_00040146	XLOC_025759	11	2	1642
TCONS_00040167	XLOC_025773	11	2	433
TCONS_00040190	XLOC_025789	11	4	2466
TCONS_00040191	XLOC_025789	11	2	3646
TCONS_00040208	XLOC_025799	11	2	528
TCONS_00040265	XLOC_025833	11	2	1648
TCONS_00040281	XLOC_025840	11	2	719
TCONS_00040282	XLOC_025840	11	2	573
TCONS_00040311	XLOC_025858	11	3	16658
TCONS_00040326	XLOC_025858	11	4	1015
TCONS_00040327	XLOC_025858	11	3	585
TCONS_00040333	XLOC_025868	11	3	646
TCONS_00040360	XLOC_025880	11	2	2358
TCONS_00040365	XLOC_025885	11	3	223
TCONS_00040374	XLOC_025887	11	2	4021
TCONS_00040382	XLOC_025890	11	2	2710
TCONS_00040401	XLOC_025895	11	3	8231
TCONS_00040433	XLOC_025922	11	3	3638
TCONS_00040434	XLOC_025922	11	2	4672
TCONS_00040435	XLOC_025922	11	3	3049
TCONS_00040437	XLOC_025922	11	3	3683
TCONS_00040438	XLOC_025922	11	3	3107
TCONS_00040460	XLOC_025927	11	3	765
TCONS_00040481	XLOC_025953	11	2	776
TCONS_00040482	XLOC_025953	11	3	468
TCONS_00040489	XLOC_025955	11	2	916
TCONS_00040517	XLOC_025981	11	2	1614
TCONS_00040518	XLOC_025981	11	2	4539
TCONS_00040531	XLOC_025991	11	2	390
TCONS_00040532	XLOC_025991	11	2	369
TCONS_00040547	XLOC_026000	11	3	1810
TCONS_00040548	XLOC_026000	11	3	1938
TCONS_00040549	XLOC_026000	11	2	2258
TCONS_00040557	XLOC_026004	11	2	3184
TCONS_00040560	XLOC_026007	11	3	943
TCONS_00040561	XLOC_026007	11	4	1089
TCONS_00040562	XLOC_026007	11	3	790
TCONS_00040563	XLOC_026007	11	4	1030
TCONS_00040564	XLOC_026007	11	3	883
TCONS_00040565	XLOC_026007	11	4	933
TCONS_00040566	XLOC_026007	11	2	709
TCONS_00040569	XLOC_026010	11	2	2836
TCONS_00040573	XLOC_026010	11	2	3100
TCONS_00040574	XLOC_026010	11	2	3433
TCONS_00040575	XLOC_026010	11	2	2870
TCONS_00040652	XLOC_026047	11	2	1436
TCONS_00040657	XLOC_026050	11	2	1854
TCONS_00040676	XLOC_026061	11	2	4152
TCONS_00040719	XLOC_026087	11	4	21321
TCONS_00040720	XLOC_026087	11	5	581
TCONS_00040721	XLOC_026087	11	2	4484
TCONS_00040722	XLOC_026087	11	3	21186
TCONS_00040723	XLOC_026087	11	3	4564
TCONS_00040726	XLOC_026087	11	4	20923
TCONS_00040742	XLOC_026101	11	2	10862
TCONS_00040744	XLOC_026101	11	3	2443
TCONS_00040758	XLOC_026111	11	4	837
TCONS_00040768	XLOC_026121	11	3	1818
TCONS_00040769	XLOC_026121	11	4	2039
TCONS_00040770	XLOC_026121	11	4	1851
TCONS_00040771	XLOC_026121	11	5	1265
TCONS_00040772	XLOC_026121	11	5	1116
TCONS_00040773	XLOC_026121	11	4	481
TCONS_00040774	XLOC_026121	11	3	1570
TCONS_00040775	XLOC_026121	11	3	336
TCONS_00040776	XLOC_026121	11	4	958
TCONS_00040798	XLOC_026142	11	2	3736
TCONS_00040801	XLOC_026121	11	3	835
TCONS_00040811	XLOC_026147	11	3	1892
TCONS_00040827	XLOC_026151	11	3	1280
TCONS_00040828	XLOC_026151	11	3	529
TCONS_00040840	XLOC_026160	11	4	591
TCONS_00040841	XLOC_026160	11	4	2094
TCONS_00040842	XLOC_026160	11	4	2228
TCONS_00040843	XLOC_026160	11	4	1900
TCONS_00040844	XLOC_026160	11	3	542
TCONS_00040846	XLOC_026160	11	2	1630
TCONS_00040865	XLOC_026178	11	2	2338
TCONS_00040866	XLOC_026178	11	2	3916
TCONS_00040906	XLOC_026193	11	5	4167
TCONS_00040907	XLOC_026193	11	5	3222
TCONS_00040908	XLOC_026193	11	3	2235
TCONS_00040909	XLOC_026193	11	2	2814
TCONS_00040911	XLOC_026193	11	2	2738
TCONS_00040991	XLOC_026239	11	2	1109
TCONS_00040993	XLOC_026239	11	2	463
TCONS_00040995	XLOC_026239	11	2	1208
TCONS_00041012	XLOC_026247	11	2	3726
TCONS_00041069	XLOC_026276	11	3	489
TCONS_00041070	XLOC_026276	11	2	433
TCONS_00041103	XLOC_026286	11	2	676
TCONS_00041109	XLOC_026289	11	2	411
TCONS_00041122	XLOC_026292	11	3	1275
TCONS_00041123	XLOC_026292	11	3	873
TCONS_00041124	XLOC_026292	11	3	890
TCONS_00041126	XLOC_026294	11	6	3064
TCONS_00041127	XLOC_026294	11	6	2958
TCONS_00041129	XLOC_026294	11	6	2915
TCONS_00041161	XLOC_026306	11	3	354
TCONS_00041163	XLOC_026306	11	4	1104
TCONS_00041172	XLOC_026310	11	2	982
TCONS_00041283	XLOC_026354	11	2	2301
TCONS_00041327	XLOC_026373	11	2	354
TCONS_00041452	XLOC_026405	11	2	1134
TCONS_00041494	XLOC_026420	11	2	383
TCONS_00041511	XLOC_026429	11	2	1842
TCONS_00041513	XLOC_026429	11	2	1655
TCONS_00041527	XLOC_026442	11	2	2324
TCONS_00041528	XLOC_026442	11	2	3872
TCONS_00041529	XLOC_026442	11	3	4058
TCONS_00041530	XLOC_026442	11	3	4052
TCONS_00041531	XLOC_026442	11	3	1646
TCONS_00041543	XLOC_026451	11	4	2129
TCONS_00041544	XLOC_026451	11	3	1008
TCONS_00041545	XLOC_026451	11	3	628
TCONS_00041546	XLOC_026451	11	4	3747
TCONS_00041547	XLOC_026451	11	4	1369
TCONS_00041548	XLOC_026451	11	3	1635
TCONS_00041549	XLOC_026451	11	3	1666
TCONS_00041552	XLOC_026451	11	4	1593
TCONS_00041553	XLOC_026451	11	3	1165
TCONS_00041554	XLOC_026451	11	4	2281
TCONS_00041571	XLOC_026467	11	2	2329
TCONS_00041574	XLOC_026469	11	2	1544
TCONS_00041575	XLOC_026469	11	3	5270
TCONS_00041576	XLOC_026469	11	3	5273
TCONS_00041586	XLOC_026469	11	2	5387
TCONS_00041588	XLOC_026477	11	2	7847
TCONS_00041589	XLOC_026477	11	3	7063
TCONS_00041590	XLOC_026477	11	3	5364
TCONS_00041591	XLOC_026477	11	4	4628
TCONS_00041592	XLOC_026477	11	3	5412
TCONS_00041593	XLOC_026477	11	2	7155
TCONS_00041594	XLOC_026477	11	4	4732
TCONS_00041595	XLOC_026477	11	4	5471
TCONS_00041596	XLOC_026477	11	2	7898
TCONS_00041597	XLOC_026477	11	3	5415
TCONS_00041598	XLOC_026477	11	2	7901
TCONS_00041599	XLOC_026477	11	3	5405
TCONS_00041601	XLOC_026479	11	3	8650
TCONS_00041603	XLOC_026479	11	2	10641
TCONS_00041604	XLOC_026479	11	5	14634
TCONS_00041605	XLOC_026479	11	5	12413
TCONS_00041606	XLOC_026479	11	6	11727
TCONS_00041607	XLOC_026479	11	8	6619
TCONS_00041608	XLOC_026479	11	2	5261
TCONS_00041807	XLOC_026523	11	3	2769
TCONS_00041809	XLOC_026523	11	3	1150
TCONS_00041880	XLOC_026546	11	2	1480
TCONS_00041881	XLOC_026546	11	2	850
TCONS_00041894	XLOC_026556	11	3	1647
TCONS_00041895	XLOC_026556	11	3	1671
TCONS_00042010	XLOC_026603	11	2	216
TCONS_00042017	XLOC_026610	11	2	1513
TCONS_00042028	XLOC_026616	11	2	2135
TCONS_00042036	XLOC_026623	11	2	1965
TCONS_00042037	XLOC_026623	11	3	1290
TCONS_00042115	XLOC_026664	11	4	1088
TCONS_00042152	XLOC_026676	11	2	1319
TCONS_00042162	XLOC_026678	11	3	1853
TCONS_00042163	XLOC_026679	11	3	4867
TCONS_00042165	XLOC_026679	11	3	4806
TCONS_00042212	XLOC_026711	11	3	2024
TCONS_00042216	XLOC_026713	11	2	776
TCONS_00042231	XLOC_026725	11	3	2989
TCONS_00042232	XLOC_026725	11	2	3294
TCONS_00042233	XLOC_026725	11	4	2708
TCONS_00042234	XLOC_026725	11	2	4325
TCONS_00042236	XLOC_026725	11	2	4075
TCONS_00042237	XLOC_026725	11	2	3284
TCONS_00042245	XLOC_026733	11	2	946
TCONS_00042248	XLOC_026736	11	4	1004
TCONS_00042257	XLOC_026744	11	2	4186
TCONS_00042259	XLOC_026745	11	2	1838
TCONS_00042327	XLOC_026753	11	4	1221
TCONS_00042328	XLOC_026753	11	5	647
TCONS_00042329	XLOC_026753	11	4	535
TCONS_00042330	XLOC_026753	11	4	1214
TCONS_00042331	XLOC_026753	11	4	550
TCONS_00042332	XLOC_026753	11	2	835
TCONS_00042333	XLOC_026753	11	4	1189
TCONS_00042339	XLOC_026758	11	2	1234
TCONS_00042370	XLOC_026771	11	2	367
TCONS_00042391	XLOC_026773	11	3	1438
TCONS_00042392	XLOC_026773	11	3	1308
TCONS_00042393	XLOC_026773	11	2	1811
TCONS_00042394	XLOC_026773	11	3	1147
TCONS_00042484	XLOC_026812	11	3	5352
TCONS_00042485	XLOC_026812	11	2	4864
TCONS_00042495	XLOC_026821	11	2	2547
TCONS_00042497	XLOC_026823	11	2	906
TCONS_00042655	XLOC_026918	11	2	3978
TCONS_00042686	XLOC_026927	11	2	5033
TCONS_00042781	XLOC_026945	11	2	1659
TCONS_00042784	XLOC_026945	11	2	6254
TCONS_00042785	XLOC_026945	11	2	6150
TCONS_00042910	XLOC_027014	11	2	627
TCONS_00043010	XLOC_027059	11	2	2088
TCONS_00043034	XLOC_027075	11	2	354
TCONS_00043078	XLOC_027087	11	2	4877
TCONS_00043082	XLOC_027096	11	2	472
TCONS_00043106	XLOC_027107	11	3	1982
TCONS_00043107	XLOC_027107	11	3	1072
TCONS_00043117	XLOC_027117	11	2	450
TCONS_00043165	XLOC_027146	11	2	2238
TCONS_00043234	XLOC_027182	11	7	3340
TCONS_00043235	XLOC_027182	11	5	3400
TCONS_00043236	XLOC_027182	11	5	3401
TCONS_00043237	XLOC_027182	11	9	5011
TCONS_00043240	XLOC_027182	11	9	4983
TCONS_00043241	XLOC_027182	11	9	4987
TCONS_00043243	XLOC_027182	11	9	3614
TCONS_00043275	XLOC_027196	11	2	2224
TCONS_00043561	XLOC_027308	11	3	1467
TCONS_00043562	XLOC_027308	11	2	1179
TCONS_00043563	XLOC_027308	11	2	5273
TCONS_00043565	XLOC_027308	11	2	5316
TCONS_00043566	XLOC_027308	11	2	1656
TCONS_00043567	XLOC_027308	11	2	5278
TCONS_00043568	XLOC_027308	11	3	1424
TCONS_00043569	XLOC_027309	11	2	2379
TCONS_00043571	XLOC_027310	11	3	5401
TCONS_00043572	XLOC_027310	11	2	706
TCONS_00043638	XLOC_027345	11	4	4441
TCONS_00043639	XLOC_027345	11	4	4223
TCONS_00043641	XLOC_027345	11	5	1824
TCONS_00043642	XLOC_027345	11	3	1613
TCONS_00043643	XLOC_027345	11	4	2194
TCONS_00043644	XLOC_027345	11	4	1976
TCONS_00043645	XLOC_027345	11	2	2365
TCONS_00043646	XLOC_027345	11	2	1958
TCONS_00043647	XLOC_027345	11	4	2766
TCONS_00043648	XLOC_027345	11	3	2185
TCONS_00043654	XLOC_027345	11	2	853
TCONS_00043699	XLOC_027392	11	3	2001
TCONS_00043700	XLOC_027392	11	3	2375
TCONS_00043722	XLOC_027413	11	2	627
TCONS_00043808	XLOC_027452	11	3	911
TCONS_00043809	XLOC_027452	11	3	416
TCONS_00043832	XLOC_027472	11	3	1766
TCONS_00043833	XLOC_027472	11	4	1885
TCONS_00043838	XLOC_027477	11	2	200
TCONS_00043859	XLOC_027489	11	4	1207
TCONS_00043861	XLOC_027489	11	4	1245
TCONS_00043862	XLOC_027489	11	3	1094
TCONS_00043864	XLOC_027489	11	3	1131
TCONS_00043874	XLOC_027489	11	2	1222
TCONS_00043930	XLOC_027525	11	2	1025
TCONS_00043970	XLOC_027555	11	2	2491
TCONS_00044012	XLOC_027568	11	3	778
TCONS_00044025	XLOC_027581	11	2	1801
TCONS_00044034	XLOC_027583	11	2	326
TCONS_00044065	XLOC_027600	11	2	1792
TCONS_00044098	XLOC_027633	11	2	2118
TCONS_00044190	XLOC_027706	11	2	1527
TCONS_00044264	XLOC_027774	11	2	15543
TCONS_00044280	XLOC_027777	11	3	3404
TCONS_00044308	XLOC_027794	11	2	1216
TCONS_00044312	XLOC_027798	11	2	756
TCONS_00044319	XLOC_027804	11	2	975
TCONS_00044357	XLOC_027815	11	2	2149
TCONS_00044358	XLOC_027815	11	4	2057
TCONS_00044361	XLOC_027815	11	4	2215
TCONS_00044362	XLOC_027815	11	4	2259
TCONS_00044367	XLOC_027819	11	2	5129
TCONS_00044368	XLOC_027819	11	2	2698
TCONS_00044383	XLOC_027822	11	2	1287
TCONS_00044393	XLOC_027827	11	2	1484
TCONS_00044394	XLOC_027828	11	2	364
TCONS_00044395	XLOC_027829	11	2	770
TCONS_00044404	XLOC_027834	11	4	3619
TCONS_00044405	XLOC_027834	11	5	5476
TCONS_00044406	XLOC_027834	11	5	3725
TCONS_00044407	XLOC_027834	11	4	4442
TCONS_00044408	XLOC_027834	11	3	4089
TCONS_00044409	XLOC_027834	11	3	3673
TCONS_00044410	XLOC_027834	11	4	2312
TCONS_00044411	XLOC_027834	11	2	982
TCONS_00044443	XLOC_027853	11	2	5443
TCONS_00044450	XLOC_027859	11	2	577
TCONS_00044453	XLOC_027860	11	3	917
TCONS_00044455	XLOC_027860	11	3	663
TCONS_00044459	XLOC_027860	11	2	2870
TCONS_00044460	XLOC_027864	11	2	1178
TCONS_00044510	XLOC_027881	11	2	6132
TCONS_00044511	XLOC_027881	11	3	7724
TCONS_00044520	XLOC_027903	11	2	26084
TCONS_00044527	XLOC_027909	11	3	562
TCONS_00044530	XLOC_027911	11	2	388
TCONS_00044531	XLOC_027911	11	2	7571
TCONS_00044573	XLOC_027933	11	4	611
TCONS_00044580	XLOC_027933	11	4	1072
TCONS_00044585	XLOC_027933	11	2	817
TCONS_00044600	XLOC_027954	11	3	1330
TCONS_00044638	XLOC_027975	11	3	718
TCONS_00044673	XLOC_028009	11	2	2359
TCONS_00044674	XLOC_028009	11	2	843
TCONS_00044687	XLOC_028014	11	2	212
TCONS_00044688	XLOC_028015	11	2	526
TCONS_00044689	XLOC_028015	11	2	417
TCONS_00044690	XLOC_028015	11	3	680
TCONS_00044691	XLOC_028015	11	2	1458
TCONS_00044693	XLOC_028015	11	2	1393
TCONS_00044695	XLOC_028017	11	4	875
TCONS_00044696	XLOC_028017	11	2	935
TCONS_00044697	XLOC_028017	11	4	1566
TCONS_00044698	XLOC_028017	11	2	2516
TCONS_00044719	XLOC_028031	11	3	732
TCONS_00044720	XLOC_028031	11	3	963
TCONS_00044875	XLOC_028162	11	2	801
TCONS_00044876	XLOC_028162	11	4	757
[truncated: 14,932 more rows]
