# Supplementary material for: RNA-Seq Implies Divergent Regulation Patterns of LincRNA on Spermatogenesis and Testis Growth in Goats
Source: Animals (Basel). 2021 Feb 26;11(3):625. doi: 10.3390/ani11030625 (PMC7996862; doi:10.3390/ani11030625)
Supplement: Supplementary file 1 [file animals-11-00625-s001.zip › Table S2.xlsx]

## Sheet: Table S2
RNA	Exon number	Transcript length (nt)	FPKM of D0	FPKM of D30	FPKM of D60	FPKM of D90	FPKM of D120	FPKM of D150	FPKM of D180
lincRNA	2.88 ± 1.22	2504.24 ± 3204.81	0.12 ± 3.83	0.12 ± 3.35	0.13 ± 4.02	0.14 ± 4.38	0.31 ± 3.24	0.33 ± 3.11	0.44 ± 3.44
mRNA	11.69 ± 10.36	2547.96 ± 2170.37	24.75 ± 136.70	25.12 ± 141.67	25.80 ± 150.38	25.20 ± 118.88	24.81 ± 63.63	25.13 ± 70.62	25.58 ± 76.48
