# Supplementary material for: RNA-Seq Implies Divergent Regulation Patterns of LincRNA on Spermatogenesis and Testis Growth in Goats
Source: Animals (Basel). 2021 Feb 26;11(3):625. doi: 10.3390/ani11030625 (PMC7996862; doi:10.3390/ani11030625)
Supplement: Supplementary file 1 [file animals-11-00625-s001.zip › Table S3.xlsx]

## Sheet: Table S3
LincRNA	D0			D30			D60			D90			D120			D150			D180
	T7	T8	T11	T2	T157	T1101	T72	T105	T169	T82	T90	T103	T18	T81	T100	T612	T641	T660	T615	T621	T635
TCONS_00000046	0	0	0	0	0	0	0	0	0	0	0	0	0.0235429	0.161018	0.0729354	0.0473394	0	0	0.0245214	0.146128	0.388651
TCONS_00000058	0	0	0	0	0	0	0	0	0	0	0	0	0	0	4.9331	0	10.8994	0	0	12.6978	0
TCONS_00000188	0	0	0	0	0	0	0	0	0	0	0	0	0	0	0	0	0	0	0	0	0
TCONS_00000189	0	0	0	0	0	0	0	0	0	0	0	0	0	0	0	0	0	0	0	0	0
TCONS_00000190	0	0	0	0	0	0	0	0	0	0	0	0	0	0	0.745083	0.750619	0	0	0.766666	0.562833	0.760473
TCONS_00000222	0.0121032	0.0133319	0.0305107	0.0509804	0.0130212	0.0142661	0.0174781	0.0639545	0.0217858	0.0339297	0	0	0	0	0	0	0	0	0	0	0
TCONS_00000224	0	0.00633157	0	0	0.0225804	0	0	0	0	0.0212227	0	0	0	0	0	0	0	0	0	0	0
TCONS_00000225	0	0	0	0	0	0	0	0	0	0	0	0	0	0	0	0	0	0	0	0	0
TCONS_00000226	0	0	0	0	0	0	0	0	0	0	0	0	0	0	0	0	0	0	0	0	0
TCONS_00000227	0	0	0	0	0.0455915	0	0	0	0	0	0	0	0	0	0	0	0	0	0	0	0
TCONS_00000230	0	0	0	0.0384713	0	0.0170729	0.0183573	0	0.0398521	0	0	0	0.387984	0	0.126765	0	0.13179	0.196352	0.385626	0.619156	0.391172
TCONS_00000231	0.011777	0.050662	0.0565546	0	0.0167867	0	0.0113784	0.0159855	0	0	0.00423473	0.0184304	0.122758	0.31056	0.481406	0.642986	0.0963543	0	0.415847	0	0.0828399
TCONS_00000232	0	0	0	0	0	0.0164583	0	0	0	0	0	0	0	0	0	0	0	0	0	0	0
TCONS_00000241	0	0	0	0	0	0	0	0	0	0	0	0.0209924	0.661264	0.848464	0.6361	0.19127	0.214466	0.230035	0.992702	0	0.935408
TCONS_00000242	0	0	0	0.10639	0	0	0	0	0	0	0	0	1.12915	1.24671	0.400879	0.848978	0.183801	0	0.439469	1.07838	4.62755
TCONS_00000248	0	0	0.00246436	0	0.0157737	0	0	0	0	0	0	0	0	0	0	0	0	0	0	0	0
TCONS_00000273	0.0459181	0.0305474	0.0604817	0.126137	0.0397919	0.021495	0.0477415	0.0597436	0.0190326	0	0.0491961	0.0614425	0.0204883	0.120852	0.0116679	0.167156	0.0179837	0.259728	0	0.11668	0
TCONS_00000278	0	0.0692995	0	0.0177532	0	0.0351901	0.0317226	0	0.0154477	0	0	0	0.26192	0	0.188454	0	0.093841	0.182185	0.250775	0.611929	0.119454
TCONS_00000280	0	0	0	0	0	0	0	0	0	0	0	0	0.172727	0.356237	0	0	0.331211	0.244558	0	0.240766	0.847126
TCONS_00000282	0	0	0	0	0	0	0	0	0	0	0	0	0	0	0	0	0	0	0	0	0
TCONS_00000296	0.29977	0.382408	0.483204	0.633645	0.409059	0.458478	0.234235	1.03023	0.287111	1.57076	0.720285	4.2611	0.818566	1.04416	1.17522	1.70896	0.261241	0.98664	1.00713	0.32184	0.53551
TCONS_00000339	0.138336	0.078058	0.1391	0.12941	0.0698046	0.186633	0.108777	0.149185	0.1379	0.293479	0.269484	1.0027	3.81922	4.27495	3.22005	2.84632	8.68324	4.52155	6.44795	8.91729	9.79651
TCONS_00000348	0.0805826	0	0.181619	0.0482344	0	0.383221	0	0	0.041514	0.103645	0	0.296509	0.384352	0.0866679	0.320466	0.161219	0	0.236802	0.446473	0.116817	0.118684
TCONS_00000429	0.315837	0.0817726	0.286602	0.346901	0.186898	0.0287732	0.0764396	0.027992	0	0.147389	0	0.0565123	0	0	0.0824877	0.0211936	0	0	0.019411	0	0
TCONS_00000528	0	0	0	0	0	0	0	0	0	0	0	0	0	0	0	0	0.109257	0	0	0	0.358934
TCONS_00000529	0	0	0	0	0	0	0	0	0	0	0	0	0.212201	0	0	0.124604	0.300826	0.391477	0.385543	0.782535	0.528004
TCONS_00000533	0	0	0	0	0	0	0	0	0	0	0	0	0.0507208	0.0630035	0	0.0203939	0	0.0205839	0.109751	0	0
TCONS_00000575	0	0	0	0	0	0	0	0	0	0	0	0	0	0	0	0.0577633	0.222815	0	0.140171	0.436906	0.117707
TCONS_00000629	0	0	0.0411525	0	0.0295929	0	0	0	0	0	0	0	0	0	0.0814596	0	0	0.249009	0.172745	0	0.246316
TCONS_00000631	0	0.0682263	0	0.0620981	0.0558513	0	0.0316791	0.0348726	0	0	0	0	0.838088	0	0	0	0.688801	0	0.49988	0	0
TCONS_00000642	0.0844584	0	0	0.00981275	0.00983922	0	0	0	0.0630254	0	0.0746844	0.0149343	0.0419345	0.225034	0.0341412	0.160097	0.0583859	0.153582	0.251225	0.179327	0.397637
TCONS_00000668	0	0	0	0	0	0	0	0	0	0	0	0	0.056375	0.0291404	0.186075	0	0.313583	0	0	0	0.238516
TCONS_00000738	0	0	0	0	0	0	0	0	0	0	0	0	0	0	0	0	0	0	0	0	0.312836
TCONS_00000739	0	0	0	0.0636189	0	0	0	0	0	0	0	0	0	0.196359	0.0595522	0	1.26852	0.176355	1.30049	0	0
TCONS_00000740	0	0	0	0	0	0	0	0	0	0	0	0	0.704764	0	0	0.710447	0	0	0	1.24496	0
TCONS_00000741	0	0	0	0	0	0	0	0	0	0	0	0	0	0	0	0	0.313545	0	0.190483	0	0.499764
TCONS_00000742	0	0	0	0	0	0	0	0	0	0	0	0	0	0.141473	0.295568	0	0.275842	0	0.158801	0	0.284465
TCONS_00000770	0	0	0	0	0	0	0	0	0	0	0	0	0	0	0	0	0.564223	0	0	0	0
TCONS_00000771	0	0	0	0	0	0	0	0	0	0	0	0	0	0	0	0	0	0.206877	0	0	0
TCONS_00000772	0	0	0	0	0.0133835	0.0141778	0.0126811	0	0	0	0	0	0	0	0.383944	0.137344	0.322351	0	0	0	0.592846
TCONS_00000787	0	0	0	0	0	0	0	0	0	0	0	0	0	0	0	0	0	0	0	0	0
TCONS_00000788	0	0	0	0	0	0	0	0	0	0	0	0	0	0	0	0	0	0	0	0	0.821988
TCONS_00000789	0	0	0	0	0	0	0	0	0	0	0	0	0	0	0	0	0.975566	0	0	3.18992	0
TCONS_00000790	0	0	0	0	0	0	0	0	0	0	0	0	0	0	0	0	0	0	0.5898	0	0
TCONS_00000791	0	0	0	0	0	0	0	0	0	0	0	0	0	0	0	0	0	0	0	0	0
TCONS_00000801	0	0	0	0	0	0	0	0	0	0	0	0	0.412406	0	0	0	0	0	0	0	0
TCONS_00000802	0	0	0	0	0	0	0	0	0	0	0	0	0	0	0	0	0	0	0	0	0
TCONS_00000807	0	0	0.00957407	0	0.018182	0	0	0	0.0562512	0	0	0	0.14333	0.109601	0	0	0	0.130976	0	0	0.389151
TCONS_00000840	0	0	0	0	0	0	0	0	0	0	0	0	0	3.32649	0	0	0	0	0	0	0
TCONS_00000872	0	0	0	0	0	0	0.0150113	0	0	0	0	0	0.25313	0.157113	0.0492924	0.251179	0.278129	0	0	0.459205	0.215355
TCONS_00000917	0	0	0	0	0	0	0	0	0	0	0	0	0	0	0	0	0	0	0	0	0
TCONS_00000952	0	0	0.00765626	0	0	0.00263214	0.00539673	0.00248455	0	0	0.00250005	0	0	0	0	0	0	0	0	0	0
TCONS_00000954	0	0	0	0	0	0	0	0	0	0	0	0	0	0	0	0	0	0	0	0	0
TCONS_00000955	0.0235778	0	0	0	0	0	0	0	0	0	0	0	0	0	0	0	0	0	0	0	0
TCONS_00000957	0	0	0	0	0.057551	0	0	0	0	0	0	0	0	0	0	0	0	0	0	0	0
TCONS_00000958	0	0	0	0	0	0	0.0319193	0	0	0	0	0	0	0	0	0	0	0	0	0	0
TCONS_00000959	0	0	0	0	0	0	0	0	0	0	0	0	0	0	0	0	0	0	0	0	0
TCONS_00000968	0	0	0	0	0	0	0	0	0	0	0	0	0	0	0	0	0	0	0	0	0
TCONS_00001073	0	0.05857	0.0674696	0.0164563	0	0	0.0369269	0.0444907	0.0320216	0	0	0.0498634	0.0427692	0	0	0.214987	0	0.122662	0.138224	0.299571	0
TCONS_00001083	0	0	0	0	0	0	0	0	0	0	0	0	0	0.497027	0	0	0.557579	0.316051	0.930994	0	0
TCONS_00001117	0.0101398	0	0.0631885	0.0355657	0	0	0	0	0	0	0	0	0.27353	0.16463	0	0	0.23624	0	0.266501	0.126549	0.243961
TCONS_00001119	0	0	0	0.014342	0	0	0	0	0	0	0	0	0.197123	0	0.376722	0.239322	0	0	0.19339	0	0.403074
TCONS_00001155	0.0180211	0	0	0.0203893	0	0	0	0	0	0	0	0	0.0387232	0.169047	0.10117	0	0	0	0.100457	0.0825331	0.32033
TCONS_00001281	0	0	0	0	0	0	0	0	0	0	0	0	0.0344065	0	0.0732676	0.192758	0.203984	0.232777	0	0.540007	0.459556
TCONS_00001335	0	0	0	0	0	0	0	0	0	0	0	0	0	0.161328	0	1.1229	0.512235	0.408751	0	1.17724	0.4195
TCONS_00001336	0	0	0	0	0	0	0	0	0	0	0	0	0	0	0	0	0	0	0	0	0
TCONS_00001345	0	0.00902381	0	0.00442158	0	0.00298372	0.0106549	0	0	0	0	0	0	0.226132	0	0	0	0	0	0	0
TCONS_00001360	0	0	0	0	0	0	0	0	0	0	0	0	0.332798	0	0.187563	0	0	0.339578	0	0	1.05222
TCONS_00001404	0	0	0	0	0	0	0	0	0	0	0	0	0	0	0.467559	0	0.227777	0.0795442	0.458103	0.838512	0.53097
TCONS_00001425	0	0	0	0	0	0	0	0	0	0	0	0	0	0	0.647787	0.330474	0.265282	0	0	0.21255	1.45927
TCONS_00001426	0	0	0	0	0	0	0	0	0	0	0	0	0	0	0	0	0	0	0	0	0
TCONS_00001441	0	0	0	0.0177034	0	0	0	0	0.0310985	0	0	0	0	0.246013	0.178652	0.160783	0.122563	0.129597	0	0.0773075	0.93851
TCONS_00001495	0	0	0.00421923	0	0.0125434	0	0	0	0	0	0	0	0.139702	0.114289	0.0645792	0	0.178908	0	0	0.15427	0
TCONS_00001523	0	0	0	0	0	0	0	0	0	0	0	0	0.358516	0.647844	2.1308	0	0.121538	0	0.360183	0	0.365549
TCONS_00001802	0	0.0142842	0	0	0	0	0	0.00878229	0	0	0	0	0	0.0046956	0.0683508	0.0738079	0.163914	0.0274176	0	0.189492	0.128462
TCONS_00001804	0	0	0	0	0	0	0	0	0	0	0	0	0.386894	0	0.689394	0	0.569958	0	0.324805	0	0.811849
TCONS_00001819	0	0	0	0	0	0	0	0	0	0	0	0	0	0	0	0	0	0	0	0	0
TCONS_00001820	0	0	0	0	0	0	0	0	0	0	0	0	0	0	0	0	0	0	0	0	0
TCONS_00001821	0	0	0	0	0	0	0	0	0	0	0	0	0	0	0	0	0	0	0	0	0
TCONS_00001823	0	0	0	0	0	0	0	0	0	0	0	0	0	0	0	0	0	0	0	0	0
TCONS_00001824	0	0	0	0	0	0	0	0	0	0	0	0	0	0	0	0	0	0	0	0	0
TCONS_00001861	0	0	0	0	0	0	0	0	0	0	0	0	0	0	0	0	0	0	0	0	0
TCONS_00001862	0	0	0	0	0	0	0	0	0	0	0	0	0	0	0	0	0	0	0	0	0
TCONS_00001864	0	0	0	0	0	0	0	0	0	0	0	0	0	0	0	0	0	0	0	0	0
TCONS_00001937	0.0266611	0.0892354	0	0	0	0	0	0	0	0	0	0	0.0586205	0.086668	0.067925	0.0135265	0.0918085	0.0611363	0.077678	0.0484149	0.051278
TCONS_00001939	0	0	0	0	0	0	0	0	0	0	0	0	0.247781	0	0.468673	0.205351	0	0	0.672114	0.642063	0.832108
TCONS_00001940	0	0	0	0	0	0	0	0	0	0	0	0	0	0	0.088252	0	0	0	0	0.396599	0.158037
TCONS_00001941	0	0	0	0	0	0	0	0	0	0	0	0	0	0	0	0	0.240244	0	0	0.305077	0
TCONS_00001942	0	0	0	0	0	0	0	0	0	0	0	0	0.308811	0.639942	0.233068	0.0611315	0	0	0.550414	0	0
TCONS_00001943	0	0	0	0	0	0	0	0	0	0	0	0	0	0	0.209271	0	0	0	0	0	0
TCONS_00001944	0	0	0	0	0	0	0	0	0	0	0	0	0.473603	0	0	0	0.477114	0	0.410101	0	0.340635
TCONS_00001945	0	0	0	0	0	0	0	0	0	0	0	0	0	0	0	0	0	0.652034	0	1.57925	2.75031
TCONS_00001957	0	0	0	0	0	0	0	0	0	0	0	0	0	0	0	0	0	0	0	0	0
TCONS_00001996	0	0	0	0	0	0	0	0	0	0	0.770887	0	0	0	0	0	0	0	0	0	0
TCONS_00002127	0.0703954	0.13737	0	0	0.210333	0.148156	0	0.207167	0	0.0813984	0.0477221	0	0	0.340431	0.312973	0	0.344908	0.492855	0	0.412208	0.27004
TCONS_00002128	0	0	0.213162	0.251253	0	0	0.0484216	0	0.164924	0	0	0.137335	1.13547	0.81206	1.30985	1.26676	1.36722	1.57936	1.57281	1.66566	1.22298
TCONS_00002129	0	0	0	0	0.312062	0	0.236357	0	0	0	0	0	0.837582	0.615146	0	1.33662	1.25768	1.17256	1.50387	1.41603	0.941854
TCONS_00002132	0	0	0	0	0	0	0	0	0	0	0	0	0	0	0	0	0	0	0	0	0
TCONS_00002139	0	0	0	0	0	0	0	0	0	0	0	0	0	0	0	0	0	0	0	0	0
TCONS_00002141	0	0	0	0	0	0	0	0	0	0	0	0	0	0	0	0	0	0	0	0	0
TCONS_00002142	0	0	0	0	0	0	0	0	0	0	0	0	0	0	0	0	0	0	0	0	0.363628
TCONS_00002143	0	0	0	0	0	0	0	0	0	0.0186988	0	0.076944	0	0	0	0	0.337151	0.027903	0.665236	0	0
TCONS_00002208	0	0	0	0	0	0	0	0	0	0	0	0	0	0	0	0.542274	0	1.88876	0	1.46183	1.2482
TCONS_00002209	0	0	0	0	0	0	0	0	0	0	0	0	0	1.40087	0.89052	1.6597	16.1652	2.61358	7.65545	15.3247	9.88834
TCONS_00002427	0	0	0	0	0	0	0	0	0	0	0	0	0.245437	0.0709828	0	0.234924	0.795668	0	0.541676	0.231906	0.159894
TCONS_00002489	0.168881	0	0	0.114648	0.206352	0.261062	0.164146	0	0.398446	0.0895907	0.0753033	0.0847906	0	0	0	0.0428331	0	0.0212743	0	0	0.154066
TCONS_00002507	0	0	0	0	0	0	0	0	0	0	0	0	0	0	0	0	0	0	0	0	0
TCONS_00002508	0	0.0684038	0	0	0	0	0.0586083	0	0	0	0	0	0	0	0	0	0	0	0.0138047	0	0
TCONS_00002509	0	0	0	0	0	0	0	0	0	0	0	0	0	0	0	0	0	0	0	0	0
TCONS_00002640	0	0	0	0	0	0	0	0	0	0	0	0	0	0	0	0.100501	0	0	0	0.195803	0.314167
TCONS_00002641	0	0	0	0	0	0	0	0	0	0	0	0	0	0	0	0	0	0	0.483822	0.269301	0.0369712
TCONS_00002643	0	0	0	0	0	0	0	0	0	0	0	0	0.867974	0	0.98137	0.817753	1.32678	0.278479	0.727666	0.536155	2.68976
TCONS_00002645	0	0	0	0	0	0	0	0	0	0	0	0	0	0.412877	0	0.103035	0.773329	0	0	1.12681	1.25427
TCONS_00002646	0	0	0	0	0	0	0	0	0	0	0	0	0	0	0	0.0530401	0	0	0	0.222826	0
TCONS_00002647	0	0	0	0	0	0	0	0	0	0	0	0	0	0	0.0191935	0.0161583	0	0	0	0	0
TCONS_00002648	0	0	0	0	0	0	0	0	0	0	0	0	0.100039	0	0	0	0.118747	0	0.761645	0	0
TCONS_00002722	0.271471	0.141073	0.333606	0.118572	0.288597	0.198207	0.129479	0.0624767	0.162312	0	0	0.0244987	0.128647	0	0	0.0259598	0	0.0131885	0	0.0785807	0.0137418
TCONS_00002781	0	0	0.980703	0	0	0	0	0	0	0	0	0	0	0	0	0	0	0	0	0	0
TCONS_00002878	0	0	0	0	0	0	0.0601964	0	0	0	0	0	0	0	0	0	0	0	0	0	0
TCONS_00002892	0	0	0	0	0	0	0	0	0	0	0	0	0	0.0482501	0	0	0.0143187	0	0.114074	0	0.246388
TCONS_00002893	0	0	0	0	0	0	0	0	0	0	0	0	0	0	0.0636288	0	0	0.034909	0	0.63228	0
TCONS_00002943	5.47012	6.01065	4.47379	7.11404	5.01554	6.56839	8.15279	4.8474	3.45983	0	0	0	0	3.27683	0	0	3.45126	0	2.07475	2.09139	3.10071
TCONS_00002950	2.92419	2.62559	2.76903	3.97513	0.614767	2.65756	0.863938	2.63054	0.991507	0.926934	0.288273	1.36236	0.737825	0.680566	0.939129	0.836425	0.388173	0.754063	1.75753	0.862322	1.98462
TCONS_00002961	3.29967	0	3.35387	4.54085	2.41563	3.75917	3.56726	4.17176	0	1.77802	1.30442	1.44892	0.712313	1.037	0.817577	1.22469	0.365037	1.05158	0.847975	0.677675	0.976346
TCONS_00002972	0	0.0760619	0	0	0.0318277	0.0230622	0.107609	0.0311238	0	0	0	0.0314601	0.0923979	0.0207978	0.0664665	0.0489782	0.10689	0.0396365	0.138217	0.0694477	0.0642329
TCONS_00002973	0	0	0	0	0	0	0	0	0	0	0	0	1.68432	0	0	0	0	0	0	0	0
TCONS_00002992	0	0	0	0	0	0	0	0	0	0	0	0	0.600317	0	0	0	0	0	0.505588	1.23038	0
TCONS_00003098	0	1.77195	0	2.61665	2.45089	0	0	2.71098	2.91088	0	0	0	0.51035	0.490701	0.872938	0	0	0	0	0.325657	0.932122
TCONS_00003132	0	0	0	0	0	0	0	0	0	0	0	0	0	0	0	0	0	0	0	0	0
TCONS_00003133	0	0	0	0	0	0	0	0	0	0	0	0	0	0	0	0	0	0	0	0	0
TCONS_00003134	0	0	0	0	0	0	0	0	0	0	0	0	0	0	0.304092	0	0	0	0	0.20061	0
TCONS_00003135	0	0	0	0	0	0	0	0	0	0	0	0	0	0	0	0.31855	0	0	0.167616	0	0
TCONS_00003136	0	0	0	0	0	0	0	0	0	0	0	0	0	0	0	0	0	0	0	0	0
TCONS_00003137	0	0	0	0	0	0	0	0	0	0	0	0	0	0	0	0	0	0	0	0	0
TCONS_00003138	0	0	0	0	0	0	0	0	0	0	0	0	0	0	0	0	0	0	0	0	0
TCONS_00003177	0	0	0.123036	0	0	0	0	0	0	0	0	0.191427	0	0	0	0	0	0.146886	0	0	0.0943824
TCONS_00003178	0.14144	0.135569	0	0	0.0753359	0	0	0	0	0	0	0	0.190097	0.321268	0.19619	0.109315	0.478501	0.316899	0.31752	0.27056	0.251025
TCONS_00003184	0	0	0	0	0	0	0	0	0	0	0	0	0	0	0	0	0	0.102206	0.150452	0.62537	0.0511668
TCONS_00003187	0	0.0497988	0	0.0250035	0.0727685	0	0	0	0	0	0	0	1.26618	0.219112	2.32105	0.439669	3.0509	0.904183	2.76871	4.17593	4.30091
TCONS_00003276	0	0	0	0	0	0	0	0	0	0	0.326788	0	0	0	0.950802	0	0.126539	0	0	0	0
TCONS_00003278	0	0	0	0	0	0	0	0	0	0	0	0	0	0	0	0	0	0	0	0	0.129778
TCONS_00003279	0	0	0	0	0	0	0	0	0.226569	0	0	0	0.450337	0	0.583998	0.246773	0.617878	0	1.08838	0.662349	0.56432
TCONS_00003280	0.340838	0.331358	0.281397	0.610833	0.291749	0.359416	0.314893	0.147407	0.194632	0.491541	0.164346	0.312791	0.342818	0.986551	0	0.731015	0.290468	1.00795	0	0	0
TCONS_00003289	0.0114016	0.0123425	0.0496964	0.103238	0.0602177	0.0131167	0.0113195	0	0	0	0	0	0.0593291	0.047632	0.0626279	0.215373	0.0205774	0.0964043	0	0.122441	0.112631
TCONS_00003303	0	0	0.0783752	0	0	0	0	0	0	0	0	0	0.0747543	0.074696	0.0199587	0.0342341	0.254299	0.187529	0.185469	0.271351	0.230652
TCONS_00003321	0	0	0	0	0	0	0	0	0	0	0	0	0.161996	0.109247	0	0	0.0447226	0.0690425	0.214678	0.441731	0.286907
TCONS_00003323	0	0	0	0	0	0	0	0	0	0	0	0	0	0	0	0	0	0	0	0.461526	0.799175
TCONS_00003326	0	0	0	0	0	0	0	0	0	0	0	0	0.643037	0	0.863136	0	0.835817	0	0.923038	0.682108	0
TCONS_00003327	0	0	0	0	0	0	0	0	0	0	0	0	0	0	0	0	0	0	0	0.365891	0
TCONS_00003328	0	0	0	0	0	0	0	0	0	0	0	0	0	0	0	0	0.623577	0	0.391465	0.404667	0.61328
TCONS_00003331	0	0	0	0	0	0	0	0	0	0	0	0	0.442475	0.400762	1.01114	0	0	0	0	0.642197	0
TCONS_00003332	0	0	0	0	0	0	0	0	0	0	0	0	0	0	0	0	0	0	0	0	0
TCONS_00003342	0	0	0	0	0	0	0	0	0	0	0	0	0	0	0.205724	0.0642985	0.189853	0.435865	0.25811	0.758658	0.515673
TCONS_00003343	0	0	0	0	0	0	0	0	0	0	0	0	0.0472807	0.0963735	0	0.0276366	0	0.0572033	0.0833224	0.247075	0.155993
TCONS_00003455	0	0	0	0	0	0	0	0	0	0	0	0	0.100877	0	0.0748487	0.0955677	0.00880247	0.00859958	0.0863121	0.151774	0.19521
TCONS_00003459	0	0	0	0	0	0	0	0	0	0	0	0	1.41461	1.0245	2.479	1.14199	7.75612	1.74468	3.10937	10.6307	12.6245
TCONS_00003460	0	0	0	0	0.0134851	0	0.0440022	0	0	0	0	0	0.694807	2.14263	0	0.67233	3.93994	1.30894	2.2206	2.84063	0
TCONS_00003461	0	0	0	0	0.0101346	0	0	0	0	0	0	0.114686	3.24569	0	0	0.869974	4.70221	1.0729	6.02825	10.1208	8.08861
TCONS_00003479	0	0	0	0	0	0	0	0	0	0	0	0	0	0	0	0	0	0	0	0	0
TCONS_00003665	0	0.125838	0	0	0	0.128644	0	0.0377991	0.195051	0	0	0.196443	26.3256	28.3051	26.0227	13.1761	70.6141	19.3096	43.1239	42.9676	28.6968
TCONS_00003674	0.269354	0.173321	0.278684	0.349323	0.0935157	0.207546	0.177545	0.215993	0.141906	0.32583	0.120766	0.136265	0.240381	0.210357	0	0.182868	0.0836113	0.160348	0.0951589	0	0.187218
TCONS_00003747	0.0412215	0	0.0917111	0	0	0	0	0.0452997	0	0	0	0	0.136294	0.781253	0.280776	0.215569	0.16048	0.258663	0.877233	0.377376	0.0757249
TCONS_00003750	0	0	0	0	0	0	0	0	0	0	0	0	0	0	0	0	0	0	0	0	0
TCONS_00003755	0	0	0	0	0	0	0	0	0	0	0	0	0	0	0	0	0	0	0	0	0
TCONS_00003756	0	0	0	0	0	0	0	0	0	0	0	0	0	0	0	0	0	0	0	0	0
TCONS_00003765	0	0	0	0	0	0	0	0	0	0	0	0	0	0	0	0	0	0	0	0	0
TCONS_00003766	0	0	0	0	0	0	0	0	0	0	0	0	0	0	0	0	0	0	0	0	0
TCONS_00003773	0	0	0	0	0	0	0	0	0	0	0	0	0	0	0	0	0	0	0	0	0
TCONS_00003774	0	0	0	0	0	0	0	0	0	0	0	0	0	0	0	0	0	0	0	0	0
TCONS_00003907	0	0	0	0	0	0	0	0	0	0	0	0	0	0.650054	0.708689	0	1.46924	0.691699	0.974849	1.53275	2.28629
TCONS_00003909	0	0	0	0	0	0	0	0	0	0	0	0	0	0.345123	0	0.359168	0	0	0	0	0.660339
TCONS_00003910	0	0	0	0	0	0	0	0	0	0	0	0	1.11855	0	0	0	0	0.330674	0.722312	0	0
TCONS_00003912	0	0	0	0	0	0	0	0	0	0	0	0	0.487016	0	0.592479	0.266522	0.425562	0	0	0.612123	0
TCONS_00003914	0	0	0	0	0	0	0	0	0	0	0	0	0	0.252093	0	0.209051	0	0.230927	0	0	0
TCONS_00003948	0.0725052	0.0484779	0.121891	0.130497	0.100736	0	0.1225	0.171092	0.141131	0	0.0402056	0.0270349	0	0	0	0.00640749	0	0.00649527	0	0	0.00661205
TCONS_00003955	0	0	0	0	0	0	0	0	0	0	0.0433543	0	0	0	0	0	0	0	0	0.781241	0
TCONS_00003956	0.0237817	0	0	0.000998856	0	0	0	0	0	0	0	0	0.339533	0	0.24814	0	0.418358	0.420206	0.596968	0	0.88274
TCONS_00003957	0	0	0	0.00787671	0	0	0.0348045	0	0	0	0	0	0	0.308942	0	0	0	0	0.809535	0.567812	0.511479
TCONS_00003959	0	0	0	0	0	0	0	0	0	0	0	0	0	0	0.116671	0	0	0.0328125	0.282904	0	0
TCONS_00003967	0	0	0	0	0	0	0	0	0	0	0	0	0	0.449193	0	0	0	0.160727	0	0	0
TCONS_00003969	0	0	0	0	0	0	0	0	0	0	0	0	0	0	0	0.542737	0	0	0	1.64984	0
TCONS_00003970	0	0	0	0	0	0	0	0	0	0	0	0	0	0	0	0.293552	0	0.195426	0	0	0
TCONS_00004068	0	0	0	0	0	0	0	0	0	0	0	0	0	0	0	0	0	0	0	0	0
TCONS_00004087	0	0	0	0	0	0	0	0	0	0	0	0	0	0	0	0.415078	0	0	0	0	0
TCONS_00004088	0	0	0	0	0.0113134	0	0	0	0	0	0	0	0	0	0	0.21531	0.262228	0.190932	0	0	0.394835
TCONS_00004089	0	0	0	0	0	0	0	0	0	0	0	0	0	0	0	0.123965	0	0	0.263484	0	0
TCONS_00004090	0.0328822	0	0	0	0.0428207	0.0279327	0.0276442	0	0.0163499	0	0	0.0184269	0.934166	1.06998	1.0028	0.833176	0.746344	0.918461	1.50194	1.34665	2.20597
TCONS_00004091	0.0305972	0	0	0	0	0	0	0	0.0799198	0	0.0141852	0	0	0.592007	0.554418	0	0.756573	0	0	1.17785	1.18234
TCONS_00004092	0	0	0	0	0	0	0	0	0	0	0	0.0134852	0	0	0	0	0	0	0	0	0
TCONS_00004100	0	0	0	0.0555891	0	0	0	0	0	0	0	0	0	0	0	0	0	0	0	0	0
TCONS_00004194	0	0	0	0	0	0	0	0	0.240269	0	0	0	0	0.246527	1.14465	0.739031	1.0686	0.116001	1.30519	0.567518	1.19676
TCONS_00004208	0	0	0	0	0	0	0	0	0	0	0	0	3.28653	0	3.30219	3.0583	1.96571	7.90605	3.60501	3.56713	6.14138
TCONS_00004210	0	0	0	0	0	0	0	0	0	0	0	0	0.942373	0.612778	1.1654	1.09471	0.484984	0.87611	0.813718	0	0.616472
TCONS_00004211	0	0	0	0	0	0	0	0	0	0	0	0	0	0	1.19365	0.804992	0.839393	1.57885	0	1.13174	0.875352
TCONS_00004212	0	0	0	0	0	0	0	0	0	0	0	0	0.218844	0.156537	0.143915	0.132317	0.141965	0.0982218	0.164867	0.128815	0.408834
TCONS_00004213	0	0	0	0	0	0	0	0	0	0	0	0	0	0	0	0	0	0	0	0	0
TCONS_00004214	0	0.000533173	0	0.00216214	0	0	0	0	0.00148716	0	0	0	0.42779	0.504082	0.261092	0.34747	0.144104	0.275011	0.520035	0.500446	0.90584
TCONS_00004215	0.000504072	0	0.000949831	0	0	0.00396251	0.000465543	0.00185153	0	0	0	0.000497361	0	0	0	0	0	0	0	0	0
TCONS_00004216	0	0	0	0	0	0	0	0	0	0	0	0	0	0	0	0	0	0	0	0	0
TCONS_00004217	7.42e-05	0	0.000320031	0	0	0	0.000129951	0	0	0	0	0.000129188	0	0	0	0	0	0	0	0	0
TCONS_00004280	0	0	0	0	0.251385	0.0872602	0.168319	0	0	0.216478	0	0.245588	0	0	0	0	0	0	0	0	0
TCONS_00004281	0	0	0	0	0	0	0	0	0	0	0	0	0	0	0	0	0	0	0	0	0
TCONS_00004330	0	0	0.201011	0	0	0	0	0	0	0	0	0	0	0	0	0.194552	0.163652	0.430518	0.356445	0.427882	0.248996
TCONS_00004463	0	0	0.0178165	0	0	0	0	0	0	0	0	0	0.0439	0.207394	0	0	0	0	0	0.114467	0.158927
TCONS_00004464	0	0	0	0.0385922	0.0220006	0	0	0.0855843	0.0549801	0.0504378	0	0.0755492	0.034401	0.11082	0	0	0.179647	0	0	0	0.220283
TCONS_00004465	0	0	0	0	0	0	0.0258675	0	0	0	0	0	0	0	0.0840717	0.0399764	0	0.0378561	0	0	0.104677
TCONS_00004466	0	0	0	0	0	0	0	0	0	0	0	0	0.114144	0	0	0	0	0	0	0	0
TCONS_00004469	0	0	0	0	0	0	0	0	0	0	0	0	0	0	0.236188	0	0.0433714	0.0926964	0	0.0693581	0.184353
TCONS_00004482	0.0721622	0.194196	0.110932	0.211529	0.130622	0	0.0153754	0.252435	0.149637	0	0.0467118	0.0634674	0	0	0	0	0.0156842	0.0795948	0	0	0.0656574
TCONS_00004483	0	0	0	0	0.54399	0	0	0	0	0	0.134722	0	0	0	0	0	0	0	0	0	0
TCONS_00004486	0	0	0	0	0	0	0	0	0	0	0	0	0	0	0	0.212784	0.177282	0	0	0.438706	0
TCONS_00004487	0	0	0	0	0	0	0	0	0	0	0	0	0.284845	0.148258	0.386684	0.293171	0.233951	0	0.482707	0	0.4936
TCONS_00004488	0.0136172	0.0702881	0.00745981	0.0304585	0.07634	0.0864144	0	0	0.0498054	0	0	0	0.0920518	0	0	0	0	0	0.115115	0	0
TCONS_00004489	0	0	0	0	0	0	0	0	0	0	0	0	0	0	0	0	0	0	0.203352	0	0
TCONS_00004505	0	0	0	0	0	0	0	0	0	0	0	0	0.785628	0	0	0	0.798116	0.501062	0.417577	0	0.48116
TCONS_00004523	0	0	0	0	0	0	0	0	0	0	0	0	0	0	0	0	0	0	0	0	0
TCONS_00004524	0	0	0	0	0	0	0	0	0	0	0	0	0	0	0	0	0	0	0	0	0
TCONS_00004588	0	0	0	0	0	0	0	0	0	0	0	0	0	0	0.534506	0	0.279265	0	0	0	0
TCONS_00004589	0.0310116	0.0665874	0.080457	0.0346188	0.0130562	0.0211704	0	0.0199361	0	0	0.0128647	0.185073	0.170809	0.335639	0	0.495386	0.317859	0.742049	0.486901	0.355441	0.421846
TCONS_00004650	0	0	0	0	0	0	0	0	0	0	0.0716546	0	0.821556	0.832036	0.951604	0	0.312113	0.182508	0.14082	0.234491	0
TCONS_00004651	0	0	0.062082	0	0	0	0	0	0	0	0	0	0	0.0615763	0	0	0.0880438	0	0.0242529	0.172205	0
TCONS_00004664	0	0	0	0	0	0	0	0	0	0	0	0	0	0	0	0	0.50039	0	0.0840161	0.0405761	0.0852351
TCONS_00004725	0	0.294923	0	0	0	0	0	0	0	0	0	0	0.420721	0	0.441434	0	0	0	0	0	0
TCONS_00004726	0	0.361315	0.324804	0	0.383297	0	0.267748	0.532249	0	0	0	0.34052	0.331421	0.561663	0	0	0	0.654826	0	0	0
TCONS_00004729	0	0	0	0	0	0	0	0	0	0	0	0	0	0	0	0	0	0	0	0	0
TCONS_00004738	0	0	0	0	0	0	0	0	0	0	0	0	0	0	0	0	0	0	0	0	0
TCONS_00004739	0	0	0	0	0	0	0	0	0	0	0	0	0	0.404495	0.378111	0.065653	0.999058	0.174733	0.4504	1.34714	1.42413
TCONS_00004740	0	0	0	0	0	0	0	0	0	0	0	0.0326346	0.161929	0	0.111291	0	0.73036	0.0500491	0	0.271574	0.275281
TCONS_00004772	0.0280736	0	0	0.0576081	0.0612549	0	0.0587371	0	0	0	0	0	0	0	0	0	0	0	0	0	0
TCONS_00004888	0.00736433	0	0.00772182	0	0	0	0	0	0	0	0.0129771	0	0	0	0.226344	0.218781	0.109168	0.249131	0.230413	0.121318	0.306597
TCONS_00004889	0.00185021	0	0	0.00758744	0.0166392	0	0.00230208	0.00475083	0	0	0	0	0	0	0	0	0	0	0	0	0
TCONS_00004910	0	0.0161373	0	0	0	0	0	0	0	0	0.0160007	0.086732	0	0	0	0	0	0	0	0	0
TCONS_00004953	0	0	0	0	0	0	0	0	0	0	0	0	0.0326274	0.035481	0.0737161	0	0.120994	0	0.0855427	0.525091	0.0853675
TCONS_00005026	0.192357	0	0	0	0	0	0	0	0	0	0	0	0.0830822	0.559389	0.170459	0.305323	0.148503	0.155896	0	0.0381676	0.320037
TCONS_00005033	0	0	0	0	0	0	0	0	0	0	0	0	0	0	0.0192946	0	0.0777103	0	0	0	0
TCONS_00005035	0	0	0	0	0	0	0	0	0	0	0	0	0	2.91786	0	0	0	0	0.230948	0	0
TCONS_00005036	0	0	0	0	0	0.734442	0	0	0	0	0	0	0	0	0	0	4.46421	0	0	0	0
TCONS_00005118	0	0	0	0	0	0	0	0	0	0	0	0	0	0	0	0	0.38217	0	0	0.468433	1.48188
TCONS_00005299	0	0	0	0	0	0	0	0	0	0	0	0	0	0	0	0	0	0	0	2.27744	0
TCONS_00005354	0.135993	0.129248	0.338025	0.0886662	0.21115	0.111446	0.0582374	0.224042	0.118385	0	0.102956	0.121797	0.0206992	0	0.02214	0	0.0932966	0.0377314	0.0948349	0.0187548	0.0191193
TCONS_00005511	0.133589	0.147615	0.403808	0.163819	0.0159969	0.117028	0.0449331	0.0517937	0.122318	0	0.063876	0.015804	0.0927291	0.153299	0.117525	0.0428069	0.0573538	0.100714	0	0	0.173802
TCONS_00005535	0.065697	0	0.0244597	0.0968414	0	0.073959	0.113046	0.0895427	0	0	0	0	0.340302	0.142283	0.0250112	0.0609136	0.0648342	0.0814657	0.430081	0.205122	0.222811
TCONS_00005597	0	0	0	0	0	0	0	0	0	0	0	0	0	0	0	0	0	0	0	6.4398	0
TCONS_00005598	0	0	0	0	0	0	0	0	0	0	0	0	3.12906	3.21687	3.8356	1.2189	0	0	0	0	0
TCONS_00005599	0	0	0	0	0	0	0	0	0	0	0	0	3.32759	3.17281	3.36237	1.35986	12.6352	6.91991	12.017	12.1062	8.55961
TCONS_00005600	0	0	0	0	0	0	0	0	0	0	0	0	0	0	0	0	0	4.76278	0	0	0
TCONS_00005601	0	0	0	0	0	0	0	0	0	0	0	0	0	3.90519	0	0	0	0	0	0	0
TCONS_00005603	0	0	0	0	0	0	0	0	0	0	0	0	4.79963	4.91244	5.35468	5.62434	19.4406	8.51745	13.4792	0	16.0487
TCONS_00005604	0	0	0	0	0	0	0	0	0	0	0	0	0	0	0	0	0	0	0	0	7.32385
TCONS_00005605	0	0	0	0	0	0	0	0	0	0	0	0	0.702363	0.500385	0.873902	0.261557	1.76464	1.38925	1.09891	2.1638	2.66068
TCONS_00005606	0	0	0	0	0	0	0	0	0	0	0	0	0.168815	0	0	0	0	0	0.167823	0.359125	0
TCONS_00005616	0	0.101464	0	0.0702037	0	0	0	0	0	0	0	0	0	0.401431	0	0.191783	0.438782	0.0644623	0.0653146	0.0642782	0.531995
TCONS_00005619	0	0	0	0	0	0	0	0	0	0	0	0	0	0	0	0.101693	0.127073	0.0946465	0.155791	0.169652	0.193965
TCONS_00005620	0	0	0	0	0	0	0	0	0	0	0	0	0	0.327438	0	0	0.654708	0.436916	0.0398906	0.29462	0.648507
TCONS_00005625	0	0	0.0302655	0	0	0.0798475	0	0	0	0	0	0	5.65861	4.0961	0.200948	0	0.815516	0.263352	0.754488	0.827437	1.73911
TCONS_00005747	0	0	0	0	0	0	0	0	0	0	0	0.0480021	1.07123	0.64041	0.352621	0.385732	1.39558	0.165863	1.80703	1.24015	1.66181
TCONS_00005748	0	0	0	0	0	0	0	0	0	0	0	0	0.774009	1.05156	1.10387	0.388489	1.04457	0.311271	0.881302	1.89933	2.38816
TCONS_00005751	0	0	0	0	0	0	0	0	0	0	0	0	0.0940284	0	0.391375	0	0.041633	0.259002	0	0.549427	0
TCONS_00005762	0	0	0	0	0	0	0	0	0	0	0	0	0.0423976	0	0	0.0611682	0	0.200381	0.0178581	0.0660592	0
TCONS_00005797	0	0	0	0	0	0	0	0	0	0	0	0	0	0.298329	0	0	0	0	0	0	0
TCONS_00005798	0	0	0	0	0	0	0	0	0	0	0	0	0	0	0	0.105427	0.582971	0	0	0.202842	0
TCONS_00005799	0	0	0	0	0	0	0	0	0	0	0	0.0203116	0	0	0.308691	0	0	0.156669	0.306741	0.786873	0.522262
TCONS_00005800	0	0	0	0	0	0	0	0	0	0	0	0	0	0.530555	0	0.257208	0.63022	0	0	0.582102	0
TCONS_00005801	0	0	0	0	0	0	0	0	0	0	0	0	0.45147	0	0	0	0.186405	0	0	0	0
TCONS_00005802	0	0	0	0	0	0	0	0	0	0	0	0	0	0	0	0	1.47798	1.1962	0	0	0
TCONS_00005915	0.14645	0.130311	0.0535161	0.140373	0	0.0275802	0.263387	0	0.167554	0.0656665	0	0	0.0497578	0.0764934	0.369084	0.0683538	0.377521	0.111245	0.0214937	0.0212547	0.0238014
TCONS_00005937	0	0	0	0	0	0	0	0	0	0	0	0	0	0.0432016	0	0	0	0	0	0	0
TCONS_00005938	0	0	0	0	0	0	0	0	0	0	0	0	0	0	0	0	0	0	0	0	0.242991
TCONS_00005939	0	0	0	0	0	0	0	0	0	0	0	0	0	0.22791	0	0	0.0444321	0	0.0408284	0.217361	0
TCONS_00005950	0	0	0	0	0	0	0	0	0	0	0	0	0	0	0	0	0	0	0	0	0
TCONS_00005955	0	0	0	0	0	0	0	0	0	0	0	0	0	0	0	0	0	0	0	0	0
TCONS_00005981	0	0	0	0	0	0	0	0	0	0	0	0	0	1.56342	0	0	0	0	0	0	0
TCONS_00006009	0	0	0	0	0	0	0	0	0	0	0	0	0.249683	0.0691108	0	0	0	0.103169	0.0429247	0.126724	0
TCONS_00006106	0	0	0	0	0	0	0	0	0	0	0	0	0	0	0	0	0	0	0	0	0
TCONS_00006161	0	0	0	0	0	0	0	0	0	0	0	0	0.153217	0	0	0	1.91211	0.460294	0	0	0.157792
TCONS_00006183	0	0	0	0	0	0	0	0	0	0	0.0374679	0	0	0	0	0	0	0	0	0	0
TCONS_00006184	0	0	0	0	0	0	0	0	0	0	0	0	0	0	0	0	0	0	0	0	0
TCONS_00006204	0	0	0	0	0	0	0	0	0	0	0	0	1.03764	0.322759	0	0	3.03741	0	0	0	0
TCONS_00006206	0	0	0	0	0	0	0	0	0	0	0	0	4.48163	5.3269	4.84838	1.34404	9.38628	3.5867	6.20992	7.24704	10.1944
TCONS_00006208	0	0	0	0	0	0	0	0	0	0	0	0	0	0	0	0	0	0	0	0	0
TCONS_00006467	0	0	0	0	0	0	0	0	0	0	0	0	0	0	0	0	0	0	0	0	0
TCONS_00006468	0	0	0	0	0	0	0	0	0	0	0	0	0	0	0	0	0	0	0	0	0
TCONS_00006492	0	0	0.0423209	0	0	0	0	0	0	0	0	0	0	0	0	0	0.518945	0	0.565217	0.458083	0
TCONS_00006493	0	0.0418356	0	0	0	0	0	0	0	0	0	0	0.327567	0	0	0	0.515026	0.18512	0.488371	0.357652	0
TCONS_00006503	0.0742932	0.0305993	0.0861852	0.152945	0.0573384	0.0313419	0	0	0	0	0	0.382396	0	0.0298942	0	0	0	0	0.0363309	0.0349236	0
TCONS_00006613	0	0	0	0	0	0	0	0	0	0	0	0	0	0	1.90321	0.233908	0	0.537408	0.437237	0	0
TCONS_00006615	0	0	0	0	0	0	0	0	0	0	0	0	0.91459	0.708163	0.103487	0.086641	1.86115	0.407539	0.164843	0.234471	0.405022
TCONS_00006625	0.219684	0	0	0	0.123477	0	0	0	0.114445	0	0	0	0.338846	1.38684	1.15192	0.571467	1.60162	1.28368	0.438816	2.59457	1.80074
TCONS_00006754	0	0	0	0.0112221	0	0	0.00996414	0	0	0	0	0	0	0.121987	0	0	0	0	0	0	0
TCONS_00006806	0	0	0	0	0	0	0	0	0	0	0	0	0	0	0	0	0	0	0	0	0
TCONS_00006913	0	0.175376	0.152782	0.0653503	0	0	0	0	0	0	0.157946	0	0	0	0	0	0	0	0	0	0.236243
TCONS_00006927	0	0	0	0	0	0	0	0	0	0	0	0	0	0	0.478538	0	0.420376	0.21726	0	0.26882	0.415428
TCONS_00006929	0	0	0	0.0237485	0	0	0	0	0	0	0	0	0	0	0	0	0	0	0	0.199505	0.246466
TCONS_00006930	0	0	0	0	0	0	0	0	0	0	0	0.0162256	0	0	0	0	0	0	0	0	0
TCONS_00006932	0	0	0	0	0	0	0	0	0	0	0	0	0	0	0	0	0	0	0	0	0
TCONS_00006938	0	0	0	0	0	0	0	0	0	0	0	0	0	0	0	0	0	0	0	0.153711	0
TCONS_00006959	0	0	0	0	0	0	0	0	0	0	0	0	0	0	0	0	0.254895	0.18392	0.0479153	0.04474	0.527094
TCONS_00006979	0	0.106984	0	0	0	0	0.160166	0	0.0928064	0.186353	0.229916	0	0.183364	0	0.131333	0.205777	0	0.235474	0.161126	0.117906	0
TCONS_00006992	0.197202	0.185745	0.203355	0	0.240839	0.179363	0.233054	0.366765	0.195887	0.288055	0.198956	0.33155	0.441218	0.440203	0.354574	0.323026	0.219444	0.56635	0.374072	0.0373308	0.641064
TCONS_00007034	0	0	0	0	0	0	0	0	0	0	0	0	0	0	0	0	0	0	0	0	0
TCONS_00007035	0	0	0	0	0	0	0	0	0	0	0	0	0	0	0	0	0	0	0	0	0
TCONS_00007037	0	0	0	0	0	0	0	0	0	0	0	0	0	0	0	0	0	0	0	0	0
TCONS_00007123	0	0	0	0	0	0	0	0	0.0309457	0	0.0321304	0	0.0976046	0	0	0	0.111212	0	0.174235	0	0
TCONS_00007207	0	0	0	0	0	0	0	0	0	0	0	0	0	0	0	0	0	0	0.266579	0	0
TCONS_00007208	0	0	0	0	0	0	0	0	0	0	0	0	0	0.081597	0.388408	0.120827	0.191285	0	0	0	0
TCONS_00007215	0	0	0	0	0	0	0	0	0	0	0	0	0.701433	0.729044	0	0	0	1.18084	0	1.35296	0
TCONS_00007321	0	0	0	0	0	0	0	0	0	0	0	0	0	0	0	0	0	0	0	0	0
TCONS_00007322	0	0	0	0	0	0	0	0	0	0	0	0	0	0	0	0	0	0	0	0	0
TCONS_00007325	0	0	0	0	0	0	0	0	0	0	0	0	0	0	0	0	0	0	0	0	0
TCONS_00007334	0	0	0	0	0	0	0	0	0	0	0	0	0	0	0	0	0	0	0	0	0
TCONS_00007346	0	0	0	0	0	0	0	0	0	0	0	0	0.103185	0.136603	0	0.0469549	0.269612	0.213174	0.190052	0.0635262	0
TCONS_00007347	0	0	0	0	0	0	0	0	0	0	0	0	0	0	0	0.0679376	0	0	0	0	0.293269
TCONS_00007348	0	0	0	0	0	0	0	0	0	0	0	0	0	0.192416	0	0.178075	0.282275	0	0	0	0.739715
TCONS_00007350	0	0	0	0	0	0	0	0	0	0	0	0	0.0558235	0	0	0.0337815	0	0	0	0.0495586	0.110322
TCONS_00007405	0	0	0	0.408006	0.0317252	0.0679354	0.205378	0	0	0.163717	0	0	0.690332	0.787856	0.589712	0.56877	0.798724	0.94766	0.44314	1.62832	1.34642
TCONS_00007437	0.00860573	0	0.00947542	0.0047696	0.0522193	0.0148965	0.00917543	0.0233563	0.0540356	0.0228468	0.0869515	0.0863318	0.0890904	0.083282	0.0624263	0	0	0.0439423	0.168934	0.133771	0.163613
TCONS_00007454	0.296819	0.104655	0.0571343	0.150457	0.169062	0.255032	0	0.262529	0.279917	0.258762	0.137767	0.146347	0	0.115209	0	0	0	0.0780596	0	0	0
TCONS_00007487	0	0	0	0	0	0	0	0.13331	0	0.277859	0	0	0	0	0	0	0	0	0	0	0
TCONS_00007510	0	0	0	0.211133	0	0.222618	0	0	0.0469808	0	0	0	0	0	0	0	0	0	0.897617	1.26148	1.29116
TCONS_00007519	0	0	0	0	0	0	0	0	0	0	0	0	0.522292	0	0	0	0	0.514108	0.26067	2.67941	0
TCONS_00007527	0	0	0	0	0	0	0	0	0	0	0	0	0	0	0.454122	0.0439211	0.822554	0	0	0.539346	0.217964
TCONS_00007587	0.369633	1.12605	0.514492	0.436189	0	0.540634	0	0.100769	0.18885	0	0.601539	0	0	0	0.102408	0	0.190634	0	0.0957037	0	0
TCONS_00007595	0	0	0	0	0	0	0	0	0	0	0	0	0.0262331	0.062999	0	0.209992	0	0.11691	0.177335	0	0.127769
TCONS_00007600	0	0	0	0	0	0	0	0	0	0	0	0	0.135814	0.169781	0.0659599	0.126724	0	0.352884	0.171133	0.151923	0
TCONS_00007602	0	0	0	0	0	0	0	0	0	0	0	0	0.0635687	0	0	0	0.181072	0	0	0	0
TCONS_00007603	0	0	0	0	0	0	0	0	0	0	0	0	0	0	0	0	0	0	0.103944	0	0
TCONS_00007606	0	0	0	0	0	0	0	0	0	0	0	0	0	0	0	0	0	0	0	0	0
TCONS_00007607	0	0	0	0	0	0	0	0	0	0	0	0.0281252	0	0.268263	0.040376	0	0	0	0	0	0
TCONS_00007612	0	0	0	0	0	0	0	0	0	0	0	0.109245	0	0	0.0623594	0.0388043	0	0	0.0478259	0	0
TCONS_00007655	0	0	0	0	0	0	0	0	0	0	0	0	0.21107	0.301621	0	0	0.331496	0	0	0	0
TCONS_00007656	0	0	0	0	0	0	0	0	0	0	0	0	0	0	0.364838	0	0	0	0	0	0
TCONS_00007657	0	0	0	0	0	0	0	0	0	0	0	0	0.0885227	0	0	0	0	0	0	0	0.279051
TCONS_00007658	0	0	0	0	0	0	0	0	0	0	0	0	0.0968172	0	0	0	0	0	0.140484	0	0
TCONS_00007659	0	0	0	0	0	0	0.0158791	0	0	0	0	0	0	0	0	0	0	0	0	0	0
TCONS_00007660	0	0	0	0.0075279	0	0	0	0	0	0	0	0.0504503	0	0	0.491436	0.0998529	0.464144	0.141332	0.366996	0.380698	0.451449
TCONS_00007663	0	0	0	0	0	0	0	0	0	0	0	0	1.02138	0.795129	0	0	0	0	0	0	0
TCONS_00007700	0	0	0	0.021549	0	0	0	0	0	0	0	0	0.468919	0	0	0	0.557599	0.268912	0.406386	0.327818	0.170245
TCONS_00007702	0	0.0187729	0	0	0	0	0	0	0	0	0	0	0	0.475124	0	0	0	0	0.245909	0	0
TCONS_00007704	0	0	0	0	0	0	0	0	0	0	0.0237051	0.0241078	0	0.290765	0	0	0	0	0	0	0
TCONS_00007709	0	0	0	0	0	0	0	0	0	0.0612155	0.06093	0	0	0	0	0	0	0	0	0	0
TCONS_00007725	0	0.00295779	0.0105323	0	0	0	0	0	0	0	0.0215712	0.0213837	0.0623856	0	0	0	0	0.0547207	0.154415	0	0
TCONS_00007726	0	0.00933879	0	0	0	0	0	0	0	0	0	0	0.0431696	0.144858	0.0461751	0.121931	0.116996	0.0692121	0.043326	0.0717755	0
TCONS_00007766	0	0	0	0	0	0	0	0	0	0	0	0	0.0590645	0	0	0	0	0	0	0.582959	0
TCONS_00007791	0	0	0	0	0	0	0	0	0	0	0	0	0	0	0	0	0	0	0	0	0
TCONS_00007821	0	0	0	0.577463	0.835397	0	0.787602	0	0.795611	0	0	0	0	0	0	0	0	0.193049	0	0	0
TCONS_00007824	0.00706526	0.00392707	0.0264397	0	0	0	0.114207	0	0	0	0	0.00385965	0.0685797	0.184755	0.254147	0.0811224	0.194546	0.317345	0.433506	0.181118	0.103735
TCONS_00007825	0	0	0	0	0	0	0	0	0	0	0	0	0	0	0	0	0	0	0	0	0
TCONS_00007826	0	0	0	0	0.0707076	0	0.102086	0	0	0	0	0	0.109338	0	0	0	0	0	0	0	0
TCONS_00007827	0	0	0	0	0	0	0	0	0	0	0	0	0	0	0	0	0	0	0	0	0
TCONS_00007830	0	0	0	0	0	0	0	0	0	6.61179	0	0	0	0	0	0	0	0	0	0	0
TCONS_00007839	0	0	0	0	0	0	0	0	0	0	0	0	0	0	0	0	0	0	0	0	0
TCONS_00007848	0	0	0	0	0	0	0	0	0	0	0	0	2.08701	2.24784	2.43575	1.21188	0	0	1.43955	0.806394	0.747632
TCONS_00007850	0	0	0	0	0	0	0	0	0	0	0	0	0	0	0	0	0	0	0	0	0
TCONS_00007851	0	0	0	0	0	0	0	0	0	0	0	0	0	0	2.85192	0	0	0	0	0	0
TCONS_00007919	0	0	0	0	0	0	0	0	0	0	0	0.053324	2.20054	4.29457	3.8485	3.03518	2.82382	2.81761	5.27415	5.69321	3.59276
TCONS_00007920	0	0	0	0	0	0	0	0	0	0	0	0	2.90597	1.68936	1.55751	0	1.86737	2.72379	1.75645	1.39294	4.15315
TCONS_00007925	0	0	0	0	0.022393	0	0.0107501	0	0	0	0	0	0.116124	0	0	0	0	0	0	0	0
TCONS_00007926	0	0	0.0128761	0	0	0.0140814	0	0	0	0	0	0	0.111434	0.225672	0.171388	0	0.185416	0	0.21307	0.156909	0
TCONS_00008054	0	0	0	0	0	0	0	0	0	0	0	0	0	2.06439	0	0	0	0.681854	0	1.32326	0
TCONS_00008065	0	0	0	0	0	0	0	0	0	0	0	0	0	0	0	0	0	0	0	0	0
TCONS_00008067	0	0	0	0	0	0	0	0	0	0	0	0	0	0	4.05299	0	0	0	0	0	0
TCONS_00008068	0	0	0	0	0	0	0	0	0	0	0	0	0	0	0	0	0	0	0	0	0
TCONS_00008069	0	0	0	0	0	0	0	0	0	0	0	0	0	0	0	0	0	0	0	0	0
TCONS_00008070	0	0	0	0	0	0	0	0	0	0	0	0	0	0	0	0	0	0	0	0	0
TCONS_00008204	0	0	0	0	0	0	0	0	0	0	0	0	0.0897663	0	0.0606072	0	0	0	0	0	0.60312
TCONS_00008205	0	0.00899548	0	0	0	0	0	0	0	0	0	0	0	0	0	0.0603009	0	0.0873786	0.321216	0	0
TCONS_00008214	0	0	0	0	0.0265477	0	0	0	0	0	0	0	0	0	0	0	0.129318	0	0	0	0
TCONS_00008215	0	0	0	0	0	0	0	0	0	0	0	0	0	0	0	0.199827	0	0	0	0	0
TCONS_00008230	0	0	0	0	0	0	0	0	0	0	0	0	0	0	0	0	0	1.05408	0	0	0
TCONS_00008242	0	0	0	0	0	0	0	0	0	0	0	0	0	0	0.137003	0	1.03257	0.182284	0.0613733	0.0595217	0.42832
TCONS_00008243	0	0	0	0	0	0	0	0	0	0	0	0	0	0	0	0	0	0	0	0	0
TCONS_00008317	0	0	0	0	0	0.0619683	0.0865468	0	0	0	0	0	0.0984806	0	0	0	0	0	0	0.0693817	0
TCONS_00008320	0.0795468	0.174134	0.289005	0	0.133279	0.165651	0.172842	0.187505	0.114932	0.526747	0.110176	0.230031	4.61125	7.97005	4.79589	10.4911	11.6287	7.72026	13.918	10.6209	4.97487
TCONS_00008323	0.0467484	0	0.035584	0.056663	0.0445015	0.0387433	0.0160138	0	0	0.0586571	0	0	0.253851	0.296427	0	0.0748073	0	0.0679917	0.0263303	0	0.09909
TCONS_00008332	0.171964	0	0	0.108813	0	0.341814	0.101129	0.0769501	0.145835	0.174434	0	0	0.05381	0	0	0	0.229526	0.080476	0.245507	0	0
TCONS_00008379	0	0	0	0	0	0	0	0	0	0	0	0	0	0	0	0	0	0	0	0	0
TCONS_00008406	0	0	0	0	0	0	0	0	0	0	0	0	0	0	0	0	0	0	0	0	0
TCONS_00008407	0	0	0	0	0	0	0	0	0	0	0	0	0	0	0	0	0	0	0	0	0
TCONS_00008408	0	0	0	0	0	0	0	0	0	0	0	0	0	0	0	0	0	0	0	0	0
TCONS_00008409	0	0	0	0	0	0	0	0	0	0	0	0	0	0	0	0	0	0	0	0	0
TCONS_00008411	0	0	0	0	0	0	0	0	0	0	0	0	0	0	0	0	0	0	0	0	0
TCONS_00008413	0	0	0	0	0	0	0	0	0	0	0	0	0	0	0	0	0	0	0	0	0
TCONS_00008414	0	0	0	0	0	0	0	0	0	0	0	0	0	0	0	0	0	0	0	0	0
TCONS_00008431	0	0	0	0	0	0	0	0	0	0	0	0	0	0	0	0	0	0	0	0	0
TCONS_00008450	0	0	0	0	0	0	0	0	0	0	0	0	0	0	0	0	0	0	0	0	0
TCONS_00008460	0	0	0	0	0	0	0	0	0	0.0211061	0	0.846936	0.310094	0.645202	0.565294	0.134725	0.219497	0	0	0	0.155623
TCONS_00008461	0	0	0	0	0.0040889	0	0	0	0	0	0	0	0	0.643332	0	0.103722	0	0.293166	0	0.192577	0
TCONS_00008462	0	0	0	0.0401655	0	0	0	0	0	0	0	0	0.536358	0	0	0	0	0.340797	0.116589	0.153504	0
TCONS_00008464	0	0	0.108223	0	0	0.0371765	0	0	0	0	0.070767	0	0	0.211197	0.136907	0.309892	0.103068	0	0	0.238337	0.550255
TCONS_00008465	0	0	0.0536566	0	0	0	0	0	0.00743158	0.241744	0.173228	0	0	0.153238	0.0969864	0	0.00782942	0	0	0	0
TCONS_00008466	0	0	0	0	0	0.0692198	0.145429	0.021415	0	0	0.109941	0.0663152	0	0.325604	0.209424	0.824777	0	0.669167	0.299228	0.21361	0
TCONS_00008468	0	0	0	0	0	0	0	0	0	0	0	0	0	0	0	0	0	0	0	0.826219	0
TCONS_00008470	0	0	0	0	0	0	0	0	0	0	0	0	0	0	0	0	0	0	0	0.496667	0
TCONS_00008471	0	0.0545326	0	0	0	0	0	0.0905383	0	0	0	0.3038	0.409029	0	0	0.88086	0	0.964892	0.720057	0	0
TCONS_00008472	0	0	0	0	0	0	1.24291	0.216502	0.76844	0	0	0	0	0	0	0	0	0	0	0	0
TCONS_00008473	0	0	0	0	0	0	0	0	0	0	0	0	0	0	0	0	0	0.414809	0	0	0.871828
TCONS_00008474	0	0	0	0	0	0	0.0300732	0	0	0	0	0	0.135513	0	0	0.188238	0	0.108066	0.0840675	0.658739	0.159212
TCONS_00008485	0	0	0	0	0	0	0	0	0	0	0	0	0.160904	0.444828	0	0.03133	0	0.0935007	0	0.132891	0.442364
TCONS_00008527	0	0.033718	0	0.0352484	0	0	0.308669	0	0	0	0	0	0	0	0	0	0.0323	0	0	0	0
TCONS_00008569	0	0	0.160109	0.104903	0.216896	0	0.207006	0.207617	0.371087	0	0.268304	0.149721	0	0	0	0	0	0	0	0	0
TCONS_00008570	0	0	0	0	0	0	0	0	0	0	0	0	0	0	0	0	0	0	0	0	0
TCONS_00008571	0	0	0	0	0	0	0	0	0	0	0	0	1.95536	0	0	0	0	0	0	2.0648	0
TCONS_00008572	0	0	0	0	0	0	0	0	0	0	0	0	0	0	0	0	0	0	0	0	0
TCONS_00008573	0	0	0	0	0	0	0	0	0	0	0	0	0	0	0.704383	0	0	0	0	0	0
TCONS_00008574	0	0	0	0	0	0	0	0	0	0	0	0	0	0	0	0	0	0	0	0	0
TCONS_00008575	0	0	0	0	0	0	0	0	0	0	0	0	0	0	0	0	0	0	0	0	0
TCONS_00008583	0	0	0	0	0	0	0	0	0	0	0	0	0	0	0	0	0	0	0	0	0
TCONS_00008595	0	0.0843835	0	0	0.16527	0	0	0	0	0	0	0	0	0.241213	0	0.0425002	0.239376	0.12524	0.419304	0.0825723	0.0839864
TCONS_00008668	0	0	0	0.0150664	0	0	0	0	0	0	0	0	0	0	0	0	0	0	0	0.285944	0
TCONS_00008692	0	0.124429	0	0	0	0.500872	0	0.481381	0	1.4821	0	0.989224	0	0	0	0	0	0	0	0	0
TCONS_00008696	0	0.0687226	0	0	0.134418	0	0	0	0	0	0	0	0	0	0	0	0	0.0980068	0	0	0
TCONS_00008697	0	0	0	0	0	0	0	0	0	0	0	0	0	0	0	0	0	0	0	0	0
TCONS_00008698	0	0	0	0	0	0	0	0	0	0	0	0	0.993164	0	0	0	0	0	0	0	0
TCONS_00008699	0	0	0	0	0	0	0	0	0	0	0	0	0.427653	0	0	0.754677	0	0	0	0	0
TCONS_00008700	0	0	0	0	0	0	0	0	0	0	0	0	0	0.330218	0	0	0.519621	0	0	0.810144	0
TCONS_00008701	0	0	0	0	0	0	0	0	0	0	0	0	0	0	0	6.12744	8.05373	0	3.29112	8.86456	0
TCONS_00008749	0.195894	0	0	0.137172	0.276368	0.422991	0.0994483	0.238965	0.042764	0	0	0	0	0	0	0	0	0	0	0	0
TCONS_00008760	0	0	0	0	0	0	0	0	0	0	0	0	0	0	0	0	0	0	0	0	0
TCONS_00008767	1.09974	1.20998	0.68709	1.39935	0.912943	0.802112	0.855844	0.906083	0.962462	0.677191	0.922571	1.17137	0.220139	0.0571359	0.132852	0.413928	0.021648	0.119457	0.0327458	0.119824	0
TCONS_00008787	0	0	0	0	0	0	0	0	0	0	0	0	0	0	0	0	0	0	0	0	0
TCONS_00008788	0	0	0	0	0	0	0	0	0	0	0	0	0	0	0	0	0	0	0	0	0
TCONS_00008794	0	0	0	0	0	0	0	0	0	0	0	0	0	0	0	0	0	0	0	0	0
TCONS_00008853	0	0	0	0	0	0	0	0	0	0	0	0	1.86726	0	1.2836	2.19861	2.68228	0	0	0	0
TCONS_00008908	0	0	0	0	0	0	0	0	0.0350355	0	0	0	0.0328903	0	0.146978	0.0949629	0	0	0.103522	0.113505	0.195082
TCONS_00008910	0	0	0.0193393	0	0.0127535	0	0.0362618	0	0	0	0	0.0192269	0.0829362	0	0.260379	0.0946405	0	0	0.354469	0.198627	0.15006
TCONS_00008953	0	0	0	0	0	0	0	0	0	0	0	0	0	0	0	0	0	0	0	0	0
TCONS_00008988	0	0.0104639	0	0	0	0.00389319	0	0	0	0	0	0	0	0.113271	0.105091	0	0	0.176705	0.148437	0.218593	0
TCONS_00008992	0	0	0	0	0	0	0	0	0	0	0	0	0	0.0515995	0.160346	0.0524556	0.021282	0	0	0	0.226313
TCONS_00008997	0	0	0	0	0	0	0	0	0	0	0	0	2.06326	0	0	0	3.31015	2.60415	3.41801	3.44531	9.90963
TCONS_00008998	0	0	0	0	0	0	0	0	0	0	0	0	0	0	0	0	0	0	0	0	0
TCONS_00009001	0.145332	0.127782	0.221779	0.221212	0.14369	0.195472	0.168889	0.171246	0	0.18422	0	0	0	0.30138	0.307009	0.283626	0.345206	0.186394	0.329436	0.295616	0
TCONS_00009004	0	0	0.0113353	0	0	0.00588099	0	0	0.0108326	0	0	0	0	0	0	0	0.038443	0	0	0.443498	0.0560612
TCONS_00009021	0	0	0	0	0	0	0	0	0	0	0	0	0	0	0.220193	0	0.0886776	0.12244	0.0604952	0.088887	0.155836
TCONS_00009048	0	0	0	0	0	0	0	0	0	0	0	0	0	0	0	0	0	0	0	0	0
TCONS_00009052	0	0	0	0	0	0	0	0	0	0	0	0	0	0	0	0	0	0	0	0	0
TCONS_00009078	0.0303941	0.0624471	0.0687043	0.0425531	0.0339457	0	0.032363	0	0.051147	0	0	0	0.110016	0.123147	0.091249	0.158111	0.0910062	0	0.256877	0.03042	0
TCONS_00009094	0	0	0	0	0.101298	0.174243	0	0	0	0	0	0	0	0.0604824	0.0978388	0	0	0	0.018291	0.0271745	0
TCONS_00009135	0	0	0.149432	0.0808335	0.0909484	0.113677	0.0861691	0.0867157	0	0	0	0	0	0.405046	0	0	0	0	0	0	0.151228
TCONS_00009164	0	0	0	0	0	0	0	0.049667	0	0	0	0	0.11327	0	0.0337516	0.265062	0	0	0	0.307117	0.321897
TCONS_00009167	0	0.0410269	0	0	0.0133733	0.00712336	0	0.0396744	0	0	0.00698061	0	0	0.0305539	0.0500097	0.0518389	0	0.0681557	0	0.118979	0
TCONS_00009168	0	0	0	0	0	0	0	0	0	0	0	0	0	0	0	0.3435	0	0	0.741787	0	0
TCONS_00009219	0.385147	0.0566851	0	0.200986	0.284523	0.403986	0.137101	0.198963	0.471701	0.488033	0.319132	0.12269	0.0720033	0.0472285	0.107703	0.168768	0.0211148	0.0294003	0.0435856	0	0.210567
TCONS_00009227	0	0.119982	0	0.116342	0.0612895	0.0746475	0	0	0.0727656	0	0.0684471	0.087479	0.0234405	0	0.0532792	0.0465319	0	0.0308094	0.0421621	0	0.03311
TCONS_00009228	0	0	0	0	0	0	0	0	0	0	0	0	0	0	0	0	0.0302947	0	0	0	0
TCONS_00009229	0	0	0	0	0	0	0.0700102	0	0	0	0	0	0	0.0682221	0	0	0.00993827	0.0336224	0	0	0
TCONS_00009230	0	0	0	0	0	0	0.0525349	0	0	0.174786	0	0	0	0	0	0	0	0	0	0	0.0371203
TCONS_00009267	0	0	0	0	0	0	0	0	0	0	0	0	0.802913	0.144531	0.752607	0.103915	0.138495	0.273084	0.600299	0.508715	0
TCONS_00009282	0	0	0	0	0	0	0	0	0	0	0	0	0.0614826	0	0.0662408	0	0	0	0	0.0170662	0.249212
TCONS_00009301	0	0	0	0	0	0	0	0	0	0	0	0	0	0	0	0	1.67055	0.0780814	0	0.756893	0
TCONS_00009305	0	0	0	0	0	0	0	0	0	0	0	0	0	0	0	0	0.189093	0	0.0852918	0.145396	0.14053
TCONS_00009306	0	0	0	0	0	0	0	0	0	0	0	0	0.0690437	0	0.0944171	0.0344225	0	0.15518	0.07053	0.0640512	0.361007
TCONS_00009337	0	0	0	0	0	0	0	0	0	0	0	0	0	0	0	0	0	0	0	0	0
TCONS_00009350	0	0	0	0	0	0	0	0	0	0	0	0	0	0	1.09759	0.094422	0	0	0	0	0
TCONS_00009353	0	0	0	0	0	0	0	0	0	0	0	0	0.404092	0.261223	0.115474	0.252965	0.303239	0.237872	0.24719	0.751472	0.447413
TCONS_00009377	0	0.0733922	0	0	0	0	0	0	0	0	0	0	0	0	0	0	0	0.556216	0	0	0
TCONS_00009408	0	0	0.00414826	0	0	0	0	0	0	0	0	0	0	0.402919	0.165934	0.215646	0.255284	0.172154	0.28562	0.0617429	0
TCONS_00009559	0	0	0	0	0	0	0	0	0	0	0	0	0	0.128828	0.186268	0.346445	0.304099	0	0	0	0.261123
TCONS_00009611	0	0	0	0	0	0	0	0	0	0	0	0	0	0	0	0	0	0	0	0	0
TCONS_00009647	0	0	0	0	0	0	0	0	0	0	0	0	0	0	0	0	0	0	0	0	0
TCONS_00009648	0	0	0	0	0	0	0	0	0	0	0	0	0	0	0	0	0	0	0	0	0
TCONS_00009651	0	0	0	0	0	0	0	0	0	0	0	0	0	0	0	0	0	0	0	0	0
TCONS_00009697	0	0	0	0	0	0	0	0	0	0	0	0	0.0324072	0.175015	0.178644	0.0321198	0.162789	0.0926088	0.155704	0.153901	0.540292
TCONS_00009718	0.0429195	0	0	0.0242404	0	0	0.0442215	0	0	0	0	0.0930695	0.0697413	0	0	0	0	0.0205966	0.0829962	0.0411648	0.361721
TCONS_00009892	0	0	0	0	0	0	0	0	0	0	0	0	1.0412	1.4394	0	0	1.60353	0	1.21108	2.18024	1.86704
TCONS_00010017	0.0974986	0	0	0	0	0	0.189355	0	0	0	0	0	0	0	0.624357	0.654836	0	0.847809	0	0.534786	0.94361
TCONS_00010018	0	0	0	0	0	0	0	0	0	0	0	0	0	0	0	0	0	0	0	0	0
TCONS_00010021	0	0	0	0	0	0	0	0	0	0	0	0	0	0	0	0	0	0	0	0	0
TCONS_00010022	0	0	0.00532637	0	0	0.00562635	0.0152954	0	0	0	0	0	0.146639	0.188835	0.136656	0.14096	0.359528	0.108146	0.206866	0.166608	0.167556
TCONS_00010054	0	0	0	0.172329	0	0.172867	0	0	0	0	0	0.359672	0.307428	0	0	0.276266	0	0.143918	0	0.492349	0
TCONS_00010055	0	0	0.169644	0	0	0	0	0.0843617	0.116316	0.0493873	0.492307	0.193566	0	0	0.545875	0.0491119	0.291138	0	0	0	0
TCONS_00010150	0.139197	0.316106	0.161324	0.163458	0	0.321143	0	0	0	1.01041	0	0	0.278946	0	0.963042	0.269591	1.32637	1.84589	0.624698	0.708996	0.496987
TCONS_00010311	0	0.347281	0	0	0	0	0	0	0	0	0	0	0	0	0	0	0	0	0	0	0
TCONS_00010348	0	0	0	0	0	0	0	0	0	0	0	0	0	0	0	0	0	0	0	0	0
TCONS_00010349	0	0	0	0	0	0	0	0	0	0	0	0	0	0	0	0	0	0	0	0	0
TCONS_00010350	0	0	0	0	0	0	0	0	0	0	0	0	0	0	0	0	0	0	0	0	0
TCONS_00010354	0	0	0	0.0455903	0	0	0	0	0	0	0	0	0	0	0	0	0	0	0	0	0
TCONS_00010355	0	0	0	0	0.0572666	0	0	0	0	0	0	0.0195695	0	0	0	0	0.610273	0	0	0	0
TCONS_00010390	0	0	0	0	0	0	0	0	0	0	0	0	0	0	0	0	0	0.774804	0	0	0
TCONS_00010391	0	0	0	0	0	0	0	0	0	0	0	0	1.07919	2.3829	1.66661	0.742343	2.12602	1.23506	1.96448	5.96269	5.61285
TCONS_00010392	0	0	0	0	0	0	0	0	0	0	0	0	0.732387	1.51909	0	0	2.67612	0	1.18606	3.69348	2.62809
TCONS_00010393	0	0	0	0	0	0	0	0	0	0	0	0	0.487281	0	0.809129	0.244776	0	0	0	1.96739	2.98167
TCONS_00010394	0	0	0	0	0	0	0	0	0	0	0	0	1.52892	0	0	0.493696	0	0	2.81147	0	4.01871
TCONS_00010408	0	0	0	0	0	0	0	0	0	0	0	0	0	0	0	0	0	0	2.34756	0	0
TCONS_00010526	0	0	0	0	0	0	0	0	0	0	0.00861523	0.0341735	0.0183575	0	0	0	0	0	0.137943	0.0400476	0
TCONS_00010527	0	0	0	0	0	0	0	0	0.050915	0	0	0	0	0.16079	0	0.229937	0.109883	0.0433144	0.130499	0.0800547	0.179425
TCONS_00010532	0	0	0	0	0	0	0	0	0	0	0	0	0.924326	0.350838	0.776912	0	0.469828	0	1.59788	1.08188	0
TCONS_00010543	0	0.0327396	0	0	0	0	0	0	0	0	0	0	0.0608044	0	0.0646879	0.053406	0.105361	0	0	0.0253717	0.462788
TCONS_00010552	0	0	0	0	0	0	0	0	0	0	0	0	0	0	0	0	2.48524	0.320645	0	0	0
TCONS_00010554	0	0	0	0	0	0	0	0	0	0	0	0	0.46595	0.583931	0.0991378	0.0267129	0.330708	0.315174	0.304351	1.50321	0.918901
TCONS_00010558	0	0	0	0	0	0	0	0	0	0	0	0	0.803602	0.665457	0.556283	0.387586	1.7631	0.486281	0.97934	1.38813	2.83461
TCONS_00010559	0	0.0320337	0	0	0	0	0	0.156574	0	0	0	0	0	0.161095	0.235085	0	0	0	0	0	0
TCONS_00010560	0	0	0	0	0	0	0	0	0	0	0	0	0	0	0.297643	0	0	0.0888456	0.635688	0	0
TCONS_00010591	0	0.0567639	0	0.119578	0	0.0566498	0	0	0	0	0	0	0	0	0.144725	0	0.066395	0	0	0	0
TCONS_00010592	0	0	0	0	0.074183	0	0	0	0	0	0	0	0	0	0	0	0	0	0	0	0
TCONS_00010677	0.199891	0.070373	0.264095	0.278076	0.152648	0.148839	0.0511475	0.123305	0.161461	0	0.223202	0.311323	0.874444	0.824566	0.854494	0.60677	0.242046	0.9025	0.400921	0.327712	0.578605
TCONS_00010720	0	0	0	0	0	0	0	0	0	0	0	0	0.193473	2.33461	0	0	0	0	0	0	0
TCONS_00010729	0	0	0	0	0	0	0	0	0	0	0	0	0	0	0	0	0	0	0	0	0
TCONS_00010756	0	0	0	0	0	0	0	0	0	0	0	0	0	0	0	0	0	0	0	0	0
TCONS_00010853	0	0	0.15733	0	0	0	0	0.20106	0	0	0	0	0.0184635	0	0	0	0	0	0	0	0
TCONS_00010871	0.200368	0.0812427	0	0.076224	0.0607436	0.115882	0.108697	0	0.146032	0.10543	0.0566748	0.122755	0	0	0	0.0486506	0	0	0	0	0
TCONS_00010872	0.262839	0.2096	0.167702	0.239362	0.267293	0.237234	0.178323	0.221338	0	0.254236	0.285141	0.319512	0	0.138323	0	0.124489	0	0.161724	0	0	0
TCONS_00010873	0	0	0.131273	0.0894622	0.106611	0.153371	0	0.367451	0	0.30424	0	0	0.0821073	0.0746306	0	0.0860543	0	0	0	0	0
TCONS_00010874	0	0	0	0	0	0	0.12077	0	0.227001	0.155748	0.195872	0.236411	0.0686922	0.0467135	0	0	0.0805644	0	0	0.0863051	0
TCONS_00010875	0.275968	0.236419	0.310882	0.215727	0.180071	0.160287	0.186631	0.267247	0.226053	0.0891632	0.0524003	0.222723	0	0	0.112692	0	0	0.085977	0	0	0
TCONS_00010895	0	0	0	0.0138072	0	0.0346196	0.0037841	0.0106952	0.0375765	0.0264366	0	0	0	0	0	0.0830787	0	0	0	0	0
TCONS_00011073	0	0	0	0	0	0	0	0	0	0	0	0	0	0	49.3993	0	28.6465	19.6571	0	35.5011	34.0303
TCONS_00011074	0	0	0	0	0	0	0	0	0	0	0	0	0	0	0	0	0	0	0	10.5207	13.3746
TCONS_00011276	0	0	0	0	0	0	0	0	0	0	0	0	0	0.900788	0	0.315579	0.901449	1.20457	1.12105	0.996089	1.11885
TCONS_00011320	0	0	0	0	0	0	0	0	0	0	0	0	0.149925	0.0725146	0	0.0722836	0.990255	0.0366614	0.282137	0.498201	0.160902
TCONS_00011404	0.115586	0.121838	0	0.197206	0	0	0	0.18253	0.0574463	0.285474	0.0612653	0.169643	0	0	0	0	0	0.218394	0.142167	0.162987	0
TCONS_00011427	0.0322631	0.0518035	0.113724	0.186186	0.0759014	0.0267555	0.103143	0.229766	0.00795499	0.0215905	0	0.286551	0.256292	0.394171	0.202208	0.0733022	0.105679	0.137536	0.0773301	0.140265	0.106592
TCONS_00011438	0	0.42963	0	0	0	0	0	0	0	0	0	0	0	0	0	0	0	0	0	0	0
TCONS_00011482	0.0217713	0	0.0122234	0	0	0	0	0	0	0	0	0	0.0818956	0.0366127	0.0640582	0.102664	0	0.0411977	0	0.0311838	0.200781
TCONS_00011531	0	0.266087	0.116403	0.207469	0.320169	0.175875	0.179476	0.258743	0.332632	0.129763	0.152275	0.17166	0.0372958	0.0388544	0.105029	0.242139	0.0453738	0.098764	0.0705191	0.0823261	0.0418295
TCONS_00011556	0.132966	0.0207436	0	0.105624	0.0404769	0	0	0	0.0190398	0	0	0	0.19365	0	0	0.538705	0.0525818	0	0.154945	0	0
TCONS_00011565	0	0	0	0.0566652	0.0337371	0	0	0	0	0.00625404	0	0.0468051	0	0.0307123	0	0	0	0	0	0	0.0989391
TCONS_00011567	0	0	0	0.0426923	0.0403957	0	0	0	0	0	0	0	0.0985613	0.116328	0.0725082	0	0.380827	0.199118	0.91611	0.30094	0.394904
TCONS_00011576	0	0	0	0	0	0	0	0	0	0	0	0	0	0	0	0	0	0	0	0	0
TCONS_00011577	0	0	0	0	0	0	0	0	0	0	0	0	1.2388	0.12732	0	0	0	0.300441	0.905772	0.740559	0
TCONS_00011578	0	0.171653	0.0862183	0.262758	0.165723	0	0	0	0	0.651409	0	0	0	0	0	0	0	0	0.597595	0.742642	0
TCONS_00011582	0	0	0	0	0	0	0	0	0	0	0	0	0	0.152014	0	0	1.75683	0.951348	0.839899	0	0
TCONS_00011586	0	0	0	0	0	0	0	0	0	0	0	0	0.266408	0.102077	0.649477	0.151745	0.90116	0.240984	0.491402	0.968658	1.48426
TCONS_00011587	0	0	0	0	0	0	0	0	0	0	0	0	0	0	0	0	0.580614	0.270429	0.631137	0	2.41993
TCONS_00011642	0	0	0	0	0	0	0	0	0	0	0	0	0.260189	0.412683	0	0	0.0252611	0.366029	0.490032	0	0.621467
TCONS_00011644	0	0	0	0	0	0	0	0	0	0	0	0	0	0.725463	0	1.48408	0.476567	0	0	0	0.541545
TCONS_00011786	0.565101	0	0.439858	0.233082	0.211029	0.668615	0	0	0.789706	0	0	0.913637	4.3258	7.48551	5.56448	2.81147	9.80537	3.01869	4.93175	10.5978	7.94868
TCONS_00011875	0	0	0	0	0	0	0	0	0	0	0	0	0	0	0	0	0	0	0	0	0
TCONS_00011929	0	0	0	0	0	0	0	0	0	0	0	0.0499538	0	0	0	0	0	0	0	0	0
TCONS_00011930	0	0	0	0	0	0	0	0	0	0	0	0	0	0	0	0	0	0	0	0	0
TCONS_00011931	0	0	0	0	0	0	0	0	0	0	0	0	0	0.793602	0	0	0	0	0.763538	0	0
TCONS_00011932	0	0	0	0	0	0	0	0	0	0	0	0	0	0	0	0	0	0	0	0	0
TCONS_00011933	0	0	0.00576543	0	0	0	0	0	0	0	0	0	0	0	0	0	0.58963	0.409711	0.637903	0.341267	1.30892
TCONS_00011936	0	0	0	0	0	0	0	0	0	0	0	0	0	0	0	0	0	0	0	8.12732	0
TCONS_00011941	0	0	0	0	0	0	0	0	0	0	0	0	0	0	0	0	0	0	0	0	0
TCONS_00011942	0	0	0	0	0	0	0	0	0	0.00537883	0	0	0	0	0	0	0	0	0	0	0
TCONS_00011943	0	0	0	0	0	0	0	0	0	0	0	0	0	0	0	0	0	0	0	0	0
TCONS_00011944	0	0	0	0	0	0	0	0	0	0	0	0	0	0	0	0	0	0	0	0	0
TCONS_00011945	0	0	0	0	0	0	0	0	0	0	0	0	0	0	1.23036	0	0	0.864051	0.962502	0.836127	0
TCONS_00011947	0	0	0	0	0	0	0	0	0	0	0	0	1.10274	0	0	0.504641	0.647347	0.783843	0	0.483621	1.86863
TCONS_00011948	0	0.0195801	0	0	0	0	0	0	0	0	0	0	5.1998	5.28519	5.41015	0	6.5202	2.8524	3.6162	3.70895	0
TCONS_00011949	0	0	0	0.0199906	0	0	0	0	0	0	0	0.0762771	0	0	0	0	0	0	0	0	0
TCONS_00012021	0.265482	0.21104	0.342265	0.222057	0.150192	0.147273	0.0854396	0.109021	0.115368	0.0272062	0.0335386	0.0497584	0	0.0471534	0.0988759	0.0729062	0.0827552	0	0.0432136	0.08118	0.265928
TCONS_00012031	0	0	0	0	0	0	0	0	0	0	0	0	0	0	0	0	0	0	0	0	0
TCONS_00012120	0.224701	0	0.093848	0.802717	0.0790416	0.182117	0	0	0.0407981	0.179561	0	0	0	0	0	0.0473132	0	0	0	0	0
TCONS_00012317	0.339254	0.644704	0.863996	1.47432	0.442016	0.67914	0.262607	0.769459	0.470261	0.121345	0.0715852	0.23173	0.0378017	0.05836	0.0531752	0.205672	0.0194812	0.156326	0.0198195	0.0104634	0.102918
TCONS_00012385	0	0	0	0	0	0	0	0	0	0	0	0	0.0666853	0	0	0	1.04453	0	0	0.0583619	0
TCONS_00012408	0	0	0	0	0	0.10136	0	0	0	0	0	0	0	0	0	0.0744122	0	0.0463825	0.168242	0	0.960663
TCONS_00012411	0	0	0	0	0	0	0	0	0	0	0	0	0	0.146959	0	0	0	0	0	0	0
TCONS_00012415	0	0	0.0150986	0.0311842	0.046728	0.0321027	0.0437758	0.0144673	0.0582775	0	0.178777	0.044406	0.0473649	0	0	0.153535	0.076076	0.13747	0.0465548	0.0314312	0
TCONS_00012489	0.0210225	0.0232752	0.0700789	0	0	0	0.0214978	0	0	0	0	0	0	0	0	0	0	0	0	0	0
TCONS_00012576	0	0	0	0	0	0	0	0	0	0	0	0	0.022767	0.245806	0	0	0	0	0.191062	0.0497975	0.153022
TCONS_00012836	0	0	0	0	0	0	0	0	0	0	0	0	0	0	0	0	0	0	0	0	0
TCONS_00012837	0	0	0	0	0	0	0	0	0	0	0	0	0	0	0	0	0	0	0	0	0
TCONS_00012838	0	0	0	0	0	0	0	0	0	0	0	0	0	0	0	0	0.977128	0	0	0	0.646858
TCONS_00012839	0	0	0	0	0	0	0	0	0	0	0	0	0.681743	0	0	0	0	0	0.984248	0.878047	0
TCONS_00012917	0	0	0	0.00767786	0	0	0	0	0	0	0	0	0	0	0	0	0	0.0246405	0.0807884	0.100333	0
TCONS_00012944	0	0	0	0	0	0	0	0	0	0	0	0	0	0	0	0	0	0	0	0	0
TCONS_00012946	0	0	0	0	0	0	0	0	0	0	0	0	0	0	0	0	0	0	0	0	0
TCONS_00012990	0	0	0	0	0	0	0	0	0	0	0	0	0.122083	0.27603	0.113392	0.0704276	0.154831	0.170834	0.0569596	0.199151	0.469839
TCONS_00012998	0.21223	0.283677	0.154357	0.298415	0.0533759	0.12616	0.0896921	0	0.0369958	0.134931	0.342118	0.0383829	0.0709965	0.109262	0.102444	0.210868	0.026689	0.0545523	0.0698201	0.0278515	0.175676
TCONS_00013054	0.621141	0.340838	0.412157	0.634368	1.12141	1.06015	1.23281	0.880473	0	1.20913	1.46456	0.617285	1.94189	1.70722	0.757863	2.23099	0.458184	1.58749	1.13101	2.19122	3.04165
TCONS_00013066	0	0	0	0	0	0	0	0	0	0	0	0	0	0	0	0	0	0	0	0	0
TCONS_00013207	0.0454802	0.0512339	0	0.0510569	0	0.0253582	0.161664	0	0	0.209566	0	0	0.78768	0	0.845432	0	0	0	0	0	0
TCONS_00013210	0	0	0	0	0	0	0	0	0	0	0	0	0	0	0	0	0	0	0	0	0
TCONS_00013212	0	0	0	0.0249871	0.0282421	0	0	0	0	0	0	0.00533541	0	0	0	0	0	0	0	0.100922	0.152098
TCONS_00013213	0	0.0100792	0	0	0	0	0	0	0	0	0	0.00429101	0	0	0	0	0	0	0	0	0
TCONS_00013214	0	0	0	0	0.0153161	0	0	0	0	0	0	0	0.161568	0.114006	0.0773344	0.0990923	0.309439	0	0	0.304347	0.0515682
TCONS_00013215	0	0	0.0145454	0	0.00771975	0	0.0185061	0	0.0415503	0	0.0328605	0	0	0.226925	0.0710612	0	0	0.15308	0.0781884	0	0
TCONS_00013216	0	0	0	0	0	0	0	0	0	0	0	0	0.2908	0.155218	0.69025	0.143005	0.482741	0.625161	0.535441	1.03918	0.890424
TCONS_00013217	0	0	0	0	0	0	0	0	0	0	0	0	1.42265	1.81466	0.801342	0.333948	0.744245	0.728401	0.543877	2.52639	1.27846
TCONS_00013237	0	0.172303	0.0516124	0.0846283	0	0.196148	0.107815	0	0.159808	0.163587	0.293482	0.275504	0.0365592	0.0306981	0.0487909	0.137844	0	0.158261	0.0148512	0.0595295	0.0112486
TCONS_00013238	0	0	0	0.0890177	0.329144	0.0821354	0	0	0	0.204849	0	0	0	0	0	0	0.0546072	0	0	0	0
TCONS_00013364	0	0	0	0	0	0	0	0	0	0	0	0	0	0	0.174874	0.0296281	0.525862	0.281252	0.324972	0.679745	0
TCONS_00013367	0	0	0	0	0	0	0	0	0	0	0	0	0.0790479	0.0225701	0.10703	0.0415873	0	0.0312661	0.226998	0	0
TCONS_00013452	0	0	0	0	0	0	0	0	0	0	0	0	0.62413	0	0.307157	0.242348	0.332403	0	0	0	0.417618
TCONS_00013453	0	0	0	0	0	0	0.00816177	0.00208246	0	0	0	0	0	0	0	0	0	0	0.161632	0.21834	0.13879
TCONS_00013455	0	0	0	0	0	0	0	0	0	0	0	0	0	0.397138	0	0	0	0	0	0	0
TCONS_00013456	0	0	0	0	0	0	0	0	0	0	0	0	0	1.39108	2.46776	1.1635	1.80301	2.04194	1.14866	1.88354	1.39686
TCONS_00013460	0	0	0	0	0	0	0	0	0	0	0	0	0	0	0	0	0	0	0	0	0
TCONS_00013461	0	0	0	0	0	0	0	0	0	0	0	0	0	0	0	0	0	0	0	0	0
TCONS_00013462	0	0	0	0	0	0	0	0	0	0	0	0	0	0	0	0	0	0	0	0	0
TCONS_00013463	0	0	0	0	0	0	0	0	0	0	0	0	0	0	0	0	0	0	0	0	0
TCONS_00013464	0	0	0	0	0	0	0	0	0	0	0	0	0	0	0	0	0	0	0	0	0
TCONS_00013465	0	0	0	0	0	0	0	0	0	0	0	0	0	0	0	0	0	0	0	0	0
TCONS_00013466	0	0	0	0	0	0	0	0	0	0	0	0	0	0	0	0	0	0	0	0	0
TCONS_00013467	0	0	0	0	0	0	0	0	0	0	0	0	0	0.478794	0	0	0	0	0	0	0
TCONS_00013578	0	0	0	0	0	0	0	0	0	0	0	0	1.24356	0	0	0	0.463341	0	0	0.114913	1.97434
TCONS_00013644	0	0	0	0	0	0	0	0	0	0	0	0	0	0	0	0	0	0	0	0	0.362812
TCONS_00013647	0	0	0	0	0	0	0	0	0	0	0	0	0	0	0	0	0	0	0	0	0
TCONS_00013852	0	0.0131526	0	0	0	0	0	0	0	0	0	0	0	0	0.122823	0.0577434	0	0	0	0	0.546396
TCONS_00013853	0	0	0	0	0	0	0	0	0	0	0	0	0	0.0203866	0	0.227129	0	0.11243	0	0.186344	0.424026
TCONS_00013858	0	0	0	0	0	0	0	0	0	0	0	0	0	0	0	0	0	0	0	0.772278	0
TCONS_00013859	0	0	0	0	0	0	0	0	0	0	0	0	0.0452072	0.0285672	0.149183	0.0453047	0	0	0	0.0892046	0.284593
TCONS_00013860	0	0	0	0.0178671	0.0167916	0	0	0	0	0	0	0	0	0	0	0	0	0	0.0728871	0	0
TCONS_00014015	0	0	0	0	0	0	0	0	0	0	0	0	0	0	0	0	0	0	0	0	0
TCONS_00014016	0	0	0	0	0	0	0	0	0	0	0	0	0	0	0	0	0	0	0	0	0
TCONS_00014022	0	0	0	0	0	0	0	0	0	0	0	0	0	0	0	0	0	0	0	0	0
TCONS_00014062	0	0	0	0	0	0	0	0	0	0	0	0	0.280908	0	0.615351	0	0.758608	0	1.0167	1.41953	1.03721
TCONS_00014063	0	0	0	0	0	0	0	0	0	0	0	0	0	0.388042	0	0	1.46558	0.285432	0	0	0
TCONS_00014064	0	0	0.0261674	0	0	0	0	0	0	0	0	0	0	0	0	0	0	0	0	0	0
TCONS_00014065	0	0	0	0	0	0	0	0	0	0	0	0	0.605151	0	0.473929	0	0	0.415506	0	0.632306	0
TCONS_00014071	0	0	0	0	0	0	0	0.10468	0	0	0	0	0	0	0	0	0	0	0	0	0
TCONS_00014072	0	0	0	0	0	0	0	0	0	0	0	0	0	0	0	0	0	0	0	0	0
TCONS_00014073	0	0	0	0	0	0	0	0	0	0	0	0	0	0	0	0	0	0	0	0	0
TCONS_00014215	0	0	0	0	0	0.235857	0	0	0	0	0	0	0	0	0	0	0	0	0	0	0
TCONS_00014224	0.0377376	0.0405271	0.0405964	0	0	0	0	0	0	0	0	0	0.150447	0.620223	0	0.13492	0.291501	0.200764	0.259538	0.226067	0
TCONS_00014293	0	0	0	0	0	0	0	0	0	0	0	0	0	0	0	0	0	0	0	0	0
TCONS_00014338	0	0	0	0	0	0	0	0	0	0	0	0	4.74708	0	13.6918	1.89672	9.10885	13.0076	2.45656	37.6106	0
TCONS_00014417	0.270029	0.115753	0	0.294215	0	0	0	0	0	0.18741	0	0.0898052	0	0.079681	0	0	0.00557731	0.0353435	0	0	0
TCONS_00014559	0	0	0	0	0	0	0	0	0	0	0	0	0	0	0	0	0.219622	0	0	0	0
TCONS_00014560	0	0	0	0	0	0	0	0	0	0	0	0	0	0	0	0	0	0	0	0	0
TCONS_00014713	0	0	0	0	0	0	0	0.0455879	0	0	0.123372	0.0377996	0	0	0.155602	0	0	0	0	0	0
TCONS_00014714	0	0	0	0	0	0	0	0	0	0	0	0	0.166032	0	0	0	0.140733	0.150063	0.220069	0.130517	0.164071
TCONS_00014715	0	0	0	0	0	0	0	0	0	0	0	0	0	0	0	0	0	0	0	0	0
TCONS_00014842	0.0715983	0.423206	0.338891	0.027026	0.0777109	0.0280939	0.1015	0	0.273887	0	0.125855	0	0	0.025097	0	0.0484292	0.122795	0	0.125442	0.200301	0
TCONS_00014921	0	0	14.1546	11.6378	0	9.03672	8.88938	4.55877	0	0	0	0	0.217889	1.6913	0	2.57662	0.259114	1.74111	0.980203	0.31042	0
TCONS_00014930	7.32396	4.40651	9.72771	8.08065	6.58595	6.75938	6.08928	8.27778	4.20199	0	3.38166	1.46141	1.6624	1.44425	0.962872	0	0.3806	1.9409	1.46932	0.828725	1.41011
TCONS_00014957	0	0	0	0	0	0	0	0	0	0	0	0	0	0	0	0	0	0	0	0	0
TCONS_00014958	0	0	0	0	0	0	0	0	0	0	0	0	0	0	0	0	0	0	0	0	0
TCONS_00014968	0	0.101665	0	0	0.105143	0.0945034	0.107345	0.0634909	0	0	0	0	0	0.0956042	0.10652	0	0.0449862	0.0686721	0.0302766	0.0540004	0.294754
TCONS_00015019	0	0	0	0	0	0	0	0	0	0	0	0.0147002	1.64448	2.9449	1.54606	0.856175	1.51493	1.24164	2.3073	2.64095	2.20536
TCONS_00015020	0	0	0	0	0.0203197	0	0	0	0	0	0	0	0.644834	0	1.31221	0.54817	1.21124	1.52485	1.4396	1.03584	1.1184
TCONS_00015021	0	0	0.030637	0	0	0	0	0	0	0	0	0.0149036	0	0	0.377618	0	0	0	0	0	1.1274
TCONS_00015030	0.01264	0.0137981	0	0.0424859	0.0268909	0.153154	0.13962	0	0.187834	0.174769	0	0.199033	0.0515936	0	0.0847331	0.0112626	0.0892515	0.0111365	0.0985794	0.0649921	0.16332
TCONS_00015084	0	0	0	0	0	0	0	0.0210415	0	0	0	0	1.18513	0	0	0.772268	3.5668	2.41637	1.33139	5.74633	3.91282
TCONS_00015100	0	0	0	0	0	0	0	0	0	0	0	0	0.226668	1.66416	1.73369	0.843668	2.51508	0.230535	2.37619	1.58537	3.68961
TCONS_00015104	0	0	0	0	0	0	0	0	0	0	0	0	0	0	0	0	0	0	0	0	0
TCONS_00015105	0	0	0	0	0	0	0	0	0	0	0	0	3.90695	5.70421	5.69962	2.68759	11.9274	7.74537	8.88825	13.1964	13.2382
TCONS_00015106	0	0	0	0	0	0	0	0	0	0	0	0	0	0	3.47115	1.94602	0	0	0	0	0
TCONS_00015107	0	0	0	0	0	0	0	0	0	0	0	0	0	0	0	0	0	0	0	0	0
TCONS_00015109	0	0	0.0151611	0	0	0	0	0	0	0	0	0	0.266253	0	0	0	0.626816	0	0.183575	0	0
TCONS_00015131	0	0	0	0	0	0	0	0	0	0	5.21923	0	0	0	0	0	17.0566	0	0	0	1.78853
TCONS_00015230	0	0	0	0	0	0	0	0	0	0	0	0	0	0	0	0	0	0	0	0	0
TCONS_00015231	0	0	0.0117961	0	0.0180511	0	0	0.0160348	0	0	0	0	0.497386	0.469234	0.635991	0.48623	0.298988	0.732711	0.420706	0.648684	0.601351
TCONS_00015257	0	0.0395062	0	0	0	0	0	0	0	0	0	0	0.166664	0	0.221174	0.101762	0	0.0328985	0.145005	0.0320284	0.477201
TCONS_00015266	0.00993215	0	0.00866235	0	0	0.00759616	0	0	0	0	0	0	0	0	0.0368932	0.131855	0.0622788	0.299437	0.240129	0.236341	0.685101
TCONS_00015267	0	0	0	0	0.0178923	0	0	0	0	0	0	0	0	0	0	0	0	0	0	0	0
TCONS_00015272	0	0.154623	0	0	0	0	0	0	0	0	0	0	0.182056	0.385521	0.649394	0.287424	1.09881	0.697704	0.887832	1.40375	1.1105
TCONS_00015288	0	0	0	0	0	0	0	0	0	0	0	0	0	0	0	0	0	0	0	0	0
TCONS_00015292	0	0	0	0	0	0	0	0	0	0	0	0	0	0	0	0	0	0	0	0	0
TCONS_00015294	0	0	0	0	0	0	0	0	0	0	0	0	0	0	0	0	0	0	0	0	0
TCONS_00015295	0.00935887	0	0.0101938	0.00261355	0.00239385	0.010404	0	0	0	0	0	0	0	0	0.0709662	0	0	0	0	0.0887999	0
TCONS_00015306	0	0	0	0	0	0	0	0	0	0	0	0	0	0	0	0	0.682846	0	0	0	0
TCONS_00015325	0	0.0146534	0	0.0150192	0	0	0	0	0	0	0	0	0	0	0	0.0512675	0	0	0	0	0.290952
TCONS_00015437	0	0	0	0	0	0	0	0	0	0	0	0	0	0	0	0	0.305507	0	0	0	0
TCONS_00015445	0	0	0	0	0.0275711	0	0.013313	0.0710488	0	0	0	0.0497403	0	0	0	0	0	0.126824	0	0	0
TCONS_00015446	0	0	0	0	0	0	0	0	0	0	0	0	0	0	0	0	0	0	0	0.262846	0
TCONS_00015490	0	0.087619	0	0	0	0	0	0	0	0	0	0	0	0.284353	0	0	0.152542	0.11015	0	0.476627	0.0739074
TCONS_00015593	0	0	0	0	0	0	0	0	0	0	0	0	0	0	0	0	0.21462	0	0	0.231519	0
TCONS_00015594	0	0	0	0	0	0	0	0	0	0	0	0	0	0	0	0.315736	0	0	0.211139	0	0
TCONS_00015595	0	0	0	0	0	0	0	0	0	0.182925	0	0	0.179135	0	0	0	0	0	0	0.370882	0
TCONS_00015600	0.0132701	0	0	0	0	0	0	0.0260258	0	0.0641067	0.0392658	0.0239971	0.0526464	0.11265	0.160248	0.148236	0	0	0.0714574	0	0.0627764
TCONS_00015601	0	0.0412825	0.101339	0.0466661	0.0522902	0	0.0307007	0.0494741	0.035502	0	0.0267054	0.0937201	0	0	0	0	0	0	0	0	0
TCONS_00015602	0	0	0	0	0	0	0	0	0	0	0.0561999	0	0	0	0	0	0.0995831	0.0675333	0	0	0
TCONS_00015603	0	0	0	0	0	0	0	0	0	0	0	0	0	0	0	0	0	0	0.0666266	0	0
TCONS_00015604	0	0	0	0	0	0	0	0	0	0	0	0	0	0	0	0	0	0	0	0	0
TCONS_00015605	0.0330113	0	0	0	0.0145782	0.0164033	0	0.0237511	0.0256722	0	0.0186508	0	0.0376063	0	0	0	0	0	0	0	0
TCONS_00015606	0	0	0	0	0	0	0	0	0	0.101873	0	0	0	0	0.046575	0	0	0	0	0	0
TCONS_00015884	0	0	0	0	0	0	0	0	0	0	0	0	0.873418	0.309666	0.336434	0.298149	0.381483	0	0.267837	0.414672	0.402053
TCONS_00015890	0.01813	0.0635778	0.0396401	0.112597	0.0826888	0.0217801	0.0887322	0.0202973	0.0295108	0.105218	0.253436	0.0399257	0.133159	0	0	0.0411575	0.0106056	0	0.0545483	0.0219898	0.0944458
TCONS_00015965	0.419348	2.02595	0.127345	0	0	0	0	0	0	0	0	0	0	0	0	0	0	0	0.231322	0	0.0771078
TCONS_00015997	0	0	0	0	0	0	0	0	0	0	0	0	0.20704	0	0	0	0	0.400402	0	0.0496973	0
TCONS_00016019	0.0581594	0	0	0	0	0	0	0	0	0	0	0	0	0	0	0	0	0	0	3.03967	0
TCONS_00016020	0	0	0	0	0	0	0	0	0	0	0	0	0	0	0	0	0	0	0	0	0
TCONS_00016021	0	0	0	0	0	0	0	0	0	0	0	0	1.67364	1.37337	0	0	3.65664	0	0	2.47693	3.26964
TCONS_00016022	0	0	0	0	0	0	0	0	0	0	0	0	0	0	0	0.25716	0	0	0	0	0
TCONS_00016023	0	0	0	0	0	0	0	0	0	0	0	0	0.798489	0.807815	1.51129	1.08979	3.63554	0.996671	3.58277	2.75507	3.35552
TCONS_00016024	0	0	0	0	0.0176398	0.0186928	0.0334671	0.0691931	0.0507696	0	0	0	0	0	0	0.376117	0	0	0	0	0.852682
TCONS_00016030	0	0	0	0	0	0	0	0	0	0	0	0	0.523109	0	0	0.402945	0	0.533902	0	0.681991	0
TCONS_00016033	0	0	0	0	0	0	0	0	0.0494218	0	0	0	0.782697	0.773173	0.639648	0	1.44435	0.497876	0.837771	0	0.344796
TCONS_00016034	0	0.0131229	0.0793188	0	0	0.0133984	0	0	0	0	0	0	0	0	0	0	0	0.311287	0	0	0
TCONS_00016126	0.050785	0.0302596	0.0431545	0.0696997	0.0296829	0.103294	0.155829	0.0485275	0.0171344	0.104534	0.0120749	0.0544451	0.684865	0.722049	0.764292	0.520811	0.796288	0.683716	0.796125	0.91973	1.22854
TCONS_00016220	0	0	0	0	0	0.0126165	0	0.00586648	0	0	0	0	0.297341	0	0	0.281825	0.296007	0	0.622258	0	0
TCONS_00016221	0	0	0	0	0	0	0.0059446	0	0	0	0	0	0.386841	0.382631	0.095355	0.221482	0.223503	0.600679	0.673111	0.380259	1.69949
TCONS_00016254	0.557406	0	0	0	0	0	0.229148	0	0.0335578	0	0	0	0	0	0	0	0	0	0	0	0
TCONS_00016272	0	0	0	0.0956391	0	0.0488879	0	0.0459449	0	0	0	0	0	0	0	0	0	0	0	0	0
TCONS_00016273	0	0	0	0	0	0	0	0	0.0336612	0.388335	0	0	0	0.36629	0	0	0	0.447746	0	0	0
TCONS_00016279	0.0460089	0	0.0509872	0	0	0	0	0	0	0	0	0	0.521128	0.259536	0.288607	0	1.2918	0.542264	0	0	0
TCONS_00016280	0	0.133111	0	0.324909	0	0	0	0	0.0403523	0	0	0	0	0	0.449876	0	0	0	0	0	0
TCONS_00016432	0	0	0	0	0	0	0	0	0	0	0	0	0	1.19645	0	0	0	0	0.116812	0	0
TCONS_00016569	0	0	0	0	0	0	0	0	0	0	0	0	0	0	0	0	0	0	0	0	0
TCONS_00016604	0	0	0	0.125034	0	0	0	0.0776314	0	0	0	0	0.143551	0	0	0	0	0	0.265806	0.202307	0
TCONS_00016695	0	0.0208262	0.0588082	0	0	0	0	0	0.0191294	0	0	0	0	0	0	0	0	0.69199	0	0	0
TCONS_00016752	0	0	0	0	0	0	0	0	0	0	0	0	0	0	0	0	0	0	0	0	0
TCONS_00016753	0	0	0	0	0	0	0	0	0	0	0	0	0	0	0	0	0	0	0	0	0
TCONS_00016758	0	0	0	0	0	0	0	0	0	0	0	0	0	0	0	0	0	0	0	0	0
TCONS_00016760	0	0	0	0	0	0	0	0	0	0	0	0	0	0	0	0	0	0	0	0	0
TCONS_00016766	0	0	0	0	0	0	0	0	0	0	0	0	0	0	0	0	0	0	0	0	0
TCONS_00016767	0	0	0	0	0	0	0	0	0	0	0	0	0	0	0	0	0	0	0	0	0
TCONS_00016787	0	0	0	0	0	0	0	0	0	0	0	0	0	0	0	0	0	0.131497	0	1.34986	0
TCONS_00016802	0.0586656	0.047986	0	0	0	0	0	0.160553	0.13972	0.143178	0	0	1.22956	0.637604	1.38921	0.433359	0.908054	0.741315	0.885491	0.452905	0
TCONS_00016822	0	0	0	0	0	0	0	0	0	0	0	0	0	0	0.114308	0	0	0	0	0.536263	0
TCONS_00016870	0	0	0	0	0	0	0	0	0	0	0	0	0	0	0	0	0	0	0	0	0
TCONS_00016871	0	0	0	0	0	0	0	0	0	0	0	0	0	0	0.0980308	0	0	0	0	0	0
TCONS_00016872	0	0	0	0	0	0	0	0	0	0	0	0	0	0.184487	0	0.0899026	0	0	0	0.0680473	0.429762
TCONS_00016873	0	0	0	0	0	0	0	0	0	0	0	0	0.176553	0.104304	0.0925831	0	0	0	0.112844	0.193592	0
TCONS_00016877	0	0	0	0	0	0	0	0	0	0	0	0	0.0975167	0.141086	0.14989	0.0458167	0.533038	0	0.417302	0	0.702634
TCONS_00016891	0	0.103077	0	0	0	0	0	0	0	0	0	0.0500007	0.473034	0.597345	0.203719	0.147303	1.44192	0.26993	0.899745	1.72637	0.199626
TCONS_00016915	0	0.134495	0	0	0.0493386	0.045685	0.108702	0.0158165	0.060594	0	0	0.0786766	0	0	0	0.313721	0.187506	0.136125	0.264677	0	0.247175
TCONS_00016986	0	0.359578	0.369011	0.448709	0.699952	0.758194	0	0.288249	0.672707	0	0.149456	0.584203	0	0.207751	0	0	0.116412	0.746514	0.169816	0.550008	0
TCONS_00017035	0	0	0	0	0	0	0	0	0	0	0	0	0	0	0	0	0	0	0	0	0
TCONS_00017036	0	0	0	0	0	0	0	0	0	0	0	0	0	0	0	0	0	0	0	0	0
TCONS_00017055	0	0	0.0220628	0.0111391	0.0104229	0	0	0.0307629	0	0	0	0.042512	0.406683	0.401449	0.926368	0.0907706	1.11467	0.623891	0.119229	0.424255	1.1347
TCONS_00017056	0	0	0	0	0	0	0	0	0	0	0	0	3.53294	5.93835	0	0	0	11.8509	0	0	0
TCONS_00017104	0	0.62874	0	0.1945	0	0	0	0	0	0	0	0	0	0	0.124683	0	0	0	0	0	0
TCONS_00017128	0	0	0	0	0.117892	0	0.0835888	0	0.282543	0	0	0	0	0	0	0	0	0	0	0	0
TCONS_00017142	0	0	0	0	0	0	0	0	0	0	0	0	0	0	0	0	10.4923	0	0	0	0
TCONS_00017143	0	0	0	0	0	0	0	0	0	0	0	0	0	0	0	0	13.4769	0	0	0	0.389573
TCONS_00017147	0	0	0	0	0	0	0	0	0	0	0	0	0	0	0	0	0	0	0	0	0
TCONS_00017194	0.0278782	0	0	0.0638559	0	0.161634	0	0.264644	0.0287515	0	0.154046	0.209194	0.633917	0.203651	0	0.0782808	0.130364	0.0259248	0	0.102225	0.288915
TCONS_00017367	0	0.0159641	0.0160227	0	0	0	0	0	0	0	0	0	0.12468	0.258373	0.0948485	0	0.301181	0	0	0.139599	0.0721268
TCONS_00017381	0.0877704	0.0745941	0	0.0254546	0.0974859	0.232875	0	0.24987	0.0232494	0	0	0.0506612	0	0	0.101554	0	0	0	0	0	0
TCONS_00017506	0	0	0.0449772	0.0638534	0.0356092	0.0376694	0.0348048	0	0.00844802	0	0.0531442	0.0974761	0	0.161164	0.105085	0.215295	0.135736	0.252367	0.145166	0.230406	0.225547
TCONS_00017534	0	0.487805	0.0766573	0	0.316616	0.251904	0.173826	0.0753635	0.090914	0	0	0	0.0854411	0	0	0	0	0	0	0	0.0105742
TCONS_00017584	0	0	0.0247717	0	0	0	0.0174593	0	0	0	0	0	0	0	0.0799138	0	0.0986265	0	0.153404	0	0
TCONS_00017585	0	0	0.024901	0	0	0	0.0175265	0.0250467	0	0	0	0	0.434178	0.297829	0.0797879	0	0.258874	0.433426	0.394555	0.952702	0.582795
TCONS_00017600	0	0	0	0	0	0	0	0	0	0	0	0	0	0	0	0	0	0	0	0	0
TCONS_00017655	0	0	0	0	0	0	0	0	0	0	0	0	0	0	0.117245	0.102179	0	0	0	0.0765531	0.192931
TCONS_00017656	0	0	0	0	0	0.00691757	0	0	0	0	0	0.00821273	0	0	0	0.078804	0	0	0	0	0.261316
TCONS_00017657	0	0	0	0	0	0	0	0	0	0	0	0	0	0	0.0903706	0	0.180349	0	0	0	0
TCONS_00017661	0	0	0	0	0.041027	0	0	0	0.0154909	0	0.00810495	0	0	0	0	0	0	0	0	0	0
TCONS_00017699	0	0	0	0	0	0	0	0	0	0	0	0	0.0141022	0.129373	0	0.0387758	0.0134011	0.0132434	0	0.0132731	0.197047
TCONS_00017703	0.0965556	0.127095	0.0177613	0	0.194507	0.0374711	0.0512595	0	0.248641	0	0	0.104643	0	0	0	0.0182761	0	0	0	0	0
TCONS_00017704	0	0	0	0	0	0	0	0	0	0	0	0	0.588717	0	2.27039	0	0	0	0	1.23108	3.22585
TCONS_00017718	0	0	0	0	0	0	0	0	0	0	0	0	0.410579	0	0.639496	0.867639	0	0	0.597458	0	0
TCONS_00017733	0	0	0	0	0	0	0	0	0	0	0	0	0	0	0	0	0.0802185	0.0660957	0.115974	0	0
TCONS_00017740	0	0	0	0	0	0	0	0	0	0	0	0	0.0755573	0.545026	0	0	0	0	0	0.167781	0
TCONS_00017741	0	0	0	0	0	0	0	0	0	0	0	0	0	0	0	0	0	0	0	0	0.30939
TCONS_00017742	0	0	0	0	0	0	0	0	0	0	0	0	0.00943273	0	0	0.0419442	0.616732	0	0	0.132472	0
TCONS_00017772	0.17351	0.0860272	0.198598	0.110262	0.0553336	0.0942969	0.180643	0	0.0955474	0.112095	0.00911052	0.00926045	0.168215	0.0566395	0.0906321	0.115589	0.164498	0.135909	0.0607023	0.0507651	0.11835
TCONS_00017790	0	0	0	0	0	0	0	0	0	0	0	0	0	0.200613	0	0.333562	0	0	0	0	0
TCONS_00017791	0	0	0	0	0	0	0	0	0	0	0	0	0	0	0	0	0	0	0	0	0
TCONS_00017800	0	0	0	0	0	0	0	0	0	0	0	0	0	0	0	0.0497822	0	0.120631	0	0	0.355191
TCONS_00017801	0	0	0	0	0	0	0	0	0	0	0	0	0.138375	0.336518	0	0	0.192975	0.179146	0.257483	0	0
TCONS_00017895	0	0	0	0	0	0	0	0	0	0	0	0	0	0	0	0	0	0	0	0	0
TCONS_00017896	0	0	0	0	0	0	0	0	0	0	0	0	0	0	0	0	0	0	0	0	0
TCONS_00017924	0.0202708	0	0	0	0	0	0	0.0429774	0	0	0	0	0.0937321	0	0	0	0	0.231146	0.0949184	0.304276	0.0445487
TCONS_00017931	0	0	0	0	0	0	0	0	0	0	0	0	0	0	0	0	0	0	0	0	0
TCONS_00018025	0	0.112359	0.0178303	0.228333	0.0551305	0.0400769	0	0.336721	0	0	0.0665866	0.0169056	0.13444	0.26506	0.171226	0.167995	0	0.254524	0.177816	0	0.0795826
TCONS_00018027	0.0888188	0.115267	0.00817876	0	0.163962	0	0	0.193389	0.0319848	0	0.151751	0	0.0712701	0.0514551	0	0.0597937	0.0451855	0.249804	0.119011	0.00920824	0.242031
TCONS_00018039	0	0	0	0	0	0	0	0	0	0	0	0	1.46419	0	1.07295	1.9838	2.61652	1.7958	2.12356	1.81127	1.62565
TCONS_00018040	0	0	0	0	0	0	0	0	0	0	0	0	2.38303	3.97724	4.22602	2.9328	8.96809	1.85873	5.22153	7.49508	1.69999
TCONS_00018072	0	0	0	0	0	0	0	0	0.0206925	0	0	0	0	0	0	0	0.516908	0	0	0	0
TCONS_00018073	0	0	0	0	0	0.0435576	0	0	0.0162677	0	0	0	0	0	0	0.119187	0	0.214511	0	0	0.796106
TCONS_00018074	0	0	0	0	0	0	0	0	0	0	0	0	0.0651126	0	0	0	0	0	0.216296	0.323585	0
TCONS_00018075	0	0	0	0	0	0	0	0	0	0	0	0	0.0431731	0.458825	0	0	0.243438	0.18884	0	0.752205	0.187927
TCONS_00018076	0	0	0	0	0.0711286	0	0	0	0	0	0	0	0	0	0	0	1.21177	0.163804	0.168896	0	0
TCONS_00018083	0	0.00703935	0	0.0482499	0	0	0	0.0518483	0.0187917	0.0281334	0	0.0718611	0.25277	0.145927	0.0682844	0.468441	0.449487	0.448816	0.318571	0.582907	0.162488
TCONS_00018084	0	0.0360278	0	0	0	0	0	0	0	0	0	0	0.187447	0.133539	0	0	0	0	0	0.438003	0.162746
TCONS_00018085	0.0400654	0	0	0	0	0	0	0	0	0	0	0	0	0	0.191679	0.232695	0.147497	0	0.31291	0	0
TCONS_00018087	0.0411907	0	0.0438236	0.0975353	0	0	0	0.0914745	0	0	0	0	0	0	0.192802	0	0	0	0.328884	0	0
TCONS_00018150	0.103532	0.0184261	0.0451574	0	0.0852454	0.162453	0.0983497	0.0650084	0.0712694	0.0374336	0.120865	0.183847	0	0	0.217352	0.198314	0.254233	0	0.699091	0.317826	0.2776
TCONS_00018151	0	0	0	0	0	0	0	0	0	0	0	0	0	0	0	0	0	0	0	0	0
TCONS_00018182	0	0.09652	0	0.229909	0.159169	0.194193	0	0.30631	0.2474	0.128019	0.0971233	0.0731305	0.0583193	0.0343147	0.0789242	0.0363056	0.0269549	0.0514404	0	0.0628554	0.0249493
TCONS_00018205	0	0.0139025	0	0	0	0	0	0	0	0	0	0	0	0	0	0.0347537	0	0	0	0.0508414	0
TCONS_00018206	0	0	0	0	0	0	0	0	0	0	0	0	0	0	0	0	0	0	0	0.0400521	0.0477767
TCONS_00018207	0	0	0	0	0	0	0	0	0	0	0	0	0.463806	0.35366	0	0	0.268483	0.194442	0	0	0
TCONS_00018208	0	0	0	0	0.112401	0	0	0	0	0	0	0	0.292064	0	0	0.166422	0	0	0	0	0
TCONS_00018259	0	0	0	0	0	0	0	0	0	0	0	0	0	2.82814	1.3097	0	5.67932	2.96907	0	9.36981	9.32543
TCONS_00018260	0	0	0	0	0	0	0	0	0	0	0	0	0	0.72209	0	0	0.687753	0.403908	0.610964	2.01621	0
TCONS_00018263	0	0	0	0	0	0	0	0	0	0	0	0	0	0	0	0	0	0	0.386862	0	0
TCONS_00018264	0	0	0	0	0	0	0	0	0	0	0	0	0	0	0	0	0	0	0	0.355172	0
TCONS_00018335	0	0	0.0314492	0	0	0	0	0.091791	0.0716459	0	0	0.0743892	0	0.104343	0.0769077	0	0.150042	0	0	0.0411721	0
TCONS_00018353	0.0170124	0	0.0723875	0.0753342	0	0.056997	0.0295117	0.351758	0.0337497	0.0374212	0.0408596	0.0691705	0.113714	0.0717393	0	0	0	0	0	0	0.104981
TCONS_00018357	0.403702	1.42162	0	1.04983	0.555381	0	0.779441	0	0	0	0	1.27718	0	0	0	0	0	0	0	0	0
TCONS_00018358	0.695753	0	0	0	0	0	0	0	1.37046	0	1.12724	0	0	0	0	0	0	0	0	0	0
TCONS_00018359	0	0	0	0	0	0	0	0	0	0	0	0	0	0	0	0	0	0	0	0	0
TCONS_00018360	0	0	0	0	0	0	0	0	0	0	0	0	0	0	0	0	0	0	0	0	0
TCONS_00018361	0	0	0	0	0	0	0	0	0	0	0	0	0	0	0	0	0	0	0	0	0
TCONS_00018399	0	0	0	0.046459	0	0.0402003	0	0	0	0	0	0	0.444622	0.131986	0	0	0	0.0775247	0	0.110248	0.268055
TCONS_00018400	0	0	0	0.0474194	0	0.0414315	0	0	0	0	0	0	0	0.116613	0	0	0.253367	0.0743344	0.523609	0.106825	0
TCONS_00018408	0.104461	0	0.172	0.342605	0.215802	0.169482	0.187065	0.23926	0.263114	0	0.18628	0.256333	0.0756163	0.0557904	0.0392862	0.199484	0.0428193	0.0695885	0.0259756	0.0349275	0.0551912
TCONS_00018416	0	0	0	0	0	0	0	0	0	0	0	0	0	0	0	0	0.27995	0	0	0	0
TCONS_00018458	0	0.311611	0.0521227	0.0267532	0.054806	0.142054	0	0.104015	0.0258391	0	0	0.28655	0.0573174	0.027225	0.0294175	0	0	0	0	0	0
TCONS_00018513	0	0	0.0497699	0.0259007	0.0975269	0.131682	0.114618	0.219511	0	0	0.0240999	0.167571	0.0708848	0.261359	0	0.065787	0	0.198036	0	0	0
TCONS_00018595	0	0	0	0	0	0	0	0	0	0	0	0	0.0847609	0.157014	0.246576	0.107025	0.0719858	0	0.331107	0.740333	0.417398
TCONS_00018596	0	0	0	0	0	0	0	0	0	0	0	0	0.0970055	0	0	0	0.0847124	0.0740574	0.206228	0.30228	0
TCONS_00018601	0	0	0	0	0	0	0	0	0	0	0	0	0	0	0.379009	0.0268712	0.105752	0	0.137253	0	0.298378
TCONS_00018686	0	0	0	0	0	0	0	0	0	0	0	0	0	0	0	0	0	1.08571	0	0	0
TCONS_00018687	0	0	0	0	0	0	0	0	0	0	0	0	0	0	0	0	0.835405	0	0	2.91593	0
TCONS_00018688	0	0	0	0	0	0	0	0	0	0	0	0	0	0	0	0	2.51204	0.845702	0	0	0
TCONS_00018689	0	0	0	0	0.0836422	0	0	0	0	0	0	0	0	0	0	0	0	0.816361	0	0	0
TCONS_00018690	0	0	0	0	0	0	0	0	0	0	0	0	0	0	0	0	18.5836	1.36974	0	22.9506	0
TCONS_00018691	0	0	0	0	0	0.048059	0	0.133516	0	0	0	0	0.134717	0	1.00096	0.771151	0.173505	0.638016	1.07394	0	0.383483
TCONS_00018692	0	0	0.0870156	0	0	0	0	0	0	0	0	0	0	0.507759	0	0	0.862706	0	0	0	0
TCONS_00018710	0	0.0259976	0	0	0.0757569	0	0	0	0	0	0	0	0	0.583478	0.545279	0	0.688337	0.0283493	0	0	0
TCONS_00018775	0	0	0	0	0	0	0	0	0	0	0	0	0	0	0	0	0	0	0	0	0
TCONS_00018812	0.0651338	0	0.0151878	0.117887	0.0615636	0	0.0664523	0.0526467	0.0726463	0.0347273	0.356602	0	0.104626	0.139909	0.191491	0.0305566	0.0781187	0.136908	0.103862	0.015972	0.0318671
TCONS_00018813	0.0303247	0.0502678	0	0	0	0.0101451	0	0	0	0	0.106002	0	0	0	0	0	0	0	0	0	0
TCONS_00018939	0	0	0	0	0	0	0	0	0	0	0	0	0	0	0	0	0	0	0	0	0
TCONS_00018948	0	0	0	0.0932289	0	0	0	0	0	0	0	0.0321231	0.0331668	0	0	0	0	0	0.0149139	0	0
TCONS_00018950	0	0	0	0	0	0.0855146	0	0	0	0	0	0	0	0	0	0	0	0	0	0	0
TCONS_00018952	0.0290657	0.115664	0.0550187	0.118516	0.0370299	0.0103179	0.0248554	0.0259144	0.0727973	0.0253292	0	0.0728109	0.192257	0.239227	0.202319	0.616455	0.174478	0.34778	0.0639501	0.656584	0.0834079
TCONS_00018953	0.00197549	0.0145736	0.0413595	0.0914888	0	0.0185226	0.00424666	0	0.00383597	0.00755343	0.0217547	0.0345166	0	0.0363246	0.0417853	0.097106	0.0178105	0.25922	0	0	0.0724563
TCONS_00018954	0	0.0461163	0	0	0.0159478	0	0	0.0166975	0.0153353	0	0	0	0.154171	0.0694795	0.0567178	0	0.0392136	0.0830243	0.028024	0.469099	0.0578531
TCONS_00018965	0	0	0	0	0	0	0	0	0.18361	0	0.140199	0	0	0.21726	0	0.0513654	0.0500251	0	0	0.0959325	0
TCONS_00018999	0.0203628	0.0356915	0	0.0259943	0.0350493	0.0122348	0.0223506	0	0.0990518	0	0	0.0660072	0	0.250721	0.388219	0.111535	0.0798787	0	0.106524	0.0745316	0.117996
TCONS_00019001	0	0	0	0	0	0	0	0	0	0	0	0	0	0	0	0	0	0	0	0	0
TCONS_00019002	0	0.0612784	0	0	0	0	0	0	0.010137	0	0	0	0	0	0	0	0	0	0	0	0
TCONS_00019020	0	0	0	0	0.326906	0	0.282533	0.177866	0.398995	0.533919	0.171493	0	0.274713	0.183509	0	0	0	0	0.254948	0.252983	0
TCONS_00019022	0	0	0	0	0	0	0	0	0	0	0	0	0	0	0	0	0	0	0	0	0
TCONS_00019024	0	0	0	0	0	0	0	0	0	0	0	0	0	0	0	0	0	0	0	0	0
TCONS_00019066	0.0295166	0.104887	0.0337509	0.0355699	0.137079	0.174624	0.0643612	0.493804	0.0619965	0.148403	0.0670818	0	0	0	0	0	0.0714555	0.0352342	0.0364605	0	0
TCONS_00019073	0.0558554	0.0346569	0	0.155025	0.172254	0	0	0	0.166801	0	0	0	0	0.401947	0.688448	0	0	0	0	0	0
TCONS_00019076	0	0	0	0	0	0	0	0	0	0	0.145073	0.17065	0	0	0	0	0	0	0	0.476624	0
TCONS_00019082	0	0	0.0512315	0.0354343	0	0.0360087	0.0642853	0	0	0	0	0	0	0	0	0	0	0.0972107	0.226388	0	0.139848
TCONS_00019093	0	0	0	0	0	0	0	0	0	0	0	0	0	0	0	1.05547	0	0	1.30426	0	0
TCONS_00019137	0	0	0	0	0	0	0	0	0	0	0	0	0	0	0	0	0	0	0	0.244119	0.176558
TCONS_00019138	0	0	0	0	0	0	0	0	0.0535228	0.036624	0.0182431	0	0	0	0	0	0	0	0.178959	0	0
TCONS_00019139	0	0	0	0	0	0	0	0	0	0	0	0	0	0	0	0	0	0	0	0	0
TCONS_00019140	0	0	0.0143592	0	0	0	0	0	0	0	0	0	0	0	0	0	0	0	0	0	0
TCONS_00019186	0	0	0	0	0	0	0	0	0	0	0	0	0	0	0	0	0	0	0	0	0
TCONS_00019187	0	0	0	0	0	0	0	0	0	0	0	0	0	0	0	0	0	0	0	0	0
TCONS_00019188	0	0.30631	0.169738	0	0.104023	0.128504	0.077112	0	0	0	0	0	0	0	0	0	0	0	0	0	0
TCONS_00019242	0	0	0	0	0	0	0	0	0	0	0	0	0	0	0	0	0.185779	0.26281	0.0530155	0.287899	0.244384
TCONS_00019243	0	0	0	0	0	0	0	0	0	0	0	0	0	0.48134	0.146976	0.0137336	0	0.0827451	0	0.217073	0.173768
TCONS_00019244	0	0	0	0	0	0	0	0	0	0	0	0	0.477622	0.195596	0	0.0419995	0.389491	0.148453	0.194977	0	0.315483
TCONS_00019255	0	0	0	0	0	0	0	0	0	0	0	0	3.27942	6.08593	2.77613	2.24759	4.87706	2.62142	3.59601	15.9637	7.88526
TCONS_00019256	0	0	0	0	0	0	0	0	0	0	0	0	0	0	0	0	0	13.7368	0	0	0
TCONS_00019269	0	0	0	0.0337216	0	0	0.0999326	0.0330963	0	0	0.00982763	0	0.56672	0	0	0	0	0	0	0	0
TCONS_00019270	0	0	0	0	0	0	0	0	0	0	0	0	0	0	0.362742	1.53488	0	0.191808	1.17146	1.30773	0
TCONS_00019271	0.0265113	0.0587781	0	0	0.0346165	0.0645551	0	0	0.068544	0	0	0	0	0.388033	0	0	0.278069	0.218403	0	0	0.33619
TCONS_00019279	0	0	0	0	0	0	0	0	0	0	0	0	0	0	0.155358	0	1.43065	0.121963	0	3.3086	0.862461
TCONS_00019323	0	0	0	0	0	0	0	0	0	0	0	0	0	0	0.340764	0	0.501513	0.0179914	0.0697091	0.102517	0.151815
TCONS_00019326	0	0	0.0173584	0	0	0	0	0	0	0	0	0	0	0	0	0	0	0	0.328772	0.242728	0.245117
TCONS_00019327	0	0	0	0	0	0	0	0	0	0	0	0	0	0	0	0	0.286051	0.450935	0.907935	0	0
TCONS_00019358	0	0	0	0	0	0	0	0	0	0	0	0	0.269318	0.210662	0.220045	0.272265	0.854102	1.22064	0.0663285	1.35403	0.541372
TCONS_00019359	0	0	0	0	0	0	0	0	0	0	0	0	0.156248	0.240495	0.0840146	0	1.00161	0.991744	0.31491	1.37693	0.730128
TCONS_00019366	0	0	0	0	0	0	0	0	0	0	0	0	0.200816	0	0	0	0	0.041316	0	0.274363	0.328661
TCONS_00019392	0	0	0	0	0	0	0	0	0	0	0	0	0	0	0.985584	0	0	0	0	0.477357	0
TCONS_00019393	0.532726	0	0.542049	0	0.996846	0	1.36775	0	0	0	0	0	0	0	0	0	0	0	0	0.195492	0
TCONS_00019462	0	0	0	0	0	0	0	0	0	0	0	0	0	0	0.267216	0	0	0.30974	0	0	0
TCONS_00019478	0	0	0	0	0	0	0	0	0	0	0	0	0.11015	0	0	0	0	0	0	0	0
TCONS_00019481	0	0	0	0	0	0	0	0	0	0	0	0	0.449698	0.348144	0	0.347101	0	0	0.618582	0	0.986371
TCONS_00019483	0	0.307595	0	0	0	0	0	0	0	0	0	0	0	0	0	0	0	0	0	0	0
TCONS_00019515	0	0	0	0	0	0	0	0	0	0	0	0	0	0	0	0	0	0	0	0	0
TCONS_00019579	0	0	0	0	0	0.042526	0	0	0	0	0	0	0	0	0	0	0	0	0	0	0.117843
TCONS_00019580	0	0	0	0	0	0	0	0	0	0	0	0	0	0	0	0	0	0	0	0	0
TCONS_00019582	0	0	0	0	0	0	0.13171	0	0	0	0	0	0	0.0670175	0	0.11858	0	0	0	0	0
TCONS_00019584	0	0	0.0669334	0.0593966	0.0988209	0	0	0	0.0937279	0	0	0.143561	0	0	0.11673	0	0	0.13403	0	0	0
TCONS_00019608	0.170075	0.252969	0.484336	0	0.310488	0	0	0	0	0	0	0	0	0	0	0	0	0	0	0	0
TCONS_00019624	0.178286	0.530626	0.132197	0.480316	0.384616	0.619987	0.479787	0	0.121645	0	0.784823	0.261782	0	0	0	0.179561	0	0.353822	0.0588537	0	0.177231
TCONS_00019641	0	0	0	0	0	0	0.0826545	0.0449606	0	0	0	0	0.46964	0	0	0.247581	0	0.330117	0.160575	0	0.0417372
TCONS_00019741	0	0	0	0	0	0	0	0	0	0	0	0	0	0	0	0	0	0	0	0	0
TCONS_00019766	0	0	0	0.0255371	0	0	0	0	0	0	0	0	0.233752	0	1.37425	0	0.248185	0	0.0992638	0.480374	0.509661
TCONS_00019841	0	0	0	0	0	0	0	0	0	0	0	0	0	0	0	0	0	0	0	0	0
TCONS_00019890	0	0	0	0	0	0.0160902	0	0	0.0073482	0	0	0	0	0	0	0	0.0303083	0.118737	0	0	0
TCONS_00019894	0	0	0	0	0	0	0.0284076	0	0	0	0	0	0.0311957	0.242515	0.146089	0.188969	0	0.016305	0.509413	0.274202	0.115277
TCONS_00019904	0	0	0	0	0	0	0	0	0	0	0	0	0	0	0	0	0	0	0	0	0
TCONS_00019905	0	0	0	0	0	0	0	0	0	0	0	0	0	0	0	0	0.217741	0	0	0.395569	0
TCONS_00019907	0	0	0	0	0	0	0	0	0	0	0	0	0	0	0	0	0	0	0	0	0
TCONS_00019914	0	0	0	0	0	0	0	0	0	0	0	0	0	0	0	0	0	0	0	0	0
TCONS_00019915	0	0	0	0	0	0	0	0	0	0	0	0	0	0	0	0	0	0	0	0	0
TCONS_00019916	0	0	0	0	0	0	0	0	0	0	0	0	0	0	0	0	0	0	0	0	0
TCONS_00019927	0.0373387	0	0.0369378	0	0	0	0	0	0.0219234	0	0	0	0.0676717	0	0	0	0	0	0	0	0
TCONS_00019928	0	0.0825524	0	0	0	0	0	0	0	0	0	0	0	0	0	0	0	0	0	0	0
TCONS_00019929	0	0	0	0	0	0	0	0	0	0	0	0	0	0	0	0.133228	0	0	0	0	0
TCONS_00019930	0	0	0	0	0	0	0	0	0	0	0	0	0	0	0	0	0	0	0	0	0
TCONS_00019931	0	0	0	0	0	0	0	0	0	0	0	0	0	0	0	0	0.356335	0	0	0	0
TCONS_00019935	0	0	0	0	0	0	0	0	0	0	0	0	0	0	0	0	0	0	0	0	0
TCONS_00019936	0.0785758	0	0.122219	0	0.149885	0	0.121184	0	0	0	0	0	0	0	0	0	0.116156	0	0	0	0
TCONS_00019937	0	0	0	0.430193	0	0	0	0	0	0	0	0	0	0	0	0	0	0	0	0	0
TCONS_00019938	0	0	0	0	0	0	0	0	0	0	0	0	0	0	0	0	0	0	0	0	0
TCONS_00019976	0.079116	0.0372829	0.0688317	0	0.156056	0.115202	0.079209	0	0.13903	0.126138	0	0	0	0.101014	0.0300197	0.019628	0	0	0.070185	0	0
TCONS_00020048	0	0	0	0	0	0	0	0	0	0	0	0	0	0	0	0	0	0	0	0	0
TCONS_00020049	0	0.26395	0	0	0	0	0	0	0	0	0	0	0	0	0	0	0	0	0.430536	0	0
TCONS_00020050	0	0	0	0	0	0.0661389	0.0871623	0.291943	0.087332	0	0	0.128349	0	2.78884	3.56402	1.50135	5.04882	2.64419	2.66632	4.2243	4.32813
TCONS_00020085	0	0	0	0	0	0	0	0	0	0	0	0	0	0	0	0	0	0	0	0	0
TCONS_00020099	0	0	0.112831	0.0632243	0	0.0615357	0	0	0.0592162	0	0	0	0.261899	0.286831	0.297519	0	0.356414	0	0	0	0.756153
TCONS_00020100	0	0	0	0.0793939	0	0	0	0	0	0	0	0	0	0	0.304411	0	0	0.559352	0	0	0
TCONS_00020101	0	0	0	0	0	0	0	0	0	0	0	0	0	0	0	0	0	0	0	0	0
TCONS_00020107	0	0	0.103998	0	0	0	0	0	0	0	0	0	0.461275	0.330512	0.371778	0.0381164	0.191295	0.173844	0.370868	0.0385101	0.48507
TCONS_00020124	0	0	0	0	0	0	0	0	0	0	0	0	0	0	0	0	0	0	0	0	0
TCONS_00020125	0	0	0	0	0	0	0	0	0	0	0	0	0	0	0	0	0	0	0	0	0
TCONS_00020133	0.0473997	0.0526583	0.0971782	0.0397877	0.0495887	0	0.0230965	0	0	0	0	0	0.0521155	0	0	0.0469978	0.0481108	0.0476148	0.0820258	0.200482	0.242794
TCONS_00020134	0.0346441	0.0184868	0	0.0226541	0	0.055185	0.0175875	0.0301748	0.0537207	0.00868084	0.00684667	0.0497371	0.416477	0	0	0.34254	0	0.165909	0.472609	0.43081	0.861961
TCONS_00020136	0.0316624	0.0158095	0	0.0353949	0	0	0.0438182	0.034012	0	0	0.0155956	0	0	0.161765	0.193014	0.133351	0.175336	0.117743	0.264699	0.258763	0.207594
TCONS_00020138	0	0	0	0	0	0	0	0.154634	0	0	0	0	0	0	0	0	0	0	0	0	0
TCONS_00020143	0	0	0.212468	0	0	0.124443	0	0.303669	0	0.05057	0.253796	0.14435	0	0	0	0.516846	0	0.261449	0	0	0
TCONS_00020144	0	0.252225	0	0	0.112252	0.0566745	0.237228	0.229878	0	0	0	0.0608166	0	0	0	0	0	0	0	0	0
TCONS_00020152	0	0	0	0	0	0	0	0	0	0	0	0.0847251	3.06373	2.19804	1.755	1.1921	7.76418	1.60079	4.55668	6.69593	6.36567
TCONS_00020246	0.0537263	0.087746	0	0	0	0	0	0	0	0	0.0280166	0	0	0	0	0	0	0	0	0	0
TCONS_00020264	0.0667492	0	0	0	0	0	0	0	0	0	0	0	0	0	0	0.115103	0	0	0	0.839248	0
TCONS_00020265	0	0.0192221	0	0	0	0	0	0	0	0	0	0	0.0792842	0.471019	0.186065	0	0.205445	0	0.118138	0	0.101845
TCONS_00020266	0	0	0	0	0	0	0	0	0	0	0	0	0	0	0.189486	0.0558316	0	0	0	0.105985	0
TCONS_00020269	0	0	0	0	0	0	0	0	0	0	0	0	0	0	0	0	0.144554	0	0.212978	0	0.1022
TCONS_00020270	0	0	0	0	0	0	0	0	0	0	0	0	0.304333	0	0	0	0.149763	0.0835808	0	0	0
TCONS_00020294	0	0	0	0	0	0	0	0	0	0	0	0	0	0	0	0	0.428941	0.0248838	0	0	0.122567
TCONS_00020297	0	0	0	0	0	0	0	0	0	0	0	0	0.0253663	0	0	0	0	0.0234573	0	0.234072	0.166702
TCONS_00020299	0	0	0	0	0	0	0	0	0	0	0	0	0	0	0	0.0381397	0	0	0	0.243739	0
TCONS_00020301	0	0	0	0	0	0	0	0	0	0	0	0	0	0.075185	0	0.0727717	0.126805	0.0255663	0	0.233835	0.196213
TCONS_00020302	0	0	0	0	0	0	0	0	0	0	0	0	0	0	0.0751137	0	0	0	0	0.199177	0
TCONS_00020303	0	0	0	0	0	0	0.0240614	0	0	0	0	0	0	0	0.190387	0.0881088	0	0	0.0374902	0	0
TCONS_00020304	0	0	0	0	0	0	0	0	0	0	0.0251884	0	0	0	0	0	0	0	0	0.151492	0
TCONS_00020305	0	0	0	0	0	0	0	0	0	0	0	0	0.0327145	0.0462654	0	0.0738307	0.150889	0	0	0	0.154948
TCONS_00020306	0	0.0751587	0.0145153	0.0295151	0.0146875	0	0	0.0142446	0	0	0	0	0	0	0	0	0	0	0	0	0
TCONS_00020310	0	0	0	0	0	0.0378529	0	0	0	0	0	0	0	0	0	0	0	0	0	0	0
TCONS_00020312	0.0150472	0	0	0	0	0	0	0	0	0	0	0	0.197788	0	0.3825	0.0453037	0.15474	0.154288	0.163815	0	0.142736
TCONS_00020313	0	0.022942	0	0.00604851	0.0158974	0	0	0.0219437	0.0136215	0	0	0.0443991	0.0821693	0.123907	0.0593462	0.037517	0.074704	0	0	0.15815	0.0200251
TCONS_00020364	0	0	0	0	0	0	0	0	0	0	0	0	0	0	0	0	0	0	0	0	0
TCONS_00020369	2.34276	3.22511	3.20543	4.66034	2.34539	2.80594	3.77602	3.29635	2.90951	2.33667	2.42701	3.12214	0	0	0	0	0	0	0	0	0
TCONS_00020380	0	0	0	0	0	0	0	0	0	0	0	0	0	0	0	0	0	0	0	0	0
TCONS_00020441	2.517	1.32967	1.61518	0	0	1.85064	0	0	0	1.89363	0	0	0	0	0	0	0	0	0	0	0
TCONS_00020450	0	0	0	0	0	0	0	0	0	0	0	0	0	0	0	0	0	0	0	0	0
TCONS_00020523	0	0	0	0	0	0	0	0	0	0	0	0	0.368526	0.302289	0.370292	0	0	0	0.377947	0	0
TCONS_00020544	0	0	0	0	0	0	0	0	0	0	0	0.0140964	0.230448	0.113751	0	0	0.185953	0.119115	0.243178	0.0307948	0.124054
TCONS_00020613	0	0	0	0	0	0	0	0	0	0	0	0	0	0	0	0	0	0	0	0	0
TCONS_00020615	0	0	0	0	0	0.20713	0	0	0	0.0661565	0.0696028	0	0	0	0	0	0	0	0	0	0
TCONS_00020616	0	0	0	0.135262	0	0	0	0	0	0	0	0	0	0	0	0.122578	0	0.162071	0.310585	0	0.328643
TCONS_00020617	0	0	0	0	0	0	0	0	0	0	0	0	0	0	0	0	0.86743	0	0	1.02187	0.614172
TCONS_00020618	0	0	0	0	0	0	0	0	0	0	0	0	0.459269	0.503141	0.469539	0	0	0.255887	0.462235	1.6091	0.396859
TCONS_00020621	0	0	0	0	0.0903043	0	0	0	0	0	0	0	0	0	0	0	0	0	0	0	0
TCONS_00020707	0	0	0	0	0	0	0	0	0	0	0	0	0	0	0	0	0.264466	0	0	0.304927	0
TCONS_00020708	0	0	0	0	0	0	0	0	0	0	0	0	0.705795	0	0.2714	0.2324	0.330855	0.483311	0.886494	0.243847	2.0649
TCONS_00020709	0	0	0	0	0	0.110397	0	0	0	0	0	0	0.884331	0	0.806811	0.465112	0.338092	0.623274	0.88019	0.596915	1.10492
TCONS_00020710	0	0	0	0	0	0	0	0	0	0	0	0	0	0	0	0	0.58759	0	0	0	0
TCONS_00020743	0.0396619	0.161243	0.0107154	0.234892	0.0264054	0.06174	0.020197	0.0317225	0.039758	0.0260552	0.0420582	0	0.00529845	0	0.0225798	0.0683477	0	0.0443328	0.033976	0.00976563	0.0250323
TCONS_00020758	5.24801	0	3.49717	4.4647	4.34141	3.94046	3.96494	2.86375	3.52182	3.57952	0	4.25661	2.40742	1.93203	2.19206	0	0	0	0	0	0
TCONS_00020759	0	0	0	0	0	0	0	0	0	0	0	0	0	0	0	0	0	0	0	0	0
TCONS_00020760	0	0	0	0	0	0	0	0	0	0	0	0	0	0	0	0	0	0	0	0	0
TCONS_00020918	0	0	0	0	0	0	0	0	0	0	0	0	0.17626	0.272324	0	0.125344	0.821734	0.0563152	0.840392	0.421275	1.72697
TCONS_00020919	0	0	0	0	0	0	0	0	0	0	0	0	0.480704	0	1.21333	0.0653402	0.803845	0.0416099	0.721166	0.990793	1.48305
TCONS_00020920	0	0	0	0	0	0	0	0	0	0	0	0	0.111075	0	0	0	0.272508	0	0.434899	0.258269	0
TCONS_00020937	0	0	0	0	0	0	0	0	0	0	0	0	0	0	0	0	0	0	0	0	0
TCONS_00020942	0.365278	0	0.201663	0	0.0703592	0.0750723	0	0.0761862	0.133988	0	0	0	0	0	0	0	0	0	0	0	0
TCONS_00020959	0	0	0	0.00775969	0.00757681	0	0	0	0	0.168715	0	0	0	0.539272	0	0	0	0.199171	0.31359	0	0
TCONS_00020969	0	0	0	0	0	0	0	0	0	0	0	0	0	0	0	0	0	0	0	0	0
TCONS_00020970	0	0	0	0	0	0	0	0	0	0	0	0	0	0	0	0	0	0	0	0	0
TCONS_00020971	0	0	0	0	0	0	0	0	0	0	0	0	0	0	0	0	0	0	0	0	0
TCONS_00020973	0	0	0	0	0	0	0	0	0	0	0	0	0	0	0	0	0	0	0	0	0
TCONS_00020975	0	0	0	0	0	0	0	0	0	0	0	0	0	0	0	0	0	0	0	0	0
TCONS_00020980	0	0	0	0	0	0	0	0	0.169506	0	0	0	0.155918	0	0.168839	0.375869	0.117388	0	0.189848	0	0.214613
TCONS_00021049	0	0	0	0	0	0	0	0	0	0	0	0	0	0	0	0	0	0	0	0	5.6478
TCONS_00021134	0.0608321	0	0.044614	0.102102	0	0.0232915	0.0209289	0	0.0104971	0.0805628	0.144483	0.055948	0.111397	0	0.247154	0	0.0617123	0.334129	0	0.0690701	0
TCONS_00021145	0	0	0	0	0	0	0	0	0	0	0	0	0	0	0	0	0	5.90881	0	0	0
TCONS_00021152	0	0	0	0	0	0	0	0	0	0	0	0	0	0	0	0	0	0	0	0	0
TCONS_00021186	0	0	0	0	0	0	0	0	0	0	0	0	0.264771	0.627223	0	0.200853	0	0.175237	0	0.151481	0
TCONS_00021187	0	0	0	0	0	0	0	0	0	0	0	0.072076	0.166705	0	0	0	0.166082	0.288962	0	0.18136	0.369046
TCONS_00021398	0	0	0	0	0	0	0	0	0	0	0	0	0	5.92249	0	0	0	0	0	0	0.797884
TCONS_00021439	0.00993132	0	0	0.00374361	0.0035763	0	0	0	0	0	0	0	0.0930114	0.19062	0.0260251	0.0409053	0.149875	0.0598857	0	0.0655822	0.353788
TCONS_00021513	0	0	0	0.25153	0	0	0	0	0	0	0	0	0	0	0.12055	0	0.392415	0.149262	0.0483551	0.622455	0.249708
TCONS_00021563	0.187852	0.379007	0.225075	0	0	0	0	0	0	0	0	0	0	0	0	0	0	0	0	0	0
TCONS_00021593	0	0	0.015314	0	0.0146755	0	0	0	0	0	0	0	0.231201	0.0467121	0	0.0701946	0	0.0456913	0.0898889	0.0324098	0.226316
TCONS_00021643	0	0	0	0	0	0	0	0	0	0	0	0	0	0.372229	0.0870538	0	0	0.0228258	0	0	0
TCONS_00021656	0	0	0	0.0603793	0	0.121543	0	0	0	0	0.166728	0	0.198816	0	0	0	0.151741	0	0.390626	0	0.887031
TCONS_00021670	0	0	0	0	0	0	0	0	0	0	0	0	0.413394	0	0	0	0	0	0.468517	0	0.45915
TCONS_00021673	0.167339	0	0	0	0	0	0	0	0.0430374	0	0.0326961	0	0	0	0	0	0	0	0	0	0.133292
TCONS_00021675	0.0640017	0.112874	0.107542	0	0.199619	0	0	0.0478444	0.0789022	0.868554	0	0.32428	0	0	0	0	0.320642	0	0	0.375885	0
TCONS_00021681	0	0	0	0	0	0	0	0	0	0	0	0	0	0	0	0	0	0	0	0	0
TCONS_00021690	0	0	0	0	0	0	0	0	0	0	0	0	0	0	0	0	0	0	0	0	0
TCONS_00021767	0	0	0	0	0	0	0	0	0	0	0	0	0	0	0	0.0519543	0	0	0	0.495118	0.153501
TCONS_00021781	0	0.14968	0	0.15228	0	0	0	0	0	0	0	0	0	0	0	0	0	0	0	0	0
TCONS_00021782	0	0	0.0502973	0	0.107595	0	0	0	0.136337	0	0	0	0	0	0.0725015	0	0	0.060732	0.0231659	0.0449705	0
TCONS_00021783	0.150228	0.0220194	0.102316	0.18694	0.190763	0.215911	0.10514	0.17947	0.0418336	0.114729	0.177176	0.252901	0.0907422	0.0722132	0.0950005	0.149519	0.0243373	0.0533814	0.0252463	0.0300659	0.102983
TCONS_00021784	0.0489985	0	0	0	0	0	0	0	0	0.317246	0	0.244234	0.0431861	0.154255	0	0	0	0	0	0	0
TCONS_00021896	0	0	0	0	0	0	0	0	0	0	0	0	0	0	0	0	0	0	0	0	0
TCONS_00021904	0	0	0	0	0	0	0	0	0	0	0	0	0	0	0	0	0	0	0	0	0
TCONS_00021905	0	0	0	0	0	0	0	0	0	0	0	0	0	0	0	0	0	0	0	0	0
TCONS_00022010	0	0	0	0	0	0	0	0	0	0	0	0	0.62546	0	2.0221	0.130942	0.877014	0.289588	0.137244	0	0.988806
TCONS_00022011	0	0	0	0	0	0	0	0	0	0	0	0	0.0515499	0.142612	0	0	0.471792	0.12112	0.139267	0.331437	0
TCONS_00022012	0	0	0	0	0	0	0	0	0	0	0	0	0	0.261871	0	0.0604573	0.351481	0.0639962	0	0.257142	0.0643633
TCONS_00022014	0	0	0	0	0	0	0	0	0	0	0	0	0	0.317875	0	0	0	0	0	0	0
TCONS_00022015	0	0	0	0	0	0	0	0	0	0	0	0	0	0	0.318802	0	0	0.483748	0.423249	0	0
TCONS_00022018	0.0256281	0.0485361	0.0166244	0	0	0.00584469	0	0	0.0341164	0	0	0.0463238	0	0.0495273	0	0	0	0	0	0.258703	0
TCONS_00022036	0	0	0	0	0	0	0	0	0	0	0	0	0	0	0	0	0	0	0	0	0
TCONS_00022037	0	0	0	0	0	0	0	0	0	0	0	0	0.130166	0	0	0	0.286104	0.0948342	0	0	0.169005
TCONS_00022038	0	0	0	0	0	0	0	0	0	0	0	0	0	0	0	0	2.76294	0	0	0.824953	0
TCONS_00022042	0	0	0	0	0	0	0	0	0	0	0	0	0.157942	0	0	0	0	0.240447	0.625786	0.0305048	0
TCONS_00022043	0	0	0	0	0	0	0	0	0	0	0	0	0.610282	0.819047	0.34017	0	0.871347	0	0.42079	0	0
TCONS_00022165	0	0	0	0	0	0	0	0	0	0	0	0	0.0984639	0.351678	0.263127	0.4289	0.945775	0.426911	0.61748	1.12023	1.43192
TCONS_00022173	0	0	0	0	0	0	0	0	0	0	0	0	0	0	0	0	1.27433	0	0	0.223774	0
TCONS_00022174	0	0	0	0	0	0	0	0	0	0	0	0	0	0	0	0	0	0	0	0	0.754354
TCONS_00022186	0	0	0.0366928	0	0	0	0	0	0	0	0	0	0.61165	0.373635	1.23957	0.607881	3.8284	1.19468	1.1449	5.44008	2.0162
TCONS_00022187	0	0	0	0	0	0	0	0	0	0	0	0	0	0	0.562065	0	1.73908	0	0.519458	1.42539	1.09665
TCONS_00022188	0	0	0	0	0	0	0	0	0	0	0	0	0.925291	0	0.1017	0.343577	0.610111	0	0	0	1.42984
TCONS_00022189	0	0	0	0	0	0	0	0	0	0	0	0	0	0.24777	0	0	0.942872	0.407263	0.28318	1.92701	0.454469
TCONS_00022301	0	0.125312	0.144371	0.111773	0	0	0.101421	0	0	0	0	0	0	0	0	0.0605085	0.0228474	0	0	0	0
TCONS_00022302	0	0.146478	0	0	0	0	0.219786	0.233816	0.246853	0.0911834	0	0.231233	0	0	0	0	0	0	0.0309313	0	0
TCONS_00022303	0.182005	0	0	0.175833	0.159741	0.185439	0	0	0	0.130121	0	0.172848	0	0	0	0	0	0	0	0	0.0669817
TCONS_00022304	0	0	0	0	0	0	0	0	0	0	0	0.144856	0	0	0	0	0	0.0776544	0	0	0.0431051
TCONS_00022305	0.122654	0.133017	0.200811	0.138824	0.262258	0.102131	0.167939	0.374406	0	0.232202	0	0	0	0	0	0	0	0.0598784	0	0.0511173	0
TCONS_00022306	0	0	0	0	0	0.116818	0	0	0.291345	0	0	0.370505	0	0	0.159877	0	0.0165519	0.0569483	0	0	0
TCONS_00022309	0	0	0	0	0.27015	0	0	0.188492	0	0.230913	0	0.139724	0	0	0.216548	0	0	0	0	0.0198294	0
TCONS_00022310	0.191562	0.0888153	0.116287	0.254829	0	0.306182	0.10803	0.219892	0.284111	0	0	0	0	0	0	0	0.0244238	0	0.0930899	0	0.0488208
TCONS_00022346	0	0.0744137	0	0	0	0	0	0	0	0	0	0	0.852349	0.298456	1.05784	0.192368	1.48542	1.02584	1.96396	3.4122	4.15754
TCONS_00022347	0	0	0	0	0	0	0	0	0	0	0	0	0.92636	1.82298	1.00704	0.316049	2.39123	1.6631	3.68932	2.56287	8.89504
TCONS_00022350	0	0	0	0	0	0	0	0	0	0	0	0	0.0951724	0.261847	0	0.403647	1.75062	0.0328838	0.61317	0.232358	0.134736
TCONS_00022380	0	0	0	0	0	0	0	0	0	0	0	0	0.613926	0	0.061792	0	0.0550964	0	0.10956	0	0.379048
TCONS_00022424	0	0	0	0	0.152777	0	0.117298	0.0736823	0.132913	0.321344	0.108312	0.0592169	0	0	0	0	0	0	0	0	0
TCONS_00022431	0	0	0	0	0	0	0	0	0	0	0	0	2.1534	0	0	0	2.61498	3.44509	0	0	2.29804
TCONS_00022432	0	0	0	0	0	0	0	0	0	0	0	0	0	0	0	0	0	0	0	0	0
TCONS_00022469	0	0	0.0338602	0	0	0	0	0	0.0657918	0.273496	0.0577129	0	0.274382	0.345543	0.254891	0	0.755659	0.166516	0.259858	0	0.205573
TCONS_00022470	0	0	0	0	0	0	0	0	0	0	0	0	0	0	1.54968	0	0	0.380776	0	0	0.521713
TCONS_00022484	0	0	0	0.0937612	0.0600451	0.0917274	0.0543043	0	0	0	0	0	0	0	0	0	0	0	0	0	0
TCONS_00022485	0	0	0.0544228	0	0	0	0	0	0	0	0	0	0	0	0	0	0	0	0	0	0
TCONS_00022556	0.141765	0	0	0	0.127326	0.13441	0	0	0.00800057	0	0	0	0.0790068	0	0	0.206067	0.0846534	0.186381	0	0	0.096603
TCONS_00022557	0	0.0185519	0	0	0	0	0	0.0447384	0	0.0444264	0.152061	0	0.347074	0.12568	0.038096	0.0766483	0	0	0.100046	0.0816239	0.0762087
TCONS_00022568	0	0	0	0.0918479	0	0	0	0	0	0	0	0	0	0.0733542	0	0	0.16437	0	0	0	0
TCONS_00022623	0	0	0	0	0	0	0	0	0.299286	0	0.0641424	0	0	0.305041	0	0.127609	0.162606	0	0.0858675	0	0
TCONS_00022624	0.355485	0.795042	0.358577	0.47178	0.171973	0.32813	0.466955	0.133	0.0793226	0	0	0	0.93506	0.924197	0.334441	0.706248	0.110106	0.56457	0.646696	0.96117	1.23363
TCONS_00022625	0	0	0	0.13002	0	0	0	0	0	0	0	0.223085	0	0.319082	0.213515	0	0	0.0613019	0	0	0
TCONS_00022737	0	0	0	0	0	0	0	0	0	0	0	0	0	0	0	0	0	0	0	0	0
TCONS_00022842	0	0.16565	0	0.175816	0.105122	0.085423	0.302977	0	0	0	0.0758524	0.0193709	0	0.0547401	0	0.0438144	0	0.0563282	0	0.0294079	0.103467
TCONS_00022843	0	0	0	0	0	0	0	0.265194	0	0	0	0	0	0	0	0	0.127022	0	0	0	0.308788
TCONS_00022844	0	0	0	0	0	0	0	0	0	0	0	0.0157405	0	0	0.163949	0.047251	0	0	0.0514755	0.0398929	0.0892155
TCONS_00022876	0	0	0	0	0	0	0	0	0	0	0	0	0	0	0	0	0	0	0	0	0
TCONS_00022877	0	0	0	0	0	0	0	0	0	0	0	0	0.628598	0	0	0	0.575327	0	0	0.596091	2.12763
TCONS_00023167	0	0	0	0	0	0	0	0	0	0	0	0	0	0	0	0	0	0	0	0	0
TCONS_00023234	0	0	0.159493	0	0	0	0	0	0.227622	0	0	0	0	0	0	0	0	0.0560551	0	0.168281	0
TCONS_00023280	0.0104617	0.0177291	0.0114582	0.0414621	0.00577075	0.0241949	0.0601335	0.0498504	0.0325175	0.0522621	0.0276706	0.0281716	0.117804	0.325815	0.195239	0.372839	0.0763207	0.184015	0.243275	0.122431	0.248594
TCONS_00023364	0	0.00699071	0	0	0	0.0220854	0.0129354	0	0.013064	0	0	0	0	0	0	0.0271817	0.0298009	0	0	0	0
TCONS_00023451	0	0	0	0	0	0	0	0	0	0	0	0	0.271646	0	0.055714	0.150132	0.718278	0.240869	1.08004	0.229022	1.1532
TCONS_00023467	0	0	0.0465591	0	0.0282864	0	0	0.120075	0.030102	0	0	0	0.0154419	0	0.00651437	0	0.00271172	0	0.00548847	0.00273362	0.0258777
TCONS_00023487	0.0965593	0	0	0	0	0.0748423	0	0.0338725	0	0	0	0.0337097	0.0689495	0.202997	0	0.0312841	0.18515	0	0.314539	0.247002	0
TCONS_00023501	0	0.048776	0.0485413	0	0	0.0515738	0.177058	0	0	0.110598	0	0.143448	0	0	0	0	0	0	0	0	0
TCONS_00023506	0.0274625	0.0835686	0	0.0500103	0	0.0630105	0	0.0291867	0	0.104723	0	0	0	0	0	0	0	0	0.127705	0	0
TCONS_00023509	0	0	0	0.0978021	0	0	0	0	0	0	0	0	0	0	0	0.27533	0	0	0	0	0
TCONS_00023549	0.0662982	0	0	0	0	0.0573058	0.102677	0.229106	0.306279	0.0765199	0	0	0	0	0.0563795	0	0	0	0	0	0.0457045
TCONS_00023551	0	0.252262	0.0507933	0	0.0742047	0	0	0	0	0.0188629	0	0	0.0724723	0	0	0.131281	0.106855	0.0435724	0.129461	0.319066	0.0463374
TCONS_00023558	0	0	0	0	0	0	0	0	0	0	0	0	0	0	0	0	0	0	0	0	0
TCONS_00023559	0	0	0	0.69129	0	0	0	0	0	0	0	0	0	0	0	0	0	0	0	0	0
TCONS_00023562	0.636063	0	0	0	0	0	0	0	0	1.35871	0.778128	0	0	0	0	0	0	0	0	0	0
TCONS_00023563	0	0	0	0	0	0.154749	0	0	0	0	0	0.413203	0	0	0	0	0	0	0	0	0
TCONS_00023564	0	0	0	0.29644	0	0	0	0	0	0	0.112663	0.134152	0	0	0	0	0	0	0	0.144808	0.20171
TCONS_00023565	0	0	0	0	0	0	0	0	0	0	0	0	0	0.333608	0	0	0	0	0	0	0
TCONS_00023598	0	0	0	0	0	0.0192633	0	0.0791316	0.0351606	0	0.0595373	0	0	0	0	0	0	0.282363	0	0	0
TCONS_00023625	0	0	0.0589099	0	0	0	0	0	0.0818164	0.207215	0	0	0	0	0	0	0	0.164508	0.0924298	0	0.135894
TCONS_00023644	0	0.123823	0	0	0	0.0854891	0	0.115144	0	0	0	0	0.113566	0.393796	0.246267	0.0954252	0	0	0	0.0615227	0.0315982
TCONS_00023652	0	0	0.0797309	0	0.101243	0.110803	0.329826	0	0	0	0	0	0	0	0	0	0	0	0	0.135229	0
TCONS_00023654	0.127851	0	0	0	0	0	0	0	0.0718801	0.40745	0	0	0	0	0	0	0	0	0.166994	0	0
TCONS_00023655	0	0	0	0	0	0	0	0	0	0	0	0	0	0	0	0	0	0	0	0	0
TCONS_00023656	0	0	0	0	0	0	0	0	0	0	0	0	0.246189	0	0	0	0	0	0	0.164669	0
TCONS_00023670	0	0	0	0	0	0	0	0	0	0	0	0	0.241875	0.0544717	0	0	0.189476	0.473827	0.527024	0.438086	0.5289
TCONS_00023671	0	0	0	0	0	0	0	0	0	0	0	0	0.188489	0.143357	0	0.143671	0	0	0	0	0.0965715
TCONS_00023672	0	0	0	0	0	0	0	0	0	0	0	0	0	0	0.207609	0	0	0	0	0.582534	0
TCONS_00023673	0.106479	0	0.192305	0.0407116	0.0749982	0.0401913	0	0	0	0	0.252168	0.226474	0.180353	0.254074	0.0879907	0.563178	0	0	0.147012	0.284983	0
TCONS_00023682	0	0	0	0	0	0	0	0.0704857	0	0	0	0	0	0.131193	0	0.266536	0.0818165	0	0	0.169282	0.159428
TCONS_00023802	0	0	0	0	0	0	0	0	0	0	0	0	0	0	0	0	0	0	0.554663	1.92497	0
TCONS_00023826	0	0	0	0	0	0	0	0	0	0	0	0	0	0	0	0	0	0	0	0	0
TCONS_00023828	0	0	0	0	0	0	0	0	0	0	0	0	0	0	0	0	0	0	0	0	0
TCONS_00023931	0.0161616	0	0	0	0	0	0	0	0	0	0	0	0	0	0	0	0	0	0.105875	0	0
TCONS_00024110	0.282713	0	0.12992	0.10956	0.182992	0.222302	0.149268	0.078562	0.592673	0.0679016	0.230514	0.103268	0.520488	0.185388	0.194991	0.201643	0.51484	0.304218	0.664535	0.805124	0.337033
TCONS_00024142	0.420998	0.247802	0.748044	0	0	0.251674	0.648434	0	0	1.51482	0	0.257735	0	0	0	0	0	0	0	0	0
TCONS_00024160	0	0	0	0	0	0	0	0	0	0	0	0	0	0	0	0.363492	0	0	0	3.11369	0
TCONS_00024167	0	0	0	0.0396058	0	0	0	0	0	0	0	0.0318747	1.50556	1.15485	1.23888	0.376951	0.655298	0	1.3952	1.66865	1.58931
TCONS_00024190	0	0.0614048	0	0	0	0	0	0	0	0	0	0	0	0.288574	0	0	0	0	1.44456	0.121777	0
TCONS_00024191	0	0	0.137471	0	0	0	0	0	0	0	0	0	0	0	0	0	0.135386	0.281154	0	1.21329	0
TCONS_00024203	0	0	0.0974482	0.0499738	0	0.016657	0	0	0	0	0	0	0.0155059	0.127206	0	0	0.0557923	0.0274289	0.290206	0.0135719	0.0280124
TCONS_00024209	2.43779	0	0	0.218956	0	0	0	2.30693	0.555874	0	0	0	0	0	0	0	0	0	0	0.353961	0
TCONS_00024215	0	0	0	0	0	0	0	0	0	0	0	0	0	0	0	0	0.478162	0	0.0248896	0	0.151172
TCONS_00024231	0	0.862898	0	0	0	0	1.66591	0	0	0	0	0	0	0	0	0	0	0	0.143256	0	0
TCONS_00024309	0	0	0	0	0	0	0	0	0	0	0	0	0	0	0	0	0	0	0	0	0
TCONS_00024311	0	0.0500052	0.0964819	0.146412	0	0.0610364	0	0.135615	0.109518	0.208015	0.103575	0.258711	0.4591	0.291982	0.213397	0.401269	0.180594	0.307533	0.56324	0.284028	0.235782
TCONS_00024318	0	0	0	0	0	0	0	0	0	0	0	0	0	0	0	0	0	0	0	0	0
TCONS_00024319	0	0	0	0	0	0	0	0	0	0	0	0	0	0	0	0	0	0	0	0	0
TCONS_00024320	0	0	0	0	0	0	0	0	0	0	0	0	0	0	0	0	0	0	0	0	0
TCONS_00024385	0	0.035915	0	0	0	0	0.0487484	0.0855043	0	0	0	0	0	0	0	0	0	0	0	0	1.09634
TCONS_00024386	0.0217579	0.0328037	0	0	0	0.0167194	0	0	0.0267217	0.0283988	0	0.0119127	0.294106	0.376105	0	0.308133	0	0.42303	0.360939	0.295427	0.868002
TCONS_00024387	0	0	0	0	0.0248467	0	0	0	0	0	0	0	0	0	0.447425	0	0.566537	0	0.207332	0.162427	0
TCONS_00024388	0	0	0	0	0.0317636	0	0	0	0	0	0.0390865	0	0	0	0	0.336813	0	0	0	0	0
TCONS_00024401	0	0	0	0.0250729	0	0	0	0	0	0	0	0	0	0.399036	0	0.0727657	0	0	0.0209588	0.152202	0
TCONS_00024404	0	0	0	0	0	0	0	0	0	0	0	0	0	0	0	0	0.00582894	0	0	0	0.122171
TCONS_00024405	0	0	0	0	0	0	0	0	0	0	0	0	0.0290292	0.0459214	0.0123589	0	0	0.0438789	0	0.0178586	0.103232
TCONS_00024455	0	0	0	0	0	0	0	0	0	0	0	0	0.102014	0	0.753222	0	0	0	0.0973421	0.179067	0.273725
TCONS_00024691	0	0	0	0	0	0	0	0	0	0	0	0	12.8614	13.7284	10.9478	12.442	16.1166	15.044	17.0215	20.9773	16.9268
TCONS_00024694	0.0136885	0.0630993	0	0.0467335	0.0463083	0.0160862	0.0892865	0.0144732	0	0.0873657	0.0156146	0.0300117	0.200378	0	0.0645101	0.0282032	0	0.028645	0.0728533	0.0577998	0.229451
TCONS_00024716	0	0	0	0	0	0	0	0	0	0	0	0	0	0	0	0	0	0.0311352	0	0	0
TCONS_00024733	0	0	0	0	0	0	0	0	0	0	0	0	0	0	0	0	0	0	0	0	0
TCONS_00024734	0.0111753	0	0	0	0.0270266	0	0	0	0	0	0	0	0	0	0.0417904	0	0	0	0	0	0.0437552
TCONS_00024735	0	0	0	0	0	0	0	0.0893284	0.0303112	0.118382	0	0	0	0	0	0	0.100647	0	0.0948925	0	0
TCONS_00024736	0	0	0	0	0	0	0	0	0	0	0	0	0	0	0	0	0	0	0	0	0
TCONS_00024737	0	0	0	0	0	0	0	0	0	0	0	0	0	0	0	0	0	0	0	0	0
TCONS_00024751	0	0.0427207	0	0	0	0	0	0	0	0.28344	0	0	0	0	0	0	0	0	0	0.0198504	0
TCONS_00024755	0	0.0533117	0	0.0179871	0	0	0.0167744	0	0	0	0.143332	0.478362	0	0	0	0.0334459	0.110403	0	0	0	0
TCONS_00024759	0	0	0	0	0	0	0	0	0	0	0	0	0	0.250606	0	0	0.415078	0	0.0351557	0	0
TCONS_00024774	0.0618914	0	0.0108895	0	0.0440253	0.120459	0.012057	0.0560914	0.0954256	0.0215101	0	0.06187	0.0201829	0	0.0208161	0	0	0.0158179	0	0	0.00652288
TCONS_00024779	0	0	0	0	0	0	0	0	0	0	0	0	0	0	0.764564	0.0688304	0.396512	0.0678254	0.202606	0.534096	0.212315
TCONS_00024788	0	0	0	0	0	0	0	0	0	0	0	0	0	0	0	0	0.361442	0	0	0	0
TCONS_00024789	0	0	0	0	0	0	0	0	0	0	0	0	0	0	0	0	0.206828	0.138531	0	0	0
TCONS_00024790	0	0	0	0	0	0	0	0	0	0	0	0	0	0	0	0	0.208185	0.0951811	0	0	0
TCONS_00024791	0	0	0	0	0	0	0	0	0	0	0	0	0	0	0	0	0.525494	0.319691	0.0235624	0	0
TCONS_00024793	0.0555536	0.254772	0.212789	0.139345	0.549824	0.374603	0.369008	0.128446	0.107441	0	0.373372	0.0768356	0.522611	0.701975	0.146091	0.192727	0.852036	0.552529	0.855897	0.973232	1.15463
TCONS_00024879	0	0.045291	0.224793	0	0.0438861	0.0459776	0	0	0	0	0	0.0893824	0	0	0.365935	0.652518	1.67227	1.4162	1.03953	2.02276	0
TCONS_00024885	0.362098	0.246923	0.162055	0.76889	0.720578	0.510158	0.22326	0.232642	0.52499	0	0.24005	0	0.150682	0	0	0	0	0.074671	0	0	0.0762405
TCONS_00024916	0	0	0	0	0	0	0	0	0	0	0	0	0	0	0	0	0	0	0	0	0
TCONS_00025097	0	0	0	0	0	0	0	0	0	0	0	0	0.244154	0.322064	0.168636	0.200853	0.111709	0.184942	0.196374	0.108888	0.314695
TCONS_00025177	0	0	0	0	0	0	0	0	0	0	0	0	0	0	0	0	0	0	6.23375	0	6.73315
TCONS_00025178	0	0	0	0	0	0	0	0	0	0	0	0	0	0	0	0	0	0	0	0	0
TCONS_00025179	0	0	0	0	0	0	0	0	0	0	0	0	0	0	0	0	0	0	0	0	0
TCONS_00025208	0	0	0	0	0	0	0	0	0	0	0	0	0	0	0	0	0	0	0	0	0
TCONS_00025209	0	0	0	0	0	0	0	0	0	0	0	0	0	0	0	0	0	0	0	0	0
TCONS_00025309	0	0.0151264	0.0331475	0	0	0	0.0770973	0.0144686	0.0140461	0.289244	0	0.34774	0	0.16852	0.0938371	0.076858	0	0	0.0345744	0.0837863	0.114452
TCONS_00025391	0	0.0147973	0	0.00994484	0	0.0430693	0	0.0765615	0	0	0	0.0277997	0.455937	0.254276	0.272908	0.202358	0.256864	0.179877	0.787516	0	0.428248
TCONS_00025392	0.00855031	0	0.0152526	0	0.0251151	0.0212996	0.0124864	0	0.0616294	0.0467101	0.0127188	0.0535817	0	0	0	0	0	0	0	0	0
TCONS_00025398	0	0	0	0	0	0	0	0	0	0	0	0	0	0	0	0	0	0	0	0	0
TCONS_00025401	0	0	0	0	0	0	0	0	0	0	0	0	0	0	0	0	0	0	0	0	0
TCONS_00025486	0	0	0	0	0	0	0	0	0	0	0	0	0	0	0	0	0	0	0	0	0
TCONS_00025488	0	0	0.0723078	0	0	0	0.0387277	0	0.099425	0	0	0	0	0	0	0	0	0	0	0.0267014	0
TCONS_00025521	0.0414932	0.095262	0.0470286	0.0711117	0.115177	0	0	0.0887819	0.132582	0	0	0	0.0225909	0	0.270693	0	0.0224192	0	0.165908	0	0.220321
TCONS_00025525	0.0348415	0.133509	0	0.222882	0.0656826	0.0944976	0	0.0855553	0.135628	0	0	0	0.104328	0	0	0	0.167094	0.0575154	0.244945	0	0.226985
TCONS_00025534	0	0	0	0	0	0	0	0	0	0	0	0	0.143446	0.354419	0.0747926	0.144902	0.421517	0.502809	0.216258	0.926957	0.293985
TCONS_00025535	0	0	0	0	0	0	0	0	0	0	0	0	0	0	0	0	2.53261	0	0	0	0
TCONS_00025536	0	0	0	0	0	0	0	0	0	0	0	0	0.550144	0	0	0	0	0	0	0	0
TCONS_00025537	0	0	0	0	0	0	0	0	0	0	0	0	0	0.917735	0	0	2.20963	0	2.42738	1.49825	0
TCONS_00025538	0	0	0	0	0	0.00319512	0	0	0	0	0	0	0	0	0	0	0	0	0	0	0
TCONS_00025560	0	0	0	0	0	0	0	0	0	0	0	0	0	0	0	0.285211	0	0	0	0	0
TCONS_00025610	0	0	0	0	0	0	0	0	0	0	0	0	0	0	0	0	0.220712	0.29146	0	0	0
TCONS_00025613	0	0	0	0	0	0	0	0	0	0	0	0	0.114538	0	0	0	0.083213	0	0	0.0951449	0
TCONS_00025654	0.10951	0.0158471	0.048412	0	0.130714	0	0.109773	0.177692	0	0.117109	0	0	0.118726	0.0823793	0.177484	0	0	0	0.0513963	0.395671	0.142517
TCONS_00025655	0	0	0	0	0	0	0	0	0	0	0	0	0	0	0	0	0	0	0	0.806477	0
TCONS_00025662	0	0	0.019526	0	0	0	0	0.235073	0	0	0.10515	0.164435	0.0555317	0.201221	0.2112	0	0	0	0	0	0
TCONS_00025725	0	0	0.12515	0	0	0	0.0965179	0	0	0.0614545	0	0.143597	0	0	0.031114	0.0775774	0.0368364	0	0	0.0853288	0
TCONS_00025812	0	0	0	0	0	0.0201852	0	0	0	0	0	0	0	0	0	0	0	0	0	0	0.151664
TCONS_00025840	0	0.115504	0	0.237519	0	0	0	0	0	0	0	0.0825719	0	0	0	0.216209	0.13633	0	0.297852	0	0
TCONS_00025841	0	0	0	0	0	0	0	0	0	0.158046	0	0	0	0	0	0	0.169928	0	0	0.0929492	0
TCONS_00025842	0	0	0.201175	0	0	0	0.103735	0	0.281846	0	0.0910617	0	0.218089	0.223522	0.400218	0	0.464297	0.271757	0.079019	0.465771	0.500794
TCONS_00025851	0.44151	0.110418	0.232863	0	0.225152	0	0.491064	0.22115	0.180167	0.270671	0	0.0870111	0	0	0.208493	0	0	0	0	0.12234	0
TCONS_00025977	0	0	0	0	0	0	0	0	0	0	0	0	0	0	0	0	0	0	0	0	0
TCONS_00025999	0	0	5.55372	4.66708	0	5.94941	0	5.49154	0	0	0	4.90092	0	0	0	0	0	0	0	0	0
TCONS_00026038	0	0	0	0.355864	0	0.0592846	0	0	0	0	0	0	0	0	0.342157	0.293835	1.25358	0.180666	0.12144	0.0609814	1.17756
TCONS_00026052	0	0	0.0612137	0	0	0	0	0	0	0	0	0	0	0.347951	0	0	0	0.428589	0	0	0
TCONS_00026053	0	0	0	0	0	0	0	0	0	0	0	0	0	0	0	0	0.767585	0.494253	0.648958	0	0
TCONS_00026056	0	0	0	0	0	0	0	0	0	0	0	0.10986	0	0	0.698535	0.608718	0.307717	0	0	0.506497	0.50539
TCONS_00026061	0	0.155595	0	0	0.1016	0	0	0	0	0	0	0.0991283	0.297524	0.196875	0.468551	0.328443	0.185403	0.513292	0.934558	0.369563	0.707841
TCONS_00026099	0	0.201454	0.245428	0.331077	0.209427	0.195523	0.156261	0.283932	0.187054	0.346761	0.104874	0.249846	0.207289	0.103068	0.0722388	0.148774	0.120905	0.0727829	0.0602157	0.094677	0.0761521
TCONS_00026124	0	0	0	0	0	0	0	0.0702981	0	0	0	0.0339982	0	0.265345	0	0	0.163347	0	0	0	0
TCONS_00026128	0.031733	0	0.0315998	0	0.0333301	0	0.018151	0.0383132	0.0575884	0	0.0157585	0.0331975	0	0	0	0	0	0	0	0	0
TCONS_00026129	0	0	0	0	0	0.0268094	0	0	0	0	0	0	1.29515	0	1.1729	1.40922	2.68272	1.80578	3.00625	2.28972	0
TCONS_00026136	0	0	0	0	0	0	0	0	0	0	0	0	0	0	0	0	0	0	0	0	0
TCONS_00026137	0	0	0	0	0	0	0	0	0	0	0	0	0	0	0	0	0	0	0	0	0
TCONS_00026138	0	0	0.0387509	0	0	0	0	0.0130329	0.0582881	0	0	0	0	0	2.31392	2.0495	0	0	0	0	0
TCONS_00026139	0	0	0	0	0	0	0	0	0	0	0	0	0	3.58788	0	0	0	0	0	0	0
TCONS_00026140	0	0	0	0	0	0	0	0	0	0.0636399	0	0	0	0	0	0	0	0	0	0	0
TCONS_00026141	0	0	0	0	0	0	0	0	0	0	0	0.125835	0	0	0	1.52713	0	0	0	0	0
TCONS_00026142	0	0	0	0	0	0	0	0	0	0	0	0	0	3.08537	0	0	4.9701	0	0	0	0
TCONS_00026143	0	0	0	0	0	0	0	0	0	0	0	0	8.08895	0	9.18231	4.13649	8.62861	11.4058	11.2193	11.6929	7.92537
TCONS_00026144	0.027595	0	0	0.0916627	0.109969	0	0.0687746	0.0285394	0.0250759	0	0.0957079	0	8.92874	8.16117	8.26492	3.84676	10.9534	9.10329	10.5638	12.1633	11.1792
TCONS_00026145	0.00865485	0	0.0213875	0.0198066	0.0233468	0.00386944	0.0138944	0.0162676	0.0203188	0	0.00463163	0.00698231	0.407905	0.366461	0.312675	0.383583	0.22974	0.324335	0.317703	0.0868841	0.432467
TCONS_00026155	0	0.0297669	0	0.0920025	0.0582103	0	0	0	0.0273077	0.133381	0.0274787	0.0280159	0	0	0	0.0272712	0.0262366	0	0.247296	0.275123	0.143284
TCONS_00026157	0.0122634	0.141549	0.0816133	0.0421476	0.0869543	0.110035	0.102219	0.121084	0.11415	0.153149	0.15759	0.0835815	0.214003	0.181404	0.237381	0.137672	0.364143	0.232246	0.199187	0.429292	0.117326
TCONS_00026161	0	0.0492243	0	0	0	0	0	0	0	0	0	0	0.262433	0.216067	0.362787	0	0.552725	1.30108	0.366086	0.77293	0.908196
TCONS_00026163	0	0.0616763	0	0	0	0	0	0	0	0	0	0	0.249425	0.208442	0.255971	0	0.351986	0	0.349327	0	0.605887
TCONS_00026164	0	0	0	0	0	0	0	0	0	0	0	0	0	0	0	0	0.329165	0	0	0	0
TCONS_00026168	0	0	0	0	0	0.176701	0	0	0	0	0	0	1.19672	0.687249	0	0	0	1.39503	0	0	0
TCONS_00026199	0	0	0	0	0	0	0	0	0	0	0	0	0	0	0	0	0	0	0	0	0
TCONS_00026221	0	0	0	0	0	0	0	0	0	0	0	0	0	0	0	0	0	0.471649	0	0	0
TCONS_00026224	0	0	0	0	0	0	0	0	0	0	0	0	0	0	0	0	0	0	0	0	0
TCONS_00026247	0	0	0	0	0	0	0	0	0	0	0	0	2.42436	0	0	0	0	0.795469	0	0	0
TCONS_00026266	0	0	0.0142415	0	0	0	0	0	0	0	0	0	0	0	0.0980144	0	0	0	0	0	0
TCONS_00026335	0	0	0	0	0	0	0	0	0	0	0	0	0	0	0	0	0.548781	0	0	2.17808	0
TCONS_00026365	0.808212	0.585153	0.370338	1.23951	0.304744	0.737527	0	0.418794	0	0	1.1582	0.119254	0.213973	0.139473	0	0.110671	0	0.198666	0.0435327	0	0.116185
TCONS_00026396	0	0	0	0	0	0	0	0	0	0	0	0	0	0	0.431352	0.116871	0.230412	0.0973955	0.185068	0.209953	0.550142
TCONS_00026465	0	0	0	0	0	0	0	0	0	0	0	0	0	0	0	0	0	0	0	0	0
TCONS_00026466	0	0	0	0	0	0	0	0	0	0	0	0	0	0	0	0	0	0	0	0	0
TCONS_00026467	0	0	0	0	0	0	0	0	0	0	0	0	0	0	0	0	0	0	0	0	0
TCONS_00026472	0	0	0	0	0	0	0	0	0	0	0	0.0979828	0	0	0	0	0	0	0	0	0
TCONS_00026473	0	0	0	0	0	0	0	0	0	0	0	0	0	0	0	0	0	0	0	0	0
TCONS_00026476	0	0	0	0	0	0	0	0	0	0	0	0	0	0	0	0	0	0	0	0	0
TCONS_00026495	0	0	0	0	0	0.101089	0	0	0	0	0.204645	0.154837	0	0	0	0	0	0	0	0	0
TCONS_00026539	0.112298	0	0	0	0	0	0	0	0.16678	0	0.103608	0	0	0	0	0	0	0	0	0	0
TCONS_00026540	0	0	0	0	0	0	0	0	0	0	0	0	0	0	0	0	0	0	0.36433	0	0
TCONS_00026541	0	0.301459	0	0	0	0	0	0.525725	0	0	0	0	0	2.3615	0	0	3.30628	2.31211	0	2.60891	0
TCONS_00026542	0	0	0	0	0	0	0	0	0	0	0	0	0	0	0	0	0	0	0	0	0
TCONS_00026543	0	0	0	0	0	0	0	0	0	0	0	0	0	0	0	0	0	0	0	0	0
TCONS_00026544	0	0	0	0	0	0	0	0	0	0	0	0	0	0	3.24034	0	0	0	0	0	1.95941
TCONS_00026545	0	0.0399802	0	0.0940583	0	0	0.00467164	0	0	0	0.0726532	0.0698759	0.134877	0	0.299254	0	0.159774	0.201835	0.231715	0.142644	0
TCONS_00026607	0	0	0	0	0	0	0	0	0	0	0	0	0	0.414994	0.498134	0	0.402607	0.299309	0.463913	0.264141	0.507669
TCONS_00026608	0	0	0	0	0	0	0	0	0	0	0	0	0.0729105	0	0	0	0.67281	0	0.559208	0.559017	0
TCONS_00026609	0	0.098902	0	0	0	0	0	0	0	0	0	0.0655433	0	0.0942478	0	0.0313891	0	0.0932004	0	0	0.625324
TCONS_00026619	0	0	0	0	0	0	0	0	0	0	0	0	0	0	0	0	0	0	0	0	0
TCONS_00026623	0.0288544	0	0	0.081929	0	0.0335637	0.0995888	0	0	0.595433	0.723115	0.642367	0.429376	0.116325	0.0539801	0	0.037614	0.103379	0.270794	0.055354	0.185112
TCONS_00026723	0	0	0	0	0	0	0.0109714	0	0	0	0	0.0218138	0.236337	0.289713	0.232293	0.177223	0.322145	0.316119	0.439377	0.561584	1.12446
TCONS_00026724	0	0.0226873	0	0.0366665	0	0.0351945	0	0	0.0106203	0	0	0	0	0	0	0	0	0	0	0	0
TCONS_00026759	0	0	0	0	0.0324101	0	0	0	0	0	0	0	0	0	0	0	0	0	0	0	0
TCONS_00026807	0	0	0	0.00880364	0	0.00908694	0	0	0.00818949	0	0	0	0.0270361	0.182908	0.198067	0.0177433	0.0537567	0.127746	0.0788665	0.46617	0.498507
TCONS_00026811	0	0	0	0	0	0	0	0	0	0	0	0	0	0	0	0	0.447361	0	0	1.03939	0
TCONS_00026817	0	0	0	0	0	0	0	0	0	0	0	0.036299	0	0	0.0717953	0.125209	0	0.0898798	0	0.645926	0
TCONS_00026818	0	0	0	0	0	0	0	0	0	0	0	0	0	0	0	0	0.199614	0	0.256731	0	0.672816
TCONS_00026837	0	0	0	0	0	0	0	0	0	0	0	0	0	0	0	0	0	0	0	0	0
TCONS_00026889	0	0	0.515531	0	0	0	0	0.0898456	0	0	0	0	0	0	0	0.488552	0.939208	0	0	0.434047	0
TCONS_00026893	0.108198	0	0	0	0.0409083	0.531014	0	0	0	0	0	0	0	0	1.94519	0	6.01805	0	0	0	0
TCONS_00026894	0	0	0	0	0	0	0	0	0	0	0	0	0	0	1.13809	0	0	0	2.31887	2.23231	2.25056
TCONS_00026895	0	0	0	0	0	0	0	0.19023	0	0	0	0	2.33059	1.50449	1.41882	2.8512	3.1484	3.71414	5.99917	4.19217	3.91408
TCONS_00026896	0	0	0	0	0	0	0	0	0	0.108199	0	0.245225	0	3.05323	1.61868	0	2.73063	0	3.37217	2.36628	2.078
TCONS_00026900	0	0	0	0	0	0	0	0	0	0.280173	0	0	0	0	0	0	0	0	0	0	0
TCONS_00026908	0	0	0	0	0	0	0	0	0	0	0	0	0.0343245	0	0	0	0.031637	0	0.478232	0.158617	0.0962418
TCONS_00027010	0	0.134867	0.0885099	0.117558	0.0220559	0.0872458	0	0	0.0737299	0.18154	0	0	0	0	0	0	0	0	0	0	0.357152
TCONS_00027011	0	0	0	0	0	0	0	0	0	0	0	0	0	0	0.118517	0.11118	0	0.309955	0	0	0
TCONS_00027012	0	0	0	0	0	0	0	0	0	0	0	0	0.114856	0.374409	0	0	0	0	0	0	0.28517
TCONS_00027013	0	0	0	0	0	0	0	0	0	0	0	0	0.256167	0	0	0	0	0	0	0	0
TCONS_00027018	0	0	0	0	0	0	0	0	0	0	0	0	0	0	0	0	0	0	0	0	0
TCONS_00027063	0	0	0	0	3.79781	1.23766	0	0	0.562709	0	0	8.99273	0	0	0	0	0	0	0	0	0
TCONS_00027280	0	0	0	0	0	0	0	0	0	0	0	0	0	0	0	0	0	0	0	0	0
TCONS_00027281	0	0	0	0	0	0	0	0	0	0	0	0	0	0	0	0	0	0	0	0	0
TCONS_00027282	0	0	0	0	0	0	0	0	0	0	0	0	0	0	0	0	0	0	0	0	0
TCONS_00027383	0.0657618	0	0	0	0	0	0	0.0231945	0	0.0279567	0	0	0.144238	0	0	0	0	0	0.343706	0	0.0807144
TCONS_00027384	0	0	0	0.0473112	0	0	0.0266309	0	0	0	0	0	0	0	0	0	0.210892	0	0	0.251414	0.10291
TCONS_00027413	0.0155963	0.0430903	0.051087	0	0.0107099	0.0493986	0.0350472	0.012788	0.00969095	0	0.0556033	0.0376774	0	0.536901	0.974538	0.658123	0.954628	0.692433	1.11947	0.708155	1.45055
TCONS_00027416	0.061027	0.110281	0.0858776	0.0884655	0.101504	0.128063	0.0963068	0.0374867	0.0614272	0.309261	0.0615609	0.0930826	0.476161	0.610943	0.46567	0.31777	0.391674	0.312197	0.769604	0.390006	0.854631
TCONS_00027418	0.073263	0	0.0274525	0.0218014	0.0207257	0.178437	0.0394391	0.050512	0.0922174	0.143694	0.0991346	0.280693	0	0.417498	0.257699	0.09744	0.596532	0.174631	0.574864	0.366001	0.289509
TCONS_00027511	1.72964	1.13206	1.60031	1.76478	0.930638	0.624058	0.975126	2.63852	1.32263	2.07912	1.64482	1.74205	0.793936	0.464329	0.979461	0.937952	0.0902606	1.04549	0.511324	0.363857	1.33944
TCONS_00027595	0	0	0.0577027	0	0	0	0.0237584	0	0.036612	0	0	0.108186	0	0	0	0	0	0	0.182823	0.156695	0
TCONS_00027602	0	0	0	0	0	0	0	0	0	0	0	0	0	0	0	0	0	0	0	0.67817	0
TCONS_00027620	0	0	0	0	0	0	0	0	0	0	0	0	0	0	0	0	0	0	0	0	0
TCONS_00027621	0	0	0	0	0	0	0	0	0	0	0	0	0	0	0	0	0	0	0	0	0
TCONS_00027622	0	0	0	0	0	0	0	0	0	0	0	0	0	0	0	0	0	0	0	0	0
TCONS_00027635	0	0	0	0	0	0	0	0	0	0	0	0	0	0	0	0	0	0	0	0	0
TCONS_00027636	0	0	0	0	0	0	0	0	0	0	0	0	0	0	0	0	0	0	0	0	0
TCONS_00027637	0	0	0	0	0	0	0	0	0	0	0	0	0	0	0	0	0	0	0	0	0
TCONS_00027753	0	0	0	0	0	0	0	0	0	0	0	0	0	0	0	0	0	0	0	0	0
TCONS_00027796	0	0	0.0165737	0	0	0	0	0	0.0548652	0	0	0	0.0897759	0	0.0607047	0.0433588	0.091448	0.0662087	0.165709	0.158258	0.0539698
TCONS_00027799	0	0	0	0	0	0	0	0	0	0	0	0	0	0.0880927	0.0206795	0	0	0.0587127	0.165612	0	0.127497
TCONS_00027801	0	0	0.0157287	0	0	0	0	0	0	0	0	0	0.135939	0	0	0	0	0	0	0.215159	0
TCONS_00027802	0	0	0	0	0	0	0	0	0	0	0	0	0	0	0	0	0	0	0	0.146018	0.205813
TCONS_00027803	0	0	0	0	0	0	0	0	0	0	0	0	0	0	0	0	0	0	0.515107	0	0
TCONS_00027807	0	0	0	0	0	0	0	0	0	0	0	0	0	0.522146	0	0	0.200178	0	0	0.89	0.34397
TCONS_00027809	0.0283376	0.015813	0	0	0	0.0160509	0.036808	0	0.00722505	0	0	0.0314361	0.205368	0.039221	0	0	0.151303	0	0.149668	0.377912	0.121271
TCONS_00027888	0	0.0115007	0	0	0	0.00691616	0	0	0	0.240551	0	0	0	0.827675	0	0	0	0	0	0	0
TCONS_00027891	0.0323241	0	0	0	0	0	0	0	0	0	0	0	0	0	0	0	0	0	0	0.615961	0
TCONS_00027945	0	0	0	0	0	0	0	0	0	0	0	0	0	0	0	0	0.433936	0	0.185895	0.138398	0
TCONS_00027946	0	0	0	0	0	0	0	0	0	0	0	0	0	0	0	0	0.346424	0	0	0	0
TCONS_00027947	0	0.137607	0	0	0	0	0	0	0	0.187536	0	0	0	0.104836	0	0	0	0.0238243	0	0	0.374402
TCONS_00028125	0	0	0	0	0	0	0	0	0	0	0	0	0	0	0	0	0	0	0	0	0
TCONS_00028126	0	0	0	0	0	0	0	0	0	0	0	0	0	0	0	0	0	0	0	0	0
TCONS_00028214	0	0	0	0	0	0	0	0	0	0	0.356661	0	0	0	0	0	0	0	0	0	0
TCONS_00028217	0	0	0	0	0	0	0	0	0	0.351068	0	0.0771621	0	0.609694	0	0.767418	0.331703	0.314906	0	0.522227	0
TCONS_00028242	0	0	0	0	0	0	0	0	0	0	0	0	0	0	0.338033	0	0	0	0	0	0
TCONS_00028268	0	0	0	0	0	0	0	0	0.248931	0	0.67859	0	0	0	0	0	0	0	0	0	0
TCONS_00028276	0	0	0	0	0	0	0	0	0	0	0	0.0179054	0	0	0.417723	0	0	0	0	0	0.526255
TCONS_00028383	1.03039	0.843595	2.97311	0.885368	0.202776	1.41151	0.471252	1.9183	1.72808	2.64379	0	1.86142	0.277097	0.602919	0.311494	0.848493	0	0.537944	0.722267	0.524632	0.553157
TCONS_00028427	0	0.149976	0.148018	0.0779495	0	0	0	0	0	0	0.738847	0	0	0	0	0	0	0	0	0	0
TCONS_00028452	0.207031	0.16959	0.0861009	0.388496	0.055306	0	0.105127	0.243956	0.0621001	0	0.341747	0.0980137	0	0	0	0.0311218	0.0668377	0.0523109	0.0342665	0.0496629	0.0599037
TCONS_00028459	0	0.228666	0	0	0.341721	0.153434	0.243171	0.16218	0.324916	0	0	0.203157	0.378018	0.164326	0.143781	0.0682237	0	0.132026	0.212674	0.0831394	0.118897
TCONS_00028523	0	0.014049	0	0	0	0	0	0	0	0	0	0.0135415	0	0	0	0.0863723	0.131507	0.187795	0.304302	0.250704	0.554382
TCONS_00028553	0	0	0	0	0	0	0	0	0	0	0	0	0	0	0	0	0	0	0.151195	0.0518909	0.805059
TCONS_00028554	0	0	0	0	0	0	0	0	0	0	0	0	0.736513	0	0.156317	0.218068	0.277353	0	0.150856	0	0.461079
TCONS_00028568	0	0	0	0	0	0	0	0	0	0	0	0.00702302	0.161432	0.238284	0	0.0484415	0.0119513	0.0120443	0.172776	0.106318	0.242617
TCONS_00028572	0.181751	0.102921	0	0.106502	0	0	0	0	0.186218	0	0	0	0	0.100487	0	0	0	0	0.0832218	0	0
TCONS_00028577	0	0	0.540063	0	0	0	0.153376	0	0	0	0	0	0.152924	2.28423	0.844764	0	0.503851	0	0	0	0
TCONS_00028607	0	0	0	0	0	0	0	0	0	0	0	0	0	0	0	0	0	0	0	0	0
TCONS_00028608	0	0	0	0	0	0	0	0	0	0	0	0	0.503595	0	0	0	0	0	0	0	0
TCONS_00028609	0	0	0	0	0	0	0	0	0	0	0	0	1.50442	4.62035	1.62513	1.21931	4.56435	1.92749	8.57828	10.9271	6.1979
TCONS_00028610	0	0	0	0	0	0	0	0	0	0	0	0	0.447099	0	0.236322	0.391465	1.84471	0.683659	1.79059	1.19291	1.8367
TCONS_00028652	0.81076	0.769082	1.70051	2.17971	2.22157	1.94291	1.9257	1.89813	1.54144	3.53802	2.07204	2.65564	1.37853	3.14174	1.18954	3.3316	0.298703	1.36317	2.00102	0.743087	2.41688
TCONS_00028668	0	0.390815	0.5654	0.704783	0.871355	2.13448	0.467726	1.32685	0.881587	1.55388	1.10171	1.82052	0.366876	0.689803	0.392936	1.47173	0.188397	1.01134	0.38229	0.0468432	0
TCONS_00028703	0	0	0	0	0	0	0	0	0	0	0	0	0	0	0	0	0	0	0	0	0.349226
TCONS_00028708	0	0	0	0	0	0	0	0	0	0	0	0	0	0	0	0	0	0	0	0	0
TCONS_00028799	0	0	0	0	0	0	0	0	0	0	0	0	0	0	1.86525	0	0	0	0	0	0
TCONS_00028861	0.36334	0.394483	0.541671	0.297919	0.53375	0.751989	0.785762	0.296598	0.697651	0.585804	0.414199	0.150493	0	0	0.196411	0.104972	0	0.0352704	0	0.0344258	0
TCONS_00028910	0	0	0	0	0	0	0	0	0.0253456	0	0	0	0	0	0	0	0	0.312272	0	0	0
TCONS_00028922	0	0	0	0	0	0	0	0	0	0	0	0	0.0370645	0	0	0	0	0	0.0308994	0	0.419245
TCONS_00028927	0	0	0.0285079	0	0	0.0585589	0	0	0.0261096	0	0.0283196	0	0.0816305	0.0555968	0.174156	0.025069	0.0748526	0.296825	0	0.0245875	0
TCONS_00028933	0	0	0	0	0	0	0	0	0.0868589	0	0	0	0	0	0	0	0	0	0	2.09577	0
TCONS_00028934	0	0	0	0	0	0	0	0	0	0	0	0	0	0	0	0	0	0	0	0	0
TCONS_00028935	0	0	0	0	0	0	0	0	0	0	0	0	0	0	0	0	0	0	0	0	0
TCONS_00028943	0	0.0932206	0	0	0	0	0	0	0	0	0	0	0	0	0	0	0	0	0	0	0
TCONS_00028998	0	0	0	0	0	0	0	0	0	0	0	0	0	0	0	0	2.92369	0	2.38156	0.287812	0.302599
TCONS_00028999	0	0	0	0	0	0	0	0	0	0	0	0	0	0	0	0	1.57178	0.304725	2.0067	0	0
TCONS_00029098	0	0	0	0	0	0	0	0	0	0	0	0	0	0.782803	0	0	0.485211	0.36546	0	0.832185	0
TCONS_00029099	0	0	0	0	0	0	0	0	0	0	0	0.00298357	0	0	0	0	0	0	0.233964	0	0.187978
TCONS_00029100	0	0	0	0	0	0	0	0	0	0	0	0	0.288295	0	0.221203	0	0.0872003	0	0.378787	0.421246	0.445834
TCONS_00029101	0	0	0	0	0	0	0	0	0	0	0	0	0	0	0	0	0	0	1.05962	0	0
TCONS_00029102	0	0	0	0	0	0	0.0131654	0	0	0	0	0	0	0	0	0	0.081029	0	0	0	0
TCONS_00029115	0.0424564	0	0.0305907	0	0.0211879	0.0138284	0.0751434	0	0	0.149029	0.066504	0	0.143831	0.102036	0.153603	0.273443	0	0	0	0.152041	0
TCONS_00029116	0	0.0331066	0	0	0	0	0	0	0	0	0	0	0	0	0	0	0	0	0	0	0
TCONS_00029160	0	0.00675213	0	0.0205856	0.00660004	0	0	0	0	0	0	0	0.0645496	0.025173	0.195359	0.0484167	0	0.0516801	0	0.0650461	0.241236
TCONS_00029163	0	0	0	0	0	0	0	0	0	0	0	0	0	0	0	0	0	0	0	0	0
TCONS_00029164	0	0	0	0	0	0	0	0	0	0	0	0	0	0	0.102345	0.138961	0	0	0.412177	0.140865	0
TCONS_00029165	0	0	0	0	0	0	0	0	0	0	0	0	0	0	0	0	0	0	0	0.060158	0.197466
TCONS_00029287	0	0	0	0	0	0	0	0	0	0	0	0	0.444068	8.35369	0	4.3923	0	0.52943	0	1.48522	4.36559
TCONS_00029472	0	0	0	0	0	0	0	0	0	0	0	0	0	0	0	0	0	0	0	0	0
TCONS_00029473	0	0	0	0	0	0	0	0	0	0	0	0	0	0	0	0	0	0	0	0	0
TCONS_00029535	0	0	0.0264968	0	0	0	0	0	0	0	0	0.0436123	0.333456	0	0	0.278629	0.358295	0.202981	0.241294	0	0.186391
TCONS_00029536	0	0	0	0.0409856	0	0	0.0941552	0	0.0414944	0	0	0	0.364313	0.133281	0.514501	0	0.350715	0.267138	0.447093	1.32782	0
TCONS_00029537	0	0	0	0	0	0	0	0	0	0	0	0	0	0.360887	0	0	0.488652	0.26311	0	0	0
TCONS_00029539	0.0113602	0	0	0.0119353	0	0.00409747	0	0	0.0189475	0	0.0398067	0.00583908	0.0932424	0.200685	0	0.031907	0.0779309	0.182014	0.144401	0.0523561	0.421964
TCONS_00029540	0	0	0	0	0	0	0	0	0	0	0	0	0	0	0	0	0	0	0	0	0
TCONS_00029541	0	0	0	0	0	0.0245486	0	0	0.00312042	0	0	0	0	0	0	0	0.0698267	0	0	0	0
TCONS_00029542	0	0.0133825	0.0135446	0.0294362	0.0228285	0	0.00231536	0.013043	0	0	0	0.0203674	0	0	0	0.122769	0	0	0	0	0.354683
TCONS_00029543	0	0	0	0	0	0	0.000820879	0	0	0	0	0	0.112149	0	0	0	0	0	0	0	0
TCONS_00029549	0	0	0	0	0	0	0	0	0	0	0	0	0	0	0	0	0	0	0	0.166871	0
TCONS_00029553	0	0	0	0	0	0	0	0	0	0	0	0	0	0	0	0	0.727756	0	0	0	0
TCONS_00029554	0	0	0	0	0	0	0	0	0	0	0	0	0	0	0	0	0	0	0	0	0
TCONS_00029555	0	0	0	0	0	0	0	0	0	0	0	0	0	0	0	0	0	0	0	0	0
TCONS_00029573	0	0	0	0	0	0	0	0	0	0	0	0	0	0	0	0	0	0	0	0	0
TCONS_00029574	0	0	0	0	0	0	0	0	0.0155904	0	0	0	0	0	0	0	0.944765	0.574052	1.04271	1.05042	2.6958
TCONS_00029584	0	0	0	0.0194416	0	0	0	0.0804896	0	0	0	0	0	0	0	0	0	0	0	0	0
TCONS_00029636	0	0	0	0	0	0	0	0	0	0	0	0	0	0.229213	0.773219	0.177652	0.308396	0.297281	0.598724	0.139409	0.568457
TCONS_00029642	0	0	0	0.0238941	0	0	0	0	0	0	0	0	0.268372	0	0	0	0.150411	0.192794	0	0.190487	0.752409
TCONS_00029644	0	0	0	0	0	0	0	0	0	0	0	0	0	0.446655	0	0.122809	0	0	0	0.13295	0
TCONS_00029801	0.123167	0	0	0	0	0	0	0	0	0	0	0	0	0	0	0	0	0	0	0	0
TCONS_00029849	0	0	0	0	0	0	0	0	0	0	0	0	0	0	0	0	0	0	0	0	0
TCONS_00029880	0	0	0	0	0	0	0	0	0	0	0	0	0.125909	0.394096	0	0	0.85559	0.525313	0.65659	0.587641	1.1499
TCONS_00029881	0	0	0	0	0	0.0362245	0.0641776	0	0	0	0	0.0664383	0.098172	0.0332328	0.0349236	0.256346	0	0.0849221	0	0.0279078	0.11377
TCONS_00029928	0.0313365	0.0667561	0	0.0970561	0.0221514	0.0744115	0.0518554	0	0.0307655	0	0.0339892	0	0	0	0	0	0	0	0	0.30391	0
TCONS_00029952	0.0428447	0.0847177	0	0	0	0	0	0	0	0.266541	0.0081986	0.0507908	0.0990303	0	0	0.051479	0	0.0807276	0.0703595	0.128964	0.158379
TCONS_00029977	0.31856	0.113682	0.282289	0.132426	0.126382	0.165628	0.0923869	0.209217	0.14197	0.158491	0.0658568	0.177952	0.107205	0.142299	0.172011	0.136522	0.0294004	0.171585	0.142316	0.0686764	0.179402
TCONS_00029981	0.169897	0.121607	0	0	0.0997057	0	0.168193	0	0	0	0	0	0.12677	0.228638	0.0967407	0	0	0.0882196	0.156001	0.121837	0.281493
TCONS_00029982	0	0.128947	0	0	0	0	0	0	0	0	0.0497679	0	0	0	0.140555	0	0.213783	0	0.179488	0.129893	0.14946
TCONS_00029984	0	0	0	0.770687	0.707415	0	0	0	0	0	0.766842	0.151302	0	0.442488	0	0.805199	0	0	0.439992	0	0
TCONS_00029988	0	0	0	0	0	0	0	0	0	0	0	0	0	0	0	0	0	0	0	0	0
TCONS_00029990	0.00775256	0.0441546	0.00851407	0	0	0	0.0407039	0.079898	0.0717056	0.0674958	0.121427	0.256752	0.179939	0.385034	0	0.0331346	0	0	0.0593989	0	0
TCONS_00030105	0.0301037	0	0.0333534	0.0111072	0	0.0669626	0	0	0.0399645	0	0	0	0	0	0	0.0362248	0.0283399	0.0816172	0	0.155215	0.174435
TCONS_00030106	0	0	0	0	0	0	0	0	0	0	0	0	0	0	0.414963	0	0	0	0	1.18414	0
TCONS_00030245	0.048375	0.104937	0.15554	0	0.177291	0.162795	0.145881	0	0	0	0	0.546523	0.40805	0	0.107533	0.0686702	0.184323	0.0355149	0	0.14869	0
TCONS_00030305	0	0	2.19935	0	0	0	0	0	0	0	26.4478	5.3562	0	0	0	0	1.97228	4.00898	0	0	0
TCONS_00030344	0	0.0119798	0.0507981	0.0291147	0.03492	0	0	0.0274631	0.0538656	0.10161	0.0769294	0.969451	27.2035	15.6017	21.9827	15.9158	28.4735	26.4212	23.3483	25.0905	17.6385
TCONS_00030346	0	0	0	0	0	0	0.0734784	0	0	0	0	0	0	0	0	0	0	0	0	0	0
TCONS_00030348	0	0	0	0	0	0	0	0	0	0	0	0	0	0	0	0	0	0	0	0	0
TCONS_00030349	0	0.0219477	0	0	0	0	0	0	0	0	0.089485	1.0789	38.1239	18.5072	25.6118	21.6381	34.0677	0	27.4349	0	23.3948
TCONS_00030350	0	0	0	0	0	0	0	0	0	0	0	0	0	0	0	0	0	0	0	0	0
TCONS_00030351	0	0	0	0	0	0	0	0	0	0	0	0	0	0	0	0	0	0	0	0	0
TCONS_00030356	0	0	0	0	0	0	0	0	0	0	0	0	3.20618	0	0	0	0	0	0	0	0
TCONS_00030357	0	0	0	0	0	0	0	0	0	0	0	0	0	0	0	0	0.215299	0.757604	0	0	0.292925
TCONS_00030359	0	0	0	0	0	0	0	0	0	0	0	0	0.027602	0	0	0	0	0	0.05687	0	0.149702
TCONS_00030361	0	0	0	0	0	0	0	0	0	0	0	0	0.104493	0.107034	0.19746	0.0607763	0.367603	0.169829	0.367225	0.428794	0.231397
TCONS_00030363	0	0	0	0	0	0.0435006	0.039314	0	0	0	0	0	0	0	0	0	0.551786	0.133815	0	0.461994	0
TCONS_00030364	0	0	0	0	0	0	0	0	0	0	0	0	0.128981	0	0	0.130405	0	0	0	0.423523	0.333389
TCONS_00030371	0	0	0	0	0	0	0	0	0	0	0	0	0	0	0.0461018	0	0	0	0	0	0
TCONS_00030374	0	0	0.137457	0	0.270939	0.17906	0	0	0.298436	0	0	0	0	0	0	0	0	0.0545907	0.0417884	0.0224649	0
TCONS_00030375	0	0	0	0	0	0	0	0	0	0	0.244527	0	0.0214227	0	0	0	0	0	0	0	0
TCONS_00030377	0.337011	0	0	0	0	0	0	0	0	0	2.06193	0	0.529587	0.340114	0.318123	0	0	0	0	0	0
TCONS_00030388	0	0	0	0	0	0	0	0	0	0	0	0	0	0	0	0	0	0	0	0	0
TCONS_00030645	0	0.0122062	0.0201006	0.00820381	0.0119277	0.0127641	0.00381951	0	0	0	0.0158167	0.0238601	0.292001	0.453887	0.366325	0.606751	0.313529	0.535759	0.730437	0	0.604346
TCONS_00030646	0	0	0	0	0	0	0	0	0	0	0	0	0	0	0	0	0	0	0	0	0
TCONS_00030647	0	0	0	0	0	0	0	0	0	0	0	0	0	0	0	0	0	0	0	2.43554	0
TCONS_00030648	0	0	0	0	0	0	0	0	0	0	0	0	0	0	0	0	0	0	0	0	0
TCONS_00030665	0	0	0	0	0	0.0113103	0	0	0	0	0	0.00531999	0	0	0	0	0	0	0	0.326437	0.397834
TCONS_00030683	0	0	0	0	0	0	0	0	0	0	0	0	0	1.23227	0.280493	0.114384	1.02358	0.460449	0	0.899714	0.761779
TCONS_00030684	0	0	0	0	0	0	0	0	0	0	0	0.0746054	1.1421	0	0	0.127571	0.683431	1.07308	0.62767	0	0.731926
TCONS_00030685	0	0	0	0	0	0	0	0	0	0	0	0	1.13444	1.9124	2.88234	0	1.55093	0	7.94447	2.86055	5.10299
TCONS_00030686	0	0	0	0	0	0	0	0	0	0	0	0	1.08243	1.00528	1.62809	1.34866	1.15077	0.769366	0	3.66891	4.67317
TCONS_00030692	0	0	0	0	0	0	0	0	0	0	0	0	0	0	0	0	0	0	0	0	0
TCONS_00030693	0	0	0	0	0	0	0	0	0	0	0	0	0	0	0	0	0	0	0	0	0
TCONS_00030694	0	0	0	0	0	0	0	0	0	0	0	0	0	0	0	0	0	0	0	0	0
TCONS_00030702	0.0400349	0	0	0	0	0	0	0	0	0	0	0	0.966425	0.502059	2.53987	0.712997	0	0.841313	1.0831	1.31314	1.17935
TCONS_00030728	0	0.0433152	0.0424649	0.0440284	0	0	0.0589193	0	0.0594403	0	0.0208674	0	0	0.246498	0.240691	0	0	0	0.422241	0.257341	0
TCONS_00030730	0.0349476	0	0	0	0	0	0	0.0192763	0	0	0	0	0	0	0	0	0.387572	0.161988	0	0.0364951	0.588434
TCONS_00030772	0	0	0	0	0	0	0	0	0	0	0	0	0	0	0	0	0	0	0	0	0
TCONS_00030773	0	0	0	0	0	0	0	0	0	0	0	0	0	0	0	0	0	0	0	0	0
TCONS_00030774	0	0	0	0	0	0	0	0	0	0	0	0	0	0	0	0	0	0	0	0	0
TCONS_00030775	0	0	0	0	0	0	0	0	0	0	0	0	0	0	0	0	0	0	0	0	0
TCONS_00030776	0	0	0	0	0	0	0	0	0	0	0	0	0	0	0	0	0	0	0	0	0
TCONS_00030777	0	0	0	0	0	0	0	0	0	0	0	0	0	0	0	0	0	0	0	0	0
TCONS_00030788	0	0	0	0	0	0	0	0	0	0	0	0	0.11781	0	0.129778	0	0.215013	0.428103	0.471876	0.722611	0.588853
TCONS_00030806	0	0	0	0	0	31.6688	2.2622	0	0	0	0	0	3.72181	0	0	3.52786	0	0	0	0	0
TCONS_00030807	0	0.579741	0	0.458679	0	0	0.806328	0	0.627138	0	0	0	0	0	0	0	0	0	0	0	0
TCONS_00030808	0	0	0	0	0	0	0	0	0	0	0	0	0	0	0	0	0	0	0	0	0
TCONS_00030858	0	0	0	0	0	0	0	0	0	0	0	0	0	0.451511	1.79352	0.524682	0.203659	0.125587	1.20224	0.440218	0.620813
TCONS_00031004	11.1559	15.0883	13.4438	7.02163	18.8479	9.49917	10.7842	9.18984	9.49753	17.957	8.02373	10.0696	38.0939	39.5189	35.9747	30.2023	45.5359	31.3365	44.836	41.1569	33.6532
TCONS_00031145	0	0	0	0	0	0	0	0	0	0	0	0	0	0	0	0	0	0	0	0	0
TCONS_00031155	0	0	0	0	0	0	0	0	0	0	0	0	0	0	0	0	0	0	0	0	0
TCONS_00031184	0.0127315	0	0	0	0	0.0202395	0.0123573	0	0	0.0555115	0.0272144	0.101277	0.0724497	0	0	0.103892	0.0630512	0.261861	0.0762999	0.118479	0.126142
TCONS_00031222	0	0.318868	0	0.0569751	0	0	0.104913	0	0	0	0	0	0.0268995	0.219132	0.0293707	0.0775977	0.0271555	0	0	0	0.0263416
TCONS_00031329	0	0	0	0	0	0	0	0	0	0	0	0	0	0	0	0	0	0	0.0749226	0.148598	0
TCONS_00031330	0	0	0	0	0	0	0	0	0	0	0	0	0.437118	0.280107	0.192262	0	0	0.0400219	0.504957	0.641642	0.127288
TCONS_00031331	0	0	0	0	0	0	0	0	0	0	0	0	0.358067	0	0.37055	0	0.136079	0.0612556	0.127885	0	0.277194
TCONS_00031333	0	0	0	0.0287617	0	0	0	0	0	0	0	0	0	0	0	0	0.0919692	0	0.0762656	0.604142	0
TCONS_00031455	0	0.0439077	0	0.0320214	0.0186789	0.00906014	0.0246817	0	0.0559469	0.114186	0	0.0227645	0	0.0438649	0	0.134329	0.0393076	0.17613	0.04779	0.0881279	0.090376
TCONS_00031485	0	0	0	0	0	0	0	0	0	0	0	0	0	0	0	0	0	0	0	0	0
TCONS_00031486	0	0	0	0	0	0	0	0	0	0	0	0	0	0	0	0	0	0	0	0	0
TCONS_00031487	0	0	0	0	0	0	0	0	0	0	0	0	0	0	0	0	0	0	0	0	0
TCONS_00031488	0	0	0	0	0	0	0	0	0	0	0	0	0	0	0	0	0	0	0	0	0
TCONS_00031489	0	0	0	0	0	0	0	0	0	0	0	0	0	0	0	0	0	0	0	0	0
TCONS_00031490	0	0	0	0	0	0	0	0	0	0	0	0	0	0	0	0	0	0	0	0	0
TCONS_00031491	0	0	0	0	0	0	0	0	0	0	0	0	0	0	0	0	0	0	0	0	0
TCONS_00031526	0	0.0282493	0.0860935	0	0.0552716	0	0	0	0	0	0	0	0.188966	0.298393	0.229178	0.0464931	0.116941	0.23517	0.345813	0.0921233	0.409205
TCONS_00031542	0	0	0	0	0	0	0	0	0	0	0	0	0	0	0	0	0	0	0	0	0
TCONS_00031553	0	0	0	0	0	0	0	0	0	0	0	0.162555	0	0	0	0	0	0	0	0	0.431351
TCONS_00031649	1.3928	0.358796	1.24316	0.76824	0	0.570286	0.371088	1.19443	0.5849	0.799945	0.787669	0	0.670215	0	0.668153	1.02414	0.166493	0.512205	0.209802	0.286737	0.522858
TCONS_00031654	0	0	0	0	0	0	0	0	0	0	0	0	0	0	0	0	0	0	0	0	0
TCONS_00031765	0	0	0	0.0722932	0	0	0	0	0	0	0	0	0	0	0	0.295223	0.428463	0	0	0	0
TCONS_00031888	0	0.570973	0	0	0	0	0	0	0.21866	0	0	0	0.207507	0	0	0.0723985	0.147059	0	0.0866021	0.11246	0
TCONS_00031889	0	0	0.265339	0.15312	0	0	0.34266	0.242166	0.0743568	0	0	0.0500433	0	0	0.207505	0	0	0	0	0	0
TCONS_00031947	14.6637	10.7825	15.7715	15.2248	10.696	14.936	13.2339	18.4456	9.17201	13.7665	10.0743	12.3701	6.41116	4.68094	8.94435	11.9449	2.4039	7.20992	5.03967	2.53267	9.18504
TCONS_00032060	0.105042	0	0.0836671	0	0	0.0524982	0.148007	0.0519958	0	0	0.0423405	0.0186277	0	0.0127117	0	0.0422129	0	0	0.0181107	0	0.0229769
TCONS_00032061	0	0	0	0	0	0	0	0	0	0	0	0.0439391	0.0176389	0	0.00655613	0	0	0	0	0.0011984	0
TCONS_00032062	0	0.0711913	0.0541856	0.137081	0.0205672	0.0429731	0.0429752	0	0	0	0	0.0320491	0	0	0	0.00707637	0	0	0	0	0
TCONS_00032063	0	0	0	0	0	0	0	0	0	0	0	0	0	0.0226406	0.00596707	0	0	0	0	0.00160707	0
TCONS_00032069	0	0	0	0	0	0	0	0	0	0	0	0	0	0	0	0	0.165393	0	0	0	0
TCONS_00032201	0	0.085359	0.112627	0.137243	0.185826	0	0.0674911	0.107493	0.1255	0.237876	0.208009	0.141594	0.0827994	0.0102682	0.0986416	0.0607918	0.073174	0.0516792	0.041984	0.0210929	0.0634525
TCONS_00032220	0	0	0	0	0	0	0	0	0	0	0	0	0	0	0	0	0	0	0	0	0
TCONS_00032285	0	0	0	0	0	0	0	0	0	0	0	0	0	0	0	0	0	0	0	0.352694	0
TCONS_00032286	0	0	0	0	0	0	0	0	0	0	0	0	0	0	0	0	0	0	0	0	0
TCONS_00032287	0	0	0	0	0	0	0	0	0	0	0	0	0	0	0	0	0	0	0	0	0
TCONS_00032288	0	0	0	0	0	0	0	0	0	0	0	0	0	0	0.393149	0	0.525949	0.282048	0.671007	0.429745	0.531393
TCONS_00032401	0.10244	0.297196	0.0727975	0.415936	0	0	0.155788	0	0.154492	0.0907705	0	0.0820383	0	0	0.106843	0	0.104263	0.190598	0.106234	0	0.0150084
TCONS_00032402	0.101359	0.170346	0.163237	0.374351	0.17451	0.0676016	0	0	0.152406	0.18165	0.0794223	0	0	0.0556449	0	0.0163211	0	0.0264922	0.0560817	0.0813939	0.0758366
TCONS_00032403	0	0	0	0	0.212671	0.109514	0.338556	0	0.126767	0	0.127424	0	0	0.0664159	0	0.170209	0	0	0	0.020611	0
TCONS_00032451	0	0	0	0	0	0	0	0	0	0	0	0	0	0	0	0	0	0	0	0	0
TCONS_00032453	0	0	0	0	0	0	0	0	0	0	0	0	0	0	0	0	0	0	0	0	0
TCONS_00032455	0	0	0	0	0	0	0	0	0	0	0	0	0	0	0	0	0	0	0	0	0
TCONS_00032482	0	0	0	0	0	0	0	0	0	0	0	0	0	0.302131	0.0804541	0.067293	0.461867	0.463883	0.339749	0.490609	0.20947
TCONS_00032483	0	0	0	0	0	0	0	0	0	0	0	0	0.216609	0	0	0	0.135164	0	0	0	0
TCONS_00032484	0	0	0	0	0	0	0	0	0	0	0	0	0	0	0	0	0.248358	0	0	0	0
TCONS_00032505	0	0	0	0.0609704	0.0598438	0.0831871	0	0	0	0	0	0	10.4207	4.10452	8.1822	13.8703	6.15854	9.54674	27.7183	0	5.81904
TCONS_00032506	0	0	0.0836508	0	0	0	0	0.0275835	0	0.131825	0	0	0	0	0	0	0	0	0	0	0
TCONS_00032512	0	0	0	0	0	0	0	0	0	0	0	0	57.3295	85.2862	0	74.7189	0	70.2913	89.9024	106.994	68.675
TCONS_00032515	0	0	0	0	0	0	0	0	0	0	0	0	0	0	0	0	0	0	0	0	0
TCONS_00032527	0	0.0364443	0.0339824	0.109494	0	0.0745668	0	0.0359054	0	0	0	0	0.149505	0.14172	0.152095	0.109012	0.215877	0.112402	0.190966	0.34241	0.639054
TCONS_00032628	0.0430483	0	0	0.032617	0.00778272	0.0249931	0	0	0.0221148	0	0.0614476	0.00759789	0	0	0	0.463911	0	0	0	0	0
TCONS_00032629	0	0	0	0	0	0	0	0	0	0	0	0	0	0	0	0	0	0	0	0	0
TCONS_00032630	0	0	0	0	0	0	0	0	0	0	0	0	0	0.208267	0	0	0	0	0	0	0
TCONS_00032633	0	0	0	0	0.0100114	0	0	0	0	0	0	0	0	0.165905	0.141924	0	0	0	0	0	0.501601
TCONS_00032634	0	0	0	0	0	0	0	0	0	0	0	0	0	0	0	0	0	0	0	0	0
TCONS_00032690	0.17894	0	0	0	0.269792	0.125393	0	0.142412	0	0	0.0854025	0	0	0	0	0	0	0	0	0	0
TCONS_00032704	0	0	0	0	0	0	0	0	0	0	0	0	0	0	0	0	0	0	0	0	0
TCONS_00032739	0	0	0	0	0	0	0	0	0	0	0	0	0	0	0	0	0	0	0	0	0
TCONS_00032740	0	0	0	0	0	0	0	0	0	0	0	0	0	0	0	0	0	0	0	0	0
TCONS_00032741	0	0	0	0	0	0	0	0	0	0	0	0	0	0	0	0	0	0	0	0	0
TCONS_00032945	0	0	0	0	0	0	0	0	0	0	0	0.103064	0	0	0.210645	0.0454161	0.270562	0.272378	0.584567	0.537764	0.552084
TCONS_00032971	1.0813	0.36389	0.983737	0.633872	0.584589	0	0	0.830729	0	1.68514	0	2.10522	2.39358	2.46622	1.56764	2.11409	0.827432	1.98454	2.07681	0.955464	1.9387
TCONS_00032999	0	0	0	0	0	0	0	0	0	0	0	0	0	0	0.166307	0	0	0.0955782	0	0.832461	0.0532447
TCONS_00033000	0	0	0	0	0	0	0	0	0	0	0	0	0.0514594	0	0.637618	0	0.211874	0	0	1.07861	0.0894069
TCONS_00033002	0	0	0	0	0	0	0	0	0	0	0	0	0.236848	0	0	0.0542112	0	0	0.345782	0	0.192602
TCONS_00033028	0.035169	0.422108	0	0.384971	0.224909	0.0782345	0.0353989	0.0718995	0.0707683	0	0	0	0	0	0	0	0	0	0	0	0
TCONS_00033056	0	0.797086	0.0657052	0.142115	0	0	0.118506	0	0	0	0.129358	0	0	0.185726	0	0.0710107	0	0	0	0	0
TCONS_00033113	0	0	0	0	0	0	0	0	0	0.0322393	0.0268348	0	0	0.182928	0	0	0	0	0	0.150166	0
TCONS_00033182	0.406874	0.686098	0.145124	0.25611	0.386564	0.26081	0.460848	0.0963652	0.182815	0.111505	0.275826	0	0.0493609	0.0935712	0.0501273	0.0467769	0.0908276	0.0479547	0.047656	0.14375	0
TCONS_00033270	0	0	0	0	0	0	0	0	0	0	0	0	0	0	0	0	0	0	0	0	0
TCONS_00033284	0	0	0	0	0	0	0	0	0	0	0	0	0	0	0	0	0	0	0	0	0
TCONS_00033345	0	0	0	0	0	0	0	0	0	0	0	0	0	0	0	0	0	0	0	0	0
TCONS_00033370	0	0	0	0.0194212	0	0.00986606	0	0.0554481	0	0	0	0.0468468	0	0	0	0.0729951	0.0394548	0	0	0.243339	0
TCONS_00033380	0	0	0	0	0	0	0	0	0	0	0	0	0	0.137576	0.35471	0.494666	0.149422	0.177025	0.437535	0.324181	0.337836
TCONS_00033425	0	0	0	0	0	0	0	0	0	0	0	0	0	0	0	0.790929	0	0	0.964507	0	0
TCONS_00033439	0	0	0.779618	0	0	0	0	0	0	0	0	0	0	0	0	0	0	0	0	0	0
TCONS_00033469	0.0593141	0.0906379	0.244822	0	0	0.0306972	0	0	0	0	0	0	0	0	0.592223	0	0	0	0	0	0
TCONS_00033491	0	0.0517546	0	0	0	0.00773227	0	0	0	0	0	0	0	0	0	0.0306415	0	0	0.00959515	0	0.0954207
TCONS_00033492	0	0.0146771	0	0	0.0131009	0	0.0124489	0.00415084	0.0162683	0.0203662	0.0212151	0.110982	0.138464	0.218533	0.0347472	0.0445305	0.0754357	0.190261	0.0457397	0.0489329	0.0882678
TCONS_00033494	0	0	0	0	0	0	0	0	0	0	0	0	0	0	0	0	0	0	1.99793	0	0
TCONS_00033497	0	0.0761677	0	0	0	0	0	0	0.0469116	0	0	0.217263	0	0.0768382	0	0.166774	0.081025	0	0	0	0.0794019
TCONS_00033504	0.0597537	0.0327729	0	0	0.0535918	0.0567363	0	0.0645353	0	0	0.115621	0.345727	0.0654352	0.247221	0.224373	0.240705	0	0.149135	0.267898	0.0855765	0.468434
TCONS_00033517	0	0	0	0	0	0	0	0	0	0	0	0	0	0	0	0	0	0	0	0	0
TCONS_00033527	0	0	0	0	0	0	0	0	0	0	0	0	0	0	0	0	0	0	0.184383	0	0
TCONS_00033528	0	0	0	0	0	0	0	0	0	0	0	0	0	0	0	0	0.189358	0.261358	0	0	0
TCONS_00033529	0	0	0	0	0	0	0	0	0	0	0	0	0.150518	0.334543	0.0388671	0	0	0	0	0.213988	0.18882
TCONS_00033530	0	0	0	0	0	0	0	0	0	0	0	0	0	0	0	0.237872	0.422352	0.406341	0.248257	0	0.193507
TCONS_00033541	0	0	0	0	0	0	0	0	0	0	0	0	0	0	0	0.166123	0.323139	0.305655	0.153145	1.47215	0
TCONS_00033551	0	0.155367	0.32833	0.0506608	0	0.253691	0	0	0	0	0	0	0	0	0	0	0.0590043	0	0	0	0
TCONS_00033574	0	0.0474823	0	0	0.0230273	0	0	0	0	0	0	0	0	0	0.398015	0	0	0	0	0	0
TCONS_00033588	0	0	0	0	0	0	0	0	0	0	0	0	0	0	0.271376	0	0	0.802667	0.0679398	0	0.212682
TCONS_00033608	0	0	0	0	0	0	0	0	0	0	0	0	0	0	0	0	0.572326	0.04154	0.041849	0.160647	0.0877052
TCONS_00033624	0	0	0	0	0.00489422	0.0168885	0	0	0	0	0.00824667	0	0.144368	0	0.110057	0	0	0.0824811	0.0812545	0	0
TCONS_00033655	0	0	0	0	0	0	0	0	0	0	0	0	0	0	0	0	0	0	0	0	0
TCONS_00033656	0	0	0	0	0	0	0	0	0	0	0	0	0	0	0	0	0	0	0	0	0
TCONS_00033657	0	0	0	0	0	0	0	0	0	0	0	0	0	0	0	0	0	0	0	0	0
TCONS_00033684	0	0	0	0	0	0	0	0	0	0	0	0	0.307216	0.274413	0	0.430937	0.277112	0.176475	0.3451	0.171595	0.548272
TCONS_00033698	0.211464	0.17365	0.377831	0.119759	0.498852	0.0393911	0.0701353	0.301688	0.437524	0.518023	0.516946	0	0.14849	0.0941029	0.122493	0.1561	0	0.133444	0.133339	0	0.216782
TCONS_00033736	0	0	0	0	0	0	0	0	0	0	0	0	0	0	0	0	0	0	0	0	0
TCONS_00033741	0	0	0	0	0	0	0	0	0	0	0	0	0	0	0	0	0	0	0	0	0
TCONS_00033840	0.0223776	0	0	0.0266757	0	0	0	0	0	0	0	0	0	0.0831535	0	0.0319574	0.0658433	0.032132	0.0341078	0	0.301084
TCONS_00033993	0.352602	0	0.0696407	0.181177	0	0.0744001	0.237036	0	0.199129	0	0	0.307353	0.124101	0	0	0.102009	0	0.0688819	0	0	0
TCONS_00034033	0	0	0	0	0	0	0	0	0	0	0	0	0	0	0	0	0	0	0	0	0
TCONS_00034047	0.0172388	0	0	0.0135175	0.0103623	0	0	0	0	0	0	0	0.0829445	0	0	0	0	0	0	0	0.0771936
TCONS_00034048	0	0	0	0	0	0	0	0	0	0	0	0	0	0.169911	0	0	0.0714175	0	0.0995116	0.0928921	0
TCONS_00034049	0.072344	0.0483574	0.039366	0.0162783	0.00714657	0	0.0463273	0.0103452	0.0323199	0	0	0	0	0.163115	0.177499	0.353328	0.0917028	0.194114	0.215893	0.135038	0.0941138
TCONS_00034050	0	0	0	0	0	0	0	0	0	0	0	0	0	0	0	0	0	0	0	0	0
TCONS_00034051	0	0	0	0	0	0	0	0.0224933	0	0	0	0.0376032	0.0849027	0.261361	0	0	0.0747261	0.07359	0.110161	0	0.158468
TCONS_00034052	0	0	0	0.0232291	0	0.0316633	0	0	0	0	0	0	0	0	0	0	0.0565745	0	0	0.0663301	0
TCONS_00034053	0	0	0	0	0	0	0	0	0	0	0.0370172	0.0236305	0	0	0	0	0	0	0	0	0.063664
TCONS_00034054	0	0	0.0268811	0	0	0	0	0	0	0	0	0	0	0	0.214136	0.16798	0.210941	0.0985596	0.103657	0.102562	0
TCONS_00034057	0	0	0	0	0	0	0	0	0	0	0	0	1.24981	0	0	0	0	0	0	1.49257	0
TCONS_00034058	0	0	0	0	0	0	0	0	0	0	0	0	0	0	0	0	0	0	0	0	0
TCONS_00034059	0	0	0	0	0	0	0	0	0	0	0	0	0	0	0	0	0	0	0	0	0
TCONS_00034060	0	0	0	0	0	0	0	0	0	0	0	0	0	0	0	0	0	0	0	0	0
TCONS_00034061	0	0	0	0	0	0	0	0	0	0	0	0	0	0	0	0	0	0	0	0	0
TCONS_00034062	0	0	0	0	0	0	0	0	0	0	0	0	0	0	0	0	3.07844	0	2.21082	1.35584	0
TCONS_00034063	0	0	0	0	0	0	0	0	0	0	0	0	0	0	0	0	0	0	0	0	0
TCONS_00034065	0	0	0	0	0	0	0	0	0	0	0	0	0	0.190022	0	0.222943	0.410394	0	0.639382	0.295346	0.975683
TCONS_00034084	0	0	0	0	0	0.106876	0	0.132376	0	0	0	0	0	0	0	0	0	0	0	0	0
TCONS_00034085	0.541168	1.00619	0	0	0.369961	0.270829	0.526309	0	0.443887	0.738521	0.931193	0	0	0	0	0	0	0	0	0	0
TCONS_00034086	0.610543	0	0	0	0	0	0	0	0	0.753736	0.885948	0	0	0	0	0	0	0	0	0	0
TCONS_00034099	0	0	0	0	0	0	0	0	0	0	0	0	0	0	0	0	0	0	0	0	0
TCONS_00034105	0.0456082	0.108641	0	0.107521	0.14908	0	0	0	0.0924531	0.0379726	0	0.118748	0.0241147	0	0	0	0	0.0364194	0	0	0.040981
TCONS_00034107	0.111788	0.128906	0.160068	0.171972	0.10406	0.169465	0.163225	0.0959446	0.0998895	0.0655404	0.127499	0.0700099	0.055661	0.141825	0	0.073817	0.0468533	0.0797386	0.195175	0.0399423	0.146787
TCONS_00034146	0	0	0	0	0	0	0	0	0	0	0	0	0.652318	0.359987	0	0.463134	0	0.312177	0.788157	0.401797	0.772407
TCONS_00034147	0	0	0	0	0	0.00130197	0.0047857	0	0	0.00576956	0	0	0.318847	0.384758	0.81612	0.228321	1.25075	0.624184	0.465512	0.709344	0.990307
TCONS_00034148	0	0	0	0	0	0	0	0	0	0	0	0	0	0	0	0.122705	0	0	0	0	0
TCONS_00034163	0	0	0	0	0	0	0	0	0	0	0	0	0	0	0.436565	0	0.647636	0.197406	0.301343	0.63833	0.789175
TCONS_00034234	0	0	0	0	0	0	0	0	0	0	0	0	0	0	0	0	0	0	0	0	0
TCONS_00034235	0	0	0	0	0	0	0	0	0	0	0	0	0	0	0	0	0	0	0	0	0
TCONS_00034236	0	0	0	0	0	0	0	0	0	0	0	0	0	0	0	0	0	0	0	0	0
TCONS_00034238	0	0	0	0	0	0	0	0	0	0	0	0	0	0	0	0	0	0	0	0	0
TCONS_00034239	0	0	0	0	0	0	0	0	0	0	0	0	0	0	0	0	0	0	0	0	0
TCONS_00034266	0.00745083	0	0	0	0	0	0.0221339	0.039919	0	0	0	0	0	0.03757	0.02678	0.0249322	0.154228	0	0.105597	0	0.191799
TCONS_00034391	0.0616016	0	0.0671894	0	0	0.077978	0	0.229492	0.120282	0.324261	0.136963	0.290858	0	1.62648	0	0	1.68131	2.1078	2.32252	0	0
TCONS_00034527	0.0107376	0	0.0596955	0	0.0326279	0	0.00849873	0	0.0197056	0	0.0355019	0.061682	0	0	0	0	0	0	0	0	0
TCONS_00034534	0	0	0	0	0	0	0	0	0	0	0	0	0	0	2.20156	0.223226	0	0	1.14229	0	0
TCONS_00034535	0.0503996	0.0612524	0	0	0	0	0	0.150121	0	0	0.026407	0	0.125435	0.380324	0	0.0286354	0	0	0.0743913	0	0
TCONS_00034537	0.0599311	0.0674639	0.0876949	0.0677332	0	0.135232	0.186037	0.220249	0	0	0.0850119	0	0.0427758	0	0.045572	0.0392211	0	0	0.104216	0	0
TCONS_00034539	0	0	0	0	0.0754813	0	0	0	0	0	0	0	0	0	0	0	0	0.367954	0	0	0
TCONS_00034540	0	0	0	0	0	0	0	0	0	0	0	0	0	0	0	0	0	0	0	0	0
TCONS_00034541	0	0	0	0	0	0	0	0	0	0	0	0	0	0	0	0	0.309237	0	0.0230775	0.959038	0
TCONS_00034542	0	0.0513232	0	0	0	0	0	0	0	0.0791116	0	0	0.0499835	0	0	0	0.454798	0	0	2.37516	0
TCONS_00034550	0.745405	0.582622	1.00532	0.508941	0.509902	0.263355	0.284138	0.396131	0.282957	0.313339	0.0676473	0.132216	0.0325148	0.0743842	0.076857	0.114603	0.02587	0.106097	0.0483632	0.0243438	0.0745716
TCONS_00034728	0.523995	0.294507	0.438877	0.201989	0.709611	0.576689	0.534845	0.349281	0.633628	0.468554	0.305492	0.284894	0.475588	0.929533	0.82198	0.963616	0.438422	0.766112	0.502421	0.423983	1.20322
TCONS_00034729	0	0	0.269437	0.386609	0	0	0.25527	0	0	0	0	0.204664	0.298666	0	0	0.370115	0	0	0	0.700564	0
TCONS_00034759	0	0	0	0.0180351	0	0	0	0	0	0	0	0	0.448609	0	0	0	0.488391	0.0879537	0.194288	0	0
TCONS_00034760	0	0	0	0	0	0	0	0	0	0	0	0	0	0	0	0	0	0	0	0	0.142144
TCONS_00034761	0	0	0	0	0	0	0	0	0	0	0	0	0	0	0	0	0	0.0958515	0	0.327714	0
TCONS_00034769	0	0	0	0.0201325	0	0	0	0	0	0	0	0	0	0	0.213537	0	0	0	0.159126	0	0
TCONS_00034772	0	0	0	0	0	0	0	0	0	0	0	0	0	0.166016	0	0	0	0.0195852	0	0.235017	0
TCONS_00034773	0	0	0	0	0	0	0	0	0	0	0	0	0.217081	0.232963	0.228976	0.0258809	0.160747	0.0358446	0.121773	0.241006	0.147488
TCONS_00034774	0	0	0	0	0	0	0	0	0	0	0	0	0.166558	0.085145	0.184991	0.198034	0.463258	0.0251967	0.371847	0.453193	0.476213
TCONS_00034806	0	0	0	0	0	0	0	0	0	0	0	0	0	0	0	0	0	0	0	0	0
TCONS_00034837	0	0	0	0	0	0.028647	0	0	0	0	0	0	0.446517	0.485901	0.228474	0.215047	1.26444	0	0.922916	2.33314	1.77607
TCONS_00035033	0	0	0	0	0	0	0.237761	0	0	0	0	0	0	0	0	0	0	0	0	0	0
TCONS_00035438	0	0	1.19239	1.54639	0	1.08359	1.79723	0	0.761319	0.743332	0	0.599029	0.257546	0	1.002	0	0	0.645605	0	0.402057	0
TCONS_00035497	0	0	0	0	0	0	0	0	0	0	0	0.256212	0	0	0	0	0.0577058	0	0	0	0
TCONS_00035539	0	0	0	0.0751287	0	0	0	0.0281989	0	0	0	0	0	0	0	0	0	0.162372	0	0	0
TCONS_00035540	0.0435907	0	0.093597	0	0	0	0	0	0	0	0	0	0	0	0	0	0	0	0	0.484452	0
TCONS_00035552	0	0	0	0	0	0	0	0	0	0	0	0	0	0	0	0	0	0	0	0	0
TCONS_00035613	0	0	0	0	0.00608418	0.0191883	0	0	0	0.0692179	0	0	0	0	0	0	0.053396	0	0.0852905	0.0751555	0.132773
TCONS_00035689	0	0	0	0	0	0	0	0	0	0	0	0	0	0	0.110236	0	0	0.578609	0	0	0
TCONS_00035696	0	0	0.0134648	0	0	0.0272389	0	0.0268641	0.0482321	0	0	0	0.265002	0.525778	0.453272	1.01521	0.518525	0.761562	1.28832	0.799632	0.426899
TCONS_00035738	0	0	0	0	0	0	0	0	0	0	0	0	0	0	0	0	0	0	0	0	0
TCONS_00035756	0	0	0.0454651	0	0	0	0	0	0	0	0	0	0.164661	0	0.137689	0.0911146	0	0.0798023	0	0	0.395961
TCONS_00035761	0	0	0	0	0	0	0	0	0	0	0	0	0.0190252	0.314706	0.146601	0	0	0	0.16516	0	0.145554
TCONS_00035762	0	0	0	0	0	0.200065	0	0.187547	0	0	0	0	0	0	0	0.0788457	0	0	0	0	0.710818
TCONS_00035803	0	0	0.00546271	0	0	0	0	0	0	0	0	0	0.454501	0.501836	0.93257	0.692358	0	0.470909	0.632591	0.740382	0
TCONS_00035804	0	0	0	0	0	0	0	0	0	0	0	0	0	0	0	0	4.85627	0	0	0	0
TCONS_00035805	0	0	0	0	0	0	0	0	0	0	0	0	0	0	0	0	0	0	0	0	0
TCONS_00035840	0	0	0	0	0	0	0	0	0	0	0	0	0.606368	0	0	0.262773	0	0	0.368632	0	0.7961
TCONS_00035841	0	0	0	0	0	0	0	0	0	0	0	0	0	0	0	0	0	0	0.569212	0	0
TCONS_00035857	0	0	0	0	0	0	0	0	0	0	0	0	0	0	0.0112697	0.0537859	0.0489232	0.135066	0	0.0444969	0.0622791
TCONS_00035894	0	0	0	0	0	0	0	0	0	0	0	0	0	0	0	0	0	0	0	0	0
TCONS_00035916	0	0	0	0	0	0	0	0	0	0	0	0	0	0	0	0	0	0	0	0	0
TCONS_00035917	0	0	0	0	0	0	0	0	0	0	0	0.15363	0	0	0	0	0	0	0	0	0
TCONS_00035918	0	0	0	0	0	0	0	0	0	0	0	0	0	0	0	0	7.55016	0	0	0	0
TCONS_00035919	0	0	0	0	0	0	0	0	0	0	0.251866	0	0	0	0	0	0	0	0	0	0
TCONS_00035922	0	0	0	0	0	0	0	0	0	0	0	0	0	0	0	0	0	0	0	0	0
TCONS_00035923	0	0	0	0	0	0	0	0	0	0	0	0	0	0	0	0	0	0	0	2.64985	0
TCONS_00035924	0	0	0	0	0	0	0	0	0	0	0	0	0	0	0	0	0	0	0	0	0
TCONS_00035925	0.0601136	0	0.0553907	0	0	0.045398	0.0494377	0	0.04776	0.04831	0.0277232	0.109124	1.0376	1.07679	0.987113	1.41939	1.13363	0.736207	0	0.555716	0
TCONS_00035937	0	0	0	0	0	0	0	0	0	1.1036	0	0	0	0	0	0	0	0	0	0	0
TCONS_00035963	0	0	0.409154	0	0.286673	0	0	0.1828	0	0.239159	0	0	0	0	0	0	0	0	0	0	0
TCONS_00035985	0	0.11562	0	0	0	0.0459873	0	0	0	0	0.0344237	0	0	0	0	0	0.371578	0	0	0.491117	0.29404
TCONS_00035986	0	0	0	0	0	0	0	0	0.22099	0	0	0	0	0	0.935289	0	0	0	0	0	0
TCONS_00036068	0	0	0	0	0	0	0	0	0	0	0	0	0	0	0	0	0	0	0	0	0
TCONS_00036069	0	0	0	0	0	0	0	0	0	0	0	0	0	0	0	0	0.246205	0	0	0.217003	0.308091
TCONS_00036071	0	0	0	0	0	0	0	0	0	0	0	0	0.167361	0.247381	0.42498	0.127491	0.459287	0.387348	0.708403	0.393271	0.648832
TCONS_00036072	0.0169404	0	0.0187984	0	0.00482955	0	0	0	0	0	0	0	0	0.123321	0	0	0	0	0	0.410076	0
TCONS_00036135	0	0	0	0	0	0	0	0	0	0	0	0	0	0	0	0	0	0	0	0	0
TCONS_00036136	0	0	0	0	0	0	0	0	0	0	0	0.87953	0	0.656618	0.922932	0	0	0	0	0	0
TCONS_00036137	0	0	0	0	1.27406	0	0	0	0	0	0	0	0	0	0	0	0	0	0.396627	0.499215	0
TCONS_00036162	0	0	0	0	0	0	0	0	0	0	0	0	0	0	0	0	0	0	0	0	0
TCONS_00036163	0	0	0	0	0	0	0	0	0	0	0	0	0.0895037	0	0	0	0.149191	0	0	0	0
TCONS_00036164	0	0	0	0	0	0	0	0	0	0	0	0	0	0	0	0.12544	0	0.172549	0.243984	0	0.230557
TCONS_00036165	0	0	0	0	0	0	0	0	0	0	0	0	0	0	0	0	0	0	0	0	0
TCONS_00036166	0	0	0	0	0	0	0	0	0	0	0	0	0	0.221226	0	0.0489131	0.23259	0.193867	0.314851	0.269317	0.428417
TCONS_00036167	0	0	0	0	0	0	0	0	0	0	0	0	0	0	0	0	0	0	0	0	0
TCONS_00036170	0	0	0.00230044	0	0	0	0	0	0	0	0	0	0	0	0	0	0	0	0	0	0
TCONS_00036230	0	0	0	0	0	0	0	0	0	2.55416	3.07213	0	2.79709	2.40663	3.31236	5.07899	1.4782	3.19942	1.86488	1.32205	2.90145
TCONS_00036271	0	0	0	0	0	0	0	0	0	0	0	0	0	0	0	0	0	0	0	0	0
TCONS_00036383	0	0	0	0	0	0	0	0	0	0	0	0	0	0	0	0	0	0	0	0	0
TCONS_00036384	0	0	0	0	0	0	0	0	0	0	0	0	0	0	0	0	0.424515	0.592475	0.729191	0	0
TCONS_00036385	0	0	0	0	0	0	0	0	0	0	0	0	0	0.894559	2.31943	0	3.79863	1.67266	2.46174	3.65842	0
TCONS_00036415	0.527214	0.581352	0.924952	0	0.30788	0.619171	0.345347	0	0	0.832023	0	0.532571	0	0.0956573	0.0678418	0.265183	0	0.041056	0	0.0285436	0.32028
TCONS_00036444	0	0.441268	0.800863	0	0.371011	0.558193	0.393094	0.698042	0.154839	0.860118	0	0	0	0.179243	0	0.15892	0	0.22849	0.0406133	0.0545075	0
TCONS_00036537	0	0.348397	0	0.607411	0.0536249	0.309058	0.119682	0.502759	0.221685	0.43122	0.233285	0.257588	0.110984	0	0.446319	0.264868	0.155858	0.367656	0.301231	0.281464	0.362514
TCONS_00036637	0	0	0	0	0	0	0	0	0	0	0	0	0	0	0	0	0	0	0	0	0
TCONS_00036652	0	0	0	0	0	0	0	0	0	0	0	0	0	0	0.170139	0	0	0	0	0	0
TCONS_00036657	0	0	0	0	0.0956485	0	0	0	0	0	0	0	0.0911214	0.175253	0.343389	0.0842579	0	0.39269	0.204941	0	0.815611
TCONS_00036682	0	0	0	0	0	0	0	0	0	0	0	0	0.125736	0	0	0	0	0	0	0	0
TCONS_00036684	0	0	0	0	0	0	0	0	0	0	0	0	0	0	0	0	0	0	0	0	0.0794657
TCONS_00036694	0.0475123	0.059514	0.0669357	0	0	0.0540488	0.069	0.142999	0	0.160405	0.174368	0.163772	0.125293	0.1626	0	0.0765639	0.0429155	0	0	0.0135356	0.114852
TCONS_00036709	0.242317	0	0	0.23395	0	0	0.363211	0	0	0	0	0	0.233174	0	0	0	0	0	0.0998098	0	0.277626
TCONS_00036723	0	0	0	0	0	0	0	0	0	0	0	0	0	0	0	0	0	0	0	0	0
TCONS_00036752	0	0.180283	0.0908116	0.0463563	0	0	0.124417	0.219972	0.452296	0	0	0	0	0	0	0	0.0385491	0	0	0	0
TCONS_00036898	0	0	0	0	0	0	0	0	0	0	0	0	0	0	0	0	0	0	0	0.46666	0.245726
TCONS_00036899	0	0	0	0	0	0	0	0	0	0	0	0	0	0	0	0	0	0	0.210255	0.285119	1.07079
TCONS_00036901	0	0	0	0	0	0	0	0	0	0	0	0	0.998565	1.67756	2.25871	0.439708	1.14188	1.02243	1.80314	1.81212	2.13389
TCONS_00036939	0	0	0	0	0	0	0	0	0	0	0	0	0	0	0	0	0	0	0	0	0
TCONS_00036996	0.72434	0.531744	0	0	0.515597	0.801742	0	0.115119	0.320212	0.525096	0.747391	0.510927	0	0.374907	0.432209	0.549995	0.031254	0.379622	0.245953	0.204016	0.40634
TCONS_00037058	0	0	0	0	0	0	0	0	0	0	0	0	0	0	0	0	0	0	0	0	0
TCONS_00037073	0	0	0	0	0	0	0	0	0	0	0	0	0.299075	0	0	0	0	0	0.410179	0	0
TCONS_00037074	0	0	0	0	0	0	0	0	0	0	0	0.18326	0	0.641791	0	0	0.95397	0	0	0.870571	0.441331
TCONS_00037202	0	0	0	0	0	0	0	0	0	0	0	0	0	0	0	0	0	0	0	0	0
TCONS_00037203	0	0	0	0	0	0	0	0	0	0	0	0	0	0	0	0	0	0	0	0	0
TCONS_00037223	0	0.181686	0	0.255569	0	0	0.145753	0	0.121667	0.624149	0	0	0	0.424681	0	0	0	0	0	0.223002	0
TCONS_00037369	0	0	0	0	0	0	0	0	0	0	0	0	0	0	0	0	0	0	0	0	0
TCONS_00037370	0	0	0	0	0	0	0	0	0	0	0	0	0	0	0	0	0	0	0	0	0
TCONS_00037371	0	0	0	0	0	0	0	0	0	0	0	0	0	0	0	0	0	0	0	0	0
TCONS_00037375	0	0	0	0	0	0	0	0	0	0	0	0	0	0	0	0	0	0	0	0	0
TCONS_00037482	0	0	0	0.0504221	0	0	0	0	0	0	0	0	0	1.17819	1.2179	0	0	0	0	0	0
TCONS_00037525	0	0	0	0	0	0.130401	0	0	0.0374456	0.125536	0	0	0	0	0	0	0.0833441	0	0	0	0.0274143
TCONS_00037556	0	0	0	0	0	0	0	0	0	0	0	0	0	0	0	0	0	0	0	0	0
TCONS_00037562	0	0	0	0	0	0	0	0	0	0	0	0	0.213445	0	0.0898801	0	0.125013	0.025662	0.012666	0	0.470038
TCONS_00037564	0	0.01175	0.0112725	0.0117456	0	0.024121	0	0	0	0	0	0	0.124926	0	0.0407853	0	0	0.0525354	0	0.256509	0.156901
TCONS_00037565	0	0	0	0	0	0	0	0	0	0	0	0	0.243719	0	0.0120115	0	0.154382	0	0	0	0
TCONS_00037566	0	0	0	0	0	0	0	0	0	0	0	0	0.0731546	0	0	0	0.0937621	0	0	0.27789	0
TCONS_00037689	0	0	0	0	0	0	0	0	1.81131	1.73704	0.957652	0.607676	0	0	0	0	0	0	0.296316	0	0
TCONS_00037696	0	0	0	0	0	0	0	0	0	0	0	0	0	0	0.218983	0	0	0	0	0	0
TCONS_00037697	0	0	0	0	0.0530687	0.0188052	0.0342128	0	0	0	0	0	0	0.0807491	0	0	0	0	0	0.204021	0.0825017
TCONS_00037698	0	0	0	0	0	0	0	0	0	0	0	0	0.0785694	0.232155	0	0.0706813	0.0565196	0.0841642	0.223976	0	0
TCONS_00037701	0	0	0	0	0	0	0	0	0	0	0	0	0	0	0	0	0.84522	0.275939	1.03783	0	0
TCONS_00037708	0	0	0.165464	0	0	0	0	0	0	0	0	0	0.20855	0	0.238814	0.143467	0	0	0.0812986	0.0510939	0
TCONS_00037709	0	0	0	0	0	0	0	0	0	0	0.373288	0	0	0	0	0	0	0	0	0	0
TCONS_00037710	0	0	0	0	0	0	0	0	0	0	0	0	0	0	0	0	0	0	0	0	0
TCONS_00037711	0	0	0	0	0	0	0	0	0	0.211813	0	0	0	0.16635	0	0	0.0632215	0	0	0	0
TCONS_00037731	0	0	0	0	0	0	0	0	0	0	0	0	0.0971665	0	0	0	0.181718	0.185903	0.0922003	0.633925	0.654295
TCONS_00037765	0.0967456	0	0.0705208	0	0	0	0	0.102861	0	0	0	0	0.210011	0.169019	0.288367	0.0349068	0.752077	0.175549	0.596995	1.0585	0.540988
TCONS_00037963	0	0	0	0	0	0	0	0	0	0	0	0	0	0	0	0	0	0	0	0	0
TCONS_00037964	0.00645777	0.150001	0.0847427	0.308478	0	0.0752739	0.0871318	0.209856	0.777539	0.0663552	0.0137031	0.00694481	0.0216673	0	0.082098	0.0404792	0.0265203	0	0.00687634	0	0.00706597
TCONS_00038091	0	0.078797	0.0480164	0.0685411	0.0369334	0.0883058	0.0146317	0	0.0852528	0	0.0394557	0	0.172986	0.0313215	0.0864351	0.0487604	0	0.00867351	0	0	0
TCONS_00038093	0	0	0	0	0.818889	0	0	0	0	0	0	0.167722	0	0.283891	0.143575	0	0	0	0	0	0
TCONS_00038094	0.34768	0.143669	0	0.315423	0	0	0	0	0.661223	0	0.0611406	0	0	0	0	0	0.132452	0.0798492	0	0.0523234	0
TCONS_00038120	0	0	0	0	0	0	0.0255313	0	0	0	0	0	0	0	0	0	0	0	0	0	0
TCONS_00038121	0	0	0	0	0	0	0	0	0	0	0	0	0	0	0	0	0	0	0	0	0
TCONS_00038122	0	0	0	0	0	0	0	0	0	0	0	0	0	0	0	0	0	1.24776	3.81851	0	0
TCONS_00038123	0	0	0	0	0	0	0	0	0	0	0	0	0	0	0.383452	0.445125	0.580388	0	1.03333	0	0
TCONS_00038124	0	0	0	0	0	0	0	0	0	0	0	0	0	0	0	0	0.472714	0	0	0	0
TCONS_00038125	0	0	0	0	0	0	0	0	0	0	0	0	0	0	1.42927	0	3.21149	0	0	0	0
TCONS_00038126	0	0.0113347	0	0	0	0.0116862	0	0	0	0	0	0	0.147514	0.0834419	0.0592389	0.11129	0.229084	0	0.549718	0.540546	0.454991
TCONS_00038136	0	0	0	0	0	0	0	0	0	0	0	0	0	0	0	0	0	0	0	0	0
TCONS_00038187	0	0	0	0	0	0	0	0	0	0	0	0	0	1.87942	0.981125	0	0.295731	1.4963	1.78597	1.72547	4.52823
TCONS_00038193	0	0	0	0	0	0	0	0	0	0	0	0	0	0	0	0	0	0	0	0	0
TCONS_00038232	0	0	0	0	0	0	0	0	0	0	0	0	0	0	0	0	0	0	0	0	0
TCONS_00038244	0	0	0	0	0	0.0117375	0	0	0.00417068	0	0	0	0.159611	0.277425	0.0743358	0.260784	0.0839733	0	0.322473	0.147126	0.263625
TCONS_00038257	0.0633087	0	0	0.0240257	0	0	0	0	0	0	0	0	0.0854684	0	0.0468638	0.0596406	0	0.226437	0.0374709	0.0369397	0.332381
TCONS_00038342	0	0	0.0275137	0.0848388	0	0	0	0	0	0	0	0	0.380432	0.183525	0.219841	0.18074	0.683487	0.0446663	0.349854	1.15053	0.574399
TCONS_00038579	0	0	0	0	0.0387631	0	0	0	0	0	0	0	0	0	0	0	0.498345	0	0.338071	0.411362	0
TCONS_00038580	0	0	0	0	0	0.145104	0	0	0	0	0	0	0	0	0	0	0.462244	0	0	0	0
TCONS_00038586	0.0285831	0	0	0	0	0	0	0	0	0	0	0	0.241435	0	0.125119	0	0	0	0.057179	0	0.615186
TCONS_00038587	0	0.0596377	0	0	0	0	0	0.0283041	0	0	0.0153627	0	0	0	0.0546254	0.023469	0.251176	0	0.202544	0.35709	0.566381
TCONS_00038588	0	0	0	0	0.0198311	0	0	0	0	0	0	0	0	0.355097	0	0	0.255107	0.16345	0	0.119652	0
TCONS_00038589	0	0	0	0	0	0	0	0	0	0	0	0	0	0	0	0	0.369678	0	0	0	0
TCONS_00038617	0	0	0	0	0	0	0	0	0	0	0	0	0	0	0	0	0	0	0	0	0
TCONS_00038618	0	0	0	0	0	0	0	0	0	0	0	0	0	0	0	0	0	0	0	0	0
TCONS_00038620	0	0	0	0	0	0	0	0	0	0	0	0	0	0	0	0	0	0	0	0	0
TCONS_00038703	0	0.169301	0.152478	0	0.0950545	0.114328	0	0.189812	0	0.0222345	0.0613569	0.265513	0	0.0128473	0	0.0124605	0	0.0252794	0.0319309	0	0
TCONS_00038707	0	0	0	0	0	0.37911	0	0	0	0	0	0	0	0.116493	0	0	0.0655208	0.0877282	0	0	0
TCONS_00038708	0	0	0	0	0	0	0	0	0	0	0	0	0	0	0	0	0	0	0	0	0
TCONS_00038832	0	0	0	0	0	0	0	0	0	0	0	0	1.78389	0.599374	0.872275	0	2.3219	1.07991	1.16721	2.70065	0.820443
TCONS_00038842	0	0	0	0	0	0	0.0663869	0	0	0	0	0	0	0.831787	0.724008	0.255113	0	0.539587	0.787111	0	0.286586
TCONS_00038870	0	0	0	0	0	0	0	0	0.0516598	0	0	0	0	0	0	0	0	0.134699	0	0	0
TCONS_00038872	0	0	0	0	0	0	0	0	0	0	0	0	0.137025	0.191815	0	0.106624	0.102864	0.0878029	0.364344	0.329137	0.295213
TCONS_00038907	0	0	0	0	0	0	0	0	0	0	0	0	0	0	0	0	0	0	0	0	0
TCONS_00038910	0	0	0	0	0	0	0	0	0	0	0	0	0	0	0	0	0	0	0	0	0
TCONS_00038912	0	0	0	0	0	0	0	0	0	0	0	0	0	0	3.35639	0	0	0	3.09366	0	1.70148
TCONS_00038914	0	0	0	0	0	0	0	0	0	0	0	0	2.14478	1.88406	0	1.86287	2.82227	2.20851	0	2.06254	1.65061
TCONS_00038954	0	0	0	0	0	0	0	0	0	0	0	0	0	0	0	0	0	0	0	0	0
TCONS_00038955	0	0	0	0	0	0	0	0	0	0	0	0	0	0	0	0	0	0	0	0	0
TCONS_00038957	0	0	0	0	0	0	0	0	0	0	0	0	0	0	0	0	0	0	0	0	0
TCONS_00038974	0	0	0	0	0	0	0	0	0	0	0	0	0	0	0	0	0	0	0	0	0
TCONS_00038977	0	0	0	0	0	0	0	0	0	0	0	0	0	0	0	0	0	0	0	0	0
TCONS_00038981	0	0.0960323	0	0	0	0.0393273	0	0	0	0	0	0	0.0355738	0	0.152321	0	0.0158165	0	0.0469801	0.248007	0
TCONS_00038986	0	0.0580545	0.0342183	0.0141441	0	0.058727	0	0	0.0598061	0	0.0135392	0.0268349	0	0	0.0227401	0.0972251	0.129532	0.0646532	0.029368	0.134323	0
TCONS_00038990	1.24382	0	0.800215	3.49158	0	1.32272	0	3.33033	0	0	11.6173	0	0	0	0	1.62936	0	0.707326	0	0	2.07966
TCONS_00039013	0	0	0.0277475	0	0	0.0571671	0	0	0	0	0	0.0550322	0	0	0	0	0	0	0	0	0
TCONS_00039014	0	0	0	0.0159271	0	0	0	0	0	0	0	0	0	0	0	0	0	0	0	0	0
TCONS_00039018	0	0	0	0	0	0	0	0	0	0	0	0	0.0929317	0.10279	0.388298	0.0528491	0.235877	0	0.302064	0.327641	0
TCONS_00039019	0	0	0	0.0732104	0	0	0	0	0	0	0	0	0.158093	0.133995	0.355435	0	0.673299	0.236301	0	0	0
TCONS_00039075	0	0	0	0.00473016	0	0	0.00421877	0.0044273	0	0	0.0120108	0	0	0	0	0	0	0.458731	0	0	0
TCONS_00039076	0	0	0	0	0	0.00948701	0	0	0	0.305784	0	0	0	0	0	0	0	0.805984	0	0	0.0784983
TCONS_00039077	0	0	0.0326241	0.00697982	0.0251838	0.00967752	0.00660692	0.00909787	0	0	0	0	0	0	0.243224	0	0	0	0.10777	0	0
TCONS_00039078	0	0	0	0	0.00437642	0	0	0	0	0	0	0	0	0	0	0	0	0	0	0	0
TCONS_00039079	0	0	0	0	0	0	0	0	0	0	0	0	0	0.242759	0	0	0	0	0	0.393518	0
TCONS_00039080	0	0	0	0	0	0	0	0	0	0	0	0	0.127185	0	0	1.26693	0.0951143	0.548366	0	0	0.109307
TCONS_00039104	0	0	0	0	0	0	0	0	0	0	0	0	0	0	0	0	0	0	0	0	0
TCONS_00039105	0	0	0	0	0	0	0	0	0	0	0	0	0	0	0	0	0	0	0	0	0
TCONS_00039206	0	0	0	0	0	0	0	0	0	0	0	0	0	0	0.218271	0	0	0	0	0	0
TCONS_00039208	0	0	0	0	0	0	0	0	0.101028	0	0	0	0	0.208267	0	0	0	0	0.316828	0	0
TCONS_00039263	0	0	0	0	0	0	0	0	0	0	0	0	0	0	0	0	0	0	0	0	0
TCONS_00039304	0	0	0	0	0	0	0	0	0	0	0	0	0	0	0	0	0	0	0	0	0
TCONS_00039325	0	0	0.235843	0	0	0	0	0	0	0	0	1.14458	0	0	0	0	0	0	0	0	0
TCONS_00039342	0	0	0	0	0	0	0	0	0	1.47166	0	0	0	0	0	0	0	0	0	0	0
TCONS_00039345	0	0	0.0830529	0	0.040161	0	0	0	0	0	0	0	0.596513	0	0	0.104557	0	0	0.103016	0	0.0682478
TCONS_00039445	0	0.0294372	0.0899783	0.0450076	0	0	0.0271335	0.0866191	0	0	0.0922832	0.134029	0	0.146595	0	0	0.021812	0	0	0	0
TCONS_00039502	0	0	0	0	0	0	0.1527	0	0	0	0	0	0	1.82703	0.172214	0	0	0	0	0	0
TCONS_00039580	0	0	0	0	0	0	0	0	0.00514473	0	0	0	0	0	0	0	0	0	0	0	0
TCONS_00039664	0	0	0	0	0	0	0	0	0	0	0	0	0	0	0	0	0	0	0	0	0
TCONS_00039687	0	0	0	0	0	0	0	0	0	0	0	0	0	0	0	0	0	0	0	0	0
TCONS_00039688	0	0	0	0	0	0	0	0	0	0	0	0	0	0	0	0	0	0	0	0	0
TCONS_00039689	0	0	0	0	0	0	0	0	0	0	0	0	0	0	0	0	0	0	0	0	0
TCONS_00039697	0	0	0.0119965	0	0	0	0.0349519	0	0	0.0047626	0	0	0.0466798	0	0.0905358	0.0699522	0	0	0	0.101158	0.181076
TCONS_00039698	0	0	0	0	0	0	0	0	0	0	0	0	0	0.0703754	0	0.0385858	0	0	0.104868	0	0.11515
TCONS_00039890	0	0	0	0	0	0	0	0	0	0	0	0	0	0	0	0	0	0	0	0	0
TCONS_00039961	0	0	0	0	0	0	0	0	0	0	0	0	0	0	0	0	0	0	0	0	0
TCONS_00040028	0	0.0648944	0	0	0.035926	0.0485692	0	0.0702487	0.176342	0	0	0	0.0485387	0.185247	0.209006	0.0914823	0	0.145114	0.144815	0	0.366481
TCONS_00040029	0	0	0	0	0	0	0	0	0	0.151775	0	0	0	0	0	0	0	0	0	0	0
TCONS_00040030	0.399193	0.217162	0.234049	0	0.202139	0	0.219282	0	0	0	0.240312	0	0.16072	0.126681	0.0689042	0	0	0.0709136	0	0	0.252874
TCONS_00040042	0	0	0.0167941	0	0	0	0	0	0	0	0	0	0.10173	0.184501	0	0	0	0	0.0587469	0.167316	0
TCONS_00040049	0	0	0.624375	0	0	0	1.90378	1.71795	0	0	0	0	0	0	0	0	0	0	0	0	0
TCONS_00040069	0	0	0	0	0	0	0	0	0	0	0	0	1.04337	0	0	0	0	0	0	1.37513	0
TCONS_00040078	0	0	0	0	0	0	0	0	0	0	0	0	3.72941	0	0	0	0	0	0	0	0
TCONS_00040089	0.0737125	0.23853	0.105269	0.0865916	0.18069	0.213351	0.151107	0.158408	0.00871773	0.274641	0.13616	0.372797	0	0.168453	0.107948	0.0903841	0	0.0477937	0.0562177	0.0919383	0.075968
TCONS_00040145	0.0114801	0.0130662	0.0375194	0.0392048	0.0897254	0.0271262	0	0.0124271	0.107837	0.014547	0	0	0	0.20709	0.242741	0	0.492786	0	0	0	0.402668
TCONS_00040146	0	0	0	0	0	0	0	0	0	0	0	0	0.278873	0.278065	0.160054	0.728847	0.646017	0.592249	1.02366	0.621971	0.706866
TCONS_00040167	0	0	0	0	0	0	0	0	0	0	0	0	0	0	0	0	0	0	0	0	0
TCONS_00040190	0	0	0	0	0	0	0	0.0278398	0	0	0	0	0	0	0	0	0	0	0	0	0
TCONS_00040191	0	0	0	0	0	0	0	0.0208962	0	0	0	0	0	0	0	0.0350168	0	0.0244067	0.0981584	0	0
TCONS_00040208	0	0	0	0	0	0	0	0	0	0	0	0	0.068646	0	0	0	0	0.819692	0	0	0.680783
TCONS_00040265	0	0	0	0	0	0	0	0	0	0	0	0	0	0	0.122752	0	0	0.0380135	0	0	0.24157
TCONS_00040281	0	0	0	0	0	0	0	0	0	0	0	0	0	0	0	0	0	0.109633	0	0	0
TCONS_00040282	0	0	0	0	0	0	0	0	0	0	0	0	0	0.212044	0	0	0.211988	0	0	0.253179	0.578517
TCONS_00040311	0	0	0.0128345	0	0	0	0	0	0	0	0.0133288	0.0106993	0	0.077104	0.164991	0	0	0	0	0	0
TCONS_00040326	0	0	0	0	0	0	0	0	0	0	0	0	0	0	0	0	0	0	0	0	0
TCONS_00040327	0	0	0	0	0	0	0	0	0	0	0	0	0	0	0	0	0	0	0	0	0
TCONS_00040333	0	0	0	0	0	0	0	0	0	0	0	0	0.157118	0.079497	0.550073	0.0749578	0	0	0.0770267	0.0380486	0.0379984
TCONS_00040360	0	0	0.00765514	0	0	0	0	0	0	0	0	0	0.0365917	0.0539672	0	0.0290661	0.199182	0	0	0	0
TCONS_00040365	0	0	0	0	0	0	0	0	0	0	0	0	0	0	0	0	0	3.52786	18.338	1.64563	0
TCONS_00040374	0.00591582	0	0.0167954	0	0.0170183	0.0035795	0.00653544	0.00979825	0	0	0	0	0.0179581	0.0395505	0.0411308	0.0208622	0.165947	0	0.278093	0.081114	0.208124
TCONS_00040382	0	0	0	0	0.0112713	0	0	0	0	0	0.00563089	0.0055104	0.237121	0.177195	0.0509201	0	0.111017	0.0399965	0.193482	0.395697	0.212458
TCONS_00040401	0.0738918	0.12163	0.0660145	0	0	0	0.0743493	0.0919437	0.0505418	0	0	0.0604093	0	0	0.106021	0.0726662	0.0589862	0.0249719	0	0	0.0929328
TCONS_00040433	0	0	0	0	0	0	0	0	0	0	0	0.0232322	0	0	0.0898577	0	0	0.374716	0	0.32693	0
TCONS_00040434	0	0	0	0	0	0	0	0	0	0	0	0	0.135497	0.314431	0	0.268039	0.141258	0.0997769	0.357036	0.135946	0.389511
TCONS_00040435	0.00683932	0.00764145	0	0	0.0156345	0	0.00197765	0.015003	0	0.00634677	0	0	0	0	0	0	0	0	0	0	0
TCONS_00040437	0	0	0	0	0	0	0	0	0	0	0	0	0	0	0	0	0.265405	0	0	0.107789	0
TCONS_00040438	0	0.00804692	0	0	0	0	0.00187135	0	0	0.00258495	0	0	0	0	0.0955512	0	0	0	0	0	0
TCONS_00040460	0	0.211107	0.148615	0	0.0362833	0	0	0	0	0	0.350408	0.178251	0	0	0	0	0.600879	0	0	0	0
TCONS_00040481	0	0	0	0	0	0	0	0	0	0	0	0	0	0	0	0	0	0	0	0	0
TCONS_00040482	0	0	0.15454	0	0	0	0	0	0.070013	0	0	0	0	0	0	0	0	0	0	0	0
TCONS_00040489	0	0	0	0	0	0	0	0	0	0	0	0	0	0	0	0	0	0.152728	0	0	0
TCONS_00040517	0	0	0	0	0	0	0	0	0	0	0	0.0100274	0.217926	0	0	0.0394304	0.48816	0.0883504	0.359502	0.264624	0
TCONS_00040518	0	0	0	0	0	0	0	0	0	0	0.00303824	0	0.194876	0.151888	0.0783393	0.0246918	0.454443	0	0	0.0705994	0
TCONS_00040531	0	0	0	0	0	0	0	0	0	0	0	0	0	0	0	0	2.20416	0	0	0	0
TCONS_00040532	0	0	0	0	0	0	0	0	0	0	0	0	1.7032	0	0	0	0	0	0	0.476289	7.26461
TCONS_00040547	0.0214465	0	0	0.0922899	0	0	0.0537798	0.0228803	0	0	0.0546793	0	0	0.0621489	0.104196	0	0	0	0	0.202265	0.293616
TCONS_00040548	0	0	0	0	0	0	0	0	0	0.0408259	0	0.0198544	0	0	0	0.0862192	0.193495	0.170694	0	0	0
TCONS_00040549	0	0	0.035149	0.0227411	0.0360701	0.129904	0	0	0.019561	0	0	0.0356742	0.060198	0.0505112	0	0.09252	0.140299	0.145387	0.178432	0.0635091	0.135968
TCONS_00040557	0.140698	0.330767	0.104344	0.114185	0.219651	0.121428	0.193003	0.264371	0.133081	0.161915	0.101171	0.0702553	0.0497857	0.0274378	0.0405817	0.113419	0.055921	0.208461	0.0468134	0.108721	0.037424
TCONS_00040560	0	0	0	0	0	0	0	0	0	0.291772	0	0	0.671368	1.36563	1.05184	0.307224	1.60021	1.00681	0.983252	2.09438	2.95648
TCONS_00040561	0	0	0	0	0	0	0	0	0	0	0	0	0.867839	0	0	0	0	0	0	1.12777	0
TCONS_00040562	0.139966	0.0386389	0	0	0	0	0	0	0.070082	0	0	0	0.805409	1.54324	0	1.12359	5.35959	0.489431	2.07442	2.50351	3.88536
TCONS_00040563	0	0	0	0	0	0	0	0	0	0	0	0	0	0.820739	0.942651	0	1.40193	0	0	0	0
TCONS_00040564	0	0	0	0	0	0	0	0	0	0	0	0	0	0	0.669259	0.286682	0	1.07305	1.08261	0	0
TCONS_00040565	0	0	0	0	0	0	0	0	0	0	0	0	0	0	0	0	0	0	1.01718	0	0
TCONS_00040566	0	0	0.173103	0.137867	0	0	0	0.129154	0	0	0.120927	0	0	0	0	0	0	0.493175	0	0	0
TCONS_00040569	0	0	0	0.0366645	0	0	0	0	0	0.126797	0	0	0	0	0	0	0	0	0	0	0
TCONS_00040573	0.100841	0.0539688	0	0.083846	0.0641874	0	0.0770748	0.0708426	0.174662	0.207209	0.0203513	0.14962	0.09701	0.256769	0.0744469	0.183052	0.0397167	0.125692	0.0218149	0.00601063	0.039891
TCONS_00040574	0	0	0	0	0	0	0	0	0	0	0	0	0.0227817	0.151781	0	0	0.00941111	0	0.0784077	0	0
TCONS_00040575	0	0	0	0	0	0	0.13057	0	0	0	0	0	0	0	0	0.0877163	0	0	0	0.0291892	0
TCONS_00040652	0.0661957	0	0.0321146	0	0.0542872	0	0	0.0265977	0.0395419	0.313676	0.1406	0.26169	0.293304	0	0.123297	0.132579	0.027932	0.112536	0.0491282	0.0671223	0.0755195
TCONS_00040657	0.0549144	0.0710674	0.161777	0.0309405	0.0794762	0	0.0851786	0.162885	0.00933073	0.108706	0	0.0293307	0.0288646	0.0882229	0.102374	0.0338542	0.00838572	0	0.0498539	0.0410287	0.128792
TCONS_00040676	0	0.150609	0.270947	0.17412	0	0.428634	0.0981691	0	0.390681	0	0.40737	0.354368	0	0.071731	0.177802	0	0	0.136386	0.136739	0	0
TCONS_00040719	0	0	0	0	0	0	0	0	0	0	0	0	0	0	0	0	0	0	0	0	0
TCONS_00040720	0	0	0	0	0	0	0	0	0	0	0	0	0	0	0	0	0	0	0	0	0
TCONS_00040721	0	0	0	0	0	0	0	0	0	0	0	0.00511286	0.566494	0	0.823505	0	0.507479	0	0	0	0
TCONS_00040722	0	0	0	0	0	0	0	0	0	0	0	0	0	0	0	0	0	0	0	0	0
TCONS_00040723	0	0	0	0	0	0	0	0	0	0	0	0	0	0.809263	0	0.457155	0	0	0.972903	0.667174	1.52489
TCONS_00040726	0	0.00288666	0	0	0.00558345	0.00692387	0	0	0	0	0	0	0	0	0	0	0	0	0	0	0
TCONS_00040742	0	0	0	0	0	0	0	0	0	0	0	0	0	0	0	0	0	0	0	0	0.712664
TCONS_00040744	0	0	0	0	0	0	0	0	0	0	0	0	0	0	0	0	0	0	0	0	0
TCONS_00040758	0	0	0	0	0	0	0	0	0	0	0	0	0.209241	0	0	0.198576	0.14144	0	0.309085	0.0559668	0.409532
TCONS_00040768	0	0	0	0	0	0	0	0	0	0	0	0	0.396906	0	0	0	0	0	0	0	0
TCONS_00040769	0	0	0	0	0	0	0	0	0	0	0	0	0	0	0	0.11237	0	0	0	0	0
TCONS_00040770	0	0	0	0	0	0	0	0	0	0	0	0	0	0.638015	0.313281	0	1.42328	0.741262	1.47469	0.45857	1.03279
TCONS_00040771	0	0	0	0	0	0	0	0	0	0	0	0	0	0	0.205631	0	0.759448	0.58295	0	0.663482	0
TCONS_00040772	0	0	0	0	0	0	0	0	0	0	0	0	0.385949	0	0	0	1.06882	0.784564	1.26263	1.18891	1.30293
TCONS_00040773	0	0	0	0	0	0	0	0	0	0	0	0	0	0	1.05584	0	0	0	0	0	0
TCONS_00040774	0.0110096	0	0.0244849	0	0.0241493	0	0	0	0.0225264	0	0	0	0.204898	0.279589	0.366706	0.182674	0	0	0.571819	0	0
TCONS_00040775	0	0	0	0	0	0	0	0	0	0	0	0	0	0	3.42188	0	0	0	0	0	0
TCONS_00040776	0	0	0	0	0	0	0	0	0	0	0	0	0	0.375988	0	0.236437	0	0	0	0	0
TCONS_00040798	0.02146	0.028236	0.0141122	0.029242	0.00461768	0.0147097	0.00439274	0.00458265	0	0	0	0	0.0973884	0.246713	0.188775	0	0.217111	0.091101	0.0874079	0.117671	0.602922
TCONS_00040801	0	0	0	0	0.0799216	0	0	0	0	0	0	0	0	0	0	0.312846	0	0	0	0	0
TCONS_00040811	0	0.00817962	0.0157818	0	0.0159614	0.00823044	0.0151332	0.0743134	0	0	0.0235439	0.0463547	0.0636179	0.0158231	0.101175	0.0506986	0.129326	0.0221927	0.0377759	0.0303492	0.111595
TCONS_00040827	0	0	0	0	0	0	0	0.0572704	0	0	0	0	0	0.0293538	0.031338	0.0435098	0	0	0.0595354	0	0.134985
TCONS_00040828	0	0	0	0	0	0	0	0	0	0	0	0	0.229883	0.588934	0.124595	0	0	0	0.0680128	0.252165	0
TCONS_00040840	0	0	0	0	0	0	0	0	0	0	0	0	0	0	0	0	0	0	3.21095	0	0
TCONS_00040841	0	0	0	0	0	0	0	0	0	0	0	0	0	1.00161	0	0	0	0.97726	0	0	0
TCONS_00040842	0	0	0	0	0	0	0	0	0	0	0	0	0.706957	0.939992	0.65642	0	0	1.98309	1.18578	4.80159	0.288868
TCONS_00040843	0	0	0	0	0	0	0	0	0	0	0	0	0.554722	0	0	0	0	0	0	0	0
TCONS_00040844	0	0	0.0577241	0	0	0	0	0	0	0	0	0	4.41125	5.35795	2.72181	0.155144	0.0994922	0	0	0	0
TCONS_00040846	0	0	0	0.0224521	0	0	0	0	0	0	0	0	0	0	0	0	0	0	0	0	0
TCONS_00040865	0	0	0	0	0	0	0	0	0	0	0	0	0	0	0	0	0	0	0	0	0
TCONS_00040866	0	0	0	0	0	0	0	0	0	0	0	0	0	0	0	0	0	0	0	0	0
TCONS_00040906	0	0.0565784	0.0320673	0	0	0.0599397	0	0	0	0	0	0	0	0	0.0122276	0	0	0	0	0	0
TCONS_00040907	0.0269366	0	0.00914925	0.0282513	0.0538496	0	0	0.0509332	0	0.0509727	0.0485231	0	0.026388	0	0	0.0639074	0	0.0255388	0	0	0
TCONS_00040908	0	0	0.0174403	0	0	0	0	0.0299546	0.136091	0	0.0519274	0.0467992	0	0	0.0460622	0.0813137	0	0.0163007	0.0257263	0.0172205	0.0166761
TCONS_00040909	0	0.013414	0	0	0.195741	0	0.181271	0	0	0	0	0	0	0	0	0	0	0	0	0	0
TCONS_00040911	0	0	0.0269171	0.0371915	0	0	0	0	0	0.114482	0	0	0	0	0	0	0.0134482	0.0409919	0	0	0
TCONS_00040991	0.052446	0.0399933	0.0386371	0.0407282	0.058899	0.061298	0	0.0755865	0.1259	0	0.170946	0.0765014	0.431396	0.543331	0	0	0.55281	0.504423	0.330529	0.223761	0.378218
TCONS_00040993	0	0.0719776	0	0	0	0.0739266	0	0	0	0	0	0	0	0	0	0	0	0	0	0	0
TCONS_00040995	0	0	0	0	0	0	0	0	0	0	0	0	0	0	0	0	0	0	0.382439	0.204325	0
TCONS_00041012	0.00748144	0.00430391	0	0	0	0.00873329	0	0.0158265	0	0	0	0	0	0	0	0	0	0	0	0	0
TCONS_00041069	0	0	0	0	0	0	0	0	0	0	0	0	0	0	0	0	29.3725	0	4.89755	0	0
TCONS_00041070	0	0	0	0	0	0	0	0	0	0	0	0	0	0	0	0	15.6532	0	0	12.8984	10.7932
TCONS_00041103	0	0	0	0	0	0	0	0	0	0	0	0	0.260713	0.507759	0	0.110035	0.415887	0.26002	0.445759	0.666219	0.0837299
TCONS_00041109	0	0	0	0	1.14061	0	0	0.106455	0	0	0.104823	0	0	0	0	0	0	0	0	0	0
TCONS_00041122	0	0	0.0189393	0.0197647	0	0	0	0.0373785	0	0	0	0	0	0	0	0.457681	0.662496	0	0.509975	0.390129	0.431023
TCONS_00041123	0.0640751	0	0	0	0.0346864	0	0	0	0	0	0	0	0	2.55512	0	0.364551	0	0	0.714051	1.76493	0.561778
TCONS_00041124	0	0	0	0	0	0	0	0	0	0	0	0	1.38433	0	1.99407	0	0.381189	0.381226	0	0	0
TCONS_00041126	0	0	0	0	0	0	0	0	0	0	0	0	0	0	0	0	0	0	0	0	0
TCONS_00041127	0	0	0	0	0	0	0	0.00248724	0	0	0	0	0	0	0	0	0	0	0	0	0
TCONS_00041129	0.0108594	0	0	0	0	0	0	0.00340222	0	0	0	0	0	0	0	0.482337	1.54204	0	1.69289	0	0
TCONS_00041161	0	0.192067	0	0	0	0	0	0	0	0	0	0	0	0	0	0	2.60729	0	0	0	0
TCONS_00041163	0.015191	0.0187732	0	0.0705024	0	0	0.0679968	0	0.0671089	0	0.0817987	0	0.278506	0.0876654	0.28066	0.057935	0	0.0206525	0.085683	0.351155	0.040732
TCONS_00041172	0.0434025	0	0.024202	0	0	0	0	0	0	0.349256	0	0	0	0	0.153723	0.0970711	0	0.097692	0.0247187	0.344337	0.0250299
TCONS_00041283	0	0	0	0	0	0	0	0	0	0	0	0	0	0	0	0	0	0	0	0	0
TCONS_00041327	0	0	0	0	0	0	0	0	0	0	0	0.446573	0	0	0	0.222108	0	0.416921	0.417205	0	0.447257
TCONS_00041452	0	0	0	0	0	0	0	0	0	0	0	0	0	0	0	0	0	0	0	0	0
TCONS_00041494	0	0	0	0	0	0	0	0	0	0	0	0	0.512856	1.68665	1.01432	0	0.26304	0	0.381909	0.864852	0.268885
TCONS_00041511	0	0	0.0942124	0	0	0	0.0424317	0	0	0	0	0	0	0	0	0	0	0.0893537	0.111184	0	0
TCONS_00041513	0	0	0	0	0	0.0525611	0	0	0.0344649	0	0	0	0	0.287527	0	0	0	0	0	0.169957	0
TCONS_00041527	0	0	0	0	0	0.0366742	0	0	0.00752274	0	0	0	0.406973	0.316568	0	0	0.794477	0	0.46143	0	0
TCONS_00041528	0	0.00885686	0.0034907	0	0	0	0.007989	0	0	0	0	0	0	0	0.159492	0	0	0	0	0.137599	0
TCONS_00041529	0	0	0	0	0	0	0	0	0	0	0	0	0	0	0	0	0	0	0	0	0
TCONS_00041530	0	0	0	0	0	0	0	0	0	0	0	0	0	0	0	0	0	0	0.319818	0	0
TCONS_00041531	0	0	0	0	0	0	0	0	0	0	0	0	0	0	0	0	0	0	0	0	0
TCONS_00041543	0	0	0	0	0	0	0	0	0	0	0	0.0934314	0.304758	0.262107	0	0	0	0	0	0	0
TCONS_00041544	0	0	0	0	0	0	0	0	0	0	0	0	0	0.556981	0.854423	0	1.19677	0.915883	0.969641	0.970446	1.25861
TCONS_00041545	0	0	0	0	0	0	0	0	0	0	0	0	0	0	0	0	0.986553	0	0	0	0
TCONS_00041546	0	0.03234	0.00859114	0	0	0	0.0125108	0	0.0187456	0	0.0149284	0	0	0	0	0	0	0	0	0	0
TCONS_00041547	0	0	0	0	0	0	0	0	0	0	0	0	0	0	0	0	0	0	0	0	0
TCONS_00041548	0	0	0.0128721	0	0	0	0	0	0	0	0	0	0	0	0	0	0	0	0	0.456561	0
TCONS_00041549	0	0	0	0	0.0621855	0	0	0	0	0	0	0	0	0	0	0	0	0	0	0	0
TCONS_00041552	0	0	0	0	0	0	0	0	0	0	0	0	0	0	0	0	0	0	0.377652	0	0
TCONS_00041553	0	0	0	0	0	0	0	0	0	0	0	0	0.615211	0.369702	0.382737	0	0	0	0	0	0
TCONS_00041554	0	0	0	0	0	0	0.0112661	0	0	0	0	0	0	0	0	0	0	0	0	0	0
TCONS_00041571	0	0.0789296	0	0.0463901	0	0.079709	0.0266673	0.0874195	0.0454119	0.215202	0.302473	0.233812	0.00508247	0	0.0895757	0.135353	0.0594693	0.14848	0.0491974	0.0411331	0.111972
TCONS_00041574	0	1.22463	0	0	0.873642	0	0	0	0	0	1.59969	0	0	0	0	0.646002	0	0	0	0	0
TCONS_00041575	0	0.292063	0	0	0	0	0	0	0	0	0	0	0.298586	0	0	0	0	0.154607	0	0	0
TCONS_00041576	0	0	0	0	0	0	0	0	0	0	0	0	0	0.358262	0	0	0.874828	0	0.349457	0.419747	0.306383
TCONS_00041586	0	0	0	0	0	0	0.222501	0	0	0	0.382724	0	0	0	0	0	0	0	0	0	0
TCONS_00041588	0	0.0714534	0	0	0	0	0	0	0	0	0	0	0	0	0	0	0	0	0	0	0.0385724
TCONS_00041589	0	0	0	0	0	0	0	0	0	0	0	0	0	0	0	0	0	0	0	0	0
TCONS_00041590	0	0	0	0	0	0	0	0	0	0	0	0	0	0	0	0	0	0	0	0	0
TCONS_00041591	0	0	0	0	0	0	0	0	0	0	0	0	0	0	0	0	0	0	0	0	0
TCONS_00041592	0	0	0	0	0	0	0	0	0	0	0	0	0	0.037718	0.0742423	0	0	0	0.0183001	0	0
TCONS_00041593	0.0807774	0	0.0627231	0.0842019	0.14899	0	0.151271	0	0	0	0	0.216706	0.0549399	0	0	0.112541	0.0135824	0.0669202	0	0.0165782	0
TCONS_00041594	0	0	0	0	0	0	0	0	0	0	0	0	0	0	0	0	0	0	0	0	0
TCONS_00041595	0	0	0	0	0	0	0	0	0	0	0	0	0	0	0	0	0	0	0	0	0
TCONS_00041596	0	0	0.0608522	0.0464162	0	0	0	0	0	0	0.145459	0.0834448	0	0	0	0.0800221	0	0.0849943	0	0	0
TCONS_00041597	0	0	0	0	0	0	0	0	0	0	0	0	0	0.0275527	0	0	0	0	0	0	0
TCONS_00041598	0.279652	0.203162	0.269419	0.13467	0.26206	0.290264	0.2485	0.258472	0.133822	0.656866	0.357838	0.246555	0.0665217	0.0274292	0.0964505	0.177636	0.0275141	0.15101	0.0514604	0	0.138219
TCONS_00041599	0	0	0	0	0	0	0	0	0	0	0	0	0	0.030005	0	0	0	0	0	0	0
TCONS_00041601	0	0	0	0	0	0	0	0	0	0	0	0	0	0.0259069	0	0	0	0	0	0	0
TCONS_00041603	0	0	0	0	0.0812521	0	0.0649665	0	0	0	0	0.0738351	0	0	0	0	0	0	0.0179642	0	0.0672157
TCONS_00041604	0	0	0	0	0	0	0	0	0	0	0	0	0.0150853	0	0	0	0	0.0242832	0	0.0101958	0
TCONS_00041605	0.112952	0	0.0957598	0	0.0841095	0	0.0478991	0.0609564	0	0.0330968	0	0.157917	0	0.0559767	0	0	0	0.0594148	0.0167643	0.0191914	0.04486
TCONS_00041606	0	0.165567	0	0.137259	0.0750339	0.1389	0	0.0507045	0.096227	0.0385604	0	0.0659804	0.021221	0	0	0.174696	0.019246	0.0354007	0.0413058	0	0
TCONS_00041607	0	0	0	0	0	0	0	0	0.0996317	0	0	0	0	0	0	0	0.0331038	0.104888	0	0	0
TCONS_00041608	0.291164	0.489302	0.252335	0	0	0	0.125015	0	0.190144	0.129269	0.419722	0	0.0488921	0.111031	0.076978	0.138317	0	0	0	0.0571506	0.194337
TCONS_00041807	0	0	0	0	0	0	0	0	0	0	0	0	0	0	0	0	0	0	0	0	0
TCONS_00041809	0	0	0	0	0	0	0	0	0	0	0	0	0	0	0	0	0	0	0	0	0
TCONS_00041880	0	0.0401558	0.0217512	0.136004	0.115342	0.0217505	0	0	0.0528393	0	0.0980662	0.236491	0	0.0520718	0	0.159886	0.0689477	0.047959	0	0.10438	0.0145914
TCONS_00041881	0.164004	0.462332	0.30952	0.321494	0.387686	0.352546	0.206264	0.0926754	0.26094	0.323261	0.0579796	0.0727163	0.34239	0	0.340925	0.126022	0.110358	0.255529	0.079184	0	0
TCONS_00041894	0	0	0.0120114	0	0	0	0	0	0	0	0	0.0235665	0	0.190079	0.191625	0.144677	0.134283	0	0.409309	0.365024	0.187849
TCONS_00041895	0	0	0	0	0	0	0	0	0	0	0	0	0	0	0	0	0	0.084354	0	0.221047	0
TCONS_00042010	0	0	0	0	0	0	0	0	0	0	41.7986	0	0	0	0	0	0	0	0	0	0
TCONS_00042017	0.0110728	0	0.0729244	0	0	0	0	0.0123655	0	0	0	0	0.0892801	0.0660867	0.187266	0.226707	0.16746	0.0641247	0.416231	0.551574	0.196447
TCONS_00042028	0.0535837	0	0.069012	0.00810008	0.188803	0.129726	0.0707799	0.084124	0.0234257	0.468882	0.274292	0.336206	0.188312	0.186629	0.159292	0	0.136075	0.0940635	0.184847	0.128171	0.066699
TCONS_00042036	0.0439334	0.0563521	0.0234977	0.238855	0.0288637	0.0299953	0.152695	0.0759872	0.052345	0	0.126176	0	0	0	0.0576298	0.173177	0	0.12011	0.0554392	0	0.0706768
TCONS_00042037	0.0656618	0.166347	0.0528355	0	0.0608758	0	0	0.047401	0.266247	0.255161	0	0	0	0	0.431205	0.0471698	0	0	0	0.113121	0.0397312
TCONS_00042115	0	0	0	0	0	0	0	0.0561268	0.0367421	0.202092	0	0.151335	0.221838	0.0803318	0	0.02332	0.0239667	0.0740498	0	0.0791287	0
TCONS_00042152	0	0	0	0	0	0	0	0	0	0	0	0	0	0	0	0	0	0	0	0	0
TCONS_00042162	0	0	0	0	0	0	0	0	0	0	0	0	0	3.41809	0	0	0	0	0	0	0
TCONS_00042163	0	0	0	0	0	0	0	0	0	0	0	0	0	0.590073	0.139419	0.0703341	0	0	0.14577	0.170931	0.197019
TCONS_00042165	0	0	0	0	0	0	0	0	0	0	0	0.0112907	0	0	0	0	0.212438	0	0	0	0
TCONS_00042212	0	0	0	0	0	0	0	0	0	0	0	0	0	0	0	0	0	0	0	0	0
TCONS_00042216	0	0	0	0	0	0	0	0	0	0	0	0	0	0	0	0	0	0	0	0	0
TCONS_00042231	0	0	0	0	0	0	0	0	0	0	0	0	0	0	0	0	0	0	0	0	0
TCONS_00042232	0	0	0	0	0	0	0	0	0	0	0	0	0	0	0	0	0	0	0	0	0
TCONS_00042233	0	0	0	0	0	0	0	0	0	0	0	0	0	0	0	0	0	0	0	0	0
TCONS_00042234	0	0	0	0	0	0	0	0	0	0	0	0	0	0	0	0	0	0	0	0	0
TCONS_00042236	0	0	0	0	0	0	0	0	0	0	0	0	0	0	0	0	0	0	0	0	0
TCONS_00042237	0	0	0	0	0	0	0	0	0	0	0	0	0	0	0	0	0	0	0	0	0
TCONS_00042245	0	0	0	0	0	0	0	0	0	0	0	0	0	0	0.0876862	0.0626422	0.559706	0.0671264	0.521894	0.218435	0.0331251
TCONS_00042248	0	0	0	0.169897	0.0946691	0	0.0655153	0	0	0	0.0441967	0.205757	0.120033	0.113527	0	0.097395	0.0483541	0	0.0251876	0.0253008	0.0507348
TCONS_00042257	0.0744664	0	0	0.0585532	0	0	0.178312	0.163492	0	0.132875	0.3592	0.365016	0.106772	0.116862	0.0552835	0	0.0811286	0	0	0	0
TCONS_00042259	0	0	0	0	0	0	0	0	0	0	0	0	0.105111	0.396177	0.5084	0	0	0	0.341182	0	0.715902
TCONS_00042327	0	0	0	0.330895	0.312366	0	0.38491	0	0	0	0	0.405383	0.49248	0	0	0.108943	0.431801	0.155824	0	0	0.0295894
TCONS_00042328	0	0	0	0	0	0	0	0	0	0	0	0	0	0	0	0	0	0	0	0	0
TCONS_00042329	0	0.496698	0	0	0	0.893869	0	0.799753	0	0	1.10845	0	0	0	0	0	0	0	0	0	0
TCONS_00042330	0	0	0	0	0	0.203209	0.373293	0	0	0	0	0	0	0	0	0	0	0	0.137258	0.123332	0
TCONS_00042331	0	0	0	0	0	0	0	0.792989	0	0	0	0	0	0	0	0	0	0	0	0	0
TCONS_00042332	0.771162	0.310027	0	0.64841	0.762498	0.593456	0.694348	0.669391	0.265078	0	0	0	0	0	0.579826	0.190177	0.220426	0.302896	0.218763	0	0.187038
TCONS_00042333	0	0	0	0	0	0	0	0	0	0	0	0	0	0	0	0	0	0	0	0	0
TCONS_00042339	0.27018	0	0.300609	0	0.280908	0.318505	0	0.437322	0	0.258585	0.115097	0.339828	0.137408	0	0.201738	0.207047	0.0876234	0.103463	0.0364242	0.0565951	0.0166071
TCONS_00042370	0	0	0	0	0	0	0	0	0	0	0	0	0	0	0	0	0	0.340041	0	2.22566	0
TCONS_00042391	0	0	0	0	0	0	0	0	0	0	0	0	0	0	0	0	0	0	0	0	0
TCONS_00042392	0	0	0	0	0	0	0	0	0	0	0	0	0	0	0	0	0	0	0	0	0
TCONS_00042393	0	0	0	0	0	0	0	0	0	0	0	0	0	0	0	0	0	0	0	0	0
TCONS_00042394	0	0	0	0	0	0	0	0	0	0	0	0	0	0	0	0	0	0	0	0	0
TCONS_00042484	0	0	0.11794	0	0.0619531	0	0	0	0.0536379	0	0	0	0.17943	0	0	0	0	0	0	0	0
TCONS_00042485	0.0923878	0	0	0	0	0	0	0.0438282	0.0997134	0	0.123163	0	0	0.150594	0.242417	0	0	0.330277	0	0.140231	0
TCONS_00042495	0.0463818	0.0486254	0.0282036	0.0293195	0.0296038	0.0245091	0.0276258	0.0167927	0	0	0	0.0111171	0.0305668	0.0350654	0.114782	0.119178	0	0.0495002	0.113901	0.281298	0.102345
TCONS_00042497	0	0.0571988	0	0.227533	0.0556951	0.0581625	0.0357409	0.017707	0	0	0.153925	0.203746	0.0366452	0	0.0198566	0	0	0.0327816	0	0	0
TCONS_00042655	0	0.110941	0	0.0815492	0	0.099433	0	0	0	0	0	0	0	0	0.0577927	0.0851966	0	0	0.0634065	0.0409141	0.0719556
TCONS_00042686	0.142194	0	0.0916174	0	0.200778	0.181929	0.156721	0.143251	0.0579022	0.0633876	0	0.0157073	0.0272326	0	0	0.0845426	0.00322885	0.0354026	0.0164235	0.0165801	0.0228769
TCONS_00042781	0	0.0220279	0	0.00752216	0	0	0	0	0	0	0	0	0	0	0.243939	0	0.570551	0.30107	0	0	0
TCONS_00042784	0	0	0	0	0	0	0	0	0	0	0	0	0.366804	0	0.089362	0.441429	0.130783	0.122411	0	0.726683	0
TCONS_00042785	0	0	0	0.00328454	0.0126902	0	0.00481342	0.00938329	0.0239001	0	0.00497652	0.0206801	0.0756761	0.506969	0.247601	0.0958211	0.341217	0.258952	0.561856	0	0.790996
TCONS_00042910	0	0	0	0	0	0	0	0	0	0	0	0	0	0	0	0	0	0	0	0	0
TCONS_00043010	0	0	0	0	0	0	0	0	0	0	0	0	4.64778	4.07902	4.48941	1.10319	12.328	5.20467	3.59845	6.6857	7.45602
TCONS_00043034	0	0	0	0	0.880544	0.562568	2.12976	0	0.833882	0.210641	0	0.184235	0.163963	0	0	0.69786	0	0	0.992844	0.157757	0
TCONS_00043078	0.0317439	0.065029	0.06091	0.0634193	0.0557741	0	0.0418061	0	0	0	0.115118	0	0	0	0.202631	0	0	0.0894149	0.0465755	0.0606644	0.0176205
TCONS_00043082	0	0	0	0	0	0	0	0	0	0	0	0	0	0	0	0	0	0	0	0	0
TCONS_00043106	0.00709234	0.0403746	0.0313129	0.00800735	0.0393947	0.0163755	0.0376139	0	0	0	0	0	0.0504862	0.236721	0.125862	0.0880809	0.128764	0.022497	0.182291	0.0611769	0.155418
TCONS_00043107	0	0	0	0	0	0	0	0	0	0	0	0	0	0	0	0.0753143	0	0	0	0	0.329999
TCONS_00043117	0.0772785	1.11877	0	0	0	0.0892227	0.155597	0	0	0	0	0	0	0	0	0.0750718	0	0	0	0	0
TCONS_00043165	0	0	0	0	0	0	0	0	0	0.0745352	0	0	0	0.218162	0	0	0	0	0	0	0
TCONS_00043234	0	0	0	0	0	0	0	0	0	0	0	0	0	0	0	0	0	0	0	0	0
TCONS_00043235	0	0	0	0	0	0	0	0	0	0	0	0	0	0	0	0	0	0	0	0	0
TCONS_00043236	0	0	0	0	0	0	0	0	0	0	0	0	0	0	0	0	0	0	0	0	0
TCONS_00043237	0	0	0	0	0	0	0	0	0	0	0	0	0	0	0	0	0	0	1.68922	0	1.74645
TCONS_00043240	0	0	0	0	0	0	0	0	0	0	0	0	0	0	0	0	0	0	0	0	0
TCONS_00043241	0	0	0	0	0	0	0	0	0	0	0	0	0	0	0	0	1.23847	0.780144	0	0	0
TCONS_00043243	0	0	0	0	0	0	0	0	0	0	0	0	0	0	0	0	0	0	0	0	0
TCONS_00043275	0	0	0	0	0	0	0	0	0	0	0	0	0	0	0	0	0	0	0	0	0
TCONS_00043561	0	0	0	0	0	0	0	0	0	0	0	0	0	0	0	0	0	0	0	0	0
TCONS_00043562	0	0	0	0	0	0	0	0	0	0	0	0	0	0	0	0	0	0	0	0	0
TCONS_00043563	0	0	0	0	0	0	0	0	0	0	0	0	0	0	0	0	0	0	0	0	0
TCONS_00043565	0	0	0	0	0	0	0	0	0	0	0	0	0	0	0	0	0	0	0	0	0
TCONS_00043566	0	0	0	0	0	0	0	0	0	0	0	0	0	0	0	0	0	0	0	0	0
TCONS_00043567	0	0	0	0	0	0	0	0	0	0	0	0	0	0	0	0	0	0	0	0	0
TCONS_00043568	0	0	0	0	0	0	0	0	0	0	0	0	0	0	0	0	0	0.593933	0	0.575287	0
TCONS_00043569	0	0	0	0	0	0	0	0	0	0	0	0	0	0	0	0	0.0747677	0	0	0	0
TCONS_00043571	0	0	0	0	0	0	0	0	0	0	0	0	0.205774	0	0.287324	0.3142	0.310543	0	0.733102	0.623699	0.282477
TCONS_00043572	0	0	0	0	0	0	0	0	0	0	0	0	0	1.31443	0	0	0	0	0	0	0
TCONS_00043638	0	0	0	0	0	0	0	0	0	0	0	0	0	0.0761298	0	0.113255	0.14173	0	0.077501	0	0.494724
TCONS_00043639	0	0	0	0	0	0	0	0	0	0	0	0	0	0	0	0	0	0.0499738	0	0.216037	0
TCONS_00043641	0	0	0	0	0	0	0	0	0	0	0	0	0	0	0	0	0	0	0	0.266698	0
TCONS_00043642	0	0	0	0	0	0	0	0	0	0	0	0	0	0	0	0	0.221779	0	0.233072	0	0
TCONS_00043643	0	0	0	0	0	0	0	0	0	0	0	0	0.133979	0	0	0	0	0	0	0	0
TCONS_00043644	0	0	0	0	0	0	0	0	0	0	0	0	0	0	0.284244	0	0	0	0	0	0
TCONS_00043645	0	0	0	0	0	0	0	0.0142103	0	0	0	0	0.208355	0	0	0	0	0.148428	0	0	0
TCONS_00043646	0	0	0	0	0	0	0	0	0.00844529	0	0	0	0	0.333613	0	0	0.562772	0.126813	0.356962	0.406065	0
TCONS_00043647	0	0	0	0	0	0	0	0	0	0	0	0	0	0	0	0	0	0	0.150203	0	0
TCONS_00043648	0	0	0	0	0	0	0	0	0	0	0	0	0	0.114661	0.225277	0	0	0	0.189781	0	0
TCONS_00043654	0	0	0	0	0	0	0	0	0	0	0	0	0	0	0.436161	0	0	0.296153	0	0	0
TCONS_00043699	0	0	0	0	0	0	0	0	0	0	0.196183	0	0	0	0	0.317243	0	0.117984	0.304681	0.252147	0.338029
TCONS_00043700	0.0850612	0	0	0	0	0	0	0	0	0	0	0.101034	0	0.19184	0.264066	0.172785	0	0.240353	0.159962	0.814335	0.140039
TCONS_00043722	0	0	0	0	0	0	0	0	0	0	0	0	0	0	0	0	0	0	0	0	0
TCONS_00043808	0	0	0	0	0	0	0	0	0	0	0	0	0	1.81999	0	0	2.41402	1.98374	2.12075	2.61647	0
TCONS_00043809	0	0	0	0	0	0	0	0	0	0	0	0	0	0	0	0	0	0	0	0	0
TCONS_00043832	0.0287891	0	0.0213199	0.0214416	0	0	0.0203961	0	0	0.0509243	0	0.0748215	1.51343	0	2.76256	0.943037	1.41836	1.20505	1.42817	5.33198	3.42069
TCONS_00043833	0	0	0	0	0	0	0	0	0	0	0	0	0.52339	1.19298	0	0.196327	4.17314	0	0.386054	0.891975	0.55237
TCONS_00043838	0	0	0	0	0	0	0	0	0	0	0	0	0	0	0	0	31.2533	0	0	0	0
TCONS_00043859	0	0.227143	0	0.275115	0	0.199011	0.0909901	0	0	0	0	0	0	0	0	0.0108924	0	0	0	0.0914673	0
TCONS_00043861	0.134254	0	0	0.342061	0	0	0	0	0	0	0.0299743	0	0	0	0.123999	0	0	0	0	0	0
TCONS_00043862	0	0	0.111801	0	0	0	0	0	0	0	0	0	0.117214	0.0729692	0	0	0	0	0	0.0691938	0.0670878
TCONS_00043864	0	0	0	0	0.130055	0	0	0	0	0	0	0.083333	0	0	0.094701	0	0	0	0.0608318	0	0
TCONS_00043874	0.0683701	0	0.165706	0	0	0	0	0.140185	0.293919	0	0.0629755	0	0	0	0	0.0384984	0	0.16273	0.136135	0	0
TCONS_00043930	0	0	0	0	0.0786262	0.0411701	0	0.0981531	0	0	0	0	0.288049	0.178063	0.124217	0.155773	0.103371	0.0691992	0.0515148	0.170606	0.0530334
TCONS_00043970	0.0764175	0	0.0650952	0.367648	0.0888269	0.0666508	0.0253877	0.118892	0.0675608	0	0.0464712	0.0277027	0	0	0	0	0.257827	0.735564	0	0.480989	0.677454
TCONS_00044012	0	0	0	0	0	0	0	0.0246206	0	0	0	0	0.080717	0.439318	0	0.0474102	0.0242162	0.0726827	0.450959	0	0.0487956
TCONS_00044025	0	0	0	0	0	0	0	0	0	0	0	0	0	0	0	0	0	0	0	0	0
TCONS_00044034	0	0	0	0	0	0	0	0	0	0	0	0	0	0	0	0	0	0.66055	0	1.41909	0
TCONS_00044065	0.40958	0.404017	0.363235	0.796017	0.186598	0.147506	0.0653068	0.162487	0.15313	0	0	0.207098	0.0349443	0.139297	0	0.0516791	0	0.114643	0.0103197	0.0617739	0
TCONS_00044098	0	0	0.235859	0	0.375932	0	0	0.106277	0	0.259779	0	0	0.112431	0	0.0718521	0	0.205031	0.156268	0	0	0
TCONS_00044190	0	0	0	0	0	0	0	0	0	0	0	0	0	0	0	0	0	0.356078	0	0	0
TCONS_00044264	0	0	0	0	0	0.144171	0	0	0	0	0	0	0	0	0	0	0	0.0326241	0	0	0
TCONS_00044280	0	0	0	0	0	0	0	0	0	0	0	0	0	0	0	0	0	0	0	0	0
TCONS_00044308	0.0281213	0.095975	0.0308933	0.216914	0.109117	0	0.0592037	0.185941	0.0298547	0.132503	0	0.0310659	0.0633406	0.0638933	0	0.043394	0.0147039	0	0	0.11832	0.0292526
TCONS_00044312	0	0	0	0	0	0	0	0	0	0	0	0	0	0	0	0	0	0	0.0627096	0.344128	0.0324623
TCONS_00044319	0	0	0	0	0	0	0	0	0.0205922	0	0	0	0	0	0	0	0	0	0	0	0
TCONS_00044357	0	0	0	0	0	0	0	0	0	0.0476517	0	0.0448987	0	0	0	0	0	0	0	0	0.205142
TCONS_00044358	0	0	0	0	0	0	0	0.0156199	0	0	0	0	0	0	0	0	0	0	0	0	0
TCONS_00044361	0	0	0.00465517	0	0	0	0	0	0	0.036264	0	0	0	0	0.050784	0.0634449	0.537042	0.560765	0	0	0.259809
TCONS_00044362	0	0	0.00455238	0	0	0	0	0	0	0	0	0	0	0	0.0480443	0	0.644916	0.257967	0.122728	0	0.311188
TCONS_00044367	0	0	0	0	0	0	0	0	0	0	0	0	0	0	0	0	0	0	0	0	0
TCONS_00044368	0	0	0	0	0	0	0	0	0	0	0	0	0	0	0	0	0	0	0	0	0
TCONS_00044383	0	0.10149	0.24029	0	0	0	0	0	0	0.399351	0.192145	0	0	0	0	0	0.398372	0.103963	0.17598	0	0
TCONS_00044393	0.0127667	0	0	0	0	0.016048	0	0	0	0.118799	0	0	3.28278	3.88777	4.71483	2.1758	4.71663	1.90998	3.13135	3.57797	2.08762
TCONS_00044394	0	0	0	0	0	0	0	0	0	0	0	0	0.405059	0.585814	1.65952	0.13987	0	0	0.266851	1.14685	2.72142
TCONS_00044395	0	0.0240712	0.0462472	0	0	0	0	0	0.066005	0	0	0	0.69944	0.872911	0.927782	0.439389	1.65535	1.31849	0.97251	1.60854	1.51932
TCONS_00044404	0	0.0226572	0.00559919	0.00589359	0	0	0	0	0	0	0	0.0278153	0	0	0.371305	0	0	0	0	0	0
TCONS_00044405	0	0	0	0	0	0	0	0	0	0	0	0	0	0	0	0	0	0	0	0	0
TCONS_00044406	0	0	0	0	0	0	0	0	0	0	0	0	0	0.334298	0	0	0	0	0	0	0
TCONS_00044407	0.0179158	0	0.0156632	0	0.0282429	0	0	0	0	0	0	0	0	0	0	0.145443	0	0	0	0	0
TCONS_00044408	0.0286948	0.0046951	0	0.00465832	0.0126953	0	0	0	0	0	0	0	0	0	0	0.268152	0.234979	0	0	0.593229	0
TCONS_00044409	0	0	0.0155895	0	0	0.0109694	0.00497924	0.00508499	0	0.011901	0.0139421	0	0	0.68795	0.706602	0	0	0.412174	1.1353	0	0.788234
TCONS_00044410	0	0	0	0	0.0238888	0	0	0	0	0	0.0172986	0	0	0	0	0.383781	0.755718	0	0	0	0
TCONS_00044411	0.066963	0	0	0	0	0	0	0.0707097	0	0.0217364	0	0	0	1.1282	0.893651	1.29008	0.992385	1.52663	3.02463	0	1.27306
TCONS_00044443	0	0	0	0	0	0	0	0	0	0	0	0	0	0	0	0	0	0	0	0	0
TCONS_00044450	0	0	0	0	0	0	0	0	0	0	0	0	0	0	0	0	0.570129	0	0	0	0
TCONS_00044453	0	0	0	0	0	0	0	0	0	0	0	0	0.393721	0	0.430404	0	1.16638	0	0.593867	0.703529	0
TCONS_00044455	0	0	0	0	0	0	0	0	0	0	0	0	1.02245	0	0	0	0	0.949482	0	0	0
TCONS_00044459	0	0.0618343	0	0	0.0207458	0.0441615	0.0201205	0	0.0162744	0	0	0.0316115	0.37226	0.330299	0	0	0	0	0.254701	0	0.226673
TCONS_00044460	0	0.0316391	0.0414245	0.0414149	0.0463033	0.0437334	0.0414358	0.0128963	0	0.0811986	0	0	0.168038	0.0606697	0.346464	0.139752	0.110996	0.2242	0.0306912	0.0790026	0.0692104
TCONS_00044510	0	0.397039	0	0	0.238512	0	0	0	0	0	0.229053	0	0	0	0	0	0	0	0	0	0
TCONS_00044511	0	0	0	0	0	0	0	0	0	0	0	0	0	0	0	0	0	0	0	0	0
TCONS_00044520	0	0	0	0	0	0	0	0	0	0	0	0	0	0	0	0	0	0	0	0	0
TCONS_00044527	0	0	0	0	0	0.0592791	0	0	0	0	0	0	0	0.0542393	0	0	0	0.66179	0.0621352	0.0585337	0.379114
TCONS_00044530	0	0	0	0	0	0	0	0	0	0	0	0	0	0	0	0	0	0	0	0	0
TCONS_00044531	0	0	0	0	0	0	0	0	0	0	0	0	0	0	0	0.288445	0	0	0	0	0
TCONS_00044573	0	0.0493744	0	0	0	0	0	0	0	0	0	0	0	0	0	0	2.65765	0	0	0	0
TCONS_00044580	0	0	0.0193905	0	0	0	0	0	0	0	0	0	0	0	0	0	0	0	0	0.578812	0
TCONS_00044585	0	0	0	0	0	0	0	0	0	0	0	0	0	0	0	0	0	0	0	0	0
TCONS_00044600	0	0	0	0	0	0	0	0	0	0	0	0	0	0	0	0	0	0	0	0	0
TCONS_00044638	0.132754	0.11644	0.115833	0	0.310581	0.305079	0.0270578	0	0.345523	0	0.0581204	0.0584281	0.142941	0.0859132	0	0.165071	0	0.0796702	0.160069	0.0264545	0.137533
TCONS_00044673	0	0	0.0420918	0	0	0	0	0	0	0	0	0	0	0	0	0	0	0	0	0.10562	0
TCONS_00044674	0	0	0	0	0	0	0	0	0	0	0	0	0	0.572033	0.563459	0	0	0	0.673305	0	0
TCONS_00044687	0	0	0	0	0	0	18.0259	0	0	0	0	0	0	0	0	0	0	0	0	0	0
TCONS_00044688	0	0	0	0	0	0	0	0	0	0	0	0	0	0	0	0	1.06521	0.306998	1.03519	1.47506	0
TCONS_00044689	0	0	0	0	0	0	0	0	0	0	0	0.171951	0	0.522691	0.444567	0	0.947176	0	0	0.92989	0
TCONS_00044690	0	0	0	0	0	0	0	0	0	0	0	0	0	0.449926	0	0	0.340804	0.457862	0	0.855088	0
TCONS_00044691	0	0	0	0	0	0	0	0	0	0	0	0	0	0	0	0	0	0	0	0.206027	0.482072
TCONS_00044693	0	0	0	0	0	0	0	0	0	0	0	0	0.291891	0	0.151667	0	0	0	0.304226	0	0
TCONS_00044695	0	0	0	0	0	0	0	0	0	0	0	0	0	0	0.107119	0	0	0.482255	0	0.221329	0
TCONS_00044696	0	0	0	0	0.0771724	0	0	0	0	0	0.0243751	0.0898278	0	0	0	0	0	0	0	0	0.436478
TCONS_00044697	0	0	0	0	0	0	0	0	0	0	0	0	0.132781	0	0	0.178576	0	0	0	0.16872	0.177374
TCONS_00044698	0	0.00756988	0	0.0233044	0	0.00800263	0	0	0	0	0	0.0100564	0	0.0261434	0	0	0	0	0	0.0442815	0.420556
TCONS_00044719	0	0	0	0	0	0	0	0	0	0	0	0	0	0	0	0	0.489403	0.170658	0	0	0
TCONS_00044720	0	0	0	0	0	0	0	0	0	0	0	0	0	0	0.205095	0	0	0.149615	0.245158	0	0
TCONS_00044875	0	0	0	0	0	0.0677926	0	0	0	0.163554	0	0	0.943162	0.439552	0	0.161793	0.627596	0.391332	0.475874	0.159569	0.306118
[truncated: 18,264 more rows]
