# Supplementary material for: RNA-Seq Implies Divergent Regulation Patterns of LincRNA on Spermatogenesis and Testis Growth in Goats
Source: Animals (Basel). 2021 Feb 26;11(3):625. doi: 10.3390/ani11030625 (PMC7996862; doi:10.3390/ani11030625)
Supplement: Supplementary file 1 [file animals-11-00625-s001.zip › Table S4.xlsx]

## Sheet: Table S4
LincRNA	Log2FoldChange	P-value	Q-value	Expression	Group
TCONS_00000296	2.07892	0.000253443	0.011446	up-regulated	D90 vs. D60
TCONS_00000339	1.8423	0.000847148	0.0244066	up-regulated	D90 vs. D60
TCONS_00002489	-2.56455	0.00202948	0.0440423	down-regulated	D90 vs. D60
TCONS_00002961	-1.23768	1.21194e-07	2.46661e-05	down-regulated	D90 vs. D60
TCONS_00003098	-1.00677	0.000205091	0.00979165	down-regulated	D90 vs. D60
TCONS_00012317	-1.79337	2.80161e-05	0.00246394	down-regulated	D90 vs. D60
TCONS_00017534	-6.03407	0.000368448	0.014659	down-regulated	D90 vs. D60
TCONS_00039325	1.92998	0.000300938	0.0126858	up-regulated	D90 vs. D60
TCONS_00042028	2.61824	3.88402e-05	0.0032425	up-regulated	D90 vs. D60
TCONS_00050002	2.44536	0.00043753	0.016247	up-regulated	D90 vs. D60
TCONS_00062618	1.80706	0.000628545	0.019817	up-regulated	D90 vs. D60
TCONS_00067031	-1.67669	0.00121199	0.0297829	down-regulated	D90 vs. D60
TCONS_00068313	4.14278	4.28393e-07	6.50768e-05	up-regulated	D90 vs. D60
TCONS_00074323	-1.36857	2.42969e-05	0.00225556	down-regulated	D90 vs. D60
TCONS_00078498	-1.58144	0.00030367	0.0126858	down-regulated	D90 vs. D60
TCONS_00080415	-1.57184	0.000406694	0.0154451	down-regulated	D90 vs. D60
TCONS_00090533	-1.08954	4.3307e-08	1.2061e-05	down-regulated	D90 vs. D60
TCONS_00091218	-1.98555	0.000835064	0.0244066	down-regulated	D90 vs. D60
TCONS_00103503	-3.49823	1.79049e-07	2.99191e-05	down-regulated	D90 vs. D60
TCONS_00105630	-1.23098	4.07496e-05	0.0032425	down-regulated	D90 vs. D60
TCONS_00106374	3.96552	0.000114173	0.0073123	up-regulated	D90 vs. D60
TCONS_00108660	-1.10108	0.000236428	0.0109742	down-regulated	D90 vs. D60
TCONS_00114291	-2.66479	0.000754994	0.0233629	down-regulated	D90 vs. D60
TCONS_00114339	-2.38159	0.00082746	0.0244066	down-regulated	D90 vs. D60
TCONS_00117771	-1.97055	0.000187695	0.00938125	down-regulated	D90 vs. D60
TCONS_00122154	2.46231	0.00111204	0.0290346	up-regulated	D90 vs. D60
TCONS_00126039	1.72356	0.0016979	0.0373314	up-regulated	D90 vs. D60
TCONS_00130648	1.06198	0.000332592	0.0135551	up-regulated	D90 vs. D60
TCONS_00135304	3.14316	0.00110122	0.0290346	up-regulated	D90 vs. D60
TCONS_00141140	-6.07396	0.000557475	0.0190617	down-regulated	D90 vs. D60
TCONS_00152463	-1.2309	0.000146515	0.00844231	down-regulated	D90 vs. D60
TCONS_00159926	-2.63063	0.00162585	0.036224	down-regulated	D90 vs. D60
TCONS_00178255	-1.42343	0.000176739	0.00922908	down-regulated	D90 vs. D60
TCONS_00184510	1.08052	0.000167489	0.00902822	up-regulated	D90 vs. D60
TCONS_00192900	3.26123	8.81051e-05	0.00640103	up-regulated	D90 vs. D60
TCONS_00196277	-4.91705	2.41867e-05	0.00225556	down-regulated	D90 vs. D60
TCONS_00202980	-2.046	0.000862937	0.0244401	down-regulated	D90 vs. D60
TCONS_00203520	5.90205	0.00098023	0.0268519	up-regulated	D90 vs. D60
TCONS_00212644	1.57997	0.000290411	0.0126858	up-regulated	D90 vs. D60
TCONS_00220552	1.60218	0.000190881	0.00938125	up-regulated	D90 vs. D60
TCONS_00223181	2.22476	0.000624712	0.019817	up-regulated	D90 vs. D60
TCONS_00224265	-1.2161	0.00084244	0.0244066	down-regulated	D90 vs. D60
TCONS_00224497	-3.6216	0.000543083	0.0190617	down-regulated	D90 vs. D60
TCONS_00230083	-5.21075	0.00120746	0.0297829	down-regulated	D90 vs. D60
TCONS_00234252	-5.92057	0.000589092	0.0196875	down-regulated	D90 vs. D60
TCONS_00237848	1.48702	0.00114351	0.0293969	up-regulated	D90 vs. D60
TCONS_00253015	-1.93329	0.000610659	0.019817	down-regulated	D90 vs. D60
TCONS_00263376	-4.63168	0.00136087	0.0322427	down-regulated	D90 vs. D60
TCONS_00270464	1.43725	0.000118152	0.0073123	up-regulated	D90 vs. D60
TCONS_00283906	-1.57532	0.000558961	0.0190617	down-regulated	D90 vs. D60
TCONS_00287270	-3.09779	0.000925691	0.0257805	down-regulated	D90 vs. D60
TCONS_00296705	-1.48476	1.70193e-05	0.00189595	down-regulated	D90 vs. D60
TCONS_00298081	-5.78881	0.00102318	0.0275764	down-regulated	D90 vs. D60
TCONS_00302201	1.00722	8.82851e-06	0.00105375	up-regulated	D90 vs. D60
TCONS_00309905	-1.51628	2.05139e-05	0.00214242	down-regulated	D90 vs. D60
TCONS_00312194	-1.76576	2.06586e-10	1.15068e-07	down-regulated	D90 vs. D60
TCONS_00321646	-1.35106	1.32851e-07	2.46661e-05	down-regulated	D90 vs. D60
TCONS_00324902	-1.36253	0.000122949	0.00733742	down-regulated	D90 vs. D60
TCONS_00331444	-4.50881	0.000102088	0.00710785	down-regulated	D90 vs. D60
TCONS_00331677	1.80918	0.000401133	0.0154451	up-regulated	D90 vs. D60
TCONS_00341430	3.67759	8.1011e-08	1.93385e-05	up-regulated	D90 vs. D60
TCONS_00341436	3.44978	6.47107e-07	9.01096e-05	up-regulated	D90 vs. D60
TCONS_00352088	-2.01223	1.37551e-17	2.29848e-14	down-regulated	D90 vs. D60
TCONS_00360271	-2.14708	0.00160526	0.036224	down-regulated	D90 vs. D60
TCONS_00360625	7.10874	2.37029e-06	0.000304674	up-regulated	D90 vs. D60
TCONS_00366139	2.7441	4.28473e-05	0.00325445	up-regulated	D90 vs. D60
TCONS_00366535	2.70024	2.23321e-09	9.32923e-07	up-regulated	D90 vs. D60
TCONS_00366553	2.59123	0.00121016	0.0297829	up-regulated	D90 vs. D60
TCONS_00367984	2.49385	3.18724e-09	1.06518e-06	up-regulated	D90 vs. D60
TCONS_00376035	-3.55343	1.68792e-10	1.15068e-07	down-regulated	D90 vs. D60
TCONS_00376338	6.06216	0.000541984	0.0190617	up-regulated	D90 vs. D60
TCONS_00000241	5.36843	3.07278e-25	6.95643e-23	up-regulated	D120 vs. D90
TCONS_00000242	6.63898	2.5589e-05	0.000219066	up-regulated	D120 vs. D90
TCONS_00000339	2.76364	5.25817e-11	1.72799e-09	up-regulated	D120 vs. D90
TCONS_00000772	6.216	0.000236527	0.00145377	up-regulated	D120 vs. D90
TCONS_00000807	5.8052	0.00147878	0.00689479	up-regulated	D120 vs. D90
TCONS_00001441	6.85028	7.51157e-06	7.48402e-05	up-regulated	D120 vs. D90
TCONS_00001937	5.19873	0.0111927	0.035004	up-regulated	D120 vs. D90
TCONS_00001996	4.62508	0.0106716	0.0337891	up-regulated	D120 vs. D90
TCONS_00002643	4.09528	0.0134436	0.0400165	up-regulated	D120 vs. D90
TCONS_00002645	5.41857	0.00631796	0.0222137	up-regulated	D120 vs. D90
TCONS_00002878	7.5124	1.68066e-07	2.58441e-06	up-regulated	D120 vs. D90
TCONS_00003098	-1.40007	8.36721e-05	0.000610009	down-regulated	D120 vs. D90
TCONS_00003187	6.35119	0.000148554	0.000970125	up-regulated	D120 vs. D90
TCONS_00003303	5.32656	0.00816392	0.0271575	up-regulated	D120 vs. D90
TCONS_00003455	5.06635	0.0174362	0.0487663	up-regulated	D120 vs. D90
TCONS_00003665	8.57334	9.11083e-33	3.37515e-30	up-regulated	D120 vs. D90
TCONS_00003756	4.9142	0.00517538	0.0190684	up-regulated	D120 vs. D90
TCONS_00004090	6.89883	4.62036e-08	8.18606e-07	up-regulated	D120 vs. D90
TCONS_00004212	5.18575	0.0127212	0.0382011	up-regulated	D120 vs. D90
TCONS_00004589	2.59527	0.00337475	0.013643	up-regulated	D120 vs. D90
TCONS_00004953	5.04849	0.0169919	0.0480498	up-regulated	D120 vs. D90
TCONS_00005605	5.99473	0.000713044	0.00371567	up-regulated	D120 vs. D90
TCONS_00005606	5.68231	0.00261286	0.0109994	up-regulated	D120 vs. D90
TCONS_00006161	5.20455	0.0114025	0.0354318	up-regulated	D120 vs. D90
TCONS_00006206	6.3203	0.000130318	0.000870567	up-regulated	D120 vs. D90
TCONS_00006208	5.4324	0.00612208	0.0217313	up-regulated	D120 vs. D90
TCONS_00006625	4.51974	0.0144612	0.0422644	up-regulated	D120 vs. D90
TCONS_00007405	1.79938	0.00819599	0.027242	up-regulated	D120 vs. D90
TCONS_00007663	8.74419	2.06371e-11	7.24967e-10	up-regulated	D120 vs. D90
TCONS_00007726	6.11464	0.00034963	0.00202083	up-regulated	D120 vs. D90
TCONS_00007824	6.21024	0.000240889	0.00147613	up-regulated	D120 vs. D90
TCONS_00007926	4.20458	0.00960226	0.0310057	up-regulated	D120 vs. D90
TCONS_00008320	4.89079	3.64199e-38	2.47352e-35	up-regulated	D120 vs. D90
TCONS_00008411	5.85381	0.00010275	0.000710876	up-regulated	D120 vs. D90
TCONS_00008767	-2.89197	6.37998e-07	8.49621e-06	down-regulated	D120 vs. D90
TCONS_00009004	4.95726	4.43906e-09	9.69768e-08	up-regulated	D120 vs. D90
TCONS_00009078	5.97767	0.000604939	0.0032266	up-regulated	D120 vs. D90
TCONS_00009219	-2.51639	0.000103791	0.000715978	down-regulated	D120 vs. D90
TCONS_00009282	5.2457	0.0100098	0.0320189	up-regulated	D120 vs. D90
TCONS_00009353	6.70451	2.77935e-05	0.000234005	up-regulated	D120 vs. D90
TCONS_00009377	5.11431	0.0152011	0.0438403	up-regulated	D120 vs. D90
TCONS_00009892	2.82416	0.00901731	0.0294908	up-regulated	D120 vs. D90
TCONS_00010022	7.00835	2.72993e-06	3.0478e-05	up-regulated	D120 vs. D90
TCONS_00010408	6.06531	0.000733427	0.00381213	up-regulated	D120 vs. D90
TCONS_00010532	5.95233	0.000832446	0.00423433	up-regulated	D120 vs. D90
TCONS_00010677	1.67464	8.7789e-05	0.000632319	up-regulated	D120 vs. D90
TCONS_00011482	5.19162	0.011675	0.0359877	up-regulated	D120 vs. D90
TCONS_00011875	-1.99961	0.00615662	0.0218322	down-regulated	D120 vs. D90
TCONS_00011945	7.23662	9.53264e-07	1.21773e-05	up-regulated	D120 vs. D90
TCONS_00012317	-1.48584	0.0175732	0.0491158	down-regulated	D120 vs. D90
TCONS_00012411	5.35715	0.0162073	0.0462821	up-regulated	D120 vs. D90
TCONS_00012489	7.20615	1.04163e-06	1.32645e-05	up-regulated	D120 vs. D90
TCONS_00012946	3.4721	2.2333e-15	1.46786e-13	up-regulated	D120 vs. D90
TCONS_00013216	4.04981	0.00368559	0.0146367	up-regulated	D120 vs. D90
TCONS_00013364	6.08529	0.000390335	0.00219395	up-regulated	D120 vs. D90
TCONS_00013456	7.08937	3.09134e-06	3.37726e-05	up-regulated	D120 vs. D90
TCONS_00014921	-1.91667	3.49871e-09	7.87694e-08	down-regulated	D120 vs. D90
TCONS_00014930	-1.51349	0.0036888	0.0146367	down-regulated	D120 vs. D90
TCONS_00015084	10.5154	1.5592e-17	1.3237e-15	up-regulated	D120 vs. D90
TCONS_00015272	6.02838	0.000619489	0.00328273	up-regulated	D120 vs. D90
TCONS_00015884	5.9349	0.000816996	0.00416678	up-regulated	D120 vs. D90
TCONS_00016030	5.29943	0.00113471	0.00554428	up-regulated	D120 vs. D90
TCONS_00016033	8.10001	1.85997e-09	4.53855e-08	up-regulated	D120 vs. D90
TCONS_00016126	3.41991	0.000243338	0.00148666	up-regulated	D120 vs. D90
TCONS_00016221	7.706	2.87195e-08	5.31964e-07	up-regulated	D120 vs. D90
TCONS_00016877	5.05208	0.0166489	0.0473443	up-regulated	D120 vs. D90
TCONS_00016891	4.7338	0.00160337	0.00737443	up-regulated	D120 vs. D90
TCONS_00017055	3.80613	0.00163441	0.00749179	up-regulated	D120 vs. D90
TCONS_00017655	4.80299	0.008803	0.0288826	up-regulated	D120 vs. D90
TCONS_00018408	-2.02702	0.0087245	0.0286481	down-regulated	D120 vs. D90
TCONS_00018952	1.63207	0.000919591	0.00460853	up-regulated	D120 vs. D90
TCONS_00018999	3.79506	0.000354111	0.00203527	up-regulated	D120 vs. D90
TCONS_00019255	6.79554	1.12215e-06	1.41572e-05	up-regulated	D120 vs. D90
TCONS_00019481	4.0201	1.31294e-06	1.63615e-05	up-regulated	D120 vs. D90
TCONS_00019766	6.69119	6.28874e-05	0.000472816	up-regulated	D120 vs. D90
TCONS_00019894	4.69948	0.0119608	0.0364277	up-regulated	D120 vs. D90
TCONS_00020100	6.03131	0.000590938	0.00316616	up-regulated	D120 vs. D90
TCONS_00020107	6.78093	1.16245e-05	0.000109652	up-regulated	D120 vs. D90
TCONS_00020136	2.65224	0.000353194	0.00203286	up-regulated	D120 vs. D90
TCONS_00020152	6.47291	8.7708e-05	0.000632319	up-regulated	D120 vs. D90
TCONS_00020313	2.8949	0.00514439	0.0189886	up-regulated	D120 vs. D90
TCONS_00020369	-1.13165	3.07557e-05	0.000254735	down-regulated	D120 vs. D90
TCONS_00020523	7.43808	1.96489e-07	2.97656e-06	up-regulated	D120 vs. D90
TCONS_00020709	5.3609	2.65894e-08	4.94757e-07	up-regulated	D120 vs. D90
TCONS_00020942	3.18491	0.000380866	0.00214665	up-regulated	D120 vs. D90
TCONS_00021049	4.04131	2.8939e-20	3.80408e-18	up-regulated	D120 vs. D90
TCONS_00021152	2.50468	0.0025586	0.0107933	up-regulated	D120 vs. D90
TCONS_00021439	4.43735	6.82926e-05	0.000511567	up-regulated	D120 vs. D90
TCONS_00022036	5.81667	0.00141053	0.00664905	up-regulated	D120 vs. D90
TCONS_00022186	4.90313	4.62988e-06	4.86257e-05	up-regulated	D120 vs. D90
TCONS_00024879	6.28728	2.20297e-10	6.45836e-09	up-regulated	D120 vs. D90
TCONS_00025097	4.25476	0.00965728	0.0311094	up-regulated	D120 vs. D90
TCONS_00025391	4.67457	8.20307e-14	4.34124e-12	up-regulated	D120 vs. D90
TCONS_00025521	5.43295	0.00528674	0.0192844	up-regulated	D120 vs. D90
TCONS_00025536	5.73197	1.21747e-05	0.000114051	up-regulated	D120 vs. D90
TCONS_00026137	5.76694	0.00202838	0.00898439	up-regulated	D120 vs. D90
TCONS_00026138	4.93117	6.98119e-09	1.48169e-07	up-regulated	D120 vs. D90
TCONS_00026155	-5.19993	0.013657	0.0405492	down-regulated	D120 vs. D90
TCONS_00026542	5.55248	0.00375891	0.0148651	up-regulated	D120 vs. D90
TCONS_00026807	5.08233	0.00404252	0.0158093	up-regulated	D120 vs. D90
TCONS_00027413	3.20038	7.62666e-19	8.18402e-17	up-regulated	D120 vs. D90
TCONS_00027418	7.07446	1.55346e-42	1.58259e-39	up-regulated	D120 vs. D90
TCONS_00027511	-1.37247	0.00171615	0.00778766	down-regulated	D120 vs. D90
TCONS_00027796	6.47591	5.89495e-05	0.000446904	up-regulated	D120 vs. D90
TCONS_00028383	-2.03442	0.000519212	0.0028286	down-regulated	D120 vs. D90
TCONS_00028568	6.06342	4.19674e-05	0.000333367	up-regulated	D120 vs. D90
TCONS_00029100	5.83472	0.00140583	0.00664589	up-regulated	D120 vs. D90
TCONS_00029160	5.56578	0.00478981	0.0180589	up-regulated	D120 vs. D90
TCONS_00029287	2.53095	0.00857792	0.0283266	up-regulated	D120 vs. D90
TCONS_00029472	3.74618	0.00750305	0.0254791	up-regulated	D120 vs. D90
TCONS_00029537	5.28489	0.0111835	0.035004	up-regulated	D120 vs. D90
TCONS_00029801	3.80684	0.00066376	0.00347651	up-regulated	D120 vs. D90
TCONS_00030346	4.29476	6.67321e-08	1.15226e-06	up-regulated	D120 vs. D90
TCONS_00030645	4.61	3.63023e-10	1.02022e-08	up-regulated	D120 vs. D90
TCONS_00030702	2.97127	2.53162e-08	4.75408e-07	up-regulated	D120 vs. D90
TCONS_00031526	6.09191	0.000376455	0.00213063	up-regulated	D120 vs. D90
TCONS_00031888	-1.59631	0.00308222	0.0126105	down-regulated	D120 vs. D90
TCONS_00031947	-1.08641	0.00571254	0.0204737	down-regulated	D120 vs. D90
TCONS_00032069	-2.20816	0.0120082	0.0365362	down-regulated	D120 vs. D90
TCONS_00032505	5.55553	0.000525472	0.00285506	up-regulated	D120 vs. D90
TCONS_00032704	4.53547	1.43673e-05	0.000131862	up-regulated	D120 vs. D90
TCONS_00033113	4.30763	1.08667e-07	1.80743e-06	up-regulated	D120 vs. D90
TCONS_00033425	2.12048	3.05562e-05	0.000253598	up-regulated	D120 vs. D90
TCONS_00033574	6.25817	0.000167818	0.00107525	up-regulated	D120 vs. D90
TCONS_00033684	5.90917	0.000961983	0.00478642	up-regulated	D120 vs. D90
TCONS_00034054	5.11412	0.00305696	0.0125323	up-regulated	D120 vs. D90
TCONS_00034065	8.06209	3.01301e-09	6.97613e-08	up-regulated	D120 vs. D90
TCONS_00034391	3.47463	2.12185e-17	1.7646e-15	up-regulated	D120 vs. D90
TCONS_00034550	-1.24359	0.00651252	0.0227994	down-regulated	D120 vs. D90
TCONS_00034759	5.74427	0.00205071	0.00905378	up-regulated	D120 vs. D90
TCONS_00034837	8.52221	1.03818e-10	3.20498e-09	up-regulated	D120 vs. D90
TCONS_00035696	6.6024	5.52316e-08	9.6596e-07	up-regulated	D120 vs. D90
TCONS_00035761	5.38914	0.0159026	0.0455718	up-regulated	D120 vs. D90
TCONS_00035803	8.18811	1.1031e-09	2.82713e-08	up-regulated	D120 vs. D90
TCONS_00035804	5.06561	0.0167417	0.0474756	up-regulated	D120 vs. D90
TCONS_00035925	3.59503	1.41917e-18	1.44578e-16	up-regulated	D120 vs. D90
TCONS_00036415	-1.67532	0.00888889	0.0290941	down-regulated	D120 vs. D90
TCONS_00036723	-1.08809	0.0166104	0.0473007	down-regulated	D120 vs. D90
TCONS_00037562	6.60777	5.70243e-05	0.000435974	up-regulated	D120 vs. D90
TCONS_00037565	5.9071	0.00155316	0.00719218	up-regulated	D120 vs. D90
TCONS_00038126	5.59673	0.00294577	0.0121498	up-regulated	D120 vs. D90
TCONS_00038244	9.03793	1.70029e-12	7.69854e-11	up-regulated	D120 vs. D90
TCONS_00038257	5.40052	0.00773815	0.0260818	up-regulated	D120 vs. D90
TCONS_00038342	5.73671	0.00188734	0.00847952	up-regulated	D120 vs. D90
TCONS_00038872	4.14039	0.00243688	0.0103982	up-regulated	D120 vs. D90
TCONS_00040333	4.06245	0.016035	0.0458544	up-regulated	D120 vs. D90
TCONS_00040374	3.27908	0.00625503	0.0220667	up-regulated	D120 vs. D90
TCONS_00040557	-1.9278	0.0170951	0.0481737	down-regulated	D120 vs. D90
TCONS_00040742	2.32265	2.37205e-05	0.0002061	up-regulated	D120 vs. D90
TCONS_00040798	5.77525	5.43738e-06	5.62369e-05	up-regulated	D120 vs. D90
TCONS_00041527	5.53259	0.00456697	0.0174418	up-regulated	D120 vs. D90
TCONS_00041807	7.46548	1.46673e-07	2.32565e-06	up-regulated	D120 vs. D90
TCONS_00042028	-1.37126	0.0123033	0.0371102	down-regulated	D120 vs. D90
TCONS_00042257	-1.70402	0.00386249	0.0151781	down-regulated	D120 vs. D90
TCONS_00043010	7.79238	4.15189e-31	1.30146e-28	up-regulated	D120 vs. D90
TCONS_00043078	1.48448	0.0087057	0.0286095	up-regulated	D120 vs. D90
TCONS_00043106	4.49194	0.00221366	0.00964776	up-regulated	D120 vs. D90
TCONS_00043808	7.12922	1.6812e-06	2.01394e-05	up-regulated	D120 vs. D90
TCONS_00043809	5.35974	0.0070198	0.0242363	up-regulated	D120 vs. D90
TCONS_00043833	5.19873	0.0111927	0.035004	up-regulated	D120 vs. D90
TCONS_00043930	6.22401	0.000206866	0.00129116	up-regulated	D120 vs. D90
TCONS_00043970	2.10208	0.00594026	0.0212152	up-regulated	D120 vs. D90
TCONS_00044012	2.71871	0.0151894	0.0438403	up-regulated	D120 vs. D90
TCONS_00044367	2.48308	7.17622e-06	7.23839e-05	up-regulated	D120 vs. D90
TCONS_00044368	4.15557	1.26465e-05	0.000117391	up-regulated	D120 vs. D90
TCONS_00044394	5.26992	0.00947767	0.0307007	up-regulated	D120 vs. D90
TCONS_00044395	7.44526	1.62953e-07	2.53449e-06	up-regulated	D120 vs. D90
TCONS_00044407	5.37816	0.00622629	0.0219862	up-regulated	D120 vs. D90
TCONS_00044411	7.61722	5.27403e-09	1.13114e-07	up-regulated	D120 vs. D90
TCONS_00044459	1.28996	0.0178847	0.049918	up-regulated	D120 vs. D90
TCONS_00045345	5.50054	0.00444394	0.0171001	up-regulated	D120 vs. D90
TCONS_00045396	7.04651	2.14938e-06	2.47422e-05	up-regulated	D120 vs. D90
TCONS_00045448	7.47032	1.53916e-08	3.0447e-07	up-regulated	D120 vs. D90
TCONS_00045517	5.66636	0.00322637	0.0131081	up-regulated	D120 vs. D90
TCONS_00046359	7.51983	1.26459e-07	2.03684e-06	up-regulated	D120 vs. D90
TCONS_00046856	2.98217	0.00570213	0.0204544	up-regulated	D120 vs. D90
TCONS_00046977	5.4324	0.00612208	0.0217313	up-regulated	D120 vs. D90
TCONS_00047096	-2.81108	0.0118958	0.0363111	down-regulated	D120 vs. D90
TCONS_00047341	5.52848	0.0041676	0.0162516	up-regulated	D120 vs. D90
TCONS_00047418	4.0388	3.45895e-35	1.40952e-32	up-regulated	D120 vs. D90
TCONS_00047473	-2.2391	0.000288197	0.00170698	down-regulated	D120 vs. D90
TCONS_00048017	6.04092	0.000553776	0.00298893	up-regulated	D120 vs. D90
TCONS_00048173	5.79487	0.00170394	0.0077495	up-regulated	D120 vs. D90
TCONS_00048236	5.10673	0.0149646	0.0434335	up-regulated	D120 vs. D90
TCONS_00048414	-2.08907	3.16708e-07	4.52836e-06	down-regulated	D120 vs. D90
TCONS_00048554	6.83398	1.18632e-05	0.000111388	up-regulated	D120 vs. D90
TCONS_00048622	-2.25845	0.000293841	0.00173035	down-regulated	D120 vs. D90
TCONS_00048637	7.0332	2.32916e-06	2.64383e-05	up-regulated	D120 vs. D90
TCONS_00048660	5.41183	0.007114	0.0245051	up-regulated	D120 vs. D90
TCONS_00048678	5.51443	0.00479704	0.0180644	up-regulated	D120 vs. D90
TCONS_00048965	4.79316	8.04138e-05	0.00059362	up-regulated	D120 vs. D90
TCONS_00049327	4.87024	5.67842e-05	0.000434954	up-regulated	D120 vs. D90
TCONS_00049991	3.45015	0.0175883	0.0491243	up-regulated	D120 vs. D90
TCONS_00050002	-2.05342	0.00317665	0.0129319	down-regulated	D120 vs. D90
TCONS_00050166	5.19162	0.011675	0.0359877	up-regulated	D120 vs. D90
TCONS_00050378	3.00969	0.00813391	0.0270798	up-regulated	D120 vs. D90
TCONS_00051064	1.68867	0.00518534	0.0190798	up-regulated	D120 vs. D90
TCONS_00051209	5.00572	0.00338014	0.0136466	up-regulated	D120 vs. D90
TCONS_00051806	5.28359	0.0117958	0.0362503	up-regulated	D120 vs. D90
TCONS_00051809	7.08966	2.57734e-06	2.90129e-05	up-regulated	D120 vs. D90
TCONS_00052065	5.20779	0.011838	0.0363111	up-regulated	D120 vs. D90
TCONS_00052217	3.04514	0.0119542	0.0364277	up-regulated	D120 vs. D90
TCONS_00052310	5.41804	0.0056983	0.0204544	up-regulated	D120 vs. D90
TCONS_00052634	7.39069	2.8846e-07	4.16835e-06	up-regulated	D120 vs. D90
TCONS_00052974	7.06859	2.75607e-06	3.06857e-05	up-regulated	D120 vs. D90
TCONS_00053364	7.64238	9.29529e-12	3.60746e-10	up-regulated	D120 vs. D90
TCONS_00053488	3.01143	0.00255629	0.0107933	up-regulated	D120 vs. D90
TCONS_00053737	5.45506	0.00616124	0.0218322	up-regulated	D120 vs. D90
TCONS_00053864	2.28204	0.000266475	0.00160872	up-regulated	D120 vs. D90
TCONS_00054379	-3.21973	0.000287426	0.00170698	down-regulated	D120 vs. D90
TCONS_00054715	5.2613	0.0129794	0.0389191	up-regulated	D120 vs. D90
TCONS_00054816	5.26066	0.00964021	0.031079	up-regulated	D120 vs. D90
TCONS_00054860	8.81837	1.19175e-11	4.4554e-10	up-regulated	D120 vs. D90
TCONS_00054861	7.50935	1.49031e-07	2.3448e-06	up-regulated	D120 vs. D90
TCONS_00054937	4.08347	0.00376096	0.0148651	up-regulated	D120 vs. D90
TCONS_00054944	5.57095	0.00349004	0.0139842	up-regulated	D120 vs. D90
TCONS_00054962	5.4953	0.0045818	0.0174821	up-regulated	D120 vs. D90
TCONS_00055509	5.96934	0.000741795	0.00384582	up-regulated	D120 vs. D90
TCONS_00055573	5.72054	0.00201938	0.00896402	up-regulated	D120 vs. D90
TCONS_00055577	5.82977	0.00166131	0.00759804	up-regulated	D120 vs. D90
TCONS_00055708	3.1294	3.42326e-19	4.10288e-17	up-regulated	D120 vs. D90
TCONS_00055709	2.77949	1.68097e-06	2.01394e-05	up-regulated	D120 vs. D90
TCONS_00056340	3.92101	0.00198616	0.0088489	up-regulated	D120 vs. D90
TCONS_00056557	5.04346	0.0173458	0.0486137	up-regulated	D120 vs. D90
TCONS_00056628	5.80265	0.00139876	0.00662016	up-regulated	D120 vs. D90
TCONS_00057038	1.931	8.98741e-10	2.36282e-08	up-regulated	D120 vs. D90
TCONS_00057048	6.24476	0.000361905	0.00206839	up-regulated	D120 vs. D90
TCONS_00057049	5.7943	0.00164325	0.00752387	up-regulated	D120 vs. D90
TCONS_00057211	6.903	5.13707e-06	5.36758e-05	up-regulated	D120 vs. D90
TCONS_00057652	4.62016	0.0114077	0.0354318	up-regulated	D120 vs. D90
TCONS_00057759	3.27796	0.00977882	0.0314264	up-regulated	D120 vs. D90
TCONS_00058059	6.40219	9.8473e-05	0.000686885	up-regulated	D120 vs. D90
TCONS_00058230	4.87407	4.48574e-05	0.000352884	up-regulated	D120 vs. D90
TCONS_00058515	2.18809	1.26406e-07	2.03684e-06	up-regulated	D120 vs. D90
TCONS_00058781	2.16446	0.0167545	0.047479	up-regulated	D120 vs. D90
TCONS_00059363	6.55306	4.67682e-05	0.000366501	up-regulated	D120 vs. D90
TCONS_00059710	7.1302	1.36444e-06	1.68999e-05	up-regulated	D120 vs. D90
TCONS_00059849	6.13039	0.000492951	0.00269997	up-regulated	D120 vs. D90
TCONS_00060365	7.33007	4.02616e-07	5.6187e-06	up-regulated	D120 vs. D90
TCONS_00061156	5.76428	6.35596e-06	6.45899e-05	up-regulated	D120 vs. D90
TCONS_00061302	5.12725	0.0141797	0.0417502	up-regulated	D120 vs. D90
TCONS_00061419	6.23806	5.17888e-31	1.50742e-28	up-regulated	D120 vs. D90
TCONS_00061722	5.57815	1.29624e-16	9.78183e-15	up-regulated	D120 vs. D90
TCONS_00061862	5.27178	0.013774	0.040821	up-regulated	D120 vs. D90
TCONS_00062209	5.30205	0.00847612	0.0280131	up-regulated	D120 vs. D90
TCONS_00062314	-1.61617	0.00278029	0.0115727	down-regulated	D120 vs. D90
TCONS_00062354	5.90464	0.000350111	0.00202083	up-regulated	D120 vs. D90
TCONS_00062594	6.96616	1.59841e-48	2.17118e-45	up-regulated	D120 vs. D90
TCONS_00062618	-3.10997	6.97071e-06	7.04854e-05	down-regulated	D120 vs. D90
TCONS_00062680	3.8698	9.83927e-06	9.52376e-05	up-regulated	D120 vs. D90
TCONS_00062753	4.65687	0.0107431	0.0338842	up-regulated	D120 vs. D90
TCONS_00062770	5.38408	0.000785415	0.00401577	up-regulated	D120 vs. D90
TCONS_00063136	2.97944	0.00342534	0.0137797	up-regulated	D120 vs. D90
TCONS_00063138	5.46272	0.00529553	0.0192844	up-regulated	D120 vs. D90
TCONS_00063235	3.44735	0.0012718	0.00614051	up-regulated	D120 vs. D90
TCONS_00063333	3.74186	0.00201917	0.00896402	up-regulated	D120 vs. D90
TCONS_00063352	2.51199	0.0172661	0.0484959	up-regulated	D120 vs. D90
TCONS_00063555	5.89677	0.00128108	0.00616341	up-regulated	D120 vs. D90
TCONS_00063567	4.84936	0.00125354	0.00605954	up-regulated	D120 vs. D90
TCONS_00064134	2.42872	0.000326567	0.00189837	up-regulated	D120 vs. D90
TCONS_00064231	1.46798	0.000137845	0.00091188	up-regulated	D120 vs. D90
TCONS_00064276	6.02914	0.000612203	0.00325682	up-regulated	D120 vs. D90
TCONS_00064364	4.90988	6.27553e-06	6.39319e-05	up-regulated	D120 vs. D90
TCONS_00065006	4.24389	0.00936845	0.030468	up-regulated	D120 vs. D90
TCONS_00065404	7.16244	2.41186e-82	9.82834e-79	up-regulated	D120 vs. D90
TCONS_00065581	5.18575	0.0127212	0.0382011	up-regulated	D120 vs. D90
TCONS_00065669	7.59879	8.46406e-08	1.43713e-06	up-regulated	D120 vs. D90
TCONS_00066099	7.70964	3.07094e-08	5.61169e-07	up-regulated	D120 vs. D90
TCONS_00066105	9.01293	2.47081e-12	1.09441e-10	up-regulated	D120 vs. D90
TCONS_00066217	5.11907	0.0149834	0.0434571	up-regulated	D120 vs. D90
TCONS_00066234	6.7784	5.99041e-05	0.000452893	up-regulated	D120 vs. D90
TCONS_00066370	5.38848	0.00731368	0.0250447	up-regulated	D120 vs. D90
TCONS_00066434	3.91463	6.87844e-07	9.07108e-06	up-regulated	D120 vs. D90
TCONS_00066504	-1.88264	7.3635e-10	1.9741e-08	down-regulated	D120 vs. D90
TCONS_00066509	-2.46268	2.90988e-06	3.2048e-05	down-regulated	D120 vs. D90
TCONS_00066659	3.45532	0.00649658	0.0227632	up-regulated	D120 vs. D90
TCONS_00066790	4.63244	1.03412e-05	9.91539e-05	up-regulated	D120 vs. D90
TCONS_00066808	2.01806	0.00679004	0.0236289	up-regulated	D120 vs. D90
TCONS_00066874	5.66776	0.0086389	0.0284382	up-regulated	D120 vs. D90
TCONS_00067031	6.02972	6.61685e-74	1.34818e-70	up-regulated	D120 vs. D90
TCONS_00067325	5.79575	0.00169981	0.00774789	up-regulated	D120 vs. D90
TCONS_00067760	5.43351	0.00510989	0.0189126	up-regulated	D120 vs. D90
TCONS_00068309	1.15085	5.42505e-05	0.000417903	up-regulated	D120 vs. D90
TCONS_00068313	2.15473	1.06575e-05	0.000101708	up-regulated	D120 vs. D90
TCONS_00068455	5.52847	0.00384943	0.015156	up-regulated	D120 vs. D90
TCONS_00068692	6.62619	3.65852e-05	0.000296981	up-regulated	D120 vs. D90
TCONS_00068785	-2.47219	5.57261e-13	2.67157e-11	down-regulated	D120 vs. D90
TCONS_00068798	-1.78668	8.72505e-06	8.52628e-05	down-regulated	D120 vs. D90
TCONS_00068896	6.31431	0.000445677	0.00246757	up-regulated	D120 vs. D90
TCONS_00068975	5.56353	5.9738e-36	2.70481e-33	up-regulated	D120 vs. D90
TCONS_00068976	7.65065	1.11416e-11	4.25466e-10	up-regulated	D120 vs. D90
TCONS_00069038	5.37187	0.00667766	0.0232975	up-regulated	D120 vs. D90
TCONS_00069039	7.17863	1.23678e-06	1.55552e-05	up-regulated	D120 vs. D90
TCONS_00069047	7.52067	7.81936e-11	2.48937e-09	up-regulated	D120 vs. D90
TCONS_00069213	6.22783	0.000211023	0.00131085	up-regulated	D120 vs. D90
TCONS_00069244	5.62065	0.00805839	0.0268943	up-regulated	D120 vs. D90
TCONS_00069246	10.2131	1.90758e-16	1.41335e-14	up-regulated	D120 vs. D90
TCONS_00069338	5.31761	0.00864661	0.0284382	up-regulated	D120 vs. D90
TCONS_00069481	7.01109	7.23438e-06	7.27903e-05	up-regulated	D120 vs. D90
TCONS_00069717	5.60069	0.00453414	0.0173489	up-regulated	D120 vs. D90
TCONS_00070162	4.47878	0.0171871	0.048335	up-regulated	D120 vs. D90
TCONS_00070344	5.20266	0.0124465	0.0375143	up-regulated	D120 vs. D90
TCONS_00071178	5.06561	0.0167417	0.0474756	up-regulated	D120 vs. D90
TCONS_00071337	6.07281	0.000546418	0.00296098	up-regulated	D120 vs. D90
TCONS_00071619	6.58659	3.13595e-21	4.73296e-19	up-regulated	D120 vs. D90
TCONS_00071664	2.86299	0.0113319	0.035277	up-regulated	D120 vs. D90
TCONS_00071922	6.71201	2.64244e-05	0.000224801	up-regulated	D120 vs. D90
TCONS_00072060	7.18688	1.63606e-06	1.97247e-05	up-regulated	D120 vs. D90
TCONS_00072073	6.08207	0.000563818	0.0030391	up-regulated	D120 vs. D90
TCONS_00072412	7.0613	2.13966e-06	2.47e-05	up-regulated	D120 vs. D90
TCONS_00072561	5.48795	0.0077766	0.0261466	up-regulated	D120 vs. D90
TCONS_00072602	4.87505	0.00756396	0.0256646	up-regulated	D120 vs. D90
TCONS_00072606	5.12999	0.0136623	0.0405492	up-regulated	D120 vs. D90
TCONS_00072631	3.95197	1.52423e-05	0.000138335	up-regulated	D120 vs. D90
TCONS_00072761	-3.78063	4.33225e-06	4.59737e-05	down-regulated	D120 vs. D90
TCONS_00073025	6.86849	4.29468e-09	9.45989e-08	up-regulated	D120 vs. D90
TCONS_00073036	2.60399	2.44502e-05	0.00021109	up-regulated	D120 vs. D90
TCONS_00073045	6.1098	0.00037582	0.00212999	up-regulated	D120 vs. D90
TCONS_00073368	5.23038	0.0141613	0.0417263	up-regulated	D120 vs. D90
TCONS_00073489	4.06721	0.00497234	0.0184538	up-regulated	D120 vs. D90
TCONS_00073763	6.31527	0.000229614	0.00141984	up-regulated	D120 vs. D90
TCONS_00074028	5.93179	0.000784413	0.00401568	up-regulated	D120 vs. D90
TCONS_00074272	6.08282	0.000594893	0.00318135	up-regulated	D120 vs. D90
TCONS_00074286	6.06316	0.000449641	0.00248614	up-regulated	D120 vs. D90
TCONS_00074647	7.49272	1.24153e-07	2.03182e-06	up-regulated	D120 vs. D90
TCONS_00074648	5.32464	3.47146e-06	3.75231e-05	up-regulated	D120 vs. D90
TCONS_00075011	5.22788	0.000118588	0.00080541	up-regulated	D120 vs. D90
TCONS_00075053	-2.22677	0.014317	0.0419725	down-regulated	D120 vs. D90
TCONS_00075509	5.47134	0.00535881	0.0194627	up-regulated	D120 vs. D90
TCONS_00075749	5.64541	0.00268869	0.0112724	up-regulated	D120 vs. D90
TCONS_00076127	1.92447	0.0162268	0.0462981	up-regulated	D120 vs. D90
TCONS_00076764	5.7474	0.00210928	0.00924872	up-regulated	D120 vs. D90
TCONS_00077065	5.80989	0.00127997	0.00616341	up-regulated	D120 vs. D90
TCONS_00077102	7.23022	7.89613e-07	1.02148e-05	up-regulated	D120 vs. D90
TCONS_00077203	6.03687	0.000631565	0.00334237	up-regulated	D120 vs. D90
TCONS_00077212	3.37181	0.0106289	0.0336802	up-regulated	D120 vs. D90
TCONS_00077254	-1.79572	0.000128994	0.000864559	down-regulated	D120 vs. D90
TCONS_00077344	5.65535	0.00268646	0.0112724	up-regulated	D120 vs. D90
TCONS_00077346	5.27239	0.0097506	0.0313604	up-regulated	D120 vs. D90
TCONS_00077355	6.16679	0.000321194	0.00186981	up-regulated	D120 vs. D90
TCONS_00077464	5.60264	0.00335981	0.0136092	up-regulated	D120 vs. D90
TCONS_00077511	4.68023	0.0122989	0.0371102	up-regulated	D120 vs. D90
TCONS_00077514	3.41095	0.000233282	0.00143816	up-regulated	D120 vs. D90
TCONS_00077616	5.7295	0.000198201	0.00125026	up-regulated	D120 vs. D90
TCONS_00077644	3.49778	0.000242143	0.00148158	up-regulated	D120 vs. D90
TCONS_00077671	3.20804	0.00145388	0.0067942	up-regulated	D120 vs. D90
TCONS_00077726	7.6678	4.21e-09	9.32378e-08	up-regulated	D120 vs. D90
TCONS_00079358	6.90021	5.21135e-06	5.41741e-05	up-regulated	D120 vs. D90
TCONS_00079713	4.9775	0.0119375	0.0364112	up-regulated	D120 vs. D90
TCONS_00079720	5.7617	0.00205941	0.00908237	up-regulated	D120 vs. D90
TCONS_00079882	7.83582	1.5962e-09	3.96617e-08	up-regulated	D120 vs. D90
TCONS_00080147	4.0029	0.00109897	0.00538259	up-regulated	D120 vs. D90
TCONS_00080149	6.71425	5.92138e-12	2.41296e-10	up-regulated	D120 vs. D90
TCONS_00080415	-2.03346	0.00600643	0.021414	down-regulated	D120 vs. D90
TCONS_00080677	4.28126	0.00733415	0.0250937	up-regulated	D120 vs. D90
TCONS_00080879	-1.29719	5.92936e-06	6.08618e-05	down-regulated	D120 vs. D90
TCONS_00081488	5.50398	0.000520618	0.00283247	up-regulated	D120 vs. D90
TCONS_00081491	5.63727	0.00253295	0.0107303	up-regulated	D120 vs. D90
TCONS_00082145	6.7628	1.46897e-05	0.000134518	up-regulated	D120 vs. D90
TCONS_00082470	-5.569	0.0116405	0.03594	down-regulated	D120 vs. D90
TCONS_00082866	3.80611	3.08728e-06	3.37726e-05	up-regulated	D120 vs. D90
TCONS_00082888	3.43295	8.2775e-12	3.24335e-10	up-regulated	D120 vs. D90
TCONS_00082917	6.62128	2.66939e-05	0.00022662	up-regulated	D120 vs. D90
TCONS_00083129	6.27887	2.17192e-10	6.41346e-09	up-regulated	D120 vs. D90
TCONS_00083130	8.30028	4.46862e-10	1.23875e-08	up-regulated	D120 vs. D90
TCONS_00083248	3.14303	3.49565e-05	0.000284896	up-regulated	D120 vs. D90
TCONS_00083258	5.19487	0.011889	0.0363111	up-regulated	D120 vs. D90
TCONS_00083523	5.59529	0.00419914	0.0163434	up-regulated	D120 vs. D90
TCONS_00083878	3.83301	3.79801e-08	6.78812e-07	up-regulated	D120 vs. D90
TCONS_00083879	4.80471	0.000588508	0.00316136	up-regulated	D120 vs. D90
TCONS_00083882	5.3495	0.0170474	0.0480749	up-regulated	D120 vs. D90
TCONS_00083936	6.08634	0.000408876	0.00229184	up-regulated	D120 vs. D90
TCONS_00084231	6.98182	3.19127e-06	3.46785e-05	up-regulated	D120 vs. D90
TCONS_00084247	5.94805	0.000723135	0.00376344	up-regulated	D120 vs. D90
TCONS_00084369	-3.38155	0.000410979	0.00230046	down-regulated	D120 vs. D90
TCONS_00084825	-1.09272	1.59926e-05	0.0001445	down-regulated	D120 vs. D90
TCONS_00085074	5.30264	0.00831111	0.0276021	up-regulated	D120 vs. D90
TCONS_00085082	4.65202	0.00195255	0.00873394	up-regulated	D120 vs. D90
TCONS_00085143	5.27369	0.0107414	0.0338842	up-regulated	D120 vs. D90
TCONS_00085717	5.45341	0.00631784	0.0222137	up-regulated	D120 vs. D90
TCONS_00085829	5.29527	0.0115677	0.0357922	up-regulated	D120 vs. D90
TCONS_00085984	5.48428	0.000588828	0.00316136	up-regulated	D120 vs. D90
TCONS_00086083	5.2978	0.00909381	0.0297171	up-regulated	D120 vs. D90
TCONS_00086117	5.14155	0.0153394	0.0441753	up-regulated	D120 vs. D90
TCONS_00086159	5.81031	0.0013784	0.00653898	up-regulated	D120 vs. D90
TCONS_00086284	5.95003	0.000293066	0.00172828	up-regulated	D120 vs. D90
TCONS_00086289	6.92738	4.57044e-06	4.81255e-05	up-regulated	D120 vs. D90
TCONS_00086754	2.68501	1.01677e-05	9.79516e-05	up-regulated	D120 vs. D90
TCONS_00087034	7.10205	2.62718e-06	2.94924e-05	up-regulated	D120 vs. D90
TCONS_00087356	5.90433	5.71935e-22	9.71099e-20	up-regulated	D120 vs. D90
TCONS_00087360	4.5294	0.00286719	0.0118859	up-regulated	D120 vs. D90
TCONS_00087373	5.30644	2.24601e-06	2.56372e-05	up-regulated	D120 vs. D90
TCONS_00087494	4.70933	0.0112931	0.0351829	up-regulated	D120 vs. D90
TCONS_00087615	-1.03353	0.00489852	0.0183189	down-regulated	D120 vs. D90
TCONS_00087671	5.37129	0.00631425	0.0222137	up-regulated	D120 vs. D90
TCONS_00087718	4.30979	0.007864	0.0263877	up-regulated	D120 vs. D90
TCONS_00088349	-4.81244	1.50062e-09	3.75155e-08	down-regulated	D120 vs. D90
TCONS_00088438	8.83108	1.57651e-11	5.68522e-10	up-regulated	D120 vs. D90
TCONS_00088526	5.66181	0.0071266	0.0245278	up-regulated	D120 vs. D90
TCONS_00088689	5.36956	0.0063714	0.022363	up-regulated	D120 vs. D90
TCONS_00088896	2.48396	1.74878e-06	2.07763e-05	up-regulated	D120 vs. D90
TCONS_00089727	5.3393	0.0173044	0.0485394	up-regulated	D120 vs. D90
TCONS_00089744	5.51564	1.15841e-10	3.49669e-09	up-regulated	D120 vs. D90
TCONS_00090440	2.9526	0.0034764	0.013957	up-regulated	D120 vs. D90
TCONS_00090453	3.568	3.24501e-12	1.42187e-10	up-regulated	D120 vs. D90
TCONS_00090518	-1.75895	0.00782325	0.0262817	down-regulated	D120 vs. D90
TCONS_00090533	-2.21139	4.90156e-14	2.67407e-12	down-regulated	D120 vs. D90
TCONS_00090742	6.51121	5.00895e-05	0.000389532	up-regulated	D120 vs. D90
TCONS_00090764	4.73869	9.3471e-11	2.92996e-09	up-regulated	D120 vs. D90
TCONS_00091181	2.79931	0.000208674	0.00130022	up-regulated	D120 vs. D90
TCONS_00091232	6.7431	1.04444e-15	6.97718e-14	up-regulated	D120 vs. D90
TCONS_00091233	7.24941	8.28933e-07	1.06896e-05	up-regulated	D120 vs. D90
TCONS_00091422	5.19487	0.011889	0.0363111	up-regulated	D120 vs. D90
TCONS_00091479	6.55934	7.59846e-05	0.000565032	up-regulated	D120 vs. D90
TCONS_00091783	-1.87703	2.22224e-07	3.30668e-06	down-regulated	D120 vs. D90
TCONS_00094090	5.01057	0.00564756	0.0203123	up-regulated	D120 vs. D90
TCONS_00094227	7.16723	9.31366e-08	1.57482e-06	up-regulated	D120 vs. D90
TCONS_00094242	6.71421	1.3785e-06	1.6971e-05	up-regulated	D120 vs. D90
TCONS_00094245	6.63176	1.99068e-06	2.33104e-05	up-regulated	D120 vs. D90
TCONS_00094246	5.25628	0.00944481	0.030643	up-regulated	D120 vs. D90
TCONS_00094497	5.04203	0.0174045	0.0487111	up-regulated	D120 vs. D90
TCONS_00094678	5.18116	0.0117864	0.0362488	up-regulated	D120 vs. D90
TCONS_00094750	8.71236	2.69054e-11	9.21341e-10	up-regulated	D120 vs. D90
TCONS_00095771	-1.7305	3.92275e-09	8.78308e-08	down-regulated	D120 vs. D90
TCONS_00095920	3.49589	8.68458e-06	8.50714e-05	up-regulated	D120 vs. D90
TCONS_00096113	2.92182	4.63248e-07	6.39594e-06	up-regulated	D120 vs. D90
TCONS_00096167	-1.4476	1.20483e-07	1.97971e-06	down-regulated	D120 vs. D90
TCONS_00096683	6.40557	0.000304372	0.00177951	up-regulated	D120 vs. D90
TCONS_00096829	5.11155	0.0144684	0.0422644	up-regulated	D120 vs. D90
TCONS_00096975	-1.68748	0.0138579	0.0409804	down-regulated	D120 vs. D90
TCONS_00097020	5.80062	0.00476911	0.0180112	up-regulated	D120 vs. D90
TCONS_00097381	-1.19301	0.00268877	0.0112724	down-regulated	D120 vs. D90
TCONS_00097959	5.49475	0.00485362	0.0182122	up-regulated	D120 vs. D90
TCONS_00098373	5.28558	0.0102079	0.0325646	up-regulated	D120 vs. D90
TCONS_00099198	5.46322	0.00787474	0.0263894	up-regulated	D120 vs. D90
TCONS_00099289	7.22405	8.61873e-07	1.10793e-05	up-regulated	D120 vs. D90
TCONS_00099294	6.7479	2.02166e-05	0.000179874	up-regulated	D120 vs. D90
TCONS_00099614	4.77863	0.00176152	0.00796691	up-regulated	D120 vs. D90
TCONS_00099763	2.11476	2.24791e-07	3.331e-06	up-regulated	D120 vs. D90
TCONS_00099876	3.9433	9.0739e-09	1.87696e-07	up-regulated	D120 vs. D90
TCONS_00100199	7.27222	6.48944e-07	8.61384e-06	up-regulated	D120 vs. D90
TCONS_00100322	3.282	0.00197049	0.00880027	up-regulated	D120 vs. D90
TCONS_00100379	4.93036	7.92612e-16	5.38315e-14	up-regulated	D120 vs. D90
TCONS_00100393	4.10354	1.3687e-06	1.69014e-05	up-regulated	D120 vs. D90
TCONS_00100409	5.13701	0.00212024	0.00928031	up-regulated	D120 vs. D90
TCONS_00101761	6.47802	8.93587e-05	0.000641086	up-regulated	D120 vs. D90
TCONS_00101799	5.58242	0.00353958	0.0141271	up-regulated	D120 vs. D90
TCONS_00101920	4.39135	0.00124745	0.00603724	up-regulated	D120 vs. D90
TCONS_00102111	3.56644	0.000517098	0.00282085	up-regulated	D120 vs. D90
TCONS_00102188	5.8469	9.31781e-20	1.18656e-17	up-regulated	D120 vs. D90
TCONS_00103338	-1.34303	0.0074678	0.0254081	down-regulated	D120 vs. D90
TCONS_00103707	-4.85615	0.000963259	0.00478693	down-regulated	D120 vs. D90
TCONS_00103761	5.19941	0.0118804	0.0363111	up-regulated	D120 vs. D90
TCONS_00103763	3.88075	1.96035e-05	0.000175185	up-regulated	D120 vs. D90
TCONS_00103784	5.90628	8.96013e-05	0.000641696	up-regulated	D120 vs. D90
TCONS_00104680	-2.51957	1.27314e-16	9.78183e-15	down-regulated	D120 vs. D90
TCONS_00104796	-3.00429	0.000919622	0.00460853	down-regulated	D120 vs. D90
TCONS_00105124	6.93535	1.49838e-09	3.75155e-08	up-regulated	D120 vs. D90
TCONS_00105443	2.05704	0.0172681	0.0484959	up-regulated	D120 vs. D90
TCONS_00105449	5.50232	0.000613424	0.00325907	up-regulated	D120 vs. D90
TCONS_00105630	-1.13166	0.0132944	0.0397176	down-regulated	D120 vs. D90
TCONS_00105854	5.34528	0.0167417	0.0474756	up-regulated	D120 vs. D90
TCONS_00106157	-2.11009	0.000292825	0.00172828	down-regulated	D120 vs. D90
TCONS_00106660	-1.67896	0.000270269	0.00162921	down-regulated	D120 vs. D90
TCONS_00106822	2.29681	0.0136134	0.0404629	up-regulated	D120 vs. D90
TCONS_00107244	5.25071	0.0106826	0.0337977	up-regulated	D120 vs. D90
TCONS_00107250	3.81528	0.00344809	0.013857	up-regulated	D120 vs. D90
TCONS_00107506	6.97781	8.16136e-06	8.04151e-05	up-regulated	D120 vs. D90
TCONS_00107804	-2.07176	2.47044e-05	0.000211938	down-regulated	D120 vs. D90
TCONS_00107843	5.96126	0.00100272	0.00495884	up-regulated	D120 vs. D90
TCONS_00107867	-4.63714	0.0143462	0.042028	down-regulated	D120 vs. D90
TCONS_00107905	4.57651	0.00253314	0.0107303	up-regulated	D120 vs. D90
TCONS_00108660	-2.82715	5.66005e-10	1.54797e-08	down-regulated	D120 vs. D90
TCONS_00109235	4.12302	2.13026e-05	0.000188304	up-regulated	D120 vs. D90
TCONS_00109846	7.14348	1.33088e-06	1.65345e-05	up-regulated	D120 vs. D90
TCONS_00110086	4.14428	0.0133985	0.03997	up-regulated	D120 vs. D90
TCONS_00110115	6.66991	2.68313e-05	0.000226926	up-regulated	D120 vs. D90
TCONS_00110410	4.0461	3.0257e-05	0.000251627	up-regulated	D120 vs. D90
TCONS_00110793	6.81906	1.65768e-05	0.000149448	up-regulated	D120 vs. D90
TCONS_00111082	4.24378	0.00922933	0.0300636	up-regulated	D120 vs. D90
TCONS_00111302	6.35472	0.000142424	0.000936094	up-regulated	D120 vs. D90
TCONS_00111305	5.50901	0.00504715	0.0186974	up-regulated	D120 vs. D90
TCONS_00111478	5.49146	1.45209e-06	1.78231e-05	up-regulated	D120 vs. D90
TCONS_00111873	5.42466	0.0084662	0.0280131	up-regulated	D120 vs. D90
TCONS_00111971	-3.98223	0.00410936	0.0160553	down-regulated	D120 vs. D90
TCONS_00112346	6.21466	1.84284e-05	0.000165409	up-regulated	D120 vs. D90
TCONS_00112429	3.88248	0.00011373	0.000776301	up-regulated	D120 vs. D90
TCONS_00112486	7.0067	2.03394e-36	1.03604e-33	up-regulated	D120 vs. D90
TCONS_00112738	1.10086	0.00859821	0.0283706	up-regulated	D120 vs. D90
TCONS_00113014	5.0649	0.0173074	0.0485394	up-regulated	D120 vs. D90
TCONS_00113034	4.64511	2.69427e-10	7.67774e-09	up-regulated	D120 vs. D90
TCONS_00113325	2.61899	5.50935e-05	0.000423596	up-regulated	D120 vs. D90
TCONS_00113394	9.85427	2.62975e-15	1.70099e-13	up-regulated	D120 vs. D90
TCONS_00113397	6.61571	2.56478e-05	0.000219108	up-regulated	D120 vs. D90
TCONS_00113401	6.71465	5.59059e-05	0.000429033	up-regulated	D120 vs. D90
TCONS_00114151	5.97807	0.000852295	0.00431978	up-regulated	D120 vs. D90
TCONS_00114387	5.86365	4.36713e-06	4.62235e-05	up-regulated	D120 vs. D90
TCONS_00114483	6.32428	0.000164141	0.00105604	up-regulated	D120 vs. D90
TCONS_00114735	10.4304	2.5832e-17	2.10531e-15	up-regulated	D120 vs. D90
TCONS_00114796	3.45514	0.00308049	0.0126105	up-regulated	D120 vs. D90
TCONS_00115023	6.02037	0.000735802	0.00381961	up-regulated	D120 vs. D90
TCONS_00115197	3.85676	5.09559e-05	0.000395515	up-regulated	D120 vs. D90
TCONS_00115401	5.78263	0.00144124	0.00676621	up-regulated	D120 vs. D90
TCONS_00116120	-1.57686	0.000384527	0.00216429	down-regulated	D120 vs. D90
TCONS_00116317	5.15589	0.0156282	0.0449751	up-regulated	D120 vs. D90
TCONS_00116392	2.24777	0.00431861	0.0167267	up-regulated	D120 vs. D90
TCONS_00116671	1.75189	0.00304101	0.0124795	up-regulated	D120 vs. D90
TCONS_00116705	5.12249	0.0142399	0.0418065	up-regulated	D120 vs. D90
TCONS_00116717	5.43185	0.00518782	0.0190798	up-regulated	D120 vs. D90
TCONS_00116799	5.24566	0.0105668	0.0335356	up-regulated	D120 vs. D90
TCONS_00116968	3.45663	0.00114505	0.00558809	up-regulated	D120 vs. D90
TCONS_00116975	5.55097	0.00370486	0.0146861	up-regulated	D120 vs. D90
TCONS_00117078	6.07366	0.000833357	0.00423433	up-regulated	D120 vs. D90
TCONS_00117631	5.13204	0.0142305	0.0418065	up-regulated	D120 vs. D90
TCONS_00117976	3.48919	0.0135601	0.0403338	up-regulated	D120 vs. D90
TCONS_00118577	2.37598	0.00417546	0.0162667	up-regulated	D120 vs. D90
TCONS_00119038	5.28997	1.24774e-07	2.03382e-06	up-regulated	D120 vs. D90
TCONS_00119382	4.15135	2.1312e-08	4.12023e-07	up-regulated	D120 vs. D90
TCONS_00119890	5.87704	0.00120416	0.00584857	up-regulated	D120 vs. D90
TCONS_00119931	3.69633	0.0138274	0.04092	up-regulated	D120 vs. D90
TCONS_00120660	2.77546	0.00502674	0.0186387	up-regulated	D120 vs. D90
TCONS_00121056	5.25422	1.95608e-07	2.97426e-06	up-regulated	D120 vs. D90
TCONS_00121470	5.40778	0.000984687	0.00487558	up-regulated	D120 vs. D90
TCONS_00121996	-1.20969	0.00452082	0.0173142	down-regulated	D120 vs. D90
TCONS_00123167	-1.36424	0.000885747	0.0044671	down-regulated	D120 vs. D90
TCONS_00123171	-1.60579	0.00352584	0.0140861	down-regulated	D120 vs. D90
TCONS_00124156	4.68281	1.52904e-07	2.39647e-06	up-regulated	D120 vs. D90
TCONS_00124449	3.78672	3.02184e-05	0.000251627	up-regulated	D120 vs. D90
TCONS_00125349	-6.43074	0.000123203	0.000831215	down-regulated	D120 vs. D90
TCONS_00125497	6.33996	0.000435715	0.00241899	up-regulated	D120 vs. D90
TCONS_00125644	5.11431	0.0152011	0.0438403	up-regulated	D120 vs. D90
TCONS_00125686	3.36223	0.0102824	0.0327605	up-regulated	D120 vs. D90
TCONS_00125711	6.39047	0.000109411	0.000750591	up-regulated	D120 vs. D90
TCONS_00125933	5.83681	0.00141139	0.00664905	up-regulated	D120 vs. D90
TCONS_00125959	4.07609	1.98154e-08	3.86353e-07	up-regulated	D120 vs. D90
TCONS_00126454	7.22178	6.91293e-07	9.08716e-06	up-regulated	D120 vs. D90
TCONS_00126511	3.90453	0.0072404	0.0248397	up-regulated	D120 vs. D90
TCONS_00126783	1.22948	0.0166259	0.0473117	up-regulated	D120 vs. D90
TCONS_00127102	5.81116	0.00131383	0.00628385	up-regulated	D120 vs. D90
TCONS_00127271	4.01161	0.00450531	0.0172873	up-regulated	D120 vs. D90
TCONS_00127682	5.02294	1.3033e-06	1.62913e-05	up-regulated	D120 vs. D90
TCONS_00128135	6.67453	2.45983e-05	0.000211473	up-regulated	D120 vs. D90
TCONS_00129157	4.49074	0.00460029	0.0175198	up-regulated	D120 vs. D90
TCONS_00129492	1.40533	0.00776156	0.0261175	up-regulated	D120 vs. D90
TCONS_00129633	6.94317	2.07927e-05	0.000184196	up-regulated	D120 vs. D90
TCONS_00129673	5.07014	3.43889e-11	1.15814e-09	up-regulated	D120 vs. D90
TCONS_00129674	6.0951	0.000472146	0.0026	up-regulated	D120 vs. D90
TCONS_00129677	5.24887	0.000204578	0.00128058	up-regulated	D120 vs. D90
TCONS_00129887	4.77092	8.05575e-05	0.00059362	up-regulated	D120 vs. D90
TCONS_00130090	6.64659	2.39044e-05	0.000207042	up-regulated	D120 vs. D90
TCONS_00130543	3.31514	3.19992e-05	0.000262368	up-regulated	D120 vs. D90
TCONS_00130545	2.44211	0.00104433	0.00514587	up-regulated	D120 vs. D90
TCONS_00130648	-1.2096	0.00605767	0.0215401	down-regulated	D120 vs. D90
TCONS_00130739	4.01617	0.000228349	0.00141417	up-regulated	D120 vs. D90
TCONS_00130998	-2.7071	0.0159769	0.0457204	down-regulated	D120 vs. D90
TCONS_00132050	6.09644	0.000374531	0.00212565	up-regulated	D120 vs. D90
TCONS_00132217	-1.33067	0.0032988	0.0133757	down-regulated	D120 vs. D90
TCONS_00132616	3.80759	0.00035258	0.0020322	up-regulated	D120 vs. D90
TCONS_00133709	-2.76217	0.00191039	0.00856418	down-regulated	D120 vs. D90
TCONS_00134632	3.69491	3.18475e-07	4.53772e-06	up-regulated	D120 vs. D90
TCONS_00134852	6.48177	5.33796e-05	0.000411973	up-regulated	D120 vs. D90
TCONS_00134938	3.59345	0.00229871	0.009944	up-regulated	D120 vs. D90
TCONS_00135017	2.65644	0.00214295	0.00936967	up-regulated	D120 vs. D90
TCONS_00135063	3.33195	0.000120251	0.000813994	up-regulated	D120 vs. D90
TCONS_00135105	5.8614	0.00105874	0.00520147	up-regulated	D120 vs. D90
TCONS_00135847	8.07616	2.08571e-09	5.02915e-08	up-regulated	D120 vs. D90
TCONS_00135901	1.87437	2.22339e-07	3.30668e-06	up-regulated	D120 vs. D90
TCONS_00136291	2.10208	0.00541694	0.0196039	up-regulated	D120 vs. D90
TCONS_00137589	5.94775	0.00106148	0.00520521	up-regulated	D120 vs. D90
TCONS_00137735	1.2448	0.000504937	0.0027619	up-regulated	D120 vs. D90
TCONS_00137750	2.77268	0.000103839	0.000715978	up-regulated	D120 vs. D90
TCONS_00137835	5.12388	0.0140445	0.0414721	up-regulated	D120 vs. D90
TCONS_00137899	5.36124	0.0160552	0.0458801	up-regulated	D120 vs. D90
TCONS_00138205	6.44215	8.58235e-05	0.000623406	up-regulated	D120 vs. D90
TCONS_00138249	3.82898	4.30365e-05	0.000340531	up-regulated	D120 vs. D90
TCONS_00138251	3.03948	2.39554e-06	2.71162e-05	up-regulated	D120 vs. D90
TCONS_00138327	3.79843	9.22623e-05	0.000651592	up-regulated	D120 vs. D90
TCONS_00138361	2.76398	0.00746734	0.0254081	up-regulated	D120 vs. D90
TCONS_00138372	2.2862	0.00432227	0.0167267	up-regulated	D120 vs. D90
TCONS_00138998	5.06004	1.26248e-05	0.000117391	up-regulated	D120 vs. D90
TCONS_00139551	5.53152	0.00444813	0.0171001	up-regulated	D120 vs. D90
TCONS_00139628	5.9131	0.000980174	0.00485914	up-regulated	D120 vs. D90
TCONS_00139636	4.9884	0.000278257	0.0016675	up-regulated	D120 vs. D90
TCONS_00139752	-5.73553	0.00236495	0.0101444	down-regulated	D120 vs. D90
TCONS_00141016	-6.36709	0.000139132	0.000916411	down-regulated	D120 vs. D90
TCONS_00141829	2.43349	0.00915159	0.0298581	up-regulated	D120 vs. D90
TCONS_00142274	2.39213	7.54342e-07	9.85238e-06	up-regulated	D120 vs. D90
TCONS_00144063	4.37824	0.005639	0.0202994	up-regulated	D120 vs. D90
TCONS_00144539	5.40498	0.00864315	0.0284382	up-regulated	D120 vs. D90
TCONS_00144588	4.70896	0.00953768	0.0308706	up-regulated	D120 vs. D90
TCONS_00144752	4.50306	3.88864e-05	0.000313786	up-regulated	D120 vs. D90
TCONS_00145860	-2.15519	0.000231612	0.00143003	down-regulated	D120 vs. D90
TCONS_00145862	7.05963	8.12639e-10	2.15033e-08	up-regulated	D120 vs. D90
TCONS_00146064	-1.60602	0.00684641	0.0238041	down-regulated	D120 vs. D90
TCONS_00146729	6.60095	3.37034e-05	0.000275233	up-regulated	D120 vs. D90
TCONS_00147025	4.11754	0.000646152	0.0034019	up-regulated	D120 vs. D90
TCONS_00147139	5.0535	0.0167923	0.0475528	up-regulated	D120 vs. D90
TCONS_00147447	5.35042	0.00774778	0.0260927	up-regulated	D120 vs. D90
TCONS_00147608	2.54277	0.000171113	0.00109122	up-regulated	D120 vs. D90
TCONS_00147634	-2.04691	0.00231066	0.00996398	down-regulated	D120 vs. D90
TCONS_00147823	6.1518	0.000276264	0.00165799	up-regulated	D120 vs. D90
TCONS_00147980	6.00592	0.000648223	0.0034084	up-regulated	D120 vs. D90
TCONS_00148080	2.26999	0.0171061	0.0481737	up-regulated	D120 vs. D90
TCONS_00149101	6.78222	1.1056e-05	0.000105265	up-regulated	D120 vs. D90
TCONS_00149106	6.66853	4.44547e-05	0.000351071	up-regulated	D120 vs. D90
TCONS_00149127	5.28674	0.0130438	0.0390835	up-regulated	D120 vs. D90
TCONS_00149174	6.51671	6.34581e-05	0.000476228	up-regulated	D120 vs. D90
TCONS_00150216	7.54712	8.16203e-08	1.39749e-06	up-regulated	D120 vs. D90
TCONS_00150312	3.17788	7.29244e-06	7.31817e-05	up-regulated	D120 vs. D90
TCONS_00150560	5.20499	0.000142939	0.000936457	up-regulated	D120 vs. D90
TCONS_00150856	5.61061	0.0037669	0.0148741	up-regulated	D120 vs. D90
TCONS_00151166	3.7673	0.00228004	0.00989472	up-regulated	D120 vs. D90
TCONS_00151894	6.17054	0.000412855	0.0023078	up-regulated	D120 vs. D90
TCONS_00152521	5.46212	0.00618109	0.0218835	up-regulated	D120 vs. D90
TCONS_00152523	4.95712	0.00451518	0.0173089	up-regulated	D120 vs. D90
TCONS_00152811	6.05137	0.000434716	0.00241673	up-regulated	D120 vs. D90
TCONS_00152842	5.51287	0.00465959	0.017696	up-regulated	D120 vs. D90
TCONS_00152851	6.06887	0.000492752	0.00269997	up-regulated	D120 vs. D90
TCONS_00153223	3.25371	1.58679e-07	2.47745e-06	up-regulated	D120 vs. D90
TCONS_00153229	6.31941	0.000139205	0.000916411	up-regulated	D120 vs. D90
TCONS_00153908	3.29117	1.14744e-08	2.31475e-07	up-regulated	D120 vs. D90
TCONS_00154031	2.55714	0.00272552	0.0113812	up-regulated	D120 vs. D90
TCONS_00154401	7.81699	1.96202e-08	3.85551e-07	up-regulated	D120 vs. D90
TCONS_00154403	7.05048	2.70039e-06	3.02311e-05	up-regulated	D120 vs. D90
TCONS_00154447	6.30925	0.000131268	0.000875475	up-regulated	D120 vs. D90
TCONS_00154591	4.3146	4.90859e-16	3.44871e-14	up-regulated	D120 vs. D90
TCONS_00155038	3.81083	2.00907e-05	0.000179146	up-regulated	D120 vs. D90
TCONS_00155043	-3.41166	0.00223004	0.00969843	down-regulated	D120 vs. D90
TCONS_00155462	5.68231	0.00261286	0.0109994	up-regulated	D120 vs. D90
TCONS_00155693	6.74021	1.05262e-06	1.33213e-05	up-regulated	D120 vs. D90
TCONS_00155694	5.88669	9.62282e-05	0.000674922	up-regulated	D120 vs. D90
TCONS_00155892	7.5296	1.0193e-07	1.70231e-06	up-regulated	D120 vs. D90
TCONS_00156416	-4.15157	0.0128422	0.0385361	down-regulated	D120 vs. D90
TCONS_00156546	3.6933	0.000235832	0.00145169	up-regulated	D120 vs. D90
TCONS_00156609	4.01766	2.51897e-08	4.75222e-07	up-regulated	D120 vs. D90
TCONS_00156760	-1.86753	0.00531153	0.0193082	down-regulated	D120 vs. D90
TCONS_00156996	2.41545	0.00916142	0.0298662	up-regulated	D120 vs. D90
TCONS_00157149	4.12745	0.0122625	0.0370707	up-regulated	D120 vs. D90
TCONS_00157622	5.27179	0.00987079	0.0316222	up-regulated	D120 vs. D90
TCONS_00157937	5.27247	0.0108821	0.0342695	up-regulated	D120 vs. D90
TCONS_00158267	6.60071	3.5659e-05	0.000290041	up-regulated	D120 vs. D90
TCONS_00158438	7.21619	6.20507e-08	1.07598e-06	up-regulated	D120 vs. D90
TCONS_00158463	5.13404	0.013703	0.0406403	up-regulated	D120 vs. D90
TCONS_00158887	6.38592	0.000161915	0.00104565	up-regulated	D120 vs. D90
TCONS_00159105	7.74111	2.13342e-08	4.12023e-07	up-regulated	D120 vs. D90
TCONS_00159212	6.8175	8.39969e-06	8.24789e-05	up-regulated	D120 vs. D90
TCONS_00159518	5.97466	5.06159e-10	1.39365e-08	up-regulated	D120 vs. D90
TCONS_00159731	6.04569	0.000918568	0.00460853	up-regulated	D120 vs. D90
TCONS_00160076	6.29004	0.000152059	0.000991428	up-regulated	D120 vs. D90
TCONS_00160357	5.91844	0.00157055	0.007248	up-regulated	D120 vs. D90
TCONS_00160365	4.3818	0.00015481	0.00100775	up-regulated	D120 vs. D90
TCONS_00160882	6.26607	0.000195588	0.00123569	up-regulated	D120 vs. D90
TCONS_00161398	5.32067	0.0106962	0.0338145	up-regulated	D120 vs. D90
TCONS_00161515	6.41352	9.24619e-05	0.000651872	up-regulated	D120 vs. D90
TCONS_00162025	7.27437	5.3884e-07	7.29493e-06	up-regulated	D120 vs. D90
TCONS_00162458	2.65975	0.00361973	0.0144047	up-regulated	D120 vs. D90
TCONS_00162492	-2.12139	1.13537e-17	1.02814e-15	down-regulated	D120 vs. D90
TCONS_00162505	-2.09443	0.00736635	0.0251828	down-regulated	D120 vs. D90
TCONS_00163010	6.54404	3.61481e-08	6.48914e-07	up-regulated	D120 vs. D90
TCONS_00163894	6.26967	0.000195527	0.00123569	up-regulated	D120 vs. D90
TCONS_00163905	8.77916	1.11824e-11	4.25466e-10	up-regulated	D120 vs. D90
TCONS_00164012	5.01891	0.00385447	0.0151612	up-regulated	D120 vs. D90
TCONS_00164311	5.44118	0.00516958	0.0190643	up-regulated	D120 vs. D90
TCONS_00165042	-3.35281	1.04984e-06	1.33213e-05	down-regulated	D120 vs. D90
TCONS_00165145	5.52027	0.000451234	0.00249157	up-regulated	D120 vs. D90
TCONS_00165639	4.65589	0.0111637	0.0349938	up-regulated	D120 vs. D90
TCONS_00165700	5.85905	4.89692e-15	2.97835e-13	up-regulated	D120 vs. D90
TCONS_00165921	-1.40789	0.0170466	0.0480749	down-regulated	D120 vs. D90
TCONS_00165945	-1.86632	0.0150722	0.0436215	down-regulated	D120 vs. D90
TCONS_00165981	4.08119	0.0133873	0.0399656	up-regulated	D120 vs. D90
TCONS_00166002	5.33442	0.0112343	0.0350833	up-regulated	D120 vs. D90
TCONS_00166128	2.88565	0.00387468	0.0152113	up-regulated	D120 vs. D90
TCONS_00166391	3.22955	0.00721538	0.0247915	up-regulated	D120 vs. D90
TCONS_00167024	6.0115	0.000548407	0.00296387	up-regulated	D120 vs. D90
TCONS_00167583	-1.436	0.00688005	0.0238809	down-regulated	D120 vs. D90
TCONS_00167835	6.95023	7.76411e-06	7.71676e-05	up-regulated	D120 vs. D90
TCONS_00167844	6.57564	4.95197e-05	0.000385837	up-regulated	D120 vs. D90
TCONS_00168419	5.095	0.00024987	0.00151973	up-regulated	D120 vs. D90
TCONS_00168428	7.32992	4.63947e-07	6.39594e-06	up-regulated	D120 vs. D90
TCONS_00168436	4.68983	4.8661e-14	2.67407e-12	up-regulated	D120 vs. D90
TCONS_00168445	5.06264	2.39306e-05	0.000207042	up-regulated	D120 vs. D90
TCONS_00168620	5.24632	0.00954663	0.030875	up-regulated	D120 vs. D90
TCONS_00168995	7.94382	7.53921e-27	1.80719e-24	up-regulated	D120 vs. D90
TCONS_00169321	7.44994	2.01204e-07	3.02548e-06	up-regulated	D120 vs. D90
TCONS_00169548	6.19454	0.000285306	0.00170223	up-regulated	D120 vs. D90
TCONS_00169634	5.13201	0.0142309	0.0418065	up-regulated	D120 vs. D90
TCONS_00169837	-1.04534	0.0120337	0.0365362	down-regulated	D120 vs. D90
TCONS_00170086	5.19882	0.0141435	0.0417038	up-regulated	D120 vs. D90
TCONS_00170227	5.20919	0.0156999	0.0451179	up-regulated	D120 vs. D90
TCONS_00170278	8.44115	3.95833e-10	1.10481e-08	up-regulated	D120 vs. D90
TCONS_00170316	5.39497	7.15102e-07	9.36991e-06	up-regulated	D120 vs. D90
TCONS_00170318	5.16127	0.0148942	0.0433218	up-regulated	D120 vs. D90
TCONS_00170324	7.9724	7.05971e-09	1.49059e-07	up-regulated	D120 vs. D90
TCONS_00170328	-4.86297	0.00690741	0.0239351	down-regulated	D120 vs. D90
TCONS_00170430	5.60621	0.00381821	0.0150622	up-regulated	D120 vs. D90
TCONS_00170880	5.48044	0.00439945	0.016961	up-regulated	D120 vs. D90
TCONS_00171002	2.63266	0.00938045	0.0304827	up-regulated	D120 vs. D90
TCONS_00171664	5.39623	0.0157526	0.0452055	up-regulated	D120 vs. D90
TCONS_00172131	5.7554	0.00299708	0.0123364	up-regulated	D120 vs. D90
TCONS_00172147	5.96973	0.000653511	0.00342736	up-regulated	D120 vs. D90
TCONS_00172187	7.08902	2.09974e-24	4.27822e-22	up-regulated	D120 vs. D90
TCONS_00172259	5.27473	0.000164302	0.00105604	up-regulated	D120 vs. D90
TCONS_00173158	5.06278	0.0168535	0.0476931	up-regulated	D120 vs. D90
TCONS_00173905	-2.15893	3.4996e-08	6.33816e-07	down-regulated	D120 vs. D90
TCONS_00174040	-2.80753	0.00217806	0.00950277	down-regulated	D120 vs. D90
TCONS_00174059	5.29347	0.0103657	0.0329746	up-regulated	D120 vs. D90
TCONS_00174158	5.97376	4.13948e-06	4.43905e-05	up-regulated	D120 vs. D90
TCONS_00174420	2.98149	1.61241e-20	2.19018e-18	up-regulated	D120 vs. D90
TCONS_00174433	1.48473	0.00807337	0.0269222	up-regulated	D120 vs. D90
TCONS_00174577	5.20908	0.0118717	0.0363111	up-regulated	D120 vs. D90
TCONS_00174921	5.48469	7.71004e-16	5.32515e-14	up-regulated	D120 vs. D90
TCONS_00175175	5.05992	0.017165	0.0483061	up-regulated	D120 vs. D90
TCONS_00175233	5.4501	0.00831831	0.0276035	up-regulated	D120 vs. D90
TCONS_00175712	5.81894	3.08382e-13	1.56553e-11	up-regulated	D120 vs. D90
TCONS_00176423	5.43679	0.00529169	0.0192844	up-regulated	D120 vs. D90
TCONS_00176521	5.47615	0.00495821	0.0184201	up-regulated	D120 vs. D90
TCONS_00176626	4.3368	6.24291e-07	8.36838e-06	up-regulated	D120 vs. D90
TCONS_00176907	-1.32424	0.0147754	0.0430686	down-regulated	D120 vs. D90
TCONS_00177049	5.86182	0.00117234	0.00570763	up-regulated	D120 vs. D90
TCONS_00177110	3.82794	0.011515	0.0356835	up-regulated	D120 vs. D90
TCONS_00177201	6.69183	2.32899e-05	0.000202791	up-regulated	D120 vs. D90
TCONS_00177246	3.82956	9.95e-05	0.000691915	up-regulated	D120 vs. D90
TCONS_00177996	-1.65563	0.000138949	0.000916411	down-regulated	D120 vs. D90
TCONS_00178037	4.13272	0.0117671	0.0362169	up-regulated	D120 vs. D90
TCONS_00178135	2.52223	5.14919e-07	7.01771e-06	up-regulated	D120 vs. D90
TCONS_00178255	-4.34199	5.91021e-10	1.60561e-08	down-regulated	D120 vs. D90
TCONS_00178466	4.95792	2.19057e-06	2.50746e-05	up-regulated	D120 vs. D90
TCONS_00178728	5.89642	0.00121137	0.00587661	up-regulated	D120 vs. D90
TCONS_00178908	5.70682	0.000216476	0.00134268	up-regulated	D120 vs. D90
TCONS_00178981	8.91931	4.51702e-12	1.89761e-10	up-regulated	D120 vs. D90
TCONS_00179043	6.7575	1.49201e-05	0.000136177	up-regulated	D120 vs. D90
TCONS_00179047	3.74763	0.000115975	0.000790295	up-regulated	D120 vs. D90
TCONS_00179457	7.35806	2.84307e-07	4.13769e-06	up-regulated	D120 vs. D90
TCONS_00179458	6.87109	6.52897e-06	6.61829e-05	up-regulated	D120 vs. D90
TCONS_00179589	5.76694	0.00202838	0.00898439	up-regulated	D120 vs. D90
TCONS_00179619	5.55256	0.00520552	0.0191276	up-regulated	D120 vs. D90
TCONS_00179635	5.25004	0.0104224	0.033129	up-regulated	D120 vs. D90
TCONS_00179711	2.24375	0.00525608	0.0192094	up-regulated	D120 vs. D90
TCONS_00180115	5.77872	0.00151912	0.00707477	up-regulated	D120 vs. D90
TCONS_00180211	2.02829	0.000285815	0.00170277	up-regulated	D120 vs. D90
TCONS_00180247	5.76613	0.00152368	0.00708789	up-regulated	D120 vs. D90
TCONS_00180300	-2.35102	2.00295e-06	2.33869e-05	down-regulated	D120 vs. D90
TCONS_00180455	5.10396	0.015714	0.0451266	up-regulated	D120 vs. D90
TCONS_00180604	5.10462	0.0159426	0.0456544	up-regulated	D120 vs. D90
TCONS_00181674	4.66298	4.52257e-21	6.58196e-19	up-regulated	D120 vs. D90
TCONS_00181947	5.63114	7.29149e-17	5.82605e-15	up-regulated	D120 vs. D90
TCONS_00182050	2.69542	1.26288e-05	0.000117391	up-regulated	D120 vs. D90
TCONS_00182161	6.37674	9.19833e-05	0.000651592	up-regulated	D120 vs. D90
TCONS_00182797	2.44922	0.0112723	0.0351451	up-regulated	D120 vs. D90
TCONS_00182798	1.04399	0.00794143	0.0265692	up-regulated	D120 vs. D90
TCONS_00182838	4.96381	0.0043338	0.0167554	up-regulated	D120 vs. D90
TCONS_00183005	1.98773	0.000255001	0.00154632	up-regulated	D120 vs. D90
TCONS_00183398	5.18706	0.0120321	0.0365362	up-regulated	D120 vs. D90
TCONS_00183738	6.55519	3.95583e-05	0.000318577	up-regulated	D120 vs. D90
TCONS_00183792	-2.64579	3.11185e-13	1.56553e-11	down-regulated	D120 vs. D90
TCONS_00183848	-2.55568	3.93682e-06	4.23286e-05	down-regulated	D120 vs. D90
TCONS_00183875	-1.96812	0.000775249	0.00397877	down-regulated	D120 vs. D90
TCONS_00183887	3.65368	1.29269e-05	0.000119721	up-regulated	D120 vs. D90
TCONS_00183902	3.26117	4.50063e-12	1.89761e-10	up-regulated	D120 vs. D90
TCONS_00183905	3.62271	3.34061e-08	6.07723e-07	up-regulated	D120 vs. D90
TCONS_00183914	3.04662	1.06316e-10	3.25743e-09	up-regulated	D120 vs. D90
TCONS_00183924	7.39722	2.3942e-08	4.53785e-07	up-regulated	D120 vs. D90
TCONS_00184029	4.03301	1.14005e-05	0.000107789	up-regulated	D120 vs. D90
TCONS_00184336	1.29587	0.0158311	0.0453989	up-regulated	D120 vs. D90
TCONS_00184832	4.74958	5.8472e-05	0.000444981	up-regulated	D120 vs. D90
TCONS_00185261	6.34157	1.65849e-07	2.55998e-06	up-regulated	D120 vs. D90
TCONS_00185389	-1.6878	0.000146953	0.000961212	down-regulated	D120 vs. D90
TCONS_00186252	-1.18559	1.17618e-05	0.000110691	down-regulated	D120 vs. D90
TCONS_00186747	3.53314	1.25629e-08	2.52187e-07	up-regulated	D120 vs. D90
TCONS_00186886	5.26438	0.011272	0.0351451	up-regulated	D120 vs. D90
TCONS_00187125	3.92527	8.67854e-07	1.11211e-05	up-regulated	D120 vs. D90
TCONS_00187495	5.11291	0.0146769	0.0428119	up-regulated	D120 vs. D90
TCONS_00187538	2.20962	1.98571e-10	5.90641e-09	up-regulated	D120 vs. D90
TCONS_00187696	3.97044	0.005242	0.0191924	up-regulated	D120 vs. D90
TCONS_00187719	5.55817	0.000476093	0.00261466	up-regulated	D120 vs. D90
TCONS_00187811	1.48792	0.00243243	0.0103901	up-regulated	D120 vs. D90
TCONS_00187946	5.56437	0.00388202	0.0152141	up-regulated	D120 vs. D90
TCONS_00188025	4.39883	9.07894e-05	0.000647928	up-regulated	D120 vs. D90
TCONS_00188026	4.12745	0.0115491	0.035762	up-regulated	D120 vs. D90
TCONS_00188318	4.56143	0.000200823	0.00126094	up-regulated	D120 vs. D90
TCONS_00188908	4.28479	2.16073e-06	2.48028e-05	up-regulated	D120 vs. D90
TCONS_00189314	3.96522	0.00514254	0.0189886	up-regulated	D120 vs. D90
TCONS_00189836	-1.6854	3.27187e-06	3.54598e-05	down-regulated	D120 vs. D90
TCONS_00189938	5.71238	0.00206166	0.00908246	up-regulated	D120 vs. D90
TCONS_00190343	7.4585	2.40646e-07	3.55302e-06	up-regulated	D120 vs. D90
TCONS_00190583	5.58964	0.000367944	0.0020941	up-regulated	D120 vs. D90
TCONS_00190667	-2.58107	2.2853e-09	5.478e-08	down-regulated	D120 vs. D90
TCONS_00191739	-1.19438	0.00491195	0.0183299	down-regulated	D120 vs. D90
TCONS_00191985	-3.89201	2.24714e-05	0.000197351	down-regulated	D120 vs. D90
TCONS_00192179	7.53318	1.3952e-07	2.22088e-06	up-regulated	D120 vs. D90
TCONS_00192565	3.16125	0.00128579	0.00617048	up-regulated	D120 vs. D90
TCONS_00192900	3.24405	4.65414e-13	2.28501e-11	up-regulated	D120 vs. D90
TCONS_00193978	2.84746	0.00445455	0.0171087	up-regulated	D120 vs. D90
TCONS_00194189	5.48264	2.3602e-12	1.0569e-10	up-regulated	D120 vs. D90
TCONS_00194551	6.66306	2.86601e-05	0.000240308	up-regulated	D120 vs. D90
TCONS_00194588	6.83059	1.04092e-05	9.95714e-05	up-regulated	D120 vs. D90
TCONS_00194589	5.31574	2.15163e-08	4.13295e-07	up-regulated	D120 vs. D90
TCONS_00194674	2.21456	3.93824e-11	1.31544e-09	up-regulated	D120 vs. D90
TCONS_00194853	3.14122	3.08691e-06	3.37726e-05	up-regulated	D120 vs. D90
TCONS_00196001	5.42065	0.0140681	0.0415116	up-regulated	D120 vs. D90
TCONS_00196008	7.152	2.542e-06	2.86943e-05	up-regulated	D120 vs. D90
TCONS_00196079	-4.60298	0.000243815	0.00148734	down-regulated	D120 vs. D90
TCONS_00196181	6.20309	0.000380214	0.00214594	up-regulated	D120 vs. D90
TCONS_00196277	3.54094	0.00714774	0.0245798	up-regulated	D120 vs. D90
TCONS_00196292	1.0477	0.0116419	0.03594	up-regulated	D120 vs. D90
TCONS_00196696	3.73091	0.000537162	0.00291469	up-regulated	D120 vs. D90
TCONS_00196937	4.3454	0.00240101	0.0102775	up-regulated	D120 vs. D90
TCONS_00197017	2.82253	0.00420555	0.0163527	up-regulated	D120 vs. D90
TCONS_00197148	7.07304	1.80028e-06	2.12027e-05	up-regulated	D120 vs. D90
TCONS_00198298	5.9882	0.000617529	0.0032766	up-regulated	D120 vs. D90
TCONS_00198494	5.58165	3.70848e-14	2.12846e-12	up-regulated	D120 vs. D90
TCONS_00198512	7.39575	2.16029e-08	4.13295e-07	up-regulated	D120 vs. D90
TCONS_00198775	-1.67983	0.0120513	0.0365362	down-regulated	D120 vs. D90
TCONS_00199648	8.17189	3.72305e-24	7.22449e-22	up-regulated	D120 vs. D90
TCONS_00199926	5.11155	0.0144684	0.0422644	up-regulated	D120 vs. D90
TCONS_00199981	6.43627	7.30043e-05	0.000544858	up-regulated	D120 vs. D90
TCONS_00200156	2.23794	0.00746968	0.0254081	up-regulated	D120 vs. D90
TCONS_00200189	5.92354	0.000950831	0.00474833	up-regulated	D120 vs. D90
TCONS_00200359	3.18104	0.0028763	0.0119115	up-regulated	D120 vs. D90
TCONS_00200441	10.6818	4.17819e-18	3.86957e-16	up-regulated	D120 vs. D90
TCONS_00200571	5.55876	0.00439913	0.016961	up-regulated	D120 vs. D90
TCONS_00200641	5.92552	0.000850431	0.0043157	up-regulated	D120 vs. D90
TCONS_00200932	7.41909	3.04561e-07	4.37002e-06	up-regulated	D120 vs. D90
TCONS_00200945	7.37374	3.50833e-07	4.94687e-06	up-regulated	D120 vs. D90
TCONS_00201162	5.71811	3.48312e-09	7.87694e-08	up-regulated	D120 vs. D90
TCONS_00201385	7.62328	4.79835e-08	8.46462e-07	up-regulated	D120 vs. D90
TCONS_00201433	-5.08132	0.00487786	0.0182864	down-regulated	D120 vs. D90
TCONS_00201757	2.88301	0.000694536	0.00362386	up-regulated	D120 vs. D90
TCONS_00202262	-2.78081	4.71818e-06	4.94257e-05	down-regulated	D120 vs. D90
TCONS_00202267	-2.86886	0.000304072	0.00177951	down-regulated	D120 vs. D90
TCONS_00202458	6.59764	0.000100957	0.000700848	up-regulated	D120 vs. D90
TCONS_00202888	-1.89724	0.00121457	0.00588513	down-regulated	D120 vs. D90
TCONS_00203058	6.38453	7.30919e-06	7.31817e-05	up-regulated	D120 vs. D90
TCONS_00203070	5.96585	0.000894009	0.0045032	up-regulated	D120 vs. D90
TCONS_00203336	6.12591	0.000330354	0.00191765	up-regulated	D120 vs. D90
TCONS_00203456	2.7275	0.000159047	0.00103203	up-regulated	D120 vs. D90
TCONS_00203465	2.18891	0.000311648	0.00181944	up-regulated	D120 vs. D90
TCONS_00203488	8.49582	1.871e-11	6.62984e-10	up-regulated	D120 vs. D90
TCONS_00203514	7.25147	5.88779e-07	7.91839e-06	up-regulated	D120 vs. D90
TCONS_00203518	3.10222	0.00351696	0.0140644	up-regulated	D120 vs. D90
TCONS_00203519	3.91891	1.55822e-32	5.29146e-30	up-regulated	D120 vs. D90
TCONS_00203520	3.86522	1.20866e-12	5.66127e-11	up-regulated	D120 vs. D90
TCONS_00203522	5.13987	0.00297949	0.0122765	up-regulated	D120 vs. D90
TCONS_00203534	4.86988	0.00580539	0.0207699	up-regulated	D120 vs. D90
TCONS_00203630	2.37419	1.47416e-09	3.73118e-08	up-regulated	D120 vs. D90
TCONS_00203848	9.47157	2.18732e-13	1.14274e-11	up-regulated	D120 vs. D90
TCONS_00203971	4.33651	0.000155709	0.00101199	up-regulated	D120 vs. D90
TCONS_00204033	6.00336	0.000591276	0.00316616	up-regulated	D120 vs. D90
TCONS_00204099	5.50635	0.00482201	0.0181103	up-regulated	D120 vs. D90
TCONS_00204226	5.98331	0.000634993	0.00335616	up-regulated	D120 vs. D90
TCONS_00204267	3.67054	0.00179553	0.00808483	up-regulated	D120 vs. D90
TCONS_00204295	2.38665	0.000664588	0.00347651	up-regulated	D120 vs. D90
TCONS_00204507	5.5216	0.0113503	0.0353074	up-regulated	D120 vs. D90
TCONS_00204513	3.78454	8.29379e-05	0.000606772	up-regulated	D120 vs. D90
TCONS_00204813	7.11358	1.53532e-06	1.86204e-05	up-regulated	D120 vs. D90
TCONS_00205052	-3.29783	8.78264e-05	0.000632319	down-regulated	D120 vs. D90
TCONS_00205065	-2.19522	8.7011e-09	1.80903e-07	down-regulated	D120 vs. D90
TCONS_00205262	5.17731	0.00222079	0.0096685	up-regulated	D120 vs. D90
TCONS_00205389	5.64632	0.00250326	0.0106258	up-regulated	D120 vs. D90
TCONS_00205780	3.62755	0.00179449	0.00808483	up-regulated	D120 vs. D90
TCONS_00206649	5.84155	0.00136729	0.0064999	up-regulated	D120 vs. D90
TCONS_00206657	7.55413	1.17947e-07	1.95379e-06	up-regulated	D120 vs. D90
TCONS_00206718	2.96057	5.20899e-06	5.41741e-05	up-regulated	D120 vs. D90
TCONS_00206872	-2.00457	8.92532e-06	8.70111e-05	down-regulated	D120 vs. D90
TCONS_00207333	6.3726	1.12321e-22	1.99004e-20	up-regulated	D120 vs. D90
TCONS_00207484	5.82133	6.06714e-06	6.19639e-05	up-regulated	D120 vs. D90
TCONS_00207501	7.96968	4.6753e-09	1.0134e-07	up-regulated	D120 vs. D90
TCONS_00207614	3.20707	0.000199766	0.00125625	up-regulated	D120 vs. D90
TCONS_00207615	2.82729	0.000337455	0.00195609	up-regulated	D120 vs. D90
TCONS_00209090	6.25225	0.000170665	0.00109006	up-regulated	D120 vs. D90
TCONS_00209399	5.24193	0.00982682	0.0315309	up-regulated	D120 vs. D90
TCONS_00209940	-6.56457	5.17319e-05	0.000400015	down-regulated	D120 vs. D90
TCONS_00211130	4.64072	0.0110965	0.0348907	up-regulated	D120 vs. D90
TCONS_00211311	5.25105	1.44449e-17	1.27963e-15	up-regulated	D120 vs. D90
TCONS_00211433	4.36428	0.0072416	0.0248397	up-regulated	D120 vs. D90
TCONS_00211454	-2.80249	1.30454e-05	0.000120545	down-regulated	D120 vs. D90
TCONS_00211494	6.17291	0.000290057	0.0017155	up-regulated	D120 vs. D90
TCONS_00211509	2.64243	0.0162356	0.0462981	up-regulated	D120 vs. D90
TCONS_00211778	8.00663	6.44763e-09	1.37561e-07	up-regulated	D120 vs. D90
TCONS_00211791	3.92064	0.000280804	0.00167782	up-regulated	D120 vs. D90
TCONS_00211912	5.3681	1.52699e-37	8.88924e-35	up-regulated	D120 vs. D90
TCONS_00212595	4.89741	3.16658e-05	0.000261211	up-regulated	D120 vs. D90
TCONS_00212599	2.62725	0.00269427	0.0112838	up-regulated	D120 vs. D90
TCONS_00212875	-2.20031	0.00255077	0.0107826	down-regulated	D120 vs. D90
TCONS_00213060	-2.48092	0.00061032	0.00325105	down-regulated	D120 vs. D90
TCONS_00213667	4.52028	0.0143658	0.0420549	up-regulated	D120 vs. D90
TCONS_00213673	4.49476	0.000636119	0.00335775	up-regulated	D120 vs. D90
TCONS_00213952	5.57827	0.00927289	0.0301813	up-regulated	D120 vs. D90
TCONS_00214169	5.18052	0.0120592	0.0365362	up-regulated	D120 vs. D90
TCONS_00214247	4.73332	0.00808616	0.0269428	up-regulated	D120 vs. D90
TCONS_00215180	6.94821	3.22037e-07	4.57248e-06	up-regulated	D120 vs. D90
TCONS_00215296	4.01165	5.64795e-12	2.34851e-10	up-regulated	D120 vs. D90
TCONS_00215299	5.07496	1.41479e-05	0.000130141	up-regulated	D120 vs. D90
TCONS_00215301	5.34601	7.97027e-05	0.000590525	up-regulated	D120 vs. D90
TCONS_00215783	6.37387	9.15784e-05	0.000651592	up-regulated	D120 vs. D90
TCONS_00215926	5.73131	0.00171518	0.00778766	up-regulated	D120 vs. D90
TCONS_00215932	5.30506	0.00838426	0.0277997	up-regulated	D120 vs. D90
TCONS_00215962	1.80332	0.000773825	0.00397646	up-regulated	D120 vs. D90
TCONS_00216226	1.20385	0.00521226	0.0191351	up-regulated	D120 vs. D90
TCONS_00216743	7.1326	1.75744e-06	2.0783e-05	up-regulated	D120 vs. D90
TCONS_00216770	7.25648	5.83073e-07	7.86762e-06	up-regulated	D120 vs. D90
TCONS_00217057	4.22617	1.00886e-05	9.74199e-05	up-regulated	D120 vs. D90
TCONS_00217187	7.77725	1.96797e-08	3.85551e-07	up-regulated	D120 vs. D90
TCONS_00217287	5.72951	0.00211075	0.00924872	up-regulated	D120 vs. D90
TCONS_00217435	2.71482	0.0122698	0.0370707	up-regulated	D120 vs. D90
TCONS_00217831	5.52539	0.00388285	0.0152141	up-regulated	D120 vs. D90
TCONS_00217843	7.28867	4.63402e-07	6.39594e-06	up-regulated	D120 vs. D90
TCONS_00217885	6.3248	0.000136816	0.000906544	up-regulated	D120 vs. D90
TCONS_00218187	6.43744	9.81463e-05	0.000686014	up-regulated	D120 vs. D90
TCONS_00218263	6.34466	0.000188688	0.00119767	up-regulated	D120 vs. D90
TCONS_00218265	5.12385	0.0148507	0.0432569	up-regulated	D120 vs. D90
TCONS_00219146	8.45312	2.40179e-10	6.96244e-09	up-regulated	D120 vs. D90
TCONS_00221545	5.76394	0.00155646	0.00719928	up-regulated	D120 vs. D90
TCONS_00221684	4.53857	0.00743019	0.0253373	up-regulated	D120 vs. D90
TCONS_00221755	8.83458	7.62424e-11	2.44636e-09	up-regulated	D120 vs. D90
TCONS_00221769	5.70081	0.00272591	0.0113812	up-regulated	D120 vs. D90
TCONS_00222165	5.60017	0.00300374	0.0123514	up-regulated	D120 vs. D90
TCONS_00222308	1.37919	0.000312951	0.00182443	up-regulated	D120 vs. D90
TCONS_00222316	5.60557	0.00316426	0.0129073	up-regulated	D120 vs. D90
TCONS_00222617	3.1699	0.00203836	0.00901878	up-regulated	D120 vs. D90
TCONS_00222664	5.68506	0.00207808	0.00913502	up-regulated	D120 vs. D90
TCONS_00223084	6.21055	0.000274036	0.00164704	up-regulated	D120 vs. D90
TCONS_00223718	4.34149	0.000473291	0.00260278	up-regulated	D120 vs. D90
TCONS_00223806	2.4246	5.65249e-06	5.81664e-05	up-regulated	D120 vs. D90
TCONS_00223939	4.28402	2.77753e-06	3.08404e-05	up-regulated	D120 vs. D90
TCONS_00224160	-1.65259	0.00036863	0.00209507	down-regulated	D120 vs. D90
TCONS_00224240	5.20097	0.00190804	0.00856308	up-regulated	D120 vs. D90
TCONS_00224245	7.19268	9.99543e-08	1.67619e-06	up-regulated	D120 vs. D90
TCONS_00224265	-1.811	0.000952113	0.00474891	down-regulated	D120 vs. D90
TCONS_00224414	7.33716	2.4202e-10	6.96244e-09	up-regulated	D120 vs. D90
TCONS_00224418	4.97671	2.25985e-11	7.8532e-10	up-regulated	D120 vs. D90
TCONS_00224442	8.38129	2.42618e-10	6.96244e-09	up-regulated	D120 vs. D90
TCONS_00224515	6.16249	0.00042903	0.00239165	up-regulated	D120 vs. D90
TCONS_00224719	6.37004	2.52428e-21	3.95633e-19	up-regulated	D120 vs. D90
TCONS_00224791	8.8472	7.02767e-12	2.80762e-10	up-regulated	D120 vs. D90
TCONS_00224886	9.20053	5.84951e-13	2.77172e-11	up-regulated	D120 vs. D90
TCONS_00225155	6.58263	1.20358e-40	9.80917e-38	up-regulated	D120 vs. D90
TCONS_00225216	2.71555	0.00760729	0.0257687	up-regulated	D120 vs. D90
TCONS_00225513	7.15883	1.54785e-06	1.87165e-05	up-regulated	D120 vs. D90
TCONS_00225939	3.00604	2.31863e-06	2.63923e-05	up-regulated	D120 vs. D90
TCONS_00225940	3.70498	0.00134321	0.00640186	up-regulated	D120 vs. D90
TCONS_00225956	5.58044	0.00309764	0.0126609	up-regulated	D120 vs. D90
TCONS_00226074	7.49363	1.47524e-07	2.33007e-06	up-regulated	D120 vs. D90
TCONS_00226278	6.46123	5.90023e-05	0.000446904	up-regulated	D120 vs. D90
TCONS_00226282	3.67693	1.3815e-08	2.75962e-07	up-regulated	D120 vs. D90
TCONS_00226335	4.956	0.000288097	0.00170698	up-regulated	D120 vs. D90
TCONS_00226499	3.30627	0.0149095	0.0433354	up-regulated	D120 vs. D90
TCONS_00226686	5.11427	0.0152015	0.0438403	up-regulated	D120 vs. D90
TCONS_00226994	4.9385	3.18079e-05	0.000261853	up-regulated	D120 vs. D90
TCONS_00226999	2.62059	2.25424e-05	0.000197549	up-regulated	D120 vs. D90
TCONS_00227590	5.20002	0.0111567	0.0349938	up-regulated	D120 vs. D90
TCONS_00227701	8.12303	2.05217e-09	4.97774e-08	up-regulated	D120 vs. D90
TCONS_00227932	6.99448	4.46628e-06	4.71505e-05	up-regulated	D120 vs. D90
TCONS_00227965	3.52273	7.08444e-05	0.000529708	up-regulated	D120 vs. D90
TCONS_00227998	5.56072	4.6895e-07	6.43425e-06	up-regulated	D120 vs. D90
TCONS_00228639	6.83378	7.81048e-06	7.74397e-05	up-regulated	D120 vs. D90
TCONS_00228685	5.78839	0.00230426	0.0099469	up-regulated	D120 vs. D90
TCONS_00228700	4.06197	1.90036e-07	2.90036e-06	up-regulated	D120 vs. D90
TCONS_00228701	5.45726	4.46263e-05	0.000351745	up-regulated	D120 vs. D90
TCONS_00228711	4.03466	9.21879e-21	1.2954e-18	up-regulated	D120 vs. D90
TCONS_00229224	1.76899	0.00225709	0.00980558	up-regulated	D120 vs. D90
TCONS_00229587	5.19937	0.0114524	0.0355433	up-regulated	D120 vs. D90
TCONS_00229811	2.81105	0.00373623	0.0147961	up-regulated	D120 vs. D90
TCONS_00229841	4.89489	5.853e-05	0.000444981	up-regulated	D120 vs. D90
TCONS_00229861	3.88301	0.00207192	0.00911778	up-regulated	D120 vs. D90
TCONS_00229968	3.18745	0.0117672	0.0362169	up-regulated	D120 vs. D90
TCONS_00230242	1.69825	0.00770695	0.0260058	up-regulated	D120 vs. D90
TCONS_00230356	1.28768	0.00145341	0.0067942	up-regulated	D120 vs. D90
TCONS_00230406	5.4982	8.46931e-11	2.67538e-09	up-regulated	D120 vs. D90
TCONS_00230480	1.81338	0.00158539	0.00730822	up-regulated	D120 vs. D90
TCONS_00230663	4.87538	0.000768187	0.00396249	up-regulated	D120 vs. D90
TCONS_00230872	1.71553	0.00230328	0.0099469	up-regulated	D120 vs. D90
TCONS_00231064	1.43048	0.00423863	0.0164636	up-regulated	D120 vs. D90
TCONS_00231077	3.56452	0.00229675	0.009944	up-regulated	D120 vs. D90
TCONS_00231086	7.73195	2.62278e-09	6.17794e-08	up-regulated	D120 vs. D90
TCONS_00231234	5.82001	0.00128709	0.00617048	up-regulated	D120 vs. D90
TCONS_00231475	-5.42843	0.0100103	0.0320189	down-regulated	D120 vs. D90
TCONS_00231914	4.82283	0.000958222	0.00477354	up-regulated	D120 vs. D90
TCONS_00232083	5.40284	0.00692273	0.0239678	up-regulated	D120 vs. D90
TCONS_00232291	3.30904	0.00847263	0.0280131	up-regulated	D120 vs. D90
TCONS_00232835	2.72851	2.54524e-08	4.75773e-07	up-regulated	D120 vs. D90
TCONS_00232867	5.78968	0.0049361	0.0183863	up-regulated	D120 vs. D90
TCONS_00233346	5.36669	0.00748131	0.0254265	up-regulated	D120 vs. D90
TCONS_00233817	-2.38631	0.00472358	0.0178558	down-regulated	D120 vs. D90
TCONS_00234177	5.20779	0.011838	0.0363111	up-regulated	D120 vs. D90
TCONS_00234180	9.04343	1.6187e-12	7.48361e-11	up-regulated	D120 vs. D90
TCONS_00234185	6.34736	0.00012609	0.000849284	up-regulated	D120 vs. D90
TCONS_00234186	5.46486	0.00539184	0.0195478	up-regulated	D120 vs. D90
TCONS_00234187	5.25508	0.0101839	0.0325231	up-regulated	D120 vs. D90
TCONS_00234252	5.26187	0.00980006	0.0314698	up-regulated	D120 vs. D90
TCONS_00234745	2.76081	0.0107236	0.0338749	up-regulated	D120 vs. D90
TCONS_00235055	-1.18467	0.0011593	0.00565092	down-regulated	D120 vs. D90
TCONS_00235219	2.60016	0.00757055	0.0256655	up-regulated	D120 vs. D90
TCONS_00235797	5.45652	0.00788759	0.0264108	up-regulated	D120 vs. D90
TCONS_00236036	3.09822	0.00136857	0.0064999	up-regulated	D120 vs. D90
TCONS_00236038	5.77699	0.00144086	0.00676621	up-regulated	D120 vs. D90
TCONS_00236141	4.56453	0.00336307	0.0136092	up-regulated	D120 vs. D90
TCONS_00236987	6.30862	0.000238731	0.0014651	up-regulated	D120 vs. D90
TCONS_00237006	3.23479	9.03107e-05	0.000645642	up-regulated	D120 vs. D90
TCONS_00238805	5.35388	0.0079936	0.0266999	up-regulated	D120 vs. D90
TCONS_00239302	5.49421	0.00428649	0.0166198	up-regulated	D120 vs. D90
TCONS_00239373	4.18401	0.00139184	0.00659508	up-regulated	D120 vs. D90
TCONS_00239428	5.3182	0.00764599	0.0258765	up-regulated	D120 vs. D90
TCONS_00239513	7.40673	2.46629e-07	3.61516e-06	up-regulated	D120 vs. D90
TCONS_00239696	5.41412	0.00605271	0.0215401	up-regulated	D120 vs. D90
TCONS_00240430	3.53707	7.85829e-06	7.77245e-05	up-regulated	D120 vs. D90
TCONS_00240456	3.19514	2.51245e-09	5.95247e-08	up-regulated	D120 vs. D90
TCONS_00240828	2.64992	4.16575e-06	4.4555e-05	up-regulated	D120 vs. D90
TCONS_00241007	5.53259	0.00456697	0.0174418	up-regulated	D120 vs. D90
TCONS_00241326	5.52355	0.0105371	0.0334675	up-regulated	D120 vs. D90
TCONS_00241505	2.20913	7.91269e-05	0.000587326	up-regulated	D120 vs. D90
TCONS_00241604	4.78992	0.00786774	0.0263877	up-regulated	D120 vs. D90
TCONS_00242196	9.65198	1.98508e-14	1.1556e-12	up-regulated	D120 vs. D90
TCONS_00242220	6.37331	0.000111526	0.000763074	up-regulated	D120 vs. D90
TCONS_00242490	5.45161	0.00581872	0.0207994	up-regulated	D120 vs. D90
TCONS_00243286	-1.88483	4.34041e-13	2.15697e-11	down-regulated	D120 vs. D90
TCONS_00243437	5.3964	0.00702229	0.0242363	up-regulated	D120 vs. D90
TCONS_00243713	5.62578	0.00282377	0.0117178	up-regulated	D120 vs. D90
TCONS_00243753	7.11358	1.53532e-06	1.86204e-05	up-regulated	D120 vs. D90
TCONS_00244388	4.41842	0.00536668	0.0194739	up-regulated	D120 vs. D90
TCONS_00244694	1.53632	0.0153152	0.0441368	up-regulated	D120 vs. D90
TCONS_00245055	4.47929	0.000163128	0.00105181	up-regulated	D120 vs. D90
TCONS_00245087	5.36797	0.000920576	0.00460853	up-regulated	D120 vs. D90
TCONS_00245178	4.56776	0.0134114	0.0399792	up-regulated	D120 vs. D90
TCONS_00245565	8.20004	9.69852e-10	2.50136e-08	up-regulated	D120 vs. D90
TCONS_00246177	5.32857	0.0156879	0.0451152	up-regulated	D120 vs. D90
TCONS_00247259	8.09548	3.95628e-09	8.80974e-08	up-regulated	D120 vs. D90
TCONS_00247274	-2.43603	1.75954e-06	2.0783e-05	down-regulated	D120 vs. D90
TCONS_00247314	4.39808	1.69023e-06	2.01394e-05	up-regulated	D120 vs. D90
TCONS_00247863	6.03834	0.000773783	0.00397646	up-regulated	D120 vs. D90
TCONS_00248056	5.49785	5.96734e-10	1.61039e-08	up-regulated	D120 vs. D90
TCONS_00248129	-2.51257	7.58549e-07	9.87568e-06	down-regulated	D120 vs. D90
TCONS_00248535	6.137	0.000916599	0.00460853	up-regulated	D120 vs. D90
TCONS_00248696	5.3378	0.0084544	0.0280095	up-regulated	D120 vs. D90
TCONS_00249416	3.8132	4.32774e-06	4.59737e-05	up-regulated	D120 vs. D90
TCONS_00249417	2.6963	1.37625e-09	3.50514e-08	up-regulated	D120 vs. D90
TCONS_00249418	5.09277	0.00233936	0.0100497	up-regulated	D120 vs. D90
TCONS_00249420	4.6129	5.16718e-13	2.5067e-11	up-regulated	D120 vs. D90
TCONS_00250762	6.83066	1.80842e-05	0.000162678	up-regulated	D120 vs. D90
TCONS_00250807	8.89778	2.27405e-11	7.8532e-10	up-regulated	D120 vs. D90
TCONS_00251176	3.67235	0.00271211	0.0113469	up-regulated	D120 vs. D90
TCONS_00251258	7.51325	2.47891e-07	3.62063e-06	up-regulated	D120 vs. D90
TCONS_00251270	5.46875	3.50222e-07	4.94687e-06	up-regulated	D120 vs. D90
TCONS_00251704	3.03241	0.00155975	0.00720631	up-regulated	D120 vs. D90
TCONS_00252579	3.08607	0.00302058	0.0124081	up-regulated	D120 vs. D90
TCONS_00253123	7.56098	9.54372e-08	1.60705e-06	up-regulated	D120 vs. D90
TCONS_00253155	-2.416	2.15451e-05	0.000190035	down-regulated	D120 vs. D90
TCONS_00253223	-2.34086	0.00766426	0.0258971	down-regulated	D120 vs. D90
TCONS_00253506	-1.33148	0.00466665	0.0177063	down-regulated	D120 vs. D90
TCONS_00253516	-1.30005	0.000265205	0.00160343	down-regulated	D120 vs. D90
TCONS_00253658	4.29614	0.00170168	0.00774789	up-regulated	D120 vs. D90
TCONS_00254009	5.90398	0.000860222	0.00434914	up-regulated	D120 vs. D90
TCONS_00254063	6.63121	2.0119e-06	2.34242e-05	up-regulated	D120 vs. D90
TCONS_00254431	3.49697	0.00178451	0.00806197	up-regulated	D120 vs. D90
TCONS_00254832	7.50988	1.38967e-07	2.22075e-06	up-regulated	D120 vs. D90
TCONS_00255569	-2.05095	1.5234e-05	0.000138335	down-regulated	D120 vs. D90
TCONS_00255701	4.17096	0.000298006	0.00175234	up-regulated	D120 vs. D90
TCONS_00255712	4.35347	0.0010475	0.00515529	up-regulated	D120 vs. D90
TCONS_00255866	5.45684	0.000639183	0.00336956	up-regulated	D120 vs. D90
TCONS_00255990	4.30929	3.27227e-05	0.000267761	up-regulated	D120 vs. D90
TCONS_00256017	7.3811	3.71521e-07	5.20258e-06	up-regulated	D120 vs. D90
TCONS_00256425	3.44472	0.00234041	0.0100497	up-regulated	D120 vs. D90
TCONS_00257116	5.92079	0.00145239	0.0067942	up-regulated	D120 vs. D90
TCONS_00257122	5.93374	0.000779723	0.00399669	up-regulated	D120 vs. D90
TCONS_00257278	6.83984	9.79545e-06	9.50392e-05	up-regulated	D120 vs. D90
TCONS_00257774	5.26623	0.00956681	0.0309157	up-regulated	D120 vs. D90
TCONS_00258314	6.82598	1.02291e-05	9.83099e-05	up-regulated	D120 vs. D90
TCONS_00258380	6.05961	3.9832e-05	0.000320148	up-regulated	D120 vs. D90
TCONS_00259456	2.78076	3.80142e-18	3.62096e-16	up-regulated	D120 vs. D90
TCONS_00259582	6.30439	0.000173218	0.00110291	up-regulated	D120 vs. D90
TCONS_00259625	7.57677	8.30015e-08	1.41519e-06	up-regulated	D120 vs. D90
TCONS_00259749	5.58689	0.00318297	0.0129447	up-regulated	D120 vs. D90
TCONS_00259751	5.27654	8.36797e-05	0.000610009	up-regulated	D120 vs. D90
TCONS_00261554	4.64609	0.0115989	0.0358616	up-regulated	D120 vs. D90
TCONS_00261789	5.50478	0.00493538	0.0183863	up-regulated	D120 vs. D90
TCONS_00263467	3.83543	8.51006e-05	0.000619259	up-regulated	D120 vs. D90
TCONS_00263781	2.43434	0.0179223	0.0499887	up-regulated	D120 vs. D90
TCONS_00264268	6.99185	4.23117e-06	4.51362e-05	up-regulated	D120 vs. D90
TCONS_00264754	5.2817	0.0130761	0.0391515	up-regulated	D120 vs. D90
TCONS_00265442	7.05586	2.02374e-06	2.3495e-05	up-regulated	D120 vs. D90
TCONS_00265472	5.8141	0.0013022	0.00623554	up-regulated	D120 vs. D90
TCONS_00266519	3.17141	0.00911735	0.0297702	up-regulated	D120 vs. D90
TCONS_00267003	1.43832	0.00128394	0.00616986	up-regulated	D120 vs. D90
TCONS_00267057	6.13276	3.19215e-05	0.000262258	up-regulated	D120 vs. D90
TCONS_00267172	4.85486	0.00529427	0.0192844	up-regulated	D120 vs. D90
TCONS_00267433	5.41795	0.00704797	0.0242982	up-regulated	D120 vs. D90
TCONS_00267524	2.15631	0.000264264	0.00160011	up-regulated	D120 vs. D90
TCONS_00267777	4.62998	0.0105967	0.0336042	up-regulated	D120 vs. D90
TCONS_00267822	3.20342	0.000453714	0.00250187	up-regulated	D120 vs. D90
TCONS_00269284	3.63103	0.0170031	0.0480498	up-regulated	D120 vs. D90
TCONS_00269320	2.69825	0.00490052	0.0183189	up-regulated	D120 vs. D90
TCONS_00269799	5.65964	0.00291295	0.0120388	up-regulated	D120 vs. D90
TCONS_00269854	6.20701	0.000249138	0.00151755	up-regulated	D120 vs. D90
TCONS_00269905	5.92508	0.000972905	0.00482897	up-regulated	D120 vs. D90
TCONS_00269951	6.21954	0.000199519	0.00125625	up-regulated	D120 vs. D90
TCONS_00270209	6.47634	1.68709e-06	2.01394e-05	up-regulated	D120 vs. D90
TCONS_00270860	3.43025	0.000186668	0.0011867	up-regulated	D120 vs. D90
TCONS_00271142	6.36732	1.25532e-07	2.03684e-06	up-regulated	D120 vs. D90
TCONS_00271289	4.65075	0.00237042	0.0101571	up-regulated	D120 vs. D90
TCONS_00271429	-1.88914	0.00971572	0.031273	down-regulated	D120 vs. D90
TCONS_00271628	-1.84903	0.0108366	0.0341526	down-regulated	D120 vs. D90
TCONS_00271716	2.3813	0.001201	0.00584018	up-regulated	D120 vs. D90
TCONS_00271881	-2.52412	0.000760163	0.00393604	down-regulated	D120 vs. D90
TCONS_00272761	2.76873	0.00054752	0.00296301	up-regulated	D120 vs. D90
TCONS_00272896	7.88277	9.37632e-10	2.43366e-08	up-regulated	D120 vs. D90
TCONS_00272982	3.06537	0.000203443	0.00127543	up-regulated	D120 vs. D90
TCONS_00273187	5.41498	0.0140267	0.0414496	up-regulated	D120 vs. D90
TCONS_00273517	-2.16361	0.00577033	0.0206626	down-regulated	D120 vs. D90
TCONS_00274085	5.54283	0.00364329	0.0144843	up-regulated	D120 vs. D90
TCONS_00274311	7.70009	3.43658e-09	7.86746e-08	up-regulated	D120 vs. D90
TCONS_00274611	5.36612	0.00668653	0.0233085	up-regulated	D120 vs. D90
TCONS_00274817	5.85027	0.00153425	0.0071208	up-regulated	D120 vs. D90
TCONS_00274959	2.31377	0.00481889	0.0181103	up-regulated	D120 vs. D90
TCONS_00275665	2.54438	2.77195e-09	6.49177e-08	up-regulated	D120 vs. D90
TCONS_00275885	3.69404	6.84816e-08	1.17748e-06	up-regulated	D120 vs. D90
TCONS_00276251	3.24176	0.00597437	0.0213184	up-regulated	D120 vs. D90
TCONS_00276278	4.01896	0.0122041	0.0369478	up-regulated	D120 vs. D90
TCONS_00276577	5.31648	0.0120448	0.0365362	up-regulated	D120 vs. D90
TCONS_00276977	3.15213	0.000105034	0.000722998	up-regulated	D120 vs. D90
TCONS_00277417	4.2003	0.00797069	0.0266452	up-regulated	D120 vs. D90
TCONS_00277455	-1.51185	0.00100691	0.00497353	down-regulated	D120 vs. D90
TCONS_00277523	5.2305	0.0120527	0.0365362	up-regulated	D120 vs. D90
TCONS_00277542	8.88696	6.01422e-12	2.42653e-10	up-regulated	D120 vs. D90
TCONS_00278066	7.69761	4.24131e-08	7.54732e-07	up-regulated	D120 vs. D90
TCONS_00278097	5.68561	1.23736e-05	0.000115648	up-regulated	D120 vs. D90
TCONS_00278845	3.46972	0.00495873	0.0184201	up-regulated	D120 vs. D90
TCONS_00278898	4.41576	3.65306e-07	5.13318e-06	up-regulated	D120 vs. D90
TCONS_00278973	5.37073	0.0070185	0.0242363	up-regulated	D120 vs. D90
TCONS_00279065	3.3465	0.00702407	0.0242363	up-regulated	D120 vs. D90
TCONS_00279103	3.71972	0.00277802	0.0115727	up-regulated	D120 vs. D90
TCONS_00279105	4.36418	0.00569827	0.0204544	up-regulated	D120 vs. D90
TCONS_00279381	9.04741	1.63446e-12	7.48361e-11	up-regulated	D120 vs. D90
TCONS_00279383	5.51595	0.00522318	0.0191579	up-regulated	D120 vs. D90
TCONS_00279578	6.18706	0.00027883	0.00166848	up-regulated	D120 vs. D90
TCONS_00279762	6.35784	0.000118414	0.00080541	up-regulated	D120 vs. D90
TCONS_00279763	5.61442	0.000393835	0.00221057	up-regulated	D120 vs. D90
TCONS_00279999	5.6411	0.00316977	0.0129168	up-regulated	D120 vs. D90
TCONS_00280044	2.49785	0.000361147	0.00206696	up-regulated	D120 vs. D90
TCONS_00280047	3.71721	0.00198693	0.0088489	up-regulated	D120 vs. D90
TCONS_00280515	-2.73593	5.87135e-11	1.91406e-09	down-regulated	D120 vs. D90
TCONS_00280603	6.28881	0.000142738	0.000936457	up-regulated	D120 vs. D90
TCONS_00280726	6.4064	8.28663e-05	0.000606772	up-regulated	D120 vs. D90
TCONS_00280789	5.48046	0.00495717	0.0184201	up-regulated	D120 vs. D90
TCONS_00281744	5.6131	0.00342548	0.0137797	up-regulated	D120 vs. D90
TCONS_00282115	5.99283	0.000765418	0.0039532	up-regulated	D120 vs. D90
TCONS_00282191	5.83852	0.00154308	0.00715365	up-regulated	D120 vs. D90
TCONS_00282200	5.56064	9.75448e-09	1.99746e-07	up-regulated	D120 vs. D90
TCONS_00282798	6.13545	0.000341497	0.0019767	up-regulated	D120 vs. D90
TCONS_00282823	5.80904	0.00132223	0.00631664	up-regulated	D120 vs. D90
TCONS_00283001	6.33973	0.000111605	0.000763074	up-regulated	D120 vs. D90
TCONS_00284617	5.45392	0.00666779	0.023283	up-regulated	D120 vs. D90
TCONS_00284705	-2.2555	1.1171e-05	0.000106111	down-regulated	D120 vs. D90
TCONS_00286754	5.39365	0.000861668	0.00435105	up-regulated	D120 vs. D90
TCONS_00287174	7.35441	1.81294e-18	1.80189e-16	up-regulated	D120 vs. D90
TCONS_00287760	1.32238	0.00279484	0.0116214	up-regulated	D120 vs. D90
TCONS_00288157	4.48355	3.7078e-05	0.000300383	up-regulated	D120 vs. D90
TCONS_00288762	3.60443	0.000832707	0.00423433	up-regulated	D120 vs. D90
TCONS_00288979	4.80739	0.00726119	0.0248859	up-regulated	D120 vs. D90
TCONS_00289175	4.68697	0.00292392	0.0120719	up-regulated	D120 vs. D90
TCONS_00289336	5.73624	0.00174347	0.00789405	up-regulated	D120 vs. D90
TCONS_00289398	5.32564	1.20376e-07	1.97971e-06	up-regulated	D120 vs. D90
TCONS_00290105	-1.40498	0.000271952	0.00163694	down-regulated	D120 vs. D90
TCONS_00290107	-1.42325	0.000679498	0.00354994	down-regulated	D120 vs. D90
TCONS_00290120	-1.60765	0.00141102	0.00664905	down-regulated	D120 vs. D90
TCONS_00290121	-1.44187	0.000365971	0.00208578	down-regulated	D120 vs. D90
TCONS_00290128	-1.64738	0.0126546	0.0380852	down-regulated	D120 vs. D90
TCONS_00290466	3.18502	6.13756e-05	0.000463158	up-regulated	D120 vs. D90
TCONS_00290474	2.28146	0.0131003	0.039195	up-regulated	D120 vs. D90
TCONS_00290480	2.54415	2.68413e-05	0.000226926	up-regulated	D120 vs. D90
TCONS_00291477	5.83935	0.00147139	0.00686817	up-regulated	D120 vs. D90
TCONS_00291870	-4.2192	9.24236e-10	2.41427e-08	down-regulated	D120 vs. D90
TCONS_00291899	-2.95419	8.14135e-12	3.22097e-10	down-regulated	D120 vs. D90
TCONS_00292368	5.14723	0.00412055	0.0160835	up-regulated	D120 vs. D90
TCONS_00292574	5.87291	0.00144767	0.00678853	up-regulated	D120 vs. D90
TCONS_00292694	8.62391	4.52284e-11	1.49842e-09	up-regulated	D120 vs. D90
TCONS_00293396	4.14958	9.29213e-05	0.00065398	up-regulated	D120 vs. D90
TCONS_00294001	5.36869	1.4798e-17	1.28302e-15	up-regulated	D120 vs. D90
TCONS_00294133	5.35508	0.00770919	0.0260058	up-regulated	D120 vs. D90
TCONS_00294206	2.84864	0.00393131	0.0153891	up-regulated	D120 vs. D90
TCONS_00294336	-1.53149	0.00127524	0.00614984	down-regulated	D120 vs. D90
TCONS_00294694	-1.19084	9.2231e-05	0.000651592	down-regulated	D120 vs. D90
TCONS_00294783	6.52523	9.16226e-05	0.000651592	up-regulated	D120 vs. D90
TCONS_00294784	5.25441	0.0103385	0.0329137	up-regulated	D120 vs. D90
TCONS_00295134	7.11287	1.83115e-06	2.15042e-05	up-regulated	D120 vs. D90
TCONS_00295790	4.08771	0.0134264	0.0399946	up-regulated	D120 vs. D90
TCONS_00296309	6.29716	0.00016558	0.00106258	up-regulated	D120 vs. D90
TCONS_00296348	4.91953	0.000652927	0.00342736	up-regulated	D120 vs. D90
TCONS_00296516	5.37243	0.0062599	0.0220667	up-regulated	D120 vs. D90
TCONS_00296835	5.11636	0.0164417	0.0468532	up-regulated	D120 vs. D90
TCONS_00296925	7.86707	9.47932e-09	1.95092e-07	up-regulated	D120 vs. D90
TCONS_00297109	6.26189	0.000170308	0.00108949	up-regulated	D120 vs. D90
TCONS_00297641	5.48256	0.00460908	0.0175369	up-regulated	D120 vs. D90
TCONS_00298025	6.04526	0.000517077	0.00282085	up-regulated	D120 vs. D90
TCONS_00298081	5.80314	0.00264307	0.0111151	up-regulated	D120 vs. D90
TCONS_00298096	5.21549	0.00167584	0.00764899	up-regulated	D120 vs. D90
TCONS_00298628	3.13871	4.26816e-05	0.00033838	up-regulated	D120 vs. D90
TCONS_00299489	6.38485	0.000159517	0.00103344	up-regulated	D120 vs. D90
TCONS_00299748	5.13204	0.0142305	0.0418065	up-regulated	D120 vs. D90
TCONS_00299822	5.49958	0.0053065	0.0193071	up-regulated	D120 vs. D90
TCONS_00300166	6.03502	0.000761469	0.0039378	up-regulated	D120 vs. D90
TCONS_00300174	4.29376	1.21974e-19	1.50619e-17	up-regulated	D120 vs. D90
TCONS_00300395	5.37875	0.00661458	0.023117	up-regulated	D120 vs. D90
TCONS_00300417	5.30738	0.0112353	0.0350833	up-regulated	D120 vs. D90
TCONS_00300521	5.88768	1.71147e-11	6.11774e-10	up-regulated	D120 vs. D90
TCONS_00300524	5.42082	0.0056184	0.0202611	up-regulated	D120 vs. D90
TCONS_00301370	-3.89259	0.000251752	0.00152889	down-regulated	D120 vs. D90
TCONS_00301592	5.77615	0.00159164	0.00732872	up-regulated	D120 vs. D90
TCONS_00301980	1.69812	0.00545532	0.019714	up-regulated	D120 vs. D90
TCONS_00302103	4.5381	0.0150482	0.043614	up-regulated	D120 vs. D90
TCONS_00302105	5.24698	0.00197169	0.00880027	up-regulated	D120 vs. D90
TCONS_00302624	7.36199	3.01912e-07	4.34731e-06	up-regulated	D120 vs. D90
TCONS_00303225	4.15587	2.88596e-08	5.3214e-07	up-regulated	D120 vs. D90
TCONS_00303228	3.14284	1.13446e-10	3.44994e-09	up-regulated	D120 vs. D90
TCONS_00303357	6.21443	0.000209288	0.00130206	up-regulated	D120 vs. D90
TCONS_00303368	5.5122	0.00636601	0.022363	up-regulated	D120 vs. D90
TCONS_00303394	5.25106	8.02813e-05	0.00059362	up-regulated	D120 vs. D90
TCONS_00303448	5.34627	0.000206903	0.00129116	up-regulated	D120 vs. D90
TCONS_00303519	5.23368	0.0118443	0.0363111	up-regulated	D120 vs. D90
TCONS_00303532	3.30727	0.00019468	0.00123378	up-regulated	D120 vs. D90
TCONS_00303869	5.5632	0.00440959	0.016984	up-regulated	D120 vs. D90
TCONS_00304989	2.72287	1.4576e-06	1.7837e-05	up-regulated	D120 vs. D90
TCONS_00305048	5.85027	0.00153425	0.0071208	up-regulated	D120 vs. D90
TCONS_00305359	6.45634	8.69076e-05	0.000630157	up-regulated	D120 vs. D90
TCONS_00305372	6.10112	0.000444488	0.00246434	up-regulated	D120 vs. D90
TCONS_00305376	5.62433	0.0027455	0.0114513	up-regulated	D120 vs. D90
TCONS_00305434	6.91044	5.5243e-06	5.69912e-05	up-regulated	D120 vs. D90
TCONS_00306012	-3.63882	0.00863597	0.0284382	down-regulated	D120 vs. D90
TCONS_00306773	5.58281	1.85015e-09	4.53855e-08	up-regulated	D120 vs. D90
TCONS_00307100	6.80381	9.48962e-06	9.22916e-05	up-regulated	D120 vs. D90
TCONS_00307506	9.66346	4.12867e-15	2.58836e-13	up-regulated	D120 vs. D90
TCONS_00307613	5.18248	0.0126684	0.0380985	up-regulated	D120 vs. D90
TCONS_00307614	8.12895	3.47276e-09	7.87694e-08	up-regulated	D120 vs. D90
TCONS_00308467	7.6954	2.93571e-08	5.38874e-07	up-regulated	D120 vs. D90
TCONS_00308476	6.0502	5.72895e-05	0.000437181	up-regulated	D120 vs. D90
TCONS_00308740	4.07035	0.014258	0.0418295	up-regulated	D120 vs. D90
TCONS_00308799	8.06021	1.13117e-18	1.18193e-16	up-regulated	D120 vs. D90
TCONS_00309027	5.53975	0.00351388	0.0140644	up-regulated	D120 vs. D90
TCONS_00309855	5.83987	0.000120656	0.000815378	up-regulated	D120 vs. D90
TCONS_00309905	3.599	6.26957e-27	1.59678e-24	up-regulated	D120 vs. D90
TCONS_00310224	-3.2404	2.80202e-05	0.000235427	down-regulated	D120 vs. D90
TCONS_00310703	2.03102	4.18945e-05	0.000333367	up-regulated	D120 vs. D90
TCONS_00310966	-5.42355	0.00884195	0.0289871	down-regulated	D120 vs. D90
TCONS_00310973	-1.33704	0.00228853	0.00992104	down-regulated	D120 vs. D90
TCONS_00311123	1.43382	0.00163241	0.00749109	up-regulated	D120 vs. D90
TCONS_00311178	4.75135	0.00132645	0.00632937	up-regulated	D120 vs. D90
TCONS_00311381	3.2007	0.00602035	0.0214449	up-regulated	D120 vs. D90
TCONS_00311534	-2.61062	0.00013188	0.000878124	down-regulated	D120 vs. D90
TCONS_00311577	6.76493	1.49377e-05	0.000136177	up-regulated	D120 vs. D90
TCONS_00312068	5.66926	0.0024428	0.0104126	up-regulated	D120 vs. D90
TCONS_00312436	4.5991	2.03745e-06	2.35869e-05	up-regulated	D120 vs. D90
TCONS_00312753	-1.50878	0.00523153	0.0191713	down-regulated	D120 vs. D90
TCONS_00312840	5.04479	1.12483e-05	0.000106598	up-regulated	D120 vs. D90
TCONS_00313665	2.95368	0.0170395	0.0480749	up-regulated	D120 vs. D90
TCONS_00313713	-1.59854	0.000160398	0.00103749	down-regulated	D120 vs. D90
TCONS_00313997	6.31446	1.37592e-05	0.000126852	up-regulated	D120 vs. D90
TCONS_00314019	5.18051	2.17302e-08	4.13788e-07	up-regulated	D120 vs. D90
TCONS_00314370	3.02648	2.70653e-05	0.000228346	up-regulated	D120 vs. D90
TCONS_00314627	4.45421	7.63172e-19	8.18402e-17	up-regulated	D120 vs. D90
TCONS_00314643	7.4691	1.98792e-07	3.00028e-06	up-regulated	D120 vs. D90
TCONS_00315670	5.53127	2.31606e-05	0.000202098	up-regulated	D120 vs. D90
TCONS_00315676	5.54741	0.00361246	0.0143898	up-regulated	D120 vs. D90
TCONS_00316167	4.13299	2.86085e-07	4.14874e-06	up-regulated	D120 vs. D90
TCONS_00316997	5.48168	4.17594e-05	0.000333013	up-regulated	D120 vs. D90
TCONS_00318015	-1.74331	8.70662e-05	0.000630186	down-regulated	D120 vs. D90
TCONS_00318528	3.98969	2.87884e-05	0.000240888	up-regulated	D120 vs. D90
TCONS_00318637	6.7127	1.56946e-05	0.000142123	up-regulated	D120 vs. D90
TCONS_00319085	6.59231	2.99457e-05	0.000250059	up-regulated	D120 vs. D90
TCONS_00319365	4.99825	0.00619712	0.0219212	up-regulated	D120 vs. D90
TCONS_00319522	-2.46934	0.0028141	0.0116896	down-regulated	D120 vs. D90
TCONS_00319540	-1.97436	0.0124569	0.0375181	down-regulated	D120 vs. D90
TCONS_00319543	-2.11037	0.000564571	0.00303914	down-regulated	D120 vs. D90
TCONS_00319548	-3.1235	4.9216e-14	2.67407e-12	down-regulated	D120 vs. D90
TCONS_00319577	5.59386	0.00434682	0.0167898	up-regulated	D120 vs. D90
TCONS_00319584	4.3751	0.000927034	0.00463517	up-regulated	D120 vs. D90
TCONS_00319642	5.80131	0.00178662	0.00806255	up-regulated	D120 vs. D90
TCONS_00319874	5.68183	0.00209649	0.00920602	up-regulated	D120 vs. D90
TCONS_00321271	6.31822	0.000129342	0.000865464	up-regulated	D120 vs. D90
TCONS_00321646	-2.06137	2.17818e-07	3.26326e-06	down-regulated	D120 vs. D90
TCONS_00321698	5.00459	0.003481	0.0139617	up-regulated	D120 vs. D90
TCONS_00322126	5.61753	0.00314008	0.0128215	up-regulated	D120 vs. D90
TCONS_00322272	4.38245	1.33189e-07	2.13679e-06	up-regulated	D120 vs. D90
TCONS_00322747	-1.96712	0.00738266	0.0252174	down-regulated	D120 vs. D90
TCONS_00323053	1.04473	0.0148689	0.0432792	up-regulated	D120 vs. D90
TCONS_00323601	-2.4199	7.07196e-11	2.28716e-09	down-regulated	D120 vs. D90
TCONS_00323805	5.36428	0.00963302	0.031079	up-regulated	D120 vs. D90
TCONS_00323962	5.70763	0.00249839	0.0106162	up-regulated	D120 vs. D90
TCONS_00323970	4.68785	3.88002e-12	1.68203e-10	up-regulated	D120 vs. D90
TCONS_00324383	2.41264	4.50133e-05	0.000353428	up-regulated	D120 vs. D90
TCONS_00324939	7.04993	3.12424e-06	3.40409e-05	up-regulated	D120 vs. D90
TCONS_00325010	5.60953	0.00480093	0.0180644	up-regulated	D120 vs. D90
TCONS_00325222	5.83595	0.0023176	0.00998332	up-regulated	D120 vs. D90
TCONS_00325426	3.55731	0.000298899	0.00175507	up-regulated	D120 vs. D90
TCONS_00325493	3.92679	2.19051e-16	1.59399e-14	up-regulated	D120 vs. D90
TCONS_00325510	4.56741	7.65963e-14	4.10697e-12	up-regulated	D120 vs. D90
TCONS_00325515	5.58911	1.64167e-07	2.54366e-06	up-regulated	D120 vs. D90
TCONS_00325531	3.63539	0.000434439	0.00241673	up-regulated	D120 vs. D90
TCONS_00325533	4.71173	3.82089e-18	3.62096e-16	up-regulated	D120 vs. D90
TCONS_00325541	3.32957	1.1297e-08	2.29031e-07	up-regulated	D120 vs. D90
TCONS_00325572	3.86113	4.24919e-15	2.62355e-13	up-regulated	D120 vs. D90
TCONS_00325573	3.74679	1.24064e-11	4.59601e-10	up-regulated	D120 vs. D90
TCONS_00325757	3.09493	7.93421e-09	1.66659e-07	up-regulated	D120 vs. D90
TCONS_00326058	7.12029	1.29816e-06	1.62769e-05	up-regulated	D120 vs. D90
TCONS_00326658	6.8831	7.35176e-06	7.34275e-05	up-regulated	D120 vs. D90
TCONS_00328146	3.27913	5.64457e-19	6.57189e-17	up-regulated	D120 vs. D90
TCONS_00328768	8.3739	2.82108e-10	7.98327e-09	up-regulated	D120 vs. D90
TCONS_00329141	7.73698	5.58026e-08	9.71776e-07	up-regulated	D120 vs. D90
TCONS_00330292	5.3116	0.0111215	0.0349152	up-regulated	D120 vs. D90
TCONS_00330429	5.87249	0.00383231	0.0151032	up-regulated	D120 vs. D90
TCONS_00330708	5.50821	0.0110053	0.0346306	up-regulated	D120 vs. D90
TCONS_00330910	-6.35823	0.000361127	0.00206696	down-regulated	D120 vs. D90
TCONS_00331285	1.54319	8.24272e-05	0.000606301	up-regulated	D120 vs. D90
TCONS_00331522	1.75018	0.00135816	0.00646555	up-regulated	D120 vs. D90
TCONS_00331677	2.09979	1.43252e-08	2.84756e-07	up-regulated	D120 vs. D90
TCONS_00332125	3.7874	7.94211e-10	2.1153e-08	up-regulated	D120 vs. D90
TCONS_00332244	5.16863	0.0131557	0.0393319	up-regulated	D120 vs. D90
TCONS_00332326	1.99961	0.00471922	0.0178558	up-regulated	D120 vs. D90
TCONS_00332353	3.18497	0.00563868	0.0202994	up-regulated	D120 vs. D90
TCONS_00332445	5.56476	0.00470549	0.0178205	up-regulated	D120 vs. D90
TCONS_00332620	5.86336	0.00035588	0.00204255	up-regulated	D120 vs. D90
TCONS_00332727	6.31344	0.000127209	0.000855406	up-regulated	D120 vs. D90
TCONS_00333275	3.96684	6.27349e-07	8.3818e-06	up-regulated	D120 vs. D90
TCONS_00333714	3.3615	1.92819e-05	0.00017269	up-regulated	D120 vs. D90
TCONS_00333859	6.16426	0.000602992	0.00322044	up-regulated	D120 vs. D90
TCONS_00333902	4.13674	6.23006e-05	0.000469269	up-regulated	D120 vs. D90
TCONS_00334309	6.69093	2.21867e-05	0.000195271	up-regulated	D120 vs. D90
TCONS_00334518	-3.13341	1.48053e-11	5.38674e-10	down-regulated	D120 vs. D90
TCONS_00334903	5.20908	0.0118717	0.0363111	up-regulated	D120 vs. D90
TCONS_00335171	4.56972	1.33827e-11	4.91302e-10	up-regulated	D120 vs. D90
TCONS_00335813	4.46426	2.05896e-05	0.000182794	up-regulated	D120 vs. D90
TCONS_00335966	5.43405	0.00545703	0.019714	up-regulated	D120 vs. D90
TCONS_00336124	4.82867	4.20393e-24	7.78683e-22	up-regulated	D120 vs. D90
TCONS_00336301	2.7996	4.77024e-05	0.000373104	up-regulated	D120 vs. D90
TCONS_00336453	3.08194	9.36501e-05	0.000657973	up-regulated	D120 vs. D90
TCONS_00336956	-1.28333	0.00288144	0.0119207	down-regulated	D120 vs. D90
TCONS_00337003	6.64932	2.6032e-05	0.000221925	up-regulated	D120 vs. D90
TCONS_00337343	5.77699	0.00144086	0.00676621	up-regulated	D120 vs. D90
TCONS_00337347	5.45448	0.00642549	0.0225335	up-regulated	D120 vs. D90
TCONS_00337736	-2.79403	0.000128433	0.000862218	down-regulated	D120 vs. D90
TCONS_00338726	4.64712	0.012272	0.0370707	up-regulated	D120 vs. D90
TCONS_00338838	6.92662	5.31594e-06	5.51208e-05	up-regulated	D120 vs. D90
TCONS_00339459	-1.632	0.00245817	0.0104562	down-regulated	D120 vs. D90
TCONS_00339665	5.30197	0.00985627	0.0316006	up-regulated	D120 vs. D90
TCONS_00340185	4.05517	0.00167621	0.00764899	up-regulated	D120 vs. D90
TCONS_00340193	5.66053	1.80401e-07	2.76367e-06	up-regulated	D120 vs. D90
TCONS_00340441	-5.80914	0.00171979	0.00779547	down-regulated	D120 vs. D90
TCONS_00340782	6.4343	0.000136581	0.000906459	up-regulated	D120 vs. D90
TCONS_00340789	6.13581	0.000365091	0.00208368	up-regulated	D120 vs. D90
TCONS_00340794	5.72189	0.00217349	0.00949299	up-regulated	D120 vs. D90
TCONS_00340891	6.34588	0.000105833	0.000727269	up-regulated	D120 vs. D90
TCONS_00340911	5.09717	7.84651e-07	1.0183e-05	up-regulated	D120 vs. D90
TCONS_00341014	6.40161	8.28351e-05	0.000606772	up-regulated	D120 vs. D90
TCONS_00341668	5.33613	0.0102129	0.0325646	up-regulated	D120 vs. D90
TCONS_00342053	2.51195	0.00244867	0.0104267	up-regulated	D120 vs. D90
TCONS_00342708	5.65089	1.37141e-10	4.1092e-09	up-regulated	D120 vs. D90
TCONS_00342989	5.37299	0.00685207	0.0238041	up-regulated	D120 vs. D90
TCONS_00343446	5.99311	0.00105944	0.00520147	up-regulated	D120 vs. D90
TCONS_00343482	5.11055	0.00243078	0.0103901	up-regulated	D120 vs. D90
TCONS_00343508	2.86519	1.51302e-06	1.84598e-05	up-regulated	D120 vs. D90
TCONS_00343659	7.97274	4.45022e-09	9.69768e-08	up-regulated	D120 vs. D90
TCONS_00344138	5.62382	0.00328234	0.0133223	up-regulated	D120 vs. D90
TCONS_00344202	5.47135	0.00489396	0.0183189	up-regulated	D120 vs. D90
TCONS_00344215	2.34048	0.00554927	0.0200295	up-regulated	D120 vs. D90
TCONS_00344716	5.90238	0.000854968	0.00432795	up-regulated	D120 vs. D90
TCONS_00344722	5.77801	6.04947e-06	6.19387e-05	up-regulated	D120 vs. D90
TCONS_00345345	7.85605	1.08765e-08	2.21609e-07	up-regulated	D120 vs. D90
TCONS_00345408	4.22236	1.9345e-24	4.14899e-22	up-regulated	D120 vs. D90
TCONS_00345836	7.65926	5.23651e-08	9.19775e-07	up-regulated	D120 vs. D90
TCONS_00346142	3.86016	7.58821e-05	0.000565032	up-regulated	D120 vs. D90
TCONS_00346959	7.07125	2.84125e-06	3.13769e-05	up-regulated	D120 vs. D90
TCONS_00347016	6.60204	3.15539e-05	0.000260816	up-regulated	D120 vs. D90
TCONS_00347541	6.99543	2.8085e-06	3.10996e-05	up-regulated	D120 vs. D90
TCONS_00347559	7.25873	1.27301e-14	7.51815e-13	up-regulated	D120 vs. D90
TCONS_00347796	5.34173	5.80477e-12	2.38934e-10	up-regulated	D120 vs. D90
TCONS_00348124	1.69615	2.27906e-05	0.000199296	up-regulated	D120 vs. D90
TCONS_00348381	7.92201	8.58652e-09	1.79436e-07	up-regulated	D120 vs. D90
TCONS_00348673	3.97352	2.6597e-13	1.37193e-11	up-regulated	D120 vs. D90
TCONS_00348980	3.30547	0.00204178	0.00902416	up-regulated	D120 vs. D90
TCONS_00349385	-1.73229	8.16978e-06	8.04151e-05	down-regulated	D120 vs. D90
TCONS_00349640	9.53157	3.80633e-14	2.15428e-12	up-regulated	D120 vs. D90
TCONS_00349687	-1.46907	0.00028788	0.00170698	down-regulated	D120 vs. D90
TCONS_00349740	-1.25641	0.00462476	0.0175801	down-regulated	D120 vs. D90
TCONS_00350066	5.44508	0.00690595	0.0239351	up-regulated	D120 vs. D90
TCONS_00350190	8.08295	5.1165e-09	1.10316e-07	up-regulated	D120 vs. D90
TCONS_00350506	3.95519	0.00199405	0.0088709	up-regulated	D120 vs. D90
TCONS_00351612	4.68435	5.32855e-07	7.23794e-06	up-regulated	D120 vs. D90
TCONS_00351678	5.32559	3.58779e-08	6.46913e-07	up-regulated	D120 vs. D90
TCONS_00351940	6.05174	4.81307e-05	0.000375733	up-regulated	D120 vs. D90
TCONS_00351969	4.27942	0.00030054	0.00176216	up-regulated	D120 vs. D90
TCONS_00352088	-2.16793	6.60699e-07	8.74139e-06	down-regulated	D120 vs. D90
TCONS_00352234	3.52647	9.67614e-05	0.000677496	up-regulated	D120 vs. D90
TCONS_00352767	5.47619	0.00469067	0.0177809	up-regulated	D120 vs. D90
TCONS_00352787	5.11841	0.0138147	0.0409119	up-regulated	D120 vs. D90
TCONS_00353831	5.5562	0.0045927	0.0175073	up-regulated	D120 vs. D90
TCONS_00353877	2.82889	0.00163088	0.00749109	up-regulated	D120 vs. D90
TCONS_00354119	5.41066	0.000772146	0.00397646	up-regulated	D120 vs. D90
TCONS_00354467	5.48137	1.10838e-16	8.68583e-15	up-regulated	D120 vs. D90
TCONS_00355548	5.56681	0.00490452	0.0183189	up-regulated	D120 vs. D90
TCONS_00355588	3.79882	9.8608e-05	0.000686885	up-regulated	D120 vs. D90
TCONS_00356898	-1.23918	0.00678707	0.0236289	down-regulated	D120 vs. D90
TCONS_00359374	5.4921	0.00424216	0.0164636	up-regulated	D120 vs. D90
TCONS_00359488	-3.74961	0.00943994	0.030643	down-regulated	D120 vs. D90
TCONS_00359589	-1.82808	0.0149471	0.0434137	down-regulated	D120 vs. D90
TCONS_00359983	-1.13772	9.22227e-05	0.000651592	down-regulated	D120 vs. D90
TCONS_00360520	-2.30618	5.03552e-15	3.01761e-13	down-regulated	D120 vs. D90
TCONS_00360625	-7.12844	3.83305e-06	4.13219e-05	down-regulated	D120 vs. D90
TCONS_00361866	-1.53666	2.43668e-09	5.80671e-08	down-regulated	D120 vs. D90
TCONS_00362269	-5.27474	0.00187633	0.00843935	down-regulated	D120 vs. D90
TCONS_00362352	-2.61861	0.000421168	0.00235104	down-regulated	D120 vs. D90
TCONS_00362381	-1.62637	0.0167331	0.0474756	down-regulated	D120 vs. D90
TCONS_00363845	6.59334	8.92862e-05	0.000641086	up-regulated	D120 vs. D90
TCONS_00364641	4.54124	0.0150904	0.0436434	up-regulated	D120 vs. D90
TCONS_00364715	8.65238	3.04236e-11	1.03313e-09	up-regulated	D120 vs. D90
TCONS_00364838	8.78171	1.12761e-11	4.25466e-10	up-regulated	D120 vs. D90
TCONS_00365085	-2.76017	2.45695e-05	0.000211473	down-regulated	D120 vs. D90
TCONS_00366090	6.14792	2.31538e-21	3.77407e-19	up-regulated	D120 vs. D90
TCONS_00366091	10.1778	3.54479e-16	2.53421e-14	up-regulated	D120 vs. D90
TCONS_00367280	3.34971	0.00360079	0.0143574	up-regulated	D120 vs. D90
TCONS_00367605	3.1357	3.76229e-05	0.000304193	up-regulated	D120 vs. D90
TCONS_00367847	9.84175	3.56798e-15	2.2718e-13	up-regulated	D120 vs. D90
TCONS_00368505	5.72101	0.00658627	0.0230378	up-regulated	D120 vs. D90
TCONS_00368720	8.21429	1.80616e-09	4.46066e-08	up-regulated	D120 vs. D90
TCONS_00369376	9.52174	6.85451e-19	7.75893e-17	up-regulated	D120 vs. D90
TCONS_00369499	6.33561	0.000120213	0.000813994	up-regulated	D120 vs. D90
TCONS_00369547	5.32594	0.00765182	0.0258765	up-regulated	D120 vs. D90
TCONS_00370058	-2.83508	9.49158e-11	2.95253e-09	down-regulated	D120 vs. D90
TCONS_00370071	-2.46857	3.28802e-09	7.56987e-08	down-regulated	D120 vs. D90
TCONS_00370275	-4.75194	0.00233306	0.0100393	down-regulated	D120 vs. D90
TCONS_00370958	5.89592	0.000102037	0.000707142	up-regulated	D120 vs. D90
TCONS_00371240	6.61494	0.000132601	0.000881483	up-regulated	D120 vs. D90
TCONS_00372177	-1.77779	4.64589e-07	6.39594e-06	down-regulated	D120 vs. D90
TCONS_00372839	6.53593	4.054e-05	0.000325197	up-regulated	D120 vs. D90
TCONS_00372957	5.5983	4.49978e-12	1.89761e-10	up-regulated	D120 vs. D90
TCONS_00373134	5.88356	0.00102389	0.00505125	up-regulated	D120 vs. D90
TCONS_00373161	4.96109	0.00479058	0.0180589	up-regulated	D120 vs. D90
TCONS_00373333	4.07386	4.1518e-05	0.000331737	up-regulated	D120 vs. D90
TCONS_00373805	5.71919	0.00193175	0.00865042	up-regulated	D120 vs. D90
TCONS_00374124	5.68788	0.00254667	0.0107764	up-regulated	D120 vs. D90
TCONS_00374187	3.10205	0.00338234	0.0136466	up-regulated	D120 vs. D90
TCONS_00374189	8.05399	2.98468e-09	6.95004e-08	up-regulated	D120 vs. D90
TCONS_00374340	-3.72342	0.00512597	0.0189549	down-regulated	D120 vs. D90
TCONS_00375080	5.2259	0.0145987	0.0426144	up-regulated	D120 vs. D90
TCONS_00375369	4.81904	0.00621691	0.0219722	up-regulated	D120 vs. D90
TCONS_00375604	7.37373	1.31695e-29	3.5777e-27	up-regulated	D120 vs. D90
TCONS_00375858	5.6131	0.00342548	0.0137797	up-regulated	D120 vs. D90
TCONS_00376338	-6.06032	0.000799269	0.00408148	down-regulated	D120 vs. D90
TCONS_00376583	4.50231	4.0997e-05	0.000328218	up-regulated	D120 vs. D90
TCONS_00377043	-5.46511	0.0111121	0.0349126	down-regulated	D120 vs. D90
TCONS_00377280	2.25762	4.72048e-07	6.45502e-06	up-regulated	D120 vs. D90
TCONS_00377317	5.1081	0.0150686	0.0436215	up-regulated	D120 vs. D90
TCONS_00377455	3.89912	5.14528e-05	0.000398613	up-regulated	D120 vs. D90
TCONS_00377658	7.48136	2.42173e-07	3.56266e-06	up-regulated	D120 vs. D90
TCONS_00030377	-5.11615	7.07779e-06	0.0165196	down-regulated	D150 vs. D120
TCONS_00114387	-3.81888	1.08023e-05	0.0189094	down-regulated	D150 vs. D120
TCONS_00219146	-3.45005	5.7419e-06	0.0165196	down-regulated	D150 vs. D120
TCONS_00301744	7.32887	3.93039e-07	0.00275206	up-regulated	D150 vs. D120
TCONS_00007663	2.19679	1.04271e-05	0.0371102	up-regulated	D180 vs. D150
TCONS_00376277	-3.93521	7.74587e-08	0.000551351	down-regulated	D180 vs. D150
