# Supplementary material for: RNA-Seq Implies Divergent Regulation Patterns of LincRNA on Spermatogenesis and Testis Growth in Goats
Source: Animals (Basel). 2021 Feb 26;11(3):625. doi: 10.3390/ani11030625 (PMC7996862; doi:10.3390/ani11030625)
Supplement: Supplementary file 1 [file animals-11-00625-s001.zip › Table S5.xlsx]

## Sheet: Table S5
LincRNA	Module	Module color
ENSCHIT00000000777	LM1	Blue
ENSCHIT00000001085	LM1	Blue
ENSCHIT00000001194	LM1	Blue
ENSCHIT00000001289	LM1	Blue
ENSCHIT00000001436	LM1	Blue
ENSCHIT00000001510	LM1	Blue
ENSCHIT00000001659	LM1	Blue
ENSCHIT00000001785	LM1	Blue
ENSCHIT00000001914	LM1	Blue
ENSCHIT00000001951	LM1	Blue
ENSCHIT00000001974	LM1	Blue
ENSCHIT00000002069	LM1	Blue
ENSCHIT00000002233	LM1	Blue
ENSCHIT00000002318	LM1	Blue
ENSCHIT00000002352	LM1	Blue
ENSCHIT00000002365	LM1	Blue
ENSCHIT00000002367	LM1	Blue
ENSCHIT00000002399	LM1	Blue
ENSCHIT00000002459	LM1	Blue
ENSCHIT00000002464	LM1	Blue
ENSCHIT00000002604	LM1	Blue
ENSCHIT00000002637	LM1	Blue
ENSCHIT00000002721	LM1	Blue
ENSCHIT00000003024	LM1	Blue
ENSCHIT00000003096	LM1	Blue
ENSCHIT00000003365	LM1	Blue
ENSCHIT00000003381	LM1	Blue
ENSCHIT00000003386	LM1	Blue
ENSCHIT00000003404	LM1	Blue
ENSCHIT00000003825	LM1	Blue
ENSCHIT00000004799	LM1	Blue
ENSCHIT00000004882	LM1	Blue
ENSCHIT00000004917	LM1	Blue
ENSCHIT00000004994	LM1	Blue
ENSCHIT00000005075	LM1	Blue
ENSCHIT00000005076	LM1	Blue
ENSCHIT00000005329	LM1	Blue
ENSCHIT00000005332	LM1	Blue
ENSCHIT00000005364	LM1	Blue
ENSCHIT00000005380	LM1	Blue
ENSCHIT00000005446	LM1	Blue
ENSCHIT00000005475	LM1	Blue
ENSCHIT00000005526	LM1	Blue
ENSCHIT00000005622	LM1	Blue
ENSCHIT00000005689	LM1	Blue
ENSCHIT00000005742	LM1	Blue
ENSCHIT00000006028	LM1	Blue
ENSCHIT00000006492	LM1	Blue
ENSCHIT00000006546	LM1	Blue
ENSCHIT00000006561	LM1	Blue
ENSCHIT00000006600	LM1	Blue
ENSCHIT00000006727	LM1	Blue
ENSCHIT00000006819	LM1	Blue
ENSCHIT00000006940	LM1	Blue
ENSCHIT00000006965	LM1	Blue
ENSCHIT00000006969	LM1	Blue
ENSCHIT00000006990	LM1	Blue
ENSCHIT00000006998	LM1	Blue
ENSCHIT00000007082	LM1	Blue
ENSCHIT00000007117	LM1	Blue
ENSCHIT00000007374	LM1	Blue
ENSCHIT00000007414	LM1	Blue
ENSCHIT00000007604	LM1	Blue
ENSCHIT00000007891	LM1	Blue
ENSCHIT00000007897	LM1	Blue
ENSCHIT00000007906	LM1	Blue
ENSCHIT00000008069	LM1	Blue
ENSCHIT00000008094	LM1	Blue
ENSCHIT00000008149	LM1	Blue
ENSCHIT00000009140	LM1	Blue
ENSCHIT00000009178	LM1	Blue
ENSCHIT00000009194	LM1	Blue
ENSCHIT00000009425	LM1	Blue
ENSCHIT00000009489	LM1	Blue
ENSCHIT00000009497	LM1	Blue
ENSCHIT00000009499	LM1	Blue
ENSCHIT00000009538	LM1	Blue
ENSCHIT00000009640	LM1	Blue
ENSCHIT00000009645	LM1	Blue
ENSCHIT00000009737	LM1	Blue
ENSCHIT00000009813	LM1	Blue
ENSCHIT00000009854	LM1	Blue
ENSCHIT00000009881	LM1	Blue
ENSCHIT00000010011	LM1	Blue
ENSCHIT00000010215	LM1	Blue
ENSCHIT00000010290	LM1	Blue
ENSCHIT00000010547	LM1	Blue
ENSCHIT00000010581	LM1	Blue
ENSCHIT00000010753	LM1	Blue
ENSCHIT00000010792	LM1	Blue
ENSCHIT00000010825	LM1	Blue
ENSCHIT00000010847	LM1	Blue
ENSCHIT00000010986	LM1	Blue
ENSCHIT00000011016	LM1	Blue
ENSCHIT00000011042	LM1	Blue
ENSCHIT00000011188	LM1	Blue
ENSCHIT00000011193	LM1	Blue
TCONS_00002961	LM1	Blue
TCONS_00003098	LM1	Blue
TCONS_00012317	LM1	Blue
TCONS_00012489	LM1	Blue
TCONS_00014921	LM1	Blue
TCONS_00014930	LM1	Blue
TCONS_00017534	LM1	Blue
TCONS_00020942	LM1	Blue
TCONS_00034550	LM1	Blue
TCONS_00067031	LM1	Blue
TCONS_00074323	LM1	Blue
TCONS_00077254	LM1	Blue
TCONS_00078498	LM1	Blue
TCONS_00090518	LM1	Blue
TCONS_00094750	LM1	Blue
TCONS_00096975	LM1	Blue
TCONS_00103503	LM1	Blue
TCONS_00104796	LM1	Blue
TCONS_00105630	LM1	Blue
TCONS_00114291	LM1	Blue
TCONS_00114339	LM1	Blue
TCONS_00133709	LM1	Blue
TCONS_00138249	LM1	Blue
TCONS_00146064	LM1	Blue
TCONS_00147634	LM1	Blue
TCONS_00174040	LM1	Blue
TCONS_00183792	LM1	Blue
TCONS_00183848	LM1	Blue
TCONS_00185389	LM1	Blue
TCONS_00190667	LM1	Blue
TCONS_00202267	LM1	Blue
TCONS_00203514	LM1	Blue
TCONS_00203518	LM1	Blue
TCONS_00203534	LM1	Blue
TCONS_00205052	LM1	Blue
TCONS_00212595	LM1	Blue
TCONS_00223181	LM1	Blue
TCONS_00224265	LM1	Blue
TCONS_00224497	LM1	Blue
TCONS_00230083	LM1	Blue
TCONS_00235055	LM1	Blue
TCONS_00243286	LM1	Blue
TCONS_00250762	LM1	Blue
TCONS_00253516	LM1	Blue
TCONS_00264754	LM1	Blue
TCONS_00270464	LM1	Blue
TCONS_00277455	LM1	Blue
TCONS_00279763	LM1	Blue
TCONS_00280515	LM1	Blue
TCONS_00281744	LM1	Blue
TCONS_00283906	LM1	Blue
TCONS_00287270	LM1	Blue
TCONS_00296705	LM1	Blue
TCONS_00301370	LM1	Blue
TCONS_00309905	LM1	Blue
TCONS_00311534	LM1	Blue
TCONS_00312753	LM1	Blue
TCONS_00319522	LM1	Blue
TCONS_00319540	LM1	Blue
TCONS_00319543	LM1	Blue
TCONS_00319548	LM1	Blue
TCONS_00322747	LM1	Blue
TCONS_00323601	LM1	Blue
TCONS_00324902	LM1	Blue
TCONS_00331522	LM1	Blue
TCONS_00342989	LM1	Blue
TCONS_00352088	LM1	Blue
TCONS_00359983	LM1	Blue
TCONS_00360271	LM1	Blue
TCONS_00366553	LM1	Blue
TCONS_00000241	LM2	Turquoise
TCONS_00000242	LM2	Turquoise
TCONS_00000339	LM2	Turquoise
TCONS_00000772	LM2	Turquoise
TCONS_00000807	LM2	Turquoise
TCONS_00001441	LM2	Turquoise
TCONS_00001937	LM2	Turquoise
TCONS_00002489	LM2	Turquoise
TCONS_00002643	LM2	Turquoise
TCONS_00002645	LM2	Turquoise
TCONS_00003187	LM2	Turquoise
TCONS_00003303	LM2	Turquoise
TCONS_00003455	LM2	Turquoise
TCONS_00003665	LM2	Turquoise
TCONS_00004090	LM2	Turquoise
TCONS_00004212	LM2	Turquoise
TCONS_00004589	LM2	Turquoise
TCONS_00005605	LM2	Turquoise
TCONS_00006206	LM2	Turquoise
TCONS_00006625	LM2	Turquoise
TCONS_00007405	LM2	Turquoise
TCONS_00007726	LM2	Turquoise
TCONS_00007824	LM2	Turquoise
TCONS_00007926	LM2	Turquoise
TCONS_00008320	LM2	Turquoise
TCONS_00008767	LM2	Turquoise
TCONS_00009219	LM2	Turquoise
TCONS_00009282	LM2	Turquoise
TCONS_00009353	LM2	Turquoise
TCONS_00009892	LM2	Turquoise
TCONS_00010532	LM2	Turquoise
TCONS_00010677	LM2	Turquoise
TCONS_00011482	LM2	Turquoise
TCONS_00011945	LM2	Turquoise
TCONS_00013216	LM2	Turquoise
TCONS_00013364	LM2	Turquoise
TCONS_00013456	LM2	Turquoise
TCONS_00015084	LM2	Turquoise
TCONS_00015272	LM2	Turquoise
TCONS_00015884	LM2	Turquoise
TCONS_00016030	LM2	Turquoise
TCONS_00016126	LM2	Turquoise
TCONS_00016221	LM2	Turquoise
TCONS_00016877	LM2	Turquoise
TCONS_00016891	LM2	Turquoise
TCONS_00017055	LM2	Turquoise
TCONS_00017655	LM2	Turquoise
TCONS_00018408	LM2	Turquoise
TCONS_00018952	LM2	Turquoise
TCONS_00019255	LM2	Turquoise
TCONS_00019481	LM2	Turquoise
TCONS_00020107	LM2	Turquoise
TCONS_00020136	LM2	Turquoise
TCONS_00020152	LM2	Turquoise
TCONS_00020369	LM2	Turquoise
TCONS_00020709	LM2	Turquoise
TCONS_00021049	LM2	Turquoise
TCONS_00021439	LM2	Turquoise
TCONS_00024879	LM2	Turquoise
TCONS_00025097	LM2	Turquoise
TCONS_00025391	LM2	Turquoise
TCONS_00025521	LM2	Turquoise
TCONS_00026155	LM2	Turquoise
TCONS_00026807	LM2	Turquoise
TCONS_00027413	LM2	Turquoise
TCONS_00027418	LM2	Turquoise
TCONS_00027511	LM2	Turquoise
TCONS_00027796	LM2	Turquoise
TCONS_00028383	LM2	Turquoise
TCONS_00028568	LM2	Turquoise
TCONS_00029100	LM2	Turquoise
TCONS_00029160	LM2	Turquoise
TCONS_00030645	LM2	Turquoise
TCONS_00031526	LM2	Turquoise
TCONS_00031947	LM2	Turquoise
TCONS_00033684	LM2	Turquoise
TCONS_00034054	LM2	Turquoise
TCONS_00034065	LM2	Turquoise
TCONS_00034391	LM2	Turquoise
TCONS_00034837	LM2	Turquoise
TCONS_00035696	LM2	Turquoise
TCONS_00035803	LM2	Turquoise
TCONS_00035925	LM2	Turquoise
TCONS_00036415	LM2	Turquoise
TCONS_00037562	LM2	Turquoise
TCONS_00038126	LM2	Turquoise
TCONS_00038244	LM2	Turquoise
TCONS_00038257	LM2	Turquoise
TCONS_00038342	LM2	Turquoise
TCONS_00038872	LM2	Turquoise
TCONS_00040374	LM2	Turquoise
TCONS_00040557	LM2	Turquoise
TCONS_00040742	LM2	Turquoise
TCONS_00040798	LM2	Turquoise
TCONS_00043010	LM2	Turquoise
TCONS_00043808	LM2	Turquoise
TCONS_00043930	LM2	Turquoise
TCONS_00043970	LM2	Turquoise
TCONS_00044394	LM2	Turquoise
TCONS_00044395	LM2	Turquoise
TCONS_00044459	LM2	Turquoise
TCONS_00045396	LM2	Turquoise
TCONS_00045448	LM2	Turquoise
TCONS_00045517	LM2	Turquoise
TCONS_00046359	LM2	Turquoise
TCONS_00046856	LM2	Turquoise
TCONS_00046977	LM2	Turquoise
TCONS_00047341	LM2	Turquoise
TCONS_00047418	LM2	Turquoise
TCONS_00048017	LM2	Turquoise
TCONS_00048173	LM2	Turquoise
TCONS_00048554	LM2	Turquoise
TCONS_00048637	LM2	Turquoise
TCONS_00048660	LM2	Turquoise
TCONS_00048965	LM2	Turquoise
TCONS_00049327	LM2	Turquoise
TCONS_00049991	LM2	Turquoise
TCONS_00051809	LM2	Turquoise
TCONS_00052065	LM2	Turquoise
TCONS_00052974	LM2	Turquoise
TCONS_00053364	LM2	Turquoise
TCONS_00053488	LM2	Turquoise
TCONS_00053737	LM2	Turquoise
TCONS_00053864	LM2	Turquoise
TCONS_00054715	LM2	Turquoise
TCONS_00054816	LM2	Turquoise
TCONS_00054860	LM2	Turquoise
TCONS_00054944	LM2	Turquoise
TCONS_00054962	LM2	Turquoise
TCONS_00055509	LM2	Turquoise
TCONS_00055708	LM2	Turquoise
TCONS_00055709	LM2	Turquoise
TCONS_00056340	LM2	Turquoise
TCONS_00057038	LM2	Turquoise
TCONS_00057211	LM2	Turquoise
TCONS_00057759	LM2	Turquoise
TCONS_00058230	LM2	Turquoise
TCONS_00059363	LM2	Turquoise
TCONS_00059710	LM2	Turquoise
TCONS_00060365	LM2	Turquoise
TCONS_00061156	LM2	Turquoise
TCONS_00061419	LM2	Turquoise
TCONS_00061722	LM2	Turquoise
TCONS_00062209	LM2	Turquoise
TCONS_00062354	LM2	Turquoise
TCONS_00062594	LM2	Turquoise
TCONS_00062680	LM2	Turquoise
TCONS_00062770	LM2	Turquoise
TCONS_00063136	LM2	Turquoise
TCONS_00063138	LM2	Turquoise
TCONS_00063235	LM2	Turquoise
TCONS_00063333	LM2	Turquoise
TCONS_00063352	LM2	Turquoise
TCONS_00064276	LM2	Turquoise
TCONS_00064364	LM2	Turquoise
TCONS_00065006	LM2	Turquoise
TCONS_00065404	LM2	Turquoise
TCONS_00065669	LM2	Turquoise
TCONS_00066099	LM2	Turquoise
TCONS_00066105	LM2	Turquoise
TCONS_00066234	LM2	Turquoise
TCONS_00066370	LM2	Turquoise
TCONS_00066434	LM2	Turquoise
TCONS_00066504	LM2	Turquoise
TCONS_00066659	LM2	Turquoise
TCONS_00066790	LM2	Turquoise
TCONS_00066808	LM2	Turquoise
TCONS_00067325	LM2	Turquoise
TCONS_00067760	LM2	Turquoise
TCONS_00068313	LM2	Turquoise
TCONS_00068455	LM2	Turquoise
TCONS_00068692	LM2	Turquoise
TCONS_00068785	LM2	Turquoise
TCONS_00068798	LM2	Turquoise
TCONS_00068896	LM2	Turquoise
TCONS_00068975	LM2	Turquoise
TCONS_00068976	LM2	Turquoise
TCONS_00069047	LM2	Turquoise
TCONS_00069244	LM2	Turquoise
TCONS_00069246	LM2	Turquoise
TCONS_00069338	LM2	Turquoise
TCONS_00069717	LM2	Turquoise
TCONS_00070162	LM2	Turquoise
TCONS_00070344	LM2	Turquoise
TCONS_00071337	LM2	Turquoise
TCONS_00071619	LM2	Turquoise
TCONS_00072073	LM2	Turquoise
TCONS_00072412	LM2	Turquoise
TCONS_00072561	LM2	Turquoise
TCONS_00072602	LM2	Turquoise
TCONS_00072606	LM2	Turquoise
TCONS_00072761	LM2	Turquoise
TCONS_00073025	LM2	Turquoise
TCONS_00073036	LM2	Turquoise
TCONS_00073763	LM2	Turquoise
TCONS_00074272	LM2	Turquoise
TCONS_00074286	LM2	Turquoise
TCONS_00074647	LM2	Turquoise
TCONS_00074648	LM2	Turquoise
TCONS_00075011	LM2	Turquoise
TCONS_00075749	LM2	Turquoise
TCONS_00076127	LM2	Turquoise
TCONS_00076764	LM2	Turquoise
TCONS_00077065	LM2	Turquoise
TCONS_00077102	LM2	Turquoise
TCONS_00077203	LM2	Turquoise
TCONS_00077344	LM2	Turquoise
TCONS_00077346	LM2	Turquoise
TCONS_00077355	LM2	Turquoise
TCONS_00077514	LM2	Turquoise
TCONS_00077616	LM2	Turquoise
TCONS_00077644	LM2	Turquoise
TCONS_00077671	LM2	Turquoise
TCONS_00077726	LM2	Turquoise
TCONS_00079358	LM2	Turquoise
TCONS_00079882	LM2	Turquoise
TCONS_00080147	LM2	Turquoise
TCONS_00080149	LM2	Turquoise
TCONS_00080677	LM2	Turquoise
TCONS_00081488	LM2	Turquoise
TCONS_00082145	LM2	Turquoise
TCONS_00082866	LM2	Turquoise
TCONS_00082888	LM2	Turquoise
TCONS_00082917	LM2	Turquoise
TCONS_00083129	LM2	Turquoise
TCONS_00083130	LM2	Turquoise
TCONS_00083248	LM2	Turquoise
TCONS_00083879	LM2	Turquoise
TCONS_00084231	LM2	Turquoise
TCONS_00084247	LM2	Turquoise
TCONS_00084369	LM2	Turquoise
TCONS_00085074	LM2	Turquoise
TCONS_00085082	LM2	Turquoise
TCONS_00086117	LM2	Turquoise
TCONS_00086159	LM2	Turquoise
TCONS_00086284	LM2	Turquoise
TCONS_00087034	LM2	Turquoise
TCONS_00088438	LM2	Turquoise
TCONS_00088689	LM2	Turquoise
TCONS_00088896	LM2	Turquoise
TCONS_00089727	LM2	Turquoise
TCONS_00089744	LM2	Turquoise
TCONS_00090440	LM2	Turquoise
TCONS_00090453	LM2	Turquoise
TCONS_00090764	LM2	Turquoise
TCONS_00091181	LM2	Turquoise
TCONS_00091232	LM2	Turquoise
TCONS_00091783	LM2	Turquoise
TCONS_00094090	LM2	Turquoise
TCONS_00094227	LM2	Turquoise
TCONS_00094242	LM2	Turquoise
TCONS_00094245	LM2	Turquoise
TCONS_00094246	LM2	Turquoise
TCONS_00094678	LM2	Turquoise
TCONS_00095920	LM2	Turquoise
TCONS_00096113	LM2	Turquoise
TCONS_00096829	LM2	Turquoise
TCONS_00098373	LM2	Turquoise
TCONS_00099289	LM2	Turquoise
TCONS_00099294	LM2	Turquoise
TCONS_00099763	LM2	Turquoise
TCONS_00100199	LM2	Turquoise
TCONS_00100322	LM2	Turquoise
TCONS_00100393	LM2	Turquoise
TCONS_00100409	LM2	Turquoise
TCONS_00101761	LM2	Turquoise
TCONS_00101799	LM2	Turquoise
TCONS_00101920	LM2	Turquoise
TCONS_00103707	LM2	Turquoise
TCONS_00103784	LM2	Turquoise
TCONS_00105443	LM2	Turquoise
TCONS_00105449	LM2	Turquoise
TCONS_00106374	LM2	Turquoise
TCONS_00106822	LM2	Turquoise
TCONS_00107244	LM2	Turquoise
TCONS_00107250	LM2	Turquoise
TCONS_00107506	LM2	Turquoise
TCONS_00107867	LM2	Turquoise
TCONS_00107905	LM2	Turquoise
TCONS_00109846	LM2	Turquoise
TCONS_00110086	LM2	Turquoise
TCONS_00110115	LM2	Turquoise
TCONS_00110410	LM2	Turquoise
TCONS_00111302	LM2	Turquoise
TCONS_00111873	LM2	Turquoise
TCONS_00112346	LM2	Turquoise
TCONS_00112486	LM2	Turquoise
TCONS_00112738	LM2	Turquoise
TCONS_00113014	LM2	Turquoise
TCONS_00113034	LM2	Turquoise
TCONS_00113325	LM2	Turquoise
TCONS_00113397	LM2	Turquoise
TCONS_00113401	LM2	Turquoise
TCONS_00114483	LM2	Turquoise
TCONS_00114735	LM2	Turquoise
TCONS_00116120	LM2	Turquoise
TCONS_00116392	LM2	Turquoise
TCONS_00116705	LM2	Turquoise
TCONS_00116975	LM2	Turquoise
TCONS_00117078	LM2	Turquoise
TCONS_00119038	LM2	Turquoise
TCONS_00119382	LM2	Turquoise
TCONS_00119931	LM2	Turquoise
TCONS_00120660	LM2	Turquoise
TCONS_00121056	LM2	Turquoise
TCONS_00121470	LM2	Turquoise
TCONS_00123167	LM2	Turquoise
TCONS_00123171	LM2	Turquoise
TCONS_00124156	LM2	Turquoise
TCONS_00124449	LM2	Turquoise
TCONS_00125349	LM2	Turquoise
TCONS_00125933	LM2	Turquoise
TCONS_00125959	LM2	Turquoise
TCONS_00126039	LM2	Turquoise
TCONS_00126454	LM2	Turquoise
TCONS_00126511	LM2	Turquoise
TCONS_00126783	LM2	Turquoise
TCONS_00127102	LM2	Turquoise
TCONS_00127682	LM2	Turquoise
TCONS_00128135	LM2	Turquoise
TCONS_00129673	LM2	Turquoise
TCONS_00129674	LM2	Turquoise
TCONS_00129677	LM2	Turquoise
TCONS_00130090	LM2	Turquoise
TCONS_00130543	LM2	Turquoise
TCONS_00130545	LM2	Turquoise
TCONS_00130739	LM2	Turquoise
TCONS_00132050	LM2	Turquoise
TCONS_00132217	LM2	Turquoise
TCONS_00132616	LM2	Turquoise
TCONS_00134852	LM2	Turquoise
TCONS_00134938	LM2	Turquoise
TCONS_00135017	LM2	Turquoise
TCONS_00135063	LM2	Turquoise
TCONS_00135847	LM2	Turquoise
TCONS_00136291	LM2	Turquoise
TCONS_00137589	LM2	Turquoise
TCONS_00137835	LM2	Turquoise
TCONS_00137899	LM2	Turquoise
TCONS_00138205	LM2	Turquoise
TCONS_00138251	LM2	Turquoise
TCONS_00138372	LM2	Turquoise
TCONS_00139628	LM2	Turquoise
TCONS_00139636	LM2	Turquoise
TCONS_00139752	LM2	Turquoise
TCONS_00141829	LM2	Turquoise
TCONS_00144063	LM2	Turquoise
TCONS_00145860	LM2	Turquoise
TCONS_00145862	LM2	Turquoise
TCONS_00146729	LM2	Turquoise
TCONS_00147025	LM2	Turquoise
TCONS_00147608	LM2	Turquoise
TCONS_00147823	LM2	Turquoise
TCONS_00147980	LM2	Turquoise
TCONS_00149106	LM2	Turquoise
TCONS_00149127	LM2	Turquoise
TCONS_00150312	LM2	Turquoise
TCONS_00150560	LM2	Turquoise
TCONS_00150856	LM2	Turquoise
TCONS_00151166	LM2	Turquoise
TCONS_00152521	LM2	Turquoise
TCONS_00152523	LM2	Turquoise
TCONS_00153223	LM2	Turquoise
TCONS_00154403	LM2	Turquoise
TCONS_00154447	LM2	Turquoise
TCONS_00155038	LM2	Turquoise
TCONS_00155694	LM2	Turquoise
TCONS_00155892	LM2	Turquoise
TCONS_00156546	LM2	Turquoise
TCONS_00156996	LM2	Turquoise
TCONS_00157149	LM2	Turquoise
TCONS_00157622	LM2	Turquoise
TCONS_00157937	LM2	Turquoise
TCONS_00158463	LM2	Turquoise
TCONS_00158887	LM2	Turquoise
TCONS_00159518	LM2	Turquoise
TCONS_00159926	LM2	Turquoise
TCONS_00160076	LM2	Turquoise
TCONS_00160357	LM2	Turquoise
TCONS_00160365	LM2	Turquoise
TCONS_00161398	LM2	Turquoise
TCONS_00162025	LM2	Turquoise
TCONS_00162505	LM2	Turquoise
TCONS_00163010	LM2	Turquoise
TCONS_00163905	LM2	Turquoise
TCONS_00164311	LM2	Turquoise
TCONS_00165145	LM2	Turquoise
TCONS_00165700	LM2	Turquoise
TCONS_00165921	LM2	Turquoise
TCONS_00165981	LM2	Turquoise
TCONS_00166391	LM2	Turquoise
TCONS_00167024	LM2	Turquoise
TCONS_00167583	LM2	Turquoise
TCONS_00168419	LM2	Turquoise
TCONS_00168436	LM2	Turquoise
TCONS_00168995	LM2	Turquoise
TCONS_00169321	LM2	Turquoise
TCONS_00169634	LM2	Turquoise
TCONS_00170086	LM2	Turquoise
TCONS_00170278	LM2	Turquoise
TCONS_00170316	LM2	Turquoise
TCONS_00170318	LM2	Turquoise
TCONS_00170324	LM2	Turquoise
TCONS_00170328	LM2	Turquoise
TCONS_00170430	LM2	Turquoise
TCONS_00171002	LM2	Turquoise
TCONS_00172147	LM2	Turquoise
TCONS_00172259	LM2	Turquoise
TCONS_00173905	LM2	Turquoise
TCONS_00174059	LM2	Turquoise
TCONS_00174921	LM2	Turquoise
TCONS_00175233	LM2	Turquoise
TCONS_00176423	LM2	Turquoise
TCONS_00176626	LM2	Turquoise
TCONS_00177201	LM2	Turquoise
TCONS_00177246	LM2	Turquoise
TCONS_00177996	LM2	Turquoise
TCONS_00178037	LM2	Turquoise
TCONS_00178135	LM2	Turquoise
TCONS_00178466	LM2	Turquoise
TCONS_00178728	LM2	Turquoise
TCONS_00178908	LM2	Turquoise
TCONS_00178981	LM2	Turquoise
TCONS_00179043	LM2	Turquoise
TCONS_00179047	LM2	Turquoise
TCONS_00179457	LM2	Turquoise
TCONS_00179458	LM2	Turquoise
TCONS_00179619	LM2	Turquoise
TCONS_00179635	LM2	Turquoise
TCONS_00179711	LM2	Turquoise
TCONS_00180115	LM2	Turquoise
TCONS_00180211	LM2	Turquoise
TCONS_00180247	LM2	Turquoise
TCONS_00181947	LM2	Turquoise
TCONS_00182161	LM2	Turquoise
TCONS_00182838	LM2	Turquoise
TCONS_00183005	LM2	Turquoise
TCONS_00183398	LM2	Turquoise
TCONS_00183738	LM2	Turquoise
TCONS_00183875	LM2	Turquoise
TCONS_00183887	LM2	Turquoise
TCONS_00183902	LM2	Turquoise
TCONS_00183905	LM2	Turquoise
TCONS_00183924	LM2	Turquoise
TCONS_00184029	LM2	Turquoise
TCONS_00186252	LM2	Turquoise
TCONS_00186747	LM2	Turquoise
TCONS_00187495	LM2	Turquoise
TCONS_00187538	LM2	Turquoise
TCONS_00187696	LM2	Turquoise
TCONS_00187719	LM2	Turquoise
TCONS_00187946	LM2	Turquoise
TCONS_00188318	LM2	Turquoise
TCONS_00188908	LM2	Turquoise
TCONS_00189836	LM2	Turquoise
TCONS_00189938	LM2	Turquoise
TCONS_00190583	LM2	Turquoise
TCONS_00191985	LM2	Turquoise
TCONS_00192179	LM2	Turquoise
TCONS_00192565	LM2	Turquoise
TCONS_00192900	LM2	Turquoise
TCONS_00193978	LM2	Turquoise
TCONS_00194189	LM2	Turquoise
TCONS_00194551	LM2	Turquoise
TCONS_00194589	LM2	Turquoise
TCONS_00194853	LM2	Turquoise
TCONS_00196008	LM2	Turquoise
TCONS_00196079	LM2	Turquoise
TCONS_00196181	LM2	Turquoise
TCONS_00196696	LM2	Turquoise
TCONS_00196937	LM2	Turquoise
TCONS_00198298	LM2	Turquoise
TCONS_00198494	LM2	Turquoise
TCONS_00198512	LM2	Turquoise
TCONS_00199648	LM2	Turquoise
TCONS_00199926	LM2	Turquoise
TCONS_00199981	LM2	Turquoise
TCONS_00200156	LM2	Turquoise
TCONS_00200441	LM2	Turquoise
TCONS_00200641	LM2	Turquoise
TCONS_00200932	LM2	Turquoise
TCONS_00200945	LM2	Turquoise
TCONS_00201162	LM2	Turquoise
TCONS_00201385	LM2	Turquoise
TCONS_00201433	LM2	Turquoise
TCONS_00202458	LM2	Turquoise
TCONS_00203456	LM2	Turquoise
TCONS_00203465	LM2	Turquoise
TCONS_00203488	LM2	Turquoise
TCONS_00203519	LM2	Turquoise
TCONS_00203630	LM2	Turquoise
TCONS_00203848	LM2	Turquoise
TCONS_00203971	LM2	Turquoise
TCONS_00204099	LM2	Turquoise
TCONS_00204226	LM2	Turquoise
TCONS_00204813	LM2	Turquoise
TCONS_00205262	LM2	Turquoise
TCONS_00205389	LM2	Turquoise
TCONS_00206649	LM2	Turquoise
TCONS_00207484	LM2	Turquoise
TCONS_00207501	LM2	Turquoise
TCONS_00207614	LM2	Turquoise
TCONS_00207615	LM2	Turquoise
TCONS_00209090	LM2	Turquoise
TCONS_00211130	LM2	Turquoise
TCONS_00211311	LM2	Turquoise
TCONS_00211454	LM2	Turquoise
TCONS_00211494	LM2	Turquoise
TCONS_00211778	LM2	Turquoise
TCONS_00211912	LM2	Turquoise
TCONS_00213667	LM2	Turquoise
TCONS_00213673	LM2	Turquoise
TCONS_00213952	LM2	Turquoise
TCONS_00215180	LM2	Turquoise
TCONS_00215296	LM2	Turquoise
TCONS_00215299	LM2	Turquoise
TCONS_00215926	LM2	Turquoise
TCONS_00215932	LM2	Turquoise
TCONS_00215962	LM2	Turquoise
TCONS_00216743	LM2	Turquoise
TCONS_00216770	LM2	Turquoise
TCONS_00217057	LM2	Turquoise
TCONS_00217187	LM2	Turquoise
TCONS_00217831	LM2	Turquoise
TCONS_00219146	LM2	Turquoise
TCONS_00221755	LM2	Turquoise
TCONS_00222308	LM2	Turquoise
TCONS_00223806	LM2	Turquoise
TCONS_00224245	LM2	Turquoise
TCONS_00224442	LM2	Turquoise
TCONS_00224515	LM2	Turquoise
TCONS_00224719	LM2	Turquoise
TCONS_00224791	LM2	Turquoise
TCONS_00225155	LM2	Turquoise
TCONS_00225513	LM2	Turquoise
TCONS_00225939	LM2	Turquoise
TCONS_00225940	LM2	Turquoise
TCONS_00225956	LM2	Turquoise
TCONS_00226282	LM2	Turquoise
TCONS_00226335	LM2	Turquoise
TCONS_00226994	LM2	Turquoise
TCONS_00227590	LM2	Turquoise
TCONS_00227701	LM2	Turquoise
TCONS_00227932	LM2	Turquoise
TCONS_00227998	LM2	Turquoise
TCONS_00228639	LM2	Turquoise
TCONS_00228685	LM2	Turquoise
TCONS_00228700	LM2	Turquoise
TCONS_00228701	LM2	Turquoise
TCONS_00228711	LM2	Turquoise
TCONS_00229587	LM2	Turquoise
TCONS_00229841	LM2	Turquoise
TCONS_00229861	LM2	Turquoise
TCONS_00229968	LM2	Turquoise
TCONS_00230242	LM2	Turquoise
TCONS_00230406	LM2	Turquoise
TCONS_00230480	LM2	Turquoise
TCONS_00230663	LM2	Turquoise
TCONS_00231234	LM2	Turquoise
TCONS_00231475	LM2	Turquoise
TCONS_00231914	LM2	Turquoise
TCONS_00232835	LM2	Turquoise
TCONS_00232867	LM2	Turquoise
TCONS_00233346	LM2	Turquoise
TCONS_00233817	LM2	Turquoise
TCONS_00234186	LM2	Turquoise
TCONS_00235219	LM2	Turquoise
TCONS_00236036	LM2	Turquoise
TCONS_00236038	LM2	Turquoise
TCONS_00237848	LM2	Turquoise
TCONS_00239373	LM2	Turquoise
TCONS_00239428	LM2	Turquoise
TCONS_00239696	LM2	Turquoise
TCONS_00240430	LM2	Turquoise
TCONS_00240456	LM2	Turquoise
TCONS_00241505	LM2	Turquoise
TCONS_00242196	LM2	Turquoise
TCONS_00242490	LM2	Turquoise
TCONS_00244388	LM2	Turquoise
TCONS_00245055	LM2	Turquoise
TCONS_00245178	LM2	Turquoise
TCONS_00247259	LM2	Turquoise
TCONS_00247274	LM2	Turquoise
TCONS_00247314	LM2	Turquoise
TCONS_00247863	LM2	Turquoise
TCONS_00248056	LM2	Turquoise
TCONS_00248129	LM2	Turquoise
TCONS_00248535	LM2	Turquoise
TCONS_00248696	LM2	Turquoise
TCONS_00249416	LM2	Turquoise
TCONS_00249417	LM2	Turquoise
TCONS_00249420	LM2	Turquoise
TCONS_00250807	LM2	Turquoise
TCONS_00251176	LM2	Turquoise
TCONS_00251258	LM2	Turquoise
TCONS_00253123	LM2	Turquoise
TCONS_00253155	LM2	Turquoise
TCONS_00253223	LM2	Turquoise
TCONS_00253506	LM2	Turquoise
TCONS_00254063	LM2	Turquoise
TCONS_00254431	LM2	Turquoise
TCONS_00254832	LM2	Turquoise
TCONS_00255569	LM2	Turquoise
TCONS_00255866	LM2	Turquoise
TCONS_00255990	LM2	Turquoise
TCONS_00256017	LM2	Turquoise
TCONS_00256425	LM2	Turquoise
TCONS_00257116	LM2	Turquoise
TCONS_00257122	LM2	Turquoise
TCONS_00257774	LM2	Turquoise
TCONS_00258314	LM2	Turquoise
TCONS_00258380	LM2	Turquoise
TCONS_00259456	LM2	Turquoise
TCONS_00263467	LM2	Turquoise
TCONS_00263781	LM2	Turquoise
TCONS_00264268	LM2	Turquoise
TCONS_00265442	LM2	Turquoise
TCONS_00267433	LM2	Turquoise
TCONS_00267777	LM2	Turquoise
TCONS_00269320	LM2	Turquoise
TCONS_00269799	LM2	Turquoise
TCONS_00269854	LM2	Turquoise
TCONS_00269951	LM2	Turquoise
TCONS_00270860	LM2	Turquoise
TCONS_00271142	LM2	Turquoise
TCONS_00271628	LM2	Turquoise
TCONS_00271716	LM2	Turquoise
TCONS_00272761	LM2	Turquoise
TCONS_00272896	LM2	Turquoise
TCONS_00272982	LM2	Turquoise
TCONS_00273187	LM2	Turquoise
TCONS_00274085	LM2	Turquoise
TCONS_00274311	LM2	Turquoise
TCONS_00274611	LM2	Turquoise
TCONS_00274817	LM2	Turquoise
TCONS_00275665	LM2	Turquoise
TCONS_00276278	LM2	Turquoise
TCONS_00276577	LM2	Turquoise
TCONS_00276977	LM2	Turquoise
TCONS_00277417	LM2	Turquoise
TCONS_00277542	LM2	Turquoise
TCONS_00278066	LM2	Turquoise
TCONS_00278097	LM2	Turquoise
TCONS_00278973	LM2	Turquoise
TCONS_00279065	LM2	Turquoise
TCONS_00279105	LM2	Turquoise
TCONS_00280603	LM2	Turquoise
TCONS_00280726	LM2	Turquoise
TCONS_00282191	LM2	Turquoise
TCONS_00282200	LM2	Turquoise
TCONS_00283001	LM2	Turquoise
TCONS_00284705	LM2	Turquoise
TCONS_00286754	LM2	Turquoise
TCONS_00287760	LM2	Turquoise
TCONS_00288157	LM2	Turquoise
TCONS_00288762	LM2	Turquoise
TCONS_00288979	LM2	Turquoise
TCONS_00289175	LM2	Turquoise
TCONS_00289336	LM2	Turquoise
TCONS_00289398	LM2	Turquoise
TCONS_00290105	LM2	Turquoise
TCONS_00290107	LM2	Turquoise
TCONS_00290120	LM2	Turquoise
TCONS_00290121	LM2	Turquoise
TCONS_00290128	LM2	Turquoise
TCONS_00291477	LM2	Turquoise
TCONS_00291870	LM2	Turquoise
TCONS_00292368	LM2	Turquoise
TCONS_00292574	LM2	Turquoise
TCONS_00292694	LM2	Turquoise
TCONS_00294206	LM2	Turquoise
TCONS_00294336	LM2	Turquoise
TCONS_00294694	LM2	Turquoise
TCONS_00295134	LM2	Turquoise
TCONS_00296309	LM2	Turquoise
TCONS_00297109	LM2	Turquoise
TCONS_00298025	LM2	Turquoise
TCONS_00298096	LM2	Turquoise
TCONS_00298628	LM2	Turquoise
TCONS_00299489	LM2	Turquoise
TCONS_00299748	LM2	Turquoise
TCONS_00299822	LM2	Turquoise
TCONS_00300166	LM2	Turquoise
TCONS_00300174	LM2	Turquoise
TCONS_00300395	LM2	Turquoise
TCONS_00300417	LM2	Turquoise
TCONS_00300524	LM2	Turquoise
TCONS_00301744	LM2	Turquoise
TCONS_00301980	LM2	Turquoise
TCONS_00302103	LM2	Turquoise
TCONS_00302624	LM2	Turquoise
TCONS_00303225	LM2	Turquoise
TCONS_00303228	LM2	Turquoise
TCONS_00303357	LM2	Turquoise
TCONS_00303368	LM2	Turquoise
TCONS_00303394	LM2	Turquoise
TCONS_00303869	LM2	Turquoise
TCONS_00304989	LM2	Turquoise
TCONS_00305048	LM2	Turquoise
TCONS_00305372	LM2	Turquoise
TCONS_00305434	LM2	Turquoise
TCONS_00306773	LM2	Turquoise
TCONS_00307100	LM2	Turquoise
TCONS_00307506	LM2	Turquoise
TCONS_00307613	LM2	Turquoise
TCONS_00307614	LM2	Turquoise
TCONS_00308467	LM2	Turquoise
TCONS_00308476	LM2	Turquoise
TCONS_00308740	LM2	Turquoise
TCONS_00308799	LM2	Turquoise
TCONS_00309855	LM2	Turquoise
TCONS_00310224	LM2	Turquoise
TCONS_00310703	LM2	Turquoise
TCONS_00311123	LM2	Turquoise
TCONS_00311178	LM2	Turquoise
TCONS_00311577	LM2	Turquoise
TCONS_00312068	LM2	Turquoise
TCONS_00312194	LM2	Turquoise
TCONS_00312436	LM2	Turquoise
TCONS_00314370	LM2	Turquoise
TCONS_00314627	LM2	Turquoise
TCONS_00314643	LM2	Turquoise
TCONS_00315670	LM2	Turquoise
TCONS_00316167	LM2	Turquoise
TCONS_00316997	LM2	Turquoise
TCONS_00318015	LM2	Turquoise
TCONS_00318528	LM2	Turquoise
TCONS_00319577	LM2	Turquoise
TCONS_00319584	LM2	Turquoise
TCONS_00319642	LM2	Turquoise
TCONS_00321271	LM2	Turquoise
TCONS_00322272	LM2	Turquoise
TCONS_00323053	LM2	Turquoise
TCONS_00323805	LM2	Turquoise
TCONS_00323962	LM2	Turquoise
TCONS_00323970	LM2	Turquoise
TCONS_00324383	LM2	Turquoise
TCONS_00324939	LM2	Turquoise
TCONS_00325010	LM2	Turquoise
TCONS_00325222	LM2	Turquoise
TCONS_00325493	LM2	Turquoise
TCONS_00325510	LM2	Turquoise
TCONS_00325515	LM2	Turquoise
TCONS_00325533	LM2	Turquoise
TCONS_00325572	LM2	Turquoise
TCONS_00326058	LM2	Turquoise
TCONS_00326658	LM2	Turquoise
TCONS_00328146	LM2	Turquoise
TCONS_00328768	LM2	Turquoise
TCONS_00329141	LM2	Turquoise
TCONS_00330292	LM2	Turquoise
TCONS_00330429	LM2	Turquoise
TCONS_00330708	LM2	Turquoise
TCONS_00330910	LM2	Turquoise
TCONS_00331285	LM2	Turquoise
TCONS_00332125	LM2	Turquoise
TCONS_00332326	LM2	Turquoise
TCONS_00332727	LM2	Turquoise
TCONS_00333859	LM2	Turquoise
TCONS_00334309	LM2	Turquoise
TCONS_00334518	LM2	Turquoise
TCONS_00334903	LM2	Turquoise
TCONS_00335171	LM2	Turquoise
TCONS_00336124	LM2	Turquoise
TCONS_00336453	LM2	Turquoise
TCONS_00337003	LM2	Turquoise
TCONS_00337347	LM2	Turquoise
TCONS_00337736	LM2	Turquoise
TCONS_00338726	LM2	Turquoise
TCONS_00338838	LM2	Turquoise
TCONS_00340441	LM2	Turquoise
TCONS_00340789	LM2	Turquoise
TCONS_00340794	LM2	Turquoise
TCONS_00340891	LM2	Turquoise
TCONS_00341014	LM2	Turquoise
TCONS_00341430	LM2	Turquoise
TCONS_00342708	LM2	Turquoise
TCONS_00343446	LM2	Turquoise
TCONS_00343659	LM2	Turquoise
TCONS_00344138	LM2	Turquoise
TCONS_00344722	LM2	Turquoise
TCONS_00345345	LM2	Turquoise
TCONS_00345408	LM2	Turquoise
TCONS_00345836	LM2	Turquoise
TCONS_00346142	LM2	Turquoise
TCONS_00347541	LM2	Turquoise
TCONS_00348124	LM2	Turquoise
TCONS_00348381	LM2	Turquoise
TCONS_00349640	LM2	Turquoise
TCONS_00349687	LM2	Turquoise
TCONS_00349740	LM2	Turquoise
TCONS_00350190	LM2	Turquoise
TCONS_00350506	LM2	Turquoise
TCONS_00351612	LM2	Turquoise
TCONS_00351678	LM2	Turquoise
TCONS_00351940	LM2	Turquoise
TCONS_00351969	LM2	Turquoise
TCONS_00352234	LM2	Turquoise
TCONS_00352767	LM2	Turquoise
TCONS_00352787	LM2	Turquoise
TCONS_00353831	LM2	Turquoise
TCONS_00353877	LM2	Turquoise
TCONS_00354119	LM2	Turquoise
TCONS_00354467	LM2	Turquoise
TCONS_00355588	LM2	Turquoise
TCONS_00360520	LM2	Turquoise
TCONS_00361866	LM2	Turquoise
TCONS_00362381	LM2	Turquoise
TCONS_00363845	LM2	Turquoise
TCONS_00364838	LM2	Turquoise
TCONS_00365085	LM2	Turquoise
TCONS_00366090	LM2	Turquoise
TCONS_00366091	LM2	Turquoise
TCONS_00366535	LM2	Turquoise
TCONS_00367605	LM2	Turquoise
TCONS_00367847	LM2	Turquoise
TCONS_00367984	LM2	Turquoise
TCONS_00368720	LM2	Turquoise
TCONS_00369376	LM2	Turquoise
TCONS_00369547	LM2	Turquoise
TCONS_00370058	LM2	Turquoise
TCONS_00370275	LM2	Turquoise
TCONS_00370958	LM2	Turquoise
TCONS_00372177	LM2	Turquoise
TCONS_00372839	LM2	Turquoise
TCONS_00372957	LM2	Turquoise
TCONS_00373134	LM2	Turquoise
TCONS_00373333	LM2	Turquoise
TCONS_00373805	LM2	Turquoise
TCONS_00374124	LM2	Turquoise
TCONS_00374189	LM2	Turquoise
TCONS_00375080	LM2	Turquoise
TCONS_00375369	LM2	Turquoise
TCONS_00375604	LM2	Turquoise
TCONS_00377280	LM2	Turquoise
TCONS_00377455	LM2	Turquoise
TCONS_00018999	LM3	Brown
TCONS_00019766	LM3	Brown
TCONS_00020100	LM3	Brown
TCONS_00020523	LM3	Brown
TCONS_00026138	LM3	Brown
TCONS_00030702	LM3	Brown
TCONS_00033574	LM3	Brown
TCONS_00040333	LM3	Brown
TCONS_00043078	LM3	Brown
TCONS_00051209	LM3	Brown
TCONS_00063555	LM3	Brown
TCONS_00069039	LM3	Brown
TCONS_00073045	LM3	Brown
TCONS_00074028	LM3	Brown
TCONS_00077511	LM3	Brown
TCONS_00079713	LM3	Brown
TCONS_00083523	LM3	Brown
TCONS_00085143	LM3	Brown
TCONS_00087718	LM3	Brown
TCONS_00091422	LM3	Brown
TCONS_00099614	LM3	Brown
TCONS_00102188	LM3	Brown
TCONS_00111305	LM3	Brown
TCONS_00111478	LM3	Brown
TCONS_00114387	LM3	Brown
TCONS_00115401	LM3	Brown
TCONS_00135304	LM3	Brown
TCONS_00139551	LM3	Brown
TCONS_00147139	LM3	Brown
TCONS_00148080	LM3	Brown
TCONS_00153229	LM3	Brown
TCONS_00158267	LM3	Brown
TCONS_00159731	LM3	Brown
TCONS_00161515	LM3	Brown
TCONS_00163894	LM3	Brown
TCONS_00169548	LM3	Brown
TCONS_00170227	LM3	Brown
TCONS_00179589	LM3	Brown
TCONS_00186886	LM3	Brown
TCONS_00190343	LM3	Brown
TCONS_00194674	LM3	Brown
TCONS_00215301	LM3	Brown
TCONS_00217435	LM3	Brown
TCONS_00217885	LM3	Brown
TCONS_00221545	LM3	Brown
TCONS_00221769	LM3	Brown
TCONS_00222664	LM3	Brown
TCONS_00223718	LM3	Brown
TCONS_00223939	LM3	Brown
TCONS_00224418	LM3	Brown
TCONS_00225216	LM3	Brown
TCONS_00227965	LM3	Brown
TCONS_00229224	LM3	Brown
TCONS_00229811	LM3	Brown
TCONS_00234252	LM3	Brown
TCONS_00238805	LM3	Brown
TCONS_00241326	LM3	Brown
TCONS_00243437	LM3	Brown
TCONS_00243753	LM3	Brown
TCONS_00254009	LM3	Brown
TCONS_00255701	LM3	Brown
TCONS_00257278	LM3	Brown
TCONS_00265472	LM3	Brown
TCONS_00267172	LM3	Brown
TCONS_00269905	LM3	Brown
TCONS_00280047	LM3	Brown
TCONS_00282798	LM3	Brown
TCONS_00295790	LM3	Brown
TCONS_00305359	LM3	Brown
TCONS_00315676	LM3	Brown
TCONS_00319085	LM3	Brown
TCONS_00332353	LM3	Brown
TCONS_00335966	LM3	Brown
TCONS_00336301	LM3	Brown
TCONS_00337343	LM3	Brown
TCONS_00340185	LM3	Brown
TCONS_00344716	LM3	Brown
TCONS_00350066	LM3	Brown
TCONS_00368505	LM3	Brown
TCONS_00373161	LM3	Brown
TCONS_00006161	LM4	Green
TCONS_00010022	LM4	Green
TCONS_00016033	LM4	Green
TCONS_00029537	LM4	Green
TCONS_00032069	LM4	Green
TCONS_00034759	LM4	Green
TCONS_00035804	LM4	Green
TCONS_00037565	LM4	Green
TCONS_00041527	LM4	Green
TCONS_00043833	LM4	Green
TCONS_00051806	LM4	Green
TCONS_00057049	LM4	Green
TCONS_00071922	LM4	Green
TCONS_00075509	LM4	Green
TCONS_00085717	LM4	Green
TCONS_00090742	LM4	Green
TCONS_00091218	LM4	Green
TCONS_00111082	LM4	Green
TCONS_00114151	LM4	Green
TCONS_00116799	LM4	Green
TCONS_00125686	LM4	Green
TCONS_00125711	LM4	Green
TCONS_00149101	LM4	Green
TCONS_00155462	LM4	Green
TCONS_00155693	LM4	Green
TCONS_00162458	LM4	Green
TCONS_00166002	LM4	Green
TCONS_00167835	LM4	Green
TCONS_00171664	LM4	Green
TCONS_00173158	LM4	Green
TCONS_00175712	LM4	Green
TCONS_00176521	LM4	Green
TCONS_00180455	LM4	Green
TCONS_00194588	LM4	Green
TCONS_00196001	LM4	Green
TCONS_00204033	LM4	Green
TCONS_00206718	LM4	Green
TCONS_00217287	LM4	Green
TCONS_00218263	LM4	Green
TCONS_00226278	LM4	Green
TCONS_00234180	LM4	Green
TCONS_00234187	LM4	Green
TCONS_00241007	LM4	Green
TCONS_00243713	LM4	Green
TCONS_00259625	LM4	Green
TCONS_00277523	LM4	Green
TCONS_00279762	LM4	Green
TCONS_00287174	LM4	Green
TCONS_00296925	LM4	Green
TCONS_00305376	LM4	Green
TCONS_00342053	LM4	Green
TCONS_00348980	LM4	Green
TCONS_00355548	LM4	Green
TCONS_00369499	LM4	Green
TCONS_00375858	LM4	Green
TCONS_00376583	LM4	Green
TCONS_00377317	LM4	Green
TCONS_00007663	LM5	Yellow
TCONS_00012411	LM5	Yellow
TCONS_00029287	LM5	Yellow
TCONS_00033113	LM5	Yellow
TCONS_00035761	LM5	Yellow
TCONS_00044012	LM5	Yellow
TCONS_00048236	LM5	Yellow
TCONS_00051064	LM5	Yellow
TCONS_00052217	LM5	Yellow
TCONS_00061862	LM5	Yellow
TCONS_00063567	LM5	Yellow
TCONS_00069481	LM5	Yellow
TCONS_00072060	LM5	Yellow
TCONS_00072631	LM5	Yellow
TCONS_00077212	LM5	Yellow
TCONS_00088526	LM5	Yellow
TCONS_00091479	LM5	Yellow
TCONS_00096683	LM5	Yellow
TCONS_00102111	LM5	Yellow
TCONS_00105124	LM5	Yellow
TCONS_00105854	LM5	Yellow
TCONS_00107843	LM5	Yellow
TCONS_00115197	LM5	Yellow
TCONS_00116968	LM5	Yellow
TCONS_00118577	LM5	Yellow
TCONS_00125497	LM5	Yellow
TCONS_00129633	LM5	Yellow
TCONS_00138998	LM5	Yellow
TCONS_00147447	LM5	Yellow
TCONS_00149174	LM5	Yellow
TCONS_00151894	LM5	Yellow
TCONS_00152842	LM5	Yellow
TCONS_00159212	LM5	Yellow
TCONS_00174158	LM5	Yellow
TCONS_00182798	LM5	Yellow
TCONS_00184336	LM5	Yellow
TCONS_00187125	LM5	Yellow
TCONS_00200189	LM5	Yellow
TCONS_00200571	LM5	Yellow
TCONS_00203058	LM5	Yellow
TCONS_00212599	LM5	Yellow
TCONS_00216226	LM5	Yellow
TCONS_00218187	LM5	Yellow
TCONS_00221684	LM5	Yellow
TCONS_00224240	LM5	Yellow
TCONS_00226074	LM5	Yellow
TCONS_00226686	LM5	Yellow
TCONS_00231077	LM5	Yellow
TCONS_00232083	LM5	Yellow
TCONS_00241604	LM5	Yellow
TCONS_00253658	LM5	Yellow
TCONS_00266519	LM5	Yellow
TCONS_00271289	LM5	Yellow
TCONS_00276251	LM5	Yellow
TCONS_00278845	LM5	Yellow
TCONS_00278898	LM5	Yellow
TCONS_00279999	LM5	Yellow
TCONS_00302105	LM5	Yellow
TCONS_00302201	LM5	Yellow
TCONS_00309027	LM5	Yellow
TCONS_00311381	LM5	Yellow
TCONS_00319365	LM5	Yellow
TCONS_00319874	LM5	Yellow
TCONS_00331677	LM5	Yellow
TCONS_00332244	LM5	Yellow
TCONS_00332620	LM5	Yellow
TCONS_00335813	LM5	Yellow
TCONS_00340911	LM5	Yellow
TCONS_00346959	LM5	Yellow
TCONS_00371240	LM5	Yellow
TCONS_00374187	LM5	Yellow
TCONS_00377658	LM5	Yellow
TCONS_00004953	LM6	Red
TCONS_00005606	LM6	Red
TCONS_00009004	LM6	Red
TCONS_00020313	LM6	Red
TCONS_00022186	LM6	Red
TCONS_00050166	LM6	Red
TCONS_00061302	LM6	Red
TCONS_00066874	LM6	Red
TCONS_00069213	LM6	Red
TCONS_00079720	LM6	Red
TCONS_00083258	LM6	Red
TCONS_00086083	LM6	Red
TCONS_00087671	LM6	Red
TCONS_00097020	LM6	Red
TCONS_00100379	LM6	Red
TCONS_00117631	LM6	Red
TCONS_00119890	LM6	Red
TCONS_00129157	LM6	Red
TCONS_00138361	LM6	Red
TCONS_00155043	LM6	Red
TCONS_00160882	LM6	Red
TCONS_00164012	LM6	Red
TCONS_00168620	LM6	Red
TCONS_00172131	LM6	Red
TCONS_00184832	LM6	Red
TCONS_00189314	LM6	Red
TCONS_00197017	LM6	Red
TCONS_00204507	LM6	Red
TCONS_00207333	LM6	Red
TCONS_00214169	LM6	Red
TCONS_00215783	LM6	Red
TCONS_00222316	LM6	Red
TCONS_00234745	LM6	Red
TCONS_00237006	LM6	Red
TCONS_00239513	LM6	Red
TCONS_00245565	LM6	Red
TCONS_00263376	LM6	Red
TCONS_00270209	LM6	Red
TCONS_00293396	LM6	Red
TCONS_00296516	LM6	Red
TCONS_00300521	LM6	Red
TCONS_00313997	LM6	Red
TCONS_00318637	LM6	Red
TCONS_00340782	LM6	Red
TCONS_00343482	LM6	Red
TCONS_00364715	LM6	Red
TCONS_00376338	LM6	Red
TCONS_00009078	LM7	Black
TCONS_00010408	LM7	Black
TCONS_00019894	LM7	Black
TCONS_00032505	LM7	Black
TCONS_00033425	LM7	Black
TCONS_00043106	LM7	Black
TCONS_00044411	LM7	Black
TCONS_00055573	LM7	Black
TCONS_00055577	LM7	Black
TCONS_00056557	LM7	Black
TCONS_00058059	LM7	Black
TCONS_00058781	LM7	Black
TCONS_00062753	LM7	Black
TCONS_00065581	LM7	Black
TCONS_00086754	LM7	Black
TCONS_00099198	LM7	Black
TCONS_00116717	LM7	Black
TCONS_00129492	LM7	Black
TCONS_00144588	LM7	Black
TCONS_00154401	LM7	Black
TCONS_00154591	LM7	Black
TCONS_00158438	LM7	Black
TCONS_00165042	LM7	Black
TCONS_00165639	LM7	Black
TCONS_00175175	LM7	Black
TCONS_00177049	LM7	Black
TCONS_00185261	LM7	Black
TCONS_00203336	LM7	Black
TCONS_00206657	LM7	Black
TCONS_00209399	LM7	Black
TCONS_00234185	LM7	Black
TCONS_00239302	LM7	Black
TCONS_00245087	LM7	Black
TCONS_00259582	LM7	Black
TCONS_00267003	LM7	Black
TCONS_00271881	LM7	Black
TCONS_00279103	LM7	Black
TCONS_00280789	LM7	Black
TCONS_00312840	LM7	Black
TCONS_00313665	LM7	Black
TCONS_00332445	LM7	Black
TCONS_00333275	LM7	Black
TCONS_00333902	LM7	Black
TCONS_00348673	LM7	Black
TCONS_00359374	LM7	Black
TCONS_00364641	LM7	Black
