# Supplementary material for: RNA-Seq Implies Divergent Regulation Patterns of LincRNA on Spermatogenesis and Testis Growth in Goats
Source: Animals (Basel). 2021 Feb 26;11(3):625. doi: 10.3390/ani11030625 (PMC7996862; doi:10.3390/ani11030625)
Supplement: Supplementary file 1 [file animals-11-00625-s001.zip › Table S6.xlsx]

## Sheet: Table S6
Ensembl accession	Module	Module color
ENSCHIG00000000032	MM1	Blue
ENSCHIG00000000046	MM1	Blue
ENSCHIG00000000048	MM1	Blue
ENSCHIG00000000054	MM1	Blue
ENSCHIG00000000055	MM1	Blue
ENSCHIG00000000058	MM1	Blue
ENSCHIG00000000064	MM1	Blue
ENSCHIG00000000066	MM1	Blue
ENSCHIG00000000074	MM1	Blue
ENSCHIG00000000083	MM1	Blue
ENSCHIG00000000086	MM1	Blue
ENSCHIG00000000087	MM1	Blue
ENSCHIG00000000090	MM1	Blue
ENSCHIG00000000099	MM1	Blue
ENSCHIG00000000104	MM1	Blue
ENSCHIG00000000123	MM1	Blue
ENSCHIG00000000125	MM1	Blue
ENSCHIG00000000136	MM1	Blue
ENSCHIG00000000141	MM1	Blue
ENSCHIG00000000148	MM1	Blue
ENSCHIG00000000151	MM1	Blue
ENSCHIG00000000157	MM1	Blue
ENSCHIG00000000160	MM1	Blue
ENSCHIG00000000165	MM1	Blue
ENSCHIG00000000176	MM1	Blue
ENSCHIG00000000179	MM1	Blue
ENSCHIG00000000183	MM1	Blue
ENSCHIG00000000187	MM1	Blue
ENSCHIG00000000188	MM1	Blue
ENSCHIG00000000192	MM1	Blue
ENSCHIG00000000195	MM1	Blue
ENSCHIG00000000209	MM1	Blue
ENSCHIG00000000210	MM1	Blue
ENSCHIG00000000215	MM1	Blue
ENSCHIG00000000216	MM1	Blue
ENSCHIG00000000220	MM1	Blue
ENSCHIG00000000231	MM1	Blue
ENSCHIG00000000257	MM1	Blue
ENSCHIG00000000261	MM1	Blue
ENSCHIG00000000271	MM1	Blue
ENSCHIG00000000272	MM1	Blue
ENSCHIG00000000311	MM1	Blue
ENSCHIG00000000317	MM1	Blue
ENSCHIG00000000318	MM1	Blue
ENSCHIG00000000332	MM1	Blue
ENSCHIG00000000335	MM1	Blue
ENSCHIG00000000336	MM1	Blue
ENSCHIG00000000338	MM1	Blue
ENSCHIG00000000339	MM1	Blue
ENSCHIG00000000340	MM1	Blue
ENSCHIG00000000353	MM1	Blue
ENSCHIG00000000366	MM1	Blue
ENSCHIG00000000385	MM1	Blue
ENSCHIG00000000394	MM1	Blue
ENSCHIG00000000420	MM1	Blue
ENSCHIG00000000428	MM1	Blue
ENSCHIG00000000446	MM1	Blue
ENSCHIG00000000447	MM1	Blue
ENSCHIG00000000451	MM1	Blue
ENSCHIG00000000465	MM1	Blue
ENSCHIG00000000469	MM1	Blue
ENSCHIG00000000473	MM1	Blue
ENSCHIG00000000489	MM1	Blue
ENSCHIG00000000496	MM1	Blue
ENSCHIG00000000508	MM1	Blue
ENSCHIG00000000510	MM1	Blue
ENSCHIG00000000511	MM1	Blue
ENSCHIG00000000529	MM1	Blue
ENSCHIG00000000536	MM1	Blue
ENSCHIG00000000545	MM1	Blue
ENSCHIG00000000578	MM1	Blue
ENSCHIG00000000591	MM1	Blue
ENSCHIG00000000627	MM1	Blue
ENSCHIG00000000726	MM1	Blue
ENSCHIG00000000762	MM1	Blue
ENSCHIG00000000782	MM1	Blue
ENSCHIG00000000850	MM1	Blue
ENSCHIG00000000860	MM1	Blue
ENSCHIG00000000883	MM1	Blue
ENSCHIG00000000979	MM1	Blue
ENSCHIG00000001097	MM1	Blue
ENSCHIG00000001103	MM1	Blue
ENSCHIG00000001113	MM1	Blue
ENSCHIG00000001135	MM1	Blue
ENSCHIG00000001236	MM1	Blue
ENSCHIG00000001253	MM1	Blue
ENSCHIG00000001317	MM1	Blue
ENSCHIG00000001334	MM1	Blue
ENSCHIG00000001357	MM1	Blue
ENSCHIG00000001384	MM1	Blue
ENSCHIG00000001538	MM1	Blue
ENSCHIG00000001552	MM1	Blue
ENSCHIG00000001570	MM1	Blue
ENSCHIG00000001685	MM1	Blue
ENSCHIG00000001744	MM1	Blue
ENSCHIG00000001747	MM1	Blue
ENSCHIG00000001759	MM1	Blue
ENSCHIG00000001766	MM1	Blue
ENSCHIG00000001779	MM1	Blue
ENSCHIG00000001781	MM1	Blue
ENSCHIG00000001826	MM1	Blue
ENSCHIG00000001835	MM1	Blue
ENSCHIG00000001840	MM1	Blue
ENSCHIG00000001851	MM1	Blue
ENSCHIG00000001875	MM1	Blue
ENSCHIG00000001878	MM1	Blue
ENSCHIG00000002050	MM1	Blue
ENSCHIG00000002069	MM1	Blue
ENSCHIG00000002074	MM1	Blue
ENSCHIG00000002096	MM1	Blue
ENSCHIG00000002126	MM1	Blue
ENSCHIG00000002136	MM1	Blue
ENSCHIG00000002177	MM1	Blue
ENSCHIG00000002207	MM1	Blue
ENSCHIG00000002212	MM1	Blue
ENSCHIG00000002220	MM1	Blue
ENSCHIG00000002265	MM1	Blue
ENSCHIG00000002303	MM1	Blue
ENSCHIG00000002315	MM1	Blue
ENSCHIG00000002321	MM1	Blue
ENSCHIG00000002384	MM1	Blue
ENSCHIG00000002390	MM1	Blue
ENSCHIG00000002414	MM1	Blue
ENSCHIG00000002417	MM1	Blue
ENSCHIG00000002435	MM1	Blue
ENSCHIG00000002460	MM1	Blue
ENSCHIG00000002467	MM1	Blue
ENSCHIG00000002483	MM1	Blue
ENSCHIG00000002488	MM1	Blue
ENSCHIG00000002545	MM1	Blue
ENSCHIG00000002571	MM1	Blue
ENSCHIG00000002572	MM1	Blue
ENSCHIG00000002609	MM1	Blue
ENSCHIG00000002674	MM1	Blue
ENSCHIG00000002699	MM1	Blue
ENSCHIG00000002772	MM1	Blue
ENSCHIG00000002786	MM1	Blue
ENSCHIG00000002880	MM1	Blue
ENSCHIG00000002881	MM1	Blue
ENSCHIG00000002914	MM1	Blue
ENSCHIG00000002948	MM1	Blue
ENSCHIG00000002972	MM1	Blue
ENSCHIG00000002998	MM1	Blue
ENSCHIG00000003005	MM1	Blue
ENSCHIG00000003024	MM1	Blue
ENSCHIG00000003026	MM1	Blue
ENSCHIG00000003048	MM1	Blue
ENSCHIG00000003060	MM1	Blue
ENSCHIG00000003066	MM1	Blue
ENSCHIG00000003108	MM1	Blue
ENSCHIG00000003115	MM1	Blue
ENSCHIG00000003128	MM1	Blue
ENSCHIG00000003139	MM1	Blue
ENSCHIG00000003141	MM1	Blue
ENSCHIG00000003162	MM1	Blue
ENSCHIG00000003168	MM1	Blue
ENSCHIG00000003220	MM1	Blue
ENSCHIG00000003269	MM1	Blue
ENSCHIG00000003280	MM1	Blue
ENSCHIG00000003295	MM1	Blue
ENSCHIG00000003323	MM1	Blue
ENSCHIG00000003373	MM1	Blue
ENSCHIG00000003436	MM1	Blue
ENSCHIG00000003451	MM1	Blue
ENSCHIG00000003466	MM1	Blue
ENSCHIG00000003467	MM1	Blue
ENSCHIG00000003469	MM1	Blue
ENSCHIG00000003490	MM1	Blue
ENSCHIG00000003537	MM1	Blue
ENSCHIG00000003580	MM1	Blue
ENSCHIG00000003583	MM1	Blue
ENSCHIG00000003622	MM1	Blue
ENSCHIG00000003641	MM1	Blue
ENSCHIG00000003703	MM1	Blue
ENSCHIG00000003717	MM1	Blue
ENSCHIG00000003722	MM1	Blue
ENSCHIG00000003751	MM1	Blue
ENSCHIG00000003756	MM1	Blue
ENSCHIG00000003767	MM1	Blue
ENSCHIG00000003781	MM1	Blue
ENSCHIG00000003791	MM1	Blue
ENSCHIG00000003817	MM1	Blue
ENSCHIG00000003835	MM1	Blue
ENSCHIG00000003841	MM1	Blue
ENSCHIG00000003966	MM1	Blue
ENSCHIG00000003988	MM1	Blue
ENSCHIG00000003998	MM1	Blue
ENSCHIG00000004003	MM1	Blue
ENSCHIG00000004028	MM1	Blue
ENSCHIG00000004099	MM1	Blue
ENSCHIG00000004109	MM1	Blue
ENSCHIG00000004169	MM1	Blue
ENSCHIG00000004177	MM1	Blue
ENSCHIG00000004186	MM1	Blue
ENSCHIG00000004189	MM1	Blue
ENSCHIG00000004195	MM1	Blue
ENSCHIG00000004233	MM1	Blue
ENSCHIG00000004248	MM1	Blue
ENSCHIG00000004260	MM1	Blue
ENSCHIG00000004352	MM1	Blue
ENSCHIG00000004353	MM1	Blue
ENSCHIG00000004355	MM1	Blue
ENSCHIG00000004366	MM1	Blue
ENSCHIG00000004372	MM1	Blue
ENSCHIG00000004376	MM1	Blue
ENSCHIG00000004432	MM1	Blue
ENSCHIG00000004449	MM1	Blue
ENSCHIG00000004503	MM1	Blue
ENSCHIG00000004535	MM1	Blue
ENSCHIG00000004574	MM1	Blue
ENSCHIG00000004618	MM1	Blue
ENSCHIG00000004660	MM1	Blue
ENSCHIG00000004710	MM1	Blue
ENSCHIG00000004741	MM1	Blue
ENSCHIG00000004757	MM1	Blue
ENSCHIG00000004770	MM1	Blue
ENSCHIG00000004811	MM1	Blue
ENSCHIG00000004840	MM1	Blue
ENSCHIG00000004865	MM1	Blue
ENSCHIG00000004885	MM1	Blue
ENSCHIG00000004892	MM1	Blue
ENSCHIG00000004901	MM1	Blue
ENSCHIG00000004991	MM1	Blue
ENSCHIG00000005020	MM1	Blue
ENSCHIG00000005039	MM1	Blue
ENSCHIG00000005059	MM1	Blue
ENSCHIG00000005124	MM1	Blue
ENSCHIG00000005138	MM1	Blue
ENSCHIG00000005158	MM1	Blue
ENSCHIG00000005197	MM1	Blue
ENSCHIG00000005255	MM1	Blue
ENSCHIG00000005265	MM1	Blue
ENSCHIG00000005308	MM1	Blue
ENSCHIG00000005312	MM1	Blue
ENSCHIG00000005337	MM1	Blue
ENSCHIG00000005346	MM1	Blue
ENSCHIG00000005363	MM1	Blue
ENSCHIG00000005388	MM1	Blue
ENSCHIG00000005396	MM1	Blue
ENSCHIG00000005444	MM1	Blue
ENSCHIG00000005517	MM1	Blue
ENSCHIG00000005553	MM1	Blue
ENSCHIG00000005556	MM1	Blue
ENSCHIG00000005576	MM1	Blue
ENSCHIG00000005579	MM1	Blue
ENSCHIG00000005599	MM1	Blue
ENSCHIG00000005720	MM1	Blue
ENSCHIG00000005726	MM1	Blue
ENSCHIG00000005742	MM1	Blue
ENSCHIG00000005763	MM1	Blue
ENSCHIG00000005785	MM1	Blue
ENSCHIG00000005800	MM1	Blue
ENSCHIG00000005840	MM1	Blue
ENSCHIG00000005856	MM1	Blue
ENSCHIG00000005859	MM1	Blue
ENSCHIG00000005914	MM1	Blue
ENSCHIG00000005917	MM1	Blue
ENSCHIG00000005925	MM1	Blue
ENSCHIG00000005944	MM1	Blue
ENSCHIG00000005946	MM1	Blue
ENSCHIG00000005950	MM1	Blue
ENSCHIG00000006032	MM1	Blue
ENSCHIG00000006049	MM1	Blue
ENSCHIG00000006052	MM1	Blue
ENSCHIG00000006072	MM1	Blue
ENSCHIG00000006080	MM1	Blue
ENSCHIG00000006082	MM1	Blue
ENSCHIG00000006087	MM1	Blue
ENSCHIG00000006157	MM1	Blue
ENSCHIG00000006200	MM1	Blue
ENSCHIG00000006239	MM1	Blue
ENSCHIG00000006243	MM1	Blue
ENSCHIG00000006250	MM1	Blue
ENSCHIG00000006291	MM1	Blue
ENSCHIG00000006292	MM1	Blue
ENSCHIG00000006313	MM1	Blue
ENSCHIG00000006366	MM1	Blue
ENSCHIG00000006390	MM1	Blue
ENSCHIG00000006429	MM1	Blue
ENSCHIG00000006432	MM1	Blue
ENSCHIG00000006439	MM1	Blue
ENSCHIG00000006446	MM1	Blue
ENSCHIG00000006466	MM1	Blue
ENSCHIG00000006499	MM1	Blue
ENSCHIG00000006508	MM1	Blue
ENSCHIG00000006533	MM1	Blue
ENSCHIG00000006554	MM1	Blue
ENSCHIG00000006564	MM1	Blue
ENSCHIG00000006574	MM1	Blue
ENSCHIG00000006588	MM1	Blue
ENSCHIG00000006611	MM1	Blue
ENSCHIG00000006614	MM1	Blue
ENSCHIG00000006615	MM1	Blue
ENSCHIG00000006620	MM1	Blue
ENSCHIG00000006651	MM1	Blue
ENSCHIG00000006661	MM1	Blue
ENSCHIG00000006689	MM1	Blue
ENSCHIG00000006694	MM1	Blue
ENSCHIG00000006722	MM1	Blue
ENSCHIG00000006732	MM1	Blue
ENSCHIG00000006747	MM1	Blue
ENSCHIG00000006757	MM1	Blue
ENSCHIG00000006765	MM1	Blue
ENSCHIG00000006795	MM1	Blue
ENSCHIG00000006804	MM1	Blue
ENSCHIG00000006822	MM1	Blue
ENSCHIG00000006835	MM1	Blue
ENSCHIG00000006855	MM1	Blue
ENSCHIG00000006866	MM1	Blue
ENSCHIG00000006873	MM1	Blue
ENSCHIG00000006874	MM1	Blue
ENSCHIG00000006898	MM1	Blue
ENSCHIG00000006928	MM1	Blue
ENSCHIG00000007090	MM1	Blue
ENSCHIG00000007130	MM1	Blue
ENSCHIG00000007156	MM1	Blue
ENSCHIG00000007158	MM1	Blue
ENSCHIG00000007182	MM1	Blue
ENSCHIG00000007252	MM1	Blue
ENSCHIG00000007261	MM1	Blue
ENSCHIG00000007290	MM1	Blue
ENSCHIG00000007296	MM1	Blue
ENSCHIG00000007307	MM1	Blue
ENSCHIG00000007316	MM1	Blue
ENSCHIG00000007326	MM1	Blue
ENSCHIG00000007336	MM1	Blue
ENSCHIG00000007347	MM1	Blue
ENSCHIG00000007443	MM1	Blue
ENSCHIG00000007469	MM1	Blue
ENSCHIG00000007482	MM1	Blue
ENSCHIG00000007485	MM1	Blue
ENSCHIG00000007490	MM1	Blue
ENSCHIG00000007599	MM1	Blue
ENSCHIG00000007617	MM1	Blue
ENSCHIG00000007641	MM1	Blue
ENSCHIG00000007657	MM1	Blue
ENSCHIG00000007658	MM1	Blue
ENSCHIG00000007673	MM1	Blue
ENSCHIG00000007675	MM1	Blue
ENSCHIG00000007679	MM1	Blue
ENSCHIG00000007682	MM1	Blue
ENSCHIG00000007683	MM1	Blue
ENSCHIG00000007689	MM1	Blue
ENSCHIG00000007715	MM1	Blue
ENSCHIG00000007720	MM1	Blue
ENSCHIG00000007723	MM1	Blue
ENSCHIG00000007737	MM1	Blue
ENSCHIG00000007747	MM1	Blue
ENSCHIG00000007752	MM1	Blue
ENSCHIG00000007759	MM1	Blue
ENSCHIG00000007774	MM1	Blue
ENSCHIG00000007788	MM1	Blue
ENSCHIG00000007792	MM1	Blue
ENSCHIG00000007797	MM1	Blue
ENSCHIG00000007833	MM1	Blue
ENSCHIG00000007834	MM1	Blue
ENSCHIG00000007852	MM1	Blue
ENSCHIG00000007873	MM1	Blue
ENSCHIG00000007888	MM1	Blue
ENSCHIG00000007909	MM1	Blue
ENSCHIG00000007910	MM1	Blue
ENSCHIG00000007926	MM1	Blue
ENSCHIG00000007927	MM1	Blue
ENSCHIG00000007935	MM1	Blue
ENSCHIG00000007965	MM1	Blue
ENSCHIG00000007984	MM1	Blue
ENSCHIG00000007991	MM1	Blue
ENSCHIG00000007996	MM1	Blue
ENSCHIG00000007997	MM1	Blue
ENSCHIG00000008025	MM1	Blue
ENSCHIG00000008029	MM1	Blue
ENSCHIG00000008033	MM1	Blue
ENSCHIG00000008050	MM1	Blue
ENSCHIG00000008054	MM1	Blue
ENSCHIG00000008057	MM1	Blue
ENSCHIG00000008068	MM1	Blue
ENSCHIG00000008074	MM1	Blue
ENSCHIG00000008078	MM1	Blue
ENSCHIG00000008088	MM1	Blue
ENSCHIG00000008090	MM1	Blue
ENSCHIG00000008099	MM1	Blue
ENSCHIG00000008103	MM1	Blue
ENSCHIG00000008110	MM1	Blue
ENSCHIG00000008129	MM1	Blue
ENSCHIG00000008137	MM1	Blue
ENSCHIG00000008143	MM1	Blue
ENSCHIG00000008152	MM1	Blue
ENSCHIG00000008173	MM1	Blue
ENSCHIG00000008185	MM1	Blue
ENSCHIG00000008223	MM1	Blue
ENSCHIG00000008235	MM1	Blue
ENSCHIG00000008236	MM1	Blue
ENSCHIG00000008258	MM1	Blue
ENSCHIG00000008271	MM1	Blue
ENSCHIG00000008287	MM1	Blue
ENSCHIG00000008306	MM1	Blue
ENSCHIG00000008308	MM1	Blue
ENSCHIG00000008323	MM1	Blue
ENSCHIG00000008350	MM1	Blue
ENSCHIG00000008361	MM1	Blue
ENSCHIG00000008363	MM1	Blue
ENSCHIG00000008366	MM1	Blue
ENSCHIG00000008370	MM1	Blue
ENSCHIG00000008376	MM1	Blue
ENSCHIG00000008378	MM1	Blue
ENSCHIG00000008381	MM1	Blue
ENSCHIG00000008405	MM1	Blue
ENSCHIG00000008414	MM1	Blue
ENSCHIG00000008436	MM1	Blue
ENSCHIG00000008445	MM1	Blue
ENSCHIG00000008471	MM1	Blue
ENSCHIG00000008473	MM1	Blue
ENSCHIG00000008490	MM1	Blue
ENSCHIG00000008493	MM1	Blue
ENSCHIG00000008499	MM1	Blue
ENSCHIG00000008501	MM1	Blue
ENSCHIG00000008504	MM1	Blue
ENSCHIG00000008506	MM1	Blue
ENSCHIG00000008511	MM1	Blue
ENSCHIG00000008519	MM1	Blue
ENSCHIG00000008524	MM1	Blue
ENSCHIG00000008532	MM1	Blue
ENSCHIG00000008542	MM1	Blue
ENSCHIG00000008543	MM1	Blue
ENSCHIG00000008546	MM1	Blue
ENSCHIG00000008547	MM1	Blue
ENSCHIG00000008548	MM1	Blue
ENSCHIG00000008550	MM1	Blue
ENSCHIG00000008559	MM1	Blue
ENSCHIG00000008571	MM1	Blue
ENSCHIG00000008590	MM1	Blue
ENSCHIG00000008594	MM1	Blue
ENSCHIG00000008597	MM1	Blue
ENSCHIG00000008598	MM1	Blue
ENSCHIG00000008605	MM1	Blue
ENSCHIG00000008614	MM1	Blue
ENSCHIG00000008626	MM1	Blue
ENSCHIG00000008630	MM1	Blue
ENSCHIG00000008639	MM1	Blue
ENSCHIG00000008655	MM1	Blue
ENSCHIG00000008665	MM1	Blue
ENSCHIG00000008676	MM1	Blue
ENSCHIG00000008683	MM1	Blue
ENSCHIG00000008699	MM1	Blue
ENSCHIG00000008700	MM1	Blue
ENSCHIG00000008701	MM1	Blue
ENSCHIG00000008710	MM1	Blue
ENSCHIG00000008713	MM1	Blue
ENSCHIG00000008721	MM1	Blue
ENSCHIG00000008724	MM1	Blue
ENSCHIG00000008725	MM1	Blue
ENSCHIG00000008745	MM1	Blue
ENSCHIG00000008764	MM1	Blue
ENSCHIG00000008765	MM1	Blue
ENSCHIG00000008767	MM1	Blue
ENSCHIG00000008768	MM1	Blue
ENSCHIG00000008775	MM1	Blue
ENSCHIG00000008802	MM1	Blue
ENSCHIG00000008817	MM1	Blue
ENSCHIG00000008831	MM1	Blue
ENSCHIG00000008832	MM1	Blue
ENSCHIG00000008849	MM1	Blue
ENSCHIG00000008856	MM1	Blue
ENSCHIG00000008858	MM1	Blue
ENSCHIG00000008860	MM1	Blue
ENSCHIG00000008866	MM1	Blue
ENSCHIG00000008875	MM1	Blue
ENSCHIG00000008884	MM1	Blue
ENSCHIG00000008885	MM1	Blue
ENSCHIG00000008901	MM1	Blue
ENSCHIG00000008907	MM1	Blue
ENSCHIG00000008919	MM1	Blue
ENSCHIG00000008930	MM1	Blue
ENSCHIG00000008939	MM1	Blue
ENSCHIG00000008954	MM1	Blue
ENSCHIG00000008966	MM1	Blue
ENSCHIG00000008968	MM1	Blue
ENSCHIG00000008977	MM1	Blue
ENSCHIG00000008978	MM1	Blue
ENSCHIG00000008983	MM1	Blue
ENSCHIG00000008987	MM1	Blue
ENSCHIG00000008995	MM1	Blue
ENSCHIG00000008997	MM1	Blue
ENSCHIG00000009010	MM1	Blue
ENSCHIG00000009026	MM1	Blue
ENSCHIG00000009034	MM1	Blue
ENSCHIG00000009039	MM1	Blue
ENSCHIG00000009050	MM1	Blue
ENSCHIG00000009054	MM1	Blue
ENSCHIG00000009060	MM1	Blue
ENSCHIG00000009061	MM1	Blue
ENSCHIG00000009065	MM1	Blue
ENSCHIG00000009068	MM1	Blue
ENSCHIG00000009070	MM1	Blue
ENSCHIG00000009074	MM1	Blue
ENSCHIG00000009088	MM1	Blue
ENSCHIG00000009098	MM1	Blue
ENSCHIG00000009100	MM1	Blue
ENSCHIG00000009109	MM1	Blue
ENSCHIG00000009124	MM1	Blue
ENSCHIG00000009132	MM1	Blue
ENSCHIG00000009151	MM1	Blue
ENSCHIG00000009159	MM1	Blue
ENSCHIG00000009168	MM1	Blue
ENSCHIG00000009169	MM1	Blue
ENSCHIG00000009182	MM1	Blue
ENSCHIG00000009183	MM1	Blue
ENSCHIG00000009184	MM1	Blue
ENSCHIG00000009187	MM1	Blue
ENSCHIG00000009190	MM1	Blue
ENSCHIG00000009196	MM1	Blue
ENSCHIG00000009217	MM1	Blue
ENSCHIG00000009219	MM1	Blue
ENSCHIG00000009222	MM1	Blue
ENSCHIG00000009248	MM1	Blue
ENSCHIG00000009262	MM1	Blue
ENSCHIG00000009267	MM1	Blue
ENSCHIG00000009300	MM1	Blue
ENSCHIG00000009304	MM1	Blue
ENSCHIG00000009308	MM1	Blue
ENSCHIG00000009309	MM1	Blue
ENSCHIG00000009315	MM1	Blue
ENSCHIG00000009318	MM1	Blue
ENSCHIG00000009323	MM1	Blue
ENSCHIG00000009328	MM1	Blue
ENSCHIG00000009351	MM1	Blue
ENSCHIG00000009352	MM1	Blue
ENSCHIG00000009363	MM1	Blue
ENSCHIG00000009365	MM1	Blue
ENSCHIG00000009371	MM1	Blue
ENSCHIG00000009373	MM1	Blue
ENSCHIG00000009385	MM1	Blue
ENSCHIG00000009392	MM1	Blue
ENSCHIG00000009395	MM1	Blue
ENSCHIG00000009411	MM1	Blue
ENSCHIG00000009413	MM1	Blue
ENSCHIG00000009416	MM1	Blue
ENSCHIG00000009421	MM1	Blue
ENSCHIG00000009431	MM1	Blue
ENSCHIG00000009433	MM1	Blue
ENSCHIG00000009441	MM1	Blue
ENSCHIG00000009445	MM1	Blue
ENSCHIG00000009460	MM1	Blue
ENSCHIG00000009469	MM1	Blue
ENSCHIG00000009486	MM1	Blue
ENSCHIG00000009487	MM1	Blue
ENSCHIG00000009490	MM1	Blue
ENSCHIG00000009496	MM1	Blue
ENSCHIG00000009513	MM1	Blue
ENSCHIG00000009538	MM1	Blue
ENSCHIG00000009543	MM1	Blue
ENSCHIG00000009550	MM1	Blue
ENSCHIG00000009551	MM1	Blue
ENSCHIG00000009552	MM1	Blue
ENSCHIG00000009560	MM1	Blue
ENSCHIG00000009568	MM1	Blue
ENSCHIG00000009579	MM1	Blue
ENSCHIG00000009593	MM1	Blue
ENSCHIG00000009596	MM1	Blue
ENSCHIG00000009602	MM1	Blue
ENSCHIG00000009605	MM1	Blue
ENSCHIG00000009608	MM1	Blue
ENSCHIG00000009615	MM1	Blue
ENSCHIG00000009616	MM1	Blue
ENSCHIG00000009618	MM1	Blue
ENSCHIG00000009627	MM1	Blue
ENSCHIG00000009637	MM1	Blue
ENSCHIG00000009651	MM1	Blue
ENSCHIG00000009658	MM1	Blue
ENSCHIG00000009666	MM1	Blue
ENSCHIG00000009674	MM1	Blue
ENSCHIG00000009678	MM1	Blue
ENSCHIG00000009689	MM1	Blue
ENSCHIG00000009698	MM1	Blue
ENSCHIG00000009710	MM1	Blue
ENSCHIG00000009718	MM1	Blue
ENSCHIG00000009719	MM1	Blue
ENSCHIG00000009739	MM1	Blue
ENSCHIG00000009753	MM1	Blue
ENSCHIG00000009768	MM1	Blue
ENSCHIG00000009772	MM1	Blue
ENSCHIG00000009785	MM1	Blue
ENSCHIG00000009786	MM1	Blue
ENSCHIG00000009795	MM1	Blue
ENSCHIG00000009800	MM1	Blue
ENSCHIG00000009803	MM1	Blue
ENSCHIG00000009805	MM1	Blue
ENSCHIG00000009811	MM1	Blue
ENSCHIG00000009825	MM1	Blue
ENSCHIG00000009838	MM1	Blue
ENSCHIG00000009840	MM1	Blue
ENSCHIG00000009843	MM1	Blue
ENSCHIG00000009845	MM1	Blue
ENSCHIG00000009849	MM1	Blue
ENSCHIG00000009856	MM1	Blue
ENSCHIG00000009858	MM1	Blue
ENSCHIG00000009872	MM1	Blue
ENSCHIG00000009875	MM1	Blue
ENSCHIG00000009888	MM1	Blue
ENSCHIG00000009890	MM1	Blue
ENSCHIG00000009901	MM1	Blue
ENSCHIG00000009919	MM1	Blue
ENSCHIG00000009921	MM1	Blue
ENSCHIG00000009923	MM1	Blue
ENSCHIG00000009925	MM1	Blue
ENSCHIG00000009927	MM1	Blue
ENSCHIG00000009931	MM1	Blue
ENSCHIG00000009935	MM1	Blue
ENSCHIG00000009936	MM1	Blue
ENSCHIG00000009943	MM1	Blue
ENSCHIG00000009946	MM1	Blue
ENSCHIG00000009956	MM1	Blue
ENSCHIG00000009973	MM1	Blue
ENSCHIG00000009977	MM1	Blue
ENSCHIG00000009989	MM1	Blue
ENSCHIG00000009990	MM1	Blue
ENSCHIG00000010007	MM1	Blue
ENSCHIG00000010008	MM1	Blue
ENSCHIG00000010028	MM1	Blue
ENSCHIG00000010031	MM1	Blue
ENSCHIG00000010041	MM1	Blue
ENSCHIG00000010042	MM1	Blue
ENSCHIG00000010048	MM1	Blue
ENSCHIG00000010049	MM1	Blue
ENSCHIG00000010053	MM1	Blue
ENSCHIG00000010057	MM1	Blue
ENSCHIG00000010060	MM1	Blue
ENSCHIG00000010064	MM1	Blue
ENSCHIG00000010069	MM1	Blue
ENSCHIG00000010076	MM1	Blue
ENSCHIG00000010090	MM1	Blue
ENSCHIG00000010091	MM1	Blue
ENSCHIG00000010109	MM1	Blue
ENSCHIG00000010114	MM1	Blue
ENSCHIG00000010116	MM1	Blue
ENSCHIG00000010122	MM1	Blue
ENSCHIG00000010125	MM1	Blue
ENSCHIG00000010128	MM1	Blue
ENSCHIG00000010137	MM1	Blue
ENSCHIG00000010197	MM1	Blue
ENSCHIG00000010198	MM1	Blue
ENSCHIG00000010199	MM1	Blue
ENSCHIG00000010203	MM1	Blue
ENSCHIG00000010229	MM1	Blue
ENSCHIG00000010230	MM1	Blue
ENSCHIG00000010248	MM1	Blue
ENSCHIG00000010255	MM1	Blue
ENSCHIG00000010277	MM1	Blue
ENSCHIG00000010284	MM1	Blue
ENSCHIG00000010298	MM1	Blue
ENSCHIG00000010304	MM1	Blue
ENSCHIG00000010313	MM1	Blue
ENSCHIG00000010316	MM1	Blue
ENSCHIG00000010320	MM1	Blue
ENSCHIG00000010321	MM1	Blue
ENSCHIG00000010325	MM1	Blue
ENSCHIG00000010328	MM1	Blue
ENSCHIG00000010330	MM1	Blue
ENSCHIG00000010339	MM1	Blue
ENSCHIG00000010341	MM1	Blue
ENSCHIG00000010362	MM1	Blue
ENSCHIG00000010366	MM1	Blue
ENSCHIG00000010375	MM1	Blue
ENSCHIG00000010380	MM1	Blue
ENSCHIG00000010398	MM1	Blue
ENSCHIG00000010405	MM1	Blue
ENSCHIG00000010408	MM1	Blue
ENSCHIG00000010417	MM1	Blue
ENSCHIG00000010421	MM1	Blue
ENSCHIG00000010452	MM1	Blue
ENSCHIG00000010459	MM1	Blue
ENSCHIG00000010465	MM1	Blue
ENSCHIG00000010480	MM1	Blue
ENSCHIG00000010494	MM1	Blue
ENSCHIG00000010495	MM1	Blue
ENSCHIG00000010497	MM1	Blue
ENSCHIG00000010511	MM1	Blue
ENSCHIG00000010515	MM1	Blue
ENSCHIG00000010518	MM1	Blue
ENSCHIG00000010521	MM1	Blue
ENSCHIG00000010522	MM1	Blue
ENSCHIG00000010529	MM1	Blue
ENSCHIG00000010533	MM1	Blue
ENSCHIG00000010541	MM1	Blue
ENSCHIG00000010549	MM1	Blue
ENSCHIG00000010554	MM1	Blue
ENSCHIG00000010563	MM1	Blue
ENSCHIG00000010575	MM1	Blue
ENSCHIG00000010583	MM1	Blue
ENSCHIG00000010584	MM1	Blue
ENSCHIG00000010586	MM1	Blue
ENSCHIG00000010598	MM1	Blue
ENSCHIG00000010599	MM1	Blue
ENSCHIG00000010612	MM1	Blue
ENSCHIG00000010616	MM1	Blue
ENSCHIG00000010618	MM1	Blue
ENSCHIG00000010648	MM1	Blue
ENSCHIG00000010652	MM1	Blue
ENSCHIG00000010657	MM1	Blue
ENSCHIG00000010679	MM1	Blue
ENSCHIG00000010685	MM1	Blue
ENSCHIG00000010688	MM1	Blue
ENSCHIG00000010705	MM1	Blue
ENSCHIG00000010706	MM1	Blue
ENSCHIG00000010712	MM1	Blue
ENSCHIG00000010721	MM1	Blue
ENSCHIG00000010741	MM1	Blue
ENSCHIG00000010742	MM1	Blue
ENSCHIG00000010745	MM1	Blue
ENSCHIG00000010777	MM1	Blue
ENSCHIG00000010806	MM1	Blue
ENSCHIG00000010807	MM1	Blue
ENSCHIG00000010812	MM1	Blue
ENSCHIG00000010818	MM1	Blue
ENSCHIG00000010832	MM1	Blue
ENSCHIG00000010834	MM1	Blue
ENSCHIG00000010837	MM1	Blue
ENSCHIG00000010839	MM1	Blue
ENSCHIG00000010846	MM1	Blue
ENSCHIG00000010863	MM1	Blue
ENSCHIG00000010871	MM1	Blue
ENSCHIG00000010883	MM1	Blue
ENSCHIG00000010884	MM1	Blue
ENSCHIG00000010892	MM1	Blue
ENSCHIG00000010912	MM1	Blue
ENSCHIG00000010933	MM1	Blue
ENSCHIG00000010937	MM1	Blue
ENSCHIG00000010938	MM1	Blue
ENSCHIG00000010941	MM1	Blue
ENSCHIG00000010958	MM1	Blue
ENSCHIG00000010960	MM1	Blue
ENSCHIG00000010963	MM1	Blue
ENSCHIG00000010964	MM1	Blue
ENSCHIG00000010980	MM1	Blue
ENSCHIG00000010981	MM1	Blue
ENSCHIG00000010991	MM1	Blue
ENSCHIG00000011003	MM1	Blue
ENSCHIG00000011007	MM1	Blue
ENSCHIG00000011008	MM1	Blue
ENSCHIG00000011016	MM1	Blue
ENSCHIG00000011018	MM1	Blue
ENSCHIG00000011019	MM1	Blue
ENSCHIG00000011031	MM1	Blue
ENSCHIG00000011033	MM1	Blue
ENSCHIG00000011037	MM1	Blue
ENSCHIG00000011043	MM1	Blue
ENSCHIG00000011051	MM1	Blue
ENSCHIG00000011052	MM1	Blue
ENSCHIG00000011056	MM1	Blue
ENSCHIG00000011061	MM1	Blue
ENSCHIG00000011077	MM1	Blue
ENSCHIG00000011078	MM1	Blue
ENSCHIG00000011094	MM1	Blue
ENSCHIG00000011104	MM1	Blue
ENSCHIG00000011107	MM1	Blue
ENSCHIG00000011109	MM1	Blue
ENSCHIG00000011111	MM1	Blue
ENSCHIG00000011116	MM1	Blue
ENSCHIG00000011120	MM1	Blue
ENSCHIG00000011142	MM1	Blue
ENSCHIG00000011152	MM1	Blue
ENSCHIG00000011158	MM1	Blue
ENSCHIG00000011188	MM1	Blue
ENSCHIG00000011209	MM1	Blue
ENSCHIG00000011214	MM1	Blue
ENSCHIG00000011215	MM1	Blue
ENSCHIG00000011217	MM1	Blue
ENSCHIG00000011219	MM1	Blue
ENSCHIG00000011227	MM1	Blue
ENSCHIG00000011228	MM1	Blue
ENSCHIG00000011229	MM1	Blue
ENSCHIG00000011230	MM1	Blue
ENSCHIG00000011234	MM1	Blue
ENSCHIG00000011244	MM1	Blue
ENSCHIG00000011249	MM1	Blue
ENSCHIG00000011252	MM1	Blue
ENSCHIG00000011255	MM1	Blue
ENSCHIG00000011258	MM1	Blue
ENSCHIG00000011267	MM1	Blue
ENSCHIG00000011271	MM1	Blue
ENSCHIG00000011276	MM1	Blue
ENSCHIG00000011283	MM1	Blue
ENSCHIG00000011288	MM1	Blue
ENSCHIG00000011296	MM1	Blue
ENSCHIG00000011312	MM1	Blue
ENSCHIG00000011318	MM1	Blue
ENSCHIG00000011324	MM1	Blue
ENSCHIG00000011326	MM1	Blue
ENSCHIG00000011328	MM1	Blue
ENSCHIG00000011345	MM1	Blue
ENSCHIG00000011350	MM1	Blue
ENSCHIG00000011353	MM1	Blue
ENSCHIG00000011356	MM1	Blue
ENSCHIG00000011362	MM1	Blue
ENSCHIG00000011365	MM1	Blue
ENSCHIG00000011366	MM1	Blue
ENSCHIG00000011393	MM1	Blue
ENSCHIG00000011413	MM1	Blue
ENSCHIG00000011420	MM1	Blue
ENSCHIG00000011426	MM1	Blue
ENSCHIG00000011430	MM1	Blue
ENSCHIG00000011432	MM1	Blue
ENSCHIG00000011436	MM1	Blue
ENSCHIG00000011452	MM1	Blue
ENSCHIG00000011453	MM1	Blue
ENSCHIG00000011458	MM1	Blue
ENSCHIG00000011472	MM1	Blue
ENSCHIG00000011477	MM1	Blue
ENSCHIG00000011484	MM1	Blue
ENSCHIG00000011485	MM1	Blue
ENSCHIG00000011493	MM1	Blue
ENSCHIG00000011507	MM1	Blue
ENSCHIG00000011516	MM1	Blue
ENSCHIG00000011541	MM1	Blue
ENSCHIG00000011544	MM1	Blue
ENSCHIG00000011560	MM1	Blue
ENSCHIG00000011570	MM1	Blue
ENSCHIG00000011575	MM1	Blue
ENSCHIG00000011593	MM1	Blue
ENSCHIG00000011601	MM1	Blue
ENSCHIG00000011612	MM1	Blue
ENSCHIG00000011616	MM1	Blue
ENSCHIG00000011622	MM1	Blue
ENSCHIG00000011629	MM1	Blue
ENSCHIG00000011630	MM1	Blue
ENSCHIG00000011647	MM1	Blue
ENSCHIG00000011649	MM1	Blue
ENSCHIG00000011650	MM1	Blue
ENSCHIG00000011665	MM1	Blue
ENSCHIG00000011668	MM1	Blue
ENSCHIG00000011673	MM1	Blue
ENSCHIG00000011674	MM1	Blue
ENSCHIG00000011675	MM1	Blue
ENSCHIG00000011691	MM1	Blue
ENSCHIG00000011700	MM1	Blue
ENSCHIG00000011703	MM1	Blue
ENSCHIG00000011710	MM1	Blue
ENSCHIG00000011715	MM1	Blue
ENSCHIG00000011716	MM1	Blue
ENSCHIG00000011721	MM1	Blue
ENSCHIG00000011723	MM1	Blue
ENSCHIG00000011728	MM1	Blue
ENSCHIG00000011743	MM1	Blue
ENSCHIG00000011746	MM1	Blue
ENSCHIG00000011747	MM1	Blue
ENSCHIG00000011750	MM1	Blue
ENSCHIG00000011761	MM1	Blue
ENSCHIG00000011762	MM1	Blue
ENSCHIG00000011774	MM1	Blue
ENSCHIG00000011779	MM1	Blue
ENSCHIG00000011789	MM1	Blue
ENSCHIG00000011798	MM1	Blue
ENSCHIG00000011814	MM1	Blue
ENSCHIG00000011818	MM1	Blue
ENSCHIG00000011825	MM1	Blue
ENSCHIG00000011829	MM1	Blue
ENSCHIG00000011835	MM1	Blue
ENSCHIG00000011836	MM1	Blue
ENSCHIG00000011839	MM1	Blue
ENSCHIG00000011843	MM1	Blue
ENSCHIG00000011856	MM1	Blue
ENSCHIG00000011859	MM1	Blue
ENSCHIG00000011863	MM1	Blue
ENSCHIG00000011868	MM1	Blue
ENSCHIG00000011874	MM1	Blue
ENSCHIG00000011885	MM1	Blue
ENSCHIG00000011892	MM1	Blue
ENSCHIG00000011895	MM1	Blue
ENSCHIG00000011899	MM1	Blue
ENSCHIG00000011900	MM1	Blue
ENSCHIG00000011905	MM1	Blue
ENSCHIG00000011931	MM1	Blue
ENSCHIG00000011935	MM1	Blue
ENSCHIG00000011939	MM1	Blue
ENSCHIG00000011944	MM1	Blue
ENSCHIG00000011946	MM1	Blue
ENSCHIG00000011959	MM1	Blue
ENSCHIG00000011966	MM1	Blue
ENSCHIG00000011967	MM1	Blue
ENSCHIG00000011974	MM1	Blue
ENSCHIG00000011982	MM1	Blue
ENSCHIG00000011986	MM1	Blue
ENSCHIG00000011987	MM1	Blue
ENSCHIG00000011993	MM1	Blue
ENSCHIG00000012005	MM1	Blue
ENSCHIG00000012011	MM1	Blue
ENSCHIG00000012017	MM1	Blue
ENSCHIG00000012023	MM1	Blue
ENSCHIG00000012035	MM1	Blue
ENSCHIG00000012043	MM1	Blue
ENSCHIG00000012048	MM1	Blue
ENSCHIG00000012052	MM1	Blue
ENSCHIG00000012053	MM1	Blue
ENSCHIG00000012059	MM1	Blue
ENSCHIG00000012079	MM1	Blue
ENSCHIG00000012088	MM1	Blue
ENSCHIG00000012093	MM1	Blue
ENSCHIG00000012100	MM1	Blue
ENSCHIG00000012102	MM1	Blue
ENSCHIG00000012104	MM1	Blue
ENSCHIG00000012119	MM1	Blue
ENSCHIG00000012130	MM1	Blue
ENSCHIG00000012131	MM1	Blue
ENSCHIG00000012133	MM1	Blue
ENSCHIG00000012135	MM1	Blue
ENSCHIG00000012142	MM1	Blue
ENSCHIG00000012153	MM1	Blue
ENSCHIG00000012159	MM1	Blue
ENSCHIG00000012168	MM1	Blue
ENSCHIG00000012173	MM1	Blue
ENSCHIG00000012177	MM1	Blue
ENSCHIG00000012189	MM1	Blue
ENSCHIG00000012195	MM1	Blue
ENSCHIG00000012202	MM1	Blue
ENSCHIG00000012214	MM1	Blue
ENSCHIG00000012215	MM1	Blue
ENSCHIG00000012225	MM1	Blue
ENSCHIG00000012226	MM1	Blue
ENSCHIG00000012237	MM1	Blue
ENSCHIG00000012240	MM1	Blue
ENSCHIG00000012243	MM1	Blue
ENSCHIG00000012249	MM1	Blue
ENSCHIG00000012256	MM1	Blue
ENSCHIG00000012267	MM1	Blue
ENSCHIG00000012286	MM1	Blue
ENSCHIG00000012298	MM1	Blue
ENSCHIG00000012300	MM1	Blue
ENSCHIG00000012312	MM1	Blue
ENSCHIG00000012314	MM1	Blue
ENSCHIG00000012316	MM1	Blue
ENSCHIG00000012329	MM1	Blue
ENSCHIG00000012331	MM1	Blue
ENSCHIG00000012337	MM1	Blue
ENSCHIG00000012340	MM1	Blue
ENSCHIG00000012343	MM1	Blue
ENSCHIG00000012373	MM1	Blue
ENSCHIG00000012374	MM1	Blue
ENSCHIG00000012385	MM1	Blue
ENSCHIG00000012386	MM1	Blue
ENSCHIG00000012388	MM1	Blue
ENSCHIG00000012389	MM1	Blue
ENSCHIG00000012396	MM1	Blue
ENSCHIG00000012397	MM1	Blue
ENSCHIG00000012398	MM1	Blue
ENSCHIG00000012410	MM1	Blue
ENSCHIG00000012415	MM1	Blue
ENSCHIG00000012433	MM1	Blue
ENSCHIG00000012435	MM1	Blue
ENSCHIG00000012439	MM1	Blue
ENSCHIG00000012440	MM1	Blue
ENSCHIG00000012441	MM1	Blue
ENSCHIG00000012449	MM1	Blue
ENSCHIG00000012453	MM1	Blue
ENSCHIG00000012461	MM1	Blue
ENSCHIG00000012470	MM1	Blue
ENSCHIG00000012473	MM1	Blue
ENSCHIG00000012484	MM1	Blue
ENSCHIG00000012498	MM1	Blue
ENSCHIG00000012499	MM1	Blue
ENSCHIG00000012503	MM1	Blue
ENSCHIG00000012506	MM1	Blue
ENSCHIG00000012512	MM1	Blue
ENSCHIG00000012543	MM1	Blue
ENSCHIG00000012544	MM1	Blue
ENSCHIG00000012552	MM1	Blue
ENSCHIG00000012553	MM1	Blue
ENSCHIG00000012564	MM1	Blue
ENSCHIG00000012583	MM1	Blue
ENSCHIG00000012586	MM1	Blue
ENSCHIG00000012587	MM1	Blue
ENSCHIG00000012596	MM1	Blue
ENSCHIG00000012603	MM1	Blue
ENSCHIG00000012605	MM1	Blue
ENSCHIG00000012612	MM1	Blue
ENSCHIG00000012614	MM1	Blue
ENSCHIG00000012616	MM1	Blue
ENSCHIG00000012620	MM1	Blue
ENSCHIG00000012626	MM1	Blue
ENSCHIG00000012647	MM1	Blue
ENSCHIG00000012654	MM1	Blue
ENSCHIG00000012656	MM1	Blue
ENSCHIG00000012659	MM1	Blue
ENSCHIG00000012665	MM1	Blue
ENSCHIG00000012666	MM1	Blue
ENSCHIG00000012676	MM1	Blue
ENSCHIG00000012685	MM1	Blue
ENSCHIG00000012692	MM1	Blue
ENSCHIG00000012700	MM1	Blue
ENSCHIG00000012701	MM1	Blue
ENSCHIG00000012703	MM1	Blue
ENSCHIG00000012704	MM1	Blue
ENSCHIG00000012717	MM1	Blue
ENSCHIG00000012721	MM1	Blue
ENSCHIG00000012727	MM1	Blue
ENSCHIG00000012728	MM1	Blue
ENSCHIG00000012734	MM1	Blue
ENSCHIG00000012741	MM1	Blue
ENSCHIG00000012746	MM1	Blue
ENSCHIG00000012750	MM1	Blue
ENSCHIG00000012755	MM1	Blue
ENSCHIG00000012756	MM1	Blue
ENSCHIG00000012766	MM1	Blue
ENSCHIG00000012768	MM1	Blue
ENSCHIG00000012771	MM1	Blue
ENSCHIG00000012776	MM1	Blue
ENSCHIG00000012781	MM1	Blue
ENSCHIG00000012783	MM1	Blue
ENSCHIG00000012795	MM1	Blue
ENSCHIG00000012798	MM1	Blue
ENSCHIG00000012808	MM1	Blue
ENSCHIG00000012811	MM1	Blue
ENSCHIG00000012831	MM1	Blue
ENSCHIG00000012839	MM1	Blue
ENSCHIG00000012841	MM1	Blue
ENSCHIG00000012848	MM1	Blue
ENSCHIG00000012852	MM1	Blue
ENSCHIG00000012857	MM1	Blue
ENSCHIG00000012861	MM1	Blue
ENSCHIG00000012865	MM1	Blue
ENSCHIG00000012874	MM1	Blue
ENSCHIG00000012881	MM1	Blue
ENSCHIG00000012887	MM1	Blue
ENSCHIG00000012896	MM1	Blue
ENSCHIG00000012903	MM1	Blue
ENSCHIG00000012906	MM1	Blue
ENSCHIG00000012911	MM1	Blue
ENSCHIG00000012918	MM1	Blue
ENSCHIG00000012924	MM1	Blue
ENSCHIG00000012925	MM1	Blue
ENSCHIG00000012929	MM1	Blue
ENSCHIG00000012932	MM1	Blue
ENSCHIG00000012937	MM1	Blue
ENSCHIG00000012938	MM1	Blue
ENSCHIG00000012940	MM1	Blue
ENSCHIG00000012950	MM1	Blue
ENSCHIG00000012964	MM1	Blue
ENSCHIG00000012969	MM1	Blue
ENSCHIG00000012974	MM1	Blue
ENSCHIG00000012991	MM1	Blue
ENSCHIG00000013005	MM1	Blue
ENSCHIG00000013011	MM1	Blue
ENSCHIG00000013021	MM1	Blue
ENSCHIG00000013022	MM1	Blue
ENSCHIG00000013027	MM1	Blue
ENSCHIG00000013042	MM1	Blue
ENSCHIG00000013061	MM1	Blue
ENSCHIG00000013064	MM1	Blue
ENSCHIG00000013074	MM1	Blue
ENSCHIG00000013077	MM1	Blue
ENSCHIG00000013079	MM1	Blue
ENSCHIG00000013082	MM1	Blue
ENSCHIG00000013085	MM1	Blue
ENSCHIG00000013090	MM1	Blue
ENSCHIG00000013097	MM1	Blue
ENSCHIG00000013104	MM1	Blue
ENSCHIG00000013105	MM1	Blue
ENSCHIG00000013108	MM1	Blue
ENSCHIG00000013112	MM1	Blue
ENSCHIG00000013114	MM1	Blue
ENSCHIG00000013117	MM1	Blue
ENSCHIG00000013127	MM1	Blue
ENSCHIG00000013128	MM1	Blue
ENSCHIG00000013138	MM1	Blue
ENSCHIG00000013139	MM1	Blue
ENSCHIG00000013141	MM1	Blue
ENSCHIG00000013142	MM1	Blue
ENSCHIG00000013145	MM1	Blue
ENSCHIG00000013149	MM1	Blue
ENSCHIG00000013155	MM1	Blue
ENSCHIG00000013166	MM1	Blue
ENSCHIG00000013170	MM1	Blue
ENSCHIG00000013185	MM1	Blue
ENSCHIG00000013192	MM1	Blue
ENSCHIG00000013193	MM1	Blue
ENSCHIG00000013202	MM1	Blue
ENSCHIG00000013203	MM1	Blue
ENSCHIG00000013210	MM1	Blue
ENSCHIG00000013219	MM1	Blue
ENSCHIG00000013221	MM1	Blue
ENSCHIG00000013229	MM1	Blue
ENSCHIG00000013234	MM1	Blue
ENSCHIG00000013237	MM1	Blue
ENSCHIG00000013238	MM1	Blue
ENSCHIG00000013240	MM1	Blue
ENSCHIG00000013246	MM1	Blue
ENSCHIG00000013249	MM1	Blue
ENSCHIG00000013253	MM1	Blue
ENSCHIG00000013264	MM1	Blue
ENSCHIG00000013267	MM1	Blue
ENSCHIG00000013283	MM1	Blue
ENSCHIG00000013287	MM1	Blue
ENSCHIG00000013288	MM1	Blue
ENSCHIG00000013290	MM1	Blue
ENSCHIG00000013296	MM1	Blue
ENSCHIG00000013299	MM1	Blue
ENSCHIG00000013310	MM1	Blue
ENSCHIG00000013314	MM1	Blue
ENSCHIG00000013317	MM1	Blue
ENSCHIG00000013326	MM1	Blue
ENSCHIG00000013341	MM1	Blue
ENSCHIG00000013342	MM1	Blue
ENSCHIG00000013352	MM1	Blue
ENSCHIG00000013354	MM1	Blue
ENSCHIG00000013356	MM1	Blue
ENSCHIG00000013359	MM1	Blue
ENSCHIG00000013360	MM1	Blue
ENSCHIG00000013367	MM1	Blue
ENSCHIG00000013373	MM1	Blue
ENSCHIG00000013374	MM1	Blue
ENSCHIG00000013376	MM1	Blue
ENSCHIG00000013382	MM1	Blue
ENSCHIG00000013384	MM1	Blue
ENSCHIG00000013400	MM1	Blue
ENSCHIG00000013402	MM1	Blue
ENSCHIG00000013406	MM1	Blue
ENSCHIG00000013411	MM1	Blue
ENSCHIG00000013414	MM1	Blue
ENSCHIG00000013435	MM1	Blue
ENSCHIG00000013438	MM1	Blue
ENSCHIG00000013449	MM1	Blue
ENSCHIG00000013453	MM1	Blue
ENSCHIG00000013464	MM1	Blue
ENSCHIG00000013471	MM1	Blue
ENSCHIG00000013476	MM1	Blue
ENSCHIG00000013478	MM1	Blue
ENSCHIG00000013482	MM1	Blue
ENSCHIG00000013488	MM1	Blue
ENSCHIG00000013490	MM1	Blue
ENSCHIG00000013491	MM1	Blue
ENSCHIG00000013500	MM1	Blue
ENSCHIG00000013508	MM1	Blue
ENSCHIG00000013509	MM1	Blue
ENSCHIG00000013512	MM1	Blue
ENSCHIG00000013522	MM1	Blue
ENSCHIG00000013523	MM1	Blue
ENSCHIG00000013532	MM1	Blue
ENSCHIG00000013542	MM1	Blue
ENSCHIG00000013550	MM1	Blue
ENSCHIG00000013551	MM1	Blue
ENSCHIG00000013556	MM1	Blue
ENSCHIG00000013558	MM1	Blue
ENSCHIG00000013569	MM1	Blue
ENSCHIG00000013570	MM1	Blue
ENSCHIG00000013573	MM1	Blue
ENSCHIG00000013581	MM1	Blue
ENSCHIG00000013587	MM1	Blue
ENSCHIG00000013608	MM1	Blue
ENSCHIG00000013612	MM1	Blue
ENSCHIG00000013624	MM1	Blue
ENSCHIG00000013625	MM1	Blue
ENSCHIG00000013629	MM1	Blue
ENSCHIG00000013632	MM1	Blue
ENSCHIG00000013655	MM1	Blue
ENSCHIG00000013661	MM1	Blue
ENSCHIG00000013666	MM1	Blue
ENSCHIG00000013668	MM1	Blue
ENSCHIG00000013671	MM1	Blue
ENSCHIG00000013673	MM1	Blue
ENSCHIG00000013675	MM1	Blue
ENSCHIG00000013678	MM1	Blue
ENSCHIG00000013680	MM1	Blue
ENSCHIG00000013707	MM1	Blue
ENSCHIG00000013708	MM1	Blue
ENSCHIG00000013710	MM1	Blue
ENSCHIG00000013712	MM1	Blue
ENSCHIG00000013720	MM1	Blue
ENSCHIG00000013721	MM1	Blue
ENSCHIG00000013729	MM1	Blue
ENSCHIG00000013743	MM1	Blue
ENSCHIG00000013744	MM1	Blue
ENSCHIG00000013751	MM1	Blue
ENSCHIG00000013753	MM1	Blue
ENSCHIG00000013757	MM1	Blue
ENSCHIG00000013762	MM1	Blue
ENSCHIG00000013766	MM1	Blue
ENSCHIG00000013768	MM1	Blue
ENSCHIG00000013773	MM1	Blue
ENSCHIG00000013775	MM1	Blue
ENSCHIG00000013783	MM1	Blue
ENSCHIG00000013784	MM1	Blue
ENSCHIG00000013790	MM1	Blue
ENSCHIG00000013799	MM1	Blue
ENSCHIG00000013809	MM1	Blue
ENSCHIG00000013813	MM1	Blue
ENSCHIG00000013815	MM1	Blue
ENSCHIG00000013817	MM1	Blue
ENSCHIG00000013830	MM1	Blue
ENSCHIG00000013835	MM1	Blue
ENSCHIG00000013841	MM1	Blue
ENSCHIG00000013843	MM1	Blue
ENSCHIG00000013853	MM1	Blue
ENSCHIG00000013854	MM1	Blue
ENSCHIG00000013857	MM1	Blue
ENSCHIG00000013859	MM1	Blue
ENSCHIG00000013867	MM1	Blue
ENSCHIG00000013872	MM1	Blue
ENSCHIG00000013883	MM1	Blue
ENSCHIG00000013891	MM1	Blue
ENSCHIG00000013902	MM1	Blue
ENSCHIG00000013905	MM1	Blue
ENSCHIG00000013907	MM1	Blue
ENSCHIG00000013911	MM1	Blue
ENSCHIG00000013912	MM1	Blue
ENSCHIG00000013921	MM1	Blue
ENSCHIG00000013926	MM1	Blue
ENSCHIG00000013935	MM1	Blue
ENSCHIG00000013941	MM1	Blue
ENSCHIG00000013954	MM1	Blue
ENSCHIG00000013960	MM1	Blue
ENSCHIG00000013963	MM1	Blue
ENSCHIG00000013966	MM1	Blue
ENSCHIG00000013983	MM1	Blue
ENSCHIG00000013990	MM1	Blue
ENSCHIG00000013991	MM1	Blue
ENSCHIG00000014000	MM1	Blue
ENSCHIG00000014001	MM1	Blue
ENSCHIG00000014004	MM1	Blue
ENSCHIG00000014010	MM1	Blue
ENSCHIG00000014015	MM1	Blue
ENSCHIG00000014033	MM1	Blue
ENSCHIG00000014042	MM1	Blue
ENSCHIG00000014043	MM1	Blue
ENSCHIG00000014046	MM1	Blue
ENSCHIG00000014053	MM1	Blue
ENSCHIG00000014062	MM1	Blue
ENSCHIG00000014063	MM1	Blue
ENSCHIG00000014064	MM1	Blue
ENSCHIG00000014065	MM1	Blue
ENSCHIG00000014078	MM1	Blue
ENSCHIG00000014085	MM1	Blue
ENSCHIG00000014086	MM1	Blue
ENSCHIG00000014094	MM1	Blue
ENSCHIG00000014099	MM1	Blue
ENSCHIG00000014104	MM1	Blue
ENSCHIG00000014107	MM1	Blue
ENSCHIG00000014111	MM1	Blue
ENSCHIG00000014120	MM1	Blue
ENSCHIG00000014123	MM1	Blue
ENSCHIG00000014126	MM1	Blue
ENSCHIG00000014127	MM1	Blue
ENSCHIG00000014142	MM1	Blue
ENSCHIG00000014166	MM1	Blue
ENSCHIG00000014172	MM1	Blue
ENSCHIG00000014175	MM1	Blue
ENSCHIG00000014204	MM1	Blue
ENSCHIG00000014215	MM1	Blue
ENSCHIG00000014219	MM1	Blue
ENSCHIG00000014223	MM1	Blue
ENSCHIG00000014229	MM1	Blue
ENSCHIG00000014238	MM1	Blue
ENSCHIG00000014244	MM1	Blue
ENSCHIG00000014256	MM1	Blue
ENSCHIG00000014261	MM1	Blue
ENSCHIG00000014267	MM1	Blue
ENSCHIG00000014270	MM1	Blue
ENSCHIG00000014271	MM1	Blue
ENSCHIG00000014286	MM1	Blue
ENSCHIG00000014289	MM1	Blue
ENSCHIG00000014293	MM1	Blue
ENSCHIG00000014297	MM1	Blue
ENSCHIG00000014308	MM1	Blue
ENSCHIG00000014321	MM1	Blue
ENSCHIG00000014327	MM1	Blue
ENSCHIG00000014329	MM1	Blue
ENSCHIG00000014332	MM1	Blue
ENSCHIG00000014335	MM1	Blue
ENSCHIG00000014339	MM1	Blue
ENSCHIG00000014342	MM1	Blue
ENSCHIG00000014347	MM1	Blue
ENSCHIG00000014355	MM1	Blue
ENSCHIG00000014356	MM1	Blue
ENSCHIG00000014360	MM1	Blue
ENSCHIG00000014364	MM1	Blue
ENSCHIG00000014365	MM1	Blue
ENSCHIG00000014374	MM1	Blue
ENSCHIG00000014389	MM1	Blue
ENSCHIG00000014405	MM1	Blue
ENSCHIG00000014409	MM1	Blue
ENSCHIG00000014410	MM1	Blue
ENSCHIG00000014414	MM1	Blue
ENSCHIG00000014416	MM1	Blue
ENSCHIG00000014419	MM1	Blue
ENSCHIG00000014423	MM1	Blue
ENSCHIG00000014424	MM1	Blue
ENSCHIG00000014429	MM1	Blue
ENSCHIG00000014437	MM1	Blue
ENSCHIG00000014460	MM1	Blue
ENSCHIG00000014462	MM1	Blue
ENSCHIG00000014463	MM1	Blue
ENSCHIG00000014464	MM1	Blue
ENSCHIG00000014465	MM1	Blue
ENSCHIG00000014475	MM1	Blue
ENSCHIG00000014495	MM1	Blue
ENSCHIG00000014498	MM1	Blue
ENSCHIG00000014504	MM1	Blue
ENSCHIG00000014506	MM1	Blue
ENSCHIG00000014510	MM1	Blue
ENSCHIG00000014513	MM1	Blue
ENSCHIG00000014514	MM1	Blue
ENSCHIG00000014515	MM1	Blue
ENSCHIG00000014527	MM1	Blue
ENSCHIG00000014534	MM1	Blue
ENSCHIG00000014553	MM1	Blue
ENSCHIG00000014557	MM1	Blue
ENSCHIG00000014559	MM1	Blue
ENSCHIG00000014563	MM1	Blue
ENSCHIG00000014567	MM1	Blue
ENSCHIG00000014569	MM1	Blue
ENSCHIG00000014573	MM1	Blue
ENSCHIG00000014583	MM1	Blue
ENSCHIG00000014596	MM1	Blue
ENSCHIG00000014598	MM1	Blue
ENSCHIG00000014611	MM1	Blue
ENSCHIG00000014622	MM1	Blue
ENSCHIG00000014625	MM1	Blue
ENSCHIG00000014629	MM1	Blue
ENSCHIG00000014635	MM1	Blue
ENSCHIG00000014637	MM1	Blue
ENSCHIG00000014640	MM1	Blue
ENSCHIG00000014646	MM1	Blue
ENSCHIG00000014647	MM1	Blue
ENSCHIG00000014648	MM1	Blue
ENSCHIG00000014654	MM1	Blue
ENSCHIG00000014660	MM1	Blue
ENSCHIG00000014664	MM1	Blue
ENSCHIG00000014665	MM1	Blue
ENSCHIG00000014666	MM1	Blue
ENSCHIG00000014676	MM1	Blue
ENSCHIG00000014678	MM1	Blue
ENSCHIG00000014681	MM1	Blue
ENSCHIG00000014683	MM1	Blue
ENSCHIG00000014685	MM1	Blue
ENSCHIG00000014714	MM1	Blue
ENSCHIG00000014723	MM1	Blue
ENSCHIG00000014725	MM1	Blue
ENSCHIG00000014730	MM1	Blue
ENSCHIG00000014732	MM1	Blue
ENSCHIG00000014733	MM1	Blue
ENSCHIG00000014739	MM1	Blue
ENSCHIG00000014740	MM1	Blue
ENSCHIG00000014752	MM1	Blue
ENSCHIG00000014759	MM1	Blue
ENSCHIG00000014761	MM1	Blue
ENSCHIG00000014777	MM1	Blue
ENSCHIG00000014786	MM1	Blue
ENSCHIG00000014787	MM1	Blue
ENSCHIG00000014795	MM1	Blue
ENSCHIG00000014800	MM1	Blue
ENSCHIG00000014804	MM1	Blue
ENSCHIG00000014807	MM1	Blue
ENSCHIG00000014808	MM1	Blue
ENSCHIG00000014809	MM1	Blue
ENSCHIG00000014815	MM1	Blue
ENSCHIG00000014822	MM1	Blue
ENSCHIG00000014824	MM1	Blue
ENSCHIG00000014826	MM1	Blue
ENSCHIG00000014828	MM1	Blue
ENSCHIG00000014840	MM1	Blue
ENSCHIG00000014843	MM1	Blue
ENSCHIG00000014846	MM1	Blue
ENSCHIG00000014852	MM1	Blue
ENSCHIG00000014858	MM1	Blue
ENSCHIG00000014870	MM1	Blue
ENSCHIG00000014872	MM1	Blue
ENSCHIG00000014873	MM1	Blue
ENSCHIG00000014877	MM1	Blue
ENSCHIG00000014885	MM1	Blue
ENSCHIG00000014899	MM1	Blue
ENSCHIG00000014902	MM1	Blue
ENSCHIG00000014905	MM1	Blue
ENSCHIG00000014918	MM1	Blue
ENSCHIG00000014929	MM1	Blue
ENSCHIG00000014942	MM1	Blue
ENSCHIG00000014943	MM1	Blue
ENSCHIG00000014965	MM1	Blue
ENSCHIG00000014973	MM1	Blue
ENSCHIG00000014975	MM1	Blue
ENSCHIG00000014976	MM1	Blue
ENSCHIG00000014977	MM1	Blue
ENSCHIG00000014996	MM1	Blue
ENSCHIG00000015001	MM1	Blue
ENSCHIG00000015007	MM1	Blue
ENSCHIG00000015008	MM1	Blue
ENSCHIG00000015010	MM1	Blue
ENSCHIG00000015013	MM1	Blue
ENSCHIG00000015027	MM1	Blue
ENSCHIG00000015031	MM1	Blue
ENSCHIG00000015041	MM1	Blue
ENSCHIG00000015042	MM1	Blue
ENSCHIG00000015052	MM1	Blue
ENSCHIG00000015055	MM1	Blue
ENSCHIG00000015056	MM1	Blue
ENSCHIG00000015060	MM1	Blue
ENSCHIG00000015067	MM1	Blue
ENSCHIG00000015071	MM1	Blue
ENSCHIG00000015078	MM1	Blue
ENSCHIG00000015083	MM1	Blue
ENSCHIG00000015091	MM1	Blue
ENSCHIG00000015094	MM1	Blue
ENSCHIG00000015102	MM1	Blue
ENSCHIG00000015103	MM1	Blue
ENSCHIG00000015107	MM1	Blue
ENSCHIG00000015125	MM1	Blue
ENSCHIG00000015126	MM1	Blue
ENSCHIG00000015128	MM1	Blue
ENSCHIG00000015136	MM1	Blue
ENSCHIG00000015150	MM1	Blue
ENSCHIG00000015152	MM1	Blue
ENSCHIG00000015154	MM1	Blue
ENSCHIG00000015158	MM1	Blue
ENSCHIG00000015174	MM1	Blue
ENSCHIG00000015182	MM1	Blue
ENSCHIG00000015193	MM1	Blue
ENSCHIG00000015194	MM1	Blue
ENSCHIG00000015195	MM1	Blue
ENSCHIG00000015201	MM1	Blue
ENSCHIG00000015211	MM1	Blue
ENSCHIG00000015217	MM1	Blue
ENSCHIG00000015222	MM1	Blue
ENSCHIG00000015236	MM1	Blue
ENSCHIG00000015237	MM1	Blue
ENSCHIG00000015238	MM1	Blue
ENSCHIG00000015242	MM1	Blue
ENSCHIG00000015243	MM1	Blue
ENSCHIG00000015250	MM1	Blue
ENSCHIG00000015261	MM1	Blue
ENSCHIG00000015264	MM1	Blue
ENSCHIG00000015265	MM1	Blue
ENSCHIG00000015270	MM1	Blue
ENSCHIG00000015271	MM1	Blue
ENSCHIG00000015285	MM1	Blue
ENSCHIG00000015286	MM1	Blue
ENSCHIG00000015294	MM1	Blue
ENSCHIG00000015296	MM1	Blue
ENSCHIG00000015314	MM1	Blue
ENSCHIG00000015317	MM1	Blue
ENSCHIG00000015319	MM1	Blue
ENSCHIG00000015322	MM1	Blue
ENSCHIG00000015325	MM1	Blue
ENSCHIG00000015336	MM1	Blue
ENSCHIG00000015340	MM1	Blue
ENSCHIG00000015352	MM1	Blue
ENSCHIG00000015365	MM1	Blue
ENSCHIG00000015367	MM1	Blue
ENSCHIG00000015370	MM1	Blue
ENSCHIG00000015374	MM1	Blue
ENSCHIG00000015382	MM1	Blue
ENSCHIG00000015384	MM1	Blue
ENSCHIG00000015396	MM1	Blue
ENSCHIG00000015410	MM1	Blue
ENSCHIG00000015414	MM1	Blue
ENSCHIG00000015437	MM1	Blue
ENSCHIG00000015441	MM1	Blue
ENSCHIG00000015446	MM1	Blue
ENSCHIG00000015448	MM1	Blue
ENSCHIG00000015464	MM1	Blue
ENSCHIG00000015468	MM1	Blue
ENSCHIG00000015469	MM1	Blue
ENSCHIG00000015479	MM1	Blue
ENSCHIG00000015500	MM1	Blue
ENSCHIG00000015507	MM1	Blue
ENSCHIG00000015510	MM1	Blue
ENSCHIG00000015511	MM1	Blue
ENSCHIG00000015517	MM1	Blue
ENSCHIG00000015520	MM1	Blue
ENSCHIG00000015533	MM1	Blue
ENSCHIG00000015548	MM1	Blue
ENSCHIG00000015550	MM1	Blue
ENSCHIG00000015555	MM1	Blue
ENSCHIG00000015556	MM1	Blue
ENSCHIG00000015578	MM1	Blue
ENSCHIG00000015579	MM1	Blue
ENSCHIG00000015588	MM1	Blue
ENSCHIG00000015595	MM1	Blue
ENSCHIG00000015596	MM1	Blue
ENSCHIG00000015615	MM1	Blue
ENSCHIG00000015622	MM1	Blue
ENSCHIG00000015627	MM1	Blue
ENSCHIG00000015628	MM1	Blue
ENSCHIG00000015633	MM1	Blue
ENSCHIG00000015642	MM1	Blue
ENSCHIG00000015646	MM1	Blue
ENSCHIG00000015658	MM1	Blue
ENSCHIG00000015662	MM1	Blue
ENSCHIG00000015667	MM1	Blue
ENSCHIG00000015673	MM1	Blue
ENSCHIG00000015678	MM1	Blue
ENSCHIG00000015680	MM1	Blue
ENSCHIG00000015681	MM1	Blue
ENSCHIG00000015685	MM1	Blue
ENSCHIG00000015688	MM1	Blue
ENSCHIG00000015693	MM1	Blue
ENSCHIG00000015695	MM1	Blue
ENSCHIG00000015705	MM1	Blue
ENSCHIG00000015716	MM1	Blue
ENSCHIG00000015720	MM1	Blue
ENSCHIG00000015722	MM1	Blue
ENSCHIG00000015744	MM1	Blue
ENSCHIG00000015753	MM1	Blue
ENSCHIG00000015754	MM1	Blue
ENSCHIG00000015757	MM1	Blue
ENSCHIG00000015760	MM1	Blue
ENSCHIG00000015766	MM1	Blue
ENSCHIG00000015776	MM1	Blue
ENSCHIG00000015778	MM1	Blue
ENSCHIG00000015783	MM1	Blue
ENSCHIG00000015796	MM1	Blue
ENSCHIG00000015798	MM1	Blue
ENSCHIG00000015813	MM1	Blue
ENSCHIG00000015815	MM1	Blue
ENSCHIG00000015818	MM1	Blue
ENSCHIG00000015819	MM1	Blue
ENSCHIG00000015823	MM1	Blue
ENSCHIG00000015824	MM1	Blue
ENSCHIG00000015830	MM1	Blue
ENSCHIG00000015832	MM1	Blue
ENSCHIG00000015847	MM1	Blue
ENSCHIG00000015848	MM1	Blue
ENSCHIG00000015857	MM1	Blue
ENSCHIG00000015859	MM1	Blue
ENSCHIG00000015860	MM1	Blue
ENSCHIG00000015863	MM1	Blue
ENSCHIG00000015866	MM1	Blue
ENSCHIG00000015868	MM1	Blue
ENSCHIG00000015870	MM1	Blue
ENSCHIG00000015875	MM1	Blue
ENSCHIG00000015876	MM1	Blue
ENSCHIG00000015877	MM1	Blue
ENSCHIG00000015881	MM1	Blue
ENSCHIG00000015896	MM1	Blue
ENSCHIG00000015900	MM1	Blue
ENSCHIG00000015902	MM1	Blue
ENSCHIG00000015904	MM1	Blue
ENSCHIG00000015906	MM1	Blue
ENSCHIG00000015913	MM1	Blue
ENSCHIG00000015922	MM1	Blue
ENSCHIG00000015928	MM1	Blue
ENSCHIG00000015933	MM1	Blue
ENSCHIG00000015934	MM1	Blue
ENSCHIG00000015940	MM1	Blue
ENSCHIG00000015943	MM1	Blue
ENSCHIG00000015945	MM1	Blue
ENSCHIG00000015947	MM1	Blue
ENSCHIG00000015949	MM1	Blue
ENSCHIG00000015952	MM1	Blue
ENSCHIG00000015953	MM1	Blue
ENSCHIG00000015962	MM1	Blue
ENSCHIG00000015963	MM1	Blue
ENSCHIG00000015974	MM1	Blue
ENSCHIG00000015983	MM1	Blue
ENSCHIG00000015991	MM1	Blue
ENSCHIG00000015996	MM1	Blue
ENSCHIG00000016001	MM1	Blue
ENSCHIG00000016012	MM1	Blue
ENSCHIG00000016024	MM1	Blue
ENSCHIG00000016035	MM1	Blue
ENSCHIG00000016047	MM1	Blue
ENSCHIG00000016050	MM1	Blue
ENSCHIG00000016057	MM1	Blue
ENSCHIG00000016059	MM1	Blue
ENSCHIG00000016064	MM1	Blue
ENSCHIG00000016072	MM1	Blue
ENSCHIG00000016075	MM1	Blue
ENSCHIG00000016083	MM1	Blue
ENSCHIG00000016087	MM1	Blue
ENSCHIG00000016091	MM1	Blue
ENSCHIG00000016108	MM1	Blue
ENSCHIG00000016112	MM1	Blue
ENSCHIG00000016118	MM1	Blue
ENSCHIG00000016123	MM1	Blue
ENSCHIG00000016134	MM1	Blue
ENSCHIG00000016136	MM1	Blue
ENSCHIG00000016140	MM1	Blue
ENSCHIG00000016141	MM1	Blue
ENSCHIG00000016144	MM1	Blue
ENSCHIG00000016148	MM1	Blue
ENSCHIG00000016152	MM1	Blue
ENSCHIG00000016159	MM1	Blue
ENSCHIG00000016162	MM1	Blue
ENSCHIG00000016163	MM1	Blue
ENSCHIG00000016170	MM1	Blue
ENSCHIG00000016172	MM1	Blue
ENSCHIG00000016178	MM1	Blue
ENSCHIG00000016185	MM1	Blue
ENSCHIG00000016186	MM1	Blue
ENSCHIG00000016187	MM1	Blue
ENSCHIG00000016188	MM1	Blue
ENSCHIG00000016200	MM1	Blue
ENSCHIG00000016205	MM1	Blue
ENSCHIG00000016220	MM1	Blue
ENSCHIG00000016221	MM1	Blue
ENSCHIG00000016225	MM1	Blue
ENSCHIG00000016231	MM1	Blue
ENSCHIG00000016232	MM1	Blue
ENSCHIG00000016240	MM1	Blue
ENSCHIG00000016241	MM1	Blue
ENSCHIG00000016243	MM1	Blue
ENSCHIG00000016247	MM1	Blue
ENSCHIG00000016257	MM1	Blue
ENSCHIG00000016261	MM1	Blue
ENSCHIG00000016268	MM1	Blue
ENSCHIG00000016273	MM1	Blue
ENSCHIG00000016276	MM1	Blue
ENSCHIG00000016279	MM1	Blue
ENSCHIG00000016282	MM1	Blue
ENSCHIG00000016283	MM1	Blue
ENSCHIG00000016284	MM1	Blue
ENSCHIG00000016294	MM1	Blue
ENSCHIG00000016298	MM1	Blue
ENSCHIG00000016315	MM1	Blue
ENSCHIG00000016319	MM1	Blue
ENSCHIG00000016320	MM1	Blue
ENSCHIG00000016329	MM1	Blue
ENSCHIG00000016349	MM1	Blue
ENSCHIG00000016359	MM1	Blue
ENSCHIG00000016372	MM1	Blue
ENSCHIG00000016373	MM1	Blue
ENSCHIG00000016374	MM1	Blue
ENSCHIG00000016379	MM1	Blue
ENSCHIG00000016395	MM1	Blue
ENSCHIG00000016407	MM1	Blue
ENSCHIG00000016412	MM1	Blue
ENSCHIG00000016413	MM1	Blue
ENSCHIG00000016419	MM1	Blue
ENSCHIG00000016423	MM1	Blue
ENSCHIG00000016434	MM1	Blue
ENSCHIG00000016442	MM1	Blue
ENSCHIG00000016447	MM1	Blue
ENSCHIG00000016448	MM1	Blue
ENSCHIG00000016454	MM1	Blue
ENSCHIG00000016457	MM1	Blue
ENSCHIG00000016465	MM1	Blue
ENSCHIG00000016466	MM1	Blue
ENSCHIG00000016475	MM1	Blue
ENSCHIG00000016477	MM1	Blue
ENSCHIG00000016481	MM1	Blue
ENSCHIG00000016505	MM1	Blue
ENSCHIG00000016508	MM1	Blue
ENSCHIG00000016522	MM1	Blue
ENSCHIG00000016540	MM1	Blue
ENSCHIG00000016541	MM1	Blue
ENSCHIG00000016542	MM1	Blue
ENSCHIG00000016545	MM1	Blue
ENSCHIG00000016546	MM1	Blue
ENSCHIG00000016555	MM1	Blue
ENSCHIG00000016558	MM1	Blue
ENSCHIG00000016569	MM1	Blue
ENSCHIG00000016585	MM1	Blue
ENSCHIG00000016586	MM1	Blue
ENSCHIG00000016589	MM1	Blue
ENSCHIG00000016599	MM1	Blue
ENSCHIG00000016600	MM1	Blue
ENSCHIG00000016603	MM1	Blue
ENSCHIG00000016611	MM1	Blue
ENSCHIG00000016629	MM1	Blue
ENSCHIG00000016634	MM1	Blue
ENSCHIG00000016635	MM1	Blue
ENSCHIG00000016639	MM1	Blue
ENSCHIG00000016640	MM1	Blue
ENSCHIG00000016649	MM1	Blue
ENSCHIG00000016653	MM1	Blue
ENSCHIG00000016661	MM1	Blue
ENSCHIG00000016671	MM1	Blue
ENSCHIG00000016673	MM1	Blue
ENSCHIG00000016684	MM1	Blue
ENSCHIG00000016697	MM1	Blue
ENSCHIG00000016703	MM1	Blue
ENSCHIG00000016707	MM1	Blue
ENSCHIG00000016710	MM1	Blue
ENSCHIG00000016712	MM1	Blue
ENSCHIG00000016724	MM1	Blue
ENSCHIG00000016727	MM1	Blue
ENSCHIG00000016732	MM1	Blue
ENSCHIG00000016759	MM1	Blue
ENSCHIG00000016761	MM1	Blue
ENSCHIG00000016764	MM1	Blue
ENSCHIG00000016768	MM1	Blue
ENSCHIG00000016773	MM1	Blue
ENSCHIG00000016774	MM1	Blue
ENSCHIG00000016779	MM1	Blue
ENSCHIG00000016784	MM1	Blue
ENSCHIG00000016790	MM1	Blue
ENSCHIG00000016799	MM1	Blue
ENSCHIG00000016801	MM1	Blue
ENSCHIG00000016806	MM1	Blue
ENSCHIG00000016816	MM1	Blue
ENSCHIG00000016823	MM1	Blue
ENSCHIG00000016829	MM1	Blue
ENSCHIG00000016841	MM1	Blue
ENSCHIG00000016843	MM1	Blue
ENSCHIG00000016856	MM1	Blue
ENSCHIG00000016857	MM1	Blue
ENSCHIG00000016861	MM1	Blue
ENSCHIG00000016869	MM1	Blue
ENSCHIG00000016875	MM1	Blue
ENSCHIG00000016878	MM1	Blue
ENSCHIG00000016895	MM1	Blue
ENSCHIG00000016897	MM1	Blue
ENSCHIG00000016906	MM1	Blue
ENSCHIG00000016920	MM1	Blue
ENSCHIG00000016930	MM1	Blue
ENSCHIG00000016937	MM1	Blue
ENSCHIG00000016942	MM1	Blue
ENSCHIG00000016943	MM1	Blue
ENSCHIG00000016944	MM1	Blue
ENSCHIG00000016948	MM1	Blue
ENSCHIG00000016950	MM1	Blue
ENSCHIG00000016954	MM1	Blue
ENSCHIG00000016959	MM1	Blue
ENSCHIG00000016962	MM1	Blue
ENSCHIG00000016966	MM1	Blue
ENSCHIG00000016968	MM1	Blue
ENSCHIG00000016971	MM1	Blue
ENSCHIG00000016983	MM1	Blue
ENSCHIG00000016987	MM1	Blue
ENSCHIG00000016998	MM1	Blue
ENSCHIG00000017007	MM1	Blue
ENSCHIG00000017018	MM1	Blue
ENSCHIG00000017020	MM1	Blue
ENSCHIG00000017031	MM1	Blue
ENSCHIG00000017045	MM1	Blue
ENSCHIG00000017049	MM1	Blue
ENSCHIG00000017050	MM1	Blue
ENSCHIG00000017066	MM1	Blue
ENSCHIG00000017072	MM1	Blue
ENSCHIG00000017073	MM1	Blue
ENSCHIG00000017079	MM1	Blue
ENSCHIG00000017080	MM1	Blue
ENSCHIG00000017089	MM1	Blue
ENSCHIG00000017103	MM1	Blue
ENSCHIG00000017106	MM1	Blue
ENSCHIG00000017110	MM1	Blue
ENSCHIG00000017112	MM1	Blue
ENSCHIG00000017119	MM1	Blue
ENSCHIG00000017126	MM1	Blue
ENSCHIG00000017129	MM1	Blue
ENSCHIG00000017133	MM1	Blue
ENSCHIG00000017137	MM1	Blue
ENSCHIG00000017145	MM1	Blue
ENSCHIG00000017147	MM1	Blue
ENSCHIG00000017161	MM1	Blue
ENSCHIG00000017168	MM1	Blue
ENSCHIG00000017169	MM1	Blue
ENSCHIG00000017174	MM1	Blue
ENSCHIG00000017175	MM1	Blue
ENSCHIG00000017177	MM1	Blue
ENSCHIG00000017186	MM1	Blue
ENSCHIG00000017194	MM1	Blue
ENSCHIG00000017195	MM1	Blue
ENSCHIG00000017196	MM1	Blue
ENSCHIG00000017202	MM1	Blue
ENSCHIG00000017213	MM1	Blue
ENSCHIG00000017230	MM1	Blue
ENSCHIG00000017233	MM1	Blue
ENSCHIG00000017234	MM1	Blue
ENSCHIG00000017235	MM1	Blue
ENSCHIG00000017243	MM1	Blue
ENSCHIG00000017244	MM1	Blue
ENSCHIG00000017263	MM1	Blue
ENSCHIG00000017268	MM1	Blue
ENSCHIG00000017276	MM1	Blue
ENSCHIG00000017284	MM1	Blue
ENSCHIG00000017288	MM1	Blue
ENSCHIG00000017290	MM1	Blue
ENSCHIG00000017312	MM1	Blue
ENSCHIG00000017319	MM1	Blue
ENSCHIG00000017322	MM1	Blue
ENSCHIG00000017329	MM1	Blue
ENSCHIG00000017337	MM1	Blue
ENSCHIG00000017340	MM1	Blue
ENSCHIG00000017351	MM1	Blue
ENSCHIG00000017358	MM1	Blue
ENSCHIG00000017364	MM1	Blue
ENSCHIG00000017368	MM1	Blue
ENSCHIG00000017370	MM1	Blue
ENSCHIG00000017375	MM1	Blue
ENSCHIG00000017378	MM1	Blue
ENSCHIG00000017381	MM1	Blue
ENSCHIG00000017382	MM1	Blue
ENSCHIG00000017393	MM1	Blue
ENSCHIG00000017395	MM1	Blue
ENSCHIG00000017396	MM1	Blue
ENSCHIG00000017403	MM1	Blue
ENSCHIG00000017405	MM1	Blue
ENSCHIG00000017416	MM1	Blue
ENSCHIG00000017418	MM1	Blue
ENSCHIG00000017425	MM1	Blue
ENSCHIG00000017427	MM1	Blue
ENSCHIG00000017436	MM1	Blue
ENSCHIG00000017442	MM1	Blue
ENSCHIG00000017443	MM1	Blue
ENSCHIG00000017457	MM1	Blue
ENSCHIG00000017463	MM1	Blue
ENSCHIG00000017467	MM1	Blue
ENSCHIG00000017469	MM1	Blue
ENSCHIG00000017495	MM1	Blue
ENSCHIG00000017498	MM1	Blue
ENSCHIG00000017505	MM1	Blue
ENSCHIG00000017525	MM1	Blue
ENSCHIG00000017529	MM1	Blue
ENSCHIG00000017531	MM1	Blue
ENSCHIG00000017533	MM1	Blue
ENSCHIG00000017538	MM1	Blue
ENSCHIG00000017540	MM1	Blue
ENSCHIG00000017555	MM1	Blue
ENSCHIG00000017557	MM1	Blue
ENSCHIG00000017563	MM1	Blue
ENSCHIG00000017564	MM1	Blue
ENSCHIG00000017568	MM1	Blue
ENSCHIG00000017574	MM1	Blue
ENSCHIG00000017577	MM1	Blue
ENSCHIG00000017578	MM1	Blue
ENSCHIG00000017587	MM1	Blue
ENSCHIG00000017592	MM1	Blue
ENSCHIG00000017595	MM1	Blue
ENSCHIG00000017607	MM1	Blue
ENSCHIG00000017608	MM1	Blue
ENSCHIG00000017609	MM1	Blue
ENSCHIG00000017610	MM1	Blue
ENSCHIG00000017619	MM1	Blue
ENSCHIG00000017623	MM1	Blue
ENSCHIG00000017627	MM1	Blue
ENSCHIG00000017658	MM1	Blue
ENSCHIG00000017666	MM1	Blue
ENSCHIG00000017668	MM1	Blue
ENSCHIG00000017677	MM1	Blue
ENSCHIG00000017683	MM1	Blue
ENSCHIG00000017692	MM1	Blue
ENSCHIG00000017694	MM1	Blue
ENSCHIG00000017702	MM1	Blue
ENSCHIG00000017705	MM1	Blue
ENSCHIG00000017708	MM1	Blue
ENSCHIG00000017717	MM1	Blue
ENSCHIG00000017718	MM1	Blue
ENSCHIG00000017734	MM1	Blue
ENSCHIG00000017742	MM1	Blue
ENSCHIG00000017755	MM1	Blue
ENSCHIG00000017759	MM1	Blue
ENSCHIG00000017760	MM1	Blue
ENSCHIG00000017771	MM1	Blue
ENSCHIG00000017776	MM1	Blue
ENSCHIG00000017777	MM1	Blue
ENSCHIG00000017780	MM1	Blue
ENSCHIG00000017785	MM1	Blue
ENSCHIG00000017792	MM1	Blue
ENSCHIG00000017805	MM1	Blue
ENSCHIG00000017812	MM1	Blue
ENSCHIG00000017820	MM1	Blue
ENSCHIG00000017830	MM1	Blue
ENSCHIG00000017836	MM1	Blue
ENSCHIG00000017838	MM1	Blue
ENSCHIG00000017842	MM1	Blue
ENSCHIG00000017844	MM1	Blue
ENSCHIG00000017847	MM1	Blue
ENSCHIG00000017867	MM1	Blue
ENSCHIG00000017877	MM1	Blue
ENSCHIG00000017883	MM1	Blue
ENSCHIG00000017893	MM1	Blue
ENSCHIG00000017902	MM1	Blue
ENSCHIG00000017910	MM1	Blue
ENSCHIG00000017913	MM1	Blue
ENSCHIG00000017915	MM1	Blue
ENSCHIG00000017917	MM1	Blue
ENSCHIG00000017924	MM1	Blue
ENSCHIG00000017933	MM1	Blue
ENSCHIG00000017952	MM1	Blue
ENSCHIG00000017959	MM1	Blue
ENSCHIG00000017960	MM1	Blue
ENSCHIG00000017964	MM1	Blue
ENSCHIG00000017966	MM1	Blue
ENSCHIG00000017968	MM1	Blue
ENSCHIG00000017973	MM1	Blue
ENSCHIG00000017992	MM1	Blue
ENSCHIG00000018003	MM1	Blue
ENSCHIG00000018006	MM1	Blue
ENSCHIG00000018009	MM1	Blue
ENSCHIG00000018015	MM1	Blue
ENSCHIG00000018016	MM1	Blue
ENSCHIG00000018027	MM1	Blue
ENSCHIG00000018042	MM1	Blue
ENSCHIG00000018043	MM1	Blue
ENSCHIG00000018044	MM1	Blue
ENSCHIG00000018045	MM1	Blue
ENSCHIG00000018048	MM1	Blue
ENSCHIG00000018050	MM1	Blue
ENSCHIG00000018051	MM1	Blue
ENSCHIG00000018053	MM1	Blue
ENSCHIG00000018054	MM1	Blue
ENSCHIG00000018055	MM1	Blue
ENSCHIG00000018056	MM1	Blue
ENSCHIG00000018064	MM1	Blue
ENSCHIG00000018067	MM1	Blue
ENSCHIG00000018090	MM1	Blue
ENSCHIG00000018098	MM1	Blue
ENSCHIG00000018107	MM1	Blue
ENSCHIG00000018109	MM1	Blue
ENSCHIG00000018110	MM1	Blue
ENSCHIG00000018111	MM1	Blue
ENSCHIG00000018112	MM1	Blue
ENSCHIG00000018126	MM1	Blue
ENSCHIG00000018130	MM1	Blue
ENSCHIG00000018131	MM1	Blue
ENSCHIG00000018135	MM1	Blue
ENSCHIG00000018138	MM1	Blue
ENSCHIG00000018140	MM1	Blue
ENSCHIG00000018142	MM1	Blue
ENSCHIG00000018155	MM1	Blue
ENSCHIG00000018156	MM1	Blue
ENSCHIG00000018161	MM1	Blue
ENSCHIG00000018172	MM1	Blue
ENSCHIG00000018173	MM1	Blue
ENSCHIG00000018174	MM1	Blue
ENSCHIG00000018175	MM1	Blue
ENSCHIG00000018180	MM1	Blue
ENSCHIG00000018182	MM1	Blue
ENSCHIG00000018189	MM1	Blue
ENSCHIG00000018194	MM1	Blue
ENSCHIG00000018198	MM1	Blue
ENSCHIG00000018216	MM1	Blue
ENSCHIG00000018219	MM1	Blue
ENSCHIG00000018232	MM1	Blue
ENSCHIG00000018236	MM1	Blue
ENSCHIG00000018244	MM1	Blue
ENSCHIG00000018245	MM1	Blue
ENSCHIG00000018255	MM1	Blue
ENSCHIG00000018265	MM1	Blue
ENSCHIG00000018274	MM1	Blue
ENSCHIG00000018276	MM1	Blue
ENSCHIG00000018280	MM1	Blue
ENSCHIG00000018284	MM1	Blue
ENSCHIG00000018288	MM1	Blue
ENSCHIG00000018291	MM1	Blue
ENSCHIG00000018296	MM1	Blue
ENSCHIG00000018304	MM1	Blue
ENSCHIG00000018315	MM1	Blue
ENSCHIG00000018317	MM1	Blue
ENSCHIG00000018319	MM1	Blue
ENSCHIG00000018338	MM1	Blue
ENSCHIG00000018345	MM1	Blue
ENSCHIG00000018349	MM1	Blue
ENSCHIG00000018351	MM1	Blue
ENSCHIG00000018357	MM1	Blue
ENSCHIG00000018358	MM1	Blue
ENSCHIG00000018362	MM1	Blue
ENSCHIG00000018363	MM1	Blue
ENSCHIG00000018367	MM1	Blue
ENSCHIG00000018369	MM1	Blue
ENSCHIG00000018371	MM1	Blue
ENSCHIG00000018372	MM1	Blue
ENSCHIG00000018374	MM1	Blue
ENSCHIG00000018375	MM1	Blue
ENSCHIG00000018377	MM1	Blue
ENSCHIG00000018385	MM1	Blue
ENSCHIG00000018392	MM1	Blue
ENSCHIG00000018398	MM1	Blue
ENSCHIG00000018399	MM1	Blue
ENSCHIG00000018408	MM1	Blue
ENSCHIG00000018412	MM1	Blue
ENSCHIG00000018414	MM1	Blue
ENSCHIG00000018415	MM1	Blue
ENSCHIG00000018421	MM1	Blue
ENSCHIG00000018425	MM1	Blue
ENSCHIG00000018428	MM1	Blue
ENSCHIG00000018433	MM1	Blue
ENSCHIG00000018439	MM1	Blue
ENSCHIG00000018449	MM1	Blue
ENSCHIG00000018455	MM1	Blue
ENSCHIG00000018459	MM1	Blue
ENSCHIG00000018462	MM1	Blue
ENSCHIG00000018463	MM1	Blue
ENSCHIG00000018472	MM1	Blue
ENSCHIG00000018474	MM1	Blue
ENSCHIG00000018484	MM1	Blue
ENSCHIG00000018491	MM1	Blue
ENSCHIG00000018500	MM1	Blue
ENSCHIG00000018504	MM1	Blue
ENSCHIG00000018510	MM1	Blue
ENSCHIG00000018514	MM1	Blue
ENSCHIG00000018515	MM1	Blue
ENSCHIG00000018518	MM1	Blue
ENSCHIG00000018520	MM1	Blue
ENSCHIG00000018528	MM1	Blue
ENSCHIG00000018532	MM1	Blue
ENSCHIG00000018533	MM1	Blue
ENSCHIG00000018539	MM1	Blue
ENSCHIG00000018545	MM1	Blue
ENSCHIG00000018546	MM1	Blue
ENSCHIG00000018551	MM1	Blue
ENSCHIG00000018554	MM1	Blue
ENSCHIG00000018557	MM1	Blue
ENSCHIG00000018561	MM1	Blue
ENSCHIG00000018562	MM1	Blue
ENSCHIG00000018576	MM1	Blue
ENSCHIG00000018578	MM1	Blue
ENSCHIG00000018580	MM1	Blue
ENSCHIG00000018581	MM1	Blue
ENSCHIG00000018588	MM1	Blue
ENSCHIG00000018601	MM1	Blue
ENSCHIG00000018622	MM1	Blue
[truncated: 5,899 more rows]
