# Supplementary material for: RNA-Seq Implies Divergent Regulation Patterns of LincRNA on Spermatogenesis and Testis Growth in Goats
Source: Animals (Basel). 2021 Feb 26;11(3):625. doi: 10.3390/ani11030625 (PMC7996862; doi:10.3390/ani11030625)
Supplement: Supplementary file 1 [file animals-11-00625-s001.zip › Table S8.xlsx]

## Sheet: Table S8
GO Biological Process	GO id	Count	Enrichment fold	P-value	FDR
Negative regulation of membrane potential	GO:0045837	7	4.63	0.000966	0.0398
Endoplasmic reticulum to cytosol transport	GO:1903513	11	3.64	0.00031	0.0157
Retrograde protein transport, ER to cytosol	GO:0030970	11	3.64	0.00031	0.0157
Protein exit from endoplasmic reticulum	GO:0032527	14	3.37	0.000112	0.00684
Protein quality control for misfolded or incompletely synthesized proteins	GO:0006515	16	3.14	8.58e-05	0.00548
Centriole assembly	GO:0098534	13	3.13	0.000389	0.019
Centriole replication	GO:0007099	11	3.06	0.00124	0.0487
Regulation of fatty acid oxidation	GO:0046320	13	2.87	0.000858	0.0359
Male meiotic nuclear division	GO:0007140	19	2.79	8.93e-05	0.00565
Acyl-CoA biosynthetic process	GO:0071616	14	2.74	0.000838	0.0356
Thioester biosynthetic process	GO:0035384	14	2.74	0.000838	0.0355
Regulation of autophagy of mitochondrion	GO:1903146	16	2.73	0.000391	0.0191
Centrosome duplication	GO:0051298	15	2.65	0.000802	0.0346
Negative regulation of mitochondrion organization	GO:0010823	19	2.65	0.000176	0.00972
Negative regulation of intracellular transport	GO:0032387	20	2.58	0.000166	0.00928
Negative regulation of organelle assembly	GO:1902116	15	2.56	0.0011	0.0446
Negative regulation of response to endoplasmic reticulum stress	GO:1903573	17	2.5	0.0007	0.031
Regulation of vacuole organization	GO:0044088	18	2.38	0.000852	0.0359
Nucleoside bisphosphate biosynthetic process	GO:0033866	17	2.37	0.00124	0.0483
Purine nucleoside bisphosphate biosynthetic process	GO:0034033	17	2.37	0.00124	0.0486
Ribonucleoside bisphosphate biosynthetic process	GO:0034030	17	2.37	0.00124	0.0485
Endocytic recycling	GO:0032456	18	2.32	0.00112	0.0447
Homologous chromosome pairing at meiosis	GO:0007129	18	2.32	0.00112	0.0449
Regulation of response to endoplasmic reticulum stress	GO:1905897	29	2.29	5.57e-05	0.00386
Establishment of protein localization to vacuole	GO:0072666	19	2.28	0.001	0.041
Regulation of translational initiation	GO:0006446	25	2.28	0.000185	0.0102
Protein localization to vacuole	GO:0072665	24	2.27	0.000266	0.0139
Positive regulation of macroautophagy	GO:0016239	23	2.21	0.00049	0.0233
Peptidyl-threonine phosphorylation	GO:0018107	30	2.2	8.14e-05	0.00522
Regulation of mitochondrion organization	GO:0010821	45	2.2	1.66e-06	0.000187
Positive regulation of mitochondrion organization	GO:0010822	24	2.19	0.000434	0.0209
Chromosome organization involved in meiotic cell cycle	GO:0070192	25	2.17	0.000383	0.0188
Protein N-linked glycosylation	GO:0006487	27	2.16	0.000237	0.0125
Ribonucleoprotein complex localization	GO:0071166	30	2.15	0.00013	0.00754
Ubiquitin-dependent ERAD pathway	GO:0030433	30	2.15	0.00013	0.00751
Peptidyl-threonine modification	GO:0018210	32	2.14	8.04e-05	0.00518
Cytosolic transport	GO:0016482	48	2.12	2.28e-06	0.000245
Ribonucleoprotein complex export from nucleus	GO:0071426	29	2.1	0.00023	0.0123
mRNA transport	GO:0051028	34	2.09	7.78e-05	0.00503
Protein export from nucleus	GO:0006611	38	2.09	3.01e-05	0.00228
RNA export from nucleus	GO:0006405	33	2.08	0.00011	0.00675
Positive regulation of histone modification	GO:0031058	29	2.07	0.000286	0.0148
Negative regulation of protein-containing complex disassembly	GO:0043242	28	2.06	0.000405	0.0197
Response to heat	GO:0009408	24	2.05	0.00106	0.0432
ERAD pathway	GO:0036503	34	2.04	0.000119	0.00708
Lysosomal transport	GO:0007041	34	2.04	0.000119	0.00711
Meiotic cell cycle process	GO:1903046	57	2.04	8.8e-07	0.000106
Regulation of double-strand break repair	GO:2000779	30	2.04	0.000309	0.0157
Retrograde transport, Endosome to Golgi	GO:0042147	30	2.04	0.000309	0.0157
Meiotic nuclear division	GO:0140013	50	2.02	5.02e-06	0.000498
Post-Golgi vesicle-mediated transport	GO:0006892	29	2.02	0.000435	0.0209
Meiosis I cell cycle process	GO:0061982	36	2.01	0.000111	0.00679
Meiotic cell cycle	GO:0051321	68	2.01	1.36e-07	1.81e-05
Regulation of macroautophagy	GO:0016241	33	2.01	0.000205	0.0112
Regulation of histone modification	GO:0031056	46	1.98	1.9e-05	0.00155
Regulation of protein-containing complex disassembly	GO:0043244	41	1.97	5.57e-05	0.00384
Establishment of RNA localization	GO:0051236	50	1.96	1.09e-05	0.000984
Nuclear export	GO:0051168	42	1.95	5.87e-05	0.00401
Nucleic acid transport	GO:0050657	49	1.95	1.52e-05	0.00128
RNA transport	GO:0050658	49	1.95	1.52e-05	0.00129
Response to topologically incorrect protein	GO:0035966	40	1.94	9.37e-05	0.0059
Meiosis I	GO:0007127	34	1.93	0.000318	0.016
Mitochondrial membrane organization	GO:0007006	32	1.92	0.000511	0.0242
Positive regulation of chromatin organization	GO:1905269	32	1.92	0.000511	0.0241
Macroautophagy	GO:0016236	39	1.91	0.000156	0.00877
Vacuolar transport	GO:0007034	48	1.91	3.03e-05	0.00229
Protein polyubiquitination	GO:0000209	74	1.9	3.2e-07	4.1e-05
RNA localization	GO:0006403	55	1.89	1.12e-05	0.00101
Golgi organization	GO:0007030	37	1.88	0.000298	0.0154
Negative regulation of binding	GO:0051100	43	1.88	0.000105	0.00649
Chromatin remodeling	GO:0006338	49	1.87	4.46e-05	0.00318
Microtubule organizing center organization	GO:0031023	30	1.87	0.00117	0.0464
Sulfur compound biosynthetic process	GO:0044272	34	1.87	0.000549	0.0256
Protein-containing complex disassembly	GO:0032984	31	1.86	0.00101	0.0414
Regulation of intracellular protein transport	GO:0033157	57	1.86	1.2e-05	0.00106
Vacuole organization	GO:0007033	43	1.86	0.000125	0.00735
Monocarboxylic acid catabolic process	GO:0072329	34	1.84	0.000775	0.0336
Cellular lipid catabolic process	GO:0044242	58	1.83	1.71e-05	0.00141
Negative regulation of organelle organization	GO:0010639	96	1.83	3.88e-08	5.41e-06
Positive regulation of chromosome organization	GO:2001252	49	1.83	7.38e-05	0.00486
Positive regulation of translation	GO:0045727	36	1.83	0.000578	0.0267
Endosomal transport	GO:0016197	71	1.82	2.25e-06	0.000247
Establishment of protein localization to membrane	GO:0090150	50	1.81	7.52e-05	0.00493
Golgi vesicle transport	GO:0048193	81	1.78	1.18e-06	0.00014
Nuclear transport	GO:0051169	65	1.77	1.38e-05	0.00119
Nucleocytoplasmic transport	GO:0006913	65	1.77	1.38e-05	0.00119
Positive regulation of autophagy	GO:0010508	38	1.76	0.000819	0.035
Regulation of intracellular transport	GO:0032386	78	1.76	2.46e-06	0.000258
Regulation of response to DNA damage stimulus	GO:2001020	63	1.76	2.14e-05	0.00171
Regulation of DNA repair	GO:0006282	38	1.75	0.000955	0.0394
Regulation of chromosome organization	GO:0033044	79	1.74	3.33e-06	0.000342
Autophagy	GO:0006914	60	1.72	6.9e-05	0.00459
Process utilizing autophagic mechanism	GO:0061919	60	1.72	6.9e-05	0.00457
Establishment of protein localization to organelle	GO:0072594	89	1.71	1.87e-06	0.000208
Response to endoplasmic reticulum stress	GO:0034976	66	1.71	3.34e-05	0.00251
Cellular protein catabolic process	GO:0044257	192	1.7	4.19e-12	1.05e-09
Intracellular protein transport	GO:0006886	230	1.7	2.19e-14	7.05e-12
Proteolysis involved in cellular protein catabolic process	GO:0051603	184	1.68	3.01e-11	6.71e-09
Ubiquitin-dependent protein catabolic process	GO:0006511	161	1.68	4.81e-10	9.41e-08
Protein targeting	GO:0006605	62	1.67	0.000118	0.00712
Modification-dependent protein catabolic process	GO:0019941	164	1.66	6.93e-10	1.34e-07
Protein catabolic process	GO:0030163	201	1.66	9.76e-12	2.28e-09
Nucleobase-containing compound transport	GO:0015931	62	1.65	0.000154	0.00876
Regulation of organelle assembly	GO:1902115	49	1.64	0.000773	0.0336
Intracellular transport	GO:0046907	345	1.63	3.99e-18	2.31e-15
Modification-dependent macromolecule catabolic process	GO:0043632	164	1.63	2.49e-09	4.45e-07
Regulation of chromatin organization	GO:1902275	52	1.62	0.000736	0.0323
Male gamete generation	GO:0048232	111	1.61	1.44e-06	0.000166
Proteasome-mediated ubiquitin-dependent protein catabolic process	GO:0043161	92	1.61	1.27e-05	0.00111
Cellular macromolecule catabolic process	GO:0044265	232	1.6	9.02e-12	2.14e-09
Negative regulation of cell cycle process	GO:0010948	53	1.6	0.000818	0.0351
Regulation of protein ubiquitination	GO:0031396	50	1.6	0.00111	0.0447
Establishment of protein localization	GO:0045184	342	1.59	1.04e-16	4.86e-14
Proteasomal protein catabolic process	GO:0010498	99	1.59	8.67e-06	0.000806
Regulation of cellular response to stress	GO:0080135	150	1.59	4.71e-08	6.5e-06
Regulation of mitotic cell cycle phase transition	GO:1901990	63	1.59	0.000363	0.0179
Negative regulation of cellular component organization	GO:0051129	166	1.58	1.45e-08	2.24e-06
Nuclear division	GO:0000280	77	1.58	0.000103	0.00643
Organelle fission	GO:0048285	85	1.58	4.81e-05	0.0034
Protein transport	GO:0015031	321	1.58	2.43e-15	9.27e-13
Regulation of microtubule-based process	GO:0032886	61	1.58	0.000481	0.0229
Spermatogenesis	GO:0007283	104	1.58	6.92e-06	0.000655
Peptide transport	GO:0015833	326	1.57	5.32e-15	1.93e-12
Regulation of apoptotic signaling pathway	GO:2001233	86	1.57	5.28e-05	0.00367
Regulation of protein modification by small protein conjugation or removal	GO:1903320	58	1.57	0.000733	0.0323
Negative regulation of cell cycle	GO:0045786	103	1.56	1.25e-05	0.00111
Protein modification by small protein conjugation	GO:0032446	192	1.56	3.42e-09	5.89e-07
Protein ubiquitination	GO:0016567	177	1.56	1.55e-08	2.36e-06
Regulation of autophagy	GO:0010506	67	1.56	0.000371	0.0183
Germ cell development	GO:0007281	64	1.55	0.000629	0.0282
Macromolecule catabolic process	GO:0009057	248	1.55	2.94e-11	6.65e-09
Mitochondrion organization	GO:0007005	115	1.55	5.28e-06	0.00052
Amide transport	GO:0042886	331	1.54	2.18e-14	7.18e-12
Endomembrane system organization	GO:0010256	98	1.54	3.46e-05	0.00258
Protein modification by small protein conjugation or removal	GO:0070647	226	1.54	3.18e-10	6.31e-08
Cellular process involved in reproduction in multicellular organism	GO:0022412	86	1.53	0.000128	0.00745
Cell cycle process	GO:0022402	214	1.52	3.09e-09	5.39e-07
Protein maturation	GO:0051604	62	1.52	0.00115	0.0455
Regulation of cellular protein localization	GO:1903827	117	1.52	9.53e-06	0.000869
Regulation of translation	GO:0006417	84	1.52	0.000186	0.0102
Response to oxidative stress	GO:0006979	76	1.52	0.000359	0.0179
Positive regulation of organelle organization	GO:0010638	140	1.51	2.55e-06	0.000266
Protein localization to organelle	GO:0033365	160	1.51	3.64e-07	4.59e-05
Cellular response to stress	GO:0033554	362	1.5	4.14e-14	1.28e-11
Establishment of localization in cell	GO:0051649	403	1.5	2.02e-15	7.93e-13
Cellular response to DNA damage stimulus	GO:0006974	176	1.48	4.77e-07	5.95e-05
Posttranscriptional regulation of gene expression	GO:0010608	110	1.48	4.92e-05	0.00346
Regulation of establishment of protein localization	GO:0070201	116	1.48	4.02e-05	0.00293
Regulation of protein catabolic process	GO:0042176	88	1.48	0.000299	0.0154
Cellular catabolic process	GO:0044248	406	1.47	1.76e-14	5.93e-12
Cellular macromolecule localization	GO:0070727	361	1.47	7.5e-13	2.05e-10
Cellular protein localization	GO:0034613	360	1.47	5.84e-13	1.63e-10
Covalent chromatin modification	GO:0016569	99	1.47	0.000154	0.00874
Peptidyl-lysine modification	GO:0018205	76	1.47	0.000888	0.0371
DNA repair	GO:0006281	110	1.46	0.000105	0.00651
Histone modification	GO:0016570	97	1.46	0.00022	0.0119
Regulation of binding	GO:0051098	76	1.46	0.000977	0.0401
Regulation of cellular amide metabolic process	GO:0034248	93	1.46	0.000305	0.0156
Regulation of DNA metabolic process	GO:0051052	84	1.46	0.000555	0.0258
Nitrogen compound transport	GO:0071705	380	1.45	9.99e-13	2.68e-10
Regulation of catabolic process	GO:0009894	195	1.45	3.22e-07	4.09e-05
Cell cycle	GO:0007049	260	1.44	8.14e-09	1.34e-06
Gamete generation	GO:0007276	130	1.44	4.27e-05	0.00308
Organonitrogen compound catabolic process	GO:1901565	255	1.44	1.08e-08	1.69e-06
Protein localization	GO:0008104	463	1.44	3.72e-15	1.38e-12
Regulation of mitotic cell cycle	GO:0007346	103	1.44	0.000234	0.0125
Regulation of organelle organization	GO:0033043	275	1.44	2.05e-09	3.82e-07
Regulation of response to stress	GO:0080134	257	1.44	1.19e-08	1.85e-06
Phospholipid metabolic process	GO:0006644	89	1.43	0.0008	0.0346
Regulation of cellular catabolic process	GO:0031329	160	1.43	9.05e-06	0.000836
Regulation of protein transport	GO:0051223	106	1.43	0.00025	0.0131
Regulation of protein-containing complex assembly	GO:0043254	102	1.43	0.000317	0.0159
Cellular localization	GO:0051641	536	1.42	6.58e-16	2.73e-13
Macromolecule localization	GO:0033036	539	1.42	4.84e-16	2.06e-13
Microtubule cytoskeleton organization	GO:0000226	134	1.42	6.74e-05	0.00452
Positive regulation of catabolic process	GO:0009896	100	1.42	0.000444	0.0213
Cell death	GO:0008219	169	1.41	8.32e-06	0.000777
Organic substance catabolic process	GO:1901575	384	1.41	2.2e-11	5.06e-09
Peptidyl-amino acid modification	GO:0018193	219	1.41	5.23e-07	6.47e-05
Apoptotic process	GO:0006915	154	1.4	3.99e-05	0.00293
Catabolic process	GO:0009056	444	1.4	2.02e-12	5.24e-10
Microtubule-based process	GO:0007017	188	1.4	4.7e-06	0.00047
Organophosphate biosynthetic process	GO:0090407	106	1.4	0.000583	0.0267
Programmed cell death	GO:0012501	161	1.4	2.38e-05	0.00188
Cellular protein modification process	GO:0006464	672	1.39	3.52e-18	2.22e-15
Mitotic cell cycle	GO:0000278	137	1.39	0.000136	0.00784
Organic substance transport	GO:0071702	452	1.39	3.49e-12	8.88e-10
Protein modification process	GO:0036211	672	1.39	3.52e-18	2.12e-15
Regulation of cell cycle process	GO:0010564	132	1.39	0.000153	0.00871
Regulation of cellular localization	GO:0060341	156	1.39	4.68e-05	0.00333
Regulation of peptide transport	GO:0090087	109	1.39	0.000562	0.026
Regulation of protein localization	GO:0032880	178	1.39	1.32e-05	0.00116
Organelle localization	GO:0051640	111	1.38	0.000609	0.0275
Macromolecule modification	GO:0043412	713	1.37	5.98e-18	3.33e-15
Sexual reproduction	GO:0019953	156	1.37	8.69e-05	0.00552
DNA metabolic process	GO:0006259	155	1.36	0.000113	0.00687
Mitotic cell cycle process	GO:1903047	113	1.36	0.00104	0.0421
Negative regulation of protein modification process	GO:0031400	127	1.35	0.000631	0.0282
Chordate embryonic development	GO:0043009	136	1.34	0.000543	0.0254
Organelle organization	GO:0006996	803	1.34	2.7e-18	1.78e-15
Organophosphate metabolic process	GO:0019637	192	1.34	4.19e-05	0.00304
Regulation of cellular component organization	GO:0051128	474	1.34	1.42e-10	2.98e-08
Embryo development ending in birth or egg hatching	GO:0009792	138	1.33	0.00066	0.0294
Head development	GO:0060322	135	1.33	0.000856	0.0359
Multicellular organismal reproductive process	GO:0048609	139	1.33	0.000592	0.027
Neuron development	GO:0048666	170	1.33	0.000167	0.00927
Neuron differentiation	GO:0030182	209	1.33	3.88e-05	0.00287
Neuron projection development	GO:0031175	136	1.33	0.000821	0.035
Regulation of cell cycle	GO:0051726	217	1.33	2.13e-05	0.00171
Developmental process involved in reproduction	GO:0003006	173	1.32	0.000207	0.0112
Generation of neurons	GO:0048699	252	1.32	9.2e-06	0.000844
Multicellular organism reproduction	GO:0032504	142	1.32	0.000839	0.0355
Positive regulation of cellular component organization	GO:0051130	218	1.32	3.99e-05	0.00292
Cellular protein metabolic process	GO:0044267	823	1.31	1.75e-16	7.91e-14
Negative regulation of cell death	GO:0060548	182	1.31	0.000226	0.0122
Negative regulation of response to stimulus	GO:0048585	313	1.31	1.58e-06	0.000179
Proteolysis	GO:0006508	308	1.31	1.51e-06	0.000172
Regulation of anatomical structure morphogenesis	GO:0022603	178	1.31	0.000234	0.0124
Regulation of cellular component biogenesis	GO:0044087	199	1.31	9.91e-05	0.00619
Cell development	GO:0048468	331	1.3	1.48e-06	0.00017
Cellular macromolecule metabolic process	GO:0044260	1077	1.3	3.84e-21	3.47e-18
Nucleobase-containing compound biosynthetic process	GO:0034654	160	1.3	0.000762	0.0332
Phosphorylation	GO:0016310	255	1.3	2.4e-05	0.00188
Positive regulation of cellular protein metabolic process	GO:0032270	318	1.3	2.55e-06	0.000264
Positive regulation of protein metabolic process	GO:0051247	336	1.3	1.2e-06	0.000142
Regulation of intracellular signal transduction	GO:1902531	315	1.3	2.26e-06	0.000246
Vesicle-mediated transport	GO:0016192	273	1.3	1.38e-05	0.00118
Negative regulation of biological process	GO:0048519	1074	1.29	1.98e-19	1.43e-16
Neurogenesis	GO:0022008	274	1.29	1.49e-05	0.00127
Nucleic acid metabolic process	GO:0090304	436	1.29	7.03e-08	9.61e-06
Phosphate-containing compound metabolic process	GO:0006796	442	1.29	3.13e-08	4.44e-06
Phosphorus metabolic process	GO:0006793	448	1.29	2.9e-08	4.16e-06
Positive regulation of macromolecule biosynthetic process	GO:0010557	371	1.29	6.89e-07	8.47e-05
Regulation of protein metabolic process	GO:0051246	586	1.29	1.18e-10	2.52e-08
Reproduction	GO:0000003	256	1.29	2.61e-05	0.00201
Reproductive process	GO:0022414	255	1.29	2.72e-05	0.00208
Central nervous system development	GO:0007417	165	1.28	0.000951	0.0394
Heterocycle biosynthetic process	GO:0018130	174	1.28	0.000939	0.039
Negative regulation of cellular process	GO:0048523	977	1.28	4.3e-17	2.08e-14
Positive regulation of nitrogen compound metabolic process	GO:0051173	641	1.28	7.02e-11	1.52e-08
Regulation of cellular protein metabolic process	GO:0032268	550	1.28	2.47e-09	4.47e-07
Regulation of protein modification process	GO:0031399	379	1.28	7.05e-07	8.58e-05
Establishment of localization	GO:0051234	862	1.27	1.02e-13	3.01e-11
Nucleobase-containing compound metabolic process	GO:0006139	538	1.27	8.51e-09	1.39e-06
Positive regulation of cellular biosynthetic process	GO:0031328	381	1.27	2.31e-06	0.000246
Positive regulation of cellular metabolic process	GO:0031325	671	1.27	1.53e-10	3.17e-08
Positive regulation of metabolic process	GO:0009893	759	1.27	6.65e-12	1.63e-09
Regulation of cell death	GO:0010941	279	1.27	3.73e-05	0.00277
Response to abiotic stimulus	GO:0009628	172	1.27	0.00114	0.0455
RNA processing	GO:0006396	192	1.27	0.000758	0.0332
Cellular component organization	GO:0016043	1135	1.26	1.72e-17	8.92e-15
Cellular lipid metabolic process	GO:0044255	196	1.26	0.000806	0.0347
Cellular metabolic process	GO:0044237	1660	1.26	2.64e-29	3.82e-26
Chromosome organization	GO:0051276	237	1.26	0.000269	0.014
Heterocycle metabolic process	GO:0046483	561	1.26	1.82e-08	2.75e-06
Macromolecule metabolic process	GO:0043170	1355	1.26	1.01e-21	9.78e-19
Negative regulation of metabolic process	GO:0009892	605	1.26	2.11e-09	3.87e-07
Negative regulation of signal transduction	GO:0009968	234	1.26	0.000273	0.0142
Positive regulation of biosynthetic process	GO:0009891	386	1.26	2.1e-06	0.000232
Positive regulation of macromolecule metabolic process	GO:0010604	706	1.26	5.53e-11	1.21e-08
Positive regulation of nucleobase-containing compound metabolic process	GO:0045935	372	1.26	5.51e-06	0.000539
Regulation of signal transduction	GO:0009966	556	1.26	8.69e-09	1.4e-06
RNA metabolic process	GO:0016070	301	1.26	4.39e-05	0.00315
Transport	GO:0006810	826	1.26	1.44e-12	3.8e-10
Cell projection organization	GO:0030030	223	1.25	0.000583	0.0267
Cellular component organization or biogenesis	GO:0071840	1182	1.25	8.01e-18	4.3e-15
Negative regulation of cellular metabolic process	GO:0031324	521	1.25	1.19e-07	1.6e-05
Negative regulation of macromolecule biosynthetic process	GO:0010558	284	1.25	0.00012	0.00707
Negative regulation of macromolecule metabolic process	GO:0010605	557	1.25	2.56e-08	3.71e-06
Nervous system development	GO:0007399	379	1.25	6.03e-06	0.000579
Plasma membrane bounded cell projection organization	GO:0120036	216	1.25	0.000623	0.028
Positive regulation of transcription by RNA polymerase II	GO:0045944	240	1.25	0.000407	0.0197
Protein metabolic process	GO:0019538	943	1.25	1.29e-13	3.73e-11
Negative regulation of biosynthetic process	GO:0009890	297	1.24	0.000119	0.00709
Negative regulation of cell communication	GO:0010648	244	1.24	0.000524	0.0247
Negative regulation of cellular biosynthetic process	GO:0031327	293	1.24	0.00014	0.00805
Negative regulation of cellular macromolecule biosynthetic process	GO:2000113	273	1.24	0.000227	0.0122
Negative regulation of gene expression	GO:0010629	360	1.24	2.32e-05	0.00183
Negative regulation of molecular function	GO:0044092	230	1.24	0.000604	0.0274
Negative regulation of nucleobase-containing compound metabolic process	GO:0045934	289	1.24	0.000121	0.0071
Negative regulation of signaling	GO:0023057	245	1.24	0.000455	0.0218
Organic substance metabolic process	GO:0071704	1713	1.24	7.27e-26	8.77e-23
Oxidation-reduction process	GO:0055114	238	1.24	0.000542	0.0254
Positive regulation of nucleic acid-templated transcription	GO:1903508	315	1.24	7.55e-05	0.00491
Positive regulation of RNA biosynthetic process	GO:1902680	315	1.24	7.55e-05	0.00493
Positive regulation of RNA metabolic process	GO:0051254	332	1.24	6.07e-05	0.00413
Cellular aromatic compound metabolic process	GO:0006725	564	1.23	2.77e-07	3.58e-05
Localization	GO:0051179	1095	1.23	1.45e-14	5.01e-12
Metabolic process	GO:0008152	1862	1.23	1.33e-27	1.75e-24
Negative regulation of protein metabolic process	GO:0051248	221	1.23	0.00122	0.0482
Nitrogen compound metabolic process	GO:0006807	1477	1.23	1.31e-20	1.12e-17
Organic cyclic compound metabolic process	GO:1901360	601	1.23	1.38e-07	1.82e-05
Organonitrogen compound metabolic process	GO:1901564	1132	1.23	1.12e-14	3.97e-12
Positive regulation of catalytic activity	GO:0043085	258	1.23	0.000579	0.0266
Positive regulation of molecular function	GO:0044093	325	1.23	9.75e-05	0.00612
Positive regulation of protein modification process	GO:0031401	232	1.23	0.00113	0.0449
Primary metabolic process	GO:0044238	1604	1.23	1.15e-22	1.19e-19
Regulation of cell communication	GO:0010646	608	1.23	1.03e-07	1.4e-05
Regulation of programmed cell death	GO:0043067	249	1.23	0.000675	0.03
Regulation of response to stimulus	GO:0048583	714	1.23	6.89e-09	1.16e-06
Regulation of transport	GO:0051049	305	1.23	0.000167	0.00931
Negative regulation of nitrogen compound metabolic process	GO:0051172	471	1.22	5.57e-06	0.000541
Negative regulation of RNA metabolic process	GO:0051253	262	1.22	0.000601	0.0273
Positive regulation of gene expression	GO:0010628	427	1.22	2.27e-05	0.00181
Positive regulation of transcription, DNA-templated	GO:0045893	295	1.22	0.000361	0.0179
Regulation of signaling	GO:0023051	608	1.22	1.78e-07	2.32e-05
Regulation of cellular macromolecule biosynthetic process	GO:2000112	761	1.21	1.03e-08	1.64e-06
Regulation of macromolecule biosynthetic process	GO:0010556	777	1.21	7.28e-09	1.21e-06
Regulation of macromolecule metabolic process	GO:0060255	1292	1.21	1.5e-15	6.03e-13
Regulation of metabolic process	GO:0019222	1380	1.21	3.07e-16	1.35e-13
Regulation of nitrogen compound metabolic process	GO:0051171	1177	1.21	1.43e-13	4.07e-11
Regulation of primary metabolic process	GO:0080090	1208	1.21	3.35e-14	1.06e-11
Cell differentiation	GO:0030154	602	1.2	2.32e-06	0.000245
Cellular developmental process	GO:0048869	615	1.2	1.21e-06	0.000142
Positive regulation of biological process	GO:0048518	1152	1.2	8.15e-12	1.97e-09
Positive regulation of signal transduction	GO:0009967	273	1.2	0.00114	0.0454
Regulation of biosynthetic process	GO:0009889	803	1.2	3.84e-08	5.4e-06
Regulation of cellular biosynthetic process	GO:0031326	796	1.2	1.88e-08	2.81e-06
Regulation of cellular metabolic process	GO:0031323	1244	1.2	8.78e-14	2.65e-11
Regulation of gene expression	GO:0010468	928	1.2	8.41e-10	1.58e-07
Regulation of localization	GO:0032879	495	1.2	1.64e-05	0.00137
Regulation of molecular function	GO:0065009	573	1.2	4.07e-06	0.00041
Regulation of nucleobase-containing compound metabolic process	GO:0019219	783	1.2	2.04e-08	3.02e-06
Cellular component assembly	GO:0022607	455	1.19	6.29e-05	0.00424
Cellular component biogenesis	GO:0044085	510	1.19	2.5e-05	0.00194
Positive regulation of cellular process	GO:0048522	1050	1.19	3.09e-10	6.21e-08
Regulation of developmental process	GO:0050793	433	1.19	0.000154	0.00871
Regulation of transcription by RNA polymerase II	GO:0006357	492	1.19	5.78e-05	0.00397
Biosynthetic process	GO:0009058	515	1.18	6.28e-05	0.00425
Developmental process	GO:0032502	955	1.18	2.28e-08	3.33e-06
Regulation of catalytic activity	GO:0050790	443	1.18	0.000148	0.0085
Regulation of RNA metabolic process	GO:0051252	723	1.18	1.01e-06	0.000121
Cellular biosynthetic process	GO:0044249	483	1.17	0.000198	0.0108
Organic substance biosynthetic process	GO:1901576	495	1.17	0.000246	0.013
Regulation of multicellular organismal process	GO:0051239	454	1.17	0.000324	0.0162
Regulation of nucleic acid-templated transcription	GO:1903506	658	1.17	1.68e-05	0.00139
Regulation of RNA biosynthetic process	GO:2001141	658	1.17	1.75e-05	0.00143
Regulation of transcription, DNA-templated	GO:0006355	646	1.17	2.41e-05	0.00187
System development	GO:0048731	715	1.17	5.61e-06	0.000542
Anatomical structure development	GO:0048856	869	1.16	2.27e-06	0.000246
Cellular nitrogen compound metabolic process	GO:0034641	660	1.16	2.85e-05	0.00217
Gene expression	GO:0010467	416	1.16	0.00128	0.0498
Multicellular organism development	GO:0007275	789	1.16	7.27e-06	0.000684
Regulation of biological quality	GO:0065008	701	1.16	2.06e-05	0.00167
Animal organ development	GO:0048513	524	1.14	0.000727	0.0321
Cellular process	GO:0009987	3194	1.09	2.68e-17	1.34e-14
Biological regulation	GO:0065007	2402	1.06	1.52e-05	0.00127
Biological_process	GO:0008150	3722	1.06	5.17e-20	3.94e-17
Regulation of biological process	GO:0050789	2250	1.06	6.77e-05	0.00452
