# Supplementary material for: RNA-Seq Implies Divergent Regulation Patterns of LincRNA on Spermatogenesis and Testis Growth in Goats
Source: Animals (Basel). 2021 Feb 26;11(3):625. doi: 10.3390/ani11030625 (PMC7996862; doi:10.3390/ani11030625)
Supplement: Supplementary file 1 [file animals-11-00625-s001.zip › Table S9.xlsx]

## Sheet: Table S9
LincRNA	ki	Module	Feature
ENSCHIT00000000777	1	LM1	Hub lincRNA in Figure 4C
ENSCHIT00000001289	0.989271	LM1	Hub lincRNA in Figure 4C
ENSCHIT00000011188	0.989271	LM1	Hub lincRNA in Figure 4C
ENSCHIT00000005076	0.810796	LM1	Hub lincRNA in Figure 4C
ENSCHIT00000002069	0.800481	LM1	Hub lincRNA in Figure 4C
ENSCHIT00000007414	0.757954	LM1	1 in Figure 4C
TCONS_00078498	0.72636	LM1	2 in Figure 4C
TCONS_00319548	0.670143	LM1	3 in Figure 4C
ENSCHIT00000005364	0.656805	LM1	4 in Figure 4C
TCONS_00014930	0.6376	LM1	5 in Figure 4C
ENSCHIT00000005075	0.624753	LM1	6 in Figure 4C
ENSCHIT00000003365	0.608027	LM1	7 in Figure 4C
ENSCHIT00000007374	0.608027	LM1	8 in Figure 4C
ENSCHIT00000011042	0.608027	LM1	9 in Figure 4C
TCONS_00279763	0.608027	LM1	10 in Figure 4C
TCONS_00281744	0.608027	LM1	11 in Figure 4C
TCONS_00331522	0.608027	LM1	12 in Figure 4C
TCONS_00105630	0.60572	LM1	13 in Figure 4C
TCONS_00309905	0.588538	LM1	not shown in Figure 4C
ENSCHIT00000010581	0.581207	LM1	not shown in Figure 4C
TCONS_00280515	0.553013	LM1	not shown in Figure 4C
TCONS_00183792	0.54568	LM1	not shown in Figure 4C
ENSCHIT00000009881	0.536727	LM1	not shown in Figure 4C
TCONS_00104796	0.522876	LM1	not shown in Figure 4C
ENSCHIT00000009640	0.467576	LM1	not shown in Figure 4C
ENSCHIT00000003096	0.453745	LM1	not shown in Figure 4C
ENSCHIT00000009178	0.448925	LM1	not shown in Figure 4C
TCONS_00323601	0.447759	LM1	not shown in Figure 4C
TCONS_00114291	0.44732	LM1	not shown in Figure 4C
TCONS_00319522	0.443286	LM1	not shown in Figure 4C
ENSCHIT00000007897	0.440272	LM1	not shown in Figure 4C
TCONS_00114339	0.439095	LM1	not shown in Figure 4C
TCONS_00067031	0.438305	LM1	not shown in Figure 4C
ENSCHIT00000007906	0.431782	LM1	not shown in Figure 4C
ENSCHIT00000006940	0.42785	LM1	not shown in Figure 4C
ENSCHIT00000005446	0.427835	LM1	not shown in Figure 4C
ENSCHIT00000006969	0.411452	LM1	not shown in Figure 4C
TCONS_00324902	0.408168	LM1	not shown in Figure 4C
TCONS_00319543	0.407987	LM1	not shown in Figure 4C
TCONS_00034550	0.401432	LM1	not shown in Figure 4C
ENSCHIT00000007891	0.39629	LM1	not shown in Figure 4C
ENSCHIT00000005742	0.381651	LM1	not shown in Figure 4C
TCONS_00264754	0.371741	LM1	not shown in Figure 4C
ENSCHIT00000008069	0.361846	LM1	not shown in Figure 4C
ENSCHIT00000010847	0.357606	LM1	not shown in Figure 4C
ENSCHIT00000002459	0.344863	LM1	not shown in Figure 4C
ENSCHIT00000002367	0.339214	LM1	not shown in Figure 4C
TCONS_00147634	0.337612	LM1	not shown in Figure 4C
TCONS_00277455	0.31691	LM1	not shown in Figure 4C
ENSCHIT00000002604	0.303562	LM1	not shown in Figure 4C
ENSCHIT00000010547	0.29753	LM1	not shown in Figure 4C
TCONS_00203514	0.295141	LM1	not shown in Figure 4C
TCONS_00012489	0.274883	LM1	not shown in Figure 4C
TCONS_00012317	0.263639	LM1	not shown in Figure 4C
TCONS_00243286	0.263252	LM1	not shown in Figure 4C
ENSCHIT00000004799	0.257722	LM1	not shown in Figure 4C
ENSCHIT00000005622	0.256007	LM1	not shown in Figure 4C
ENSCHIT00000011016	0.253741	LM1	not shown in Figure 4C
TCONS_00230083	0.248768	LM1	not shown in Figure 4C
ENSCHIT00000003386	0.247479	LM1	not shown in Figure 4C
ENSCHIT00000002233	0.205749	LM1	not shown in Figure 4C
ENSCHIT00000005329	0.205066	LM1	not shown in Figure 4C
ENSCHIT00000009497	0.196707	LM1	not shown in Figure 4C
TCONS_00311534	0.195198	LM1	not shown in Figure 4C
ENSCHIT00000002464	0.194809	LM1	not shown in Figure 4C
TCONS_00096975	0.18454	LM1	not shown in Figure 4C
TCONS_00146064	0.176451	LM1	not shown in Figure 4C
TCONS_00138249	0.174322	LM1	not shown in Figure 4C
TCONS_00360271	0.172316	LM1	not shown in Figure 4C
TCONS_00133709	0.152535	LM1	not shown in Figure 4C
ENSCHIT00000001914	0.152444	LM1	not shown in Figure 4C
ENSCHIT00000007082	0.152198	LM1	not shown in Figure 4C
TCONS_00090518	0.147964	LM1	not shown in Figure 4C
ENSCHIT00000004994	0.145656	LM1	not shown in Figure 4C
ENSCHIT00000009813	0.145274	LM1	not shown in Figure 4C
ENSCHIT00000010215	0.136804	LM1	not shown in Figure 4C
ENSCHIT00000004917	0.13576	LM1	not shown in Figure 4C
ENSCHIT00000009854	0.126617	LM1	not shown in Figure 4C
ENSCHIT00000010792	0.124105	LM1	not shown in Figure 4C
ENSCHIT00000005475	0.120065	LM1	not shown in Figure 4C
ENSCHIT00000002721	0.119817	LM1	not shown in Figure 4C
TCONS_00202267	0.112853	LM1	not shown in Figure 4C
ENSCHIT00000010753	0.10762	LM1	not shown in Figure 4C
TCONS_00224497	0.104199	LM1	not shown in Figure 4C
ENSCHIT00000006965	0.100368	LM1	not shown in Figure 4C
TCONS_00296705	0.099806	LM1	not shown in Figure 4C
ENSCHIT00000006727	0.0986867	LM1	not shown in Figure 4C
ENSCHIT00000002637	0.0986695	LM1	not shown in Figure 4C
TCONS_00287270	0.0978434	LM1	not shown in Figure 4C
TCONS_00183848	0.0977554	LM1	not shown in Figure 4C
TCONS_00002961	0.0938956	LM1	not shown in Figure 4C
TCONS_00212595	0.0926166	LM1	not shown in Figure 4C
ENSCHIT00000002365	0.0919431	LM1	not shown in Figure 4C
TCONS_00103503	0.0915359	LM1	not shown in Figure 4C
ENSCHIT00000010825	0.0899257	LM1	not shown in Figure 4C
ENSCHIT00000009425	0.0896561	LM1	not shown in Figure 4C
ENSCHIT00000009194	0.0894465	LM1	not shown in Figure 4C
ENSCHIT00000003381	0.0887238	LM1	not shown in Figure 4C
ENSCHIT00000009538	0.0881552	LM1	not shown in Figure 4C
ENSCHIT00000002352	0.0868958	LM1	not shown in Figure 4C
ENSCHIT00000007604	0.0851486	LM1	not shown in Figure 4C
TCONS_00174040	0.0821126	LM1	not shown in Figure 4C
ENSCHIT00000001659	0.0819077	LM1	not shown in Figure 4C
ENSCHIT00000006561	0.0808175	LM1	not shown in Figure 4C
TCONS_00301370	0.0745578	LM1	not shown in Figure 4C
ENSCHIT00000008094	0.0724489	LM1	not shown in Figure 4C
ENSCHIT00000001194	0.0723541	LM1	not shown in Figure 4C
ENSCHIT00000006546	0.0716625	LM1	not shown in Figure 4C
TCONS_00250762	0.0699284	LM1	not shown in Figure 4C
TCONS_00074323	0.0689028	LM1	not shown in Figure 4C
ENSCHIT00000001785	0.0683413	LM1	not shown in Figure 4C
ENSCHIT00000009737	0.0664825	LM1	not shown in Figure 4C
TCONS_00366553	0.0654744	LM1	not shown in Figure 4C
ENSCHIT00000011193	0.0652388	LM1	not shown in Figure 4C
TCONS_00283906	0.0640866	LM1	not shown in Figure 4C
ENSCHIT00000003825	0.0639441	LM1	not shown in Figure 4C
TCONS_00203518	0.0634484	LM1	not shown in Figure 4C
TCONS_00352088	0.062134	LM1	not shown in Figure 4C
ENSCHIT00000010290	0.0618714	LM1	not shown in Figure 4C
ENSCHIT00000006492	0.0602651	LM1	not shown in Figure 4C
TCONS_00014921	0.0593442	LM1	not shown in Figure 4C
TCONS_00205052	0.056494	LM1	not shown in Figure 4C
ENSCHIT00000005526	0.0558641	LM1	not shown in Figure 4C
ENSCHIT00000001436	0.0555861	LM1	not shown in Figure 4C
TCONS_00190667	0.054506	LM1	not shown in Figure 4C
TCONS_00203534	0.0544761	LM1	not shown in Figure 4C
ENSCHIT00000009489	0.053546	LM1	not shown in Figure 4C
TCONS_00342989	0.0521815	LM1	not shown in Figure 4C
ENSCHIT00000010986	0.0518604	LM1	not shown in Figure 4C
TCONS_00235055	0.0508342	LM1	not shown in Figure 4C
TCONS_00094750	0.0500226	LM1	not shown in Figure 4C
ENSCHIT00000008149	0.0484087	LM1	not shown in Figure 4C
TCONS_00185389	0.0482562	LM1	not shown in Figure 4C
ENSCHIT00000009499	0.0454637	LM1	not shown in Figure 4C
ENSCHIT00000009645	0.045395	LM1	not shown in Figure 4C
ENSCHIT00000005689	0.045213	LM1	not shown in Figure 4C
ENSCHIT00000001951	0.0447292	LM1	not shown in Figure 4C
ENSCHIT00000006600	0.0437121	LM1	not shown in Figure 4C
TCONS_00319540	0.0436353	LM1	not shown in Figure 4C
ENSCHIT00000001974	0.0426074	LM1	not shown in Figure 4C
ENSCHIT00000006819	0.0423974	LM1	not shown in Figure 4C
ENSCHIT00000006998	0.0417509	LM1	not shown in Figure 4C
TCONS_00020942	0.0409841	LM1	not shown in Figure 4C
ENSCHIT00000006028	0.0406975	LM1	not shown in Figure 4C
TCONS_00223181	0.0403941	LM1	not shown in Figure 4C
ENSCHIT00000004882	0.0383599	LM1	not shown in Figure 4C
ENSCHIT00000009140	0.0376058	LM1	not shown in Figure 4C
ENSCHIT00000007117	0.0366022	LM1	not shown in Figure 4C
TCONS_00003098	0.0358431	LM1	not shown in Figure 4C
TCONS_00359983	0.0357723	LM1	not shown in Figure 4C
TCONS_00077254	0.0317882	LM1	not shown in Figure 4C
ENSCHIT00000001510	0.0302681	LM1	not shown in Figure 4C
ENSCHIT00000002399	0.0298954	LM1	not shown in Figure 4C
TCONS_00224265	0.0298494	LM1	not shown in Figure 4C
TCONS_00253516	0.0297805	LM1	not shown in Figure 4C
ENSCHIT00000010011	0.0268226	LM1	not shown in Figure 4C
ENSCHIT00000003024	0.0265927	LM1	not shown in Figure 4C
TCONS_00017534	0.0254268	LM1	not shown in Figure 4C
TCONS_00322747	0.0253646	LM1	not shown in Figure 4C
ENSCHIT00000005332	0.0219259	LM1	not shown in Figure 4C
ENSCHIT00000006990	0.0188213	LM1	not shown in Figure 4C
ENSCHIT00000002318	0.0170081	LM1	not shown in Figure 4C
ENSCHIT00000001085	0.0148371	LM1	not shown in Figure 4C
TCONS_00312753	0.0130243	LM1	not shown in Figure 4C
ENSCHIT00000005380	0.0129322	LM1	not shown in Figure 4C
ENSCHIT00000003404	0.0110326	LM1	not shown in Figure 4C
TCONS_00270464	0.0109507	LM1	not shown in Figure 4C
TCONS_00200441	1	LM2	Hub lincRNA in Figure 4D
TCONS_00000339	0.94227	LM2	Hub lincRNA in Figure 4D
TCONS_00274311	0.936678	LM2	Hub lincRNA in Figure 4D
TCONS_00307506	0.930219	LM2	Hub lincRNA in Figure 4D
TCONS_00068976	0.926333	LM2	Hub lincRNA in Figure 4D
TCONS_00061156	0.924955	LM2	Hub lincRNA in Figure 4D
TCONS_00072073	0.922026	LM2	Hub lincRNA in Figure 4D
TCONS_00045517	0.891065	LM2	Hub lincRNA in Figure 4D
TCONS_00224719	0.888512	LM2	Hub lincRNA in Figure 4D
TCONS_00351678	0.887656	LM2	Hub lincRNA in Figure 4D
TCONS_00016126	0.878503	LM2	Hub lincRNA in Figure 4D
TCONS_00369376	0.875729	LM2	Hub lincRNA in Figure 4D
TCONS_00367847	0.874204	LM2	Hub lincRNA in Figure 4D
TCONS_00292368	0.865678	LM2	Hub lincRNA in Figure 4D
TCONS_00065404	0.849455	LM2	Hub lincRNA in Figure 4D
TCONS_00253123	0.84889	LM2	Hub lincRNA in Figure 4D
TCONS_00112486	0.835248	LM2	Hub lincRNA in Figure 4D
TCONS_00194853	0.830108	LM2	Hub lincRNA in Figure 4D
TCONS_00178135	0.826246	LM2	Hub lincRNA in Figure 4D
TCONS_00044395	0.821368	LM2	Hub lincRNA in Figure 4D
TCONS_00094245	0.81744	LM2	Hub lincRNA in Figure 4D
TCONS_00006206	0.815748	LM2	Hub lincRNA in Figure 4D
TCONS_00049991	0.80647	LM2	Hub lincRNA in Figure 4D
TCONS_00349640	0.802456	LM2	Hub lincRNA in Figure 4D
TCONS_00069246	0.80136	LM2	Hub lincRNA in Figure 4D
TCONS_00004090	0.800792	LM2	Hub lincRNA in Figure 4D
TCONS_00100199	0.795197	LM2	1 in Figure 4D
TCONS_00163905	0.783351	LM2	2 in Figure 4D
TCONS_00052974	0.774195	LM2	3 in Figure 4D
TCONS_00259456	0.773423	LM2	4 in Figure 4D
TCONS_00368720	0.769057	LM2	5 in Figure 4D
TCONS_00077065	0.766858	LM2	6 in Figure 4D
TCONS_00364838	0.765482	LM2	7 in Figure 4D
TCONS_00052065	0.757164	LM2	8 in Figure 4D
TCONS_00170324	0.756443	LM2	9 in Figure 4D
TCONS_00081488	0.754009	LM2	10 in Figure 4D
TCONS_00015272	0.752737	LM2	11 in Figure 4D
TCONS_00207615	0.752563	LM2	12 in Figure 4D
TCONS_00086284	0.740703	LM2	13 in Figure 4D
TCONS_00005605	0.739313	LM2	14 in Figure 4D
TCONS_00324383	0.730907	LM2	15 in Figure 4D
TCONS_00183924	0.725695	LM2	16 in Figure 4D
TCONS_00114735	0.719902	LM2	17 in Figure 4D
TCONS_00307100	0.714958	LM2	18 in Figure 4D
TCONS_00168995	0.712597	LM2	19 in Figure 4D
TCONS_00020152	0.711018	LM2	20 in Figure 4D
TCONS_00163010	0.706367	LM2	21 in Figure 4D
TCONS_00201162	0.700158	LM2	22 in Figure 4D
TCONS_00216770	0.697018	LM2	23 in Figure 4D
TCONS_00314627	0.696962	LM2	not shown in Figure 4D
TCONS_00242196	0.695224	LM2	not shown in Figure 4D
TCONS_00144063	0.693018	LM2	not shown in Figure 4D
TCONS_00366091	0.692911	LM2	not shown in Figure 4D
TCONS_00082917	0.691649	LM2	not shown in Figure 4D
TCONS_00316997	0.687187	LM2	not shown in Figure 4D
TCONS_00347541	0.68696	LM2	not shown in Figure 4D
TCONS_00324939	0.680075	LM2	not shown in Figure 4D
TCONS_00046856	0.675949	LM2	not shown in Figure 4D
TCONS_00150312	0.673514	LM2	not shown in Figure 4D
TCONS_00075749	0.668328	LM2	not shown in Figure 4D
TCONS_00075011	0.663943	LM2	not shown in Figure 4D
TCONS_00160076	0.662009	LM2	not shown in Figure 4D
TCONS_00203488	0.658661	LM2	not shown in Figure 4D
TCONS_00154403	0.654103	LM2	not shown in Figure 4D
TCONS_00101920	0.65242	LM2	not shown in Figure 4D
TCONS_00077726	0.648699	LM2	not shown in Figure 4D
TCONS_00254832	0.639695	LM2	not shown in Figure 4D
TCONS_00353877	0.637925	LM2	not shown in Figure 4D
TCONS_00277542	0.636864	LM2	not shown in Figure 4D
TCONS_00338726	0.634952	LM2	not shown in Figure 4D
TCONS_00181947	0.631132	LM2	not shown in Figure 4D
TCONS_00077671	0.627442	LM2	not shown in Figure 4D
TCONS_00003187	0.624968	LM2	not shown in Figure 4D
TCONS_00308467	0.62389	LM2	not shown in Figure 4D
TCONS_00226994	0.620619	LM2	not shown in Figure 4D
TCONS_00299489	0.619056	LM2	not shown in Figure 4D
TCONS_00345408	0.611913	LM2	not shown in Figure 4D
TCONS_00113401	0.610592	LM2	not shown in Figure 4D
TCONS_00336453	0.609734	LM2	not shown in Figure 4D
TCONS_00264268	0.609188	LM2	not shown in Figure 4D
TCONS_00240456	0.608675	LM2	not shown in Figure 4D
TCONS_00154447	0.604238	LM2	not shown in Figure 4D
TCONS_00309855	0.603247	LM2	not shown in Figure 4D
TCONS_00119931	0.602955	LM2	not shown in Figure 4D
TCONS_00096829	0.600839	LM2	not shown in Figure 4D
TCONS_00004212	0.588639	LM2	not shown in Figure 4D
TCONS_00119382	0.586544	LM2	not shown in Figure 4D
TCONS_00174059	0.586256	LM2	not shown in Figure 4D
TCONS_00054860	0.586028	LM2	not shown in Figure 4D
TCONS_00247314	0.585096	LM2	not shown in Figure 4D
TCONS_00303869	0.583676	LM2	not shown in Figure 4D
TCONS_00308740	0.581719	LM2	not shown in Figure 4D
TCONS_00254063	0.580307	LM2	not shown in Figure 4D
TCONS_00234186	0.580178	LM2	not shown in Figure 4D
TCONS_00211494	0.574179	LM2	not shown in Figure 4D
TCONS_00348381	0.572351	LM2	not shown in Figure 4D
TCONS_00179458	0.57158	LM2	not shown in Figure 4D
TCONS_00308799	0.568457	LM2	not shown in Figure 4D
TCONS_00094227	0.560461	LM2	not shown in Figure 4D
TCONS_00178908	0.558938	LM2	not shown in Figure 4D
TCONS_00302624	0.558341	LM2	not shown in Figure 4D
TCONS_00278973	0.555784	LM2	not shown in Figure 4D
TCONS_00003665	0.552314	LM2	not shown in Figure 4D
TCONS_00055708	0.550618	LM2	not shown in Figure 4D
TCONS_00298025	0.550261	LM2	not shown in Figure 4D
TCONS_00330292	0.548106	LM2	not shown in Figure 4D
TCONS_00325510	0.547852	LM2	not shown in Figure 4D
TCONS_00274611	0.547796	LM2	not shown in Figure 4D
TCONS_00013216	0.547663	LM2	not shown in Figure 4D
TCONS_00292694	0.544885	LM2	not shown in Figure 4D
TCONS_00311577	0.544749	LM2	not shown in Figure 4D
TCONS_00165145	0.542279	LM2	not shown in Figure 4D
TCONS_00183887	0.540889	LM2	not shown in Figure 4D
TCONS_00251258	0.53943	LM2	not shown in Figure 4D
TCONS_00085074	0.537101	LM2	not shown in Figure 4D
TCONS_00094678	0.535306	LM2	not shown in Figure 4D
TCONS_00086117	0.532669	LM2	not shown in Figure 4D
TCONS_00080149	0.52655	LM2	not shown in Figure 4D
TCONS_00307614	0.525837	LM2	not shown in Figure 4D
TCONS_00071619	0.52292	LM2	not shown in Figure 4D
TCONS_00129677	0.517077	LM2	not shown in Figure 4D
TCONS_00190583	0.516427	LM2	not shown in Figure 4D
TCONS_00375604	0.514008	LM2	not shown in Figure 4D
TCONS_00062680	0.505094	LM2	not shown in Figure 4D
TCONS_00100322	0.504471	LM2	not shown in Figure 4D
TCONS_00187538	0.501588	LM2	not shown in Figure 4D
TCONS_00354467	0.498778	LM2	not shown in Figure 4D
TCONS_00332125	0.498552	LM2	not shown in Figure 4D
TCONS_00162025	0.497149	LM2	not shown in Figure 4D
TCONS_00094246	0.492389	LM2	not shown in Figure 4D
TCONS_00116975	0.489287	LM2	not shown in Figure 4D
TCONS_00043010	0.489184	LM2	not shown in Figure 4D
TCONS_00207614	0.489061	LM2	not shown in Figure 4D
TCONS_00187946	0.486367	LM2	not shown in Figure 4D
TCONS_00113397	0.484321	LM2	not shown in Figure 4D
TCONS_00106374	0.483069	LM2	not shown in Figure 4D
TCONS_00150560	0.482632	LM2	not shown in Figure 4D
TCONS_00063235	0.478815	LM2	not shown in Figure 4D
TCONS_00192565	0.474694	LM2	not shown in Figure 4D
TCONS_00003303	0.47175	LM2	not shown in Figure 4D
TCONS_00064276	0.468789	LM2	not shown in Figure 4D
TCONS_00129673	0.468761	LM2	not shown in Figure 4D
TCONS_00352234	0.467445	LM2	not shown in Figure 4D
TCONS_00366090	0.466635	LM2	not shown in Figure 4D
TCONS_00369547	0.466017	LM2	not shown in Figure 4D
TCONS_00203848	0.465853	LM2	not shown in Figure 4D
TCONS_00280726	0.462417	LM2	not shown in Figure 4D
TCONS_00301980	0.46025	LM2	not shown in Figure 4D
TCONS_00257122	0.458442	LM2	not shown in Figure 4D
TCONS_00321271	0.447739	LM2	not shown in Figure 4D
TCONS_00132050	0.447329	LM2	not shown in Figure 4D
TCONS_00073025	0.44706	LM2	not shown in Figure 4D
TCONS_00062354	0.446528	LM2	not shown in Figure 4D
TCONS_00348124	0.44387	LM2	not shown in Figure 4D
TCONS_00215299	0.443591	LM2	not shown in Figure 4D
TCONS_00007405	0.441361	LM2	not shown in Figure 4D
TCONS_00009353	0.441126	LM2	not shown in Figure 4D
TCONS_00053364	0.440175	LM2	not shown in Figure 4D
TCONS_00128135	0.439461	LM2	not shown in Figure 4D
TCONS_00229841	0.438194	LM2	not shown in Figure 4D
TCONS_00134938	0.43429	LM2	not shown in Figure 4D
TCONS_00016221	0.432434	LM2	not shown in Figure 4D
TCONS_00288157	0.427556	LM2	not shown in Figure 4D
TCONS_00170086	0.426883	LM2	not shown in Figure 4D
TCONS_00127682	0.426088	LM2	not shown in Figure 4D
TCONS_00121056	0.424752	LM2	not shown in Figure 4D
TCONS_00027413	0.421755	LM2	not shown in Figure 4D
TCONS_00294206	0.419704	LM2	not shown in Figure 4D
TCONS_00377455	0.416285	LM2	not shown in Figure 4D
TCONS_00256017	0.415491	LM2	not shown in Figure 4D
TCONS_00334903	0.414899	LM2	not shown in Figure 4D
TCONS_00308476	0.413546	LM2	not shown in Figure 4D
TCONS_00054715	0.413036	LM2	not shown in Figure 4D
TCONS_00211912	0.41226	LM2	not shown in Figure 4D
TCONS_00302103	0.410683	LM2	not shown in Figure 4D
TCONS_00034837	0.410479	LM2	not shown in Figure 4D
TCONS_00095920	0.403801	LM2	not shown in Figure 4D
TCONS_00025097	0.401964	LM2	not shown in Figure 4D
TCONS_00337003	0.401861	LM2	not shown in Figure 4D
TCONS_00199926	0.40121	LM2	not shown in Figure 4D
TCONS_00006625	0.400363	LM2	not shown in Figure 4D
TCONS_00199981	0.398524	LM2	not shown in Figure 4D
TCONS_00224791	0.398266	LM2	not shown in Figure 4D
TCONS_00089744	0.39772	LM2	not shown in Figure 4D
TCONS_00057038	0.39506	LM2	not shown in Figure 4D
TCONS_00225939	0.392877	LM2	not shown in Figure 4D
TCONS_00204813	0.392413	LM2	not shown in Figure 4D
TCONS_00170278	0.389646	LM2	not shown in Figure 4D
TCONS_00213667	0.388316	LM2	not shown in Figure 4D
TCONS_00254431	0.387253	LM2	not shown in Figure 4D
TCONS_00082145	0.386922	LM2	not shown in Figure 4D
TCONS_00045448	0.384538	LM2	not shown in Figure 4D
TCONS_00076764	0.38369	LM2	not shown in Figure 4D
TCONS_00373333	0.383295	LM2	not shown in Figure 4D
TCONS_00160365	0.382225	LM2	not shown in Figure 4D
TCONS_00170316	0.381711	LM2	not shown in Figure 4D
TCONS_00258314	0.379472	LM2	not shown in Figure 4D
TCONS_00227932	0.379298	LM2	not shown in Figure 4D
TCONS_00258380	0.379047	LM2	not shown in Figure 4D
TCONS_00338838	0.378024	LM2	not shown in Figure 4D
TCONS_00213673	0.375883	LM2	not shown in Figure 4D
TCONS_00063352	0.375649	LM2	not shown in Figure 4D
TCONS_00169321	0.371859	LM2	not shown in Figure 4D
TCONS_00135017	0.371827	LM2	not shown in Figure 4D
TCONS_00271716	0.371388	LM2	not shown in Figure 4D
TCONS_00038342	0.369828	LM2	not shown in Figure 4D
TCONS_00282191	0.36981	LM2	not shown in Figure 4D
TCONS_00198298	0.367229	LM2	not shown in Figure 4D
TCONS_00020136	0.366553	LM2	not shown in Figure 4D
TCONS_00008320	0.365082	LM2	not shown in Figure 4D
TCONS_00116392	0.364995	LM2	not shown in Figure 4D
TCONS_00275665	0.363582	LM2	not shown in Figure 4D
TCONS_00245178	0.36297	LM2	not shown in Figure 4D
TCONS_00009892	0.362822	LM2	not shown in Figure 4D
TCONS_00062594	0.361546	LM2	not shown in Figure 4D
TCONS_00038872	0.360697	LM2	not shown in Figure 4D
TCONS_00177246	0.360418	LM2	not shown in Figure 4D
TCONS_00363845	0.359761	LM2	not shown in Figure 4D
TCONS_00226335	0.356785	LM2	not shown in Figure 4D
TCONS_00061722	0.356379	LM2	not shown in Figure 4D
TCONS_00072602	0.356361	LM2	not shown in Figure 4D
TCONS_00151166	0.353318	LM2	not shown in Figure 4D
TCONS_00165981	0.352595	LM2	not shown in Figure 4D
TCONS_00351969	0.351699	LM2	not shown in Figure 4D
TCONS_00221755	0.350614	LM2	not shown in Figure 4D
TCONS_00174921	0.350284	LM2	not shown in Figure 4D
TCONS_00156996	0.348205	LM2	not shown in Figure 4D
TCONS_00000242	0.343755	LM2	not shown in Figure 4D
TCONS_00008767	0.343223	LM2	not shown in Figure 4D
TCONS_00060365	0.3423	LM2	not shown in Figure 4D
TCONS_00325515	0.339082	LM2	not shown in Figure 4D
TCONS_00342708	0.338579	LM2	not shown in Figure 4D
TCONS_00303368	0.336795	LM2	not shown in Figure 4D
TCONS_00278066	0.336364	LM2	not shown in Figure 4D
TCONS_00310703	0.336012	LM2	not shown in Figure 4D
TCONS_00088438	0.335386	LM2	not shown in Figure 4D
TCONS_00068896	0.33489	LM2	not shown in Figure 4D
TCONS_00194189	0.334305	LM2	not shown in Figure 4D
TCONS_00200932	0.332815	LM2	not shown in Figure 4D
TCONS_00277417	0.332622	LM2	not shown in Figure 4D
TCONS_00020369	0.330779	LM2	not shown in Figure 4D
TCONS_00255866	0.330622	LM2	not shown in Figure 4D
TCONS_00015084	0.330507	LM2	not shown in Figure 4D
TCONS_00066790	0.33018	LM2	not shown in Figure 4D
TCONS_00130090	0.330159	LM2	not shown in Figure 4D
TCONS_00077644	0.325963	LM2	not shown in Figure 4D
TCONS_00020709	0.32552	LM2	not shown in Figure 4D
TCONS_00249416	0.324938	LM2	not shown in Figure 4D
TCONS_00196181	0.322544	LM2	not shown in Figure 4D
TCONS_00098373	0.321372	LM2	not shown in Figure 4D
TCONS_00149106	0.320846	LM2	not shown in Figure 4D
TCONS_00038126	0.319037	LM2	not shown in Figure 4D
TCONS_00227590	0.318364	LM2	not shown in Figure 4D
TCONS_00086159	0.318038	LM2	not shown in Figure 4D
TCONS_00240430	0.317844	LM2	not shown in Figure 4D
TCONS_00329141	0.317382	LM2	not shown in Figure 4D
TCONS_00176626	0.315949	LM2	not shown in Figure 4D
TCONS_00100393	0.315853	LM2	not shown in Figure 4D
TCONS_00084247	0.315547	LM2	not shown in Figure 4D
TCONS_00272896	0.315361	LM2	not shown in Figure 4D
TCONS_00090453	0.31424	LM2	not shown in Figure 4D
TCONS_00149127	0.31399	LM2	not shown in Figure 4D
TCONS_00111302	0.312117	LM2	not shown in Figure 4D
TCONS_00188908	0.311452	LM2	not shown in Figure 4D
TCONS_00002643	0.311403	LM2	not shown in Figure 4D
TCONS_00083129	0.311312	LM2	not shown in Figure 4D
TCONS_00318528	0.309137	LM2	not shown in Figure 4D
TCONS_00269320	0.308881	LM2	not shown in Figure 4D
TCONS_00019255	0.307822	LM2	not shown in Figure 4D
TCONS_00269799	0.306926	LM2	not shown in Figure 4D
TCONS_00088689	0.306387	LM2	not shown in Figure 4D
TCONS_00345836	0.306102	LM2	not shown in Figure 4D
TCONS_00040798	0.306005	LM2	not shown in Figure 4D
TCONS_00158463	0.305979	LM2	not shown in Figure 4D
TCONS_00335171	0.305319	LM2	not shown in Figure 4D
TCONS_00332727	0.303537	LM2	not shown in Figure 4D
TCONS_00206649	0.301922	LM2	not shown in Figure 4D
TCONS_00352767	0.301246	LM2	not shown in Figure 4D
TCONS_00239428	0.297852	LM2	not shown in Figure 4D
TCONS_00072606	0.296865	LM2	not shown in Figure 4D
TCONS_00248056	0.296068	LM2	not shown in Figure 4D
TCONS_00061419	0.295564	LM2	not shown in Figure 4D
TCONS_00066370	0.295473	LM2	not shown in Figure 4D
TCONS_00198494	0.295279	LM2	not shown in Figure 4D
TCONS_00298096	0.295165	LM2	not shown in Figure 4D
TCONS_00251176	0.291811	LM2	not shown in Figure 4D
TCONS_00247259	0.291696	LM2	not shown in Figure 4D
TCONS_00168436	0.29143	LM2	not shown in Figure 4D
TCONS_00244388	0.290855	LM2	not shown in Figure 4D
TCONS_00059363	0.290161	LM2	not shown in Figure 4D
TCONS_00297109	0.289479	LM2	not shown in Figure 4D
TCONS_00204226	0.287928	LM2	not shown in Figure 4D
TCONS_00255990	0.287637	LM2	not shown in Figure 4D
TCONS_00130545	0.286376	LM2	not shown in Figure 4D
TCONS_00331285	0.286204	LM2	not shown in Figure 4D
TCONS_00147608	0.284815	LM2	not shown in Figure 4D
TCONS_00215296	0.283644	LM2	not shown in Figure 4D
TCONS_00194589	0.28347	LM2	not shown in Figure 4D
TCONS_00146729	0.282514	LM2	not shown in Figure 4D
TCONS_00325572	0.281233	LM2	not shown in Figure 4D
TCONS_00276977	0.281232	LM2	not shown in Figure 4D
TCONS_00126511	0.281202	LM2	not shown in Figure 4D
TCONS_00204099	0.280978	LM2	not shown in Figure 4D
TCONS_00300174	0.280096	LM2	not shown in Figure 4D
TCONS_00245055	0.279785	LM2	not shown in Figure 4D
TCONS_00166391	0.279558	LM2	not shown in Figure 4D
TCONS_00137899	0.279089	LM2	not shown in Figure 4D
TCONS_00332326	0.278546	LM2	not shown in Figure 4D
TCONS_00340789	0.278114	LM2	not shown in Figure 4D
TCONS_00283001	0.276732	LM2	not shown in Figure 4D
TCONS_00107244	0.276728	LM2	not shown in Figure 4D
TCONS_00067760	0.275978	LM2	not shown in Figure 4D
TCONS_00196937	0.27595	LM2	not shown in Figure 4D
TCONS_00077346	0.273635	LM2	not shown in Figure 4D
TCONS_00001441	0.273006	LM2	not shown in Figure 4D
TCONS_00257774	0.272918	LM2	not shown in Figure 4D
TCONS_00065669	0.271684	LM2	not shown in Figure 4D
TCONS_00031526	0.270293	LM2	not shown in Figure 4D
TCONS_00230406	0.26987	LM2	not shown in Figure 4D
TCONS_00312194	0.269591	LM2	not shown in Figure 4D
TCONS_00033684	0.267966	LM2	not shown in Figure 4D
TCONS_00303394	0.266571	LM2	not shown in Figure 4D
TCONS_00159926	0.265963	LM2	not shown in Figure 4D
TCONS_00330429	0.265433	LM2	not shown in Figure 4D
TCONS_00272761	0.26263	LM2	not shown in Figure 4D
TCONS_00053737	0.260951	LM2	not shown in Figure 4D
TCONS_00325533	0.258702	LM2	not shown in Figure 4D
TCONS_00112346	0.256996	LM2	not shown in Figure 4D
TCONS_00205389	0.256827	LM2	not shown in Figure 4D
TCONS_00278097	0.254845	LM2	not shown in Figure 4D
TCONS_00048173	0.254017	LM2	not shown in Figure 4D
TCONS_00187495	0.25395	LM2	not shown in Figure 4D
TCONS_00228685	0.253798	LM2	not shown in Figure 4D
TCONS_00157149	0.253548	LM2	not shown in Figure 4D
TCONS_00196008	0.25311	LM2	not shown in Figure 4D
TCONS_00134852	0.251067	LM2	not shown in Figure 4D
TCONS_00113014	0.250919	LM2	not shown in Figure 4D
TCONS_00034065	0.250061	LM2	not shown in Figure 4D
TCONS_00336124	0.249943	LM2	not shown in Figure 4D
TCONS_00248696	0.249275	LM2	not shown in Figure 4D
TCONS_00113034	0.248942	LM2	not shown in Figure 4D
TCONS_00123167	0.24807	LM2	not shown in Figure 4D
TCONS_00026807	0.247838	LM2	not shown in Figure 4D
TCONS_00029100	0.247672	LM2	not shown in Figure 4D
TCONS_00165700	0.247018	LM2	not shown in Figure 4D
TCONS_00263467	0.246169	LM2	not shown in Figure 4D
TCONS_00016891	0.245992	LM2	not shown in Figure 4D
TCONS_00225513	0.245845	LM2	not shown in Figure 4D
TCONS_00087034	0.243241	LM2	not shown in Figure 4D
TCONS_00069047	0.24219	LM2	not shown in Figure 4D
TCONS_00352787	0.242064	LM2	not shown in Figure 4D
TCONS_00177201	0.241668	LM2	not shown in Figure 4D
TCONS_00178981	0.240751	LM2	not shown in Figure 4D
TCONS_00066105	0.240485	LM2	not shown in Figure 4D
TCONS_00171002	0.240383	LM2	not shown in Figure 4D
TCONS_00145862	0.239853	LM2	not shown in Figure 4D
TCONS_00224442	0.239322	LM2	not shown in Figure 4D
TCONS_00194551	0.238877	LM2	not shown in Figure 4D
TCONS_00202458	0.238772	LM2	not shown in Figure 4D
TCONS_00003455	0.23871	LM2	not shown in Figure 4D
TCONS_00021439	0.238703	LM2	not shown in Figure 4D
TCONS_00232867	0.238307	LM2	not shown in Figure 4D
TCONS_00159518	0.237013	LM2	not shown in Figure 4D
TCONS_00279105	0.236186	LM2	not shown in Figure 4D
TCONS_00099289	0.235391	LM2	not shown in Figure 4D
TCONS_00073763	0.234108	LM2	not shown in Figure 4D
TCONS_00179457	0.233682	LM2	not shown in Figure 4D
TCONS_00152523	0.232354	LM2	not shown in Figure 4D
TCONS_00069717	0.23156	LM2	not shown in Figure 4D
TCONS_00155892	0.231326	LM2	not shown in Figure 4D
TCONS_00172259	0.230881	LM2	not shown in Figure 4D
TCONS_00054944	0.230308	LM2	not shown in Figure 4D
TCONS_00231914	0.228432	LM2	not shown in Figure 4D
TCONS_00307613	0.227661	LM2	not shown in Figure 4D
TCONS_00263781	0.22603	LM2	not shown in Figure 4D
TCONS_00170318	0.225979	LM2	not shown in Figure 4D
TCONS_00187719	0.223807	LM2	not shown in Figure 4D
TCONS_00289336	0.223203	LM2	not shown in Figure 4D
TCONS_00135847	0.222213	LM2	not shown in Figure 4D
TCONS_00080147	0.219681	LM2	not shown in Figure 4D
TCONS_00217057	0.218843	LM2	not shown in Figure 4D
TCONS_00219146	0.217908	LM2	not shown in Figure 4D
TCONS_00009282	0.21771	LM2	not shown in Figure 4D
TCONS_00013456	0.217564	LM2	not shown in Figure 4D
TCONS_00225155	0.217473	LM2	not shown in Figure 4D
TCONS_00069244	0.21725	LM2	not shown in Figure 4D
TCONS_00074286	0.214474	LM2	not shown in Figure 4D
TCONS_00090440	0.21398	LM2	not shown in Figure 4D
TCONS_00077203	0.213417	LM2	not shown in Figure 4D
TCONS_00035696	0.213086	LM2	not shown in Figure 4D
TCONS_00072412	0.21119	LM2	not shown in Figure 4D
TCONS_00305372	0.210228	LM2	not shown in Figure 4D
TCONS_00203630	0.210141	LM2	not shown in Figure 4D
TCONS_00323805	0.208923	LM2	not shown in Figure 4D
TCONS_00127102	0.208449	LM2	not shown in Figure 4D
TCONS_00367605	0.207719	LM2	not shown in Figure 4D
TCONS_00021049	0.207204	LM2	not shown in Figure 4D
TCONS_00040742	0.207204	LM2	not shown in Figure 4D
TCONS_00103707	0.207204	LM2	not shown in Figure 4D
TCONS_00199648	0.207204	LM2	not shown in Figure 4D
TCONS_00139636	0.207148	LM2	not shown in Figure 4D
TCONS_00017055	0.206928	LM2	not shown in Figure 4D
TCONS_00192900	0.206838	LM2	not shown in Figure 4D
TCONS_00228701	0.205164	LM2	not shown in Figure 4D
TCONS_00323962	0.205118	LM2	not shown in Figure 4D
TCONS_00130543	0.204795	LM2	not shown in Figure 4D
TCONS_00055709	0.204715	LM2	not shown in Figure 4D
TCONS_00113325	0.203069	LM2	not shown in Figure 4D
TCONS_00091181	0.202822	LM2	not shown in Figure 4D
TCONS_00066234	0.202643	LM2	not shown in Figure 4D
TCONS_00229587	0.199182	LM2	not shown in Figure 4D
TCONS_00203456	0.199108	LM2	not shown in Figure 4D
TCONS_00183905	0.197998	LM2	not shown in Figure 4D
TCONS_00209090	0.197703	LM2	not shown in Figure 4D
TCONS_00094242	0.197264	LM2	not shown in Figure 4D
TCONS_00091232	0.197001	LM2	not shown in Figure 4D
TCONS_00077355	0.196605	LM2	not shown in Figure 4D
TCONS_00058230	0.195373	LM2	not shown in Figure 4D
TCONS_00226282	0.194913	LM2	not shown in Figure 4D
TCONS_00019481	0.194699	LM2	not shown in Figure 4D
TCONS_00147980	0.193417	LM2	not shown in Figure 4D
TCONS_00200945	0.192638	LM2	not shown in Figure 4D
TCONS_00002645	0.192313	LM2	not shown in Figure 4D
TCONS_00053864	0.19201	LM2	not shown in Figure 4D
TCONS_00084231	0.191288	LM2	not shown in Figure 4D
TCONS_00267777	0.190148	LM2	not shown in Figure 4D
TCONS_00225940	0.18971	LM2	not shown in Figure 4D
TCONS_00178728	0.189702	LM2	not shown in Figure 4D
TCONS_00167024	0.189145	LM2	not shown in Figure 4D
TCONS_00074647	0.189035	LM2	not shown in Figure 4D
TCONS_00047418	0.188402	LM2	not shown in Figure 4D
TCONS_00117078	0.187986	LM2	not shown in Figure 4D
TCONS_00124156	0.187976	LM2	not shown in Figure 4D
TCONS_00201385	0.187665	LM2	not shown in Figure 4D
TCONS_00020107	0.187586	LM2	not shown in Figure 4D
TCONS_00074648	0.18738	LM2	not shown in Figure 4D
TCONS_00068455	0.187249	LM2	not shown in Figure 4D
TCONS_00319642	0.186509	LM2	not shown in Figure 4D
TCONS_00340794	0.186459	LM2	not shown in Figure 4D
TCONS_00066099	0.185913	LM2	not shown in Figure 4D
TCONS_00027796	0.185872	LM2	not shown in Figure 4D
TCONS_00028568	0.185865	LM2	not shown in Figure 4D
TCONS_00326658	0.185035	LM2	not shown in Figure 4D
TCONS_00068975	0.184924	LM2	not shown in Figure 4D
TCONS_00044394	0.184522	LM2	not shown in Figure 4D
TCONS_00334309	0.183908	LM2	not shown in Figure 4D
TCONS_00312068	0.183601	LM2	not shown in Figure 4D
TCONS_00000241	0.181762	LM2	not shown in Figure 4D
TCONS_00152521	0.180359	LM2	not shown in Figure 4D
TCONS_00290105	0.180181	LM2	not shown in Figure 4D
TCONS_00101761	0.179565	LM2	not shown in Figure 4D
TCONS_00123171	0.179241	LM2	not shown in Figure 4D
TCONS_00288762	0.178822	LM2	not shown in Figure 4D
TCONS_00239696	0.17878	LM2	not shown in Figure 4D
TCONS_00282200	0.178414	LM2	not shown in Figure 4D
TCONS_00066434	0.178283	LM2	not shown in Figure 4D
TCONS_00103784	0.17688	LM2	not shown in Figure 4D
TCONS_00125959	0.176662	LM2	not shown in Figure 4D
TCONS_00077102	0.176511	LM2	not shown in Figure 4D
TCONS_00030645	0.175048	LM2	not shown in Figure 4D
TCONS_00055509	0.174832	LM2	not shown in Figure 4D
TCONS_00011482	0.174812	LM2	not shown in Figure 4D
TCONS_00090764	0.174782	LM2	not shown in Figure 4D
TCONS_00037562	0.173763	LM2	not shown in Figure 4D
TCONS_00138372	0.173633	LM2	not shown in Figure 4D
TCONS_00303357	0.17309	LM2	not shown in Figure 4D
TCONS_00062209	0.171073	LM2	not shown in Figure 4D
TCONS_00193978	0.170305	LM2	not shown in Figure 4D
TCONS_00068692	0.169878	LM2	not shown in Figure 4D
TCONS_00305048	0.169653	LM2	not shown in Figure 4D
TCONS_00048637	0.169026	LM2	not shown in Figure 4D
TCONS_00038244	0.168869	LM2	not shown in Figure 4D
TCONS_00306773	0.167241	LM2	not shown in Figure 4D
TCONS_00228700	0.166298	LM2	not shown in Figure 4D
TCONS_00370058	0.166103	LM2	not shown in Figure 4D
TCONS_00228711	0.166071	LM2	not shown in Figure 4D
TCONS_00291477	0.16592	LM2	not shown in Figure 4D
TCONS_00323970	0.164801	LM2	not shown in Figure 4D
TCONS_00273187	0.163864	LM2	not shown in Figure 4D
TCONS_00372839	0.162241	LM2	not shown in Figure 4D
TCONS_00085082	0.159583	LM2	not shown in Figure 4D
TCONS_00129674	0.159142	LM2	not shown in Figure 4D
TCONS_00330708	0.157453	LM2	not shown in Figure 4D
TCONS_00276577	0.157266	LM2	not shown in Figure 4D
TCONS_00079882	0.154722	LM2	not shown in Figure 4D
TCONS_00270860	0.153718	LM2	not shown in Figure 4D
TCONS_00375080	0.153223	LM2	not shown in Figure 4D
TCONS_00269951	0.152458	LM2	not shown in Figure 4D
TCONS_00227998	0.151864	LM2	not shown in Figure 4D
TCONS_00183902	0.151787	LM2	not shown in Figure 4D
TCONS_00016877	0.150772	LM2	not shown in Figure 4D
TCONS_00132616	0.150078	LM2	not shown in Figure 4D
TCONS_00325222	0.149773	LM2	not shown in Figure 4D
TCONS_00257116	0.14903	LM2	not shown in Figure 4D
TCONS_00040374	0.148892	LM2	not shown in Figure 4D
TCONS_00000807	0.148344	LM2	not shown in Figure 4D
TCONS_00083130	0.147803	LM2	not shown in Figure 4D
TCONS_00256425	0.146577	LM2	not shown in Figure 4D
TCONS_00082888	0.146574	LM2	not shown in Figure 4D
TCONS_00063333	0.145466	LM2	not shown in Figure 4D
TCONS_00300417	0.145371	LM2	not shown in Figure 4D
TCONS_00013364	0.143126	LM2	not shown in Figure 4D
TCONS_00229968	0.14221	LM2	not shown in Figure 4D
TCONS_00242490	0.141925	LM2	not shown in Figure 4D
TCONS_00353831	0.140918	LM2	not shown in Figure 4D
TCONS_00051809	0.140165	LM2	not shown in Figure 4D
TCONS_00105449	0.139661	LM2	not shown in Figure 4D
TCONS_00164311	0.138689	LM2	not shown in Figure 4D
TCONS_00351612	0.138687	LM2	not shown in Figure 4D
TCONS_00101799	0.138562	LM2	not shown in Figure 4D
TCONS_00184029	0.137746	LM2	not shown in Figure 4D
TCONS_00178037	0.137395	LM2	not shown in Figure 4D
TCONS_00179043	0.135145	LM2	not shown in Figure 4D
TCONS_00341014	0.134875	LM2	not shown in Figure 4D
TCONS_00077616	0.133387	LM2	not shown in Figure 4D
TCONS_00112738	0.133244	LM2	not shown in Figure 4D
TCONS_00126783	0.132514	LM2	not shown in Figure 4D
TCONS_00217831	0.131125	LM2	not shown in Figure 4D
TCONS_00031947	0.130767	LM2	not shown in Figure 4D
TCONS_00191985	0.130107	LM2	not shown in Figure 4D
TCONS_00049327	0.130038	LM2	not shown in Figure 4D
TCONS_00315670	0.12983	LM2	not shown in Figure 4D
TCONS_00046359	0.129033	LM2	not shown in Figure 4D
TCONS_00139628	0.128782	LM2	not shown in Figure 4D
TCONS_00300166	0.128565	LM2	not shown in Figure 4D
TCONS_00230480	0.127941	LM2	not shown in Figure 4D
TCONS_00267433	0.126289	LM2	not shown in Figure 4D
TCONS_00271142	0.125973	LM2	not shown in Figure 4D
TCONS_00198512	0.124809	LM2	not shown in Figure 4D
TCONS_00295134	0.124432	LM2	not shown in Figure 4D
TCONS_00138205	0.121806	LM2	not shown in Figure 4D
TCONS_00299822	0.120778	LM2	not shown in Figure 4D
TCONS_00110086	0.120101	LM2	not shown in Figure 4D
TCONS_00236036	0.11999	LM2	not shown in Figure 4D
TCONS_00326058	0.11949	LM2	not shown in Figure 4D
TCONS_00280603	0.119463	LM2	not shown in Figure 4D
TCONS_00083248	0.118693	LM2	not shown in Figure 4D
TCONS_00029160	0.118236	LM2	not shown in Figure 4D
TCONS_00069338	0.118006	LM2	not shown in Figure 4D
TCONS_00312436	0.117893	LM2	not shown in Figure 4D
TCONS_00025391	0.117483	LM2	not shown in Figure 4D
TCONS_00311178	0.117356	LM2	not shown in Figure 4D
TCONS_00114483	0.117267	LM2	not shown in Figure 4D
TCONS_00325493	0.11726	LM2	not shown in Figure 4D
TCONS_00179619	0.116898	LM2	not shown in Figure 4D
TCONS_00211454	0.115375	LM2	not shown in Figure 4D
TCONS_00203971	0.114624	LM2	not shown in Figure 4D
TCONS_00374189	0.114037	LM2	not shown in Figure 4D
TCONS_00370958	0.113075	LM2	not shown in Figure 4D
TCONS_00063136	0.112783	LM2	not shown in Figure 4D
TCONS_00063138	0.110953	LM2	not shown in Figure 4D
TCONS_00255569	0.1105	LM2	not shown in Figure 4D
TCONS_00372957	0.110461	LM2	not shown in Figure 4D
TCONS_00300524	0.110113	LM2	not shown in Figure 4D
TCONS_00186747	0.109914	LM2	not shown in Figure 4D
TCONS_00048017	0.10885	LM2	not shown in Figure 4D
TCONS_00373134	0.108015	LM2	not shown in Figure 4D
TCONS_00124449	0.107904	LM2	not shown in Figure 4D
TCONS_00141829	0.10739	LM2	not shown in Figure 4D
TCONS_00155694	0.106635	LM2	not shown in Figure 4D
TCONS_00248535	0.106635	LM2	not shown in Figure 4D
TCONS_00015884	0.106128	LM2	not shown in Figure 4D
TCONS_00192179	0.105168	LM2	not shown in Figure 4D
TCONS_00351940	0.10512	LM2	not shown in Figure 4D
TCONS_00010677	0.104306	LM2	not shown in Figure 4D
TCONS_00100409	0.104228	LM2	not shown in Figure 4D
TCONS_00187696	0.103253	LM2	not shown in Figure 4D
TCONS_00116705	0.102852	LM2	not shown in Figure 4D
TCONS_00215932	0.102371	LM2	not shown in Figure 4D
TCONS_00048965	0.100477	LM2	not shown in Figure 4D
TCONS_00007824	0.0998137	LM2	not shown in Figure 4D
TCONS_00110410	0.0998012	LM2	not shown in Figure 4D
TCONS_00215962	0.0984668	LM2	not shown in Figure 4D
TCONS_00169634	0.0975106	LM2	not shown in Figure 4D
TCONS_00233346	0.0968692	LM2	not shown in Figure 4D
TCONS_00147823	0.0968507	LM2	not shown in Figure 4D
TCONS_00249417	0.0957782	LM2	not shown in Figure 4D
TCONS_00155038	0.0956955	LM2	not shown in Figure 4D
TCONS_00207501	0.0956352	LM2	not shown in Figure 4D
TCONS_00279065	0.0954605	LM2	not shown in Figure 4D
TCONS_00024879	0.095251	LM2	not shown in Figure 4D
TCONS_00236038	0.0950941	LM2	not shown in Figure 4D
TCONS_00229861	0.094774	LM2	not shown in Figure 4D
TCONS_00286754	0.0947728	LM2	not shown in Figure 4D
TCONS_00089727	0.0942716	LM2	not shown in Figure 4D
TCONS_00068313	0.0942313	LM2	not shown in Figure 4D
TCONS_00176423	0.0930525	LM2	not shown in Figure 4D
TCONS_00350190	0.0928364	LM2	not shown in Figure 4D
TCONS_00215180	0.0919656	LM2	not shown in Figure 4D
TCONS_00274817	0.0916908	LM2	not shown in Figure 4D
TCONS_00043808	0.0910982	LM2	not shown in Figure 4D
TCONS_00340891	0.0908933	LM2	not shown in Figure 4D
TCONS_00175233	0.0908163	LM2	not shown in Figure 4D
TCONS_00038257	0.0907525	LM2	not shown in Figure 4D
TCONS_00349687	0.0896046	LM2	not shown in Figure 4D
TCONS_00136291	0.0878116	LM2	not shown in Figure 4D
TCONS_00337347	0.0874092	LM2	not shown in Figure 4D
TCONS_00170430	0.0861967	LM2	not shown in Figure 4D
TCONS_00004589	0.0861045	LM2	not shown in Figure 4D
TCONS_00346142	0.0858325	LM2	not shown in Figure 4D
TCONS_00276278	0.085753	LM2	not shown in Figure 4D
TCONS_00200641	0.0851883	LM2	not shown in Figure 4D
TCONS_00215926	0.0848839	LM2	not shown in Figure 4D
TCONS_00322272	0.084502	LM2	not shown in Figure 4D
TCONS_00017655	0.084223	LM2	not shown in Figure 4D
TCONS_00230663	0.0829489	LM2	not shown in Figure 4D
TCONS_00235219	0.0823141	LM2	not shown in Figure 4D
TCONS_00180115	0.0810466	LM2	not shown in Figure 4D
TCONS_00007926	0.0805026	LM2	not shown in Figure 4D
TCONS_00328768	0.0799344	LM2	not shown in Figure 4D
TCONS_00290128	0.0794492	LM2	not shown in Figure 4D
TCONS_00073036	0.0787189	LM2	not shown in Figure 4D
TCONS_00156546	0.0779577	LM2	not shown in Figure 4D
TCONS_00107250	0.0778968	LM2	not shown in Figure 4D
TCONS_00319584	0.0778436	LM2	not shown in Figure 4D
TCONS_00294336	0.0775353	LM2	not shown in Figure 4D
TCONS_00076127	0.0773948	LM2	not shown in Figure 4D
TCONS_00070162	0.0768253	LM2	not shown in Figure 4D
TCONS_00053488	0.0767359	LM2	not shown in Figure 4D
TCONS_00303228	0.0767149	LM2	not shown in Figure 4D
TCONS_00099294	0.0763978	LM2	not shown in Figure 4D
TCONS_00374124	0.0763596	LM2	not shown in Figure 4D
TCONS_00010532	0.0761377	LM2	not shown in Figure 4D
TCONS_00225956	0.0759609	LM2	not shown in Figure 4D
TCONS_00035803	0.0757272	LM2	not shown in Figure 4D
TCONS_00211130	0.0757102	LM2	not shown in Figure 4D
TCONS_00300395	0.0755451	LM2	not shown in Figure 4D
TCONS_00222308	0.0751322	LM2	not shown in Figure 4D
TCONS_00372177	0.0748284	LM2	not shown in Figure 4D
TCONS_00189938	0.0735987	LM2	not shown in Figure 4D
TCONS_00253223	0.0735984	LM2	not shown in Figure 4D
TCONS_00077344	0.0726709	LM2	not shown in Figure 4D
TCONS_00373805	0.0726456	LM2	not shown in Figure 4D
TCONS_00160357	0.0726194	LM2	not shown in Figure 4D
TCONS_00150856	0.0717749	LM2	not shown in Figure 4D
TCONS_00047341	0.0713675	LM2	not shown in Figure 4D
TCONS_00249420	0.0712157	LM2	not shown in Figure 4D
TCONS_00361866	0.0711239	LM2	not shown in Figure 4D
TCONS_00344138	0.0710653	LM2	not shown in Figure 4D
TCONS_00325010	0.0704212	LM2	not shown in Figure 4D
TCONS_00289175	0.0704098	LM2	not shown in Figure 4D
TCONS_00180211	0.0702884	LM2	not shown in Figure 4D
TCONS_00323053	0.0699047	LM2	not shown in Figure 4D
TCONS_00079358	0.0697424	LM2	not shown in Figure 4D
TCONS_00211778	0.0694827	LM2	not shown in Figure 4D
TCONS_00205262	0.0694691	LM2	not shown in Figure 4D
TCONS_00253506	0.0686549	LM2	not shown in Figure 4D
TCONS_00067325	0.0684068	LM2	not shown in Figure 4D
TCONS_00130739	0.0678281	LM2	not shown in Figure 4D
TCONS_00027418	0.067774	LM2	not shown in Figure 4D
TCONS_00121470	0.0669439	LM2	not shown in Figure 4D
TCONS_00119038	0.0669287	LM2	not shown in Figure 4D
TCONS_00077514	0.0669036	LM2	not shown in Figure 4D
TCONS_00375369	0.0663298	LM2	not shown in Figure 4D
TCONS_00000772	0.0662076	LM2	not shown in Figure 4D
TCONS_00345345	0.0658792	LM2	not shown in Figure 4D
TCONS_00094090	0.0657019	LM2	not shown in Figure 4D
TCONS_00066659	0.0641328	LM2	not shown in Figure 4D
TCONS_00333859	0.0633133	LM2	not shown in Figure 4D
TCONS_00207484	0.0625246	LM2	not shown in Figure 4D
TCONS_00211311	0.0617679	LM2	not shown in Figure 4D
TCONS_00046977	0.0614033	LM2	not shown in Figure 4D
TCONS_00107905	0.0611015	LM2	not shown in Figure 4D
TCONS_00059710	0.0608622	LM2	not shown in Figure 4D
TCONS_00303225	0.0607779	LM2	not shown in Figure 4D
TCONS_00048660	0.0603056	LM2	not shown in Figure 4D
TCONS_00290107	0.0600558	LM2	not shown in Figure 4D
TCONS_00172147	0.0597698	LM2	not shown in Figure 4D
TCONS_00179635	0.0589853	LM2	not shown in Figure 4D
TCONS_00180247	0.0589051	LM2	not shown in Figure 4D
TCONS_00125933	0.0568651	LM2	not shown in Figure 4D
TCONS_00007726	0.0568011	LM2	not shown in Figure 4D
TCONS_00183005	0.0565656	LM2	not shown in Figure 4D
TCONS_00248129	0.0562986	LM2	not shown in Figure 4D
TCONS_00224245	0.0559821	LM2	not shown in Figure 4D
TCONS_00109846	0.0555095	LM2	not shown in Figure 4D
TCONS_00292574	0.0554285	LM2	not shown in Figure 4D
TCONS_00203519	0.0552958	LM2	not shown in Figure 4D
TCONS_00082866	0.0550391	LM2	not shown in Figure 4D
TCONS_00299748	0.0545805	LM2	not shown in Figure 4D
TCONS_00157937	0.0542402	LM2	not shown in Figure 4D
TCONS_00287760	0.0529639	LM2	not shown in Figure 4D
TCONS_00239373	0.0529469	LM2	not shown in Figure 4D
TCONS_00296309	0.0525013	LM2	not shown in Figure 4D
TCONS_00247274	0.0509618	LM2	not shown in Figure 4D
TCONS_00291870	0.0502728	LM2	not shown in Figure 4D
TCONS_00072561	0.0501387	LM2	not shown in Figure 4D
TCONS_00107506	0.0498534	LM2	not shown in Figure 4D
TCONS_00153223	0.0494128	LM2	not shown in Figure 4D
TCONS_00161398	0.0487607	LM2	not shown in Figure 4D
TCONS_00035925	0.0485118	LM2	not shown in Figure 4D
TCONS_00110115	0.0483419	LM2	not shown in Figure 4D
TCONS_00126039	0.0478527	LM2	not shown in Figure 4D
TCONS_00304989	0.0478323	LM2	not shown in Figure 4D
TCONS_00048554	0.0478296	LM2	not shown in Figure 4D
TCONS_00310224	0.0477317	LM2	not shown in Figure 4D
TCONS_00157622	0.0474375	LM2	not shown in Figure 4D
TCONS_00106822	0.046611	LM2	not shown in Figure 4D
TCONS_00147025	0.0461607	LM2	not shown in Figure 4D
TCONS_00360520	0.0459553	LM2	not shown in Figure 4D
TCONS_00183398	0.0451688	LM2	not shown in Figure 4D
TCONS_00168419	0.0450905	LM2	not shown in Figure 4D
TCONS_00091783	0.0449551	LM2	not shown in Figure 4D
TCONS_00158887	0.044752	LM2	not shown in Figure 4D
TCONS_00247863	0.0446047	LM2	not shown in Figure 4D
TCONS_00066808	0.042718	LM2	not shown in Figure 4D
TCONS_00137589	0.0426669	LM2	not shown in Figure 4D
TCONS_00071337	0.0424821	LM2	not shown in Figure 4D
TCONS_00355588	0.0422955	LM2	not shown in Figure 4D
TCONS_00178466	0.0422781	LM2	not shown in Figure 4D
TCONS_00365085	0.0419898	LM2	not shown in Figure 4D
TCONS_00217187	0.0419349	LM2	not shown in Figure 4D
TCONS_00188318	0.0414187	LM2	not shown in Figure 4D
TCONS_00288979	0.0411565	LM2	not shown in Figure 4D
TCONS_00099763	0.0410773	LM2	not shown in Figure 4D
TCONS_00232835	0.0400632	LM2	not shown in Figure 4D
TCONS_00216743	0.0397858	LM2	not shown in Figure 4D
TCONS_00138251	0.0388247	LM2	not shown in Figure 4D
TCONS_00230242	0.0385085	LM2	not shown in Figure 4D
TCONS_00227701	0.0381636	LM2	not shown in Figure 4D
TCONS_00182161	0.0376434	LM2	not shown in Figure 4D
TCONS_00111873	0.0373227	LM2	not shown in Figure 4D
TCONS_00001937	0.0371395	LM2	not shown in Figure 4D
TCONS_00043930	0.0366626	LM2	not shown in Figure 4D
TCONS_00272982	0.0365829	LM2	not shown in Figure 4D
TCONS_00096113	0.0363026	LM2	not shown in Figure 4D
TCONS_00054816	0.0362638	LM2	not shown in Figure 4D
TCONS_00366535	0.0362277	LM2	not shown in Figure 4D
TCONS_00223806	0.0356288	LM2	not shown in Figure 4D
TCONS_00034054	0.0336823	LM2	not shown in Figure 4D
TCONS_00183738	0.0333246	LM2	not shown in Figure 4D
TCONS_00274085	0.0328576	LM2	not shown in Figure 4D
TCONS_00231234	0.0326953	LM2	not shown in Figure 4D
TCONS_00088896	0.0326184	LM2	not shown in Figure 4D
TCONS_00182838	0.0324398	LM2	not shown in Figure 4D
TCONS_00173905	0.032026	LM2	not shown in Figure 4D
TCONS_00137835	0.0318261	LM2	not shown in Figure 4D
TCONS_00068785	0.0317069	LM2	not shown in Figure 4D
TCONS_00044459	0.0313251	LM2	not shown in Figure 4D
TCONS_00224515	0.031153	LM2	not shown in Figure 4D
TCONS_00298628	0.030825	LM2	not shown in Figure 4D
TCONS_00316167	0.0304695	LM2	not shown in Figure 4D
TCONS_00057759	0.0302424	LM2	not shown in Figure 4D
TCONS_00305434	0.0300115	LM2	not shown in Figure 4D
TCONS_00120660	0.0294172	LM2	not shown in Figure 4D
TCONS_00054962	0.0294149	LM2	not shown in Figure 4D
TCONS_00018952	0.0293978	LM2	not shown in Figure 4D
TCONS_00126454	0.0284549	LM2	not shown in Figure 4D
TCONS_00080677	0.0281525	LM2	not shown in Figure 4D
TCONS_00056340	0.0275958	LM2	not shown in Figure 4D
TCONS_00057211	0.0271685	LM2	not shown in Figure 4D
TCONS_00105443	0.027077	LM2	not shown in Figure 4D
TCONS_00200156	0.0264568	LM2	not shown in Figure 4D
TCONS_00301744	0.0259494	LM2	not shown in Figure 4D
TCONS_00269854	0.025447	LM2	not shown in Figure 4D
TCONS_00228639	0.0249138	LM2	not shown in Figure 4D
TCONS_00289398	0.0247542	LM2	not shown in Figure 4D
TCONS_00343659	0.0243994	LM2	not shown in Figure 4D
TCONS_00362381	0.0237252	LM2	not shown in Figure 4D
TCONS_00311123	0.0231372	LM2	not shown in Figure 4D
TCONS_00065006	0.0226782	LM2	not shown in Figure 4D
TCONS_00237848	0.0226764	LM2	not shown in Figure 4D
TCONS_00213952	0.0224603	LM2	not shown in Figure 4D
TCONS_00179047	0.0219462	LM2	not shown in Figure 4D
TCONS_00314370	0.0211871	LM2	not shown in Figure 4D
TCONS_00367984	0.0206718	LM2	not shown in Figure 4D
TCONS_00139752	0.0206334	LM2	not shown in Figure 4D
TCONS_00203465	0.0205357	LM2	not shown in Figure 4D
TCONS_00179711	0.0203399	LM2	not shown in Figure 4D
TCONS_00062770	0.0199021	LM2	not shown in Figure 4D
TCONS_00070344	0.0198898	LM2	not shown in Figure 4D
TCONS_00233817	0.0196717	LM2	not shown in Figure 4D
TCONS_00344722	0.0195799	LM2	not shown in Figure 4D
TCONS_00265442	0.0184557	LM2	not shown in Figure 4D
TCONS_00343446	0.018159	LM2	not shown in Figure 4D
TCONS_00074272	0.0171218	LM2	not shown in Figure 4D
TCONS_00250807	0.0167073	LM2	not shown in Figure 4D
TCONS_00083879	0.0164031	LM2	not shown in Figure 4D
TCONS_00377280	0.0163295	LM2	not shown in Figure 4D
TCONS_00027511	0.0161115	LM2	not shown in Figure 4D
TCONS_00253155	0.0155359	LM2	not shown in Figure 4D
TCONS_00011945	0.0153804	LM2	not shown in Figure 4D
TCONS_00186252	0.0149477	LM2	not shown in Figure 4D
TCONS_00135063	0.0147728	LM2	not shown in Figure 4D
TCONS_00016030	0.0130248	LM2	not shown in Figure 4D
TCONS_00043970	0.0121461	LM2	not shown in Figure 4D
TCONS_00330910	0.0112122	LM2	not shown in Figure 4D
TCONS_00328146	0.0112037	LM2	not shown in Figure 4D
TCONS_00162505	0.0105531	LM2	not shown in Figure 4D
TCONS_00314643	0.010434	LM2	not shown in Figure 4D
TCONS_00318015	0.0102463	LM2	not shown in Figure 4D
TCONS_00034391	0.00983838	LM2	not shown in Figure 4D
TCONS_00196079	0.00976546	LM2	not shown in Figure 4D
TCONS_00026155	0.00959985	LM2	not shown in Figure 4D
TCONS_00189836	0.00922624	LM2	not shown in Figure 4D
TCONS_00066504	0.00894443	LM2	not shown in Figure 4D
TCONS_00241505	0.00889905	LM2	not shown in Figure 4D
TCONS_00064364	0.00845152	LM2	not shown in Figure 4D
TCONS_00337736	0.00839639	LM2	not shown in Figure 4D
TCONS_00167583	0.00735125	LM2	not shown in Figure 4D
TCONS_00290121	0.00726921	LM2	not shown in Figure 4D
TCONS_00132217	0.00724696	LM2	not shown in Figure 4D
TCONS_00045396	0.00691259	LM2	not shown in Figure 4D
TCONS_00165921	0.00671958	LM2	not shown in Figure 4D
TCONS_00177996	0.00667782	LM2	not shown in Figure 4D
TCONS_00290120	0.0064739	LM2	not shown in Figure 4D
TCONS_00350506	0.00641923	LM2	not shown in Figure 4D
TCONS_00341430	0.00562685	LM2	not shown in Figure 4D
TCONS_00284705	0.00470322	LM2	not shown in Figure 4D
TCONS_00018408	0.00435182	LM2	not shown in Figure 4D
TCONS_00319577	0.00391492	LM2	not shown in Figure 4D
TCONS_00145860	0.00367575	LM2	not shown in Figure 4D
TCONS_00009219	0.00331254	LM2	not shown in Figure 4D
TCONS_00340441	0.00319478	LM2	not shown in Figure 4D
TCONS_00294694	0.00306946	LM2	not shown in Figure 4D
TCONS_00116120	0.00291169	LM2	not shown in Figure 4D
TCONS_00084369	0.00275542	LM2	not shown in Figure 4D
TCONS_00040557	0.00273907	LM2	not shown in Figure 4D
TCONS_00201433	0.00258212	LM2	not shown in Figure 4D
TCONS_00028383	0.00236168	LM2	not shown in Figure 4D
TCONS_00107867	0.00231651	LM2	not shown in Figure 4D
TCONS_00334518	0.00209523	LM2	not shown in Figure 4D
TCONS_00354119	0.00201508	LM2	not shown in Figure 4D
TCONS_00349740	0.00193387	LM2	not shown in Figure 4D
TCONS_00025521	0.00182961	LM2	not shown in Figure 4D
TCONS_00072761	0.00168882	LM2	not shown in Figure 4D
TCONS_00068798	0.00135771	LM2	not shown in Figure 4D
TCONS_00036415	0.00117356	LM2	not shown in Figure 4D
TCONS_00002489	0.00111277	LM2	not shown in Figure 4D
TCONS_00370275	0.00105888	LM2	not shown in Figure 4D
TCONS_00125349	0.0010556	LM2	not shown in Figure 4D
TCONS_00231475	0.00102011	LM2	not shown in Figure 4D
TCONS_00196696	0.00101324	LM2	not shown in Figure 4D
TCONS_00170328	0.000884684	LM2	not shown in Figure 4D
TCONS_00183875	0.000853036	LM2	not shown in Figure 4D
TCONS_00271628	0.000406896	LM2	not shown in Figure 4D
TCONS_00170227	1	LM3	not shown in Figure 4
TCONS_00063555	0.929633	LM3	not shown in Figure 4
TCONS_00223718	0.929633	LM3	not shown in Figure 4
TCONS_00040333	0.861646	LM3	not shown in Figure 4
TCONS_00033574	0.800099	LM3	not shown in Figure 4
TCONS_00282798	0.794654	LM3	not shown in Figure 4
TCONS_00350066	0.751722	LM3	not shown in Figure 4
TCONS_00179589	0.70191	LM3	not shown in Figure 4
TCONS_00186886	0.689149	LM3	not shown in Figure 4
TCONS_00344716	0.654439	LM3	not shown in Figure 4
TCONS_00111305	0.615629	LM3	not shown in Figure 4
TCONS_00335966	0.572381	LM3	not shown in Figure 4
TCONS_00241326	0.554687	LM3	not shown in Figure 4
TCONS_00019766	0.547736	LM3	not shown in Figure 4
TCONS_00111478	0.537881	LM3	not shown in Figure 4
TCONS_00159731	0.528033	LM3	not shown in Figure 4
TCONS_00139551	0.52545	LM3	not shown in Figure 4
TCONS_00069039	0.516244	LM3	not shown in Figure 4
TCONS_00243437	0.512814	LM3	not shown in Figure 4
TCONS_00147139	0.506467	LM3	not shown in Figure 4
TCONS_00337343	0.487983	LM3	not shown in Figure 4
TCONS_00077511	0.462176	LM3	not shown in Figure 4
TCONS_00190343	0.456807	LM3	not shown in Figure 4
TCONS_00169548	0.456357	LM3	not shown in Figure 4
TCONS_00368505	0.432374	LM3	not shown in Figure 4
TCONS_00115401	0.414464	LM3	not shown in Figure 4
TCONS_00373161	0.405625	LM3	not shown in Figure 4
TCONS_00229224	0.387343	LM3	not shown in Figure 4
TCONS_00221545	0.380602	LM3	not shown in Figure 4
TCONS_00102188	0.372874	LM3	not shown in Figure 4
TCONS_00051209	0.368045	LM3	not shown in Figure 4
TCONS_00222664	0.346646	LM3	not shown in Figure 4
TCONS_00336301	0.340727	LM3	not shown in Figure 4
TCONS_00079713	0.329349	LM3	not shown in Figure 4
TCONS_00018999	0.327438	LM3	not shown in Figure 4
TCONS_00114387	0.31656	LM3	not shown in Figure 4
TCONS_00224418	0.31507	LM3	not shown in Figure 4
TCONS_00083523	0.314829	LM3	not shown in Figure 4
TCONS_00315676	0.308878	LM3	not shown in Figure 4
TCONS_00295790	0.297097	LM3	not shown in Figure 4
TCONS_00099614	0.296263	LM3	not shown in Figure 4
TCONS_00163894	0.291312	LM3	not shown in Figure 4
TCONS_00020523	0.276296	LM3	not shown in Figure 4
TCONS_00030702	0.274818	LM3	not shown in Figure 4
TCONS_00223939	0.26803	LM3	not shown in Figure 4
TCONS_00319085	0.261771	LM3	not shown in Figure 4
TCONS_00280047	0.243097	LM3	not shown in Figure 4
TCONS_00158267	0.242388	LM3	not shown in Figure 4
TCONS_00255701	0.237049	LM3	not shown in Figure 4
TCONS_00305359	0.234325	LM3	not shown in Figure 4
TCONS_00153229	0.224859	LM3	not shown in Figure 4
TCONS_00257278	0.218841	LM3	not shown in Figure 4
TCONS_00221769	0.193723	LM3	not shown in Figure 4
TCONS_00148080	0.188435	LM3	not shown in Figure 4
TCONS_00243753	0.186775	LM3	not shown in Figure 4
TCONS_00269905	0.175095	LM3	not shown in Figure 4
TCONS_00238805	0.173377	LM3	not shown in Figure 4
TCONS_00215301	0.166878	LM3	not shown in Figure 4
TCONS_00227965	0.166562	LM3	not shown in Figure 4
TCONS_00091422	0.164097	LM3	not shown in Figure 4
TCONS_00074028	0.152414	LM3	not shown in Figure 4
TCONS_00087718	0.144577	LM3	not shown in Figure 4
TCONS_00161515	0.137847	LM3	not shown in Figure 4
TCONS_00073045	0.136153	LM3	not shown in Figure 4
TCONS_00267172	0.125829	LM3	not shown in Figure 4
TCONS_00085143	0.112949	LM3	not shown in Figure 4
TCONS_00026138	0.112699	LM3	not shown in Figure 4
TCONS_00217885	0.107048	LM3	not shown in Figure 4
TCONS_00265472	0.103979	LM3	not shown in Figure 4
TCONS_00254009	0.103053	LM3	not shown in Figure 4
TCONS_00217435	0.100447	LM3	not shown in Figure 4
TCONS_00225216	0.0988322	LM3	not shown in Figure 4
TCONS_00194674	0.0970435	LM3	not shown in Figure 4
TCONS_00229811	0.0845992	LM3	not shown in Figure 4
TCONS_00020100	0.0783627	LM3	not shown in Figure 4
TCONS_00340185	0.066468	LM3	not shown in Figure 4
TCONS_00332353	0.0338002	LM3	not shown in Figure 4
TCONS_00135304	0.027838	LM3	not shown in Figure 4
TCONS_00043078	0.023238	LM3	not shown in Figure 4
TCONS_00234252	0.00688976	LM3	not shown in Figure 4
TCONS_00032069	1	LM4	not shown in Figure 4
TCONS_00035804	1	LM4	not shown in Figure 4
TCONS_00057049	1	LM4	not shown in Figure 4
TCONS_00206718	1	LM4	not shown in Figure 4
TCONS_00226278	1	LM4	not shown in Figure 4
TCONS_00279762	1	LM4	not shown in Figure 4
TCONS_00071922	0.95367	LM4	not shown in Figure 4
TCONS_00111082	0.917673	LM4	not shown in Figure 4
TCONS_00006161	0.850118	LM4	not shown in Figure 4
TCONS_00375858	0.837409	LM4	not shown in Figure 4
TCONS_00116799	0.816598	LM4	not shown in Figure 4
TCONS_00043833	0.695713	LM4	not shown in Figure 4
TCONS_00125686	0.684361	LM4	not shown in Figure 4
TCONS_00149101	0.617108	LM4	not shown in Figure 4
TCONS_00234180	0.555905	LM4	not shown in Figure 4
TCONS_00175712	0.491006	LM4	not shown in Figure 4
TCONS_00194588	0.471029	LM4	not shown in Figure 4
TCONS_00217287	0.443568	LM4	not shown in Figure 4
TCONS_00204033	0.44289	LM4	not shown in Figure 4
TCONS_00259625	0.419784	LM4	not shown in Figure 4
TCONS_00176521	0.417694	LM4	not shown in Figure 4
TCONS_00369499	0.404159	LM4	not shown in Figure 4
TCONS_00243713	0.394236	LM4	not shown in Figure 4
TCONS_00355548	0.363255	LM4	not shown in Figure 4
TCONS_00167835	0.329822	LM4	not shown in Figure 4
TCONS_00041527	0.322332	LM4	not shown in Figure 4
TCONS_00234187	0.3153	LM4	not shown in Figure 4
TCONS_00016033	0.307638	LM4	not shown in Figure 4
TCONS_00376583	0.288077	LM4	not shown in Figure 4
TCONS_00125711	0.28003	LM4	not shown in Figure 4
TCONS_00377317	0.278273	LM4	not shown in Figure 4
TCONS_00010022	0.260183	LM4	not shown in Figure 4
TCONS_00114151	0.256895	LM4	not shown in Figure 4
TCONS_00091218	0.243608	LM4	not shown in Figure 4
TCONS_00034759	0.239598	LM4	not shown in Figure 4
TCONS_00180455	0.229598	LM4	not shown in Figure 4
TCONS_00241007	0.222561	LM4	not shown in Figure 4
TCONS_00173158	0.214642	LM4	not shown in Figure 4
TCONS_00287174	0.204352	LM4	not shown in Figure 4
TCONS_00075509	0.199149	LM4	not shown in Figure 4
TCONS_00155693	0.191308	LM4	not shown in Figure 4
TCONS_00029537	0.183788	LM4	not shown in Figure 4
TCONS_00296925	0.181869	LM4	not shown in Figure 4
TCONS_00305376	0.181629	LM4	not shown in Figure 4
TCONS_00085717	0.163145	LM4	not shown in Figure 4
TCONS_00037565	0.146114	LM4	not shown in Figure 4
TCONS_00277523	0.126695	LM4	not shown in Figure 4
TCONS_00090742	0.120946	LM4	not shown in Figure 4
TCONS_00166002	0.115332	LM4	not shown in Figure 4
TCONS_00171664	0.114611	LM4	not shown in Figure 4
TCONS_00348980	0.0875976	LM4	not shown in Figure 4
TCONS_00218263	0.0658003	LM4	not shown in Figure 4
TCONS_00051806	0.0653244	LM4	not shown in Figure 4
TCONS_00155462	0.064008	LM4	not shown in Figure 4
TCONS_00196001	0.0548586	LM4	not shown in Figure 4
TCONS_00342053	0.0287374	LM4	not shown in Figure 4
TCONS_00162458	0.0109665	LM4	not shown in Figure 4
TCONS_00012411	1	LM5	not shown in Figure 4
TCONS_00063567	1	LM5	not shown in Figure 4
TCONS_00159212	1	LM5	not shown in Figure 4
TCONS_00061862	0.991888	LM5	not shown in Figure 4
TCONS_00072631	0.893135	LM5	not shown in Figure 4
TCONS_00371240	0.659768	LM5	not shown in Figure 4
TCONS_00332244	0.622601	LM5	not shown in Figure 4
TCONS_00231077	0.590226	LM5	not shown in Figure 4
TCONS_00226686	0.567655	LM5	not shown in Figure 4
TCONS_00279999	0.553145	LM5	not shown in Figure 4
TCONS_00340911	0.549248	LM5	not shown in Figure 4
TCONS_00332620	0.536002	LM5	not shown in Figure 4
TCONS_00088526	0.526897	LM5	not shown in Figure 4
TCONS_00278845	0.519513	LM5	not shown in Figure 4
TCONS_00232083	0.512508	LM5	not shown in Figure 4
TCONS_00319874	0.511307	LM5	not shown in Figure 4
TCONS_00091479	0.503135	LM5	not shown in Figure 4
TCONS_00129633	0.480654	LM5	not shown in Figure 4
TCONS_00319365	0.472314	LM5	not shown in Figure 4
TCONS_00149174	0.456458	LM5	not shown in Figure 4
TCONS_00107843	0.427458	LM5	not shown in Figure 4
TCONS_00266519	0.416436	LM5	not shown in Figure 4
TCONS_00200571	0.412321	LM5	not shown in Figure 4
TCONS_00096683	0.40643	LM5	not shown in Figure 4
TCONS_00147447	0.399041	LM5	not shown in Figure 4
TCONS_00052217	0.3709	LM5	not shown in Figure 4
TCONS_00007663	0.368913	LM5	not shown in Figure 4
TCONS_00374187	0.365173	LM5	not shown in Figure 4
TCONS_00200189	0.33885	LM5	not shown in Figure 4
TCONS_00203058	0.331544	LM5	not shown in Figure 4
TCONS_00051064	0.331532	LM5	not shown in Figure 4
TCONS_00271289	0.321436	LM5	not shown in Figure 4
TCONS_00221684	0.308571	LM5	not shown in Figure 4
TCONS_00044012	0.290876	LM5	not shown in Figure 4
TCONS_00072060	0.287403	LM5	not shown in Figure 4
TCONS_00224240	0.286217	LM5	not shown in Figure 4
TCONS_00241604	0.275199	LM5	not shown in Figure 4
TCONS_00115197	0.275131	LM5	not shown in Figure 4
TCONS_00335813	0.242354	LM5	not shown in Figure 4
TCONS_00029287	0.242256	LM5	not shown in Figure 4
TCONS_00035761	0.241847	LM5	not shown in Figure 4
TCONS_00174158	0.236067	LM5	not shown in Figure 4
TCONS_00069481	0.234937	LM5	not shown in Figure 4
TCONS_00346959	0.233839	LM5	not shown in Figure 4
TCONS_00105854	0.225376	LM5	not shown in Figure 4
TCONS_00048236	0.220245	LM5	not shown in Figure 4
TCONS_00218187	0.204919	LM5	not shown in Figure 4
TCONS_00187125	0.196428	LM5	not shown in Figure 4
TCONS_00278898	0.16214	LM5	not shown in Figure 4
TCONS_00311381	0.160527	LM5	not shown in Figure 4
TCONS_00377658	0.145979	LM5	not shown in Figure 4
TCONS_00125497	0.145269	LM5	not shown in Figure 4
TCONS_00033113	0.1414	LM5	not shown in Figure 4
TCONS_00309027	0.114197	LM5	not shown in Figure 4
TCONS_00331677	0.107865	LM5	not shown in Figure 4
TCONS_00105124	0.105273	LM5	not shown in Figure 4
TCONS_00226074	0.103471	LM5	not shown in Figure 4
TCONS_00253658	0.0861954	LM5	not shown in Figure 4
TCONS_00152842	0.0750403	LM5	not shown in Figure 4
TCONS_00182798	0.0718809	LM5	not shown in Figure 4
TCONS_00077212	0.0700899	LM5	not shown in Figure 4
TCONS_00184336	0.0690666	LM5	not shown in Figure 4
TCONS_00118577	0.0683598	LM5	not shown in Figure 4
TCONS_00102111	0.0541687	LM5	not shown in Figure 4
TCONS_00151894	0.0467599	LM5	not shown in Figure 4
TCONS_00116968	0.0404332	LM5	not shown in Figure 4
TCONS_00302201	0.0369456	LM5	not shown in Figure 4
TCONS_00138998	0.0301921	LM5	not shown in Figure 4
TCONS_00276251	0.0258844	LM5	not shown in Figure 4
TCONS_00302105	0.0242018	LM5	not shown in Figure 4
TCONS_00212599	0.0214167	LM5	not shown in Figure 4
TCONS_00216226	0.0212364	LM5	not shown in Figure 4
TCONS_00004953	1	LM6	not shown in Figure 4
TCONS_00079720	0.948691	LM6	not shown in Figure 4
TCONS_00184832	0.948691	LM6	not shown in Figure 4
TCONS_00207333	0.948691	LM6	not shown in Figure 4
TCONS_00263376	0.948691	LM6	not shown in Figure 4
TCONS_00009004	0.932975	LM6	not shown in Figure 4
TCONS_00189314	0.907495	LM6	not shown in Figure 4
TCONS_00222316	0.878887	LM6	not shown in Figure 4
TCONS_00138361	0.852795	LM6	not shown in Figure 4
TCONS_00318637	0.813783	LM6	not shown in Figure 4
TCONS_00313997	0.717687	LM6	not shown in Figure 4
TCONS_00069213	0.6781	LM6	not shown in Figure 4
TCONS_00100379	0.577995	LM6	not shown in Figure 4
TCONS_00164012	0.546664	LM6	not shown in Figure 4
TCONS_00215783	0.506287	LM6	not shown in Figure 4
TCONS_00119890	0.495104	LM6	not shown in Figure 4
TCONS_00343482	0.469294	LM6	not shown in Figure 4
TCONS_00376338	0.466891	LM6	not shown in Figure 4
TCONS_00296516	0.466159	LM6	not shown in Figure 4
TCONS_00270209	0.446488	LM6	not shown in Figure 4
TCONS_00022186	0.43401	LM6	not shown in Figure 4
TCONS_00083258	0.425589	LM6	not shown in Figure 4
TCONS_00364715	0.415079	LM6	not shown in Figure 4
TCONS_00160882	0.414073	LM6	not shown in Figure 4
TCONS_00050166	0.404253	LM6	not shown in Figure 4
TCONS_00005606	0.357586	LM6	not shown in Figure 4
TCONS_00087671	0.352815	LM6	not shown in Figure 4
TCONS_00239513	0.344156	LM6	not shown in Figure 4
TCONS_00061302	0.340091	LM6	not shown in Figure 4
TCONS_00300521	0.321694	LM6	not shown in Figure 4
TCONS_00234745	0.313172	LM6	not shown in Figure 4
TCONS_00172131	0.286568	LM6	not shown in Figure 4
TCONS_00168620	0.239844	LM6	not shown in Figure 4
TCONS_00245565	0.23577	LM6	not shown in Figure 4
TCONS_00293396	0.229825	LM6	not shown in Figure 4
TCONS_00237006	0.219992	LM6	not shown in Figure 4
TCONS_00197017	0.215447	LM6	not shown in Figure 4
TCONS_00086083	0.194423	LM6	not shown in Figure 4
TCONS_00020313	0.18184	LM6	not shown in Figure 4
TCONS_00066874	0.150071	LM6	not shown in Figure 4
TCONS_00204507	0.127817	LM6	not shown in Figure 4
TCONS_00129157	0.108042	LM6	not shown in Figure 4
TCONS_00117631	0.101808	LM6	not shown in Figure 4
TCONS_00340782	0.0562983	LM6	not shown in Figure 4
TCONS_00214169	0.048375	LM6	not shown in Figure 4
TCONS_00097020	0.0323122	LM6	not shown in Figure 4
TCONS_00155043	0.0140701	LM6	not shown in Figure 4
TCONS_00010408	1	LM7	not shown in Figure 4
TCONS_00058781	1	LM7	not shown in Figure 4
TCONS_00185261	1	LM7	not shown in Figure 4
TCONS_00234185	1	LM7	not shown in Figure 4
TCONS_00333275	1	LM7	not shown in Figure 4
TCONS_00116717	0.94968	LM7	not shown in Figure 4
TCONS_00099198	0.830406	LM7	not shown in Figure 4
TCONS_00239302	0.701675	LM7	not shown in Figure 4
TCONS_00259582	0.700493	LM7	not shown in Figure 4
TCONS_00332445	0.665838	LM7	not shown in Figure 4
TCONS_00062753	0.661063	LM7	not shown in Figure 4
TCONS_00154401	0.558596	LM7	not shown in Figure 4
TCONS_00364641	0.537772	LM7	not shown in Figure 4
TCONS_00065581	0.477489	LM7	not shown in Figure 4
TCONS_00055577	0.477082	LM7	not shown in Figure 4
TCONS_00144588	0.475359	LM7	not shown in Figure 4
TCONS_00271881	0.439338	LM7	not shown in Figure 4
TCONS_00206657	0.419032	LM7	not shown in Figure 4
TCONS_00203336	0.396865	LM7	not shown in Figure 4
TCONS_00158438	0.387654	LM7	not shown in Figure 4
TCONS_00032505	0.377484	LM7	not shown in Figure 4
TCONS_00033425	0.361583	LM7	not shown in Figure 4
TCONS_00165042	0.352869	LM7	not shown in Figure 4
TCONS_00165639	0.33578	LM7	not shown in Figure 4
TCONS_00056557	0.332035	LM7	not shown in Figure 4
TCONS_00044411	0.330013	LM7	not shown in Figure 4
TCONS_00055573	0.299971	LM7	not shown in Figure 4
TCONS_00019894	0.282837	LM7	not shown in Figure 4
TCONS_00267003	0.269367	LM7	not shown in Figure 4
TCONS_00058059	0.262495	LM7	not shown in Figure 4
TCONS_00312840	0.241353	LM7	not shown in Figure 4
TCONS_00333902	0.221888	LM7	not shown in Figure 4
TCONS_00245087	0.211183	LM7	not shown in Figure 4
TCONS_00280789	0.183721	LM7	not shown in Figure 4
TCONS_00177049	0.183661	LM7	not shown in Figure 4
TCONS_00279103	0.176947	LM7	not shown in Figure 4
TCONS_00348673	0.167305	LM7	not shown in Figure 4
TCONS_00313665	0.16287	LM7	not shown in Figure 4
TCONS_00209399	0.155473	LM7	not shown in Figure 4
TCONS_00086754	0.148417	LM7	not shown in Figure 4
TCONS_00009078	0.142397	LM7	not shown in Figure 4
TCONS_00175175	0.128376	LM7	not shown in Figure 4
TCONS_00043106	0.123609	LM7	not shown in Figure 4
TCONS_00154591	0.11019	LM7	not shown in Figure 4
TCONS_00359374	0.0812791	LM7	not shown in Figure 4
TCONS_00129492	0.0240777	LM7	not shown in Figure 4
