# Supplementary material for: RNA-Seq Implies Divergent Regulation Patterns of LincRNA on Spermatogenesis and Testis Growth in Goats
Source: Animals (Basel). 2021 Feb 26;11(3):625. doi: 10.3390/ani11030625 (PMC7996862; doi:10.3390/ani11030625)
Supplement: Supplementary file 1 [file animals-11-00625-s001.zip › Table S10.xlsx]

## Sheet: Table S10
LincRNA	mRNA	P-value of model	Regression coefficient	P-value of regression coefficient
ENSCHIT00000003567	ENSCHIG00000000006	1.57e-178	305.474	2.7e-170
ENSCHIT00000003342	ENSCHIG00000000006	1.57e-178	3054.92	8.65e-173
ENSCHIT00000004917	ENSCHIG00000000006	1.57e-178	1655.8	3.47e-171
ENSCHIT00000002730	ENSCHIG00000000006	1.57e-178	-1748.16	2.06e-172
ENSCHIT00000001397	ENSCHIG00000000006	1.57e-178	-14650.7	2.57e-172
ENSCHIT00000008523	ENSCHIG00000000006	1.57e-178	-643.621	5.12e-169
ENSCHIT00000001790	ENSCHIG00000000006	1.57e-178	-914.984	1.68e-171
ENSCHIT00000003264	ENSCHIG00000000006	1.57e-178	-2218.56	3.72e-171
ENSCHIT00000007734	ENSCHIG00000000006	1.57e-178	-335.279	1.27e-172
ENSCHIT00000010480	ENSCHIG00000000010	5.22e-132	-7945.48	2.3e-126
ENSCHIT00000010691	ENSCHIG00000000010	5.22e-132	-13701.7	2.07e-126
ENSCHIT00000010204	ENSCHIG00000000010	5.22e-132	22022	2.11e-126
ENSCHIT00000010581	ENSCHIG00000000010	5.22e-132	5876.67	1.8e-126
ENSCHIT00000010684	ENSCHIG00000000010	5.22e-132	-43623.3	1.34e-126
ENSCHIT00000010605	ENSCHIG00000000010	5.22e-132	-69374.3	1.99e-126
ENSCHIT00000010475	ENSCHIG00000000010	5.22e-132	1535.26	1.79e-126
ENSCHIT00000010406	ENSCHIG00000000010	5.22e-132	-1576.26	6.79e-124
TCONS_00183438	ENSCHIG00000000010	5.22e-132	3433.29	8.68e-127
ENSCHIT00000003276	ENSCHIG00000000016	6.02e-10	-2083.8	0.00973472
ENSCHIT00000010018	ENSCHIG00000000016	6.02e-10	-922.401	0.0464988
TCONS_00253686	ENSCHIG00000000016	6.02e-10	118.536	0.0345073
ENSCHIT00000006965	ENSCHIG00000000019	1.81e-10	-766.439	0.000615732
ENSCHIT00000002108	ENSCHIG00000000019	1.81e-10	-2133.92	0.000782295
ENSCHIT00000001486	ENSCHIG00000000021	6.47e-09	-12574.4	6.47e-09
ENSCHIT00000001721	ENSCHIG00000000022	3.88e-108	3203.21	3.15e-98
ENSCHIT00000000929	ENSCHIG00000000022	3.88e-108	440.527	1.14e-99
ENSCHIT00000002266	ENSCHIG00000000022	3.88e-108	-19.8128	6.99e-94
ENSCHIT00000000875	ENSCHIG00000000022	3.88e-108	1149.77	4.58e-98
ENSCHIT00000001428	ENSCHIG00000000022	3.88e-108	756.839	6.99e-98
ENSCHIT00000001639	ENSCHIG00000000022	3.88e-108	-456.331	6.83e-99
TCONS_00319548	ENSCHIG00000000022	3.88e-108	-2.42e-14	0.0495518
ENSCHIT00000000955	ENSCHIG00000000022	3.88e-108	962.952	1.09e-97
ENSCHIT00000002670	ENSCHIG00000000022	3.88e-108	-1272.99	5.27e-98
ENSCHIT00000001732	ENSCHIG00000000022	3.88e-108	103.888	1.58e-96
ENSCHIT00000001111	ENSCHIG00000000023	1.46e-09	2699.31	0.00355805
TCONS_00253686	ENSCHIG00000000023	1.46e-09	68.3619	0.0432897
ENSCHIT00000010406	ENSCHIG00000000025	1.04e-175	10147.7	1.82e-168
ENSCHIT00000010878	ENSCHIG00000000025	1.04e-175	422.598	5.25e-168
ENSCHIT00000010204	ENSCHIG00000000025	1.04e-175	-532947	2.26e-163
ENSCHIT00000010743	ENSCHIG00000000025	1.04e-175	-474.21	1.39e-166
ENSCHIT00000010980	ENSCHIG00000000025	1.04e-175	5.58689e+06	2.42e-163
ENSCHIT00000010480	ENSCHIG00000000025	1.04e-175	2408.96	1.84e-167
ENSCHIT00000010605	ENSCHIG00000000025	1.04e-175	3788.86	1.2e-165
TCONS_00183438	ENSCHIG00000000025	1.04e-175	2895.06	7.1e-170
ENSCHIT00000010218	ENSCHIG00000000025	1.04e-175	192.462	3.35e-166
ENSCHIT00000003338	ENSCHIG00000000027	2.57e-14	78.2455	2e-06
ENSCHIT00000001968	ENSCHIG00000000027	2.57e-14	937.492	0.000515636
ENSCHIT00000007967	ENSCHIG00000000027	2.57e-14	-1375.41	1.2e-07
ENSCHIT00000006004	ENSCHIG00000000027	2.57e-14	115.356	7.41e-06
ENSCHIT00000010204	ENSCHIG00000000028	8.64e-160	-1455.34	9.34e-145
ENSCHIT00000010878	ENSCHIG00000000028	8.64e-160	329.397	6.5e-148
ENSCHIT00000010218	ENSCHIG00000000028	8.64e-160	280.601	3e-144
ENSCHIT00000010406	ENSCHIG00000000028	8.64e-160	2235.47	1.87e-144
ENSCHIT00000010743	ENSCHIG00000000028	8.64e-160	-42.8613	1.61e-134
TCONS_00183438	ENSCHIG00000000028	8.64e-160	2226.13	2.13e-145
TCONS_00053088	ENSCHIG00000000028	8.64e-160	7.46e-14	0.0161821
ENSCHIT00000010475	ENSCHIG00000000028	8.64e-160	-284.719	4.36e-145
ENSCHIT00000010605	ENSCHIG00000000028	8.64e-160	7501.47	1.16e-143
ENSCHIT00000010480	ENSCHIG00000000028	8.64e-160	865.316	3.85e-147
ENSCHIT00000010914	ENSCHIG00000000032	9.17e-136	1.54089	5.89e-103
ENSCHIT00000010691	ENSCHIG00000000032	9.17e-136	538.624	5.55e-121
ENSCHIT00000010204	ENSCHIG00000000032	9.17e-136	-328194	3.69e-123
TCONS_00194609	ENSCHIG00000000032	9.17e-136	-2.33e-10	0.000472007
ENSCHIT00000010743	ENSCHIG00000000032	9.17e-136	-1282.44	7.59e-128
ENSCHIT00000010475	ENSCHIG00000000032	9.17e-136	60.7664	4.2e-124
ENSCHIT00000010480	ENSCHIG00000000032	9.17e-136	1196.61	5.58e-126
ENSCHIT00000010980	ENSCHIG00000000032	9.17e-136	3.45467e+06	3.77e-123
ENSCHIT00000010684	ENSCHIG00000000032	9.17e-136	-262.66	8.37e-115
ENSCHIT00000010406	ENSCHIG00000000032	9.17e-136	958.666	9.53e-122
ENSCHIT00000002811	ENSCHIG00000000033	5.85e-10	7377.84	5.85e-10
ENSCHIT00000003276	ENSCHIG00000000035	1.84e-08	-864.237	1.84e-08
ENSCHIT00000008145	ENSCHIG00000000040	6.6e-45	-4.53e-05	0.0143839
TCONS_00231064	ENSCHIG00000000040	6.6e-45	0.0855873	8.48e-38
TCONS_00082938	ENSCHIG00000000040	6.6e-45	-2e-05	0.00171281
ENSCHIT00000007957	ENSCHIG00000000040	6.6e-45	-6.37e-05	0.0310143
TCONS_00040726	ENSCHIG00000000040	6.6e-45	-0.00079091	0.0397405
ENSCHIT00000009300	ENSCHIG00000000040	6.6e-45	0.245799	1.94e-34
TCONS_00353198	ENSCHIG00000000045	3.02e-18	-6.5e-17	0.00261017
TCONS_00094972	ENSCHIG00000000045	3.02e-18	9.61e-16	0.00332274
TCONS_00000958	ENSCHIG00000000045	3.02e-18	0.833872	2.55e-14
TCONS_00087027	ENSCHIG00000000045	3.02e-18	2.92e-16	0.00744319
TCONS_00008527	ENSCHIG00000000045	3.02e-18	2.55e-16	0.00213571
TCONS_00145007	ENSCHIG00000000045	3.02e-18	-1.51e-16	0.00255578
TCONS_00199768	ENSCHIG00000000046	3.02e-151	-1.92e-16	7.14e-11
TCONS_00266416	ENSCHIG00000000046	3.02e-151	2.55502	2.56e-140
TCONS_00034084	ENSCHIG00000000046	3.02e-151	0.783816	1.22e-136
ENSCHIT00000009403	ENSCHIG00000000046	3.02e-151	-1.93e-15	5.07e-10
ENSCHIT00000005425	ENSCHIG00000000046	3.02e-151	-3.89e-16	0.00177807
ENSCHIT00000006028	ENSCHIG00000000046	3.02e-151	1.5e-15	5.41e-10
TCONS_00004215	ENSCHIG00000000046	3.02e-151	6.63e-15	0.000112507
ENSCHIT00000009650	ENSCHIG00000000046	3.02e-151	-1.05e-14	5.55e-10
TCONS_00204824	ENSCHIG00000000046	3.02e-151	2.04e-17	0.0371202
ENSCHIT00000010302	ENSCHIG00000000046	3.02e-151	-2.35e-15	3.82e-10
TCONS_00131966	ENSCHIG00000000046	3.02e-151	-1.95509	8.89e-135
ENSCHIT00000001741	ENSCHIG00000000047	5.99e-145	305.019	1.22e-132
TCONS_00246494	ENSCHIG00000000047	5.99e-145	-4526.46	1.29e-132
TCONS_00210344	ENSCHIG00000000047	5.99e-145	342.479	1.86e-133
ENSCHIT00000010598	ENSCHIG00000000047	5.99e-145	-0.672791	7.72e-126
ENSCHIT00000005281	ENSCHIG00000000047	5.99e-145	-0.119861	2.02e-125
TCONS_00250762	ENSCHIG00000000047	5.99e-145	33.5976	8.03e-136
ENSCHIT00000002576	ENSCHIG00000000047	5.99e-145	0.148002	2.72e-125
TCONS_00085648	ENSCHIG00000000047	5.99e-145	0.0926776	3.29e-122
ENSCHIT00000003444	ENSCHIG00000000047	5.99e-145	-0.38437	1.08e-129
TCONS_00105168	ENSCHIG00000000049	3.07e-100	0.825418	1.24e-65
TCONS_00000232	ENSCHIG00000000049	3.07e-100	-0.0531962	5e-57
ENSCHIT00000001501	ENSCHIG00000000049	3.07e-100	-1.92e-11	0.0158847
ENSCHIT00000001056	ENSCHIG00000000055	3.88e-176	-17.31	2.63e-169
ENSCHIT00000001603	ENSCHIG00000000055	3.88e-176	-2.1724	1.96e-165
ENSCHIT00000001829	ENSCHIG00000000055	3.88e-176	24.7401	2.56e-171
ENSCHIT00000001882	ENSCHIG00000000055	3.88e-176	0.0840586	3.99e-149
ENSCHIT00000011347	ENSCHIG00000000055	3.88e-176	2.34004	4.34e-159
ENSCHIT00000001504	ENSCHIG00000000055	3.88e-176	-1.8463	6.22e-159
ENSCHIT00000010942	ENSCHIG00000000055	3.88e-176	-7.08786	4.01e-166
ENSCHIT00000001383	ENSCHIG00000000055	3.88e-176	12349.6	9.45e-163
ENSCHIT00000001189	ENSCHIG00000000055	3.88e-176	-0.756398	4.75e-162
ENSCHIT00000000980	ENSCHIG00000000057	1.59e-176	4.61841	4.09e-165
ENSCHIT00000009109	ENSCHIG00000000057	1.59e-176	-7.5751	4.02e-168
ENSCHIT00000001673	ENSCHIG00000000057	1.59e-176	-6.75596	2.03e-168
ENSCHIT00000002069	ENSCHIG00000000057	1.59e-176	0.51246	8.09e-162
ENSCHIT00000010847	ENSCHIG00000000057	1.59e-176	-1.62447	6.35e-157
ENSCHIT00000007356	ENSCHIG00000000057	1.59e-176	3.7949	1.55e-159
ENSCHIT00000005622	ENSCHIG00000000057	1.59e-176	-16.5477	2.72e-166
ENSCHIT00000009391	ENSCHIG00000000057	1.59e-176	11.2668	1.72e-169
ENSCHIT00000009112	ENSCHIG00000000057	1.59e-176	-10.3815	6.93e-169
ENSCHIT00000010475	ENSCHIG00000000061	3.79e-106	2.08298	1.01e-92
ENSCHIT00000010684	ENSCHIG00000000061	3.79e-106	-66.4619	4.12e-93
ENSCHIT00000010691	ENSCHIG00000000061	3.79e-106	-20.2459	7.36e-93
ENSCHIT00000010480	ENSCHIG00000000061	3.79e-106	-13.6036	1.62e-93
ENSCHIT00000010406	ENSCHIG00000000061	3.79e-106	-3.14382	1.75e-90
ENSCHIT00000010605	ENSCHIG00000000061	3.79e-106	-83.6317	1.9e-92
ENSCHIT00000010581	ENSCHIG00000000061	3.79e-106	8.46697	4.88e-93
ENSCHIT00000010204	ENSCHIG00000000061	3.79e-106	36.9885	2.26e-93
TCONS_00183438	ENSCHIG00000000061	3.79e-106	4.83004	9.1e-93
ENSCHIT00000006958	ENSCHIG00000000064	1.26e-08	-1.6057	0.00284033
ENSCHIT00000000980	ENSCHIG00000000065	3.54e-48	10.2141	3.38e-42
ENSCHIT00000001019	ENSCHIG00000000065	3.54e-48	-24.0197	3.29e-42
ENSCHIT00000001428	ENSCHIG00000000065	3.54e-48	-11.4647	7.75e-43
TCONS_00176796	ENSCHIG00000000065	3.54e-48	0.441424	1.72e-41
ENSCHIT00000001146	ENSCHIG00000000065	3.54e-48	25.5943	5.9e-41
ENSCHIT00000001313	ENSCHIG00000000065	3.54e-48	-49.9838	4.44e-42
ENSCHIT00000000872	ENSCHIG00000000065	3.54e-48	2.91653	5.47e-42
ENSCHIT00000001134	ENSCHIG00000000065	3.54e-48	34.872	3.11e-41
TCONS_00366470	ENSCHIG00000000065	3.54e-48	-35.599	2.06e-42
ENSCHIT00000002561	ENSCHIG00000000066	2.35e-09	1.46254	0.00778759
ENSCHIT00000005240	ENSCHIG00000000067	2.07e-08	1.86064	2.07e-08
ENSCHIT00000003857	ENSCHIG00000000068	2.66e-08	-39.6014	2.66e-08
ENSCHIT00000009722	ENSCHIG00000000069	8.38e-15	5.73641	5.77e-07
ENSCHIT00000001522	ENSCHIG00000000069	8.38e-15	-4.4676	0.000529219
TCONS_00147634	ENSCHIG00000000069	8.38e-15	-5.41449	5.59e-06
ENSCHIT00000007356	ENSCHIG00000000069	8.38e-15	-20.7148	3.04e-07
ENSCHIT00000001673	ENSCHIG00000000069	8.38e-15	0.895629	1.57e-05
ENSCHIT00000011319	ENSCHIG00000000071	6.33e-14	2.21253	0.0449903
ENSCHIT00000009490	ENSCHIG00000000071	6.33e-14	-8.9213	3.67e-06
ENSCHIT00000006925	ENSCHIG00000000071	6.33e-14	0.332108	0.000480114
ENSCHIT00000010204	ENSCHIG00000000072	2.76e-171	2.25755	6.05e-166
ENSCHIT00000010480	ENSCHIG00000000072	2.76e-171	-0.948339	4.93e-165
ENSCHIT00000010406	ENSCHIG00000000072	2.76e-171	-2.94135	6.94e-166
ENSCHIT00000010743	ENSCHIG00000000072	2.76e-171	0.315086	1.06e-165
ENSCHIT00000010605	ENSCHIG00000000072	2.76e-171	-2.60788	5.47e-165
ENSCHIT00000010691	ENSCHIG00000000072	2.76e-171	-0.363454	1.91e-158
ENSCHIT00000010684	ENSCHIG00000000072	2.76e-171	-2.28513	4.64e-164
ENSCHIT00000010547	ENSCHIG00000000072	2.76e-171	0.61378	7.6e-165
ENSCHIT00000010581	ENSCHIG00000000072	2.76e-171	0.366112	4.56e-166
ENSCHIT00000001639	ENSCHIG00000000076	4.72e-110	1.91814	2.07e-99
ENSCHIT00000000929	ENSCHIG00000000076	4.72e-110	-11.4711	3.57e-103
ENSCHIT00000010406	ENSCHIG00000000076	4.72e-110	64.028	6.25e-103
ENSCHIT00000000999	ENSCHIG00000000076	4.72e-110	-16.1912	4.6e-102
ENSCHIT00000001144	ENSCHIG00000000076	4.72e-110	12.0713	5.01e-96
ENSCHIT00000000777	ENSCHIG00000000076	4.72e-110	18.9726	9.67e-101
TCONS_00062993	ENSCHIG00000000076	4.72e-110	-1e-14	0.00160023
ENSCHIT00000000875	ENSCHIG00000000076	4.72e-110	5.0982	2.37e-104
TCONS_00183438	ENSCHIG00000000076	4.72e-110	-23.1829	3.28e-104
ENSCHIT00000000980	ENSCHIG00000000076	4.72e-110	-1.43232	3e-101
ENSCHIT00000001639	ENSCHIG00000000077	1.11e-145	-0.0529674	5.12e-115
ENSCHIT00000001652	ENSCHIG00000000077	1.11e-145	16221.6	1.84e-130
ENSCHIT00000006651	ENSCHIG00000000077	1.11e-145	1.9587	3.42e-120
ENSCHIT00000000980	ENSCHIG00000000077	1.11e-145	-4.67134	2.05e-134
ENSCHIT00000001968	ENSCHIG00000000077	1.11e-145	-206.661	1.38e-135
TCONS_00183792	ENSCHIG00000000077	1.11e-145	-9.68e-16	1.56e-07
ENSCHIT00000001522	ENSCHIG00000000077	1.11e-145	-13.2558	5.57e-138
ENSCHIT00000003656	ENSCHIG00000000077	1.11e-145	11.6804	1.25e-134
ENSCHIT00000007539	ENSCHIG00000000077	1.11e-145	-30.6022	2.8e-135
ENSCHIT00000007356	ENSCHIG00000000077	1.11e-145	21.0308	1.82e-134
ENSCHIT00000001846	ENSCHIG00000000078	1.98e-153	-6.67e-16	7.33e-07
ENSCHIT00000001138	ENSCHIG00000000078	1.98e-153	1.08e-09	1.06e-14
TCONS_00214336	ENSCHIG00000000078	1.98e-153	-5.84e-17	0.00820205
TCONS_00246494	ENSCHIG00000000078	1.98e-153	104.755	1.92e-102
TCONS_00166741	ENSCHIG00000000078	1.98e-153	1.5e-15	3.93e-05
TCONS_00085648	ENSCHIG00000000078	1.98e-153	-3.81e-16	3.01e-05
TCONS_00250762	ENSCHIG00000000078	1.98e-153	4.58e-15	3.2e-06
TCONS_00210344	ENSCHIG00000000078	1.98e-153	-3.34976	4.84e-94
ENSCHIT00000009668	ENSCHIG00000000081	2.65e-16	-24287.3	5.24e-12
ENSCHIT00000005491	ENSCHIG00000000081	2.65e-16	-7.81478	0.0144617
TCONS_00040993	ENSCHIG00000000081	2.65e-16	115803	5.36e-12
ENSCHIT00000003683	ENSCHIG00000000081	2.65e-16	5.74621	0.0247392
ENSCHIT00000011224	ENSCHIG00000000081	2.65e-16	33760.7	1.25e-11
ENSCHIT00000005482	ENSCHIG00000000081	2.65e-16	2.36529	0.0225928
TCONS_00183439	ENSCHIG00000000081	2.65e-16	-106063	4.43e-12
ENSCHIT00000009269	ENSCHIG00000000081	2.65e-16	-176.807	0.00783852
ENSCHIT00000009109	ENSCHIG00000000082	1.13e-157	0.530171	1.41e-149
ENSCHIT00000005139	ENSCHIG00000000082	1.13e-157	-0.291209	9.12e-147
ENSCHIT00000000875	ENSCHIG00000000082	1.13e-157	0.817319	5.27e-147
ENSCHIT00000005622	ENSCHIG00000000082	1.13e-157	1.68678	1.13e-144
ENSCHIT00000002266	ENSCHIG00000000082	1.13e-157	-0.374728	9.34e-150
TCONS_00324902	ENSCHIG00000000082	1.13e-157	1.95e-16	0.00180962
ENSCHIT00000001428	ENSCHIG00000000082	1.13e-157	0.877024	9.65e-147
ENSCHIT00000003293	ENSCHIG00000000082	1.13e-157	0.462689	2.02e-140
ENSCHIT00000001639	ENSCHIG00000000082	1.13e-157	-0.464733	7.6e-148
ENSCHIT00000002462	ENSCHIG00000000082	1.13e-157	1.31325	1.04e-145
ENSCHIT00000006004	ENSCHIG00000000084	2.29e-126	-4.69457	8.24e-116
ENSCHIT00000007539	ENSCHIG00000000084	2.29e-126	-6.15074	1.11e-116
TCONS_00230083	ENSCHIG00000000084	2.29e-126	3.72e-15	0.0256265
ENSCHIT00000001721	ENSCHIG00000000084	2.29e-126	3.54313	1.94e-117
ENSCHIT00000000980	ENSCHIG00000000084	2.29e-126	2.02615	4.94e-117
ENSCHIT00000001652	ENSCHIG00000000084	2.29e-126	-13665.1	9.6e-116
ENSCHIT00000009233	ENSCHIG00000000084	2.29e-126	2.46932	2.18e-115
ENSCHIT00000009391	ENSCHIG00000000084	2.29e-126	0.937318	6.21e-118
ENSCHIT00000000875	ENSCHIG00000000084	2.29e-126	-0.295109	5.95e-112
ENSCHIT00000001968	ENSCHIG00000000084	2.29e-126	-47.5932	1.63e-114
TCONS_00183792	ENSCHIG00000000084	2.29e-126	8.71e-17	0.0155251
TCONS_00061613	ENSCHIG00000000085	3.22e-150	0.511308	3.07e-136
TCONS_00058947	ENSCHIG00000000085	3.22e-150	-2.4496	2.25e-135
TCONS_00140928	ENSCHIG00000000085	3.22e-150	1.03654	7.15e-136
TCONS_00029584	ENSCHIG00000000085	3.22e-150	7.33646	1.07e-135
ENSCHIT00000010216	ENSCHIG00000000085	3.22e-150	-5.2e-16	3.01e-11
ENSCHIT00000001674	ENSCHIG00000000085	3.22e-150	1.49e-15	2.04e-11
ENSCHIT00000001497	ENSCHIG00000000085	3.22e-150	-3.37e-15	2.43e-10
ENSCHIT00000010481	ENSCHIG00000000085	3.22e-150	-1.71e-15	1.4e-11
ENSCHIT00000002934	ENSCHIG00000000085	3.22e-150	1.77e-14	1.29e-10
ENSCHIT00000010581	ENSCHIG00000000086	6.23e-160	-0.316528	2.04e-149
TCONS_00345641	ENSCHIG00000000086	6.23e-160	-2.41e-16	0.000210679
ENSCHIT00000011232	ENSCHIG00000000086	6.23e-160	-0.383356	2.48e-144
ENSCHIT00000005455	ENSCHIG00000000086	6.23e-160	-0.0174458	4.12e-146
ENSCHIT00000001948	ENSCHIG00000000086	6.23e-160	16402.4	1.85e-148
ENSCHIT00000001914	ENSCHIG00000000086	6.23e-160	0.094261	7.86e-144
ENSCHIT00000003568	ENSCHIG00000000086	6.23e-160	0.159515	1.32e-147
ENSCHIT00000001808	ENSCHIG00000000086	6.23e-160	-0.784852	1.69e-145
ENSCHIT00000005346	ENSCHIG00000000086	6.23e-160	0.0124208	2.06e-138
ENSCHIT00000006529	ENSCHIG00000000086	6.23e-160	1.03412	1.38e-147
ENSCHIT00000006651	ENSCHIG00000000087	9.66e-182	321.231	8.19e-172
ENSCHIT00000001522	ENSCHIG00000000087	9.66e-182	8.56022	1.44e-167
ENSCHIT00000001639	ENSCHIG00000000087	9.66e-182	0.20759	8.59e-157
TCONS_00183438	ENSCHIG00000000087	9.66e-182	30.0374	1.52e-169
ENSCHIT00000008138	ENSCHIG00000000087	9.66e-182	18.868	5.48e-170
ENSCHIT00000008134	ENSCHIG00000000087	9.66e-182	-296.26	1.51e-174
ENSCHIT00000005076	ENSCHIG00000000087	9.66e-182	2.36665	7.77e-167
ENSCHIT00000010218	ENSCHIG00000000087	9.66e-182	21.4336	4.82e-174
ENSCHIT00000001968	ENSCHIG00000000087	9.66e-182	275.189	9.88e-175
ENSCHIT00000001046	ENSCHIG00000000089	4.62e-145	-27.2062	1.32e-137
ENSCHIT00000004799	ENSCHIG00000000089	4.62e-145	-0.917778	2.74e-137
ENSCHIT00000011357	ENSCHIG00000000089	4.62e-145	9.95714	7.99e-138
ENSCHIT00000002015	ENSCHIG00000000089	4.62e-145	-59.0513	1.5e-137
ENSCHIT00000004773	ENSCHIG00000000089	4.62e-145	250.96	1.26e-137
TCONS_00328426	ENSCHIG00000000089	4.62e-145	1.9e-14	0.0115624
ENSCHIT00000010466	ENSCHIG00000000089	4.62e-145	-2.33378	4.28e-139
ENSCHIT00000011312	ENSCHIG00000000089	4.62e-145	273.12	1.67e-137
ENSCHIT00000011229	ENSCHIG00000000089	4.62e-145	54.0056	2.02e-137
ENSCHIT00000001255	ENSCHIG00000000089	4.62e-145	-133.953	1.26e-137
ENSCHIT00000001216	ENSCHIG00000000090	1.35e-143	0.0115977	9.5e-118
ENSCHIT00000001849	ENSCHIG00000000090	1.35e-143	-0.729178	5.73e-128
ENSCHIT00000006356	ENSCHIG00000000090	1.35e-143	-0.180932	1.41e-125
ENSCHIT00000002233	ENSCHIG00000000090	1.35e-143	0.0262229	9.53e-125
ENSCHIT00000002687	ENSCHIG00000000090	1.35e-143	1.36592	8.31e-127
ENSCHIT00000003127	ENSCHIG00000000090	1.35e-143	0.186244	6.84e-124
ENSCHIT00000005031	ENSCHIG00000000090	1.35e-143	-0.295407	1.58e-134
ENSCHIT00000001732	ENSCHIG00000000090	1.35e-143	0.0348348	1.14e-129
ENSCHIT00000006168	ENSCHIG00000000090	1.35e-143	-0.0383024	3.86e-124
TCONS_00305926	ENSCHIG00000000092	5.46e-141	-4.16e-16	0.00161355
TCONS_00052259	ENSCHIG00000000092	5.46e-141	-57.1483	3.39e-133
ENSCHIT00000011258	ENSCHIG00000000092	5.46e-141	0.447563	1.65e-133
ENSCHIT00000001847	ENSCHIG00000000092	5.46e-141	4.50742	4.22e-133
ENSCHIT00000007397	ENSCHIG00000000092	5.46e-141	9.29e-05	2.08e-105
ENSCHIT00000000991	ENSCHIG00000000092	5.46e-141	2.12332	2.43e-134
ENSCHIT00000006727	ENSCHIG00000000092	5.46e-141	-3.29971	5.64e-133
TCONS_00199084	ENSCHIG00000000092	5.46e-141	-0.624675	5.11e-131
TCONS_00215500	ENSCHIG00000000092	5.46e-141	2.42e-16	6.69e-05
ENSCHIT00000005317	ENSCHIG00000000092	5.46e-141	1.81978	1.35e-134
ENSCHIT00000007969	ENSCHIG00000000092	5.46e-141	3.59163	4.56e-132
TCONS_00008527	ENSCHIG00000000094	8.58e-18	2.45e-16	0.0140576
TCONS_00000958	ENSCHIG00000000094	8.58e-18	1.86258	7.23e-14
TCONS_00353198	ENSCHIG00000000094	8.58e-18	-6.25e-17	0.0171903
TCONS_00145007	ENSCHIG00000000094	8.58e-18	-1.45e-16	0.0168491
TCONS_00094972	ENSCHIG00000000094	8.58e-18	8.1e-16	0.0249667
ENSCHIT00000008149	ENSCHIG00000000096	1.86e-08	1.26964	1.86e-08
ENSCHIT00000002249	ENSCHIG00000000097	9.7e-11	2.71932	0.00903594
ENSCHIT00000001073	ENSCHIG00000000097	9.7e-11	2.28486	0.0011347
TCONS_00019608	ENSCHIG00000000098	5.56e-10	1.09219	0.000465106
ENSCHIT00000002397	ENSCHIG00000000098	5.56e-10	3.69089	0.00301374
ENSCHIT00000010204	ENSCHIG00000000099	2.22e-141	-389619	4.45e-128
ENSCHIT00000011229	ENSCHIG00000000099	2.22e-141	-61.8912	9.32e-135
ENSCHIT00000010743	ENSCHIG00000000099	2.22e-141	68.3304	8.71e-128
ENSCHIT00000011312	ENSCHIG00000000099	2.22e-141	-1047.83	4.56e-126
ENSCHIT00000010480	ENSCHIG00000000099	2.22e-141	-167.326	8.27e-133
ENSCHIT00000010466	ENSCHIG00000000099	2.22e-141	179.898	2.73e-128
ENSCHIT00000010980	ENSCHIG00000000099	2.22e-141	4.12688e+06	4.41e-128
ENSCHIT00000010581	ENSCHIG00000000099	2.22e-141	77.8906	1.11e-130
ENSCHIT00000010684	ENSCHIG00000000099	2.22e-141	-1452.51	1.21e-130
ENSCHIT00000000980	ENSCHIG00000000100	2.5e-108	-1.66246	5.7e-97
ENSCHIT00000001133	ENSCHIG00000000100	2.5e-108	-7.21495	1.62e-99
ENSCHIT00000001313	ENSCHIG00000000100	2.5e-108	204.377	1.33e-100
ENSCHIT00000001019	ENSCHIG00000000100	2.5e-108	-36.5505	6.41e-102
ENSCHIT00000010847	ENSCHIG00000000100	2.5e-108	-73.099	1.46e-100
ENSCHIT00000001923	ENSCHIG00000000100	2.5e-108	-92.8865	5.61e-100
ENSCHIT00000001673	ENSCHIG00000000100	2.5e-108	-1.09384	8.57e-100
ENSCHIT00000002069	ENSCHIG00000000100	2.5e-108	-1.83541	6.86e-99
ENSCHIT00000001134	ENSCHIG00000000100	2.5e-108	95.7842	9.05e-101
ENSCHIT00000002059	ENSCHIG00000000101	4.21e-12	0.801138	0.00417299
TCONS_00108748	ENSCHIG00000000101	4.21e-12	0.520602	0.0175315
ENSCHIT00000001522	ENSCHIG00000000102	5.55e-09	-19.5252	0.0161775
ENSCHIT00000003202	ENSCHIG00000000103	3.84e-160	5.85e-12	3.73e-08
TCONS_00040993	ENSCHIG00000000103	3.84e-160	0.33753	3.74e-111
TCONS_00000232	ENSCHIG00000000103	3.84e-160	1.61614	4.05e-103
ENSCHIT00000001144	ENSCHIG00000000104	1.79e-78	38.4141	1.89e-69
ENSCHIT00000001691	ENSCHIG00000000104	1.79e-78	64.4036	1.17e-69
ENSCHIT00000001031	ENSCHIG00000000104	1.79e-78	-2.11972	2.57e-66
ENSCHIT00000001639	ENSCHIG00000000104	1.79e-78	0.848038	1.88e-68
ENSCHIT00000001803	ENSCHIG00000000104	1.79e-78	-12.971	7.2e-72
TCONS_00014930	ENSCHIG00000000104	1.79e-78	4.81e-16	0.0481241
ENSCHIT00000001740	ENSCHIG00000000104	1.79e-78	-4.49483	2.48e-69
ENSCHIT00000002069	ENSCHIG00000000104	1.79e-78	-0.494459	3.83e-70
ENSCHIT00000001428	ENSCHIG00000000104	1.79e-78	1.30269	2.06e-70
ENSCHIT00000001673	ENSCHIG00000000104	1.79e-78	-0.509919	1.05e-70
ENSCHIT00000006946	ENSCHIG00000000105	4.13e-09	-5.1671	4.13e-09
ENSCHIT00000000980	ENSCHIG00000000106	7.4e-13	0.677279	0.0447928
ENSCHIT00000000875	ENSCHIG00000000106	7.4e-13	1.2141	0.000485236
ENSCHIT00000010245	ENSCHIG00000000106	7.4e-13	761256	0.000192772
ENSCHIT00000005375	ENSCHIG00000000106	7.4e-13	-4.44904	2.46e-05
ENSCHIT00000007648	ENSCHIG00000000107	8.35e-09	-0.0438559	8.35e-09
ENSCHIT00000006969	ENSCHIG00000000110	5.23e-09	-0.0501335	0.00205616
ENSCHIT00000005252	ENSCHIG00000000111	1.75e-12	-0.518813	4.79e-05
ENSCHIT00000009434	ENSCHIG00000000111	1.75e-12	-0.305939	0.000807047
ENSCHIT00000001144	ENSCHIG00000000112	2.12e-79	205.639	7.83e-73
ENSCHIT00000000955	ENSCHIG00000000112	2.12e-79	26.3705	6.14e-74
ENSCHIT00000001313	ENSCHIG00000000112	2.12e-79	-47.0523	2.9e-71
ENSCHIT00000010605	ENSCHIG00000000112	2.12e-79	-235.236	2e-71
ENSCHIT00000000980	ENSCHIG00000000112	2.12e-79	-5.94739	1.11e-70
ENSCHIT00000000987	ENSCHIG00000000112	2.12e-79	12.4888	9.34e-71
ENSCHIT00000000929	ENSCHIG00000000112	2.12e-79	-65.2517	1.66e-73
ENSCHIT00000010847	ENSCHIG00000000112	2.12e-79	28.8934	1.19e-71
ENSCHIT00000001134	ENSCHIG00000000112	2.12e-79	-78.8969	3.63e-72
ENSCHIT00000006358	ENSCHIG00000000113	9.62e-11	-35.8487	0.00111388
ENSCHIT00000000779	ENSCHIG00000000113	9.62e-11	-68.7487	7.31e-05
ENSCHIT00000010480	ENSCHIG00000000114	1.01e-83	-666.809	9.12e-74
ENSCHIT00000010684	ENSCHIG00000000114	1.01e-83	-3871.4	9.58e-74
ENSCHIT00000010475	ENSCHIG00000000114	1.01e-83	157.384	1.06e-73
ENSCHIT00000010406	ENSCHIG00000000114	1.01e-83	-446.302	1.02e-73
TCONS_00183438	ENSCHIG00000000114	1.01e-83	809.508	1.09e-73
ENSCHIT00000010466	ENSCHIG00000000114	1.01e-83	-234.514	1.22e-73
ENSCHIT00000010204	ENSCHIG00000000114	1.01e-83	1891.02	9.8e-74
ENSCHIT00000010605	ENSCHIG00000000114	1.01e-83	-5768.58	1.16e-73
ENSCHIT00000010581	ENSCHIG00000000114	1.01e-83	647.381	1.04e-73
ENSCHIT00000002148	ENSCHIG00000000115	2.41e-172	-2.03e-15	2.97e-14
ENSCHIT00000011034	ENSCHIG00000000115	2.41e-172	-2.11e-16	9.48e-15
ENSCHIT00000001012	ENSCHIG00000000115	2.41e-172	6.2337	1.84e-117
ENSCHIT00000011169	ENSCHIG00000000115	2.41e-172	2.15e-11	2.08e-07
TCONS_00267052	ENSCHIG00000000115	2.41e-172	-0.0243696	1.52e-93
ENSCHIT00000001424	ENSCHIG00000000115	2.41e-172	7.76e-12	5.34e-19
ENSCHIT00000002519	ENSCHIG00000000115	2.41e-172	-6.15e-15	8.99e-19
TCONS_00083065	ENSCHIG00000000115	2.41e-172	-1.62e-16	6.91e-17
ENSCHIT00000003423	ENSCHIG00000000115	2.41e-172	-8.78e-16	1.73e-17
ENSCHIT00000001895	ENSCHIG00000000115	2.41e-172	2.49e-17	0.00551791
ENSCHIT00000008199	ENSCHIG00000000118	2.38e-08	-2.73663	2.38e-08
ENSCHIT00000001318	ENSCHIG00000000119	1.22e-08	0.999615	1.22e-08
TCONS_00014930	ENSCHIG00000000120	5.24e-139	1.42e-17	0.00556929
ENSCHIT00000010480	ENSCHIG00000000120	5.24e-139	-0.64946	6.38e-128
ENSCHIT00000010743	ENSCHIG00000000120	5.24e-139	0.0451109	1.1e-128
TCONS_00183438	ENSCHIG00000000120	5.24e-139	-0.267518	3.17e-131
ENSCHIT00000010691	ENSCHIG00000000120	5.24e-139	0.190824	5.8e-124
ENSCHIT00000010505	ENSCHIG00000000120	5.24e-139	6.55422	2.63e-130
ENSCHIT00000010581	ENSCHIG00000000120	5.24e-139	0.166361	1.35e-132
TCONS_00078498	ENSCHIG00000000120	5.24e-139	-2.48e-16	0.0495524
ENSCHIT00000010204	ENSCHIG00000000120	5.24e-139	1.40933	1.73e-129
ENSCHIT00000010605	ENSCHIG00000000120	5.24e-139	-0.788206	4.41e-129
ENSCHIT00000010406	ENSCHIG00000000120	5.24e-139	-3.32139	3.6e-131
ENSCHIT00000005708	ENSCHIG00000000121	3.07e-09	-8.74592	3.07e-09
ENSCHIT00000000777	ENSCHIG00000000123	1.1e-184	-2.77631	6.85e-176
ENSCHIT00000011312	ENSCHIG00000000123	1.1e-184	-4.35825	1.59e-175
ENSCHIT00000010480	ENSCHIG00000000123	1.1e-184	3.84027	1.02e-177
ENSCHIT00000010983	ENSCHIG00000000123	1.1e-184	-1.03833	1.52e-174
ENSCHIT00000001144	ENSCHIG00000000123	1.1e-184	2.30964	3.28e-171
ENSCHIT00000010908	ENSCHIG00000000123	1.1e-184	-1.55919	1.15e-175
ENSCHIT00000010805	ENSCHIG00000000123	1.1e-184	0.106146	3.04e-176
ENSCHIT00000010773	ENSCHIG00000000123	1.1e-184	-2.16693	2.64e-178
ENSCHIT00000010505	ENSCHIG00000000123	1.1e-184	13.1929	5.08e-177
ENSCHIT00000010605	ENSCHIG00000000125	1.35e-118	-2870.79	1.85e-100
ENSCHIT00000010475	ENSCHIG00000000125	1.35e-118	78.1524	1.72e-100
ENSCHIT00000010406	ENSCHIG00000000125	1.35e-118	-231.4	1.17e-100
ENSCHIT00000010581	ENSCHIG00000000125	1.35e-118	317.549	1.87e-100
ENSCHIT00000010466	ENSCHIG00000000125	1.35e-118	-112.933	2.56e-100
ENSCHIT00000010480	ENSCHIG00000000125	1.35e-118	-344.054	1.11e-100
ENSCHIT00000010684	ENSCHIG00000000125	1.35e-118	-1910.11	1.67e-100
TCONS_00183438	ENSCHIG00000000125	1.35e-118	401.236	1.88e-100
ENSCHIT00000010204	ENSCHIG00000000125	1.35e-118	984.704	1.11e-100
ENSCHIT00000008107	ENSCHIG00000000126	7.41e-09	2.20046	7.41e-09
ENSCHIT00000003723	ENSCHIG00000000127	3.87e-08	3.95714	0.0326001
ENSCHIT00000006457	ENSCHIG00000000127	3.87e-08	22586.8	0.0206109
TCONS_00183438	ENSCHIG00000000128	4.4e-81	-65.7734	1.29e-74
ENSCHIT00000000929	ENSCHIG00000000128	4.4e-81	-29.2954	1.64e-75
ENSCHIT00000000980	ENSCHIG00000000128	4.4e-81	1.1252	2.62e-73
ENSCHIT00000000875	ENSCHIG00000000128	4.4e-81	-3.77826	2.44e-72
ENSCHIT00000010605	ENSCHIG00000000128	4.4e-81	-1.25495	7.85e-65
ENSCHIT00000001134	ENSCHIG00000000128	4.4e-81	15.4917	3.47e-74
TCONS_00062993	ENSCHIG00000000128	4.4e-81	-1.09e-14	0.00355398
ENSCHIT00000010847	ENSCHIG00000000128	4.4e-81	-9.23306	4.86e-76
ENSCHIT00000001428	ENSCHIG00000000128	4.4e-81	-14.4466	2.26e-74
ENSCHIT00000001144	ENSCHIG00000000128	4.4e-81	35.5968	4.02e-73
TCONS_00014930	ENSCHIG00000000128	4.4e-81	6.14e-16	0.00100328
TCONS_00105630	ENSCHIG00000000128	4.4e-81	6.36e-16	0.0162965
ENSCHIT00000000895	ENSCHIG00000000129	5.67e-15	-10.6263	4.04e-08
ENSCHIT00000002778	ENSCHIG00000000129	5.67e-15	-58.4572	1.36e-07
ENSCHIT00000011182	ENSCHIG00000000129	5.67e-15	46.8022	3.88e-05
ENSCHIT00000007208	ENSCHIG00000000129	5.67e-15	-11.4273	2.6e-06
TCONS_00374361	ENSCHIG00000000129	5.67e-15	4.37499	2.4e-05
TCONS_00166954	ENSCHIG00000000129	5.67e-15	10.6989	8.18e-09
ENSCHIT00000001968	ENSCHIG00000000131	3.92e-15	229.084	6.15e-05
ENSCHIT00000001322	ENSCHIG00000000131	3.92e-15	-4.50294	0.0100415
ENSCHIT00000009094	ENSCHIG00000000131	3.92e-15	-128.86	1.3e-05
ENSCHIT00000009112	ENSCHIG00000000131	3.92e-15	3.57837	0.00207762
TCONS_00183438	ENSCHIG00000000134	4.91e-79	166.317	1.4e-68
ENSCHIT00000010505	ENSCHIG00000000134	4.91e-79	883.706	9.55e-68
ENSCHIT00000010475	ENSCHIG00000000134	4.91e-79	1.36488	1.77e-71
ENSCHIT00000010480	ENSCHIG00000000134	4.91e-79	-42.7302	1.04e-64
TCONS_00319548	ENSCHIG00000000134	4.91e-79	-4.63e-15	0.00759945
ENSCHIT00000010466	ENSCHIG00000000134	4.91e-79	-70.7643	2.81e-69
TCONS_00280515	ENSCHIG00000000134	4.91e-79	1.25e-14	0.0137195
ENSCHIT00000010691	ENSCHIG00000000134	4.91e-79	574.013	8.68e-72
ENSCHIT00000010204	ENSCHIG00000000134	4.91e-79	28.467	4.27e-63
TCONS_00014930	ENSCHIG00000000134	4.91e-79	-2.31e-15	0.0210196
ENSCHIT00000010406	ENSCHIG00000000134	4.91e-79	-217.102	3.14e-67
ENSCHIT00000010605	ENSCHIG00000000134	4.91e-79	654.718	4.41e-72
ENSCHIT00000005798	ENSCHIG00000000135	2.17e-08	12.3904	2.17e-08
ENSCHIT00000010691	ENSCHIG00000000136	6.12e-142	-0.195331	2.34e-117
ENSCHIT00000010204	ENSCHIG00000000136	6.12e-142	-7.42963	1.67e-128
ENSCHIT00000010581	ENSCHIG00000000136	6.12e-142	-2.65497	1.67e-133
ENSCHIT00000010942	ENSCHIG00000000136	6.12e-142	-0.469464	1e-130
ENSCHIT00000010480	ENSCHIG00000000136	6.12e-142	2.98473	1.71e-127
ENSCHIT00000010684	ENSCHIG00000000136	6.12e-142	4.28834	1.57e-126
ENSCHIT00000010605	ENSCHIG00000000136	6.12e-142	4.80647	3.19e-128
ENSCHIT00000010547	ENSCHIG00000000136	6.12e-142	-2.59927	1.7e-131
ENSCHIT00000010406	ENSCHIG00000000136	6.12e-142	16.517	6.99e-130
ENSCHIT00000000998	ENSCHIG00000000137	2.37e-11	-1.99029	0.00640407
ENSCHIT00000000819	ENSCHIG00000000137	2.37e-11	103515	0.000477792
ENSCHIT00000001422	ENSCHIG00000000138	9.27e-179	1.32769	9.68e-166
ENSCHIT00000007437	ENSCHIG00000000138	9.27e-179	0.262538	3.61e-151
ENSCHIT00000006819	ENSCHIG00000000138	9.27e-179	-2.09111	1.19e-165
ENSCHIT00000008100	ENSCHIG00000000138	9.27e-179	1.91746	6.64e-170
ENSCHIT00000000865	ENSCHIG00000000138	9.27e-179	-0.566553	5.53e-164
ENSCHIT00000002843	ENSCHIG00000000138	9.27e-179	2.77495	3.9e-160
ENSCHIT00000009035	ENSCHIG00000000138	9.27e-179	0.855084	3.22e-164
ENSCHIT00000001723	ENSCHIG00000000138	9.27e-179	6.95972	8.85e-171
ENSCHIT00000004881	ENSCHIG00000000138	9.27e-179	3.39943	4.28e-165
ENSCHIT00000001134	ENSCHIG00000000141	4.02e-164	521.098	8.09e-158
ENSCHIT00000001522	ENSCHIG00000000141	4.02e-164	42.4375	2.68e-157
ENSCHIT00000001313	ENSCHIG00000000141	4.02e-164	1538.47	5.47e-158
ENSCHIT00000001923	ENSCHIG00000000141	4.02e-164	-819.374	5.93e-158
ENSCHIT00000010847	ENSCHIG00000000141	4.02e-164	-313.199	6.15e-158
ENSCHIT00000001639	ENSCHIG00000000141	4.02e-164	-42.9265	1.17e-157
ENSCHIT00000000980	ENSCHIG00000000141	4.02e-164	-19.2397	4.56e-159
ENSCHIT00000001673	ENSCHIG00000000141	4.02e-164	-3.10431	1.27e-156
ENSCHIT00000001133	ENSCHIG00000000141	4.02e-164	-112.559	2.31e-158
ENSCHIT00000001621	ENSCHIG00000000142	4.92e-10	206.659	4.92e-10
ENSCHIT00000010691	ENSCHIG00000000143	3.34e-65	-181.56	5.9e-53
ENSCHIT00000010406	ENSCHIG00000000143	3.34e-65	-234.625	1.34e-52
TCONS_00183438	ENSCHIG00000000143	3.34e-65	-90.0794	6.57e-54
ENSCHIT00000010480	ENSCHIG00000000143	3.34e-65	-36.065	1.24e-52
ENSCHIT00000010475	ENSCHIG00000000143	3.34e-65	2.99262	1.53e-50
ENSCHIT00000010980	ENSCHIG00000000143	3.34e-65	-831819	2.12e-53
ENSCHIT00000010204	ENSCHIG00000000143	3.34e-65	78758.2	2.12e-53
ENSCHIT00000010605	ENSCHIG00000000143	3.34e-65	-244.471	5.36e-51
ENSCHIT00000010581	ENSCHIG00000000143	3.34e-65	-8.78255	1.53e-51
ENSCHIT00000010605	ENSCHIG00000000145	3.41e-155	4.46402	6.77e-144
ENSCHIT00000010743	ENSCHIG00000000145	3.41e-155	1.29154	3.56e-147
ENSCHIT00000010480	ENSCHIG00000000145	3.41e-155	-3.90003	1.66e-145
ENSCHIT00000010684	ENSCHIG00000000145	3.41e-155	-20.4867	2.78e-147
ENSCHIT00000010406	ENSCHIG00000000145	3.41e-155	-8.17677	4.14e-142
ENSCHIT00000010983	ENSCHIG00000000145	3.41e-155	3.50538	8.25e-147
ENSCHIT00000010204	ENSCHIG00000000145	3.41e-155	3987.63	1.64e-148
ENSCHIT00000010980	ENSCHIG00000000145	3.41e-155	-42156.5	1.63e-148
TCONS_00183438	ENSCHIG00000000145	3.41e-155	4.45215	6.73e-147
ENSCHIT00000001340	ENSCHIG00000000146	8.88e-85	-1289.32	9.92e-75
ENSCHIT00000001133	ENSCHIG00000000146	8.88e-85	2342.1	1.56e-74
ENSCHIT00000010847	ENSCHIG00000000146	8.88e-85	2164.47	2.79e-74
ENSCHIT00000001134	ENSCHIG00000000146	8.88e-85	-10862.9	1.89e-74
TCONS_00309905	ENSCHIG00000000146	8.88e-85	5.72e-13	0.00841943
ENSCHIT00000001217	ENSCHIG00000000146	8.88e-85	707.658	8.84e-75
ENSCHIT00000001019	ENSCHIG00000000146	8.88e-85	5076.46	1.88e-74
ENSCHIT00000001313	ENSCHIG00000000146	8.88e-85	-9916.24	1.94e-74
ENSCHIT00000001442	ENSCHIG00000000146	8.88e-85	1614.13	1.66e-74
TCONS_00291695	ENSCHIG00000000146	8.88e-85	3.95e-12	0.0123558
ENSCHIT00000001146	ENSCHIG00000000146	8.88e-85	-9254.25	1.59e-74
ENSCHIT00000000929	ENSCHIG00000000147	2.98e-81	42.5745	1.13e-71
ENSCHIT00000001217	ENSCHIG00000000147	2.98e-81	-28.2572	1.88e-70
ENSCHIT00000010605	ENSCHIG00000000147	2.98e-81	670.22	2.34e-71
ENSCHIT00000001056	ENSCHIG00000000147	2.98e-81	34.9742	9.66e-69
ENSCHIT00000001146	ENSCHIG00000000147	2.98e-81	58.6497	1e-75
ENSCHIT00000011398	ENSCHIG00000000147	2.98e-81	31.8697	2.6e-71
ENSCHIT00000011347	ENSCHIG00000000147	2.98e-81	104.569	9.77e-73
ENSCHIT00000000872	ENSCHIG00000000147	2.98e-81	-20.2557	6.65e-73
ENSCHIT00000000987	ENSCHIG00000000147	2.98e-81	-61.832	2.17e-74
ENSCHIT00000001923	ENSCHIG00000000151	2.6e-12	-14.2303	0.00282754
ENSCHIT00000005811	ENSCHIG00000000151	2.6e-12	-19.1291	0.0438198
ENSCHIT00000005694	ENSCHIG00000000151	2.6e-12	8.49212	0.00131031
TCONS_00012317	ENSCHIG00000000151	2.6e-12	-2.32536	0.00394647
ENSCHIT00000009730	ENSCHIG00000000151	2.6e-12	-23.3223	0.000409985
ENSCHIT00000009751	ENSCHIG00000000151	2.6e-12	-7.04727	8.5e-07
TCONS_00183438	ENSCHIG00000000152	1.44e-67	-362.791	2.76e-64
ENSCHIT00000010605	ENSCHIG00000000152	1.44e-67	-508.703	2.53e-62
ENSCHIT00000010980	ENSCHIG00000000152	1.44e-67	-672965	2.12e-62
ENSCHIT00000010480	ENSCHIG00000000152	1.44e-67	-23.2521	1.77e-58
ENSCHIT00000011358	ENSCHIG00000000152	1.44e-67	33.9691	2.14e-62
ENSCHIT00000010983	ENSCHIG00000000152	1.44e-67	-145.326	1.36e-62
ENSCHIT00000011398	ENSCHIG00000000152	1.44e-67	-48.5129	1.9e-63
ENSCHIT00000010204	ENSCHIG00000000152	1.44e-67	64173.3	2.07e-62
ENSCHIT00000010406	ENSCHIG00000000152	1.44e-67	-1912.05	9.21e-64
TCONS_00211096	ENSCHIG00000000153	2.84e-124	-1.21e-11	0.0046146
ENSCHIT00000005622	ENSCHIG00000000153	2.84e-124	-0.0911683	3.13e-110
TCONS_00129478	ENSCHIG00000000153	2.84e-124	3196.96	1.89e-112
TCONS_00143910	ENSCHIG00000000153	2.84e-124	0.210005	4.15e-113
ENSCHIT00000003767	ENSCHIG00000000153	2.84e-124	0.0660268	1.81e-112
ENSCHIT00000010932	ENSCHIG00000000153	2.84e-124	0.600696	5.19e-116
ENSCHIT00000010614	ENSCHIG00000000153	2.84e-124	-0.0195287	2.76e-106
ENSCHIT00000001501	ENSCHIG00000000153	2.84e-124	-111211	7.13e-113
ENSCHIT00000010697	ENSCHIG00000000153	2.84e-124	4172.58	1.86e-113
TCONS_00332368	ENSCHIG00000000153	2.84e-124	-1045.85	4.44e-97
TCONS_00145007	ENSCHIG00000000154	5.74e-18	-7.33e-17	0.00901935
TCONS_00000958	ENSCHIG00000000154	5.74e-18	0.754587	4.83e-14
TCONS_00353198	ENSCHIG00000000154	5.74e-18	-3.16e-17	0.00921431
TCONS_00008527	ENSCHIG00000000154	5.74e-18	1.24e-16	0.00754119
TCONS_00094972	ENSCHIG00000000154	5.74e-18	4.56e-16	0.01202
TCONS_00087027	ENSCHIG00000000154	5.74e-18	1.44e-16	0.0258157
ENSCHIT00000001923	ENSCHIG00000000155	8.11e-178	0.905203	1.04e-160
ENSCHIT00000009597	ENSCHIG00000000155	8.11e-178	0.0651324	1.66e-155
ENSCHIT00000007356	ENSCHIG00000000155	8.11e-178	-0.134506	6.28e-156
TCONS_00305927	ENSCHIG00000000155	8.11e-178	-1.69134	8.36e-162
ENSCHIT00000002441	ENSCHIG00000000155	8.11e-178	0.626748	1.31e-166
ENSCHIT00000001461	ENSCHIG00000000155	8.11e-178	6.13309	4.74e-166
ENSCHIT00000010427	ENSCHIG00000000155	8.11e-178	-0.0852895	5.07e-162
ENSCHIT00000001146	ENSCHIG00000000155	8.11e-178	0.456103	1.75e-163
ENSCHIT00000001313	ENSCHIG00000000155	8.11e-178	-2.50181	5.05e-162
ENSCHIT00000006051	ENSCHIG00000000157	2.18e-14	-3.8918	1.57e-05
ENSCHIT00000005425	ENSCHIG00000000157	2.18e-14	-0.340158	9.08e-05
ENSCHIT00000000982	ENSCHIG00000000157	2.18e-14	0.0725008	1.04e-06
ENSCHIT00000004811	ENSCHIG00000000157	2.18e-14	3.79711	1.96e-06
TCONS_00034084	ENSCHIG00000000157	2.18e-14	0.840967	5.11e-06
ENSCHIT00000009316	ENSCHIG00000000158	7.4e-10	-5.49026	7.4e-10
ENSCHIT00000010935	ENSCHIG00000000160	1.64e-08	1.02711	1.64e-08
ENSCHIT00000000929	ENSCHIG00000000164	1.35e-77	0.807946	3.94e-69
ENSCHIT00000001383	ENSCHIG00000000164	1.35e-77	-802.261	6.77e-63
ENSCHIT00000010980	ENSCHIG00000000164	1.35e-77	-16229.4	1.79e-71
TCONS_00014930	ENSCHIG00000000164	1.35e-77	-1.48e-14	0.0372442
ENSCHIT00000000872	ENSCHIG00000000164	1.35e-77	-0.0873045	5.58e-66
ENSCHIT00000010547	ENSCHIG00000000164	1.35e-77	2.73327	2.62e-70
ENSCHIT00000010942	ENSCHIG00000000164	1.35e-77	-0.831055	3.66e-67
ENSCHIT00000011347	ENSCHIG00000000164	1.35e-77	0.961353	5.47e-68
ENSCHIT00000010204	ENSCHIG00000000164	1.35e-77	1532.28	1.76e-71
ENSCHIT00000001144	ENSCHIG00000000164	1.35e-77	0.607189	2.46e-61
ENSCHIT00000005875	ENSCHIG00000000165	1.44e-08	0.637507	1.44e-08
ENSCHIT00000001189	ENSCHIG00000000169	1.49e-171	2.03094	2.57e-163
ENSCHIT00000001640	ENSCHIG00000000169	1.49e-171	18.1545	4.31e-164
ENSCHIT00000001707	ENSCHIG00000000169	1.49e-171	5.53169	4.73e-158
ENSCHIT00000001154	ENSCHIG00000000169	1.49e-171	-14.382	2.91e-161
ENSCHIT00000001209	ENSCHIG00000000169	1.49e-171	-4.37037	3.02e-162
ENSCHIT00000000929	ENSCHIG00000000169	1.49e-171	-4.28189	4.37e-160
ENSCHIT00000001849	ENSCHIG00000000169	1.49e-171	-84.8473	1.15e-164
ENSCHIT00000001585	ENSCHIG00000000169	1.49e-171	19.4674	1.08e-160
ENSCHIT00000001603	ENSCHIG00000000169	1.49e-171	1.10202	3.99e-158
TCONS_00062993	ENSCHIG00000000170	1.56e-76	-1.95e-14	0.0430388
ENSCHIT00000001428	ENSCHIG00000000170	1.56e-76	-2.11925	3.26e-70
ENSCHIT00000001923	ENSCHIG00000000170	1.56e-76	153.634	2.59e-71
ENSCHIT00000001585	ENSCHIG00000000170	1.56e-76	43.6527	2.08e-71
ENSCHIT00000001673	ENSCHIG00000000170	1.56e-76	2.44506	9.79e-71
ENSCHIT00000001134	ENSCHIG00000000170	1.56e-76	-53.2307	1.34e-71
TCONS_00014930	ENSCHIG00000000170	1.56e-76	2.19e-15	0.00330324
ENSCHIT00000001639	ENSCHIG00000000170	1.56e-76	0.838653	1.17e-68
ENSCHIT00000002069	ENSCHIG00000000170	1.56e-76	3.32975	1.12e-70
ENSCHIT00000010847	ENSCHIG00000000170	1.56e-76	48.8764	3.46e-71
ENSCHIT00000001313	ENSCHIG00000000170	1.56e-76	-247.183	2.74e-71
TCONS_00321071	ENSCHIG00000000170	1.56e-76	3.2e-14	0.0404687
ENSCHIT00000005277	ENSCHIG00000000172	3.34e-12	0.219619	0.0250405
TCONS_00118259	ENSCHIG00000000172	3.34e-12	0.0925588	2.02e-05
TCONS_00183438	ENSCHIG00000000173	2.27e-145	313.909	5.91e-133
ENSCHIT00000010684	ENSCHIG00000000173	2.27e-145	-1494.85	5.19e-133
ENSCHIT00000010204	ENSCHIG00000000173	2.27e-145	728.666	5.34e-133
TCONS_00078498	ENSCHIG00000000173	2.27e-145	-1.82e-13	0.0005084
ENSCHIT00000010605	ENSCHIG00000000173	2.27e-145	-2303.41	5.24e-133
ENSCHIT00000010406	ENSCHIG00000000173	2.27e-145	-166.8	7.32e-133
ENSCHIT00000010480	ENSCHIG00000000173	2.27e-145	-250.48	6.52e-133
ENSCHIT00000010466	ENSCHIG00000000173	2.27e-145	-91.505	6.93e-133
ENSCHIT00000010581	ENSCHIG00000000173	2.27e-145	252.183	5.82e-133
ENSCHIT00000010475	ENSCHIG00000000173	2.27e-145	62.3875	4.87e-133
ENSCHIT00000001844	ENSCHIG00000000174	5.61e-14	40.5706	2.25e-06
ENSCHIT00000010147	ENSCHIG00000000174	5.61e-14	23.375	3.95e-06
ENSCHIT00000007321	ENSCHIG00000000174	5.61e-14	-31.0549	3.36e-07
ENSCHIT00000005383	ENSCHIG00000000174	5.61e-14	27.6317	0.000142056
ENSCHIT00000001313	ENSCHIG00000000174	5.61e-14	-28.3307	1.83e-06
ENSCHIT00000010406	ENSCHIG00000000176	1.04e-98	-110.261	9.57e-85
ENSCHIT00000010204	ENSCHIG00000000176	1.04e-98	498.613	6.53e-85
ENSCHIT00000010581	ENSCHIG00000000176	1.04e-98	166.219	8.39e-85
ENSCHIT00000010480	ENSCHIG00000000176	1.04e-98	-174.795	6.32e-85
TCONS_00183438	ENSCHIG00000000176	1.04e-98	209.247	8.7e-85
ENSCHIT00000010684	ENSCHIG00000000176	1.04e-98	-1014.44	6.77e-85
ENSCHIT00000010475	ENSCHIG00000000176	1.04e-98	40.9973	7.73e-85
ENSCHIT00000010466	ENSCHIG00000000176	1.04e-98	-59.9806	1.01e-84
ENSCHIT00000010605	ENSCHIG00000000176	1.04e-98	-1528.08	7.45e-85
TCONS_00223861	ENSCHIG00000000177	1.57e-18	-1.13e-16	0.0053323
TCONS_00073476	ENSCHIG00000000177	1.57e-18	1.98e-14	0.000675132
TCONS_00000227	ENSCHIG00000000177	1.57e-18	7.38039	4.98e-17
TCONS_00065674	ENSCHIG00000000178	4.79e-119	2.29e-16	0.00312295
TCONS_00141016	ENSCHIG00000000178	4.79e-119	0.157125	1.22e-76
TCONS_00078777	ENSCHIG00000000178	4.79e-119	5.64688	1.32e-77
ENSCHIT00000011357	ENSCHIG00000000179	1.73e-61	-241.77	6.12e-58
ENSCHIT00000010980	ENSCHIG00000000179	1.73e-61	4.16323e+06	1.24e-57
ENSCHIT00000010406	ENSCHIG00000000179	1.73e-61	5861.68	8.84e-58
ENSCHIT00000010480	ENSCHIG00000000179	1.73e-61	1975.75	6.99e-58
ENSCHIT00000010605	ENSCHIG00000000179	1.73e-61	593.599	5.15e-57
ENSCHIT00000011312	ENSCHIG00000000179	1.73e-61	2073.79	1.15e-57
ENSCHIT00000010204	ENSCHIG00000000179	1.73e-61	-395787	1.24e-57
ENSCHIT00000010691	ENSCHIG00000000179	1.73e-61	712.212	7.75e-58
ENSCHIT00000010983	ENSCHIG00000000179	1.73e-61	-1508.61	5.97e-58
ENSCHIT00000005569	ENSCHIG00000000180	7.9e-15	1.63063	0.000426733
ENSCHIT00000001006	ENSCHIG00000000181	8.14e-12	1.71568	0.000884858
ENSCHIT00000008443	ENSCHIG00000000181	8.14e-12	-5.39394	1.65e-05
ENSCHIT00000010581	ENSCHIG00000000183	1.44e-84	-172.223	8.41e-75
ENSCHIT00000010684	ENSCHIG00000000183	1.44e-84	1008.47	8.77e-75
TCONS_00183438	ENSCHIG00000000183	1.44e-84	-212.97	7.9e-75
ENSCHIT00000010204	ENSCHIG00000000183	1.44e-84	-490.465	1.04e-74
ENSCHIT00000010605	ENSCHIG00000000183	1.44e-84	1576.81	7.6e-75
ENSCHIT00000010475	ENSCHIG00000000183	1.44e-84	-42.1558	7.67e-75
ENSCHIT00000010466	ENSCHIG00000000183	1.44e-84	63.4266	7.39e-75
ENSCHIT00000010480	ENSCHIG00000000183	1.44e-84	173.037	1.06e-74
ENSCHIT00000010406	ENSCHIG00000000183	1.44e-84	114.598	3.21e-74
ENSCHIT00000011312	ENSCHIG00000000184	6.4e-138	-9.54469	5.66e-124
TCONS_00078498	ENSCHIG00000000184	6.4e-138	-2.76e-15	3.38e-07
ENSCHIT00000001051	ENSCHIG00000000184	6.4e-138	0.349176	3.68e-124
ENSCHIT00000010691	ENSCHIG00000000184	6.4e-138	-7.07289	4.96e-124
ENSCHIT00000000929	ENSCHIG00000000184	6.4e-138	-0.628644	3.42e-123
ENSCHIT00000000777	ENSCHIG00000000184	6.4e-138	2.41783	5e-124
ENSCHIT00000001397	ENSCHIG00000000184	6.4e-138	2.56619	6.7e-124
ENSCHIT00000000771	ENSCHIG00000000184	6.4e-138	24337	4.3e-127
ENSCHIT00000000999	ENSCHIG00000000184	6.4e-138	-0.519111	6.35e-125
ENSCHIT00000000782	ENSCHIG00000000184	6.4e-138	-0.518399	5.79e-124
ENSCHIT00000010691	ENSCHIG00000000185	2.94e-77	-56.226	3.9e-68
ENSCHIT00000000885	ENSCHIG00000000185	2.94e-77	0.525706	4.08e-67
ENSCHIT00000010980	ENSCHIG00000000185	2.94e-77	-166650	4.82e-68
ENSCHIT00000010204	ENSCHIG00000000185	2.94e-77	15754.9	4.84e-68
ENSCHIT00000000777	ENSCHIG00000000185	2.94e-77	21.9239	6.85e-69
ENSCHIT00000010605	ENSCHIG00000000185	2.94e-77	-45.3159	1.93e-68
ENSCHIT00000010480	ENSCHIG00000000185	2.94e-77	-9.96286	1.71e-67
ENSCHIT00000010983	ENSCHIG00000000185	2.94e-77	0.01511	2.74e-53
ENSCHIT00000000929	ENSCHIG00000000185	2.94e-77	-3.07487	2.1e-67
ENSCHIT00000006875	ENSCHIG00000000187	1.68e-11	14.6029	0.00744782
ENSCHIT00000006413	ENSCHIG00000000187	1.68e-11	24.9645	0.00295448
ENSCHIT00000003381	ENSCHIG00000000187	1.68e-11	8.05405	0.0482214
ENSCHIT00000011398	ENSCHIG00000000189	2.56e-83	-37.8143	3.44e-81
ENSCHIT00000000777	ENSCHIG00000000189	2.56e-83	28.4333	2.76e-80
ENSCHIT00000010980	ENSCHIG00000000189	2.56e-83	997208	2.61e-80
ENSCHIT00000010204	ENSCHIG00000000189	2.56e-83	-94197.7	2.62e-80
ENSCHIT00000011357	ENSCHIG00000000189	2.56e-83	13.7303	8.83e-81
TCONS_00183792	ENSCHIG00000000189	2.56e-83	-1.16e-12	0.0103151
ENSCHIT00000010605	ENSCHIG00000000189	2.56e-83	244.661	5.58e-81
ENSCHIT00000010480	ENSCHIG00000000189	2.56e-83	40.2608	2.98e-78
ENSCHIT00000011312	ENSCHIG00000000189	2.56e-83	-632.923	5.63e-80
ENSCHIT00000011229	ENSCHIG00000000189	2.56e-83	100.584	1.4e-80
TCONS_00311070	ENSCHIG00000000191	2.75e-210	0.174538	1.24e-141
TCONS_00226999	ENSCHIG00000000191	2.75e-210	0.104392	2.1e-140
ENSCHIT00000001657	ENSCHIG00000000191	2.75e-210	-9.52e-12	6.12e-14
ENSCHIT00000010841	ENSCHIG00000000191	2.75e-210	5.56e-12	3.22e-09
ENSCHIT00000006114	ENSCHIG00000000191	2.75e-210	5.44e-17	3.75e-16
ENSCHIT00000009174	ENSCHIG00000000191	2.75e-210	-1.08e-15	1.8e-16
TCONS_00180664	ENSCHIG00000000191	2.75e-210	0.0692887	6.23e-139
ENSCHIT00000001022	ENSCHIG00000000197	8.7e-17	3.35124	9.28e-07
ENSCHIT00000001554	ENSCHIG00000000197	8.7e-17	-1.72909	0.00143939
ENSCHIT00000009806	ENSCHIG00000000197	8.7e-17	1.49399	5.23e-06
ENSCHIT00000003381	ENSCHIG00000000197	8.7e-17	0.281726	0.00691902
ENSCHIT00000005603	ENSCHIG00000000197	8.7e-17	0.316128	0.00380635
TCONS_00168925	ENSCHIG00000000197	8.7e-17	-6.18158	0.0267899
ENSCHIT00000010691	ENSCHIG00000000198	1.2e-150	-110.336	2.48e-142
ENSCHIT00000010684	ENSCHIG00000000198	1.2e-150	-218.159	6.56e-144
ENSCHIT00000010480	ENSCHIG00000000198	1.2e-150	-99.5556	1.54e-140
ENSCHIT00000010204	ENSCHIG00000000198	1.2e-150	98023.3	3.11e-144
ENSCHIT00000010743	ENSCHIG00000000198	1.2e-150	12.9508	2.43e-140
ENSCHIT00000010406	ENSCHIG00000000198	1.2e-150	-106.005	9.96e-136
ENSCHIT00000010983	ENSCHIG00000000198	1.2e-150	46.6535	1.48e-138
ENSCHIT00000010581	ENSCHIG00000000198	1.2e-150	-24.9722	7.98e-142
ENSCHIT00000010980	ENSCHIG00000000198	1.2e-150	-1.03578e+06	3.08e-144
TCONS_00099603	ENSCHIG00000000199	1.65e-196	1.52e-15	1.19e-07
TCONS_00210344	ENSCHIG00000000199	1.65e-196	3.67054	1.88e-106
TCONS_00246494	ENSCHIG00000000199	1.65e-196	-1.27315	1.29e-103
ENSCHIT00000010930	ENSCHIG00000000201	2.49e-08	-9.14304	2.49e-08
ENSCHIT00000003318	ENSCHIG00000000202	2.41e-09	27.443	2.41e-09
ENSCHIT00000001914	ENSCHIG00000000203	5.14e-10	5.47157	0.015272
ENSCHIT00000009035	ENSCHIG00000000203	5.14e-10	5.40712	0.0039686
ENSCHIT00000001651	ENSCHIG00000000204	1.15e-10	0.630854	8.99e-05
ENSCHIT00000006492	ENSCHIG00000000205	3.63e-10	-0.0835165	0.0163147
ENSCHIT00000009643	ENSCHIG00000000205	3.63e-10	8.65546	0.00154406
ENSCHIT00000010480	ENSCHIG00000000206	4.78e-137	-46.3282	1.21e-125
ENSCHIT00000010475	ENSCHIG00000000206	4.78e-137	9.42322	3.95e-125
ENSCHIT00000010691	ENSCHIG00000000206	4.78e-137	-143.721	1.85e-125
TCONS_00078498	ENSCHIG00000000206	4.78e-137	-3.04e-14	0.000420473
ENSCHIT00000010605	ENSCHIG00000000206	4.78e-137	-510.961	3.83e-125
ENSCHIT00000010204	ENSCHIG00000000206	4.78e-137	135.02	2.54e-125
ENSCHIT00000010406	ENSCHIG00000000206	4.78e-137	29.0835	1.26e-126
ENSCHIT00000010466	ENSCHIG00000000206	4.78e-137	3.39157	1.67e-123
ENSCHIT00000010684	ENSCHIG00000000206	4.78e-137	-270.083	1.19e-125
ENSCHIT00000010581	ENSCHIG00000000206	4.78e-137	34.0211	2.55e-125
ENSCHIT00000000875	ENSCHIG00000000207	8.24e-94	10.2063	1.75e-88
ENSCHIT00000001428	ENSCHIG00000000207	8.24e-94	3.97159	2.7e-86
ENSCHIT00000001639	ENSCHIG00000000207	8.24e-94	-7.42222	1.76e-87
ENSCHIT00000001923	ENSCHIG00000000207	8.24e-94	-3.06531	9.82e-82
ENSCHIT00000001673	ENSCHIG00000000207	8.24e-94	-0.427561	2.45e-84
ENSCHIT00000001721	ENSCHIG00000000207	8.24e-94	-16.3132	4.74e-86
ENSCHIT00000002441	ENSCHIG00000000207	8.24e-94	-2.62769	1.86e-86
ENSCHIT00000002069	ENSCHIG00000000207	8.24e-94	1.4361	6.87e-90
ENSCHIT00000000980	ENSCHIG00000000207	8.24e-94	1.94217	1.79e-84
ENSCHIT00000010605	ENSCHIG00000000208	2.53e-158	-11.4969	2.34e-152
ENSCHIT00000010480	ENSCHIG00000000208	2.53e-158	-0.235219	5.82e-144
ENSCHIT00000010466	ENSCHIG00000000208	2.53e-158	-0.464417	6.47e-150
ENSCHIT00000010547	ENSCHIG00000000208	2.53e-158	0.273791	6.04e-145
ENSCHIT00000010204	ENSCHIG00000000208	2.53e-158	2.44893	1.5e-150
TCONS_00078498	ENSCHIG00000000208	2.53e-158	4.12e-16	0.0132737
ENSCHIT00000010406	ENSCHIG00000000208	2.53e-158	-6.20688	5.59e-150
TCONS_00183438	ENSCHIG00000000208	2.53e-158	0.101467	5.2e-139
ENSCHIT00000010475	ENSCHIG00000000208	2.53e-158	0.238428	1.66e-151
ENSCHIT00000010581	ENSCHIG00000000208	2.53e-158	1.1616	3.46e-152
ENSCHIT00000010935	ENSCHIG00000000210	1.02e-08	2.11486	1.02e-08
ENSCHIT00000009455	ENSCHIG00000000212	3.25e-10	3.97312	0.000431182
ENSCHIT00000005511	ENSCHIG00000000212	3.25e-10	-7.12704	1.54e-05
ENSCHIT00000005694	ENSCHIG00000000212	3.25e-10	0.579452	0.00120981
ENSCHIT00000005448	ENSCHIG00000000212	3.25e-10	-0.72174	0.000255368
ENSCHIT00000009361	ENSCHIG00000000212	3.25e-10	10.2682	0.000133132
ENSCHIT00000000779	ENSCHIG00000000213	2.18e-10	-71.8001	0.000518816
ENSCHIT00000001033	ENSCHIG00000000214	4.92e-175	0.461541	1.65e-145
ENSCHIT00000006002	ENSCHIG00000000214	4.92e-175	3.57565	1.63e-161
ENSCHIT00000005497	ENSCHIG00000000214	4.92e-175	-24.7071	4.73e-159
ENSCHIT00000005705	ENSCHIG00000000214	4.92e-175	5.79347	2.27e-162
ENSCHIT00000002637	ENSCHIG00000000214	4.92e-175	5.1592	7.78e-165
ENSCHIT00000002459	ENSCHIG00000000214	4.92e-175	12.7291	4.84e-163
ENSCHIT00000001046	ENSCHIG00000000214	4.92e-175	0.784287	2.37e-160
ENSCHIT00000003603	ENSCHIG00000000214	4.92e-175	13.1646	2.74e-160
ENSCHIT00000001036	ENSCHIG00000000214	4.92e-175	11.5292	4.53e-159
ENSCHIT00000009391	ENSCHIG00000000215	1.53e-11	3.71535	1.4e-05
TCONS_00127698	ENSCHIG00000000215	1.53e-11	-1.143	1.4e-05
ENSCHIT00000010475	ENSCHIG00000000216	7.53e-85	184.21	1.32e-75
TCONS_00183438	ENSCHIG00000000216	7.53e-85	928.356	1.42e-75
TCONS_00014930	ENSCHIG00000000216	7.53e-85	-3.02e-14	0.0441199
ENSCHIT00000010480	ENSCHIG00000000216	7.53e-85	-779.979	1.61e-75
ENSCHIT00000010466	ENSCHIG00000000216	7.53e-85	-275.353	1.36e-75
ENSCHIT00000010684	ENSCHIG00000000216	7.53e-85	-4495.62	1.38e-75
TCONS_00078498	ENSCHIG00000000216	7.53e-85	9.45e-13	0.0124483
ENSCHIT00000010406	ENSCHIG00000000216	7.53e-85	-508.792	5.49e-75
ENSCHIT00000010581	ENSCHIG00000000216	7.53e-85	750.655	1.51e-75
ENSCHIT00000010204	ENSCHIG00000000216	7.53e-85	2223.57	1.51e-75
ENSCHIT00000010605	ENSCHIG00000000216	7.53e-85	-6831.26	1.38e-75
TCONS_00000227	ENSCHIG00000000217	3.79e-18	2.45739	1.2e-16
TCONS_00073476	ENSCHIG00000000217	3.79e-18	5.66e-15	0.00190659
TCONS_00223861	ENSCHIG00000000217	3.79e-18	-4.76e-17	0.0102115
ENSCHIT00000010581	ENSCHIG00000000219	4.31e-158	0.679995	2.67e-151
ENSCHIT00000010605	ENSCHIG00000000219	4.31e-158	-1.98861	4.24e-146
ENSCHIT00000010406	ENSCHIG00000000219	4.31e-158	-0.0909805	3.33e-132
ENSCHIT00000010466	ENSCHIG00000000219	4.31e-158	-0.248112	5.36e-149
ENSCHIT00000010480	ENSCHIG00000000219	4.31e-158	0.971651	9.73e-151
ENSCHIT00000010204	ENSCHIG00000000219	4.31e-158	-0.949407	4.54e-148
TCONS_00183438	ENSCHIG00000000219	4.31e-158	0.431697	7.09e-146
ENSCHIT00000010191	ENSCHIG00000000219	4.31e-158	0.00464998	4.4e-130
ENSCHIT00000010475	ENSCHIG00000000219	4.31e-158	0.0444931	1.28e-145
TCONS_00323601	ENSCHIG00000000219	4.31e-158	9.24e-18	0.0356273
ENSCHIT00000007226	ENSCHIG00000000220	7.97e-178	0.00723317	1.09e-163
ENSCHIT00000005313	ENSCHIG00000000220	7.97e-178	0.0165051	7.67e-166
ENSCHIT00000007285	ENSCHIG00000000220	7.97e-178	0.433233	1.29e-166
ENSCHIT00000001145	ENSCHIG00000000220	7.97e-178	-0.0250904	5.57e-163
ENSCHIT00000002367	ENSCHIG00000000220	7.97e-178	0.00952623	1.33e-155
ENSCHIT00000003392	ENSCHIG00000000220	7.97e-178	0.0923326	2.16e-173
ENSCHIT00000003293	ENSCHIG00000000220	7.97e-178	-0.120812	1.54e-167
ENSCHIT00000007134	ENSCHIG00000000220	7.97e-178	-0.0115155	2.34e-161
ENSCHIT00000010505	ENSCHIG00000000220	7.97e-178	1.20181	3.75e-164
ENSCHIT00000010466	ENSCHIG00000000222	3.16e-113	-14.2726	5.14e-105
TCONS_00183438	ENSCHIG00000000222	3.16e-113	50.0076	4.42e-105
ENSCHIT00000010581	ENSCHIG00000000222	3.16e-113	38.6985	5.1e-105
ENSCHIT00000010406	ENSCHIG00000000222	3.16e-113	-18.87	5.42e-104
ENSCHIT00000010684	ENSCHIG00000000222	3.16e-113	-236.894	4.1e-105
ENSCHIT00000010204	ENSCHIG00000000222	3.16e-113	116.228	4e-105
ENSCHIT00000010605	ENSCHIG00000000222	3.16e-113	-352.234	4.96e-105
ENSCHIT00000010475	ENSCHIG00000000222	3.16e-113	9.4714	4.86e-105
ENSCHIT00000010480	ENSCHIG00000000222	3.16e-113	-41.1337	3.64e-105
ENSCHIT00000007150	ENSCHIG00000000223	1.77e-11	1.71031	0.000867728
ENSCHIT00000009490	ENSCHIG00000000223	1.77e-11	-6.588	7.01e-05
ENSCHIT00000010480	ENSCHIG00000000224	7.12e-54	-37.8469	7e-47
ENSCHIT00000010980	ENSCHIG00000000224	7.12e-54	110403	4.82e-49
ENSCHIT00000000980	ENSCHIG00000000224	7.12e-54	-4.01512	1.66e-50
ENSCHIT00000000875	ENSCHIG00000000224	7.12e-54	6.37819	2.3e-47
ENSCHIT00000000777	ENSCHIG00000000224	7.12e-54	59.4284	6.46e-49
ENSCHIT00000000929	ENSCHIG00000000224	7.12e-54	-12.146	3.15e-46
ENSCHIT00000000999	ENSCHIG00000000224	7.12e-54	-30.3385	8e-48
ENSCHIT00000000955	ENSCHIG00000000224	7.12e-54	-1.61304	2.37e-46
ENSCHIT00000010204	ENSCHIG00000000224	7.12e-54	-10379.7	4.96e-49
ENSCHIT00000007824	ENSCHIG00000000225	2.93e-13	1.93902	0.000885343
TCONS_00375554	ENSCHIG00000000225	2.93e-13	0.434067	0.00735438
ENSCHIT00000007158	ENSCHIG00000000225	2.93e-13	0.831835	3.43e-05
ENSCHIT00000006732	ENSCHIG00000000225	2.93e-13	-3.11935	0.00523992
ENSCHIT00000000929	ENSCHIG00000000228	2.12e-80	-3.07436	4.97e-72
ENSCHIT00000001639	ENSCHIG00000000228	2.12e-80	0.407182	2.59e-69
ENSCHIT00000000875	ENSCHIG00000000228	2.12e-80	1.22243	3.44e-75
ENSCHIT00000001134	ENSCHIG00000000228	2.12e-80	-1.51223	2.97e-69
ENSCHIT00000001585	ENSCHIG00000000228	2.12e-80	1.63646	3.26e-69
ENSCHIT00000001330	ENSCHIG00000000228	2.12e-80	-0.423481	4.18e-72
ENSCHIT00000001144	ENSCHIG00000000228	2.12e-80	8.89606	8.49e-71
ENSCHIT00000010847	ENSCHIG00000000228	2.12e-80	-2.13694	1.37e-71
ENSCHIT00000001428	ENSCHIG00000000228	2.12e-80	-1.01198	1.74e-73
ENSCHIT00000000987	ENSCHIG00000000230	1.12e-154	4.6656	1.84e-147
ENSCHIT00000001849	ENSCHIG00000000230	1.12e-154	-231.521	4.63e-151
ENSCHIT00000001732	ENSCHIG00000000230	1.12e-154	4.84828	1.09e-147
ENSCHIT00000011229	ENSCHIG00000000230	1.12e-154	-20.7865	4.54e-150
ENSCHIT00000002866	ENSCHIG00000000230	1.12e-154	68.1111	1.35e-146
ENSCHIT00000002687	ENSCHIG00000000230	1.12e-154	195.912	1.33e-151
ENSCHIT00000002295	ENSCHIG00000000230	1.12e-154	-313754	2.74e-145
ENSCHIT00000001639	ENSCHIG00000000230	1.12e-154	-0.914588	1.39e-144
ENSCHIT00000001397	ENSCHIG00000000230	1.12e-154	44.7029	1.81e-148
ENSCHIT00000009776	ENSCHIG00000000232	1.86e-11	0.158273	0.0180481
ENSCHIT00000001059	ENSCHIG00000000232	1.86e-11	1.03529	0.000231732
ENSCHIT00000010978	ENSCHIG00000000232	1.86e-11	-0.138558	0.00590578
ENSCHIT00000001968	ENSCHIG00000000232	1.86e-11	-0.610802	0.0304929
ENSCHIT00000010321	ENSCHIG00000000232	1.86e-11	-1.15877	0.00324561
ENSCHIT00000006394	ENSCHIG00000000232	1.86e-11	0.0595299	5.64e-05
TCONS_00183438	ENSCHIG00000000233	2.01e-53	5.32788	7.52e-44
ENSCHIT00000010942	ENSCHIG00000000233	2.01e-53	-1.84301	9.96e-46
ENSCHIT00000010581	ENSCHIG00000000233	2.01e-53	-4.54737	7.39e-45
ENSCHIT00000010980	ENSCHIG00000000233	2.01e-53	-122849	1.1e-46
ENSCHIT00000010204	ENSCHIG00000000233	2.01e-53	11725.8	1.08e-46
ENSCHIT00000010475	ENSCHIG00000000233	2.01e-53	-8.31203	2.93e-47
ENSCHIT00000010605	ENSCHIG00000000233	2.01e-53	245.954	6.44e-47
ENSCHIT00000010480	ENSCHIG00000000233	2.01e-53	-49.4264	6.5e-48
ENSCHIT00000010406	ENSCHIG00000000233	2.01e-53	-116.886	1.05e-45
TCONS_00073476	ENSCHIG00000000234	1.05e-17	2.45e-15	0.0127985
TCONS_00000227	ENSCHIG00000000234	1.05e-17	2.59118	3.33e-16
ENSCHIT00000000875	ENSCHIG00000000235	5.24e-96	17.4235	1.29e-86
ENSCHIT00000001428	ENSCHIG00000000235	5.24e-96	15.1348	4.67e-86
ENSCHIT00000002670	ENSCHIG00000000235	5.24e-96	-90.5407	6.62e-88
ENSCHIT00000006112	ENSCHIG00000000235	5.24e-96	-3.17549	7.67e-88
ENSCHIT00000006999	ENSCHIG00000000235	5.24e-96	42.6994	1.1e-86
ENSCHIT00000001721	ENSCHIG00000000235	5.24e-96	5.25364	5.63e-80
ENSCHIT00000000955	ENSCHIG00000000235	5.24e-96	53.5953	9.53e-87
ENSCHIT00000005742	ENSCHIG00000000235	5.24e-96	-4.40269	2.7e-88
ENSCHIT00000003293	ENSCHIG00000000235	5.24e-96	85.3842	3.71e-87
TCONS_00014930	ENSCHIG00000000235	5.24e-96	-1e-15	0.00333323
ENSCHIT00000010406	ENSCHIG00000000237	1.4e-126	-132.202	2.43e-118
ENSCHIT00000010480	ENSCHIG00000000237	1.4e-126	-20.9252	2.25e-115
ENSCHIT00000010204	ENSCHIG00000000237	1.4e-126	57.3769	7.64e-117
ENSCHIT00000010466	ENSCHIG00000000237	1.4e-126	5.21532	4.36e-115
ENSCHIT00000010475	ENSCHIG00000000237	1.4e-126	-0.529138	3.81e-108
TCONS_00014930	ENSCHIG00000000237	1.4e-126	5.1e-16	0.00705858
ENSCHIT00000010191	ENSCHIG00000000237	1.4e-126	9.89521	2.38e-115
TCONS_00183438	ENSCHIG00000000237	1.4e-126	-22.2598	1.19e-117
ENSCHIT00000010581	ENSCHIG00000000237	1.4e-126	-1.04997	1.23e-108
ENSCHIT00000010605	ENSCHIG00000000237	1.4e-126	-4.19219	9.38e-103
ENSCHIT00000000941	ENSCHIG00000000239	2.86e-09	-2.53214	2.86e-09
ENSCHIT00000003681	ENSCHIG00000000240	2.65e-11	-82.7133	0.000424083
ENSCHIT00000009535	ENSCHIG00000000240	2.65e-11	-108.698	0.00249543
ENSCHIT00000009391	ENSCHIG00000000241	2.59e-09	0.0916019	0.0116267
ENSCHIT00000005139	ENSCHIG00000000241	2.59e-09	-0.193059	0.0049205
TCONS_00309905	ENSCHIG00000000242	1.1e-110	-1.71e-15	0.025199
ENSCHIT00000001673	ENSCHIG00000000242	1.1e-110	-0.900514	3.29e-102
ENSCHIT00000010847	ENSCHIG00000000242	1.1e-110	22.1733	5.75e-105
ENSCHIT00000001134	ENSCHIG00000000242	1.1e-110	-34.5925	5.7e-103
ENSCHIT00000001133	ENSCHIG00000000242	1.1e-110	2.35299	1.57e-100
ENSCHIT00000001844	ENSCHIG00000000242	1.1e-110	-10.4715	1.83e-97
ENSCHIT00000001313	ENSCHIG00000000242	1.1e-110	-101.709	4.77e-103
ENSCHIT00000001217	ENSCHIG00000000242	1.1e-110	10.7489	1.14e-101
TCONS_00034550	ENSCHIG00000000242	1.1e-110	8.1e-15	0.0044447
ENSCHIT00000002663	ENSCHIG00000000242	1.1e-110	-3.00203	1.88e-98
ENSCHIT00000001923	ENSCHIG00000000242	1.1e-110	58.3585	1.58e-103
ENSCHIT00000010475	ENSCHIG00000000244	1.49e-95	1.33196	1.35e-84
ENSCHIT00000010684	ENSCHIG00000000244	1.49e-95	-66.1661	4.27e-86
ENSCHIT00000010204	ENSCHIG00000000244	1.49e-95	40.0168	1.41e-85
ENSCHIT00000010406	ENSCHIG00000000244	1.49e-95	-92.777	9.12e-87
TCONS_00183438	ENSCHIG00000000244	1.49e-95	-31.033	6.06e-90
ENSCHIT00000010480	ENSCHIG00000000244	1.49e-95	-13.4987	1.06e-84
ENSCHIT00000010605	ENSCHIG00000000244	1.49e-95	-6.95331	2.07e-79
ENSCHIT00000010581	ENSCHIG00000000244	1.49e-95	0.845249	1.66e-80
ENSCHIT00000010191	ENSCHIG00000000244	1.49e-95	17.3112	3.68e-88
ENSCHIT00000004836	ENSCHIG00000000245	9.06e-12	-14.3023	1.55e-05
TCONS_00002961	ENSCHIG00000000245	9.06e-12	-0.116697	3.27e-05
ENSCHIT00000000836	ENSCHIG00000000247	8.48e-158	261.568	1.03e-144
ENSCHIT00000007123	ENSCHIG00000000247	8.48e-158	-224.14	1.15e-144
ENSCHIT00000003172	ENSCHIG00000000247	8.48e-158	-63.9781	1.27e-144
ENSCHIT00000004710	ENSCHIG00000000247	8.48e-158	35.803	1.07e-144
ENSCHIT00000006999	ENSCHIG00000000247	8.48e-158	-28.4558	9.99e-145
ENSCHIT00000007163	ENSCHIG00000000247	8.48e-158	-262.652	1.09e-144
ENSCHIT00000007134	ENSCHIG00000000247	8.48e-158	-46.8296	9.52e-145
ENSCHIT00000006695	ENSCHIG00000000247	8.48e-158	22.2244	9.08e-145
ENSCHIT00000008138	ENSCHIG00000000247	8.48e-158	26.4568	1.23e-144
ENSCHIT00000005375	ENSCHIG00000000248	2.77e-08	-23.6502	2.77e-08
ENSCHIT00000007805	ENSCHIG00000000249	3.69e-12	0.209698	2.69e-06
ENSCHIT00000001000	ENSCHIG00000000249	3.69e-12	0.0490124	0.00128725
TCONS_00126713	ENSCHIG00000000250	6e-14	-3.14605	0.0050492
ENSCHIT00000002785	ENSCHIG00000000250	6e-14	-2.34585	1.64e-05
ENSCHIT00000009035	ENSCHIG00000000250	6e-14	-4.44941	0.0495819
ENSCHIT00000003184	ENSCHIG00000000250	6e-14	103.038	5.94e-05
ENSCHIT00000007419	ENSCHIG00000000254	6.9e-09	-13.1425	0.0199676
ENSCHIT00000001740	ENSCHIG00000000254	6.9e-09	-1.6913	0.0109527
ENSCHIT00000003184	ENSCHIG00000000255	4.74e-11	4.96638	0.0219252
ENSCHIT00000009035	ENSCHIG00000000255	4.74e-11	1.30409	0.00754
ENSCHIT00000005991	ENSCHIG00000000255	4.74e-11	1.39606	0.0420643
ENSCHIT00000000872	ENSCHIG00000000257	7.31e-141	0.666312	1.41e-135
ENSCHIT00000000929	ENSCHIG00000000257	7.31e-141	4.63866	5.1e-132
TCONS_00062993	ENSCHIG00000000257	7.31e-141	-3.43e-15	0.00101901
ENSCHIT00000000999	ENSCHIG00000000257	7.31e-141	-15.4447	6.92e-136
TCONS_00183438	ENSCHIG00000000257	7.31e-141	-12.0635	2.84e-132
ENSCHIT00000011358	ENSCHIG00000000257	7.31e-141	0.0941913	4.16e-122
ENSCHIT00000001639	ENSCHIG00000000257	7.31e-141	3.78423	4.04e-136
ENSCHIT00000010406	ENSCHIG00000000257	7.31e-141	47.3785	8.42e-134
ENSCHIT00000000980	ENSCHIG00000000257	7.31e-141	1.93093	1.15e-132
ENSCHIT00000001652	ENSCHIG00000000257	7.31e-141	-26614.7	3.68e-135
TCONS_00147634	ENSCHIG00000000258	2.99e-15	0.074612	0.0293816
ENSCHIT00000005259	ENSCHIG00000000258	2.99e-15	0.154752	0.000213357
ENSCHIT00000007322	ENSCHIG00000000258	2.99e-15	0.336764	0.000370936
ENSCHIT00000005119	ENSCHIG00000000258	2.99e-15	-146667	4.37e-07
ENSCHIT00000007526	ENSCHIG00000000258	2.99e-15	-0.141996	3.63e-05
ENSCHIT00000002021	ENSCHIG00000000258	2.99e-15	0.820995	3.52e-08
ENSCHIT00000003555	ENSCHIG00000000258	2.99e-15	0.141098	0.000551126
ENSCHIT00000003136	ENSCHIG00000000258	2.99e-15	0.0635991	0.00200991
ENSCHIT00000009369	ENSCHIG00000000259	3.27e-08	0.245773	0.0236523
ENSCHIT00000010581	ENSCHIG00000000264	3.63e-130	3.06e-16	0.019884
ENSCHIT00000010466	ENSCHIG00000000264	3.63e-130	-2.31e-16	0.0223479
ENSCHIT00000010204	ENSCHIG00000000264	3.63e-130	0.391096	1.54e-116
TCONS_00183438	ENSCHIG00000000264	3.63e-130	7.43e-16	0.00213683
TCONS_00014930	ENSCHIG00000000264	3.63e-130	2.51e-18	0.0448779
ENSCHIT00000006196	ENSCHIG00000000265	3.09e-11	0.484846	8.2e-06
ENSCHIT00000001522	ENSCHIG00000000269	1.1e-12	-6.58288	6.46e-05
ENSCHIT00000010218	ENSCHIG00000000269	1.1e-12	3.11147	0.000317264
ENSCHIT00000006004	ENSCHIG00000000269	1.1e-12	-4.43936	0.0136849
ENSCHIT00000010406	ENSCHIG00000000271	4.74e-100	134.146	4.07e-88
ENSCHIT00000010684	ENSCHIG00000000271	4.74e-100	1231.92	6.81e-89
TCONS_00183438	ENSCHIG00000000271	4.74e-100	-260.788	5.99e-89
ENSCHIT00000010475	ENSCHIG00000000271	4.74e-100	-51.4107	5.75e-89
ENSCHIT00000010605	ENSCHIG00000000271	4.74e-100	1921.19	5.71e-89
ENSCHIT00000010480	ENSCHIG00000000271	4.74e-100	211.884	8.41e-89
ENSCHIT00000010581	ENSCHIG00000000271	4.74e-100	-210.47	6.46e-89
ENSCHIT00000010204	ENSCHIG00000000271	4.74e-100	-597.211	8.54e-89
ENSCHIT00000010466	ENSCHIG00000000271	4.74e-100	77.6558	5.61e-89
TCONS_00000227	ENSCHIG00000000272	6.51e-18	0.668976	2.07e-16
TCONS_00223861	ENSCHIG00000000272	6.51e-18	-6.44e-18	0.0352721
TCONS_00073476	ENSCHIG00000000272	6.51e-18	7.83e-16	0.00644494
TCONS_00183438	ENSCHIG00000000273	1.9e-165	-26.7291	2.19e-153
ENSCHIT00000010427	ENSCHIG00000000273	1.9e-165	0.368492	2.48e-154
ENSCHIT00000010605	ENSCHIG00000000273	1.9e-165	-47.2181	1.02e-154
ENSCHIT00000010480	ENSCHIG00000000273	1.9e-165	-29.8903	1.3e-152
ENSCHIT00000010406	ENSCHIG00000000273	1.9e-165	-126.059	3.21e-153
ENSCHIT00000010204	ENSCHIG00000000273	1.9e-165	50.191	6.92e-153
ENSCHIT00000010691	ENSCHIG00000000273	1.9e-165	59.9251	5.55e-153
ENSCHIT00000010581	ENSCHIG00000000273	1.9e-165	7.97442	8.93e-154
ENSCHIT00000010618	ENSCHIG00000000273	1.9e-165	-14.1738	1.31e-152
ENSCHIT00000010204	ENSCHIG00000000274	2.01e-156	35.1675	1.61e-148
TCONS_00078498	ENSCHIG00000000274	2.01e-156	1.3e-14	4.35e-07
ENSCHIT00000010480	ENSCHIG00000000274	2.01e-156	-24.2541	2.5e-148
ENSCHIT00000010466	ENSCHIG00000000274	2.01e-156	-0.834455	2.33e-145
ENSCHIT00000010605	ENSCHIG00000000274	2.01e-156	20.6835	1.28e-145
ENSCHIT00000010406	ENSCHIG00000000274	2.01e-156	-60.6179	4.71e-149
ENSCHIT00000010743	ENSCHIG00000000274	2.01e-156	-1.35148	7e-147
ENSCHIT00000010505	ENSCHIG00000000274	2.01e-156	173.791	1.25e-149
ENSCHIT00000010691	ENSCHIG00000000274	2.01e-156	42.4287	5.12e-150
ENSCHIT00000010475	ENSCHIG00000000274	2.01e-156	0.411039	1.01e-145
ENSCHIT00000009109	ENSCHIG00000000277	3.03e-144	-1.9615	2.12e-129
ENSCHIT00000009881	ENSCHIG00000000277	3.03e-144	5.76787	4.26e-136
ENSCHIT00000009730	ENSCHIG00000000277	3.03e-144	-44.5404	3.5e-131
ENSCHIT00000000875	ENSCHIG00000000277	3.03e-144	5.29992	9.18e-130
ENSCHIT00000001721	ENSCHIG00000000277	3.03e-144	47.7811	3.11e-133
ENSCHIT00000001428	ENSCHIG00000000277	3.03e-144	-19.4028	1.69e-134
ENSCHIT00000000980	ENSCHIG00000000277	3.03e-144	-16.8438	4.87e-135
ENSCHIT00000009112	ENSCHIG00000000277	3.03e-144	2.69661	7.85e-134
ENSCHIT00000009391	ENSCHIG00000000277	3.03e-144	9.48039	8.22e-136
ENSCHIT00000007158	ENSCHIG00000000278	1.41e-08	8.95116	0.0148556
ENSCHIT00000001313	ENSCHIG00000000279	1.05e-128	36.9559	2.14e-115
ENSCHIT00000001134	ENSCHIG00000000279	1.05e-128	77.0202	1.88e-117
ENSCHIT00000001133	ENSCHIG00000000279	1.05e-128	-1.29025	6.51e-111
ENSCHIT00000001146	ENSCHIG00000000279	1.05e-128	2.99912	1.01e-109
ENSCHIT00000001019	ENSCHIG00000000279	1.05e-128	-31.0184	7.82e-120
ENSCHIT00000001340	ENSCHIG00000000279	1.05e-128	11.6976	8.42e-116
ENSCHIT00000001217	ENSCHIG00000000279	1.05e-128	30.2119	2.09e-120
ENSCHIT00000010847	ENSCHIG00000000279	1.05e-128	-37.9247	5.68e-116
ENSCHIT00000001673	ENSCHIG00000000279	1.05e-128	-0.666664	1.51e-116
ENSCHIT00000006097	ENSCHIG00000000280	1.62e-11	-2.13159	7.56e-05
ENSCHIT00000002388	ENSCHIG00000000280	1.62e-11	3.24525	0.0179286
ENSCHIT00000006395	ENSCHIG00000000280	1.62e-11	1.72045	8.59e-06
ENSCHIT00000005349	ENSCHIG00000000281	6.84e-09	1.78565	6.84e-09
ENSCHIT00000004799	ENSCHIG00000000282	4.72e-11	0.263402	0.000388327
ENSCHIT00000005705	ENSCHIG00000000282	4.72e-11	-3.91862	0.0451327
ENSCHIT00000008199	ENSCHIG00000000282	4.72e-11	-2.09965	0.00451377
ENSCHIT00000002189	ENSCHIG00000000282	4.72e-11	10.9787	0.011902
ENSCHIT00000003444	ENSCHIG00000000283	5.95e-11	2.51971	0.000335147
ENSCHIT00000006609	ENSCHIG00000000283	5.95e-11	2.37032	2.47e-05
ENSCHIT00000005362	ENSCHIG00000000283	5.95e-11	-15.9451	0.00121812
ENSCHIT00000001986	ENSCHIG00000000285	1.34e-160	14.941	1.07e-154
TCONS_00253686	ENSCHIG00000000285	1.34e-160	1.17e-15	1.39e-08
ENSCHIT00000001397	ENSCHIG00000000285	1.34e-160	30.8614	8.65e-150
ENSCHIT00000001041	ENSCHIG00000000285	1.34e-160	3.66339	4.59e-151
ENSCHIT00000005433	ENSCHIG00000000285	1.34e-160	-17.1572	3.03e-153
ENSCHIT00000003264	ENSCHIG00000000285	1.34e-160	-13.1103	1.98e-153
ENSCHIT00000003064	ENSCHIG00000000285	1.34e-160	2.7391	1.02e-151
ENSCHIT00000009333	ENSCHIG00000000285	1.34e-160	-29.0029	4.09e-154
ENSCHIT00000010914	ENSCHIG00000000285	1.34e-160	-7.33284	7.01e-150
ENSCHIT00000007734	ENSCHIG00000000285	1.34e-160	1.27569	1.14e-149
ENSCHIT00000007056	ENSCHIG00000000286	4.24e-11	8.65491	0.000150725
ENSCHIT00000007332	ENSCHIG00000000286	4.24e-11	-46.7658	0.00612061
ENSCHIT00000010691	ENSCHIG00000000287	8.45e-94	8.28563	3.27e-78
ENSCHIT00000010480	ENSCHIG00000000287	8.45e-94	109.659	2.07e-86
ENSCHIT00000010581	ENSCHIG00000000287	8.45e-94	3.27672	2.39e-80
ENSCHIT00000010605	ENSCHIG00000000287	8.45e-94	331.178	6.67e-85
ENSCHIT00000010406	ENSCHIG00000000287	8.45e-94	-122.175	1.39e-84
ENSCHIT00000010743	ENSCHIG00000000287	8.45e-94	-17.6354	2.81e-83
ENSCHIT00000010466	ENSCHIG00000000287	8.45e-94	13.1953	1.01e-85
ENSCHIT00000010204	ENSCHIG00000000287	8.45e-94	-136.28	7.77e-87
ENSCHIT00000010475	ENSCHIG00000000287	8.45e-94	-4.57236	2.05e-82
TCONS_00291695	ENSCHIG00000000290	7.59e-105	1.37e-11	0.0147355
ENSCHIT00000010847	ENSCHIG00000000290	7.59e-105	-114.7	4.21e-93
ENSCHIT00000010605	ENSCHIG00000000290	7.59e-105	-2220.76	1.62e-92
ENSCHIT00000011229	ENSCHIG00000000290	7.59e-105	39.8908	1.96e-94
ENSCHIT00000010321	ENSCHIG00000000290	7.59e-105	-1226.59	7.09e-93
ENSCHIT00000010204	ENSCHIG00000000290	7.59e-105	75512.8	8.6e-93
ENSCHIT00000010581	ENSCHIG00000000290	7.59e-105	105.336	1.04e-93
ENSCHIT00000010480	ENSCHIG00000000290	7.59e-105	-410.698	9.43e-93
ENSCHIT00000010980	ENSCHIG00000000290	7.59e-105	-793369	8.55e-93
ENSCHIT00000010475	ENSCHIG00000000290	7.59e-105	81.5818	4.73e-93
ENSCHIT00000007405	ENSCHIG00000000291	6.65e-09	0.135372	0.00945318
ENSCHIT00000001860	ENSCHIG00000000291	6.65e-09	0.378687	0.00840173
ENSCHIT00000010300	ENSCHIG00000000292	5.52e-11	19.9697	0.0480756
ENSCHIT00000002354	ENSCHIG00000000292	5.52e-11	4.86385	0.000113848
ENSCHIT00000009990	ENSCHIG00000000293	1.25e-08	30.4075	1.25e-08
ENSCHIT00000005820	ENSCHIG00000000297	2.49e-09	3.78703	0.0394006
ENSCHIT00000010015	ENSCHIG00000000300	1.54e-08	-1.04273	1.54e-08
ENSCHIT00000006029	ENSCHIG00000000302	1.41e-08	-1.13606	1.41e-08
ENSCHIT00000010204	ENSCHIG00000000303	6.69e-155	-92.8772	7.63e-139
ENSCHIT00000010605	ENSCHIG00000000303	6.69e-155	318.21	2.04e-138
ENSCHIT00000010581	ENSCHIG00000000303	6.69e-155	-18.4102	1.9e-137
ENSCHIT00000010406	ENSCHIG00000000303	6.69e-155	32.9982	6.03e-144
ENSCHIT00000010475	ENSCHIG00000000303	6.69e-155	-5.64271	6.89e-138
ENSCHIT00000010480	ENSCHIG00000000303	6.69e-155	34.3291	1.96e-139
TCONS_00183438	ENSCHIG00000000303	6.69e-155	-12.0051	6.48e-140
ENSCHIT00000010691	ENSCHIG00000000303	6.69e-155	32.8522	2.39e-135
ENSCHIT00000010684	ENSCHIG00000000303	6.69e-155	155.341	2.47e-138
ENSCHIT00000010480	ENSCHIG00000000304	4.64e-94	37.3024	7.33e-90
ENSCHIT00000010204	ENSCHIG00000000304	4.64e-94	-33.9788	1.16e-88
TCONS_00319548	ENSCHIG00000000304	4.64e-94	-4.2e-16	0.0486721
ENSCHIT00000010605	ENSCHIG00000000304	4.64e-94	-101.453	1.82e-90
ENSCHIT00000010406	ENSCHIG00000000304	4.64e-94	-111.222	2.26e-89
TCONS_00078498	ENSCHIG00000000304	4.64e-94	1.39e-14	0.0405092
ENSCHIT00000010475	ENSCHIG00000000304	4.64e-94	3.84354	6.14e-91
ENSCHIT00000010691	ENSCHIG00000000304	4.64e-94	29.3441	7.76e-88
ENSCHIT00000010773	ENSCHIG00000000304	4.64e-94	15.1871	1e-88
ENSCHIT00000010743	ENSCHIG00000000304	4.64e-94	-4.4442	1.57e-88
TCONS_00183438	ENSCHIG00000000304	4.64e-94	-22.3261	1.56e-90
ENSCHIT00000002778	ENSCHIG00000000306	1.04e-14	4.69115	2.98e-05
ENSCHIT00000006059	ENSCHIG00000000306	1.04e-14	1.38446	2e-05
ENSCHIT00000008144	ENSCHIG00000000306	1.04e-14	-7.99009	0.0144231
ENSCHIT00000002059	ENSCHIG00000000306	1.04e-14	1.40399	8.68e-07
ENSCHIT00000005468	ENSCHIG00000000307	6.89e-10	-6.7595	6.89e-10
ENSCHIT00000006899	ENSCHIG00000000309	9.71e-20	0.189073	9.14e-09
TCONS_00183436	ENSCHIG00000000309	9.71e-20	1.32431	1.66e-08
ENSCHIT00000010983	ENSCHIG00000000311	5.63e-175	1.00945	5.42e-161
ENSCHIT00000010743	ENSCHIG00000000311	5.63e-175	-0.0343592	2.77e-150
ENSCHIT00000011357	ENSCHIG00000000311	5.63e-175	0.290357	1.19e-159
ENSCHIT00000010581	ENSCHIG00000000311	5.63e-175	-0.132856	1.11e-155
ENSCHIT00000010691	ENSCHIG00000000311	5.63e-175	-0.407462	5.43e-156
ENSCHIT00000010480	ENSCHIG00000000311	5.63e-175	-0.730743	2.01e-162
ENSCHIT00000011312	ENSCHIG00000000311	5.63e-175	-0.492074	1.12e-159
ENSCHIT00000010406	ENSCHIG00000000311	5.63e-175	-0.903734	1.07e-161
ENSCHIT00000010505	ENSCHIG00000000311	5.63e-175	1.02091	4.76e-153
ENSCHIT00000005239	ENSCHIG00000000312	1.78e-10	73.817	1.78e-10
ENSCHIT00000001615	ENSCHIG00000000313	6.7e-177	0.145424	1.12e-157
ENSCHIT00000011016	ENSCHIG00000000313	6.7e-177	0.00522445	2.74e-165
ENSCHIT00000000810	ENSCHIG00000000313	6.7e-177	0.0101159	8.33e-147
ENSCHIT00000004773	ENSCHIG00000000313	6.7e-177	-0.352132	8.74e-158
ENSCHIT00000003382	ENSCHIG00000000313	6.7e-177	-0.13376	1.85e-153
ENSCHIT00000001247	ENSCHIG00000000313	6.7e-177	-0.274315	1.71e-161
ENSCHIT00000001255	ENSCHIG00000000313	6.7e-177	0.413733	1.66e-158
ENSCHIT00000000998	ENSCHIG00000000313	6.7e-177	0.241128	1.28e-158
ENSCHIT00000001217	ENSCHIG00000000313	6.7e-177	-0.41592	7.59e-161
ENSCHIT00000005468	ENSCHIG00000000315	1.99e-09	-146.824	0.00659594
ENSCHIT00000001601	ENSCHIG00000000315	1.99e-09	958.273	0.0405477
ENSCHIT00000002397	ENSCHIG00000000317	2.57e-178	-2.49053	8.92e-164
ENSCHIT00000000895	ENSCHIG00000000317	2.57e-178	5.35551	2.14e-167
ENSCHIT00000010228	ENSCHIG00000000317	2.57e-178	7.3771	1.31e-163
ENSCHIT00000001146	ENSCHIG00000000317	2.57e-178	4.0937	8.57e-168
ENSCHIT00000001422	ENSCHIG00000000317	2.57e-178	-0.450479	1.44e-165
ENSCHIT00000010404	ENSCHIG00000000317	2.57e-178	-6.04119	9.25e-165
ENSCHIT00000003184	ENSCHIG00000000317	2.57e-178	-10.1273	4.7e-167
ENSCHIT00000000865	ENSCHIG00000000317	2.57e-178	-0.289615	4.62e-165
ENSCHIT00000002352	ENSCHIG00000000317	2.57e-178	0.461293	5.14e-167
ENSCHIT00000010980	ENSCHIG00000000319	4.18e-40	-481686	8.59e-37
ENSCHIT00000010204	ENSCHIG00000000319	4.18e-40	45936.3	8.45e-37
ENSCHIT00000011358	ENSCHIG00000000319	4.18e-40	69.1903	9.09e-38
ENSCHIT00000010983	ENSCHIG00000000319	4.18e-40	679.486	1.42e-37
ENSCHIT00000010847	ENSCHIG00000000319	4.18e-40	-113.839	1.44e-37
TCONS_00183438	ENSCHIG00000000319	4.18e-40	347.305	3.04e-37
ENSCHIT00000010406	ENSCHIG00000000319	4.18e-40	-831.637	1.78e-37
ENSCHIT00000010480	ENSCHIG00000000319	4.18e-40	-649.75	1.45e-37
ENSCHIT00000010605	ENSCHIG00000000319	4.18e-40	-643.023	1.21e-37
ENSCHIT00000010406	ENSCHIG00000000320	8.3e-150	-37.5513	2.64e-140
ENSCHIT00000010475	ENSCHIG00000000320	8.3e-150	23.0371	8.82e-138
ENSCHIT00000010691	ENSCHIG00000000320	8.3e-150	-206.206	1.24e-137
TCONS_00183438	ENSCHIG00000000320	8.3e-150	37.1734	3.3e-136
ENSCHIT00000010605	ENSCHIG00000000320	8.3e-150	-994.591	1.04e-137
ENSCHIT00000010581	ENSCHIG00000000320	8.3e-150	85.1766	7.07e-138
ENSCHIT00000010480	ENSCHIG00000000320	8.3e-150	-91.2598	6.76e-137
ENSCHIT00000010204	ENSCHIG00000000320	8.3e-150	281	3.9e-137
ENSCHIT00000010684	ENSCHIG00000000320	8.3e-150	-589.576	2.24e-137
ENSCHIT00000005875	ENSCHIG00000000321	8.47e-09	31.5246	8.47e-09
ENSCHIT00000001397	ENSCHIG00000000322	4.97e-158	-1.72262	3.92e-141
ENSCHIT00000010684	ENSCHIG00000000322	4.97e-158	-115.712	6.51e-146
ENSCHIT00000001882	ENSCHIG00000000322	4.97e-158	4.96288	2.41e-146
ENSCHIT00000001056	ENSCHIG00000000322	4.97e-158	-5.09441	1.08e-143
ENSCHIT00000001046	ENSCHIG00000000322	4.97e-158	-1.8138	2.45e-145
ENSCHIT00000011312	ENSCHIG00000000322	4.97e-158	-41.3165	7.03e-145
ENSCHIT00000001841	ENSCHIG00000000322	4.97e-158	5.81247	2.21e-145
ENSCHIT00000001578	ENSCHIG00000000322	4.97e-158	5.00031	2.28e-145
ENSCHIT00000001036	ENSCHIG00000000322	4.97e-158	-22.6083	1.07e-144
TCONS_00347340	ENSCHIG00000000323	2.93e-161	6.7413	3.37e-151
ENSCHIT00000001549	ENSCHIG00000000323	2.93e-161	0.439167	4.89e-150
ENSCHIT00000007397	ENSCHIG00000000323	2.93e-161	0.332212	9.09e-156
TCONS_00199084	ENSCHIG00000000323	2.93e-161	-1.70592	3.88e-153
TCONS_00052259	ENSCHIG00000000323	2.93e-161	22.025	4.15e-153
ENSCHIT00000000991	ENSCHIG00000000323	2.93e-161	0.238237	2.55e-153
ENSCHIT00000011258	ENSCHIG00000000323	2.93e-161	8.81e-07	1.64e-102
TCONS_00004889	ENSCHIG00000000323	2.93e-161	7.61e-06	4.79e-99
ENSCHIT00000001087	ENSCHIG00000000323	2.93e-161	-0.426245	1.62e-152
ENSCHIT00000010466	ENSCHIG00000000325	1.3e-161	-0.641884	2.43e-147
ENSCHIT00000010480	ENSCHIG00000000325	1.3e-161	-1.58007	6.1e-148
ENSCHIT00000010475	ENSCHIG00000000325	1.3e-161	0.205225	2.13e-147
ENSCHIT00000010605	ENSCHIG00000000325	1.3e-161	-4.69156	4.22e-145
ENSCHIT00000010191	ENSCHIG00000000325	1.3e-161	0.81037	1.77e-147
ENSCHIT00000010581	ENSCHIG00000000325	1.3e-161	1.148	8.63e-149
ENSCHIT00000010406	ENSCHIG00000000325	1.3e-161	0.714376	3.73e-135
TCONS_00183438	ENSCHIG00000000325	1.3e-161	1.42692	3.81e-145
ENSCHIT00000010204	ENSCHIG00000000325	1.3e-161	6.07144	1.69e-150
TCONS_00078498	ENSCHIG00000000325	1.3e-161	1.62e-15	0.000370099
ENSCHIT00000010475	ENSCHIG00000000327	4.84e-177	-2.37136	4.59e-163
ENSCHIT00000010204	ENSCHIG00000000327	4.84e-177	-23.6566	3.11e-161
ENSCHIT00000010684	ENSCHIG00000000327	4.84e-177	7.49495	1.15e-152
ENSCHIT00000010691	ENSCHIG00000000327	4.84e-177	-2.57691	6.11e-151
ENSCHIT00000010466	ENSCHIG00000000327	4.84e-177	2.30231	1.06e-163
ENSCHIT00000010605	ENSCHIG00000000327	4.84e-177	99.12	2.65e-162
ENSCHIT00000010406	ENSCHIG00000000327	4.84e-177	63.1677	7.36e-172
ENSCHIT00000010480	ENSCHIG00000000327	4.84e-177	7.18487	1.86e-160
ENSCHIT00000010581	ENSCHIG00000000327	4.84e-177	-12.254	7.37e-165
ENSCHIT00000001140	ENSCHIG00000000329	1.45e-11	0.223335	0.000383605
TCONS_00038094	ENSCHIG00000000329	1.45e-11	0.0390843	0.00015598
TCONS_00000227	ENSCHIG00000000330	7.6e-19	6.5194	2.42e-17
ENSCHIT00000006956	ENSCHIG00000000331	2.22e-168	-3.57522	2.47e-159
ENSCHIT00000010743	ENSCHIG00000000331	2.22e-168	-162.683	2.17e-159
ENSCHIT00000005471	ENSCHIG00000000331	2.22e-168	-409.16	1.03e-159
ENSCHIT00000003342	ENSCHIG00000000331	2.22e-168	41.9493	6.13e-161
ENSCHIT00000001986	ENSCHIG00000000331	2.22e-168	366.967	6.58e-160
ENSCHIT00000003172	ENSCHIG00000000331	2.22e-168	-85.0101	3.25e-159
ENSCHIT00000003386	ENSCHIG00000000331	2.22e-168	54.9146	8.17e-159
ENSCHIT00000005364	ENSCHIG00000000331	2.22e-168	-16.2834	1.8e-158
ENSCHIT00000010914	ENSCHIG00000000331	2.22e-168	10.2795	7.31e-159
ENSCHIT00000005635	ENSCHIG00000000332	1.71e-158	0.243074	1.17e-145
TCONS_00210344	ENSCHIG00000000332	1.71e-158	2028.49	8.75e-130
ENSCHIT00000002576	ENSCHIG00000000332	1.71e-158	-6.53e-14	6.4e-23
TCONS_00246494	ENSCHIG00000000332	1.71e-158	-1391.52	4e-130
ENSCHIT00000002607	ENSCHIG00000000332	1.71e-158	-187.214	9.55e-130
ENSCHIT00000003143	ENSCHIG00000000333	2.19e-112	-140.612	3.13e-96
ENSCHIT00000007238	ENSCHIG00000000333	2.19e-112	137.556	6.83e-96
ENSCHIT00000011216	ENSCHIG00000000333	2.19e-112	157.867	7.06e-96
ENSCHIT00000005348	ENSCHIG00000000333	2.19e-112	-5.98491e+06	6.64e-96
ENSCHIT00000011008	ENSCHIG00000000333	2.19e-112	3.70112e+06	6.64e-96
ENSCHIT00000005141	ENSCHIG00000000333	2.19e-112	-4.83609	6.78e-96
ENSCHIT00000005928	ENSCHIG00000000333	2.19e-112	31.8406	1.2e-95
ENSCHIT00000001725	ENSCHIG00000000333	2.19e-112	24232.3	6.61e-96
ENSCHIT00000003888	ENSCHIG00000000333	2.19e-112	7.31129	1.31e-96
TCONS_00350475	ENSCHIG00000000333	2.19e-112	-1.64e-10	1.7e-07
ENSCHIT00000001209	ENSCHIG00000000334	1.13e-165	-36.6902	3.8e-140
ENSCHIT00000005448	ENSCHIG00000000334	1.13e-165	94.2581	1.79e-141
ENSCHIT00000007263	ENSCHIG00000000334	1.13e-165	-174.776	2.64e-142
ENSCHIT00000001707	ENSCHIG00000000334	1.13e-165	38.9197	2.73e-143
ENSCHIT00000001659	ENSCHIG00000000334	1.13e-165	-28.3201	7.02e-142
ENSCHIT00000003223	ENSCHIG00000000334	1.13e-165	-241.536	3.28e-141
ENSCHIT00000006850	ENSCHIG00000000334	1.13e-165	374.819	9.78e-141
ENSCHIT00000005490	ENSCHIG00000000334	1.13e-165	1163.45	2.6e-142
ENSCHIT00000001154	ENSCHIG00000000334	1.13e-165	102.735	2.49e-142
TCONS_00212217	ENSCHIG00000000335	1.83e-49	0.0886453	2.54e-47
TCONS_00074050	ENSCHIG00000000335	1.83e-49	-0.279849	2.79e-47
TCONS_00014071	ENSCHIG00000000335	1.83e-49	0.449726	3.9e-44
TCONS_00308714	ENSCHIG00000000335	1.83e-49	-1.58e-16	0.0248697
ENSCHIT00000010480	ENSCHIG00000000336	4.43e-98	3.59653	4.16e-83
ENSCHIT00000010406	ENSCHIG00000000336	4.43e-98	-59.562	1.97e-88
TCONS_00183438	ENSCHIG00000000336	4.43e-98	-10.2731	1.47e-87
TCONS_00078498	ENSCHIG00000000336	4.43e-98	-9.45e-15	0.00361532
ENSCHIT00000010475	ENSCHIG00000000336	4.43e-98	-1.08112	9.11e-85
TCONS_00105630	ENSCHIG00000000336	4.43e-98	3.03e-16	0.0477719
ENSCHIT00000010581	ENSCHIG00000000336	4.43e-98	-4.40919	4.02e-87
ENSCHIT00000010204	ENSCHIG00000000336	4.43e-98	18.272	6.58e-86
ENSCHIT00000010466	ENSCHIG00000000336	4.43e-98	2.15435	3.24e-85
ENSCHIT00000010605	ENSCHIG00000000336	4.43e-98	74.359	2.04e-86
ENSCHIT00000010191	ENSCHIG00000000336	4.43e-98	10.7572	1.95e-88
TCONS_00014930	ENSCHIG00000000336	4.43e-98	3.18e-16	0.0128855
TCONS_00105630	ENSCHIG00000000338	2.69e-123	-3.32e-17	0.035346
ENSCHIT00000001144	ENSCHIG00000000338	2.69e-123	5.29221	3.35e-113
ENSCHIT00000000875	ENSCHIG00000000338	2.69e-123	-0.209262	6.97e-116
ENSCHIT00000001769	ENSCHIG00000000338	2.69e-123	0.0816878	2.2e-111
ENSCHIT00000000846	ENSCHIG00000000338	2.69e-123	0.0871126	1.8e-112
ENSCHIT00000010505	ENSCHIG00000000338	2.69e-123	48.6371	7.83e-117
ENSCHIT00000001639	ENSCHIG00000000338	2.69e-123	0.399624	8.28e-116
ENSCHIT00000001330	ENSCHIG00000000338	2.69e-123	-0.124243	2.35e-117
ENSCHIT00000001691	ENSCHIG00000000338	2.69e-123	-10.2187	2.4e-115
ENSCHIT00000001428	ENSCHIG00000000338	2.69e-123	-0.233766	1.85e-116
ENSCHIT00000001428	ENSCHIG00000000340	1.08e-125	-11.095	1.13e-119
TCONS_00014930	ENSCHIG00000000340	1.08e-125	6.53e-16	0.0320393
ENSCHIT00000006060	ENSCHIG00000000340	1.08e-125	6.09223	3.28e-116
ENSCHIT00000001673	ENSCHIG00000000340	1.08e-125	-1.7644	2.86e-117
ENSCHIT00000005076	ENSCHIG00000000340	1.08e-125	3.35654	3.19e-115
ENSCHIT00000010847	ENSCHIG00000000340	1.08e-125	6.8265	6.81e-112
ENSCHIT00000002069	ENSCHIG00000000340	1.08e-125	-0.924749	6.14e-115
ENSCHIT00000001134	ENSCHIG00000000340	1.08e-125	-128.55	3.37e-118
ENSCHIT00000006321	ENSCHIG00000000340	1.08e-125	-6.02027	4.07e-118
ENSCHIT00000002663	ENSCHIG00000000340	1.08e-125	60.1157	2.09e-118
ENSCHIT00000010218	ENSCHIG00000000341	2.24e-10	1.06512	0.000244178
TCONS_00010311	ENSCHIG00000000345	7.28e-105	-0.16442	1.52e-67
ENSCHIT00000010280	ENSCHIG00000000345	7.28e-105	1.43e-17	1.69e-10
TCONS_00064373	ENSCHIG00000000345	7.28e-105	1.45e-17	2.78e-08
TCONS_00315095	ENSCHIG00000000345	7.28e-105	1.34e-16	4.72e-13
ENSCHIT00000001517	ENSCHIG00000000345	7.28e-105	-8.71e-14	1.33e-05
TCONS_00019002	ENSCHIG00000000345	7.28e-105	1.4904	2.11e-80
TCONS_00292343	ENSCHIG00000000345	7.28e-105	-1.34e-18	0.0387656
ENSCHIT00000001218	ENSCHIG00000000345	7.28e-105	-0.000312637	5.19e-12
ENSCHIT00000000827	ENSCHIG00000000345	7.28e-105	-9.04e-11	3.61e-08
TCONS_00304590	ENSCHIG00000000345	7.28e-105	-9.69e-19	0.0108061
ENSCHIT00000005052	ENSCHIG00000000346	1.64e-16	6.28925	0.0257532
TCONS_00360665	ENSCHIG00000000346	1.64e-16	1.92529	4.8e-06
ENSCHIT00000001639	ENSCHIG00000000347	1.74e-112	-485.031	1.8e-103
ENSCHIT00000000777	ENSCHIG00000000347	1.74e-112	2289.22	2.28e-103
ENSCHIT00000001144	ENSCHIG00000000347	1.74e-112	935.469	1.42e-103
ENSCHIT00000010480	ENSCHIG00000000347	1.74e-112	-2885.33	1.86e-103
TCONS_00105630	ENSCHIG00000000347	1.74e-112	6.99e-14	0.00264717
ENSCHIT00000000999	ENSCHIG00000000347	1.74e-112	857.679	1.38e-103
TCONS_00183438	ENSCHIG00000000347	1.74e-112	-1340.6	1.35e-103
ENSCHIT00000010983	ENSCHIG00000000347	1.74e-112	-2043.52	1.74e-103
ENSCHIT00000001031	ENSCHIG00000000347	1.74e-112	-24.3219	3.22e-101
ENSCHIT00000001691	ENSCHIG00000000347	1.74e-112	5055.23	1.65e-103
ENSCHIT00000006002	ENSCHIG00000000348	2.54e-11	9.31002	2.54e-11
ENSCHIT00000010581	ENSCHIG00000000349	4.85e-88	-573.659	3.01e-77
ENSCHIT00000010480	ENSCHIG00000000349	4.85e-88	513.128	3.1e-74
TCONS_00183438	ENSCHIG00000000349	4.85e-88	1109.23	1.47e-75
ENSCHIT00000010980	ENSCHIG00000000349	4.85e-88	1.0558e+07	5.77e-75
ENSCHIT00000010406	ENSCHIG00000000349	4.85e-88	5239.65	1.69e-75
ENSCHIT00000010475	ENSCHIG00000000349	4.85e-88	-248.616	1.32e-76
ENSCHIT00000010605	ENSCHIG00000000349	4.85e-88	14767.6	2.6e-76
ENSCHIT00000010691	ENSCHIG00000000349	4.85e-88	3683	9.12e-76
ENSCHIT00000010204	ENSCHIG00000000349	4.85e-88	-1.00026e+06	5.77e-75
ENSCHIT00000010639	ENSCHIG00000000350	6.94e-185	21.4704	3.43e-170
ENSCHIT00000001056	ENSCHIG00000000350	6.94e-185	27.3383	2.1e-175
ENSCHIT00000002189	ENSCHIG00000000350	6.94e-185	16.5634	5.58e-174
ENSCHIT00000002059	ENSCHIG00000000350	6.94e-185	1.15218	2.52e-166
ENSCHIT00000010684	ENSCHIG00000000350	6.94e-185	-90.8168	5e-173
ENSCHIT00000000998	ENSCHIG00000000350	6.94e-185	-0.597602	7.12e-163
ENSCHIT00000001914	ENSCHIG00000000350	6.94e-185	3.6208	3.4e-165
ENSCHIT00000001046	ENSCHIG00000000350	6.94e-185	0.617917	3.87e-168
ENSCHIT00000002015	ENSCHIG00000000350	6.94e-185	-13.0486	7.46e-174
ENSCHIT00000001603	ENSCHIG00000000351	6.67e-15	0.10869	2.05e-07
ENSCHIT00000005141	ENSCHIG00000000351	6.67e-15	0.0471293	2.16e-07
ENSCHIT00000003824	ENSCHIG00000000351	6.67e-15	-0.109817	1.91e-05
ENSCHIT00000001882	ENSCHIG00000000351	6.67e-15	0.153124	1.24e-05
ENSCHIT00000001504	ENSCHIG00000000351	6.67e-15	1.27804	0.000835447
ENSCHIT00000002126	ENSCHIG00000000351	6.67e-15	1.98719	3.31e-05
ENSCHIT00000000980	ENSCHIG00000000352	1.18e-73	-1.66747	4.19e-68
ENSCHIT00000000999	ENSCHIG00000000352	1.18e-73	-20.3346	1.76e-65
ENSCHIT00000000875	ENSCHIG00000000352	1.18e-73	4.15921	1.32e-64
ENSCHIT00000010980	ENSCHIG00000000352	1.18e-73	7698.24	1.22e-61
ENSCHIT00000000955	ENSCHIG00000000352	1.18e-73	-1.04362	2.32e-63
TCONS_00183792	ENSCHIG00000000352	1.18e-73	-7.41e-15	0.00599
TCONS_00146900	ENSCHIG00000000352	1.18e-73	8.44e-14	0.00313445
TCONS_00230083	ENSCHIG00000000352	1.18e-73	-1.76e-13	0.0345508
ENSCHIT00000000929	ENSCHIG00000000352	1.18e-73	-1.54493	6.08e-60
ENSCHIT00000000777	ENSCHIG00000000352	1.18e-73	22.5937	9.61e-66
ENSCHIT00000010480	ENSCHIG00000000352	1.18e-73	-24.0458	4.14e-64
ENSCHIT00000010204	ENSCHIG00000000352	1.18e-73	-676.637	1.96e-61
ENSCHIT00000005446	ENSCHIG00000000354	1.28e-09	0.587616	1.28e-09
ENSCHIT00000007019	ENSCHIG00000000355	1.66e-09	-19.7782	0.00333904
ENSCHIT00000002668	ENSCHIG00000000357	3.13e-08	0.525902	0.0391171
TCONS_00008527	ENSCHIG00000000358	3.5e-171	-1.29e-15	3.18e-15
ENSCHIT00000001099	ENSCHIG00000000358	3.5e-171	-0.647562	4.88e-121
ENSCHIT00000001791	ENSCHIG00000000358	3.5e-171	2.5691	2.62e-129
ENSCHIT00000011008	ENSCHIG00000000358	3.5e-171	0.0665704	3.62e-112
TCONS_00353198	ENSCHIG00000000358	3.5e-171	0.370513	1.88e-123
ENSCHIT00000011037	ENSCHIG00000000358	3.5e-171	-5135.7	1.88e-123
ENSCHIT00000004871	ENSCHIG00000000358	3.5e-171	0.00602377	3.18e-104
ENSCHIT00000003143	ENSCHIG00000000358	3.5e-171	5.34451	1.03e-157
ENSCHIT00000005071	ENSCHIG00000000358	3.5e-171	0.170699	1.75e-116
ENSCHIT00000002426	ENSCHIG00000000358	3.5e-171	-2.29624	2.21e-157
ENSCHIT00000001149	ENSCHIG00000000359	4.57e-09	1.53116	0.0440411
ENSCHIT00000000800	ENSCHIG00000000359	4.57e-09	3.29951	0.0200288
ENSCHIT00000010749	ENSCHIG00000000360	2.58e-125	25748.8	4.18e-107
TCONS_00285285	ENSCHIG00000000360	2.58e-125	3.64e-13	0.00193453
TCONS_00080424	ENSCHIG00000000360	2.58e-125	-6.51e-13	0.0317398
ENSCHIT00000010241	ENSCHIG00000000360	2.58e-125	-65395.5	4.26e-107
TCONS_00199762	ENSCHIG00000000360	2.58e-125	198.038	2.1e-122
TCONS_00272626	ENSCHIG00000000360	2.58e-125	-0.0915183	1.78e-104
TCONS_00249211	ENSCHIG00000000360	2.58e-125	-0.106539	4.71e-104
TCONS_00208239	ENSCHIG00000000360	2.58e-125	-8.46784	1.05e-119
ENSCHIT00000011138	ENSCHIG00000000360	2.58e-125	-4554.12	4.34e-107
ENSCHIT00000001013	ENSCHIG00000000360	2.58e-125	-10.4412	1.18e-120
TCONS_00073476	ENSCHIG00000000360	2.58e-125	18216.2	4.4e-107
ENSCHIT00000010475	ENSCHIG00000000361	2.1e-47	-2.74702	5.04e-43
ENSCHIT00000010480	ENSCHIG00000000361	2.1e-47	48.7626	1.17e-43
ENSCHIT00000010691	ENSCHIG00000000361	2.1e-47	50.3489	6.71e-44
ENSCHIT00000010743	ENSCHIG00000000361	2.1e-47	4.87773	6.86e-44
ENSCHIT00000010204	ENSCHIG00000000361	2.1e-47	-52.0218	4.34e-43
TCONS_00183438	ENSCHIG00000000361	2.1e-47	-28.1223	1.12e-44
ENSCHIT00000010406	ENSCHIG00000000361	2.1e-47	-221.65	2.87e-44
ENSCHIT00000010605	ENSCHIG00000000361	2.1e-47	105.543	1.85e-43
ENSCHIT00000010773	ENSCHIG00000000361	2.1e-47	16.4462	1.04e-43
ENSCHIT00000010825	ENSCHIG00000000362	1.22e-169	1.26201	4e-138
TCONS_00066650	ENSCHIG00000000362	1.22e-169	-11.0573	1.9e-155
ENSCHIT00000001045	ENSCHIG00000000362	1.22e-169	-11.2108	3.18e-155
ENSCHIT00000003264	ENSCHIG00000000362	1.22e-169	24.0237	9.62e-153
ENSCHIT00000001041	ENSCHIG00000000362	1.22e-169	-4.92238	2.05e-150
ENSCHIT00000010466	ENSCHIG00000000362	1.22e-169	-0.828074	3.97e-149
ENSCHIT00000002365	ENSCHIG00000000362	1.22e-169	35.5236	1.16e-153
ENSCHIT00000003064	ENSCHIG00000000362	1.22e-169	1.32777	1.57e-157
ENSCHIT00000010731	ENSCHIG00000000362	1.22e-169	-0.859498	5.97e-150
ENSCHIT00000006819	ENSCHIG00000000364	1.72e-21	3.51298	1.38e-10
TCONS_00374361	ENSCHIG00000000364	1.72e-21	-2.77379	8.59e-09
ENSCHIT00000006954	ENSCHIG00000000364	1.72e-21	0.224676	1e-06
ENSCHIT00000010992	ENSCHIG00000000364	1.72e-21	0.561748	3.06e-10
ENSCHIT00000007150	ENSCHIG00000000364	1.72e-21	1.95686	3.76e-11
ENSCHIT00000007437	ENSCHIG00000000364	1.72e-21	1.26773	8.62e-08
ENSCHIT00000010141	ENSCHIG00000000364	1.72e-21	-1.32883	7.61e-08
ENSCHIT00000011223	ENSCHIG00000000364	1.72e-21	-0.256505	0.0141293
ENSCHIT00000009833	ENSCHIG00000000365	1.66e-08	-29.7827	1.66e-08
ENSCHIT00000010141	ENSCHIG00000000367	4.07e-149	-5.56368	9.06e-140
ENSCHIT00000002637	ENSCHIG00000000367	4.07e-149	-5.3256	2.87e-140
ENSCHIT00000000817	ENSCHIG00000000367	4.07e-149	-10.1036	1.38e-139
ENSCHIT00000009503	ENSCHIG00000000367	4.07e-149	-37.4698	2.67e-140
ENSCHIT00000009745	ENSCHIG00000000367	4.07e-149	25.1775	3.55e-140
ENSCHIT00000004799	ENSCHIG00000000367	4.07e-149	-0.316729	5.48e-140
ENSCHIT00000005657	ENSCHIG00000000367	4.07e-149	0.102177	5.34e-136
ENSCHIT00000001860	ENSCHIG00000000367	4.07e-149	0.0842927	1.39e-129
TCONS_00328426	ENSCHIG00000000367	4.07e-149	9.43e-16	0.0151836
ENSCHIT00000005705	ENSCHIG00000000367	4.07e-149	3.87857	2.99e-140
ENSCHIT00000010605	ENSCHIG00000000368	1.11e-103	222.853	1.03e-96
ENSCHIT00000010406	ENSCHIG00000000368	1.11e-103	12.5087	4.36e-96
ENSCHIT00000010480	ENSCHIG00000000368	1.11e-103	18.8566	3.36e-96
ENSCHIT00000010684	ENSCHIG00000000368	1.11e-103	119.82	1.39e-96
ENSCHIT00000010204	ENSCHIG00000000368	1.11e-103	-56.7416	2.46e-96
TCONS_00183438	ENSCHIG00000000368	1.11e-103	-8.52286	1.54e-96
ENSCHIT00000010691	ENSCHIG00000000368	1.11e-103	46.0092	9.26e-97
ENSCHIT00000010581	ENSCHIG00000000368	1.11e-103	-19.6431	7.8e-97
TCONS_00014930	ENSCHIG00000000368	1.11e-103	6.16e-16	0.00673972
ENSCHIT00000010475	ENSCHIG00000000368	1.11e-103	-4.87396	1.17e-96
ENSCHIT00000010466	ENSCHIG00000000369	3.39e-157	3.37042	1.26e-151
ENSCHIT00000010204	ENSCHIG00000000369	3.39e-157	-8.88743	4.37e-148
ENSCHIT00000010406	ENSCHIG00000000369	3.39e-157	49.0437	1.51e-152
ENSCHIT00000010191	ENSCHIG00000000369	3.39e-157	-2.0027	6.77e-149
ENSCHIT00000010942	ENSCHIG00000000369	3.39e-157	-0.798296	1.47e-145
ENSCHIT00000010691	ENSCHIG00000000369	3.39e-157	-28.035	3.91e-150
ENSCHIT00000010692	ENSCHIG00000000369	3.39e-157	-13.522	2.52e-149
TCONS_00365179	ENSCHIG00000000369	3.39e-157	1.13e-15	0.0113273
ENSCHIT00000010581	ENSCHIG00000000369	3.39e-157	-0.719367	3.47e-146
ENSCHIT00000010480	ENSCHIG00000000369	3.39e-157	4.86542	2.09e-148
ENSCHIT00000005313	ENSCHIG00000000370	5.34e-175	0.245061	4.78e-166
ENSCHIT00000001031	ENSCHIG00000000370	5.34e-175	-0.0752561	6.68e-157
ENSCHIT00000005118	ENSCHIG00000000370	5.34e-175	2.26049	2.88e-163
ENSCHIT00000010505	ENSCHIG00000000370	5.34e-175	-12.9798	6.97e-165
ENSCHIT00000010300	ENSCHIG00000000370	5.34e-175	2.15864	3.55e-167
ENSCHIT00000006853	ENSCHIG00000000370	5.34e-175	-3.79452	1.25e-167
ENSCHIT00000002354	ENSCHIG00000000370	5.34e-175	0.225174	9.37e-167
ENSCHIT00000002367	ENSCHIG00000000370	5.34e-175	1.19407	2.79e-167
ENSCHIT00000001323	ENSCHIG00000000370	5.34e-175	-0.184041	1.38e-161
ENSCHIT00000002149	ENSCHIG00000000371	5.37e-162	0.5067	5.13e-149
ENSCHIT00000002379	ENSCHIG00000000371	5.37e-162	0.0129041	8.04e-148
ENSCHIT00000002648	ENSCHIG00000000371	5.37e-162	0.0188623	1.86e-145
ENSCHIT00000001255	ENSCHIG00000000371	5.37e-162	-0.0274781	6.52e-143
ENSCHIT00000010605	ENSCHIG00000000371	5.37e-162	-0.674641	1.84e-148
ENSCHIT00000003382	ENSCHIG00000000371	5.37e-162	0.892295	5e-154
TCONS_00147634	ENSCHIG00000000371	5.37e-162	6.61e-17	0.0432726
ENSCHIT00000001340	ENSCHIG00000000371	5.37e-162	0.181816	7.57e-151
ENSCHIT00000001317	ENSCHIG00000000371	5.37e-162	-0.0386241	1.35e-146
ENSCHIT00000000998	ENSCHIG00000000371	5.37e-162	-0.0272648	2.36e-145
ENSCHIT00000003888	ENSCHIG00000000373	3e-12	1.38711	9.19e-05
ENSCHIT00000002242	ENSCHIG00000000373	3e-12	-1.32925	0.00360642
ENSCHIT00000004768	ENSCHIG00000000374	1.28e-77	30.6993	1.93e-71
ENSCHIT00000001639	ENSCHIG00000000374	1.28e-77	-16.9803	3.19e-72
ENSCHIT00000001673	ENSCHIG00000000374	1.28e-77	-4.39109	8e-73
ENSCHIT00000001769	ENSCHIG00000000374	1.28e-77	-4.49491	7.52e-70
ENSCHIT00000001428	ENSCHIG00000000374	1.28e-77	21.807	3.69e-73
ENSCHIT00000000875	ENSCHIG00000000374	1.28e-77	18.5004	1.39e-73
ENSCHIT00000000980	ENSCHIG00000000374	1.28e-77	9.18004	6.06e-72
ENSCHIT00000001721	ENSCHIG00000000374	1.28e-77	-59.3645	1.44e-72
ENSCHIT00000005076	ENSCHIG00000000374	1.28e-77	-3.03212	1.05e-71
ENSCHIT00000011372	ENSCHIG00000000377	6.04e-12	5.60944	5.96e-05
ENSCHIT00000002561	ENSCHIG00000000377	6.04e-12	1.82024	0.0186031
ENSCHIT00000006946	ENSCHIG00000000379	6.09e-09	-1.21059	6.09e-09
ENSCHIT00000001434	ENSCHIG00000000380	1.98e-09	0.75256	1.98e-09
ENSCHIT00000011358	ENSCHIG00000000381	5.88e-67	-20.9887	3.81e-59
ENSCHIT00000000777	ENSCHIG00000000381	5.88e-67	-204.384	5.74e-60
TCONS_00062993	ENSCHIG00000000381	5.88e-67	1.8e-11	0.0173618
ENSCHIT00000010605	ENSCHIG00000000381	5.88e-67	-2312.56	1.39e-59
ENSCHIT00000011398	ENSCHIG00000000381	5.88e-67	-40.9865	8.55e-61
ENSCHIT00000010204	ENSCHIG00000000381	5.88e-67	155688	6.61e-61
ENSCHIT00000010847	ENSCHIG00000000381	5.88e-67	-157.397	4.49e-61
ENSCHIT00000010980	ENSCHIG00000000381	5.88e-67	-1.63635e+06	6.68e-61
ENSCHIT00000010480	ENSCHIG00000000381	5.88e-67	-300.921	2.06e-61
ENSCHIT00000010475	ENSCHIG00000000381	5.88e-67	70.1526	3.17e-60
TCONS_00309905	ENSCHIG00000000381	5.88e-67	-6.84e-12	0.025539
ENSCHIT00000010212	ENSCHIG00000000383	2.03e-58	23.4167	6.62e-55
TCONS_00295291	ENSCHIG00000000383	2.03e-58	-257.801	2.85e-55
TCONS_00077864	ENSCHIG00000000383	2.03e-58	89.7324	2.74e-55
ENSCHIT00000002222	ENSCHIG00000000383	2.03e-58	1.11361e+06	2.47e-55
TCONS_00039580	ENSCHIG00000000383	2.03e-58	3.66773e+06	2.99e-55
TCONS_00082624	ENSCHIG00000000383	2.03e-58	38.9774	1.33e-56
ENSCHIT00000002381	ENSCHIG00000000383	2.03e-58	-139174	2.58e-55
ENSCHIT00000000879	ENSCHIG00000000383	2.03e-58	-910662	1.07e-56
TCONS_00226886	ENSCHIG00000000383	2.03e-58	145.035	2.35e-55
ENSCHIT00000000865	ENSCHIG00000000385	1.29e-175	0.763429	1.83e-169
ENSCHIT00000001146	ENSCHIG00000000385	1.29e-175	-0.900592	4.75e-163
ENSCHIT00000002563	ENSCHIG00000000385	1.29e-175	-4.58609	2.55e-169
ENSCHIT00000010427	ENSCHIG00000000385	1.29e-175	0.022474	3.88e-159
ENSCHIT00000001894	ENSCHIG00000000385	1.29e-175	-0.259082	8.39e-169
ENSCHIT00000003677	ENSCHIG00000000385	1.29e-175	2.96687	7.5e-170
ENSCHIT00000003184	ENSCHIG00000000385	1.29e-175	-5.24214	2.55e-164
ENSCHIT00000010976	ENSCHIG00000000385	1.29e-175	-0.652301	3.63e-165
ENSCHIT00000002843	ENSCHIG00000000385	1.29e-175	-2.33197	1.03e-165
ENSCHIT00000006965	ENSCHIG00000000386	3.27e-10	-2.73091	0.00125416
ENSCHIT00000001194	ENSCHIG00000000386	3.27e-10	-13.076	0.000858061
ENSCHIT00000001841	ENSCHIG00000000389	1.36e-156	24.2277	9.68e-144
ENSCHIT00000001603	ENSCHIG00000000389	1.36e-156	-26.9819	2.16e-143
ENSCHIT00000003224	ENSCHIG00000000389	1.36e-156	166.374	4.96e-142
ENSCHIT00000003324	ENSCHIG00000000389	1.36e-156	-2.2848	1.78e-140
ENSCHIT00000009990	ENSCHIG00000000389	1.36e-156	-15.3064	3.33e-136
ENSCHIT00000002189	ENSCHIG00000000389	1.36e-156	-12.8808	1.48e-138
ENSCHIT00000002059	ENSCHIG00000000389	1.36e-156	-10.1712	3.06e-144
ENSCHIT00000006954	ENSCHIG00000000389	1.36e-156	3.31671	1.28e-142
ENSCHIT00000007158	ENSCHIG00000000389	1.36e-156	26.5164	1.08e-142
ENSCHIT00000003064	ENSCHIG00000000390	9.03e-18	-0.480949	0.00228548
ENSCHIT00000010914	ENSCHIG00000000390	9.03e-18	4.54152	2.92e-09
ENSCHIT00000001443	ENSCHIG00000000390	9.03e-18	2.83571	0.0031728
ENSCHIT00000007276	ENSCHIG00000000390	9.03e-18	3.88392	6.38e-05
TCONS_00017128	ENSCHIG00000000390	9.03e-18	7.57544	1.42e-10
ENSCHIT00000009833	ENSCHIG00000000391	1.07e-09	-2.16181	1.07e-09
ENSCHIT00000000782	ENSCHIG00000000392	1.61e-140	-0.354267	8.86e-122
ENSCHIT00000005209	ENSCHIG00000000392	1.61e-140	3.41345	2.05e-125
ENSCHIT00000002670	ENSCHIG00000000392	1.61e-140	9.70394	9.65e-128
ENSCHIT00000000955	ENSCHIG00000000392	1.61e-140	-2.049	6.95e-124
ENSCHIT00000001652	ENSCHIG00000000392	1.61e-140	9709.49	1.45e-127
ENSCHIT00000001968	ENSCHIG00000000392	1.61e-140	90.0654	3.31e-128
ENSCHIT00000001639	ENSCHIG00000000392	1.61e-140	-0.0486165	1.28e-114
ENSCHIT00000001740	ENSCHIG00000000392	1.61e-140	-9.59844	2.97e-129
ENSCHIT00000001031	ENSCHIG00000000392	1.61e-140	8.43096	5.7e-133
ENSCHIT00000007522	ENSCHIG00000000393	4.41e-144	7466.13	1.81e-137
TCONS_00074049	ENSCHIG00000000393	4.41e-144	-23501.8	2.25e-137
TCONS_00132341	ENSCHIG00000000393	4.41e-144	35145.8	1.26e-130
ENSCHIT00000008116	ENSCHIG00000000393	4.41e-144	-22012.7	1.14e-134
ENSCHIT00000009882	ENSCHIG00000000393	4.41e-144	1621.2	3.15e-124
ENSCHIT00000009229	ENSCHIG00000000393	4.41e-144	1119.43	4.28e-127
ENSCHIT00000009816	ENSCHIG00000000393	4.41e-144	-29.7772	2.21e-122
TCONS_00186729	ENSCHIG00000000393	4.41e-144	0.450165	1.38e-133
ENSCHIT00000008068	ENSCHIG00000000393	4.41e-144	4.04028	1.74e-122
ENSCHIT00000000875	ENSCHIG00000000394	3.13e-141	-2.66241	1.08e-133
ENSCHIT00000000980	ENSCHIG00000000394	3.13e-141	-2.05387	7.47e-135
TCONS_00146900	ENSCHIG00000000394	3.13e-141	1.77e-15	0.0291862
ENSCHIT00000007518	ENSCHIG00000000394	3.13e-141	-15.617	5.49e-134
ENSCHIT00000005592	ENSCHIG00000000394	3.13e-141	-0.248729	8.44e-128
ENSCHIT00000008520	ENSCHIG00000000394	3.13e-141	-30.973	8.65e-134
ENSCHIT00000006321	ENSCHIG00000000394	3.13e-141	1.69416	2.54e-133
ENSCHIT00000001585	ENSCHIG00000000394	3.13e-141	-2.784	4.49e-128
ENSCHIT00000004768	ENSCHIG00000000394	3.13e-141	18.2568	2.83e-136
ENSCHIT00000001428	ENSCHIG00000000394	3.13e-141	-2.05857	3.65e-134
ENSCHIT00000010466	ENSCHIG00000000395	6.44e-119	25.387	1.18e-113
ENSCHIT00000011229	ENSCHIG00000000395	6.44e-119	6.03528	9.99e-114
ENSCHIT00000010980	ENSCHIG00000000395	6.44e-119	647898	1.85e-113
ENSCHIT00000010743	ENSCHIG00000000395	6.44e-119	11.9903	2e-113
ENSCHIT00000010204	ENSCHIG00000000395	6.44e-119	-61244.9	1.85e-113
ENSCHIT00000010684	ENSCHIG00000000395	6.44e-119	-67.6437	4.33e-113
ENSCHIT00000010691	ENSCHIG00000000395	6.44e-119	14.7322	6.49e-113
ENSCHIT00000010480	ENSCHIG00000000395	6.44e-119	29.1448	9.41e-113
ENSCHIT00000011312	ENSCHIG00000000395	6.44e-119	-320.664	2.24e-113
ENSCHIT00000000777	ENSCHIG00000000397	1.59e-39	-42.2522	1.53e-33
ENSCHIT00000010480	ENSCHIG00000000397	1.59e-39	17.2986	1.08e-31
ENSCHIT00000010605	ENSCHIG00000000397	1.59e-39	76.9882	1.3e-33
ENSCHIT00000010980	ENSCHIG00000000397	1.59e-39	-264890	4.88e-33
TCONS_00183438	ENSCHIG00000000397	1.59e-39	38.2332	9.88e-33
ENSCHIT00000011398	ENSCHIG00000000397	1.59e-39	15.9497	5.57e-33
ENSCHIT00000010983	ENSCHIG00000000397	1.59e-39	85.105	1.04e-32
ENSCHIT00000000875	ENSCHIG00000000397	1.59e-39	8.18419	6.85e-34
ENSCHIT00000010204	ENSCHIG00000000397	1.59e-39	24919.7	4.91e-33
ENSCHIT00000001144	ENSCHIG00000000398	3.51e-48	-0.834461	9.35e-39
ENSCHIT00000001585	ENSCHIG00000000398	3.51e-48	20.738	4.58e-41
TCONS_00183438	ENSCHIG00000000398	3.51e-48	-16.4632	9.1e-40
ENSCHIT00000000929	ENSCHIG00000000398	3.51e-48	-3.49578	6.23e-39
ENSCHIT00000001639	ENSCHIG00000000398	3.51e-48	-2.34542	1.87e-42
ENSCHIT00000000875	ENSCHIG00000000398	3.51e-48	3.81955	9.85e-42
ENSCHIT00000001428	ENSCHIG00000000398	3.51e-48	0.789824	3.41e-38
ENSCHIT00000000980	ENSCHIG00000000398	3.51e-48	-0.78261	9.01e-40
ENSCHIT00000001134	ENSCHIG00000000398	3.51e-48	-8.02945	4.89e-41
ENSCHIT00000009488	ENSCHIG00000000400	4.03e-08	6.52668	0.0398935
TCONS_00094972	ENSCHIG00000000401	2.2e-18	3.13e-16	0.0033579
TCONS_00145007	ENSCHIG00000000401	2.2e-18	-5.06e-17	0.00250292
TCONS_00087027	ENSCHIG00000000401	2.2e-18	9.67e-17	0.00738773
TCONS_00000958	ENSCHIG00000000401	2.2e-18	0.376644	1.85e-14
TCONS_00353198	ENSCHIG00000000401	2.2e-18	-2.18e-17	0.00255551
TCONS_00008527	ENSCHIG00000000401	2.2e-18	8.56e-17	0.00209063
ENSCHIT00000003318	ENSCHIG00000000403	5.4e-120	1.87964	4.17e-116
ENSCHIT00000001517	ENSCHIG00000000403	5.4e-120	51647.9	1.22e-115
ENSCHIT00000000838	ENSCHIG00000000403	5.4e-120	12.937	5.84e-108
TCONS_00112439	ENSCHIG00000000403	5.4e-120	-63153.7	1.22e-115
ENSCHIT00000003424	ENSCHIG00000000403	5.4e-120	16.682	2.06e-115
TCONS_00304590	ENSCHIG00000000403	5.4e-120	1.44e-12	0.0278184
ENSCHIT00000001809	ENSCHIG00000000403	5.4e-120	-5.15861	2.45e-115
TCONS_00180663	ENSCHIG00000000403	5.4e-120	173607	1.22e-115
ENSCHIT00000009793	ENSCHIG00000000403	5.4e-120	2.81411	3.96e-110
ENSCHIT00000006175	ENSCHIG00000000403	5.4e-120	0.0986664	1.41e-108
ENSCHIT00000010942	ENSCHIG00000000404	1.47e-126	19.3933	2.31e-116
ENSCHIT00000000777	ENSCHIG00000000404	1.47e-126	-50.1231	1.23e-116
TCONS_00183438	ENSCHIG00000000404	1.47e-126	27.3022	7.75e-115
ENSCHIT00000011398	ENSCHIG00000000404	1.47e-126	-21.1874	6.96e-117
ENSCHIT00000011347	ENSCHIG00000000404	1.47e-126	-314.788	2.08e-116
ENSCHIT00000000872	ENSCHIG00000000404	1.47e-126	46.8462	1.83e-116
ENSCHIT00000010427	ENSCHIG00000000404	1.47e-126	-16.099	1.26e-116
ENSCHIT00000000929	ENSCHIG00000000404	1.47e-126	-68.9417	2.51e-116
ENSCHIT00000010618	ENSCHIG00000000404	1.47e-126	146.561	1.27e-116
ENSCHIT00000001041	ENSCHIG00000000405	6.95e-189	-1.37997	1.61e-170
ENSCHIT00000001841	ENSCHIG00000000405	6.95e-189	3.1607	3.95e-173
ENSCHIT00000002189	ENSCHIG00000000405	6.95e-189	-4.67826	3.8e-172
ENSCHIT00000003064	ENSCHIG00000000405	6.95e-189	1.93717	3.23e-175
ENSCHIT00000005141	ENSCHIG00000000405	6.95e-189	1.51105	4.69e-180
ENSCHIT00000003264	ENSCHIG00000000405	6.95e-189	-17.7907	1.92e-180
ENSCHIT00000010914	ENSCHIG00000000405	6.95e-189	7.52485	1.94e-176
ENSCHIT00000001790	ENSCHIG00000000405	6.95e-189	-3.06231	9.58e-177
ENSCHIT00000001986	ENSCHIG00000000405	6.95e-189	-0.670711	6.74e-165
ENSCHIT00000002021	ENSCHIG00000000407	1.47e-11	-100.434	0.00467397
ENSCHIT00000009901	ENSCHIG00000000407	1.47e-11	-94.8198	1.49e-05
ENSCHIT00000001059	ENSCHIG00000000408	3.05e-151	35.4239	2.89e-138
ENSCHIT00000010605	ENSCHIG00000000408	3.05e-151	-52.6124	3.32e-138
ENSCHIT00000011358	ENSCHIG00000000408	3.05e-151	4.00953	4.99e-138
ENSCHIT00000009455	ENSCHIG00000000408	3.05e-151	-0.642443	5.62e-132
ENSCHIT00000001002	ENSCHIG00000000408	3.05e-151	1.22897	9.99e-142
ENSCHIT00000001340	ENSCHIG00000000408	3.05e-151	7.76845	7.33e-138
ENSCHIT00000001968	ENSCHIG00000000408	3.05e-151	2.6801	1.68e-134
ENSCHIT00000010581	ENSCHIG00000000408	3.05e-151	-2.9672	3.59e-138
TCONS_00292342	ENSCHIG00000000408	3.05e-151	3.25e-15	0.00696583
ENSCHIT00000003451	ENSCHIG00000000408	3.05e-151	0.704142	1.09e-138
ENSCHIT00000003660	ENSCHIG00000000409	5.67e-12	-3.54125	0.0122945
ENSCHIT00000009536	ENSCHIG00000000409	5.67e-12	389789	6.91e-05
ENSCHIT00000010847	ENSCHIG00000000409	5.67e-12	-1.21376	0.0271824
ENSCHIT00000010022	ENSCHIG00000000410	5.88e-12	14.2536	0.00119669
ENSCHIT00000008138	ENSCHIG00000000410	5.88e-12	19.0935	0.000242572
ENSCHIT00000009545	ENSCHIG00000000410	5.88e-12	6.22604	0.0196557
TCONS_00002961	ENSCHIG00000000410	5.88e-12	-0.266048	0.0104033
ENSCHIT00000009391	ENSCHIG00000000410	5.88e-12	1.37897	0.000111417
ENSCHIT00000010505	ENSCHIG00000000410	5.88e-12	-184.336	0.00191844
ENSCHIT00000003293	ENSCHIG00000000410	5.88e-12	-11.3168	0.0346741
ENSCHIT00000009109	ENSCHIG00000000410	5.88e-12	-0.673341	0.01104
ENSCHIT00000010691	ENSCHIG00000000411	3.05e-126	9.3597	1.11e-116
ENSCHIT00000010605	ENSCHIG00000000411	3.05e-126	12.4905	1.08e-115
ENSCHIT00000010191	ENSCHIG00000000411	3.05e-126	8.01901	2.45e-119
ENSCHIT00000010942	ENSCHIG00000000411	3.05e-126	1.64703	7.75e-117
ENSCHIT00000010204	ENSCHIG00000000411	3.05e-126	7.41883	3.29e-115
ENSCHIT00000010480	ENSCHIG00000000411	3.05e-126	-5.87993	4.35e-117
ENSCHIT00000010581	ENSCHIG00000000411	3.05e-126	0.58899	2.47e-112
TCONS_00183438	ENSCHIG00000000411	3.05e-126	-11.3354	4.37e-119
ENSCHIT00000010406	ENSCHIG00000000411	3.05e-126	-56.7926	3.67e-118
ENSCHIT00000010983	ENSCHIG00000000414	3.28e-82	12.941	1.66e-71
TCONS_00183438	ENSCHIG00000000414	3.28e-82	3.52448	2.4e-72
ENSCHIT00000010480	ENSCHIG00000000414	3.28e-82	-19.0032	1.97e-71
ENSCHIT00000010475	ENSCHIG00000000414	3.28e-82	-2.67521	3.78e-76
ENSCHIT00000010605	ENSCHIG00000000414	3.28e-82	166.254	4.06e-77
ENSCHIT00000010581	ENSCHIG00000000414	3.28e-82	-2.15636	1.78e-70
ENSCHIT00000010980	ENSCHIG00000000414	3.28e-82	-29786.1	3.88e-69
ENSCHIT00000010204	ENSCHIG00000000414	3.28e-82	2831.44	3.83e-69
ENSCHIT00000010406	ENSCHIG00000000414	3.28e-82	-28.0384	6.9e-69
ENSCHIT00000010581	ENSCHIG00000000419	1.76e-114	1621.49	1.22e-101
ENSCHIT00000010684	ENSCHIG00000000419	1.76e-114	-9521.68	1.29e-101
ENSCHIT00000010605	ENSCHIG00000000419	1.76e-114	-14309.6	1.38e-101
ENSCHIT00000010466	ENSCHIG00000000419	1.76e-114	-586.259	1.22e-101
TCONS_00183438	ENSCHIG00000000419	1.76e-114	1986.29	1.24e-101
ENSCHIT00000010475	ENSCHIG00000000419	1.76e-114	386.088	1.31e-101
ENSCHIT00000010406	ENSCHIG00000000419	1.76e-114	-1343.76	1.15e-101
ENSCHIT00000010480	ENSCHIG00000000419	1.76e-114	-1693.54	1.27e-101
ENSCHIT00000010204	ENSCHIG00000000419	1.76e-114	4811.44	1.2e-101
ENSCHIT00000010480	ENSCHIG00000000420	2.43e-62	-18.9214	6.3e-57
ENSCHIT00000010581	ENSCHIG00000000420	2.43e-62	-61.6328	3.96e-58
ENSCHIT00000010475	ENSCHIG00000000420	2.43e-62	-19.2788	2.48e-58
ENSCHIT00000010406	ENSCHIG00000000420	2.43e-62	246.21	2.65e-57
TCONS_00078498	ENSCHIG00000000420	2.43e-62	1.27e-13	0.0481357
ENSCHIT00000010204	ENSCHIG00000000420	2.43e-62	-25.9805	3.23e-56
TCONS_00183438	ENSCHIG00000000420	2.43e-62	40.5674	9.76e-60
ENSCHIT00000010743	ENSCHIG00000000420	2.43e-62	19.8695	5.75e-57
ENSCHIT00000010605	ENSCHIG00000000420	2.43e-62	865.152	1.93e-58
ENSCHIT00000010691	ENSCHIG00000000420	2.43e-62	127.163	8.78e-59
ENSCHIT00000002925	ENSCHIG00000000421	7.01e-12	-2.20618	0.031692
ENSCHIT00000001882	ENSCHIG00000000421	7.01e-12	3.19	0.0428015
ENSCHIT00000004816	ENSCHIG00000000422	3.04e-09	-8.55513	0.00988931
ENSCHIT00000009490	ENSCHIG00000000422	3.04e-09	-19.3159	0.00337418
ENSCHIT00000002843	ENSCHIG00000000425	4.44e-09	13.8562	0.0140386
ENSCHIT00000000865	ENSCHIG00000000425	4.44e-09	-1.51073	0.049571
ENSCHIT00000003184	ENSCHIG00000000425	4.44e-09	28.3941	0.0131172
TCONS_00026724	ENSCHIG00000000426	2.28e-09	68.5207	0.031787
ENSCHIT00000010204	ENSCHIG00000000427	1.09e-60	-184.918	2.19e-52
ENSCHIT00000010684	ENSCHIG00000000427	1.09e-60	400.26	1.1e-52
ENSCHIT00000010406	ENSCHIG00000000427	1.09e-60	3.78534	1.49e-47
ENSCHIT00000010480	ENSCHIG00000000427	1.09e-60	64.8311	2.53e-52
ENSCHIT00000010691	ENSCHIG00000000427	1.09e-60	145.017	5.55e-53
ENSCHIT00000010605	ENSCHIG00000000427	1.09e-60	859.862	3.42e-53
ENSCHIT00000010581	ENSCHIG00000000427	1.09e-60	-64.5964	6.14e-53
TCONS_00183438	ENSCHIG00000000427	1.09e-60	-39.8144	2.15e-53
ENSCHIT00000010475	ENSCHIG00000000427	1.09e-60	-18.3106	3.96e-53
ENSCHIT00000005742	ENSCHIG00000000429	5.79e-10	-0.131698	0.00282501
ENSCHIT00000010580	ENSCHIG00000000429	5.79e-10	-2.65396	0.00667296
ENSCHIT00000005559	ENSCHIG00000000431	1.4e-09	-13.1795	1.4e-09
ENSCHIT00000005003	ENSCHIG00000000433	1.82e-11	-0.282645	0.00612137
ENSCHIT00000010480	ENSCHIG00000000434	5.04e-127	-4.19365	8e-113
ENSCHIT00000010605	ENSCHIG00000000434	5.04e-127	26.4026	3.51e-112
ENSCHIT00000010191	ENSCHIG00000000434	5.04e-127	1.3977	1.39e-111
TCONS_00183438	ENSCHIG00000000434	5.04e-127	1.43478	3.71e-111
ENSCHIT00000010475	ENSCHIG00000000434	5.04e-127	-1.15307	6.94e-114
ENSCHIT00000010406	ENSCHIG00000000434	5.04e-127	-4.71517	8.59e-110
ENSCHIT00000010204	ENSCHIG00000000434	5.04e-127	17.6646	8.76e-116
ENSCHIT00000010466	ENSCHIG00000000434	5.04e-127	0.284879	5.09e-108
ENSCHIT00000010581	ENSCHIG00000000434	5.04e-127	-1.55234	4.98e-113
ENSCHIT00000000929	ENSCHIG00000000435	1.91e-145	14.4108	7.93e-138
TCONS_00292342	ENSCHIG00000000435	1.91e-145	9.25e-14	0.023319
ENSCHIT00000000955	ENSCHIG00000000435	1.91e-145	-1.6424	4.35e-132
ENSCHIT00000011357	ENSCHIG00000000435	1.91e-145	7.32583	5.44e-137
ENSCHIT00000010980	ENSCHIG00000000435	1.91e-145	-10365.8	2.46e-126
ENSCHIT00000010480	ENSCHIG00000000435	1.91e-145	-7.24287	2.07e-131
ENSCHIT00000010204	ENSCHIG00000000435	1.91e-145	960.104	2.94e-126
ENSCHIT00000011398	ENSCHIG00000000435	1.91e-145	-5.24536	1.19e-134
ENSCHIT00000010605	ENSCHIG00000000435	1.91e-145	189.333	7.83e-140
ENSCHIT00000011358	ENSCHIG00000000435	1.91e-145	-2.70214	5.75e-135
ENSCHIT00000007908	ENSCHIG00000000437	2.63e-11	19.6753	4.73e-05
ENSCHIT00000008077	ENSCHIG00000000437	2.63e-11	11.5812	0.0304062
ENSCHIT00000009756	ENSCHIG00000000439	1.62e-10	-5.9627	1.62e-10
ENSCHIT00000009785	ENSCHIG00000000440	7.88e-10	147622	0.0272499
TCONS_00377886	ENSCHIG00000000440	7.88e-10	-8406.71	0.0272462
ENSCHIT00000011182	ENSCHIG00000000440	7.88e-10	110321	0.0272419
TCONS_00122474	ENSCHIG00000000441	1.51e-08	2.65771	0.0490184
TCONS_00204443	ENSCHIG00000000441	1.51e-08	2.778	0.0481396
TCONS_00040049	ENSCHIG00000000442	6.39e-176	1.71738	1.51e-150
TCONS_00180652	ENSCHIG00000000442	6.39e-176	2.62e-14	0.00205829
TCONS_00134990	ENSCHIG00000000442	6.39e-176	-3.23254	2.47e-131
ENSCHIT00000004797	ENSCHIG00000000442	6.39e-176	-4.3e-15	0.0130754
ENSCHIT00000001398	ENSCHIG00000000442	6.39e-176	-1.17e-15	0.013715
TCONS_00165614	ENSCHIG00000000442	6.39e-176	4.4652	5.13e-122
TCONS_00327795	ENSCHIG00000000442	6.39e-176	1.88e-14	0.0130058
ENSCHIT00000010475	ENSCHIG00000000445	6.52e-170	5.26269	7.24e-159
ENSCHIT00000004773	ENSCHIG00000000445	6.52e-170	81.3919	3.85e-158
ENSCHIT00000002637	ENSCHIG00000000445	6.52e-170	6.59763	4.13e-160
ENSCHIT00000002648	ENSCHIG00000000445	6.52e-170	8.57421	2.53e-158
ENSCHIT00000002659	ENSCHIG00000000445	6.52e-170	-5.31014	1.33e-156
ENSCHIT00000001245	ENSCHIG00000000445	6.52e-170	6.27218e+06	4.46e-157
ENSCHIT00000001255	ENSCHIG00000000445	6.52e-170	-44.185	1.52e-158
ENSCHIT00000004799	ENSCHIG00000000445	6.52e-170	0.0641265	2.26e-152
ENSCHIT00000001046	ENSCHIG00000000445	6.52e-170	-4.82893	7.15e-158
ENSCHIT00000001207	ENSCHIG00000000446	3.56e-12	97692.7	9.46e-06
ENSCHIT00000001965	ENSCHIG00000000446	3.56e-12	7.47782	3.99e-05
ENSCHIT00000010475	ENSCHIG00000000447	1.82e-142	-0.376248	1.84e-128
ENSCHIT00000010605	ENSCHIG00000000447	1.82e-142	5.73904	2.06e-125
ENSCHIT00000010427	ENSCHIG00000000447	1.82e-142	0.200693	4.16e-131
TCONS_00078498	ENSCHIG00000000447	1.82e-142	2.23e-15	0.0047979
ENSCHIT00000010581	ENSCHIG00000000447	1.82e-142	0.168461	1.21e-122
TCONS_00183438	ENSCHIG00000000447	1.82e-142	0.636973	6.38e-125
ENSCHIT00000010204	ENSCHIG00000000447	1.82e-142	2.28149	2.27e-126
ENSCHIT00000010406	ENSCHIG00000000447	1.82e-142	-8.83469	2.49e-127
ENSCHIT00000010480	ENSCHIG00000000447	1.82e-142	1.2067	5.5e-127
ENSCHIT00000010466	ENSCHIG00000000447	1.82e-142	0.339228	1.45e-125
ENSCHIT00000002059	ENSCHIG00000000448	2.55e-12	11.0117	0.0154042
ENSCHIT00000002785	ENSCHIG00000000448	2.55e-12	-1.81583	0.00546026
ENSCHIT00000002852	ENSCHIG00000000448	2.55e-12	-3.64126	0.0334493
ENSCHIT00000005705	ENSCHIG00000000448	2.55e-12	-3.85491	0.048046
ENSCHIT00000003736	ENSCHIG00000000448	2.55e-12	-4.63364	0.00496636
ENSCHIT00000010406	ENSCHIG00000000449	3.06e-122	120.068	7.17e-116
ENSCHIT00000010980	ENSCHIG00000000449	3.06e-122	262252	5.45e-116
ENSCHIT00000010480	ENSCHIG00000000449	3.06e-122	-0.614749	1.05e-108
ENSCHIT00000010204	ENSCHIG00000000449	3.06e-122	-24782.4	5.45e-116
ENSCHIT00000010466	ENSCHIG00000000449	3.06e-122	11.8873	5.25e-116
TCONS_00365179	ENSCHIG00000000449	3.06e-122	6.56e-12	8.35e-10
ENSCHIT00000010581	ENSCHIG00000000449	3.06e-122	3.14655	4.83e-117
ENSCHIT00000010691	ENSCHIG00000000449	3.06e-122	-33.3513	6.27e-116
ENSCHIT00000010983	ENSCHIG00000000449	3.06e-122	-7.73156	9.31e-116
ENSCHIT00000010684	ENSCHIG00000000449	3.06e-122	-108.955	5.17e-116
ENSCHIT00000002249	ENSCHIG00000000451	2.33e-14	0.519508	1.04e-07
TCONS_00078498	ENSCHIG00000000454	8.55e-130	-1.95e-14	0.0449997
ENSCHIT00000010475	ENSCHIG00000000454	8.55e-130	-13.6047	3.3e-116
ENSCHIT00000010581	ENSCHIG00000000454	8.55e-130	-56.3125	3.45e-116
ENSCHIT00000010684	ENSCHIG00000000454	8.55e-130	334.909	3.24e-116
ENSCHIT00000010406	ENSCHIG00000000454	8.55e-130	31.7769	1.11e-114
ENSCHIT00000010204	ENSCHIG00000000454	8.55e-130	-160.757	4.77e-116
ENSCHIT00000010466	ENSCHIG00000000454	8.55e-130	21.1504	2.41e-116
ENSCHIT00000010480	ENSCHIG00000000454	8.55e-130	56.4077	5.27e-116
ENSCHIT00000010605	ENSCHIG00000000454	8.55e-130	510.639	3.13e-116
TCONS_00183438	ENSCHIG00000000454	8.55e-130	-72.2048	2.28e-116
ENSCHIT00000010743	ENSCHIG00000000455	3.04e-96	0.124107	3.45e-83
TCONS_00014930	ENSCHIG00000000455	3.04e-96	7.36e-17	0.0112787
ENSCHIT00000010691	ENSCHIG00000000455	3.04e-96	11.1267	1.46e-90
TCONS_00319548	ENSCHIG00000000455	3.04e-96	-9.69e-17	0.00162301
ENSCHIT00000010581	ENSCHIG00000000455	3.04e-96	-2.74095	1.29e-89
ENSCHIT00000010480	ENSCHIG00000000455	3.04e-96	4.30287	8.97e-91
TCONS_00078498	ENSCHIG00000000455	3.04e-96	3.32e-15	0.00104235
ENSCHIT00000010605	ENSCHIG00000000455	3.04e-96	32.6901	3.06e-89
TCONS_00183438	ENSCHIG00000000455	3.04e-96	-1.46229	4.55e-88
ENSCHIT00000010406	ENSCHIG00000000455	3.04e-96	2.31336	2.56e-84
ENSCHIT00000010475	ENSCHIG00000000455	3.04e-96	-0.218199	3.13e-86
ENSCHIT00000010204	ENSCHIG00000000455	3.04e-96	-9.20891	2.88e-91
ENSCHIT00000000940	ENSCHIG00000000457	1.41e-08	4.88167	1.41e-08
TCONS_00325231	ENSCHIG00000000458	4.31e-119	-1.9e-16	0.00243396
TCONS_00008527	ENSCHIG00000000458	4.31e-119	1.34e-17	0.0207619
TCONS_00094972	ENSCHIG00000000458	4.31e-119	1.18e-16	0.0101363
TCONS_00000958	ENSCHIG00000000458	4.31e-119	0.955026	1.8e-81
ENSCHIT00000010261	ENSCHIG00000000458	4.31e-119	-7.1e-12	0.000189181
TCONS_00105726	ENSCHIG00000000458	4.31e-119	-3.45e-17	0.0451797
TCONS_00178538	ENSCHIG00000000458	4.31e-119	1.30772	7.74e-109
TCONS_00340442	ENSCHIG00000000458	4.31e-119	-1.19e-17	0.00471814
TCONS_00355540	ENSCHIG00000000458	4.31e-119	8.89e-18	0.0481002
ENSCHIT00000001917	ENSCHIG00000000458	4.31e-119	-3.83e-17	0.000151603
ENSCHIT00000010638	ENSCHIG00000000458	4.31e-119	2.86e-12	3.51e-05
ENSCHIT00000007800	ENSCHIG00000000459	7.17e-154	2.62e-15	3.23e-07
TCONS_00199084	ENSCHIG00000000459	7.17e-154	0.27212	5.93e-121
TCONS_00108978	ENSCHIG00000000459	7.17e-154	7.01e-15	3.13e-07
TCONS_00000248	ENSCHIG00000000459	7.17e-154	-0.804033	2.06e-102
ENSCHIT00000011259	ENSCHIG00000000459	7.17e-154	9.38e-14	2.99e-07
TCONS_00052259	ENSCHIG00000000459	7.17e-154	4.31e-14	2.84e-07
TCONS_00215500	ENSCHIG00000000459	7.17e-154	1.58e-17	2.6e-08
ENSCHIT00000011258	ENSCHIG00000000459	7.17e-154	-1.85e-17	0.00029387
ENSCHIT00000010755	ENSCHIG00000000459	7.17e-154	0.360758	2.86e-109
ENSCHIT00000004774	ENSCHIG00000000459	7.17e-154	-1.12e-11	3.18e-07
ENSCHIT00000006883	ENSCHIG00000000460	3.26e-12	0.84233	0.000262624
ENSCHIT00000003201	ENSCHIG00000000460	3.26e-12	-0.784941	2.77e-06
ENSCHIT00000010406	ENSCHIG00000000462	1.55e-48	-1733.94	4.41e-45
ENSCHIT00000010480	ENSCHIG00000000462	1.55e-48	-86.5037	2.72e-43
ENSCHIT00000010691	ENSCHIG00000000462	1.55e-48	655.051	2.09e-45
ENSCHIT00000010581	ENSCHIG00000000462	1.55e-48	-182.598	4e-45
ENSCHIT00000010204	ENSCHIG00000000462	1.55e-48	155.969	1.4e-43
ENSCHIT00000010191	ENSCHIG00000000462	1.55e-48	289.77	1.66e-45
TCONS_00183438	ENSCHIG00000000462	1.55e-48	-480.908	8.59e-46
TCONS_00014930	ENSCHIG00000000462	1.55e-48	9.35e-15	0.0144441
ENSCHIT00000010475	ENSCHIG00000000462	1.55e-48	-21.1401	4.43e-44
ENSCHIT00000010605	ENSCHIG00000000462	1.55e-48	1732.49	7.86e-45
ENSCHIT00000010432	ENSCHIG00000000463	9.75e-09	-3.20283	9.75e-09
ENSCHIT00000001036	ENSCHIG00000000464	1.62e-178	-14.6994	6.49e-166
ENSCHIT00000005497	ENSCHIG00000000464	1.62e-178	-6.28755	1.54e-161
ENSCHIT00000009135	ENSCHIG00000000464	1.62e-178	-0.708687	4.75e-155
ENSCHIT00000001899	ENSCHIG00000000464	1.62e-178	-2.55558	1.69e-163
ENSCHIT00000006002	ENSCHIG00000000464	1.62e-178	9.18812	5.76e-167
ENSCHIT00000005167	ENSCHIG00000000464	1.62e-178	6.7681	1.02e-152
ENSCHIT00000002247	ENSCHIG00000000464	1.62e-178	-3.66532	6.24e-162
ENSCHIT00000002950	ENSCHIG00000000464	1.62e-178	0.635688	8.6e-162
ENSCHIT00000006965	ENSCHIG00000000464	1.62e-178	-0.858543	8.42e-164
ENSCHIT00000010228	ENSCHIG00000000465	9.51e-163	36.235	9.43e-159
ENSCHIT00000010204	ENSCHIG00000000465	9.51e-163	170.009	7.51e-142
ENSCHIT00000010684	ENSCHIG00000000465	9.51e-163	-30.4223	1.76e-154
ENSCHIT00000010980	ENSCHIG00000000465	9.51e-163	-1945.55	3.17e-142
ENSCHIT00000000872	ENSCHIG00000000465	9.51e-163	1.2175	1.14e-156
ENSCHIT00000011347	ENSCHIG00000000465	9.51e-163	-2.21753	3.39e-149
ENSCHIT00000010427	ENSCHIG00000000465	9.51e-163	-1.13731	2.82e-156
ENSCHIT00000010406	ENSCHIG00000000465	9.51e-163	46.9524	1.15e-155
ENSCHIT00000010976	ENSCHIG00000000465	9.51e-163	-4.71192	4.51e-155
ENSCHIT00000010691	ENSCHIG00000000466	4.42e-176	-4.43358	1.36e-171
ENSCHIT00000001849	ENSCHIG00000000466	4.42e-176	12.0557	1.9e-166
ENSCHIT00000001397	ENSCHIG00000000466	4.42e-176	3.66969	4.83e-167
ENSCHIT00000002687	ENSCHIG00000000466	4.42e-176	-24.7365	3.83e-170
ENSCHIT00000002015	ENSCHIG00000000466	4.42e-176	-0.259359	1.65e-165
ENSCHIT00000010581	ENSCHIG00000000466	4.42e-176	0.704819	4.45e-165
ENSCHIT00000002948	ENSCHIG00000000466	4.42e-176	-0.628114	6.94e-166
ENSCHIT00000001056	ENSCHIG00000000466	4.42e-176	0.749137	2.46e-166
ENSCHIT00000002866	ENSCHIG00000000466	4.42e-176	-2.16438	2.43e-161
TCONS_00021781	ENSCHIG00000000467	2.38e-83	0.113773	1.1e-76
TCONS_00066283	ENSCHIG00000000467	2.38e-83	1.58e-17	0.00108972
TCONS_00020743	ENSCHIG00000000467	2.38e-83	-2.77e-17	0.00198257
TCONS_00059426	ENSCHIG00000000467	2.38e-83	-9.01e-17	0.00633631
TCONS_00309540	ENSCHIG00000000467	2.38e-83	-4.11e-17	0.00656172
TCONS_00119702	ENSCHIG00000000467	2.38e-83	0.00706944	3.86e-70
TCONS_00104198	ENSCHIG00000000467	2.38e-83	-2.36e-17	0.000576048
ENSCHIT00000000858	ENSCHIG00000000467	2.38e-83	-4.86e-17	0.00383433
ENSCHIT00000010684	ENSCHIG00000000469	3.8e-90	-797.33	1.63e-80
ENSCHIT00000010480	ENSCHIG00000000469	3.8e-90	-158.741	2.62e-80
ENSCHIT00000010406	ENSCHIG00000000469	3.8e-90	-108.229	1.56e-79
ENSCHIT00000010691	ENSCHIG00000000469	3.8e-90	-186.762	6.22e-80
ENSCHIT00000010605	ENSCHIG00000000469	3.8e-90	-1159.02	2.26e-80
TCONS_00105630	ENSCHIG00000000469	3.8e-90	6.8e-15	0.0271369
TCONS_00078498	ENSCHIG00000000469	3.8e-90	1.28e-13	0.017262
ENSCHIT00000010204	ENSCHIG00000000469	3.8e-90	432.756	2.3e-80
ENSCHIT00000010475	ENSCHIG00000000469	3.8e-90	28.1441	1.31e-80
ENSCHIT00000010581	ENSCHIG00000000469	3.8e-90	92.5276	4.79e-80
TCONS_00183438	ENSCHIG00000000469	3.8e-90	30.4058	3.53e-79
ENSCHIT00000006004	ENSCHIG00000000472	1.16e-164	25.4664	5.46e-157
ENSCHIT00000001428	ENSCHIG00000000472	1.16e-164	23.8507	5.95e-158
ENSCHIT00000001721	ENSCHIG00000000472	1.16e-164	133.319	4.93e-157
ENSCHIT00000000875	ENSCHIG00000000472	1.16e-164	45.8252	1.08e-157
ENSCHIT00000005490	ENSCHIG00000000472	1.16e-164	304.382	1.85e-157
ENSCHIT00000006321	ENSCHIG00000000472	1.16e-164	26.6444	3.78e-157
ENSCHIT00000007263	ENSCHIG00000000472	1.16e-164	13.849	2.96e-156
ENSCHIT00000001968	ENSCHIG00000000472	1.16e-164	18.2633	4.56e-148
ENSCHIT00000000980	ENSCHIG00000000472	1.16e-164	-21.4524	5.16e-158
ENSCHIT00000004729	ENSCHIG00000000473	2.16e-12	0.923538	0.000752893
ENSCHIT00000008144	ENSCHIG00000000473	2.16e-12	3.497	8.4e-05
ENSCHIT00000010475	ENSCHIG00000000474	7.32e-113	-10.4885	8.32e-102
ENSCHIT00000010406	ENSCHIG00000000474	7.32e-113	21.4396	2.89e-100
ENSCHIT00000010581	ENSCHIG00000000474	7.32e-113	-43.0202	8.85e-102
TCONS_00183438	ENSCHIG00000000474	7.32e-113	-55.1755	6.51e-102
ENSCHIT00000010605	ENSCHIG00000000474	7.32e-113	393.079	8.46e-102
ENSCHIT00000010684	ENSCHIG00000000474	7.32e-113	254.685	8.13e-102
ENSCHIT00000010204	ENSCHIG00000000474	7.32e-113	-123.297	1.01e-101
ENSCHIT00000010480	ENSCHIG00000000474	7.32e-113	43.206	1.01e-101
ENSCHIT00000010466	ENSCHIG00000000474	7.32e-113	16.2838	7.16e-102
ENSCHIT00000009901	ENSCHIG00000000476	2.17e-14	-75.3437	1.51e-05
ENSCHIT00000005031	ENSCHIG00000000476	2.17e-14	-71.1368	0.0216168
ENSCHIT00000009983	ENSCHIG00000000476	2.17e-14	50.0629	2.83e-07
ENSCHIT00000009109	ENSCHIG00000000476	2.17e-14	-2.76194	0.018329
ENSCHIT00000010942	ENSCHIG00000000477	5.04e-114	1.04047	4.52e-101
ENSCHIT00000010204	ENSCHIG00000000477	5.04e-114	813.625	5.98e-101
ENSCHIT00000000777	ENSCHIG00000000477	5.04e-114	-0.754462	9.86e-102
ENSCHIT00000011347	ENSCHIG00000000477	5.04e-114	-2.5119	3.17e-101
ENSCHIT00000010773	ENSCHIG00000000477	5.04e-114	-2.79376	2.38e-101
TCONS_00078498	ENSCHIG00000000477	5.04e-114	-1.29e-13	0.00246763
ENSCHIT00000010480	ENSCHIG00000000477	5.04e-114	-5.69377	3.73e-101
ENSCHIT00000011312	ENSCHIG00000000477	5.04e-114	-0.2272	1.27e-96
ENSCHIT00000010980	ENSCHIG00000000477	5.04e-114	-8505.95	6.04e-101
ENSCHIT00000010908	ENSCHIG00000000477	5.04e-114	-0.263816	5.93e-103
ENSCHIT00000002800	ENSCHIG00000000478	9.91e-124	11.6528	3.25e-114
ENSCHIT00000001639	ENSCHIG00000000478	9.91e-124	-0.181615	2.25e-107
ENSCHIT00000010605	ENSCHIG00000000478	9.91e-124	183.838	3.15e-117
ENSCHIT00000001255	ENSCHIG00000000478	9.91e-124	-13.0954	1.33e-116
ENSCHIT00000003293	ENSCHIG00000000478	9.91e-124	-3.10857	8.78e-111
ENSCHIT00000001691	ENSCHIG00000000478	9.91e-124	190.415	3.12e-116
TCONS_00319548	ENSCHIG00000000478	9.91e-124	-1.68e-15	0.000844265
ENSCHIT00000001031	ENSCHIG00000000478	9.91e-124	1.93608	5.45e-113
TCONS_00324902	ENSCHIG00000000478	9.91e-124	-8.97e-16	0.0196952
TCONS_00280515	ENSCHIG00000000478	9.91e-124	3.31e-15	0.00191458
ENSCHIT00000001803	ENSCHIG00000000478	9.91e-124	-42.296	1.7e-116
ENSCHIT00000002069	ENSCHIG00000000478	9.91e-124	0.031953	1e-105
ENSCHIT00000010605	ENSCHIG00000000481	1.64e-77	-265.143	4.81e-73
ENSCHIT00000010691	ENSCHIG00000000481	1.64e-77	-50.4025	7.07e-70
ENSCHIT00000011312	ENSCHIG00000000481	1.64e-77	-157.239	5.31e-72
ENSCHIT00000010942	ENSCHIG00000000481	1.64e-77	-6.88581	1.08e-72
ENSCHIT00000010980	ENSCHIG00000000481	1.64e-77	-337629	2.94e-70
ENSCHIT00000010983	ENSCHIG00000000481	1.64e-77	10.1387	1.23e-67
ENSCHIT00000010480	ENSCHIG00000000481	1.64e-77	-19.059	1.96e-68
ENSCHIT00000010406	ENSCHIG00000000481	1.64e-77	-266.254	4.76e-72
ENSCHIT00000010204	ENSCHIG00000000481	1.64e-77	32062.8	2.9e-70
TCONS_00072227	ENSCHIG00000000483	1.34e-128	0.113653	3.79e-114
ENSCHIT00000002059	ENSCHIG00000000483	1.34e-128	-0.87723	9.62e-120
ENSCHIT00000002330	ENSCHIG00000000483	1.34e-128	0.998259	4.7e-122
TCONS_00377808	ENSCHIG00000000483	1.34e-128	-1.66e-19	0.0497244
ENSCHIT00000010976	ENSCHIG00000000483	1.34e-128	-0.127799	1.06e-118
ENSCHIT00000000776	ENSCHIG00000000483	1.34e-128	1.23085	2.48e-122
ENSCHIT00000001894	ENSCHIG00000000483	1.34e-128	0.113251	1.29e-120
ENSCHIT00000011372	ENSCHIG00000000483	1.34e-128	-0.503284	1.55e-114
ENSCHIT00000011223	ENSCHIG00000000483	1.34e-128	0.548582	2.18e-118
ENSCHIT00000001641	ENSCHIG00000000483	1.34e-128	-0.0745166	2.37e-114
TCONS_00183438	ENSCHIG00000000484	1.57e-14	0.505191	1.78e-10
ENSCHIT00000010847	ENSCHIG00000000484	1.57e-14	-23.7937	1.07e-12
ENSCHIT00000010980	ENSCHIG00000000484	1.57e-14	-182550	2.4e-12
ENSCHIT00000010475	ENSCHIG00000000484	1.57e-14	-4.87665	2.59e-12
ENSCHIT00000010204	ENSCHIG00000000484	1.57e-14	17466.5	2.38e-12
ENSCHIT00000010605	ENSCHIG00000000484	1.57e-14	221.628	2.13e-12
ENSCHIT00000010581	ENSCHIG00000000484	1.57e-14	-22.0247	1.13e-12
ENSCHIT00000010480	ENSCHIG00000000484	1.57e-14	-108.93	4.03e-13
ENSCHIT00000010406	ENSCHIG00000000484	1.57e-14	-16.8133	4.22e-11
ENSCHIT00000005468	ENSCHIG00000000486	1.66e-10	-2.81036	0.0259333
ENSCHIT00000005380	ENSCHIG00000000486	1.66e-10	-5.71412	0.00174036
ENSCHIT00000002189	ENSCHIG00000000486	1.66e-10	17.8289	0.0164338
ENSCHIT00000009535	ENSCHIG00000000487	8.66e-09	-12.6227	8.66e-09
ENSCHIT00000004768	ENSCHIG00000000488	1.45e-10	-9.14403	0.0133962
TCONS_00146900	ENSCHIG00000000488	1.45e-10	-0.722273	0.0104315
ENSCHIT00000009983	ENSCHIG00000000488	1.45e-10	5.88915	0.000167113
ENSCHIT00000009527	ENSCHIG00000000488	1.45e-10	29.09	0.00421945
ENSCHIT00000010475	ENSCHIG00000000489	3.98e-90	-39.4057	4.53e-83
ENSCHIT00000010204	ENSCHIG00000000489	3.98e-90	-466.497	1.08e-82
ENSCHIT00000010691	ENSCHIG00000000489	3.98e-90	366.462	6.15e-83
ENSCHIT00000010480	ENSCHIG00000000489	3.98e-90	170.498	6.89e-83
ENSCHIT00000010684	ENSCHIG00000000489	3.98e-90	904.059	1.09e-82
TCONS_00183438	ENSCHIG00000000489	3.98e-90	-64.5634	5.72e-83
ENSCHIT00000010581	ENSCHIG00000000489	3.98e-90	-160.249	3.32e-83
TCONS_00078498	ENSCHIG00000000489	3.98e-90	1.8e-13	0.0297098
TCONS_00319548	ENSCHIG00000000489	3.98e-90	-6.72e-15	0.0158949
ENSCHIT00000010406	ENSCHIG00000000489	3.98e-90	135.489	6.62e-83
ENSCHIT00000010605	ENSCHIG00000000489	3.98e-90	1821.68	4.69e-83
ENSCHIT00000010983	ENSCHIG00000000490	2.37e-90	-640.061	1.68e-81
ENSCHIT00000010406	ENSCHIG00000000490	2.37e-90	2083.48	8.54e-81
TCONS_00183438	ENSCHIG00000000490	2.37e-90	-66.8866	5.11e-79
ENSCHIT00000010475	ENSCHIG00000000490	2.37e-90	48.7412	5.78e-81
ENSCHIT00000010480	ENSCHIG00000000490	2.37e-90	859.147	2.42e-81
ENSCHIT00000010204	ENSCHIG00000000490	2.37e-90	-399074	6.92e-82
ENSCHIT00000010605	ENSCHIG00000000490	2.37e-90	-943.209	2.18e-79
ENSCHIT00000010980	ENSCHIG00000000490	2.37e-90	4.21451e+06	6.88e-82
ENSCHIT00000010743	ENSCHIG00000000490	2.37e-90	-137.584	6.95e-82
ENSCHIT00000008149	ENSCHIG00000000491	4.26e-11	4.11736	0.00061346
ENSCHIT00000009535	ENSCHIG00000000491	4.26e-11	-63.1137	0.00125245
ENSCHIT00000000941	ENSCHIG00000000492	2.04e-08	-4.41516	2.04e-08
ENSCHIT00000007805	ENSCHIG00000000493	5.29e-09	-24.7843	5.29e-09
ENSCHIT00000005239	ENSCHIG00000000496	1.44e-11	13.1283	1.58e-05
ENSCHIT00000006966	ENSCHIG00000000496	1.44e-11	113.168	1.03e-05
ENSCHIT00000005076	ENSCHIG00000000497	1.5e-140	-2.3938	2.51e-135
ENSCHIT00000005139	ENSCHIG00000000497	1.5e-140	-2.13369	3.69e-136
ENSCHIT00000001428	ENSCHIG00000000497	1.5e-140	-0.290605	1.82e-125
ENSCHIT00000005490	ENSCHIG00000000497	1.5e-140	-19.6767	8.08e-132
ENSCHIT00000000980	ENSCHIG00000000497	1.5e-140	0.46502	1.39e-128
ENSCHIT00000001721	ENSCHIG00000000497	1.5e-140	-13.9605	1.5e-133
ENSCHIT00000002441	ENSCHIG00000000497	1.5e-140	-2.1582	1.9e-133
ENSCHIT00000000875	ENSCHIG00000000497	1.5e-140	-0.244347	1.08e-122
ENSCHIT00000001639	ENSCHIG00000000497	1.5e-140	-3.27206	3.12e-134
TCONS_00021563	ENSCHIG00000000498	4.5e-117	21.9789	2.09e-105
TCONS_00291616	ENSCHIG00000000498	4.5e-117	-3690.97	4.42e-105
TCONS_00219512	ENSCHIG00000000498	4.5e-117	1693.33	5.5e-105
ENSCHIT00000009215	ENSCHIG00000000498	4.5e-117	-527.83	6.52e-105
TCONS_00171693	ENSCHIG00000000498	4.5e-117	2.33e-13	2.98e-05
ENSCHIT00000010404	ENSCHIG00000000498	4.5e-117	5.59805	1.15e-101
ENSCHIT00000006623	ENSCHIG00000000498	4.5e-117	0.0199635	1.62e-87
TCONS_00205661	ENSCHIG00000000498	4.5e-117	466.215	3e-105
TCONS_00020246	ENSCHIG00000000498	4.5e-117	-4.62e-13	0.000123749
ENSCHIT00000005029	ENSCHIG00000000498	4.5e-117	0.0073213	5e-86
ENSCHIT00000001422	ENSCHIG00000000498	4.5e-117	0.174844	7.99e-101
ENSCHIT00000002785	ENSCHIG00000000499	3.09e-15	-0.426168	0.00657679
TCONS_00374361	ENSCHIG00000000499	3.09e-15	10.2887	1.33e-06
ENSCHIT00000000776	ENSCHIG00000000499	3.09e-15	-6.20283	0.00178391
ENSCHIT00000006031	ENSCHIG00000000499	3.09e-15	10.7004	1.45e-07
ENSCHIT00000002059	ENSCHIG00000000499	3.09e-15	-2.50829	6.88e-05
ENSCHIT00000009990	ENSCHIG00000000499	3.09e-15	8.6214	0.000236913
ENSCHIT00000005263	ENSCHIG00000000501	5.36e-179	-317255	2.56e-170
ENSCHIT00000001966	ENSCHIG00000000501	5.36e-179	-2.70808	3.35e-169
ENSCHIT00000007479	ENSCHIG00000000501	5.36e-179	-0.457694	6.56e-164
ENSCHIT00000002847	ENSCHIG00000000501	5.36e-179	-7.43131	3.35e-169
ENSCHIT00000007471	ENSCHIG00000000501	5.36e-179	-8.55203	1.04e-170
ENSCHIT00000007320	ENSCHIG00000000501	5.36e-179	0.356949	1.25e-168
ENSCHIT00000010668	ENSCHIG00000000501	5.36e-179	6.08324	1e-170
ENSCHIT00000005708	ENSCHIG00000000501	5.36e-179	5.36116	1.54e-171
ENSCHIT00000001789	ENSCHIG00000000501	5.36e-179	0.628248	9.94e-169
ENSCHIT00000010480	ENSCHIG00000000502	4.58e-88	-72.0117	4.82e-83
ENSCHIT00000010475	ENSCHIG00000000502	4.58e-88	10.25	2.52e-81
ENSCHIT00000010605	ENSCHIG00000000502	4.58e-88	-569.232	1.97e-81
ENSCHIT00000010204	ENSCHIG00000000502	4.58e-88	127745	2.37e-81
ENSCHIT00000010691	ENSCHIG00000000502	4.58e-88	-60.0508	2.29e-78
ENSCHIT00000010980	ENSCHIG00000000502	4.58e-88	-1.34914e+06	2.38e-81
ENSCHIT00000010466	ENSCHIG00000000502	4.58e-88	-31.423	4.56e-83
TCONS_00078498	ENSCHIG00000000502	4.58e-88	-3.56e-11	0.00339691
ENSCHIT00000010743	ENSCHIG00000000502	4.58e-88	11.6038	1.91e-80
ENSCHIT00000010406	ENSCHIG00000000502	4.58e-88	-368.716	5.38e-82
TCONS_00183438	ENSCHIG00000000504	3.09e-38	-35.0586	2.34e-35
ENSCHIT00000010480	ENSCHIG00000000504	3.09e-38	61.3637	8.31e-36
ENSCHIT00000000777	ENSCHIG00000000504	3.09e-38	7.37831	1.91e-33
ENSCHIT00000010204	ENSCHIG00000000504	3.09e-38	-21119	1.21e-34
ENSCHIT00000010406	ENSCHIG00000000504	3.09e-38	51.8138	4.34e-33
ENSCHIT00000010983	ENSCHIG00000000504	3.09e-38	-75.154	5.84e-36
ENSCHIT00000011398	ENSCHIG00000000504	3.09e-38	-8.76524	4.62e-36
ENSCHIT00000010980	ENSCHIG00000000504	3.09e-38	223460	1.2e-34
ENSCHIT00000010605	ENSCHIG00000000504	3.09e-38	-27.0103	8.53e-34
TCONS_00180663	ENSCHIG00000000505	1.1e-159	1.16966	2.9e-103
TCONS_00059711	ENSCHIG00000000505	1.1e-159	1.29e-14	2.96e-11
TCONS_00112439	ENSCHIG00000000505	1.1e-159	-0.318074	3.16e-105
ENSCHIT00000000980	ENSCHIG00000000506	2.55e-157	-5.68529	1.85e-149
ENSCHIT00000002663	ENSCHIG00000000506	2.55e-157	-10.3352	5.17e-149
ENSCHIT00000001923	ENSCHIG00000000506	2.55e-157	32.8898	1.41e-151
ENSCHIT00000001652	ENSCHIG00000000506	2.55e-157	13513.7	8.54e-145
TCONS_00176796	ENSCHIG00000000506	2.55e-157	-0.125652	2.48e-146
ENSCHIT00000001019	ENSCHIG00000000506	2.55e-157	-7.65926	6.55e-148
ENSCHIT00000001673	ENSCHIG00000000506	2.55e-157	-0.51644	2.66e-146
ENSCHIT00000001428	ENSCHIG00000000506	2.55e-157	0.750423	1.81e-141
TCONS_00366470	ENSCHIG00000000506	2.55e-157	-0.316615	2.83e-133
ENSCHIT00000007001	ENSCHIG00000000508	2.99e-08	0.22319	0.0011873
ENSCHIT00000002561	ENSCHIG00000000509	3.2e-09	11.1667	0.00822778
ENSCHIT00000011319	ENSCHIG00000000509	3.2e-09	18.7195	0.0257445
ENSCHIT00000010022	ENSCHIG00000000510	2.55e-174	69.2594	8.43e-167
ENSCHIT00000001632	ENSCHIG00000000510	2.55e-174	-9.24314	3.27e-165
ENSCHIT00000007226	ENSCHIG00000000510	2.55e-174	-5.87955	3.62e-167
ENSCHIT00000001145	ENSCHIG00000000510	2.55e-174	-21.4147	4.3e-165
ENSCHIT00000010505	ENSCHIG00000000510	2.55e-174	0.705001	3.32e-142
ENSCHIT00000001031	ENSCHIG00000000510	2.55e-174	-3.45873	1.71e-165
ENSCHIT00000003392	ENSCHIG00000000510	2.55e-174	-3.15643	6.36e-166
ENSCHIT00000005313	ENSCHIG00000000510	2.55e-174	-3.07911	4.86e-163
ENSCHIT00000002661	ENSCHIG00000000510	2.55e-174	142041	1.04e-167
TCONS_00062993	ENSCHIG00000000512	2.74e-111	-1.34e-15	0.0357955
ENSCHIT00000001144	ENSCHIG00000000512	2.74e-111	-3.07411	1.47e-99
ENSCHIT00000001428	ENSCHIG00000000512	2.74e-111	0.517873	2.15e-100
ENSCHIT00000000885	ENSCHIG00000000512	2.74e-111	-0.105402	7.16e-95
ENSCHIT00000001154	ENSCHIG00000000512	2.74e-111	-2.21309	7.07e-100
TCONS_00176796	ENSCHIG00000000512	2.74e-111	-0.0722354	1.75e-105
ENSCHIT00000001585	ENSCHIG00000000512	2.74e-111	14.3677	9.04e-105
ENSCHIT00000000875	ENSCHIG00000000512	2.74e-111	0.320395	2.81e-101
ENSCHIT00000000955	ENSCHIG00000000512	2.74e-111	2.45793	4.95e-105
ENSCHIT00000000929	ENSCHIG00000000512	2.74e-111	-2.5536	4.88e-104
ENSCHIT00000001522	ENSCHIG00000000513	1.72e-09	-25.6681	1.72e-09
ENSCHIT00000008149	ENSCHIG00000000514	3.34e-09	5.79746	3.34e-09
ENSCHIT00000001033	ENSCHIG00000000515	7.73e-163	-16.5874	5.94e-155
ENSCHIT00000003677	ENSCHIG00000000515	7.73e-163	-9.05118	2.16e-146
ENSCHIT00000003224	ENSCHIG00000000515	7.73e-163	84.5348	1.04e-151
ENSCHIT00000005204	ENSCHIG00000000515	7.73e-163	24.3077	1.14e-148
ENSCHIT00000010475	ENSCHIG00000000515	7.73e-163	3.0987	6.16e-153
ENSCHIT00000010976	ENSCHIG00000000515	7.73e-163	30.6605	1.21e-154
ENSCHIT00000010684	ENSCHIG00000000515	7.73e-163	46.813	6.43e-145
ENSCHIT00000003096	ENSCHIG00000000515	7.73e-163	-10.2022	4.71e-152
ENSCHIT00000001046	ENSCHIG00000000515	7.73e-163	-4.70197	4.3e-150
TCONS_00002961	ENSCHIG00000000516	1.97e-08	-0.458229	1.97e-08
ENSCHIT00000005559	ENSCHIG00000000517	3.38e-11	-1.63992	0.000415061
ENSCHIT00000001532	ENSCHIG00000000517	3.38e-11	0.617961	0.0145414
ENSCHIT00000002268	ENSCHIG00000000517	3.38e-11	0.0518409	0.0492198
TCONS_00000955	ENSCHIG00000000518	2.5e-66	1.23087	2.12e-61
ENSCHIT00000001255	ENSCHIG00000000519	6.04e-172	-4.54952	1.43e-162
ENSCHIT00000001578	ENSCHIG00000000519	6.04e-172	2.37526	2.74e-163
ENSCHIT00000001046	ENSCHIG00000000519	6.04e-172	-0.552955	5.27e-161
ENSCHIT00000010475	ENSCHIG00000000519	6.04e-172	-2.94094	2.81e-166
[truncated: 87,200 more rows]
