# Supplementary figures and images for: RNA-Seq Implies Divergent Regulation Patterns of LincRNA on Spermatogenesis and Testis Growth in Goats
Source: MDPI journal article supplement (doi:10.3390/ani11030625), 2021-02-26

**A**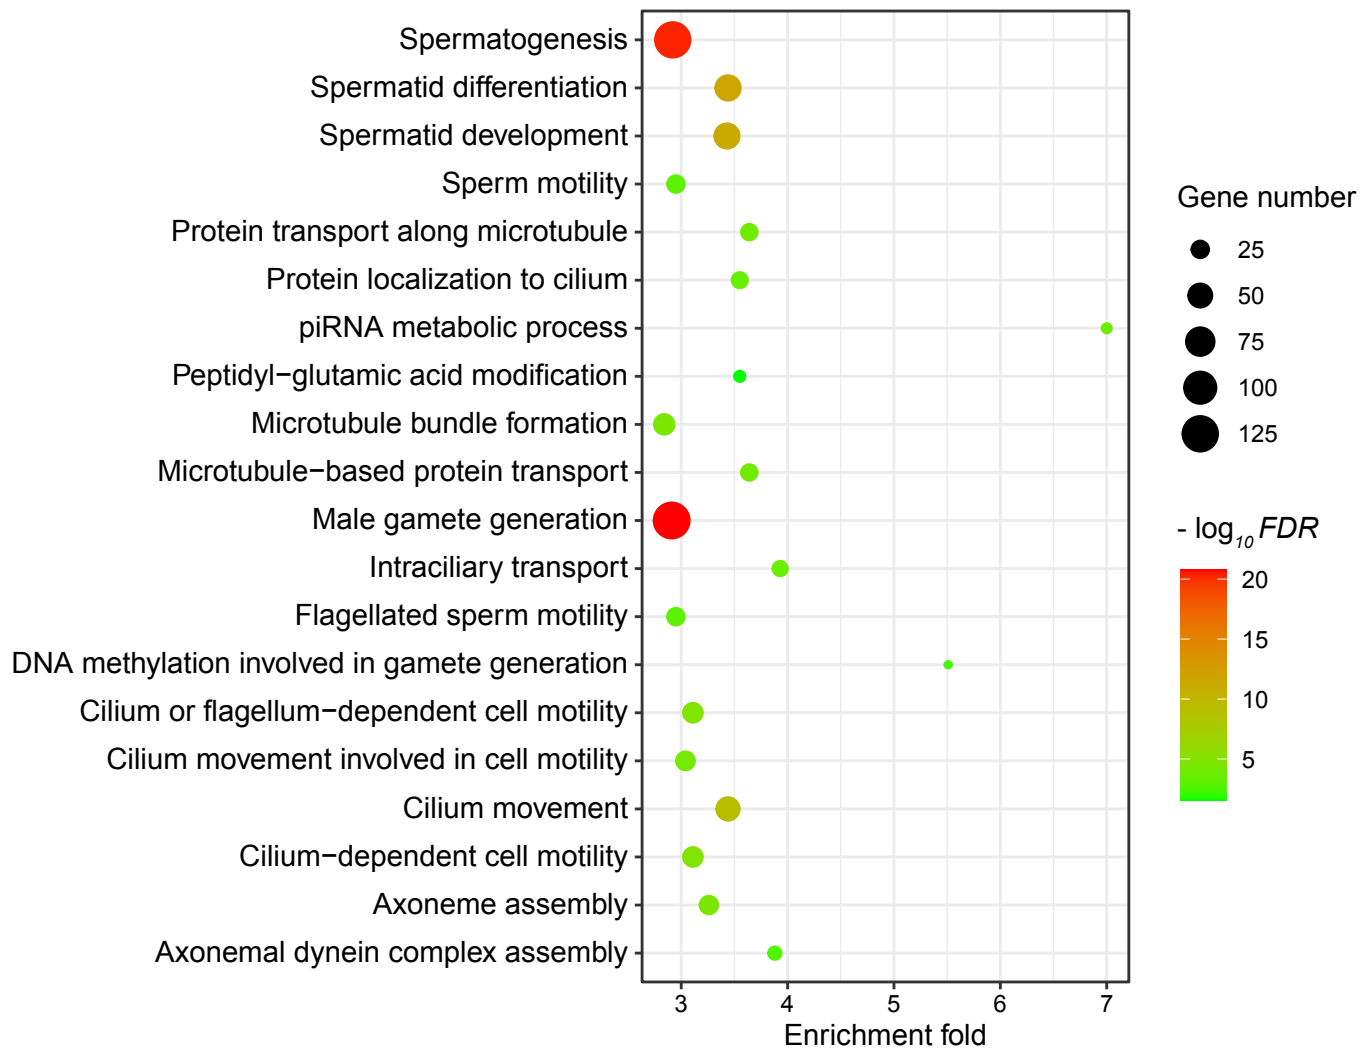**B**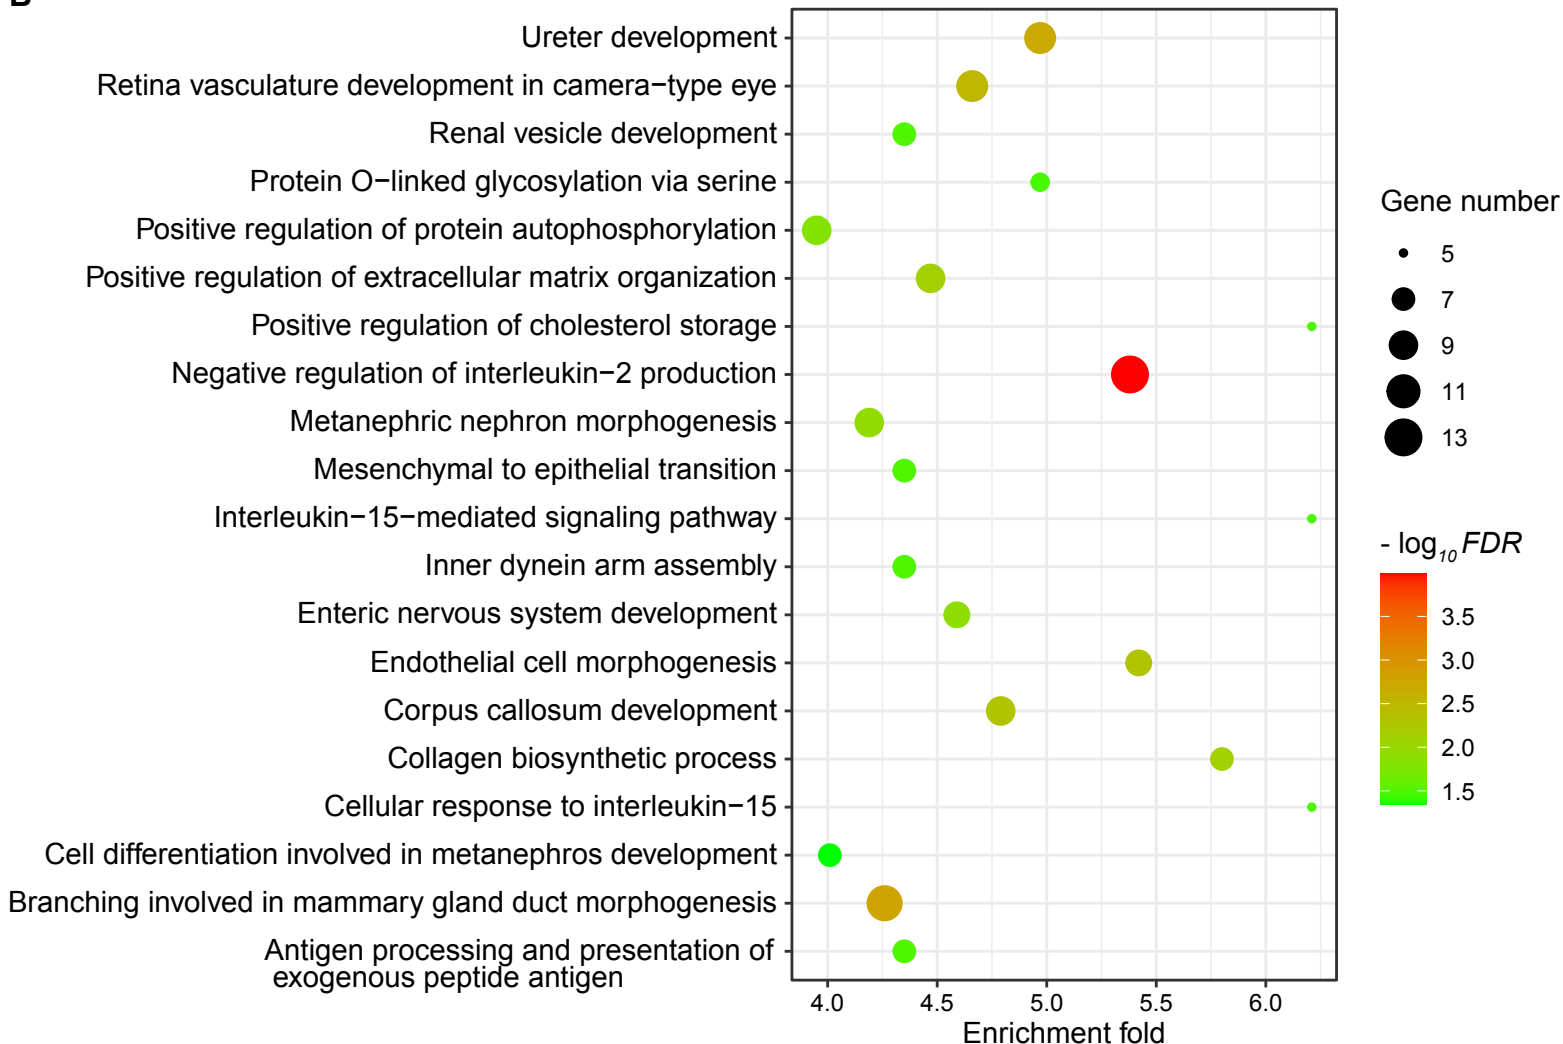

Supplement: s1 [file s1]

**A**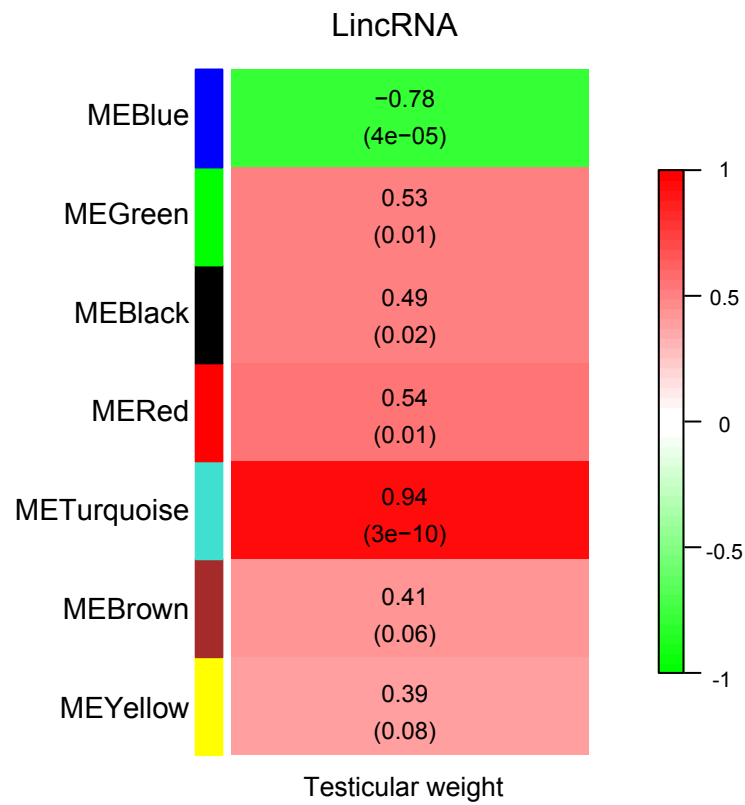**B**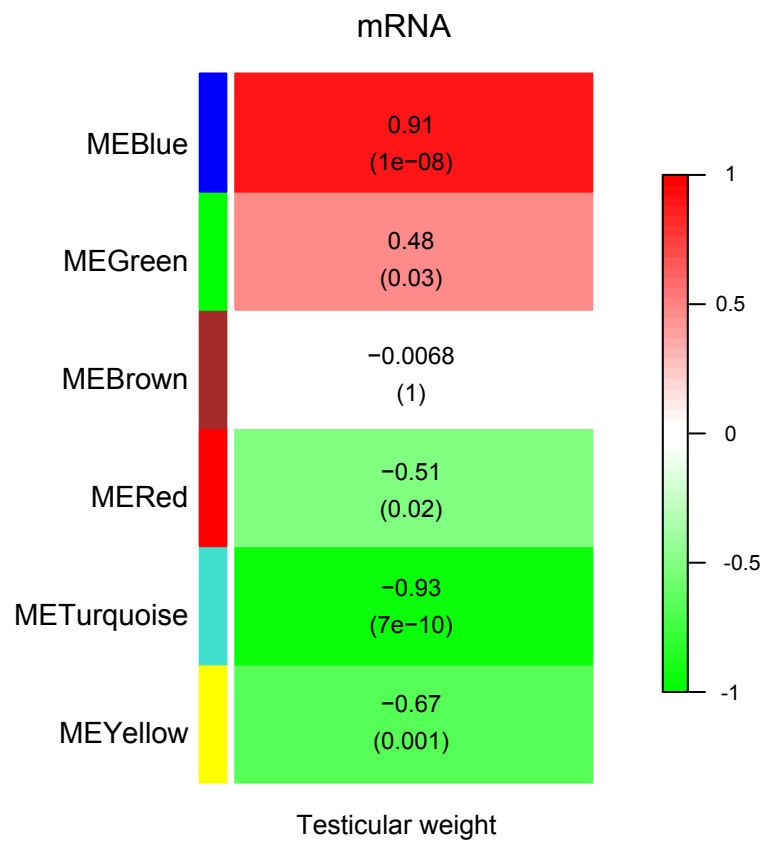

Supplement: s1 [file s1]

**A**

Cluster Dendrogram

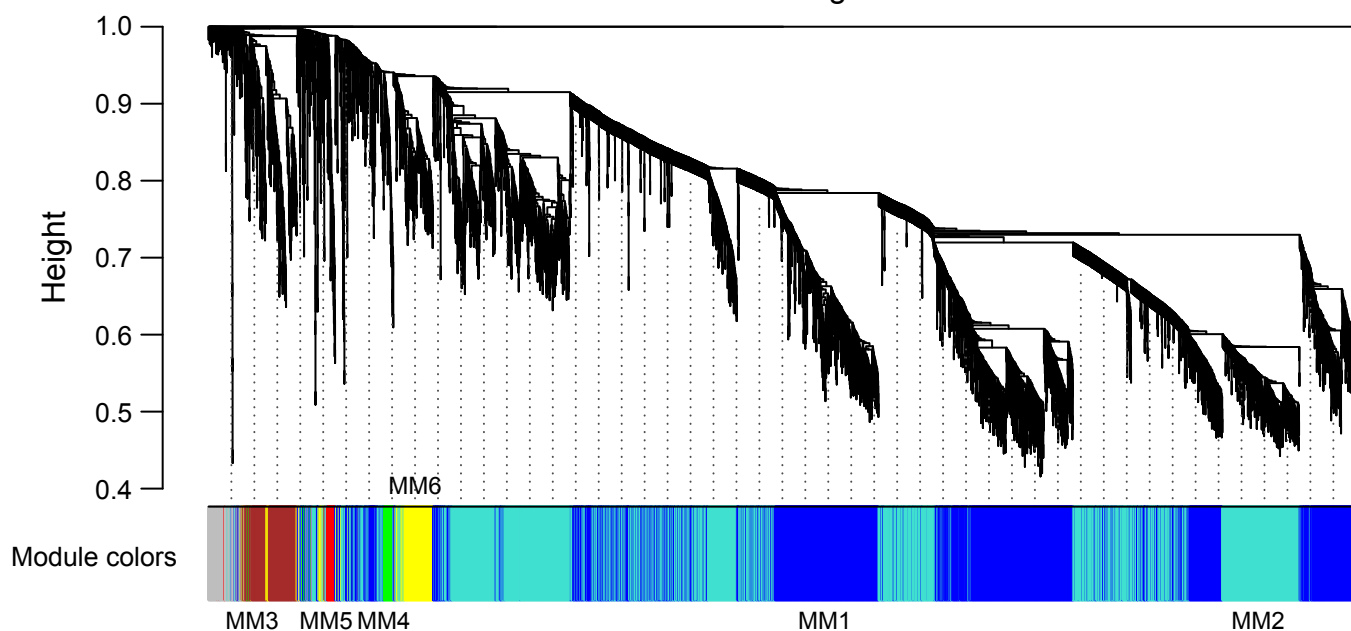**B**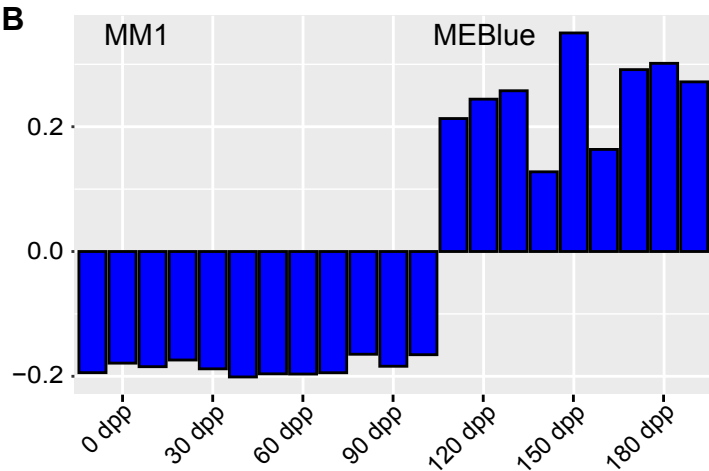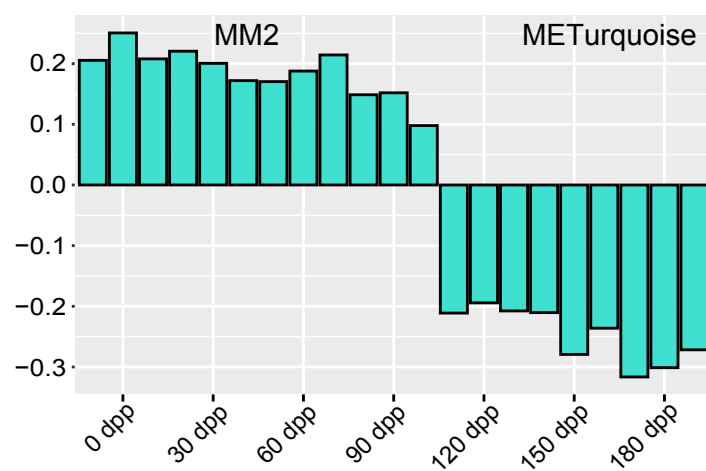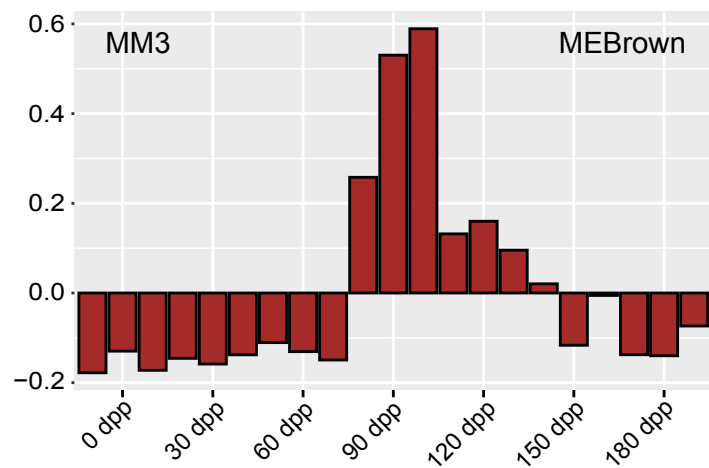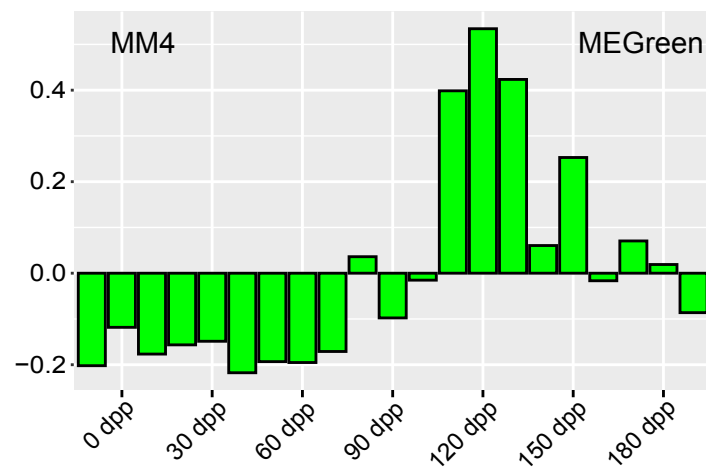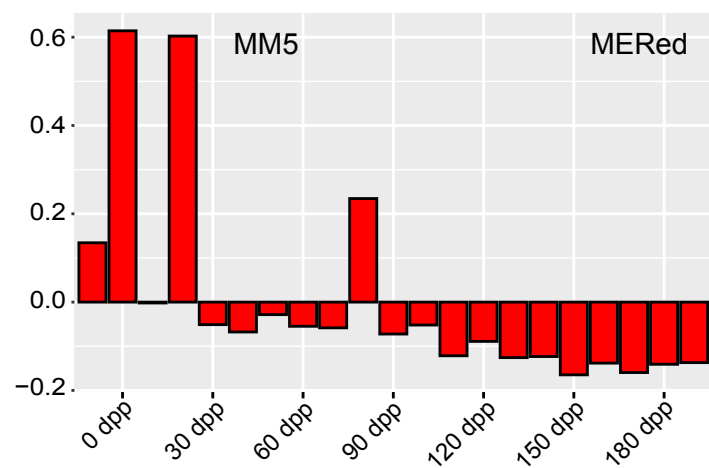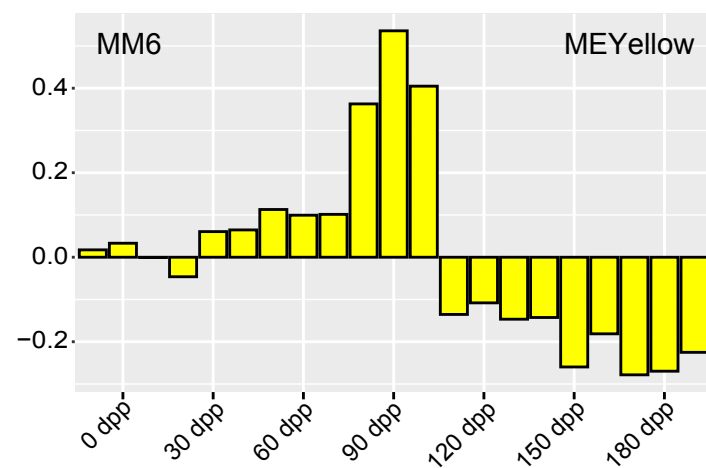

Supplement: s1 [file s1]

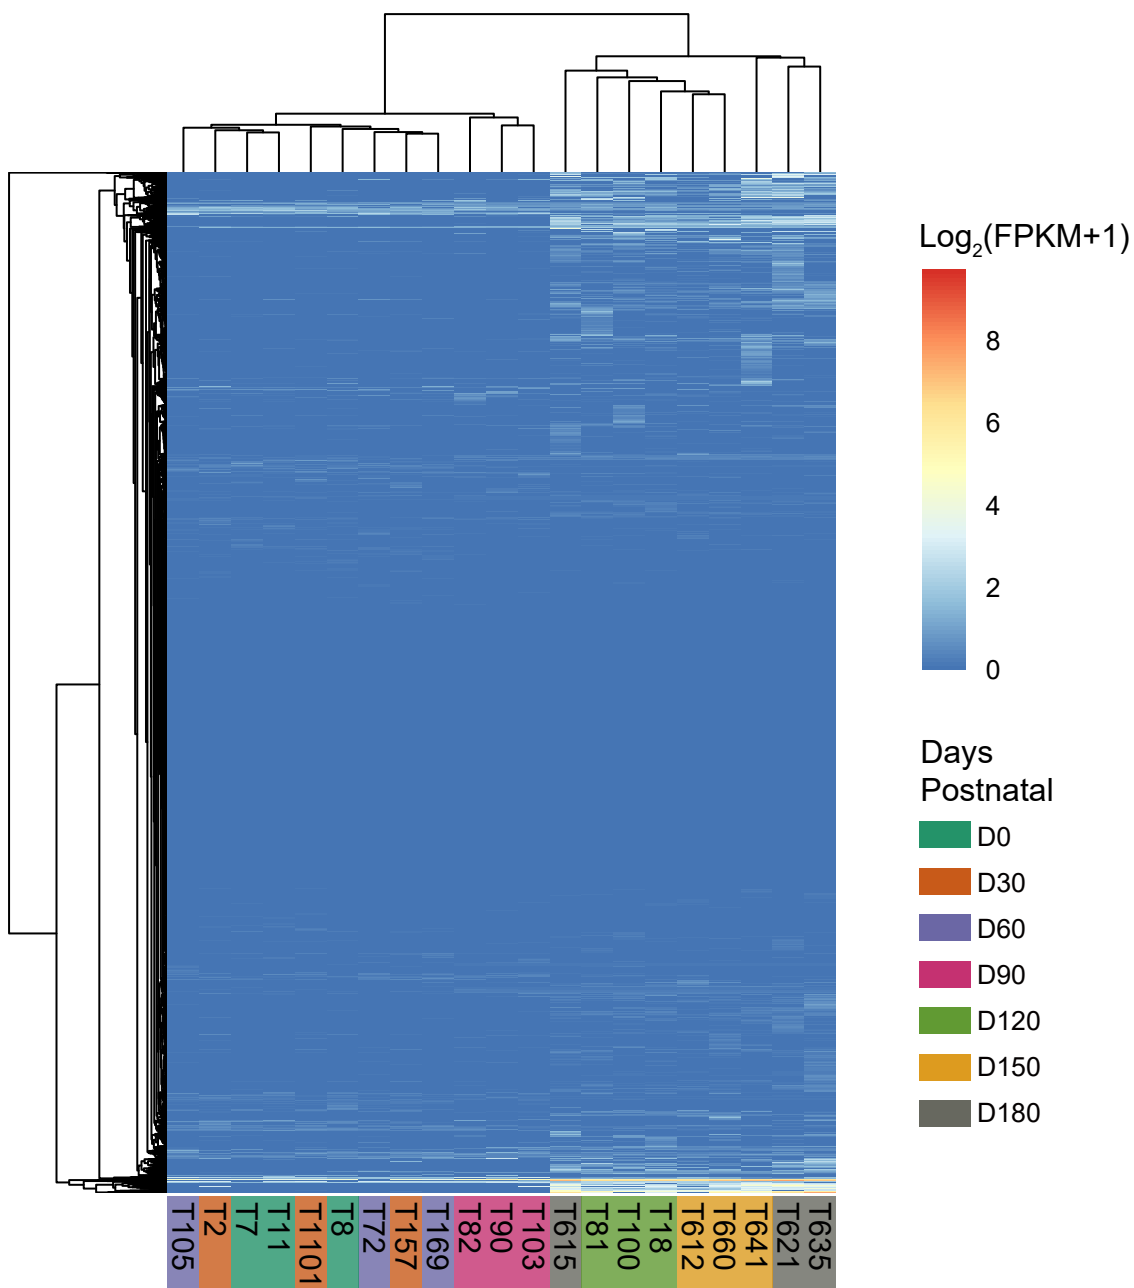

Supplement: s1 [file s1]
